# Supplementary material for: Time-Course of Transcriptomic Change in the Lungs of F344 Rats Repeatedly Exposed to a Multiwalled Carbon Nanotube in a 2-Year Test
Source: Nanomaterials (Basel). 2023 Jul 19;13(14):2105. doi: 10.3390/nano13142105 (PMC10383707; doi:10.3390/nano13142105)
Supplement: Supplementary file 1 [file nanomaterials-13-02105-s001.zip]

Archive with 11 entries (11 files):
- Supplementary Figures Hojo Nanomaterials_revised MH revised_July 19.pdf
- Table S1 primer list.xlsx
- Table S10 Lung cancer-related genes_MH revised_July 19.xlsx
- Table S2 Antibody list.xlsx
- Table S3 All DEGs.xlsx
- Table S4 All significant canonical pathways.xlsx
- Table S5 Upstream regulators.xlsx
- Table S6 All regulator effects.xlsx
- Table S7 PCR validation.xlsx
- Table S8 Overview of previous transcriptomic analyses_MH revised_July 19.xlsx
- Table S9 Pathways and Gene Ontology terms found in previous studies_MH revised_July 19.xlsx
