# Supplementary material for: Time-Course of Transcriptomic Change in the Lungs of F344 Rats Repeatedly Exposed to a Multiwalled Carbon Nanotube in a 2-Year Test
Source: Nanomaterials (Basel). 2023 Jul 19;13(14):2105. doi: 10.3390/nano13142105 (PMC10383707; doi:10.3390/nano13142105)
Supplement: Supplementary file 1 [file nanomaterials-13-02105-s001.zip › Table S1 primer list.xlsx]

## Sheet: Table S1 primer list
	Table S1. DNA sequences of qRT-PCR primers used in this study
	Gene symbol	Forward primer (5'-3')	Reverse primer (5'-3')	NCBI Accession number	Reference
	Spp1	AGGTCATCCCAGTTGCC	GGCCCTCTGCTTATACTCC	NM_012881	Chen et al., Cancer Med., 2020;9:4350–4359
	Mt3	CCCCTGTCCTACTGGTGGT	CTGCATTTCTCGGCCTTG	NM 053968	Scudiero et al., C. R. Biologies 2017, 340: 13–17
	Mmp12	GAGGTACGATGTGAGGCAGGAACTC	TTGGCCTGATTCCTGGGAAGTG	NM_053963	Umbright et al., J. Toxicol. Environ. Health Part A, 2017, 80, 23–24, 1349–1368
	Ccl2	CCAGATGCAGTTAATGCCCC	TCTCCAGCCGACTCATTGG	NM_031530
	Il6	AGGGAGATCTTGGAAATGAGAAAA	TCATCGCTGTTCATACAATCAGAA	NM_012589
	Zfp36	CTTTCCCCTTCTGCCTTCTC	TGGTGCTAGGGGTAGTAGAC	NM_133290	Guo et al., Sci. Rep. , 2017, 7: 2314
	Plau	ACAATGCTCACAGATCCGATG	AGGCCAATTTGCACATAGCAC	NM_013085	Wang et al., Oncotarget, 2016, 7(43): 69565–69578
	Plaur	GGACGAACCCTACACCAAAG	CATTGCATTGGGTGAAGTTG	NM_134352	Wang et al., Oncotarget, 2016, 7(43): 69565–69578
	Egfr	AAATGCTCTCTACGAAAACACC	CAGTTCTCCTCTCCTCTTCC	NM_031507	Kyotani et al. Exp. Cell Res., 2013, 319: 3042-3050
	Erbb2	CAGTGTGTCAACTGCAGTCA	CAGGAGTGGGTGCAGTTGAT	NM_017003	Kyotani et al. Exp. Cell Res., 2013, 319: 3042-3050
	Erbb3	CTGTTTAGGCCAAGCAGAGG	GACTTTGTTTGCCTTCTCGC	NM_017218	Kyotani et al. Exp. Cell Res., 2013, 319: 3042-3050
	Erbb4	GCTAGAGACCCTCAAAGATACC	GCATGGGCATTCCTTGTTGTGT	NM_021687	Kyotani et al. Exp. Cell Res., 2013, 319: 3042-3050
	Egf	CCCGTGTTCTTCTGAGTTCC	TGTAACCGTGGCTTCCTTCT	NM_012842	Kyotani et al. Exp. Cell Res., 2013, 319: 3042-3050
	Areg	AAGAATCCGTGTGCCGCCAAGTTT	TTTCTCCACACCGTTCGCCAAAGT	NM_017123	Ferreira et al., Front. Physiol., 2022, 13:838834
	Ereg	CACCGAGAGAAGGATGGAGA	GTGTCCATGCAAGCAGTAGC	NM_021689	Han et al., J. Cell Mol. Med., 2022, 26:4076–4086
	Btc	GCTTCGTGATGGACGAACAAAC	AGCAGACCACCAGGATCTGC	NM_022256	Kyotani et al. Exp. Cell Res., 2013, 319: 3042-3050
	Nrg1	GAAGGCGCAAACACTTCTTC	TTGGCAACGATCACCAGTAA	NM_031588	Kyotani et al. Exp. Cell Res., 2013, 319: 3042-3050
	Aplnr	GGACTCCGAATTCCCTTCTC	CTTGTGCAAGGTCAACCTCA	NM_031349	Ranjbar Kohan et al., Cell J. 2018, 20(3): 427-434
	Ephb4	TGAGGTGTGCGATATGAAGC	CAGGGACAGACATTCCATCA	XM_003751157 (variant1)	Liu et al., Int. J. Mol. Med., 2018, 42(5):2373-2382
	Unc5d	GCTGCATGTCCTGTAACTCCTTGG	CCGCCTTGGTGCCGTTCATC	NM_001107319	Wang et al., J. Endocrinol., 2020, 244: 445–458
	Cav1	GCAGACGAGGTGAATGAGAAG	GGTAGACAGCAAGCGGTAAAA	NM_031556	Liu et al., Biomed. & Pharmacother., 2019, 118: 109314
	Wif1	AGCCATTCCCGTCAATATCCA	TCTGCCATGATGCCTTTATCCA	NM_001399510	Takemura et al., J. Inflamm Res . 2019, 12:293-299
	Gapdh	CTGGAGAAACCTGCCAAGTATG	GGTGGAAGAATGGGAGTTGCT	NM_017008
