# Supplementary material for: Time-Course of Transcriptomic Change in the Lungs of F344 Rats Repeatedly Exposed to a Multiwalled Carbon Nanotube in a 2-Year Test
Source: Nanomaterials (Basel). 2023 Jul 19;13(14):2105. doi: 10.3390/nano13142105 (PMC10383707; doi:10.3390/nano13142105)
Supplement: Supplementary file 1 [file nanomaterials-13-02105-s001.zip › Table S2 Antibody list.xlsx]

## Sheet: Table S2 Antibody list
Table S2. Primary antibodies used in this study
Name	Supplier	Cat number	Antibody type	Antigen retrevaval	Dilution
TTF1 (8G7G3/1)	Abcam	ab72876	Mouse monoclonal	120 min; autoclave	1:50
Spp1/Osteopontin	IBL	18628	Rabbit polyclonal	20 min; microwave	1:25
Hmox1	Proteintech	10701-1-AP	Rabbit polyclonal	20 min; microwave	1:100
Lactoperoxidase	Proteintech	10376-1-AP	Rabbit polyclonal	20 min; microwave	1:100
Mmp12	Proteintech	22989-1-AP	Rabbit polyclonal	20 min; microwave	1:200
EGFR	CST	2232S	Rabbit polyclonal	20 min; microwave	1:25
ErbB2/Her2/NEU (clone 3B5)	santa cruz	sc-33684	Mouse monoclonal	20 min; microwave	1:25
Amphiregulin	Proteintech	16036-1-AP	Rabbit polyclonal	20 min; microwave	1:200
Anks1b	Proteintech	24783－1-AP	Rabbit polyclonal	20 min; microwave	1:200
