# Supplementary material for: Time-Course of Transcriptomic Change in the Lungs of F344 Rats Repeatedly Exposed to a Multiwalled Carbon Nanotube in a 2-Year Test
Source: Nanomaterials (Basel). 2023 Jul 19;13(14):2105. doi: 10.3390/nano13142105 (PMC10383707; doi:10.3390/nano13142105)
Supplement: Supplementary file 1 [file nanomaterials-13-02105-s001.zip › Table S3 All DEGs.xlsx]

## Sheet: Table S3a All DEGs (Y-0.5)
Table S3. All significantly differentially expressed genes (DEGs) in MWCNT-treated rat lungs at each time point
Table S3a. All DEGs in MWCNT-treated rat lungs at Year 0.5
Official Gene Symbol	Ensembl Gene ID	Log₂ fold change
RragB	ENSRNOG00000050535	9.31735
Spp1	ENSRNOG00000043451	8.97845
Zfp84_2	ENSRNOG00000046652	8.64972
Pla2g4e	ENSRNOG00000024904	8.36161
Ankrd34c	ENSRNOG00000013937	8.06428
Adamts18	ENSRNOG00000011575	7.92222
Impad1_1	ENSRNOG00000027079	7.78954
Tnf	ENSRNOG00000000837	7.08283
Mmp7	ENSRNOG00000010507	6.95496
LOC108348083/Aldh18a1	ENSRNOG00000015267	6.91004
Retnla	ENSRNOG00000001955	6.44326
Srd5a2	ENSRNOG00000027042	6.34026
Marco	ENSRNOG00000049303	6.24071
Mt3	ENSRNOG00000018958	6.05413
Yme1l1	ENSRNOG00000017100	5.83599
Mmp12	ENSRNOG00000030187	5.70836
Slc26a4	ENSRNOG00000058692	5.61578
Lpo	ENSRNOG00000008422	5.47193
AABR07035791.1	ENSRNOG00000049592	5.41174
Prlhr	ENSRNOG00000009922	5.40105
Nlrp6_1	ENSRNOG00000045677	5.32641
LOC103689999	ENSRNOG00000046051	5.27311
Gsg1	ENSRNOG00000008518	5.23183
Ccl1	ENSRNOG00000021851	5.18848
Mrgprx2	ENSRNOG00000033665	4.95512
Tmem72	ENSRNOG00000023340	4.91787
Scn10a	ENSRNOG00000032473	4.81867
Trh	ENSRNOG00000011824	4.71882
Psca	ENSRNOG00000061376	4.36848
Ctsk	ENSRNOG00000021155	4.35783
Scg2	ENSRNOG00000015055	4.31487
Grin3a	ENSRNOG00000005723	4.30447
Sctr	ENSRNOG00000049766	4.27742
Ptprn	ENSRNOG00000019587	4.26808
Kctd4	ENSRNOG00000050996	4.26214
A2m	ENSRNOG00000028896	4.22927
Ccl7	ENSRNOG00000000239	4.21559
Ccl9	ENSRNOG00000028548	4.20502
Klk13	ENSRNOG00000022353	4.1482
LOC100911615	ENSRNOG00000047551	4.12841
Mab21l3	ENSRNOG00000016044	4.12804
Itih1	ENSRNOG00000033386	4.0962
AABR07065782.1	ENSRNOG00000033376	4.0619
Atp6v0d2	ENSRNOG00000006926	4.04762
Tpsab1	ENSRNOG00000024181	3.95306
Vgf	ENSRNOG00000001416	3.88903
Calcb	ENSRNOG00000011074	3.8864
Slc18a1	ENSRNOG00000011992	3.87845
Cxcl6	ENSRNOG00000002843	3.84009
Ccl2	ENSRNOG00000007159	3.79366
Atp1a3	ENSRNOG00000020263	3.78014
Fcrlb	ENSRNOG00000003135	3.77735
Rgs9	ENSRNOG00000003800	3.706
Gjb6	ENSRNOG00000022116	3.68298
Tmc1	ENSRNOG00000051262	3.67766
Calca	ENSRNOG00000011130	3.60586
Slamf9	ENSRNOG00000008045	3.53966
Asic2	ENSRNOG00000058308	3.53515
AABR07034729.1	ENSRNOG00000042193	3.53386
Defb3	ENSRNOG00000038126	3.44795
Slc7a11	ENSRNOG00000010210	3.44715
Fstl4	ENSRNOG00000006565	3.44025
Snap91	ENSRNOG00000023861	3.42983
Cpne5	ENSRNOG00000000522	3.38879
Radx	ENSRNOG00000011120	3.36768
Cfi	ENSRNOG00000053400	3.31548
Padi1	ENSRNOG00000007067	3.31104
Tmprss9	ENSRNOG00000032429	3.30508
Il24	ENSRNOG00000004470	3.30088
1700066B19Rik	ENSRNOG00000039592	3.29593
Clec4a	ENSRNOG00000010045	3.29439
AABR07051678.1	ENSRNOG00000048541	3.28381
Cpa4	ENSRNOG00000010463	3.25878
Lrrtm4	ENSRNOG00000021938	3.20952
Lilrb3	ENSRNOG00000046683	3.19153
Rspo3	ENSRNOG00000011568	3.18814
Dmgdh	ENSRNOG00000023588	3.16525
Tm4sf19	ENSRNOG00000001757	3.149
Wnt10a	ENSRNOG00000052510	3.12528
Prmt8	ENSRNOG00000053804	3.12189
Agtr2	ENSRNOG00000050006	3.11997
Fabp4	ENSRNOG00000010805	3.07571
LOC689757	ENSRNOG00000037076	3.06923
Gpr84	ENSRNOG00000036834	3.06722
Rhbdl2	ENSRNOG00000026592	3.06208
AABR07065768.2	ENSRNOG00000054688	3.0619
Gpnmb	ENSRNOG00000008816	3.05768
Accsl	ENSRNOG00000042533	3.05721
Mreg	ENSRNOG00000015774	3.05276
Fcgr2b	ENSRNOG00000046452	3.04091
Gja3	ENSRNOG00000008847	3.03335
Il6	ENSRNOG00000010278	3.02826
AABR07067023.1	ENSRNOG00000058742	3.02388
Ccl12	ENSRNOG00000029768	2.99233
Fcrl2	ENSRNOG00000016164	2.99143
Tspan11	ENSRNOG00000054360	2.98426
LOC100909700	ENSRNOG00000048783	2.96485
Cadm4	ENSRNOG00000024243	2.89412
Rab7b	ENSRNOG00000039754	2.89048
Slc37a2	ENSRNOG00000039390	2.88043
Rasgrf1	ENSRNOG00000014025	2.87624
AABR07034718.1	ENSRNOG00000047658	2.87377
Tnfsf9	ENSRNOG00000045595	2.87002
AABR07065821.1	ENSRNOG00000050561	2.8673
Sectm1a	ENSRNOG00000036672	2.85515
Kif14	ENSRNOG00000037211	2.84623
Lcn2	ENSRNOG00000013973	2.84286
AABR07034730.2	ENSRNOG00000050898	2.83655
AABR07060980.1	ENSRNOG00000056052	2.82853
Dntt	ENSRNOG00000013615	2.80732
AABR07065688.1	ENSRNOG00000055807	2.80206
Tph1	ENSRNOG00000011672	2.79505
Galr3	ENSRNOG00000027060	2.78583
Mylk2	ENSRNOG00000008235	2.7838
Cd177	ENSRNOG00000022669	2.75799
C6	ENSRNOG00000024115	2.75237
Ccr8	ENSRNOG00000026759	2.75219
Folr2	ENSRNOG00000019890	2.74821
Pax8	ENSRNOG00000026203	2.74334
Serpine2	ENSRNOG00000015461	2.73562
Slc6a12	ENSRNOG00000013547	2.72797
Smtnl1	ENSRNOG00000007516	2.7246
Sez6l2	ENSRNOG00000027098	2.70247
Dok5	ENSRNOG00000013196	2.6755
Gas2l3	ENSRNOG00000025198	2.66162
Areg	ENSRNOG00000002754	2.66015
Diras1	ENSRNOG00000029738	2.60511
Cdh17	ENSRNOG00000015562	2.60484
Ccl22	ENSRNOG00000016535	2.60477
Tmem59l	ENSRNOG00000022432	2.5944
Tub	ENSRNOG00000046566	2.58863
Thbs2	ENSRNOG00000010529	2.58524
Exo1	ENSRNOG00000056209	2.5843
Galnt5	ENSRNOG00000004645	2.57638
Mc5r	ENSRNOG00000016685	2.56056
Irgc	ENSRNOG00000024257	2.56055
Steap3	ENSRNOG00000049471	2.54599
Ptchd1	ENSRNOG00000003675	2.54066
Gcgr	ENSRNOG00000036692	2.52615
Sfrp5	ENSRNOG00000014940	2.51579
Hk3	ENSRNOG00000026235	2.50766
AABR07061005.2	ENSRNOG00000059007	2.50496
Bpifb1	ENSRNOG00000015468	2.49462
AABR07065789.3	ENSRNOG00000058824	2.49039
Chia	ENSRNOG00000033162	2.48741
AABR07034730.3	ENSRNOG00000057165	2.47301
C4bpa	ENSRNOG00000004062	2.46801
Ccn4	ENSRNOG00000007078	2.46047
Rgs1	ENSRNOG00000003895	2.46022
Fat2	ENSRNOG00000012575	2.45623
Serpine1	ENSRNOG00000001414	2.44682
Pigz_1	ENSRNOG00000047384	2.44661
Izumo1r	ENSRNOG00000019894	2.44357
Cd68	ENSRNOG00000037563	2.43918
Card14	ENSRNOG00000047367	2.43758
Slc36a3	ENSRNOG00000021310	2.43546
AABR07065814.2	ENSRNOG00000042319	2.42526
Matk	ENSRNOG00000020431	2.41872
Prss22	ENSRNOG00000039698	2.40229
Cd5l	ENSRNOG00000023068	2.39415
Lilrb4	ENSRNOG00000027811	2.38801
Duox1	ENSRNOG00000033348	2.37642
LOC103689942	ENSRNOG00000050105	2.37591
Il1rn	ENSRNOG00000005871	2.36566
Crtac1	ENSRNOG00000015220	2.36476
Tnn	ENSRNOG00000002548	2.36379
Ank1	ENSRNOG00000018241	2.3615
Bpifb5	ENSRNOG00000025238	2.3594
Itgam	ENSRNOG00000019728	2.35817
Aunip	ENSRNOG00000022030	2.33231
Cpa3	ENSRNOG00000011181	2.31253
B3gnt3	ENSRNOG00000018764	2.31072
Kcnc4	ENSRNOG00000060988	2.30705
AABR07065823.3	ENSRNOG00000050708	2.30368
Esr1	ENSRNOG00000019358	2.29196
AABR07065837.1	ENSRNOG00000055375	2.28384
Pla2g7	ENSRNOG00000025691	2.27843
LOC100911796	ENSRNOG00000050743	2.27789
Depdc1	ENSRNOG00000009503	2.27319
Ubd	ENSRNOG00000000768	2.27109
Vtcn1	ENSRNOG00000015279	2.26198
Shcbp1	ENSRNOG00000053026	2.25842
RGD1305807	ENSRNOG00000010497	2.25391
Eno2	ENSRNOG00000013141	2.24977
Abca6	ENSRNOG00000046890	2.24914
LOC103690070	ENSRNOG00000029029	2.24727
Tiam1	ENSRNOG00000021569	2.24502
Mcpt1l1	ENSRNOG00000053494	2.24341
Pigz_2	ENSRNOG00000047082	2.24204
Tmem45b	ENSRNOG00000008515	2.23742
Itgb8	ENSRNOG00000006569	2.23378
Snorc	ENSRNOG00000016606	2.22919
Cd300lb	ENSRNOG00000036728	2.22504
Prkar1b	ENSRNOG00000028733	2.22048
Qprt	ENSRNOG00000016980	2.21721
Aqp3	ENSRNOG00000009797	2.21018
Lgals3	ENSRNOG00000010645	2.20694
Ptprv	ENSRNOG00000005277	2.19887
Fermt1	ENSRNOG00000021274	2.19662
Syt13	ENSRNOG00000008000	2.19251
AABR07051684.1	ENSRNOG00000048182	2.1813
AABR07034739.1	ENSRNOG00000050000	2.18051
Cpb2	ENSRNOG00000010935	2.17975
Siglec1	ENSRNOG00000021243	2.17759
AABR07061134.1	ENSRNOG00000061431	2.17654
Tpsb2	ENSRNOG00000018611	2.16866
Slc47a1	ENSRNOG00000057404	2.16839
Adora1	ENSRNOG00000003442	2.16782
Ect2	ENSRNOG00000024365	2.16402
AABR07065834.1	ENSRNOG00000048384	2.16333
Kcnn4	ENSRNOG00000019440	2.1511
Sel1l3	ENSRNOG00000004932	2.13826
Ska1	ENSRNOG00000015275	2.13407
C1qa	ENSRNOG00000012807	2.13386
Ccl17	ENSRNOG00000016278	2.13286
Slc2a5	ENSRNOG00000017693	2.13103
C3	ENSRNOG00000046834	2.13096
Slamf8	ENSRNOG00000008736	2.12709
Fam111a	ENSRNOG00000012067	2.12643
Ccl3	ENSRNOG00000011205	2.12054
Slco4a1	ENSRNOG00000053430	2.1192
AABR07060886.1	ENSRNOG00000047464	2.11894
Syp	ENSRNOG00000059720	2.11595
Tnfrsf4	ENSRNOG00000020106	2.1148
Adora3	ENSRNOG00000015788	2.11146
Mastl	ENSRNOG00000054474	2.11113
Bhlhe41	ENSRNOG00000048961	2.10631
Cd84	ENSRNOG00000022884	2.0995
AABR07051551.1	ENSRNOG00000048167	2.09858
Chi3l1	ENSRNOG00000053272	2.09184
Clec4e	ENSRNOG00000061394	2.08721
LOC299282	ENSRNOG00000010478	2.07709
Cd86	ENSRNOG00000038835	2.06582
Cldn6	ENSRNOG00000003648	2.05915
Ptges	ENSRNOG00000006320	2.05295
Capg	ENSRNOG00000013668	2.05255
AABR07065768.1	ENSRNOG00000050944	2.03173
Slc7a7	ENSRNOG00000010296	2.03092
Cgref1	ENSRNOG00000007923	2.0279
Hjurp	ENSRNOG00000022911	2.02717
Acsbg1	ENSRNOG00000011381	2.02641
Cdca3	ENSRNOG00000015529	2.02232
Pimreg	ENSRNOG00000008040	2.01924
Sh2d1b	ENSRNOG00000031599	2.01536
Cxcl11	ENSRNOG00000022298	2.00903
Cftr	ENSRNOG00000055103	2.00521
C4bpb	ENSRNOG00000004125	2.00323
Bcat1	ENSRNOG00000015514	2.00313
Clec5a	ENSRNOG00000026306	1.9973
Ereg	ENSRNOG00000002771	1.99183
RGD1565367	ENSRNOG00000026919	1.98946
Cybb	ENSRNOG00000003622	1.98277
Anln	ENSRNOG00000014343	1.98252
Hp	ENSRNOG00000014964	1.9708
Meis3	ENSRNOG00000021390	1.96452
Ptafr	ENSRNOG00000013231	1.9597
Serpina10	ENSRNOG00000048988	1.94628
Sapcd2	ENSRNOG00000013069	1.94412
AABR07027451.1	ENSRNOG00000046284	1.94054
Rnase9	ENSRNOG00000029516	1.9387
Pram1	ENSRNOG00000039204	1.93704
Ms4a4a	ENSRNOG00000045611	1.93371
Myom3	ENSRNOG00000032994	1.93234
Daam2	ENSRNOG00000053945	1.93218
RGD1559482	ENSRNOG00000048771	1.92351
Ccna2	ENSRNOG00000015423	1.92104
Pclaf	ENSRNOG00000016561	1.91885
AABR07065815.1	ENSRNOG00000048062	1.9185
AABR07065886.1	ENSRNOG00000046401	1.91586
Myo5a	ENSRNOG00000058866	1.91374
Asf1b	ENSRNOG00000005115	1.91224
Noxo1	ENSRNOG00000025117	1.909
Dhrs9	ENSRNOG00000058568	1.90833
Mcoln3	ENSRNOG00000015024	1.90744
AABR07065789.1	ENSRNOG00000006333	1.90364
Them5	ENSRNOG00000043445	1.8956
Mcm10	ENSRNOG00000017981	1.8922
Arl11	ENSRNOG00000014653	1.88917
Pla2g1b	ENSRNOG00000001153	1.8863
Glis1	ENSRNOG00000000138	1.88592
Itgax	ENSRNOG00000036703	1.88114
Ckap2	ENSRNOG00000024650	1.878
Tgfbr1	ENSRNOG00000007036	1.87637
Ccne1	ENSRNOG00000014786	1.87335
Cdc6	ENSRNOG00000027787	1.87302
Serpinf2	ENSRNOG00000003233	1.87124
Traip	ENSRNOG00000030101	1.8688
LOC103689965	ENSRNOG00000000443	1.86227
Dscam	ENSRNOG00000027992	1.85697
LOC497796	ENSRNOG00000060241	1.8495
Smpdl3a	ENSRNOG00000000815	1.84804
Pttg1	ENSRNOG00000003802	1.84244
Cxcl2	ENSRNOG00000002792	1.83738
AABR07065699.1	ENSRNOG00000050102	1.83453
Zbtb16	ENSRNOG00000029980	1.83227
Scimp	ENSRNOG00000037409	1.83169
C1qb	ENSRNOG00000012749	1.83129
Fetub	ENSRNOG00000001806	1.82823
Bub1b	ENSRNOG00000007906	1.82801
Aoc1	ENSRNOG00000008575	1.82698
Trem2	ENSRNOG00000013578	1.82651
Tmprss4	ENSRNOG00000026650	1.82626
AABR07065815.2	ENSRNOG00000050143	1.82444
Slc13a2	ENSRNOG00000010337	1.81862
Pbk	ENSRNOG00000015308	1.81708
Bard1	ENSRNOG00000014960	1.81537
Ly6i	ENSRNOG00000007137	1.81533
Vsig2	ENSRNOG00000033490	1.81492
Ttk	ENSRNOG00000029055	1.81345
Cd14	ENSRNOG00000017819	1.81008
AABR07060963.2	ENSRNOG00000055428	1.80945
Bhlha15	ENSRNOG00000025164	1.80872
LOC690813	ENSRNOG00000048070	1.80776
Fabp5	ENSRNOG00000049075	1.8038
Gcsam	ENSRNOG00000022110	1.80335
Duoxa1	ENSRNOG00000018005	1.79647
C5	ENSRNOG00000018899	1.79401
AABR07065645.2	ENSRNOG00000047785	1.78381
Foxa3	ENSRNOG00000014256	1.78253
Wnt7b	ENSRNOG00000015750	1.77888
Espl1	ENSRNOG00000012835	1.77814
AABR07065699.5	ENSRNOG00000058753	1.77803
Snai3	ENSRNOG00000013586	1.77609
AABR07058918.1	ENSRNOG00000053703	1.77593
Ms4a6a	ENSRNOG00000020991	1.76894
Rrm2	ENSRNOG00000054286	1.76367
Ttyh2	ENSRNOG00000024578	1.76338
Clcn4	ENSRNOG00000003533	1.76087
Myo7a	ENSRNOG00000013641	1.75978
Mc2r	ENSRNOG00000016681	1.75822
Cd200r1	ENSRNOG00000039048	1.75573
Lgmn	ENSRNOG00000007089	1.75401
Tmem171	ENSRNOG00000015449	1.7476
Ankle1	ENSRNOG00000017156	1.74515
Chaf1b	ENSRNOG00000001692	1.74216
Ctla4	ENSRNOG00000054129	1.74206
Susd1	ENSRNOG00000056819	1.74202
Ptx3	ENSRNOG00000012280	1.73985
Rassf4	ENSRNOG00000013526	1.73918
Plaur	ENSRNOG00000037931	1.73777
LOC690097	ENSRNOG00000058993	1.7322
Apoe	ENSRNOG00000018454	1.72919
Ctsz	ENSRNOG00000050697	1.72732
Tbxas1	ENSRNOG00000007918	1.72677
Kif2c	ENSRNOG00000019100	1.72347
AABR07060994.1	ENSRNOG00000060746	1.72233
Cenpi	ENSRNOG00000033335	1.71805
Cep55	ENSRNOG00000016377	1.71751
Nusap1	ENSRNOG00000004921	1.71307
RGD1307182	ENSRNOG00000042230	1.71221
Xcr1	ENSRNOG00000006620	1.71034
E2f8	ENSRNOG00000022537	1.70803
Melk	ENSRNOG00000013598	1.70517
Tlr12	ENSRNOG00000042455	1.70401
Pld3	ENSRNOG00000018390	1.70343
Ndc80	ENSRNOG00000013727	1.70141
Osm	ENSRNOG00000024390	1.70096
Trem3	ENSRNOG00000013748	1.6967
Scn4a	ENSRNOG00000012134	1.6943
Acta1	ENSRNOG00000017786	1.693
Kif11	ENSRNOG00000056069	1.69261
Slc28a2	ENSRNOG00000028668	1.69169
Adamts4	ENSRNOG00000003538	1.69096
Ccnb1	ENSRNOG00000058539	1.69013
RT1-DMa	ENSRNOG00000047854	1.68905
Kntc1	ENSRNOG00000033658	1.68809
Kcnk13	ENSRNOG00000047363	1.68642
Muc1	ENSRNOG00000020539	1.6864
RGD1565617_1	ENSRNOG00000047836	1.68405
Trim36	ENSRNOG00000016612	1.68311
Prokr1	ENSRNOG00000009556	1.68303
Itih4	ENSRNOG00000017381	1.68082
Baalc	ENSRNOG00000004697	1.67906
AABR07032097.1	ENSRNOG00000019744	1.67886
Tnip3	ENSRNOG00000054524	1.67712
Ctss	ENSRNOG00000021157	1.67605
Rtn4rl2	ENSRNOG00000021513	1.67563
Cdk1	ENSRNOG00000000632	1.67474
Inhba	ENSRNOG00000014320	1.67285
Gpr34	ENSRNOG00000039759	1.67192
Gpr183	ENSRNOG00000025094	1.66601
Plk1	ENSRNOG00000018815	1.66457
Rad51	ENSRNOG00000037302	1.66426
Il1r2	ENSRNOG00000014378	1.66228
Olr1	ENSRNOG00000056219	1.65727
Tnfrsf9	ENSRNOG00000036942	1.65693
Nipsnap3b	ENSRNOG00000010332	1.65366
Cip2a	ENSRNOG00000039183	1.65311
Ddias	ENSRNOG00000022521	1.65206
Adora2b	ENSRNOG00000002922	1.65073
Lat2	ENSRNOG00000021856	1.64981
Iqgap3	ENSRNOG00000027894	1.64384
LOC100359539	ENSRNOG00000008450	1.64333
Cenpu	ENSRNOG00000022261	1.64306
Clec4a3	ENSRNOG00000010018	1.64001
Kif20b	ENSRNOG00000018929	1.63894
Clec12a	ENSRNOG00000054860	1.63742
Diaph3	ENSRNOG00000008986	1.63699
Trem1	ENSRNOG00000022859	1.63697
Nrcam	ENSRNOG00000004067	1.6361
Ticrr	ENSRNOG00000015520	1.63473
Cd33	ENSRNOG00000037331	1.6335
C5ar1	ENSRNOG00000047800	1.63203
Ckap2l	ENSRNOG00000026143	1.63067
Enpp3	ENSRNOG00000013791	1.62832
Dtl	ENSRNOG00000004195	1.62571
Cdca5	ENSRNOG00000046635	1.62561
Unc5cl	ENSRNOG00000046601	1.62298
Nuf2	ENSRNOG00000002711	1.61928
Mafb	ENSRNOG00000016037	1.61856
Rell2	ENSRNOG00000019575	1.61806
Igf1	ENSRNOG00000004517	1.61573
AABR07065792.1	ENSRNOG00000042197	1.61521
Pappa1	ENSRNOG00000033527	1.61459
Col16a1	ENSRNOG00000031475	1.61419
Npc2	ENSRNOG00000012062	1.61416
Csf2ra	ENSRNOG00000049782	1.60951
E2f7	ENSRNOG00000026252	1.60856
AABR07065827.1	ENSRNOG00000049315	1.60727
Acp5	ENSRNOG00000046261	1.60564
AC141959.1	ENSRNOG00000028545	1.60132
Cenpe	ENSRNOG00000009339	1.60089
Mki67	ENSRNOG00000028137	1.59652
Ctsh	ENSRNOG00000014064	1.59618
Ifi30	ENSRNOG00000019387	1.59509
C1qc	ENSRNOG00000012804	1.59015
Top2a	ENSRNOG00000053047	1.5849
Slc9a7	ENSRNOG00000004150	1.58244
Sgo2	ENSRNOG00000027035	1.5821
Foxp3	ENSRNOG00000011702	1.58174
Gm2a	ENSRNOG00000052219	1.58153
Cd80	ENSRNOG00000001527	1.57943
Cldn4	ENSRNOG00000001476	1.57862
Prdx5	ENSRNOG00000021125	1.57824
Batf	ENSRNOG00000008588	1.57824
Fam20c	ENSRNOG00000001314	1.57687
Ncapg	ENSRNOG00000038572	1.57596
C4a	ENSRNOG00000047657	1.57522
Pkib	ENSRNOG00000000811	1.57458
Bub1	ENSRNOG00000032778	1.57296
Tmem86a	ENSRNOG00000013663	1.57235
Rnaset2	ENSRNOG00000013190	1.57086
Gjb1	ENSRNOG00000003746	1.57026
Fcgr2a	ENSRNOG00000046663	1.56974
Hvcn1	ENSRNOG00000001270	1.56858
Ccnf	ENSRNOG00000007483	1.56855
Kcnj13	ENSRNOG00000016057	1.56771
Slc4a5	ENSRNOG00000010378	1.56722
Slc41a2	ENSRNOG00000008713	1.56518
Cks2	ENSRNOG00000014130	1.56321
Fam83e	ENSRNOG00000021039	1.56248
Emilin2	ENSRNOG00000014837	1.56199
Xylt1	ENSRNOG00000056658	1.56098
Csf2rb	ENSRNOG00000000187	1.55561
Tuba1c	ENSRNOG00000021438	1.55362
Mfsd2a	ENSRNOG00000014008	1.55009
F3	ENSRNOG00000011800	1.54451
Troap	ENSRNOG00000060703	1.54412
Cd300le	ENSRNOG00000042825	1.54401
AABR07065750.2	ENSRNOG00000050118	1.54279
Hmox1	ENSRNOG00000014117	1.54034
Tmem132c	ENSRNOG00000000963	1.53902
Havcr2	ENSRNOG00000031443	1.53447
RT1-Bb	ENSRNOG00000032708	1.53267
Spag5_2	ENSRNOG00000011777	1.53211
Blnk	ENSRNOG00000013967	1.53121
Msr1	ENSRNOG00000012779	1.5276
Gch1	ENSRNOG00000011039	1.52734
Clec10a	ENSRNOG00000018715	1.52616
Hpx	ENSRNOG00000018257	1.52326
C3ar1	ENSRNOG00000009211	1.5219
Angptl1	ENSRNOG00000004712	1.52138
Tpx2	ENSRNOG00000008165	1.52123
Serpinb8	ENSRNOG00000002396	1.50937
Atp8a1	ENSRNOG00000034200	1.5073
Cd300a	ENSRNOG00000057058	1.50686
Pdcd1	ENSRNOG00000019043	1.5056
P2ry13	ENSRNOG00000029756	1.50482
Cdkn3	ENSRNOG00000009785	1.50463
Hk2	ENSRNOG00000006116	1.50291
Mcm5	ENSRNOG00000014336	1.50281
P2ry2	ENSRNOG00000019283	1.50251
Ms4a7	ENSRNOG00000020953	1.50142
Lyc2	ENSRNOG00000034139	1.50075
Cd83	ENSRNOG00000018092	1.50059
Sftpa1	ENSRNOG00000011438	1.49875
C2	ENSRNOG00000051235	1.49725
Slc7a2	ENSRNOG00000011016	1.4969
Thbs1	ENSRNOG00000045829	1.49576
Ptger2	ENSRNOG00000050968	1.4946
Rmdn2	ENSRNOG00000006082	1.49333
Racgap1	ENSRNOG00000049033	1.48948
Sap30	ENSRNOG00000013218	1.48849
LOC108348139	ENSRNOG00000051002	1.48689
Tlcd4	ENSRNOG00000025160	1.48675
Ncf1	ENSRNOG00000001480	1.48661
Cxcl10	ENSRNOG00000022256	1.4857
Trim46	ENSRNOG00000055433	1.48561
Atp1b1	ENSRNOG00000002934	1.48445
Pf4	ENSRNOG00000028015	1.4794
Arhgap11a	ENSRNOG00000008115	1.47809
Bcl2a1	ENSRNOG00000047606	1.47539
Card9	ENSRNOG00000051470	1.4733
Aff2	ENSRNOG00000052572	1.47218
Elf3	ENSRNOG00000006330	1.46953
Soat1	ENSRNOG00000004111	1.46769
C2cd4d	ENSRNOG00000020832	1.46707
Sh3pxd2b	ENSRNOG00000004063	1.46584
AABR07014974.1	ENSRNOG00000052298	1.46577
Tfec	ENSRNOG00000061595	1.46353
Atp6v1b2	ENSRNOG00000011891	1.46255
Fasn	ENSRNOG00000045636	1.46235
Nog	ENSRNOG00000023683	1.45991
Ncaph	ENSRNOG00000012051	1.45895
Mnda	ENSRNOG00000003486	1.45854
Sting1	ENSRNOG00000042137	1.45744
Fam3b	ENSRNOG00000001962	1.45698
Ctsd	ENSRNOG00000020206	1.45457
Epha7	ENSRNOG00000007030	1.45371
Sh2b2	ENSRNOG00000001425	1.44989
Tubb2b	ENSRNOG00000017445	1.44854
Qsox1	ENSRNOG00000003649	1.44742
AABR07065693.3	ENSRNOG00000056285	1.44349
Tmem163	ENSRNOG00000003769	1.443
Sod2	ENSRNOG00000019048	1.44138
Sdf2l1	ENSRNOG00000001859	1.44008
Igh-6	ENSRNOG00000048402	1.44008
Plbd1	ENSRNOG00000008933	1.43931
Ttc9	ENSRNOG00000007254	1.43737
Dusp4	ENSRNOG00000011921	1.43247
Rnf150	ENSRNOG00000003479	1.43056
Ube2c	ENSRNOG00000015131	1.43038
Fanca	ENSRNOG00000016706	1.42985
Sfn	ENSRNOG00000033153	1.42814
Kif5a	ENSRNOG00000005299	1.42502
Gem	ENSRNOG00000015160	1.42497
Trpv2	ENSRNOG00000003104	1.42245
Lrp2	ENSRNOG00000056184	1.4217
Slc16a3	ENSRNOG00000036677	1.4213
Hmmr	ENSRNOG00000059894	1.42012
Gins1	ENSRNOG00000008091	1.4192
Ctsb	ENSRNOG00000010331	1.41765
Ptcd3	ENSRNOG00000009484	1.41722
Susd3	ENSRNOG00000016525	1.41671
Mmp14	ENSRNOG00000010947	1.41668
Cyp2d3	ENSRNOG00000029179	1.41571
Clec4a2	ENSRNOG00000030012	1.41543
AABR07063279.1	ENSRNOG00000051056	1.41377
Cpxm2	ENSRNOG00000015902	1.41314
RT1-DMb	ENSRNOG00000049491	1.41201
Tmem176a	ENSRNOG00000023708	1.41038
Icos	ENSRNOG00000046196	1.41027
Vcan	ENSRNOG00000029212	1.4087
Kif18b	ENSRNOG00000021713	1.40845
Dusp9	ENSRNOG00000055185	1.40773
Frrs1	ENSRNOG00000016351	1.40599
Tlr5	ENSRNOG00000022067	1.40435
Aspm	ENSRNOG00000012318	1.40281
Tnfrsf12a	ENSRNOG00000003546	1.40067
Otulinl	ENSRNOG00000012109	1.39967
P2ry6	ENSRNOG00000019270	1.39579
Stap1	ENSRNOG00000002014	1.39207
AABR07061001.1	ENSRNOG00000051739	1.39115
S100a9	ENSRNOG00000011483	1.39045
Dusp2	ENSRNOG00000013862	1.39022
Pik3r5	ENSRNOG00000023428	1.38668
Tlr11	ENSRNOG00000032368	1.38438
Cfb_1	ENSRNOG00000000419	1.38366
Uhrf1	ENSRNOG00000048411	1.38348
Knstrn	ENSRNOG00000009334	1.37719
Pirb	ENSRNOG00000058422	1.37606
Oma1	ENSRNOG00000007214	1.37545
Ccr5	ENSRNOG00000049115	1.37481
Galc	ENSRNOG00000003759	1.37422
Ulbp1	ENSRNOG00000061316	1.37354
Mroh2a	ENSRNOG00000042182	1.37347
Mitf	ENSRNOG00000008658	1.36617
Entpd3	ENSRNOG00000018982	1.36559
Itgb2	ENSRNOG00000001224	1.36231
Mt2A	ENSRNOG00000043098	1.36212
Grn	ENSRNOG00000021031	1.36155
Brms1l_1	ENSRNOG00000008249	1.36028
Rimkla	ENSRNOG00000008625	1.35903
AABR07039446.2	ENSRNOG00000061403	1.35826
Apobec1	ENSRNOG00000015411	1.35822
RT1-Db1	ENSRNOG00000033215	1.35711
Osbpl8	ENSRNOG00000026962	1.35414
Arhgap22	ENSRNOG00000024728	1.3538
Ccl4	ENSRNOG00000011406	1.35318
LOC108348047	ENSRNOG00000049422	1.35121
Knl1	ENSRNOG00000060100	1.351
Dsc2	ENSRNOG00000039969	1.347
Lipa	ENSRNOG00000019077	1.34621
Cotl1	ENSRNOG00000016257	1.34499
Sult2b1	ENSRNOG00000021046	1.34104
Klra5	ENSRNOG00000062297	1.34082
Rarres1	ENSRNOG00000037853	1.34025
Oscar	ENSRNOG00000055716	1.33561
RT1-Da	ENSRNOG00000032844	1.33511
Cenpa	ENSRNOG00000032178	1.3344
AABR07051708.1	ENSRNOG00000054828	1.33364
AABR07028352.1	ENSRNOG00000018113	1.33338
Slc11a1	ENSRNOG00000014956	1.33232
Clec4a1	ENSRNOG00000042139	1.33181
Fxyd2	ENSRNOG00000016469	1.33164
Cldn10	ENSRNOG00000010085	1.32947
Acsl4	ENSRNOG00000019180	1.32769
AABR07070117.1	ENSRNOG00000059851	1.32592
Txnrd3	ENSRNOG00000059810	1.32358
Mis18bp1	ENSRNOG00000023093	1.31987
Vill	ENSRNOG00000011446	1.31932
Cysltr1	ENSRNOG00000037845	1.31772
Asgr2	ENSRNOG00000030726	1.31682
Dsg3	ENSRNOG00000016632	1.31622
Parvg	ENSRNOG00000052064	1.31405
Sftpd	ENSRNOG00000056001	1.31209
Tc2n	ENSRNOG00000004754	1.31127
Lyz2	ENSRNOG00000005825	1.31116
Cd74	ENSRNOG00000018735	1.311
Fxyd5	ENSRNOG00000021062	1.31059
Jchain	ENSRNOG00000003666	1.30931
Apobr	ENSRNOG00000017403	1.30862
Serinc2	ENSRNOG00000012989	1.30678
Chst1	ENSRNOG00000007989	1.30324
Dpp7	ENSRNOG00000012640	1.30306
Slamf6	ENSRNOG00000038286	1.30215
Prcp	ENSRNOG00000010630	1.30199
Prc1	ENSRNOG00000013057	1.30054
Lrrn4cl	ENSRNOG00000026302	1.29866
Adra2a	ENSRNOG00000047545	1.29654
Malt1	ENSRNOG00000017181	1.29575
Drp2	ENSRNOG00000026704	1.29491
Cd53	ENSRNOG00000017874	1.2922
Mcoln2	ENSRNOG00000015089	1.29153
Vwa7	ENSRNOG00000000860	1.29114
LOC108348048	ENSRNOG00000000195	1.29093
Edil3	ENSRNOG00000033064	1.2886
Gk	ENSRNOG00000034116	1.28727
Kifc1	ENSRNOG00000000479	1.28474
Gusb	ENSRNOG00000000913	1.28416
Fkbp5	ENSRNOG00000022523	1.2819
Dscc1	ENSRNOG00000026502	1.27984
Ros1	ENSRNOG00000000406	1.27169
Stom	ENSRNOG00000019147	1.27143
Tectb	ENSRNOG00000015671	1.27074
Plau	ENSRNOG00000010516	1.27059
RGD1560455	ENSRNOG00000037838	1.26865
Mrc1	ENSRNOG00000018251	1.26523
AABR07060872.1	ENSRNOG00000049829	1.26308
Slc7a5	ENSRNOG00000018824	1.25968
Pcsk1	ENSRNOG00000011107	1.2579
Chac1	ENSRNOG00000014387	1.25767
Pigr	ENSRNOG00000004405	1.25403
Fcgr1a	ENSRNOG00000021199	1.25131
Slc6a20	ENSRNOG00000006010	1.2502
Irf4	ENSRNOG00000061070	1.24987
Ocstamp	ENSRNOG00000019110	1.24898
RT1-Ba	ENSRNOG00000000451	1.24814
Lamp3	ENSRNOG00000022792	1.24722
AABR07060963.3	ENSRNOG00000059176	1.24532
Ciita	ENSRNOG00000002659	1.24437
Stil	ENSRNOG00000057760	1.24028
Tpbgl	ENSRNOG00000017922	1.23996
Pip5k1b	ENSRNOG00000015232	1.23883
Esco2	ENSRNOG00000015921	1.23775
Cadps	ENSRNOG00000008570	1.23606
C4b	ENSRNOG00000030729	1.23438
Kif22	ENSRNOG00000020281	1.23026
Tk1	ENSRNOG00000047314	1.23015
Gabrr2	ENSRNOG00000007490	1.22913
Mfsd11	ENSRNOG00000000247	1.22746
Rhbg	ENSRNOG00000019412	1.22736
Dnajc22	ENSRNOG00000053498	1.22591
Il18bp	ENSRNOG00000020150	1.22549
Sfta2	ENSRNOG00000048987	1.22447
Gna15	ENSRNOG00000005378	1.22072
Grin2c	ENSRNOG00000003280	1.22068
Chdh	ENSRNOG00000015859	1.21949
Igsf8	ENSRNOG00000007604	1.21945
Birc5	ENSRNOG00000050819	1.21627
gene:ENSRNOG00000034190	ENSRNOG00000034190	1.21556
Slc49a3	ENSRNOG00000023937	1.21418
Cdca2	ENSRNOG00000025302	1.21352
Slc7a1	ENSRNOG00000000924	1.21181
Lrrc25	ENSRNOG00000022565	1.21158
Wdfy4	ENSRNOG00000029662	1.21128
Ly86	ENSRNOG00000000137	1.20921
Sgpl1	ENSRNOG00000000565	1.20731
Hdac9	ENSRNOG00000004158	1.20577
Cyba	ENSRNOG00000013014	1.20541
Arg1	ENSRNOG00000013304	1.2045
Gpr137b	ENSRNOG00000002480	1.20436
Tlr8	ENSRNOG00000045992	1.20417
Tmem176b	ENSRNOG00000008465	1.20168
Slamf7	ENSRNOG00000023209	1.20119
Pdzk1ip1	ENSRNOG00000008161	1.20011
Kcnh4	ENSRNOG00000018790	1.19906
Gas7	ENSRNOG00000049361	1.19879
Disp2	ENSRNOG00000026787	1.19629
Strip2	ENSRNOG00000057729	1.19571
AABR07051583.1	ENSRNOG00000050066	1.19329
Ercc6l	ENSRNOG00000003208	1.19055
Slc25a13	ENSRNOG00000009957	1.18527
Sgms2	ENSRNOG00000011284	1.1819
Slc16a6	ENSRNOG00000000245	1.18112
Scn3b	ENSRNOG00000057221	1.1793
Ddhd1	ENSRNOG00000009481	1.17854
Cd4	ENSRNOG00000016294	1.17558
Rab32	ENSRNOG00000014258	1.17534
Pim1	ENSRNOG00000000529	1.17009
Bhlhe40	ENSRNOG00000007152	1.16884
Cdc20	ENSRNOG00000028415	1.16616
Brms1l_2	ENSRNOG00000051077	1.16614
Slc16a14	ENSRNOG00000017072	1.1642
Egfl6	ENSRNOG00000004275	1.16214
C2cd4b	ENSRNOG00000009106	1.16057
Cxcl1	ENSRNOG00000002802	1.15967
Pfkfb2	ENSRNOG00000004162	1.15843
Rhou	ENSRNOG00000053560	1.15567
Gaa	ENSRNOG00000047656	1.15486
Rab39a	ENSRNOG00000009008	1.15448
Gpr68	ENSRNOG00000046309	1.1536
Mybl2	ENSRNOG00000007805	1.14936
Cdca8	ENSRNOG00000031431	1.14728
Mfsd12	ENSRNOG00000039858	1.1456
Sema4a	ENSRNOG00000019737	1.14477
Cd63	ENSRNOG00000007650	1.14463
Cthrc1	ENSRNOG00000004578	1.14457
Ch25h	ENSRNOG00000019141	1.14201
Obsl1	ENSRNOG00000015346	1.14093
Gpr65	ENSRNOG00000003806	1.13998
Fnip2	ENSRNOG00000027833	1.13739
Sbk1	ENSRNOG00000057696	1.13594
Pkmyt1	ENSRNOG00000003657	1.13572
Ctsa	ENSRNOG00000015857	1.13534
Amdhd2	ENSRNOG00000006460	1.1341
Lilra5	ENSRNOG00000027808	1.13379
Fanci	ENSRNOG00000016689	1.13277
LOC685048	ENSRNOG00000049331	1.13252
LOC103689977	ENSRNOG00000052613	1.13201
Clec4d	ENSRNOG00000010181	1.13153
B3gnt7	ENSRNOG00000018267	1.13144
Slc26a11	ENSRNOG00000030537	1.12941
E2f3	ENSRNOG00000029273	1.12485
RGD1565785	ENSRNOG00000003748	1.12459
Trip13	ENSRNOG00000015810	1.12226
Plxnc1	ENSRNOG00000007970	1.12081
Cstb	ENSRNOG00000001201	1.11687
Spi1	ENSRNOG00000012172	1.11648
Irf5	ENSRNOG00000007437	1.11566
Defb4	ENSRNOG00000013939	1.11469
Tcp11l1	ENSRNOG00000042576	1.11312
Sidt2	ENSRNOG00000017871	1.11206
Cst7	ENSRNOG00000006767	1.11116
Tbc1d9	ENSRNOG00000003496	1.11066
Plcb2	ENSRNOG00000058337	1.1099
Cd44	ENSRNOG00000006094	1.10812
Il18	ENSRNOG00000009848	1.10755
Sowahc	ENSRNOG00000048831	1.10613
Rasd1	ENSRNOG00000003348	1.10501
Dok3	ENSRNOG00000013564	1.10468
MGC105649	ENSRNOG00000050251	1.1044
Rasd2	ENSRNOG00000014761	1.10421
Slc16a1	ENSRNOG00000019996	1.1041
Anpep	ENSRNOG00000014610	1.10397
Spdef	ENSRNOG00000000491	1.10157
Rgs18	ENSRNOG00000003959	1.10084
LOC681325	ENSRNOG00000023005	1.09947
Ndrg1	ENSRNOG00000007393	1.09727
Lpcat1	ENSRNOG00000017930	1.09723
RGD1563400	ENSRNOG00000048881	1.09617
Serping1	ENSRNOG00000007457	1.09544
Tent5a	ENSRNOG00000010240	1.09078
Mms22l	ENSRNOG00000006996	1.088
Emb	ENSRNOG00000060329	1.08511
Odc1	ENSRNOG00000005424	1.08408
Slc36a1	ENSRNOG00000012356	1.08264
Btk	ENSRNOG00000052407	1.08168
Fhl3	ENSRNOG00000007541	1.08044
Psap	ENSRNOG00000000571	1.0798
Ncf4	ENSRNOG00000006940	1.07715
Myo3b	ENSRNOG00000030022	1.0731
Plet1	ENSRNOG00000024346	1.07235
Tnfrsf11a	ENSRNOG00000015615	1.07186
Slc5a8	ENSRNOG00000006367	1.07126
Ifi27l2b	ENSRNOG00000026605	1.07102
Ehf	ENSRNOG00000007484	1.07031
Slc2a1	ENSRNOG00000007284	1.06984
RGD1561730	ENSRNOG00000057141	1.06969
Npl	ENSRNOG00000002775	1.06842
Ca13	ENSRNOG00000021323	1.06686
Plk4	ENSRNOG00000011654	1.06405
Ripk3	ENSRNOG00000020465	1.0637
Nupr1	ENSRNOG00000019206	1.06262
Phyhd1	ENSRNOG00000016794	1.06255
Nckap1l	ENSRNOG00000036829	1.06177
Rbm47	ENSRNOG00000002408	1.06061
Mmp19	ENSRNOG00000006778	1.06017
Fhod3	ENSRNOG00000027230	1.05972
Cenpf	ENSRNOG00000003388	1.05943
Cyth4	ENSRNOG00000007679	1.05805
Lgi3	ENSRNOG00000011323	1.0544
LOC100360087	ENSRNOG00000020843	1.05217
Plekhh1	ENSRNOG00000010650	1.05121
Slpi	ENSRNOG00000046699	1.05054
Rbl1	ENSRNOG00000006921	1.04991
Vma21	ENSRNOG00000058793	1.04926
Reep4	ENSRNOG00000011373	1.04604
Atp1a1	ENSRNOG00000030019	1.04596
Idh1	ENSRNOG00000015020	1.04418
AABR07069219.1	ENSRNOG00000024757	1.04303
Lbp	ENSRNOG00000014532	1.0416
Srd5a1	ENSRNOG00000017601	1.04157
Litaf	ENSRNOG00000002520	1.04077
Rgs10	ENSRNOG00000042592	1.04018
Gadd45g	ENSRNOG00000013090	1.03653
Abo	ENSRNOG00000046958	1.03573
LOC690045	ENSRNOG00000061895	1.03182
Cnr2	ENSRNOG00000009260	1.02822
Stk32a	ENSRNOG00000027066	1.0277
RGD1304694	ENSRNOG00000031269	1.02754
Hck	ENSRNOG00000009331	1.02503
Ap3s1	ENSRNOG00000003829	1.02436
Aurka	ENSRNOG00000004479	1.024
Lcp1	ENSRNOG00000010319	1.02236
Sla	ENSRNOG00000056714	1.0217
Sqle	ENSRNOG00000009550	1.0214
Tnfaip2	ENSRNOG00000010165	1.02065
Rasa4	ENSRNOG00000001431	1.02036
LOC100910669	ENSRNOG00000033017	1.01942
Tlr1	ENSRNOG00000038722	1.01924
Lypd8	ENSRNOG00000026844	1.01879
Tfcp2l1	ENSRNOG00000002414	1.01854
Fancd2	ENSRNOG00000061085	1.01724
Atp8b4	ENSRNOG00000031598	1.0165
Tyrobp	ENSRNOG00000020845	1.01477
Slx4ip	ENSRNOG00000007430	1.01469
Aif1	ENSRNOG00000000853	1.01414
Scamp5	ENSRNOG00000054008	1.01143
Xk	ENSRNOG00000003749	1.01085
Npc1	ENSRNOG00000012016	1.00993
Fermt3	ENSRNOG00000021161	1.00938
Vav1	ENSRNOG00000050430	1.00897
Rnf128	ENSRNOG00000055721	1.00857
Vwa5a	ENSRNOG00000046414	1.00711
Bmf	ENSRNOG00000007529	1.00526
Snx8	ENSRNOG00000001258	1.00366
RGD1562339	ENSRNOG00000001767	1.00351
Cp	ENSRNOG00000011913	1.00344
Tnfsf13	ENSRNOG00000014171	1.00314
Glrx	ENSRNOG00000012183	1.00313
Dsn1	ENSRNOG00000006236	1.00313
Ankh	ENSRNOG00000010960	1.00192
Hexa	ENSRNOG00000010252	1.0001
Eml1	ENSRNOG00000043143	-1.00312
Actg2	ENSRNOG00000029401	-1.00406
Ripply3	ENSRNOG00000001684	-1.00474
Gstm7	ENSRNOG00000018937	-1.00496
Hoxb3	ENSRNOG00000008313	-1.00574
Satb1	ENSRNOG00000012942	-1.00631
Irak1bp1	ENSRNOG00000008984	-1.00643
Tcf7	ENSRNOG00000005872	-1.00689
Fgfbp3	ENSRNOG00000022796	-1.00756
Hlx	ENSRNOG00000002309	-1.01007
Nme5	ENSRNOG00000020118	-1.01072
Acsm5	ENSRNOG00000031211	-1.0113
Mettl7a	ENSRNOG00000001376	-1.01238
Ccdc85a	ENSRNOG00000003374	-1.0145
Kcnj12	ENSRNOG00000002303	-1.0189
Chit1	ENSRNOG00000028072	-1.02115
Lamc3	ENSRNOG00000059507	-1.02173
Hoxa2	ENSRNOG00000005968	-1.0224
Rgs6	ENSRNOG00000008082	-1.02525
Trank1	ENSRNOG00000021091	-1.0253
S1pr3	ENSRNOG00000014524	-1.0259
Wscd1	ENSRNOG00000007869	-1.02772
Hspa12a	ENSRNOG00000018019	-1.02796
Ace3	ENSRNOG00000007467	-1.02822
Kit	ENSRNOG00000002227	-1.02822
Ptgr1	ENSRNOG00000015072	-1.02841
Fgfr4	ENSRNOG00000016763	-1.02999
Slc25a29	ENSRNOG00000004351	-1.03116
Calml4	ENSRNOG00000038202	-1.03207
Ramp2	ENSRNOG00000020415	-1.03361
Pde9a	ENSRNOG00000001174	-1.03378
Ptn	ENSRNOG00000011946	-1.03645
Slc6a4	ENSRNOG00000003476	-1.04061
Hoxb5	ENSRNOG00000008010	-1.0413
Riiad1	ENSRNOG00000037310	-1.04265
Lmcd1	ENSRNOG00000005690	-1.04486
Lrat	ENSRNOG00000025608	-1.04579
Rgs7	ENSRNOG00000021984	-1.04583
Corin	ENSRNOG00000002302	-1.04589
Col13a1	ENSRNOG00000000552	-1.04696
Susd2	ENSRNOG00000033389	-1.04705
Gimap7	ENSRNOG00000038740	-1.04736
Gal3st3	ENSRNOG00000028743	-1.04763
Aloxe3	ENSRNOG00000007454	-1.04829
Fam13c	ENSRNOG00000000275	-1.04893
LOC100911692	ENSRNOG00000050158	-1.0518
Bmp3	ENSRNOG00000002381	-1.05206
Sox18	ENSRNOG00000016248	-1.05247
Synm	ENSRNOG00000014030	-1.05441
She	ENSRNOG00000020797	-1.05471
Hmgcs2	ENSRNOG00000019120	-1.05534
Lrriq4	ENSRNOG00000009004	-1.0554
Mycbpap	ENSRNOG00000042912	-1.05551
Slc29a1	ENSRNOG00000019752	-1.05897
LOC502684	ENSRNOG00000023721	-1.05917
Pde2a	ENSRNOG00000019560	-1.06023
Cav1	ENSRNOG00000056836	-1.06069
RT1-T24-4	ENSRNOG00000042905	-1.06205
Cabcoco1	ENSRNOG00000000634	-1.06236
Mapt	ENSRNOG00000005133	-1.06653
Colgalt2	ENSRNOG00000028207	-1.06674
Cdkl5	ENSRNOG00000003742	-1.06762
Slc45a3	ENSRNOG00000007591	-1.06932
AABR07028488.1	ENSRNOG00000049614	-1.07083
Trpm5	ENSRNOG00000020484	-1.07308
RT1-CE1	ENSRNOG00000050183	-1.07581
Gimap6	ENSRNOG00000033338	-1.07648
Myoz1	ENSRNOG00000040122	-1.07667
Dnali1	ENSRNOG00000024957	-1.07764
Efhc2	ENSRNOG00000002986	-1.07769
Aoc3	ENSRNOG00000051307	-1.07816
Palmd	ENSRNOG00000058609	-1.08092
Slc4a11	ENSRNOG00000021234	-1.08162
Opcml	ENSRNOG00000023809	-1.08243
F11	ENSRNOG00000013684	-1.08341
Prdm8	ENSRNOG00000002004	-1.08412
Ca4	ENSRNOG00000002916	-1.08423
Gpihbp1	ENSRNOG00000007475	-1.08476
Ldb3	ENSRNOG00000059166	-1.08594
Scube2	ENSRNOG00000013123	-1.08681
Arhgef15	ENSRNOG00000004566	-1.08721
Gzmbl2	ENSRNOG00000049976	-1.08835
Phyhipl	ENSRNOG00000000274	-1.08854
Mtus2	ENSRNOG00000032410	-1.09317
Lrrn3	ENSRNOG00000006368	-1.09456
Rflna	ENSRNOG00000001011	-1.09539
Tek	ENSRNOG00000008587	-1.09606
Cct6b	ENSRNOG00000007523	-1.09696
Myom1	ENSRNOG00000057701	-1.09791
Sstr4	ENSRNOG00000004641	-1.09804
Lrrc34	ENSRNOG00000027935	-1.10162
Spib	ENSRNOG00000019660	-1.10316
Tekt5	ENSRNOG00000002571	-1.10473
Tbx21	ENSRNOG00000009427	-1.10756
Ubxn10	ENSRNOG00000027731	-1.11096
Adra1a	ENSRNOG00000009522	-1.11131
Gsn	ENSRNOG00000018991	-1.11137
Ackr4	ENSRNOG00000011478	-1.11222
Tal1	ENSRNOG00000025051	-1.11492
Ushbp1	ENSRNOG00000023485	-1.11697
Fxyd1	ENSRNOG00000021079	-1.1176
Ctxn1	ENSRNOG00000001057	-1.11768
Cped1	ENSRNOG00000021840	-1.11884
Slc34a3	ENSRNOG00000010451	-1.11912
Kdr	ENSRNOG00000046829	-1.11926
Wdr38	ENSRNOG00000014102	-1.12081
Chadl	ENSRNOG00000024631	-1.12201
Cpe	ENSRNOG00000043387	-1.12227
Tmod2	ENSRNOG00000010447	-1.12321
RGD1561916	ENSRNOG00000013320	-1.12388
Tmem100	ENSRNOG00000002434	-1.12683
Kcnip3	ENSRNOG00000014152	-1.12715
Arhgap20	ENSRNOG00000025624	-1.12979
Tspan8	ENSRNOG00000004411	-1.1312
Kcnh3	ENSRNOG00000057315	-1.13286
Ndrg2	ENSRNOG00000010389	-1.13412
Ttpa	ENSRNOG00000007139	-1.13465
Sh3tc2	ENSRNOG00000019305	-1.136
Sncaip	ENSRNOG00000018254	-1.13604
LOC108348320	ENSRNOG00000006281	-1.13861
Ribc2	ENSRNOG00000033502	-1.14026
LOC499240	ENSRNOG00000013713	-1.14043
Ppp1r3a	ENSRNOG00000059350	-1.14125
Ccdc24	ENSRNOG00000019586	-1.14173
Rai2	ENSRNOG00000006670	-1.14249
Cnn1	ENSRNOG00000027736	-1.14458
Foxf1	ENSRNOG00000049906	-1.1448
Misp3	ENSRNOG00000005619	-1.14622
Adra2b	ENSRNOG00000013887	-1.14955
Ppp1r14a	ENSRNOG00000020676	-1.14966
Tnfsf10	ENSRNOG00000013269	-1.15147
Igfbp2	ENSRNOG00000016957	-1.15178
Gimap1	ENSRNOG00000042229	-1.15296
Zfp711	ENSRNOG00000022391	-1.15332
Ogn	ENSRNOG00000047786	-1.15334
Tdrp	ENSRNOG00000027245	-1.15359
Lpar3	ENSRNOG00000015260	-1.15399
Bank1	ENSRNOG00000032247	-1.15811
Kcnj5	ENSRNOG00000033796	-1.15868
Fam183a	ENSRNOG00000002873	-1.16211
Metrn	ENSRNOG00000019692	-1.16329
Sncg	ENSRNOG00000058006	-1.1641
Enpp6	ENSRNOG00000009660	-1.17241
Nrxn2	ENSRNOG00000021103	-1.17438
Ppp1r3c	ENSRNOG00000018494	-1.17456
Egf	ENSRNOG00000053979	-1.17653
Efnb2	ENSRNOG00000014648	-1.17746
Lax1	ENSRNOG00000028250	-1.18156
Scart1	ENSRNOG00000018978	-1.18161
Cntfr	ENSRNOG00000047307	-1.18417
Egfl7	ENSRNOG00000019388	-1.19211
Ccdc3	ENSRNOG00000017933	-1.19323
Plvap	ENSRNOG00000017676	-1.1945
Sema3g	ENSRNOG00000018952	-1.19806
Itprid1	ENSRNOG00000012165	-1.20257
Hbb-bs	ENSRNOG00000047098	-1.20387
LOC680885	ENSRNOG00000039749	-1.20506
Sptb	ENSRNOG00000006911	-1.20735
Apln	ENSRNOG00000003984	-1.20795
Gnao1	ENSRNOG00000019482	-1.21259
Sez6l	ENSRNOG00000025612	-1.21387
Hba-a1	ENSRNOG00000029886	-1.21426
Ppargc1a	ENSRNOG00000004473	-1.21953
Hbb	ENSRNOG00000058105	-1.21971
Masp1	ENSRNOG00000001827	-1.21994
Nmnat2	ENSRNOG00000027697	-1.21999
Clec14a	ENSRNOG00000022697	-1.2222
AABR07044759.1	ENSRNOG00000049063	-1.22371
Hba-a2	ENSRNOG00000047321	-1.2238
Tox3	ENSRNOG00000028649	-1.22675
Spsb4	ENSRNOG00000012862	-1.23201
Mettl24	ENSRNOG00000024221	-1.2321
Agbl3	ENSRNOG00000010397	-1.23217
Tril	ENSRNOG00000026941	-1.23719
Eef1a2	ENSRNOG00000012477	-1.23762
Magi2	ENSRNOG00000013962	-1.23954
P2rx1	ENSRNOG00000017606	-1.24129
LOC100134871	ENSRNOG00000061299	-1.24264
Tppp3	ENSRNOG00000016890	-1.24296
Hykk	ENSRNOG00000013419	-1.24972
Nr5a2	ENSRNOG00000000653	-1.25044
LOC102554838	ENSRNOG00000031595	-1.25579
Jhy	ENSRNOG00000008138	-1.25751
Art2b	ENSRNOG00000019687	-1.2601
Elmod1	ENSRNOG00000009054	-1.26433
Kcnip2	ENSRNOG00000018018	-1.26536
Cap2	ENSRNOG00000043350	-1.26584
Cyp4b1	ENSRNOG00000055078	-1.27412
AABR07006278.1	ENSRNOG00000020980	-1.27932
Fmo1	ENSRNOG00000034191	-1.28257
RGD1310587	ENSRNOG00000002322	-1.2854
Fbln2	ENSRNOG00000007338	-1.28746
Magix	ENSRNOG00000010092	-1.28847
Myct1	ENSRNOG00000018858	-1.28892
Sbspon	ENSRNOG00000007258	-1.29404
Aplnr	ENSRNOG00000009227	-1.29512
Pcp4l1	ENSRNOG00000003209	-1.29849
Mybphl	ENSRNOG00000037082	-1.30053
Foxc1	ENSRNOG00000017800	-1.30195
Galnt15	ENSRNOG00000019718	-1.30612
LOC103691556	ENSRNOG00000058416	-1.30686
S100b	ENSRNOG00000001295	-1.30821
Spire2	ENSRNOG00000016920	-1.31183
Selenbp1	ENSRNOG00000047158	-1.31524
F13a1	ENSRNOG00000015957	-1.31777
Hey2	ENSRNOG00000013364	-1.31817
G0s2	ENSRNOG00000006019	-1.3195
Rfx8	ENSRNOG00000058243	-1.32265
Plin4	ENSRNOG00000047046	-1.32355
Mogat2	ENSRNOG00000027228	-1.32604
Alas2	ENSRNOG00000000167	-1.33043
Ooep	ENSRNOG00000025957	-1.33244
AABR07008439.1	ENSRNOG00000052173	-1.33656
Efcc1	ENSRNOG00000009787	-1.33681
Cyp2f4	ENSRNOG00000032805	-1.34013
Smad6	ENSRNOG00000009173	-1.34622
Ncs1	ENSRNOG00000008761	-1.3473
Spns2	ENSRNOG00000057040	-1.35041
Ucp3	ENSRNOG00000017716	-1.35685
Mylk3	ENSRNOG00000017546	-1.36179
RGD1307443	ENSRNOG00000018141	-1.36583
Hoxa4	ENSRNOG00000027365	-1.3703
Hic1	ENSRNOG00000046405	-1.37056
Alox15	ENSRNOG00000019183	-1.3724
Col6a4	ENSRNOG00000031782	-1.3747
Cd300lg	ENSRNOG00000020837	-1.37943
AABR07005983.1	ENSRNOG00000005953	-1.38517
Srl	ENSRNOG00000005269	-1.38763
Igfbp3	ENSRNOG00000061910	-1.38772
Cldn8	ENSRNOG00000001571	-1.38848
Ccdc68	ENSRNOG00000021381	-1.38986
Kcnmb2	ENSRNOG00000010094	-1.39112
Cd79b	ENSRNOG00000011917	-1.39877
Adgrv1	ENSRNOG00000016306	-1.40274
Kcnk2	ENSRNOG00000002653	-1.40385
Cyp2e1	ENSRNOG00000012458	-1.40594
Myom2	ENSRNOG00000011754	-1.41438
Fam20a	ENSRNOG00000003969	-1.42206
Csrnp3	ENSRNOG00000005359	-1.424
Igfbpl1	ENSRNOG00000011320	-1.42426
Fmo2	ENSRNOG00000003510	-1.42618
Slc7a10	ENSRNOG00000010938	-1.43361
Slc5a1	ENSRNOG00000017775	-1.43363
Cpvl	ENSRNOG00000009172	-1.44916
Irs3	ENSRNOG00000001389	-1.45068
Epb42	ENSRNOG00000011649	-1.45333
Klrb1c	ENSRNOG00000007811	-1.45372
Ptgfr	ENSRNOG00000046468	-1.45414
Efhd1	ENSRNOG00000015596	-1.45438
Ihh	ENSRNOG00000018059	-1.45682
Prom2	ENSRNOG00000014710	-1.45793
Tubb4a	ENSRNOG00000047505	-1.45989
LOC103689922_1	ENSRNOG00000047951	-1.46207
LOC100912373	ENSRNOG00000047537	-1.46223
Akr1c19	ENSRNOG00000038319	-1.46785
Lrrn1	ENSRNOG00000006802	-1.47149
Tnnt2	ENSRNOG00000033734	-1.47258
Nrarp	ENSRNOG00000009354	-1.47788
Cox8b	ENSRNOG00000014656	-1.48566
Serpina1	ENSRNOG00000032669	-1.49662
Myh6	ENSRNOG00000025757	-1.50183
Tnnc1	ENSRNOG00000018943	-1.50213
Erbb4	ENSRNOG00000014248	-1.50286
Bcl7a	ENSRNOG00000056017	-1.50336
Hrc	ENSRNOG00000020719	-1.50681
Sez6	ENSRNOG00000009350	-1.50977
Atp1a2	ENSRNOG00000007290	-1.51198
Igf2	ENSRNOG00000020369	-1.52119
Fcrl1	ENSRNOG00000034230	-1.52425
Dll4	ENSRNOG00000014011	-1.52918
Ttc34	ENSRNOG00000024526	-1.53318
Rgs13	ENSRNOG00000003888	-1.53659
PCOLCE2	ENSRNOG00000046848	-1.54101
Fabp3	ENSRNOG00000012879	-1.54898
Myl4	ENSRNOG00000050675	-1.55672
Pcdhga1	ENSRNOG00000039463	-1.55746
Larp6	ENSRNOG00000012438	-1.56704
LOC100910790	ENSRNOG00000006033	-1.58096
Adhfe1	ENSRNOG00000007069	-1.5842
RGD1560242	ENSRNOG00000036615	-1.58658
Med22	ENSRNOG00000049749	-1.588
Syndig1	ENSRNOG00000031536	-1.59242
Actn2	ENSRNOG00000017833	-1.59675
AABR07007146.1	ENSRNOG00000048823	-1.6062
LOC100361866	ENSRNOG00000031445	-1.60651
Hcn4	ENSRNOG00000009450	-1.60975
Actc1	ENSRNOG00000008536	-1.61007
Add2	ENSRNOG00000015903	-1.61514
Fxyd7	ENSRNOG00000021067	-1.62038
Hjv	ENSRNOG00000021200	-1.62569
Mybpc3	ENSRNOG00000012307	-1.6261
Rbm24	ENSRNOG00000046547	-1.62934
Fbp1	ENSRNOG00000017597	-1.63354
Enho	ENSRNOG00000043300	-1.63521
Mb	ENSRNOG00000004583	-1.64062
Cpne4	ENSRNOG00000026577	-1.64366
Fam163a	ENSRNOG00000024825	-1.64537
Cyp2a1	ENSRNOG00000020817	-1.64538
Cd19	ENSRNOG00000018311	-1.65192
Adcy1	ENSRNOG00000059479	-1.65218
Cux2	ENSRNOG00000001259	-1.65297
Olr292_1	ENSRNOG00000036647	-1.66449
Unc45b	ENSRNOG00000009466	-1.683
Rab33a	ENSRNOG00000006698	-1.69708
Colq	ENSRNOG00000019615	-1.7059
Camk2a	ENSRNOG00000018712	-1.70637
Ckmt2	ENSRNOG00000055450	-1.70686
Hsd11b2	ENSRNOG00000017084	-1.72007
Csrp3	ENSRNOG00000014327	-1.72724
Tac1	ENSRNOG00000007374	-1.73997
Myl7	ENSRNOG00000014409	-1.73997
Dmrt3	ENSRNOG00000016284	-1.742
Tesc	ENSRNOG00000001128	-1.74741
Sh3rf2	ENSRNOG00000018780	-1.74921
Pcdha4_1	ENSRNOG00000050378	-1.75207
Lrrtm3	ENSRNOG00000026466	-1.80459
Casq2	ENSRNOG00000016243	-1.81832
Myoz2	ENSRNOG00000014815	-1.81926
Mpz	ENSRNOG00000003171	-1.81998
Bmp15	ENSRNOG00000002984	-1.82093
Dnase2b	ENSRNOG00000016262	-1.83885
Penk	ENSRNOG00000008943	-1.86358
Hhatl	ENSRNOG00000019404	-1.866
Smpx	ENSRNOG00000007495	-1.87257
Clec1b	ENSRNOG00000057335	-1.87439
Tnni3	ENSRNOG00000018250	-1.89664
Chrna4	ENSRNOG00000011202	-1.9073
Gnat2	ENSRNOG00000019296	-1.9252
Wbp11l1	ENSRNOG00000049593	-1.92897
Myh7	ENSRNOG00000016983	-1.94653
LOC100912228	ENSRNOG00000009768	-1.96488
Klk6	ENSRNOG00000031927	-1.96825
Upk1a	ENSRNOG00000024331	-1.98118
Scgb3a1	ENSRNOG00000002718	-1.98363
Tnni3k	ENSRNOG00000028225	-2.02991
Pax5	ENSRNOG00000024729	-2.04366
LOC100910196	ENSRNOG00000000916	-2.06801
Ckm	ENSRNOG00000016837	-2.11434
Acoxl	ENSRNOG00000016179	-2.13045
Tubb1	ENSRNOG00000046151	-2.1411
Sstr1	ENSRNOG00000048145	-2.18898
Esm1	ENSRNOG00000010797	-2.20311
RGD1562492/Slc6a21	ENSRNOG00000037219	-2.21846
Vit	ENSRNOG00000004706	-2.23358
AC120568.1/Sh2d6	ENSRNOG00000013605	-2.28589
Lmod2	ENSRNOG00000045831	-2.30111
Gp1bb	ENSRNOG00000046981	-2.36736
Nhlrc4	ENSRNOG00000039279	-2.48528
Slc6a15	ENSRNOG00000027468	-2.5519
Galnt14	ENSRNOG00000007951	-2.6168
Serpinb10	ENSRNOG00000002417	-2.66181
Kcna6	ENSRNOG00000052486	-2.72388
Rbm12_1	ENSRNOG00000046990	-2.78491
Alpg	ENSRNOG00000042889	-2.85962
Dhrs7c	ENSRNOG00000026548	-3.08356
Myl2	ENSRNOG00000030848	-3.9786
Dlk1	ENSRNOG00000019584	-5.1379
LOC103690016/Sbk1	ENSRNOG00000019082	-5.28161
LOC100911776/Ccdc89	ENSRNOG00000022766	-5.94854
Snip1	ENSRNOG00000024889	-7.69217
LOC108348072/RT1-DMa	ENSRNOG00000047864	-8.12634
Faahl	ENSRNOG00000011019	-8.31914

## Sheet: Table S3b All DEGs (Y-1)
Table S3. All significantly differentially expressed genes (DEGs) in MWCNT-treated rat lungs at each time point
Table S3b. All DEGs in MWCNT-treated rat lungs at Year 1
Official Gene Symbol	Ensembl Gene ID	Log₂ fold change
Mmp7	ENSRNOG00000010507	9.57208
Spp1	ENSRNOG00000043451	9.39546
Mt3	ENSRNOG00000018958	8.90147
Lpo	ENSRNOG00000008422	7.90278
Adamts18	ENSRNOG00000011575	7.80261
Nlrp6_1	ENSRNOG00000045677	7.77787
Defb3	ENSRNOG00000038126	6.48811
Retnla	ENSRNOG00000001955	6.46375
AABR07035791.1	ENSRNOG00000049592	6.178
Mmp12	ENSRNOG00000030187	5.99497
Psca	ENSRNOG00000061376	5.61961
Sctr	ENSRNOG00000049766	5.60713
Slc26a4	ENSRNOG00000058692	5.56966
Reg3b	ENSRNOG00000006151	5.51353
Srd5a2	ENSRNOG00000027042	5.45427
Ocm2	ENSRNOG00000001031	5.44493
Smtnl1	ENSRNOG00000007516	5.43506
Tmem72	ENSRNOG00000023340	5.37435
Ankrd34c	ENSRNOG00000013937	5.31147
Orm1	ENSRNOG00000007886	5.25644
Ccl7	ENSRNOG00000000239	5.24794
Mrgprx2	ENSRNOG00000033665	5.22369
Ccl1	ENSRNOG00000021851	5.21433
Krt5	ENSRNOG00000050420	5.21118
Scn10a	ENSRNOG00000032473	5.02044
Marco	ENSRNOG00000049303	4.97834
Clec3a	ENSRNOG00000012238	4.96811
Cxcl6	ENSRNOG00000002843	4.9388
Grin3a	ENSRNOG00000005723	4.92581
Ccl2	ENSRNOG00000007159	4.8537
Reg3g	ENSRNOG00000006579	4.83861
Itih1	ENSRNOG00000033386	4.74385
Mcpt1l1	ENSRNOG00000053494	4.59265
Galr1	ENSRNOG00000016654	4.49789
Ctsk	ENSRNOG00000021155	4.47943
Klk13	ENSRNOG00000022353	4.46844
Pla2g4e	ENSRNOG00000024904	4.3728
A2m	ENSRNOG00000028896	4.32404
Ccl28	ENSRNOG00000059640	4.31245
Il24	ENSRNOG00000004470	4.30259
Anks1b	ENSRNOG00000024870	4.23521
AABR07065883.1	ENSRNOG00000037495	4.1196
Trh	ENSRNOG00000011824	4.08212
Vat1l	ENSRNOG00000011989	4.0509
Spink2	ENSRNOG00000031710	3.97177
RGD1565617_1	ENSRNOG00000047836	3.96897
Atp6v0d2	ENSRNOG00000006926	3.94355
Tpsab1	ENSRNOG00000024181	3.93643
Ccl12	ENSRNOG00000029768	3.92541
Radx	ENSRNOG00000011120	3.9088
Cd5l	ENSRNOG00000023068	3.90319
Cpa3	ENSRNOG00000011181	3.89039
Fabp4	ENSRNOG00000010805	3.88247
Ccl9	ENSRNOG00000028548	3.8585
Mab21l3	ENSRNOG00000016044	3.8557
Rmi2	ENSRNOG00000021902	3.84864
Fstl4	ENSRNOG00000006565	3.83221
C4bpb	ENSRNOG00000004125	3.80402
Tmprss6	ENSRNOG00000000184	3.78929
Ptprn	ENSRNOG00000019587	3.7366
1700066B19Rik	ENSRNOG00000039592	3.72133
Mc5r	ENSRNOG00000016685	3.67606
Calcb	ENSRNOG00000011074	3.66765
Asic2	ENSRNOG00000058308	3.65736
Tm4sf19	ENSRNOG00000001757	3.6251
Lilrb3	ENSRNOG00000046683	3.61361
Tmprss9	ENSRNOG00000032429	3.60615
Atp1a3	ENSRNOG00000020263	3.5809
AABR07061036.1	ENSRNOG00000053228	3.55293
Cfi	ENSRNOG00000053400	3.54783
Lrrtm4	ENSRNOG00000021938	3.52902
Cpne5	ENSRNOG00000000522	3.5193
Fcrlb	ENSRNOG00000003135	3.5032
Tmem45b	ENSRNOG00000008515	3.49962
Adora1	ENSRNOG00000003442	3.4709
Prlhr	ENSRNOG00000009922	3.42752
Tpsb2	ENSRNOG00000018611	3.42021
Galr3	ENSRNOG00000027060	3.40438
Clec4a	ENSRNOG00000010045	3.39569
Lcn2	ENSRNOG00000013973	3.38126
Snap91	ENSRNOG00000023861	3.36248
Mrgprb3	ENSRNOG00000028982	3.34391
LOC689757	ENSRNOG00000037076	3.32849
Rgs9	ENSRNOG00000003800	3.31103
Siglec15	ENSRNOG00000033588	3.24517
Gsg1	ENSRNOG00000008518	3.2448
Syt13	ENSRNOG00000008000	3.24333
Slamf9	ENSRNOG00000008045	3.24043
Gpnmb	ENSRNOG00000008816	3.2337
Gpr84	ENSRNOG00000036834	3.20845
Gcgr	ENSRNOG00000036692	3.20468
Slc13a3	ENSRNOG00000019118	3.19245
Esr1	ENSRNOG00000019358	3.17471
Krt14	ENSRNOG00000003899	3.16383
Rab7b	ENSRNOG00000039754	3.15894
Bpifb5	ENSRNOG00000025238	3.15011
Cma1	ENSRNOG00000020563	3.13667
Tph1	ENSRNOG00000011672	3.12386
Tmc1	ENSRNOG00000051262	3.11322
AABR07065651.1	ENSRNOG00000031848	3.10058
AABR07060994.1	ENSRNOG00000060746	3.09446
Ptk6	ENSRNOG00000012987	3.09253
Thbs2	ENSRNOG00000010529	3.07069
AABR07065772.2	ENSRNOG00000051653	3.05827
Prmt8	ENSRNOG00000053804	3.05678
Gja3	ENSRNOG00000008847	3.05164
Rhbdl2	ENSRNOG00000026592	3.02572
Mreg	ENSRNOG00000015774	3.02141
Muc20	ENSRNOG00000001776	3.01574
Crtac1	ENSRNOG00000015220	3.01178
Chid1	ENSRNOG00000019351	2.99046
Cadm4	ENSRNOG00000024243	2.97801
Pax8	ENSRNOG00000026203	2.96255
Chia	ENSRNOG00000033162	2.95139
Mylk2	ENSRNOG00000008235	2.93062
Gas2l3	ENSRNOG00000025198	2.85022
Pigz_1	ENSRNOG00000047384	2.83528
Wnt10a	ENSRNOG00000052510	2.83156
Scg2	ENSRNOG00000015055	2.82419
Slc37a2	ENSRNOG00000039390	2.81111
Bpifb1	ENSRNOG00000015468	2.78886
LOC100909700	ENSRNOG00000048783	2.7721
Steap3	ENSRNOG00000049471	2.76988
Folr2	ENSRNOG00000019890	2.76715
Ptprv	ENSRNOG00000005277	2.75781
Izumo1r	ENSRNOG00000019894	2.75716
Rspo3	ENSRNOG00000011568	2.74889
Acta1	ENSRNOG00000017786	2.74168
LOC103689942	ENSRNOG00000050105	2.71428
Calca	ENSRNOG00000011130	2.71286
Fcgr2b	ENSRNOG00000046452	2.70591
Cd177	ENSRNOG00000022669	2.69982
Dhrs9	ENSRNOG00000058568	2.6952
Ptchd1	ENSRNOG00000003675	2.69118
AABR07060792.3	ENSRNOG00000057220	2.68978
Adora3	ENSRNOG00000015788	2.68905
Prss22	ENSRNOG00000039698	2.68345
AABR07065789.2	ENSRNOG00000031918	2.68204
C4bpa	ENSRNOG00000004062	2.65788
LOC100911796	ENSRNOG00000050743	2.64853
Gabrr1	ENSRNOG00000007603	2.62685
Il1rn	ENSRNOG00000005871	2.62101
Tnnt1	ENSRNOG00000028041	2.62022
Padi1	ENSRNOG00000007067	2.61448
Clec4f	ENSRNOG00000013137	2.6128
Tac4	ENSRNOG00000004404	2.61228
Dmkn	ENSRNOG00000055934	2.60356
Duox1	ENSRNOG00000033348	2.59997
Sectm1a	ENSRNOG00000036672	2.58962
Tspan10	ENSRNOG00000046076	2.58707
Serpine2	ENSRNOG00000015461	2.586
Tspan11	ENSRNOG00000054360	2.58339
Pigz_2	ENSRNOG00000047082	2.58076
AABR07061134.1	ENSRNOG00000061431	2.57838
AABR07065823.1	ENSRNOG00000029776	2.57201
AABR07051665.1	ENSRNOG00000053446	2.56561
Qprt	ENSRNOG00000016980	2.55954
Fcrl2	ENSRNOG00000016164	2.54868
Gjb6	ENSRNOG00000022116	2.54139
Hk3	ENSRNOG00000026235	2.54012
Aldh1l2	ENSRNOG00000008586	2.52889
Fap	ENSRNOG00000005679	2.52692
Cd68	ENSRNOG00000037563	2.49528
RGD1305807	ENSRNOG00000010497	2.49487
Pla2g7	ENSRNOG00000025691	2.49403
Diras1	ENSRNOG00000029738	2.48748
Lgals3	ENSRNOG00000010645	2.48348
B3gnt3	ENSRNOG00000018764	2.47561
Matk	ENSRNOG00000020431	2.4669
C6	ENSRNOG00000024115	2.45647
LOC100911625	ENSRNOG00000048365	2.44402
Slc6a12	ENSRNOG00000013547	2.44333
Slamf8	ENSRNOG00000008736	2.44015
Mcpt1	ENSRNOG00000020625	2.42489
Hp	ENSRNOG00000014964	2.42058
Kcnc4	ENSRNOG00000060988	2.41954
Tmem59l	ENSRNOG00000022432	2.41719
Prkar1b	ENSRNOG00000028733	2.4133
AABR07067023.1	ENSRNOG00000058742	2.41103
Tnn	ENSRNOG00000002548	2.40982
AABR07051626.2	ENSRNOG00000050889	2.40843
Ly6i	ENSRNOG00000007137	2.38722
AABR07027447.1	ENSRNOG00000047534	2.3785
Cxcl2	ENSRNOG00000002792	2.36312
S100a9	ENSRNOG00000011483	2.36195
Krt17	ENSRNOG00000026371	2.34979
Slurp1	ENSRNOG00000005944	2.34388
C1qa	ENSRNOG00000012807	2.34253
Lilrb4	ENSRNOG00000027811	2.34042
AABR07065768.1	ENSRNOG00000050944	2.33623
AABR07051532.1	ENSRNOG00000049009	2.33574
Tnfsf9	ENSRNOG00000045595	2.32738
Acsbg1	ENSRNOG00000011381	2.32057
C3	ENSRNOG00000046834	2.31996
RGD1559482	ENSRNOG00000048771	2.31793
Ank1	ENSRNOG00000018241	2.31764
Chi3l1	ENSRNOG00000053272	2.31594
AABR07040288.1	ENSRNOG00000047560	2.31493
AABR07060953.1	ENSRNOG00000053327	2.30619
Kctd4	ENSRNOG00000050996	2.30496
Accsl	ENSRNOG00000042533	2.29931
Cd300lb	ENSRNOG00000036728	2.29785
Itgam	ENSRNOG00000019728	2.29623
AABR07065823.3	ENSRNOG00000050708	2.29488
Noxo1	ENSRNOG00000025117	2.28362
Galnt5	ENSRNOG00000004645	2.27171
RGD1307182	ENSRNOG00000042230	2.27014
Cpa4	ENSRNOG00000010463	2.26963
Sfrp5	ENSRNOG00000014940	2.26683
Nog	ENSRNOG00000023683	2.25758
Myom3	ENSRNOG00000032994	2.25072
LOC299282	ENSRNOG00000010478	2.24177
Cdh17	ENSRNOG00000015562	2.24027
Ubd	ENSRNOG00000000768	2.22283
Snx22	ENSRNOG00000022852	2.21606
Serpine1	ENSRNOG00000001414	2.19774
Apoe	ENSRNOG00000018454	2.18819
Vtcn1	ENSRNOG00000015279	2.18634
Trem2	ENSRNOG00000013578	2.18012
Card14	ENSRNOG00000047367	2.17922
Bcat1	ENSRNOG00000015514	2.16769
Clcn4	ENSRNOG00000003533	2.1659
AABR07051532.2	ENSRNOG00000049299	2.16137
Capg	ENSRNOG00000013668	2.15902
Pgr	ENSRNOG00000006831	2.15691
AABR07051534.1	ENSRNOG00000049755	2.15456
Areg	ENSRNOG00000002754	2.14965
AABR07065834.1	ENSRNOG00000048384	2.14266
Slc7a7	ENSRNOG00000010296	2.14163
Cxcl1	ENSRNOG00000002802	2.1369
Tubb3	ENSRNOG00000017209	2.13188
Slco4a1	ENSRNOG00000053430	2.13013
Meis3	ENSRNOG00000021390	2.12946
Itgb8	ENSRNOG00000006569	2.1251
Cpb2	ENSRNOG00000010935	2.12341
Tub	ENSRNOG00000046566	2.12242
Tmem86a	ENSRNOG00000013663	2.12041
Kcnn4	ENSRNOG00000019440	2.10604
Duoxa1	ENSRNOG00000018005	2.09653
AABR07034730.3	ENSRNOG00000057165	2.0907
Foxs1	ENSRNOG00000008529	2.08497
Uchl1	ENSRNOG00000002343	2.08221
Bhlhe41	ENSRNOG00000048961	2.07701
AABR07051684.1	ENSRNOG00000048182	2.074
Aoc1	ENSRNOG00000008575	2.07225
Hpx	ENSRNOG00000018257	2.06435
Slc7a11	ENSRNOG00000010210	2.06247
LOC103689965	ENSRNOG00000000443	2.05775
Resp18	ENSRNOG00000019704	2.04756
LOC497796	ENSRNOG00000060241	2.04502
Il12b	ENSRNOG00000004380	2.0371
AABR07065772.1	ENSRNOG00000050859	2.03507
Shcbp1	ENSRNOG00000053026	2.03322
Pla2g1b	ENSRNOG00000001153	2.03256
Cd86	ENSRNOG00000038835	2.02818
Sel1l3	ENSRNOG00000004932	2.02733
Tnfrsf4	ENSRNOG00000020106	2.02176
Hilpda	ENSRNOG00000054999	2.02173
Cd84	ENSRNOG00000022884	2.01773
Fabp5	ENSRNOG00000049075	2.00852
Rnase9	ENSRNOG00000029516	2.0057
LOC103689922_2	ENSRNOG00000006466	2.00043
Sapcd2	ENSRNOG00000013069	1.99827
Mcoln3	ENSRNOG00000015024	1.98999
Rgs1	ENSRNOG00000003895	1.98854
AABR07051700.1	ENSRNOG00000052969	1.98624
Siglec1	ENSRNOG00000021243	1.984
Cdkn2a	ENSRNOG00000059837	1.98368
Sct	ENSRNOG00000017873	1.97995
Pla2g2a	ENSRNOG00000016945	1.97944
Susd1	ENSRNOG00000056819	1.97675
Actg1	ENSRNOG00000036701	1.97657
Egr2	ENSRNOG00000000640	1.97288
Pld3	ENSRNOG00000018390	1.97011
Gm2a	ENSRNOG00000052219	1.97009
Rassf4	ENSRNOG00000013526	1.9682
Cks2	ENSRNOG00000014130	1.95155
Ccl3	ENSRNOG00000011205	1.95032
Bhlha15	ENSRNOG00000025164	1.94582
Lgmn	ENSRNOG00000007089	1.94161
Ctsz	ENSRNOG00000050697	1.93167
Cxcl11	ENSRNOG00000022298	1.92927
Cdc6	ENSRNOG00000027787	1.91329
Smpdl3a	ENSRNOG00000000815	1.90284
Coch	ENSRNOG00000005286	1.89588
Blnk	ENSRNOG00000013967	1.89569
Agmat	ENSRNOG00000012315	1.89201
Cyp2d3	ENSRNOG00000029179	1.88846
RGD1563917	ENSRNOG00000017273	1.88641
Ptx3	ENSRNOG00000012280	1.88638
Daam2	ENSRNOG00000053945	1.88376
AABR07051708.1	ENSRNOG00000054828	1.87798
Kif14	ENSRNOG00000037211	1.87554
Ptafr	ENSRNOG00000013231	1.87041
Fermt1	ENSRNOG00000021274	1.8691
Rarres1	ENSRNOG00000037853	1.86622
Stap1	ENSRNOG00000002014	1.86402
AABR07051670.1	ENSRNOG00000047535	1.85839
C1qb	ENSRNOG00000012749	1.85647
Arl11	ENSRNOG00000014653	1.8525
Clec5a	ENSRNOG00000026306	1.84453
Ect2	ENSRNOG00000024365	1.84382
Slamf6	ENSRNOG00000038286	1.84158
Kcnip4	ENSRNOG00000032350	1.83953
Fetub	ENSRNOG00000001806	1.83908
Prdx5	ENSRNOG00000021125	1.83625
Pf4	ENSRNOG00000028015	1.83524
Scn4a	ENSRNOG00000012134	1.83341
Cd83	ENSRNOG00000018092	1.82848
Tmem171	ENSRNOG00000015449	1.82422
Cybb	ENSRNOG00000003622	1.82208
Vma21	ENSRNOG00000058793	1.82026
Ifi30	ENSRNOG00000019387	1.81794
Brms1l_1	ENSRNOG00000008249	1.81324
AABR07028352.1	ENSRNOG00000018113	1.81324
Ccl22	ENSRNOG00000016535	1.79958
Batf	ENSRNOG00000008588	1.79799
Sbk1	ENSRNOG00000057696	1.79661
Bcl2a1	ENSRNOG00000047606	1.79592
Gpr34	ENSRNOG00000039759	1.788
Ptges	ENSRNOG00000006320	1.78698
C4a	ENSRNOG00000047657	1.77856
Angptl1	ENSRNOG00000004712	1.77551
Slc16a3	ENSRNOG00000036677	1.77362
Fam20c	ENSRNOG00000001314	1.773
AABR07061052.1	ENSRNOG00000056290	1.77285
Rnaset2	ENSRNOG00000013190	1.77132
Ncf1	ENSRNOG00000001480	1.77062
Tbxas1	ENSRNOG00000007918	1.77056
LOC103690070	ENSRNOG00000029029	1.7687
Cd300le	ENSRNOG00000042825	1.76817
St18	ENSRNOG00000006200	1.76238
Prss30	ENSRNOG00000033266	1.76184
Tgfbr1	ENSRNOG00000007036	1.76179
Cd33	ENSRNOG00000037331	1.7607
Baalc	ENSRNOG00000004697	1.76014
Sting1	ENSRNOG00000042137	1.75549
Sod2	ENSRNOG00000019048	1.75427
Ctsd	ENSRNOG00000020206	1.75253
Rasgrf1	ENSRNOG00000014025	1.75114
AABR07051611.1	ENSRNOG00000049024	1.75092
Pdzk1ip1	ENSRNOG00000008161	1.74896
P2ry2	ENSRNOG00000019283	1.74461
Slc36a3	ENSRNOG00000021310	1.74352
Melk	ENSRNOG00000013598	1.74266
Cldn6	ENSRNOG00000003648	1.7386
AABR07065789.1	ENSRNOG00000006333	1.73848
C3ar1	ENSRNOG00000009211	1.73677
Brinp1	ENSRNOG00000005561	1.73508
E2f8	ENSRNOG00000022537	1.73212
AABR07065789.3	ENSRNOG00000058824	1.729
Ptcd3	ENSRNOG00000009484	1.72552
Klra5	ENSRNOG00000062297	1.72492
Hvcn1	ENSRNOG00000001270	1.72293
Them5	ENSRNOG00000043445	1.72116
Clec12a	ENSRNOG00000054860	1.71933
Ttyh2	ENSRNOG00000024578	1.71678
Ctsh	ENSRNOG00000014064	1.71533
Scimp	ENSRNOG00000037409	1.71512
Ddias	ENSRNOG00000022521	1.71145
Kcnj13	ENSRNOG00000016057	1.71092
Kif2c	ENSRNOG00000019100	1.70655
Ereg	ENSRNOG00000002771	1.70558
Cldn4	ENSRNOG00000001476	1.70126
AABR07027450.1	ENSRNOG00000045599	1.70087
Npc2	ENSRNOG00000012062	1.70049
Clec4e	ENSRNOG00000061394	1.69953
Tmprss4	ENSRNOG00000026650	1.69927
Cdca3	ENSRNOG00000015529	1.69813
AABR07051533.2	ENSRNOG00000043155	1.69591
Tiam1	ENSRNOG00000021569	1.6952
Il36b	ENSRNOG00000043323	1.69416
Myo5a	ENSRNOG00000058866	1.69342
Ms4a2	ENSRNOG00000020993	1.69141
Olr1	ENSRNOG00000056219	1.69083
AABR07063279.1	ENSRNOG00000051056	1.68758
Tnfrsf9	ENSRNOG00000036942	1.68539
Lat2	ENSRNOG00000021856	1.68499
Fxyd2	ENSRNOG00000016469	1.68384
Ccnb1	ENSRNOG00000058539	1.68342
Pcdh9	ENSRNOG00000038068	1.68264
Myo7a	ENSRNOG00000013641	1.68161
Ctss	ENSRNOG00000021157	1.68109
Cfb_1	ENSRNOG00000000419	1.67972
Kmo	ENSRNOG00000003709	1.6726
Trpa1	ENSRNOG00000007354	1.6619
C2	ENSRNOG00000051235	1.66063
Cgref1	ENSRNOG00000007923	1.65974
Ctsb	ENSRNOG00000010331	1.65921
Qsox1	ENSRNOG00000003649	1.65815
RGD1565367	ENSRNOG00000026919	1.65692
RT1-DMa	ENSRNOG00000047854	1.65658
Nuf2	ENSRNOG00000002711	1.65558
Trem1	ENSRNOG00000022859	1.6529
Dscam	ENSRNOG00000027992	1.6526
RT1-Bb	ENSRNOG00000032708	1.65124
Ccl17	ENSRNOG00000016278	1.64324
Il1r2	ENSRNOG00000014378	1.64287
LOC100359539	ENSRNOG00000008450	1.64095
Csf2ra	ENSRNOG00000049782	1.63468
Emilin2	ENSRNOG00000014837	1.63397
C4b	ENSRNOG00000030729	1.62676
Col16a1	ENSRNOG00000031475	1.62647
Clec4a3	ENSRNOG00000010018	1.6177
Cd300a	ENSRNOG00000057058	1.61708
Slc2a5	ENSRNOG00000017693	1.61433
Cdkn3	ENSRNOG00000009785	1.61318
Il18bp	ENSRNOG00000020150	1.61249
Iqgap3	ENSRNOG00000027894	1.60842
Csf2rb	ENSRNOG00000000187	1.60838
Clec4a2	ENSRNOG00000030012	1.60566
Abcb11	ENSRNOG00000050860	1.60381
Pycr1	ENSRNOG00000036682	1.59999
C1qc	ENSRNOG00000012804	1.59996
Plau	ENSRNOG00000010516	1.59893
Cd14	ENSRNOG00000017819	1.59887
Nipal4	ENSRNOG00000006255	1.59571
Lrrn4cl	ENSRNOG00000026302	1.59545
Slc9a7	ENSRNOG00000004150	1.59527
Acp5	ENSRNOG00000046261	1.59504
Cenph	ENSRNOG00000018615	1.59275
Gpr68	ENSRNOG00000046309	1.59157
Tmem176a	ENSRNOG00000023708	1.58987
Serinc2	ENSRNOG00000012989	1.58844
Inhba	ENSRNOG00000014320	1.58817
AABR07065750.2	ENSRNOG00000050118	1.58546
AABR07051562.1	ENSRNOG00000042083	1.58511
Enpp3	ENSRNOG00000013791	1.58202
Sh2b2	ENSRNOG00000001425	1.57589
Gpr183	ENSRNOG00000025094	1.57517
Mastl	ENSRNOG00000054474	1.57196
Kcnk13	ENSRNOG00000047363	1.57048
Cyba	ENSRNOG00000013014	1.56658
AABR07032097.1	ENSRNOG00000019744	1.56646
AABR07051551.2	ENSRNOG00000058460	1.56604
Trim46	ENSRNOG00000055433	1.56373
Ccne1	ENSRNOG00000014786	1.56232
Sez6l2	ENSRNOG00000027098	1.55803
Dcstamp	ENSRNOG00000004704	1.55574
Msr1	ENSRNOG00000012779	1.55012
Diaph3	ENSRNOG00000008986	1.54978
Gch1	ENSRNOG00000011039	1.54864
Entpd3	ENSRNOG00000018982	1.54815
Slc47a1	ENSRNOG00000057404	1.54452
Ms4a6a	ENSRNOG00000020991	1.54397
Abca6	ENSRNOG00000046890	1.54322
LOC108348139	ENSRNOG00000051002	1.53861
Ms4a7	ENSRNOG00000020953	1.53842
Fcgr2a	ENSRNOG00000046663	1.53708
Fam111a	ENSRNOG00000012067	1.53376
Muc1	ENSRNOG00000020539	1.53264
Cd200r1	ENSRNOG00000039048	1.53224
Elf3	ENSRNOG00000006330	1.531
AABR07065676.1	ENSRNOG00000056495	1.52979
F3	ENSRNOG00000011800	1.52928
Rnf150	ENSRNOG00000003479	1.52856
RT1-DMb	ENSRNOG00000049491	1.52754
Atp6v1b2	ENSRNOG00000011891	1.52712
C2cd4b	ENSRNOG00000009106	1.52422
Layn	ENSRNOG00000011228	1.52374
RT1-Db1	ENSRNOG00000033215	1.51976
Tmem176b	ENSRNOG00000008465	1.51875
Serpina10	ENSRNOG00000048988	1.51764
Grin2c	ENSRNOG00000003280	1.51376
Gk5	ENSRNOG00000010942	1.5133
Cadps	ENSRNOG00000008570	1.50907
B3gnt7	ENSRNOG00000018267	1.50815
Slc41a2	ENSRNOG00000008713	1.50422
AABR07051583.1	ENSRNOG00000050066	1.50379
Mafb	ENSRNOG00000016037	1.50213
Chst1	ENSRNOG00000007989	1.49765
Cpxm2	ENSRNOG00000015902	1.4963
Sdf2l1	ENSRNOG00000001859	1.49366
Nipsnap3b	ENSRNOG00000010332	1.4911
Mmp14	ENSRNOG00000010947	1.4894
Plbd1	ENSRNOG00000008933	1.48709
Lipa	ENSRNOG00000019077	1.48461
Lyc2	ENSRNOG00000034139	1.48081
Ttk	ENSRNOG00000029055	1.47919
Kng1	ENSRNOG00000030387	1.47683
Cftr	ENSRNOG00000055103	1.47646
Glis1	ENSRNOG00000000138	1.4764
Mcoln2	ENSRNOG00000015089	1.47376
Gins1	ENSRNOG00000008091	1.47366
Opn3	ENSRNOG00000003778	1.47239
Ncapg	ENSRNOG00000038572	1.47136
C5	ENSRNOG00000018899	1.46919
Igf1	ENSRNOG00000004517	1.46752
Mnda	ENSRNOG00000003486	1.46732
Tuba1c	ENSRNOG00000021438	1.46638
RT1-M2	ENSRNOG00000049590	1.46593
Pclaf	ENSRNOG00000016561	1.46201
Hmox1	ENSRNOG00000014117	1.4599
Knstrn	ENSRNOG00000009334	1.45895
AC111831.2	ENSRNOG00000060905	1.45621
Ube2c	ENSRNOG00000015131	1.45566
Gusb	ENSRNOG00000000913	1.45455
Itgax	ENSRNOG00000036703	1.45252
Mmp19	ENSRNOG00000006778	1.45208
Dpp7	ENSRNOG00000012640	1.4493
Pdlim4	ENSRNOG00000050794	1.44919
Atf3	ENSRNOG00000003745	1.44887
Unc5cl	ENSRNOG00000046601	1.44854
Ly86	ENSRNOG00000000137	1.44629
Rgs18	ENSRNOG00000003959	1.44579
C5ar1	ENSRNOG00000047800	1.44472
Vsig2	ENSRNOG00000033490	1.44458
Sftpd	ENSRNOG00000056001	1.4434
Foxp3	ENSRNOG00000011702	1.44309
Cotl1	ENSRNOG00000016257	1.4403
Tnip3	ENSRNOG00000054524	1.43982
Apobec1	ENSRNOG00000015411	1.43973
Dusp4	ENSRNOG00000011921	1.43861
RT1-Da	ENSRNOG00000032844	1.43719
Prcp	ENSRNOG00000010630	1.43687
Clec4a1	ENSRNOG00000042139	1.43623
Asgr2	ENSRNOG00000030726	1.43514
Tnfaip2	ENSRNOG00000010165	1.4348
Slc25a43	ENSRNOG00000012756	1.43336
Xcr1	ENSRNOG00000006620	1.43325
Pram1	ENSRNOG00000039204	1.43137
Mcpt8l2	ENSRNOG00000049096	1.4303
Tubb2b	ENSRNOG00000017445	1.42889
Rrm2	ENSRNOG00000054286	1.42734
Myh4	ENSRNOG00000049695	1.42156
Serping1	ENSRNOG00000007457	1.42127
Arg1	ENSRNOG00000013304	1.41964
Hs6st2	ENSRNOG00000030880	1.41563
Fam3b	ENSRNOG00000001962	1.41452
Gabrr2	ENSRNOG00000007490	1.41393
Rmdn2	ENSRNOG00000006082	1.40818
AABR07030903.1	ENSRNOG00000049552	1.40663
Lhfpl2	ENSRNOG00000011032	1.40443
AABR07061001.1	ENSRNOG00000051739	1.40365
S100a8	ENSRNOG00000011557	1.40122
Rims2	ENSRNOG00000004201	1.40058
Piwil4	ENSRNOG00000009043	1.40007
Cst7	ENSRNOG00000006767	1.39981
AABR07065699.5	ENSRNOG00000058753	1.3993
Grn	ENSRNOG00000021031	1.3992
Cd74	ENSRNOG00000018735	1.39877
Chac1	ENSRNOG00000014387	1.39423
Zc3h12a	ENSRNOG00000009131	1.39398
Bub1b	ENSRNOG00000007906	1.39384
AABR07065699.4	ENSRNOG00000058352	1.39375
Sftpa1	ENSRNOG00000011438	1.39313
C2cd4d	ENSRNOG00000020832	1.39209
LOC108348047	ENSRNOG00000049422	1.39033
Pirb	ENSRNOG00000058422	1.38883
Slc49a3	ENSRNOG00000023937	1.38448
Frzb	ENSRNOG00000007765	1.38392
Card9	ENSRNOG00000051470	1.38214
Pkib	ENSRNOG00000000811	1.38055
Tf	ENSRNOG00000030625	1.3803
Tlcd4	ENSRNOG00000025160	1.38027
Rnd1	ENSRNOG00000059857	1.37901
Fxyd5	ENSRNOG00000021062	1.37779
Cfd	ENSRNOG00000033564	1.37251
AABR07065699.1	ENSRNOG00000050102	1.37151
Ttc9	ENSRNOG00000007254	1.36939
RT1-Ba	ENSRNOG00000000451	1.36639
Adra2a	ENSRNOG00000047545	1.36617
Kif22	ENSRNOG00000020281	1.36567
Pbk	ENSRNOG00000015308	1.36486
Asf1b	ENSRNOG00000005115	1.36344
Ctsa	ENSRNOG00000015857	1.36316
Adora2b	ENSRNOG00000002922	1.36257
Tlr12	ENSRNOG00000042455	1.36217
Dok3	ENSRNOG00000013564	1.36157
Slc6a20	ENSRNOG00000006010	1.36084
P2ry6	ENSRNOG00000019270	1.35849
Sp6	ENSRNOG00000023551	1.35708
gene:ENSRNOG00000034190	ENSRNOG00000034190	1.35699
Cdk1	ENSRNOG00000000632	1.35387
Ccna2	ENSRNOG00000015423	1.35261
Nusap1	ENSRNOG00000004921	1.352
Rnls	ENSRNOG00000020705	1.34992
Slc11a1	ENSRNOG00000014956	1.34952
Ckap2	ENSRNOG00000024650	1.34848
Thbs1	ENSRNOG00000045829	1.34666
Abo	ENSRNOG00000046958	1.34495
Cenpi	ENSRNOG00000033335	1.33946
Hpdl	ENSRNOG00000018143	1.3377
Susd3	ENSRNOG00000016525	1.33741
Cldn10	ENSRNOG00000010085	1.33682
P2ry12	ENSRNOG00000013902	1.33567
AABR07013111.1	ENSRNOG00000030575	1.3355
Anln	ENSRNOG00000014343	1.33471
Itgb2	ENSRNOG00000001224	1.33345
Degs2	ENSRNOG00000011716	1.33189
Stom	ENSRNOG00000019147	1.33146
Ube2ql1	ENSRNOG00000034075	1.33145
Spi1	ENSRNOG00000012172	1.33145
AABR07065837.1	ENSRNOG00000055375	1.33058
LOC100911515	ENSRNOG00000050669	1.3303
Bard1	ENSRNOG00000014960	1.33018
AABR07001416.1	ENSRNOG00000059050	1.32967
Mtf1	ENSRNOG00000050240	1.32961
Ncaph	ENSRNOG00000012051	1.32859
Itih4	ENSRNOG00000017381	1.32461
Amdhd2	ENSRNOG00000006460	1.32409
Slc4a5	ENSRNOG00000010378	1.32199
Cd53	ENSRNOG00000017874	1.32186
Cstb	ENSRNOG00000001201	1.32032
LOC100360087	ENSRNOG00000020843	1.31954
Igsf8	ENSRNOG00000007604	1.31566
Aif1	ENSRNOG00000000853	1.31432
AABR07065693.3	ENSRNOG00000056285	1.31395
Tnfrsf12a	ENSRNOG00000003546	1.31172
Cd63	ENSRNOG00000007650	1.31146
Gpr137b	ENSRNOG00000002480	1.31128
Fhl3	ENSRNOG00000007541	1.31094
Otulinl	ENSRNOG00000012109	1.31036
Psap	ENSRNOG00000000571	1.30229
Rhbg	ENSRNOG00000019412	1.29928
Lyz2	ENSRNOG00000005825	1.29699
Slc16a6	ENSRNOG00000000245	1.29513
Irf5	ENSRNOG00000007437	1.29369
Slc25a13	ENSRNOG00000009957	1.29228
Mcm5	ENSRNOG00000014336	1.29143
Slc13a2	ENSRNOG00000010337	1.29133
Frrs1	ENSRNOG00000016351	1.29081
Ptger2	ENSRNOG00000050968	1.29036
Osm	ENSRNOG00000024390	1.2892
Ebf4	ENSRNOG00000007408	1.28801
Atp8a1	ENSRNOG00000034200	1.2876
Cxcl13	ENSRNOG00000024899	1.28743
Ftl1	ENSRNOG00000031506	1.28733
RGD1560455	ENSRNOG00000037838	1.28674
Phgdh	ENSRNOG00000019328	1.28571
Tlr11	ENSRNOG00000032368	1.28449
Scamp5	ENSRNOG00000054008	1.28253
Trpv2	ENSRNOG00000003104	1.28044
Cd80	ENSRNOG00000001527	1.27824
Ckap2l	ENSRNOG00000026143	1.27185
Lrrc25	ENSRNOG00000022565	1.26655
Racgap1	ENSRNOG00000049033	1.2655
Cip2a	ENSRNOG00000039183	1.26463
Ccnf	ENSRNOG00000007483	1.26354
Ndrg1	ENSRNOG00000007393	1.26318
Fcer2	ENSRNOG00000001005	1.26272
Scn3b	ENSRNOG00000057221	1.26177
Rab32	ENSRNOG00000014258	1.25489
Clec10a	ENSRNOG00000018715	1.25376
Gk	ENSRNOG00000034116	1.25315
Serpinb1a	ENSRNOG00000016581	1.25222
Ypel4	ENSRNOG00000060130	1.25183
AABR07060872.1	ENSRNOG00000049829	1.24938
Dhcr7	ENSRNOG00000020776	1.24811
Aqp9	ENSRNOG00000061883	1.24651
Gjb1	ENSRNOG00000003746	1.24504
AABR07065645.2	ENSRNOG00000047785	1.24118
Ak4	ENSRNOG00000045738	1.24031
Cspg5	ENSRNOG00000020833	1.24001
Serpinb8	ENSRNOG00000002396	1.2398
Ticrr	ENSRNOG00000015520	1.23973
Tmem163	ENSRNOG00000003769	1.23934
Folr1	ENSRNOG00000019902	1.23856
Ccl4	ENSRNOG00000011406	1.23792
Edil3	ENSRNOG00000033064	1.23734
Plaur	ENSRNOG00000037931	1.23733
Defb4	ENSRNOG00000013939	1.23642
Cxcl10	ENSRNOG00000022256	1.23563
Sfta2	ENSRNOG00000048987	1.23251
Pip5k1b	ENSRNOG00000015232	1.23141
Snx8	ENSRNOG00000001258	1.23056
Xk	ENSRNOG00000003749	1.23016
Parvg	ENSRNOG00000052064	1.2268
Xylt1	ENSRNOG00000056658	1.22579
Dnajc22	ENSRNOG00000053498	1.22249
Uba1y	ENSRNOG00000052326	1.22128
Gaa	ENSRNOG00000047656	1.2211
Arhgap11a	ENSRNOG00000008115	1.21636
Tmem132c	ENSRNOG00000000963	1.21583
Nrcam	ENSRNOG00000004067	1.21207
Soat1	ENSRNOG00000004111	1.21195
Ifi27l2b	ENSRNOG00000026605	1.20943
Rgs10	ENSRNOG00000042592	1.20922
Galc	ENSRNOG00000003759	1.20803
Esco2	ENSRNOG00000015921	1.20725
Sap30	ENSRNOG00000013218	1.20646
Gadd45g	ENSRNOG00000013090	1.20633
Fcgr1a	ENSRNOG00000021199	1.20074
Espl1	ENSRNOG00000012835	1.2003
Tyrobp	ENSRNOG00000020845	1.19871
Kntc1	ENSRNOG00000033658	1.19861
Sfn	ENSRNOG00000033153	1.19576
Spag5_2	ENSRNOG00000011777	1.19331
Cx3cl1	ENSRNOG00000016326	1.19316
Cep55	ENSRNOG00000016377	1.19114
Oma1	ENSRNOG00000007214	1.18989
Sowahc	ENSRNOG00000048831	1.18765
Slc7a5	ENSRNOG00000018824	1.18706
Sgpl1	ENSRNOG00000000565	1.18615
Thy1	ENSRNOG00000006604	1.18506
Ugt1a6	ENSRNOG00000018740	1.18328
Gem	ENSRNOG00000015160	1.183
Lst1	ENSRNOG00000000855	1.18239
RGD1565785	ENSRNOG00000003748	1.18188
Fbp2	ENSRNOG00000017637	1.18184
Cd4	ENSRNOG00000016294	1.18105
Plet1	ENSRNOG00000024346	1.18053
Cysltr1	ENSRNOG00000037845	1.18045
Fgd2	ENSRNOG00000000528	1.1803
Nnmt	ENSRNOG00000005930	1.17964
Cyth4	ENSRNOG00000007679	1.17874
Idh1	ENSRNOG00000015020	1.17734
LOC690045	ENSRNOG00000061895	1.17652
Hexa	ENSRNOG00000010252	1.17019
LOC690097	ENSRNOG00000058993	1.16833
Hsd17b1	ENSRNOG00000019830	1.16667
Trip13	ENSRNOG00000015810	1.16491
LOC103690326	ENSRNOG00000057189	1.16085
Hjurp	ENSRNOG00000022911	1.16076
Lpcat1	ENSRNOG00000017930	1.16019
Malt1	ENSRNOG00000017181	1.15958
Uhrf1	ENSRNOG00000048411	1.15917
Tnfsf8	ENSRNOG00000048321	1.15874
Il1rl1	ENSRNOG00000014835	1.15682
Dennd2d	ENSRNOG00000017680	1.15545
Arhgap22	ENSRNOG00000024728	1.15528
Wfdc21	ENSRNOG00000029668	1.15422
Tnfrsf11a	ENSRNOG00000015615	1.15353
Tcp11l1	ENSRNOG00000042576	1.15351
Havcr2	ENSRNOG00000031443	1.15244
Ntrk2	ENSRNOG00000018839	1.15216
Kif18b	ENSRNOG00000021713	1.15166
Rad51	ENSRNOG00000037302	1.15149
Ddhd1	ENSRNOG00000009481	1.15066
Crlf2	ENSRNOG00000049828	1.15066
Htr2b	ENSRNOG00000017625	1.15012
Naglu	ENSRNOG00000032381	1.15009
Sh2d1b	ENSRNOG00000031599	1.14891
AABR07060980.1	ENSRNOG00000056052	1.14848
Zbtb48	ENSRNOG00000009595	1.14699
Pim1	ENSRNOG00000000529	1.14413
Lypd8	ENSRNOG00000026844	1.14313
Hk2	ENSRNOG00000006116	1.14297
Tc2n	ENSRNOG00000004754	1.14227
Tcirg1	ENSRNOG00000017220	1.14203
Litaf	ENSRNOG00000002520	1.14202
Egfl6	ENSRNOG00000004275	1.14172
Slc15a3	ENSRNOG00000021644	1.14123
Igh-6	ENSRNOG00000048402	1.14112
Tpbgl	ENSRNOG00000017922	1.14042
Rnf128	ENSRNOG00000055721	1.13965
Tnfaip8l2	ENSRNOG00000021100	1.13831
Spc25	ENSRNOG00000006731	1.13793
Ncf4	ENSRNOG00000006940	1.13733
Fermt3	ENSRNOG00000021161	1.13537
Sh3pxd2b	ENSRNOG00000004063	1.13518
Sema4a	ENSRNOG00000019737	1.1351
Lamp3	ENSRNOG00000022792	1.13377
RGD1564664	ENSRNOG00000055564	1.1335
Syngr1	ENSRNOG00000017108	1.13334
Cenpa	ENSRNOG00000032178	1.13295
Plk1	ENSRNOG00000018815	1.1284
Sgms2	ENSRNOG00000011284	1.12832
Glrx	ENSRNOG00000012183	1.12819
Ripk3	ENSRNOG00000020465	1.12708
Bcl3	ENSRNOG00000043416	1.12653
Gpx1	ENSRNOG00000048812	1.12522
Metrnl	ENSRNOG00000046202	1.12375
RGD1304694	ENSRNOG00000031269	1.11831
Mcm10	ENSRNOG00000017981	1.11679
Mmp9	ENSRNOG00000017539	1.11677
Mfsd2a	ENSRNOG00000014008	1.11611
Unc93b1	ENSRNOG00000017703	1.11606
Mfsd12	ENSRNOG00000039858	1.1156
Oscar	ENSRNOG00000055716	1.11152
AABR07039446.2	ENSRNOG00000061403	1.11151
Gas7	ENSRNOG00000049361	1.1114
Chdh	ENSRNOG00000015859	1.11078
LOC108348048	ENSRNOG00000000195	1.11018
Tnfsf13	ENSRNOG00000014171	1.10816
LOC100911660	ENSRNOG00000047692	1.10776
Apobr	ENSRNOG00000017403	1.10775
Tfec	ENSRNOG00000061595	1.10746
Evi2a	ENSRNOG00000022764	1.10702
Rasa4	ENSRNOG00000001431	1.10629
Vcan	ENSRNOG00000029212	1.1055
Osbpl8	ENSRNOG00000026962	1.10503
Ndc80	ENSRNOG00000013727	1.10355
Il18	ENSRNOG00000009848	1.10227
Naaa	ENSRNOG00000002273	1.10211
Npl	ENSRNOG00000002775	1.1006
Slc2a1	ENSRNOG00000007284	1.09998
Txnrd3	ENSRNOG00000059810	1.09537
Jchain	ENSRNOG00000003666	1.09337
Irf4	ENSRNOG00000061070	1.09302
Micall2	ENSRNOG00000022533	1.09199
Kif20b	ENSRNOG00000018929	1.0908
Pcsk1	ENSRNOG00000011107	1.08999
Lpxn	ENSRNOG00000012611	1.08958
Btk	ENSRNOG00000052407	1.0892
Fhod3	ENSRNOG00000027230	1.08763
Gja1	ENSRNOG00000000805	1.08682
Gcat	ENSRNOG00000055408	1.08582
Reep4	ENSRNOG00000011373	1.08503
Emp1	ENSRNOG00000008676	1.08262
Phyhd1	ENSRNOG00000016794	1.08199
AABR07014974.1	ENSRNOG00000052298	1.08104
Sgo2	ENSRNOG00000027035	1.08082
Ticam2	ENSRNOG00000042070	1.08076
P2ry13	ENSRNOG00000029756	1.07983
Fnip2	ENSRNOG00000027833	1.0777
Hck	ENSRNOG00000009331	1.07547
Tlr1	ENSRNOG00000038722	1.07489
Cd72	ENSRNOG00000017485	1.07472
Tk1	ENSRNOG00000047314	1.07463
Phlda1	ENSRNOG00000004019	1.07401
Fosb	ENSRNOG00000046667	1.07225
Srd5a1	ENSRNOG00000017601	1.07054
Mybl2	ENSRNOG00000007805	1.06975
Timp1	ENSRNOG00000010208	1.06836
Akr1b8	ENSRNOG00000009734	1.06704
Pigr	ENSRNOG00000004405	1.06685
Osmr	ENSRNOG00000033192	1.06515
Gpr176	ENSRNOG00000005971	1.06507
E2f3	ENSRNOG00000029273	1.06391
Fgg	ENSRNOG00000025074	1.06355
Top2a	ENSRNOG00000053047	1.06272
P2rx4	ENSRNOG00000001300	1.06179
Vwa5a	ENSRNOG00000046414	1.05987
RGD1563400	ENSRNOG00000048881	1.05772
Trem3	ENSRNOG00000013748	1.05634
AC141959.1	ENSRNOG00000028545	1.05506
Tbc1d9	ENSRNOG00000003496	1.0543
LOC100911104	ENSRNOG00000023397	1.05397
Rasd2	ENSRNOG00000014761	1.05261
LOC100910669	ENSRNOG00000033017	1.05005
Emb	ENSRNOG00000060329	1.04931
Lilra5	ENSRNOG00000027808	1.04918
Tlr2	ENSRNOG00000009822	1.04799
Trim47	ENSRNOG00000008215	1.04697
AABR07060963.2	ENSRNOG00000055428	1.04636
Ehf	ENSRNOG00000007484	1.04621
Nabp1	ENSRNOG00000015416	1.04488
Cog5	ENSRNOG00000056610	1.04478
Eno2	ENSRNOG00000013141	1.04377
Mybpc2	ENSRNOG00000019627	1.04361
Slc29a3	ENSRNOG00000000568	1.04297
C1s	ENSRNOG00000011971	1.04164
Cldn11	ENSRNOG00000010263	1.04048
LOC690813	ENSRNOG00000048070	1.03848
Mgp	ENSRNOG00000005695	1.03264
Vwa7	ENSRNOG00000000860	1.03096
AABR07070117.1	ENSRNOG00000059851	1.03065
Nfkbie	ENSRNOG00000019907	1.03046
Epha7	ENSRNOG00000007030	1.02744
Agt	ENSRNOG00000018445	1.02405
Mvd	ENSRNOG00000013376	1.02402
Hdac9	ENSRNOG00000004158	1.02282
Cd302	ENSRNOG00000006623	1.022
Tec	ENSRNOG00000002278	1.02133
Slpi	ENSRNOG00000046699	1.01989
Pcyox1	ENSRNOG00000016704	1.01881
Sidt2	ENSRNOG00000017871	1.01869
Hpn	ENSRNOG00000021097	1.01767
Cdca2	ENSRNOG00000025302	1.01657
Hcar2	ENSRNOG00000026653	1.01474
Dusp9	ENSRNOG00000055185	1.01421
Cemip	ENSRNOG00000012442	1.01267
Gnpda1	ENSRNOG00000047213	1.01207
Slc26a11	ENSRNOG00000030537	1.01131
Mad2l1	ENSRNOG00000005376	1.00936
Mms22l	ENSRNOG00000006996	1.00873
Ppt1	ENSRNOG00000012616	1.00847
Cd44	ENSRNOG00000006094	1.00504
Lbp	ENSRNOG00000014532	1.00426
Wnt7b	ENSRNOG00000015750	1.0038
Alox12	ENSRNOG00000027037	1.00379
Prc1	ENSRNOG00000013057	1.0012
Serpinf1	ENSRNOG00000003172	1.00063
Lgals1	ENSRNOG00000009884	1.00018
Ccdc60	ENSRNOG00000032684	-1.00158
Hs3st3b1	ENSRNOG00000003384	-1.00165
Dll1	ENSRNOG00000059984	-1.0018
Rtkn2	ENSRNOG00000000636	-1.00288
Neurl1	ENSRNOG00000020339	-1.0034
Edaradd	ENSRNOG00000002624	-1.00355
Prkcg	ENSRNOG00000054371	-1.00386
Gdap1	ENSRNOG00000005850	-1.00404
Osbpl6	ENSRNOG00000010812	-1.00408
Kif1a	ENSRNOG00000023993	-1.00456
Tln2	ENSRNOG00000018373	-1.00479
Pof1b	ENSRNOG00000004795	-1.00551
Tbx21	ENSRNOG00000009427	-1.00575
Hap1	ENSRNOG00000014819	-1.00587
Speg	ENSRNOG00000019850	-1.0086
Smad6	ENSRNOG00000009173	-1.00924
LOC100910790	ENSRNOG00000006033	-1.00941
Dmpk	ENSRNOG00000015085	-1.00957
Six1	ENSRNOG00000022777	-1.00985
Gulp1	ENSRNOG00000003242	-1.01064
Gucy1a2	ENSRNOG00000029876	-1.01085
Ttc25	ENSRNOG00000017473	-1.01335
Adamts5	ENSRNOG00000057794	-1.01388
Tll1	ENSRNOG00000033528	-1.01407
Tmem212	ENSRNOG00000012608	-1.01436
Dhtkd1	ENSRNOG00000023587	-1.01446
Lrrc6	ENSRNOG00000005233	-1.01456
Cfap126	ENSRNOG00000034221	-1.01508
Far2	ENSRNOG00000001851	-1.01594
Mycbpap	ENSRNOG00000042912	-1.01645
Akap12	ENSRNOG00000019549	-1.01718
Fgfr4	ENSRNOG00000016763	-1.01797
Lmod1	ENSRNOG00000051548	-1.01924
Maats1	ENSRNOG00000002976	-1.01928
Lrrc32	ENSRNOG00000015310	-1.01961
Fndc7	ENSRNOG00000020421	-1.01992
Zfp474	ENSRNOG00000018724	-1.02001
LOC688553	ENSRNOG00000037632	-1.02062
Mettl24	ENSRNOG00000024221	-1.02072
Clspn	ENSRNOG00000011332	-1.02078
Kcnk2	ENSRNOG00000002653	-1.02093
Spib	ENSRNOG00000019660	-1.02151
Ccdc17	ENSRNOG00000023216	-1.02213
S1pr3	ENSRNOG00000014524	-1.02324
Slc5a1	ENSRNOG00000017775	-1.0235
Gal3st3	ENSRNOG00000028743	-1.02378
Kl	ENSRNOG00000001092	-1.02444
Masp1	ENSRNOG00000001827	-1.02464
Rbm20	ENSRNOG00000014705	-1.02478
Ubxn11	ENSRNOG00000015476	-1.02516
Lratd1	ENSRNOG00000004084	-1.0262
Cct6b	ENSRNOG00000007523	-1.02656
Sarm1	ENSRNOG00000010244	-1.02714
AABR07030521.1	ENSRNOG00000042833	-1.02853
RGD1560146	ENSRNOG00000026169	-1.02943
Tcte1	ENSRNOG00000019961	-1.02983
Akr1c19	ENSRNOG00000038319	-1.03177
Ccdc153	ENSRNOG00000039086	-1.03196
Atp1b2	ENSRNOG00000011227	-1.03243
Shank3	ENSRNOG00000052296	-1.03507
Npr3	ENSRNOG00000019184	-1.03619
Rsph3	ENSRNOG00000018762	-1.03851
Tek	ENSRNOG00000008587	-1.04102
Gas2l2	ENSRNOG00000047546	-1.04387
Rab6b	ENSRNOG00000009198	-1.04404
Fam167a	ENSRNOG00000011316	-1.04443
Lrrc51	ENSRNOG00000020124	-1.04489
Ttll7	ENSRNOG00000031997	-1.04521
Cacna1d	ENSRNOG00000013147	-1.0484
Nek5	ENSRNOG00000048769	-1.0485
Kcnh3	ENSRNOG00000057315	-1.04998
Fam222a	ENSRNOG00000001198	-1.05058
Garem2	ENSRNOG00000048004	-1.05122
Itk	ENSRNOG00000006860	-1.05377
Marc1	ENSRNOG00000004101	-1.05775
Lrguk	ENSRNOG00000008775	-1.05822
Ccm2l	ENSRNOG00000009191	-1.05889
Fras1	ENSRNOG00000002053	-1.05906
Niban3	ENSRNOG00000039357	-1.05959
Rsph4a	ENSRNOG00000049696	-1.06146
Gsn	ENSRNOG00000018991	-1.06161
Plagl1	ENSRNOG00000025587	-1.06199
LOC103693323	ENSRNOG00000003349	-1.06247
LOC100134871	ENSRNOG00000061299	-1.06369
Dnai1	ENSRNOG00000013734	-1.06405
Gnao1	ENSRNOG00000019482	-1.06475
Bank1	ENSRNOG00000032247	-1.06569
Ptpru	ENSRNOG00000013515	-1.06808
Mfsd4a	ENSRNOG00000024657	-1.06942
Ccdc3	ENSRNOG00000017933	-1.06999
Lgi1	ENSRNOG00000014758	-1.0703
Baiap3	ENSRNOG00000017893	-1.07134
Rgs22	ENSRNOG00000025551	-1.07167
Cfap73	ENSRNOG00000056407	-1.07227
LOC502684	ENSRNOG00000023721	-1.0723
Selenbp1	ENSRNOG00000047158	-1.07298
Id4	ENSRNOG00000016099	-1.07402
Nrarp	ENSRNOG00000009354	-1.07431
Drc7	ENSRNOG00000025860	-1.07521
Srgap3	ENSRNOG00000006509	-1.07699
Csrp2	ENSRNOG00000003772	-1.07729
Sox5	ENSRNOG00000027869	-1.07831
Cfap45	ENSRNOG00000008492	-1.0786
Il12rb1	ENSRNOG00000019216	-1.07905
Ptprb	ENSRNOG00000055293	-1.08185
Mapt	ENSRNOG00000005133	-1.0829
Kcnh2	ENSRNOG00000009872	-1.08587
Cfap99	ENSRNOG00000058434	-1.0863
Cdh4	ENSRNOG00000052405	-1.08648
Epb41l4b	ENSRNOG00000056550	-1.08884
Matn2	ENSRNOG00000006060	-1.09002
Tsga10	ENSRNOG00000058681	-1.09147
Fam227a	ENSRNOG00000021795	-1.09199
Lrrc10b	ENSRNOG00000030180	-1.09337
Cr2	ENSRNOG00000034164	-1.09384
Ehd3	ENSRNOG00000007744	-1.09409
Chst15	ENSRNOG00000016267	-1.09414
Iqub	ENSRNOG00000021729	-1.09539
Spata18	ENSRNOG00000002120	-1.0973
Slc25a33	ENSRNOG00000016949	-1.10185
Kcp	ENSRNOG00000021855	-1.10195
Wdr49	ENSRNOG00000024628	-1.10399
Slc4a8	ENSRNOG00000028879	-1.10423
Cspg4	ENSRNOG00000017208	-1.10504
AABR07071287.1	ENSRNOG00000031523	-1.10533
Sh3rf2	ENSRNOG00000018780	-1.10654
Doc2b	ENSRNOG00000060054	-1.10736
Ttc29	ENSRNOG00000012342	-1.10797
Tex26	ENSRNOG00000000905	-1.10799
T2	ENSRNOG00000024172	-1.10802
Plce1	ENSRNOG00000014276	-1.10846
Tmod2	ENSRNOG00000010447	-1.1094
Spire2	ENSRNOG00000016920	-1.10964
Ak7	ENSRNOG00000055714	-1.11029
Ccdc30	ENSRNOG00000008560	-1.11066
Map1b	ENSRNOG00000017428	-1.11068
Rsph1	ENSRNOG00000057862	-1.11084
Igf2	ENSRNOG00000020369	-1.11107
Dll4	ENSRNOG00000014011	-1.11112
Hoxa4	ENSRNOG00000027365	-1.11152
AABR07007068.1	ENSRNOG00000017438	-1.11196
Adra1a	ENSRNOG00000009522	-1.11223
Hbb	ENSRNOG00000058105	-1.11236
B3gnt5	ENSRNOG00000046258	-1.11274
Lpar3	ENSRNOG00000015260	-1.1128
Srcin1	ENSRNOG00000011475	-1.11484
Phex	ENSRNOG00000023440	-1.11546
Lrriq4	ENSRNOG00000009004	-1.11599
Zmynd10	ENSRNOG00000021602	-1.11616
Cfap100	ENSRNOG00000017959	-1.11658
Ppp1r32	ENSRNOG00000020620	-1.11671
Usp2	ENSRNOG00000006663	-1.11748
Adcy5	ENSRNOG00000002229	-1.11779
Hba-a1	ENSRNOG00000029886	-1.118
Acer2	ENSRNOG00000007637	-1.12061
Kif4a	ENSRNOG00000038035	-1.12112
Agbl3	ENSRNOG00000010397	-1.12196
Synm	ENSRNOG00000014030	-1.12276
Wdr66	ENSRNOG00000001342	-1.1243
Ogn	ENSRNOG00000047786	-1.12457
Atp2b4	ENSRNOG00000003031	-1.12481
Xkr4	ENSRNOG00000027276	-1.12487
Cav1	ENSRNOG00000056836	-1.12587
Map10	ENSRNOG00000028652	-1.1272
Pdzd2	ENSRNOG00000013140	-1.12847
Ppargc1a	ENSRNOG00000004473	-1.12912
Drc1	ENSRNOG00000024905	-1.13017
Casc1	ENSRNOG00000027630	-1.13177
Pde2a	ENSRNOG00000019560	-1.13201
Rfx2	ENSRNOG00000045846	-1.13275
Wdr38	ENSRNOG00000014102	-1.13348
Cabcoco1	ENSRNOG00000000634	-1.1336
Rftn2	ENSRNOG00000015594	-1.13473
Galnt15	ENSRNOG00000019718	-1.1359
AABR07030901.1	ENSRNOG00000055889	-1.13716
Dnaaf3	ENSRNOG00000038600	-1.13719
Mamdc2	ENSRNOG00000024620	-1.13926
Fam183a	ENSRNOG00000002873	-1.14154
Scin	ENSRNOG00000004498	-1.14168
Lrrc71	ENSRNOG00000014937	-1.14492
Ccdc40	ENSRNOG00000059401	-1.14586
Rbm24	ENSRNOG00000046547	-1.14699
Rfx8	ENSRNOG00000058243	-1.14938
Ak9	ENSRNOG00000037688	-1.15099
Cd163	ENSRNOG00000010253	-1.15178
Ttll3	ENSRNOG00000009032	-1.15234
Tekt5	ENSRNOG00000002571	-1.15436
Cyp4b1	ENSRNOG00000055078	-1.15576
Grin2d	ENSRNOG00000021063	-1.1567
Alas2	ENSRNOG00000000167	-1.15685
Chst3	ENSRNOG00000000572	-1.15758
Tgfbr3	ENSRNOG00000002093	-1.15972
Podnl1	ENSRNOG00000006741	-1.1608
Aldh3a1	ENSRNOG00000002331	-1.16082
Cped1	ENSRNOG00000021840	-1.16165
Lrriq1	ENSRNOG00000004564	-1.16198
Hba-a2	ENSRNOG00000047321	-1.16225
Camk4	ENSRNOG00000020478	-1.16321
Slc13a4	ENSRNOG00000011184	-1.16377
Lrrn3	ENSRNOG00000006368	-1.16405
Atp7b	ENSRNOG00000012878	-1.17016
Sult5a1	ENSRNOG00000015695	-1.17026
Cpe	ENSRNOG00000043387	-1.17172
LOC103691744_1	ENSRNOG00000010658	-1.17443
Bbof1	ENSRNOG00000011376	-1.18049
Sphkap	ENSRNOG00000016388	-1.18193
Sntn	ENSRNOG00000027383	-1.18272
Cap2	ENSRNOG00000043350	-1.1836
Nexn	ENSRNOG00000012512	-1.18497
Cfap206	ENSRNOG00000009061	-1.18502
Robo2	ENSRNOG00000029598	-1.18843
Acsm5	ENSRNOG00000031211	-1.18912
Vwa3a	ENSRNOG00000025110	-1.19064
Lrrc34	ENSRNOG00000027935	-1.19308
Ldlrad1	ENSRNOG00000037795	-1.19439
Rgs6	ENSRNOG00000008082	-1.19672
Ttll9	ENSRNOG00000008596	-1.20023
Cytl1	ENSRNOG00000028108	-1.20188
Hmgcs2	ENSRNOG00000019120	-1.20287
Clec18a	ENSRNOG00000022721	-1.20624
Sptb	ENSRNOG00000006911	-1.20697
Kcnk3	ENSRNOG00000009790	-1.20983
Hbb-bs	ENSRNOG00000047098	-1.21059
Fam216b	ENSRNOG00000021943	-1.2115
Dscaml1	ENSRNOG00000016502	-1.21481
Kif19	ENSRNOG00000003105	-1.21709
Fbxl13	ENSRNOG00000043035	-1.21717
Tnfrsf19	ENSRNOG00000014265	-1.2193
Fank1	ENSRNOG00000018327	-1.21941
Arhgef37	ENSRNOG00000025502	-1.2204
Auts2	ENSRNOG00000000885	-1.22104
Myh11	ENSRNOG00000057880	-1.22138
Kcnip3	ENSRNOG00000014152	-1.22139
Tubb4a	ENSRNOG00000047505	-1.22298
Lrrc66	ENSRNOG00000026585	-1.2238
Fam81a	ENSRNOG00000057501	-1.23007
Myocd	ENSRNOG00000003669	-1.2316
Ccl11	ENSRNOG00000007335	-1.23378
Antxr1	ENSRNOG00000008678	-1.23551
AABR07069466.1	ENSRNOG00000026979	-1.2376
Togaram2	ENSRNOG00000026344	-1.23838
Tbxt	ENSRNOG00000012229	-1.23897
Ect2l	ENSRNOG00000055142	-1.24003
Avil	ENSRNOG00000050419	-1.2416
Tppp3	ENSRNOG00000016890	-1.24177
Eno4	ENSRNOG00000018310	-1.24249
AABR07056636.1	ENSRNOG00000029837	-1.24262
Foxc1	ENSRNOG00000017800	-1.24389
Lepr	ENSRNOG00000023664	-1.24548
Mns1	ENSRNOG00000057867	-1.24586
Mak	ENSRNOG00000015101	-1.24646
Cacna1h	ENSRNOG00000033893	-1.24784
Dclk3	ENSRNOG00000033026	-1.24831
Efhd1	ENSRNOG00000015596	-1.24951
Mylk3	ENSRNOG00000017546	-1.25288
Cnn1	ENSRNOG00000027736	-1.25302
Ddc	ENSRNOG00000004327	-1.25331
AABR07030603.1	ENSRNOG00000050188	-1.25375
Csrnp3	ENSRNOG00000005359	-1.2538
Emid1	ENSRNOG00000033575	-1.25394
Galnt16	ENSRNOG00000004589	-1.25448
Apobec4	ENSRNOG00000028089	-1.25678
Cdhr1	ENSRNOG00000013330	-1.25685
Dtx1	ENSRNOG00000050848	-1.2605
P2rx1	ENSRNOG00000017606	-1.26144
Pfkfb1	ENSRNOG00000000165	-1.26249
Frmpd4	ENSRNOG00000004118	-1.2638
Susd2	ENSRNOG00000033389	-1.26401
Dnah6	ENSRNOG00000015581	-1.26484
Elmod1	ENSRNOG00000009054	-1.27043
Mapk15	ENSRNOG00000009336	-1.27472
Fam20a	ENSRNOG00000003969	-1.27535
Kcnmb4	ENSRNOG00000054458	-1.27544
Trank1	ENSRNOG00000021091	-1.27548
Actc1	ENSRNOG00000008536	-1.27691
Klf15	ENSRNOG00000017808	-1.28049
Tsnaxip1	ENSRNOG00000018954	-1.28072
Aoc3	ENSRNOG00000051307	-1.2823
Ccdc180	ENSRNOG00000010412	-1.28289
Spag17	ENSRNOG00000037196	-1.29679
Slc2a10	ENSRNOG00000025384	-1.29809
Slco1a2	ENSRNOG00000031249	-1.2982
Cdo1	ENSRNOG00000000158	-1.30255
Ccdc173	ENSRNOG00000052954	-1.30354
Tp73	ENSRNOG00000024707	-1.30393
Sncaip	ENSRNOG00000018254	-1.30411
Xrra1	ENSRNOG00000026503	-1.30527
Scml4	ENSRNOG00000026110	-1.30686
Rassf10	ENSRNOG00000014847	-1.30725
Dnah11	ENSRNOG00000005451	-1.31184
Cd300lg	ENSRNOG00000020837	-1.31187
Igfbpl1	ENSRNOG00000011320	-1.31547
Cdhr3	ENSRNOG00000047455	-1.31591
Dnah1	ENSRNOG00000026914	-1.31596
Lims2	ENSRNOG00000016021	-1.31727
Kif5c	ENSRNOG00000004680	-1.31763
Bmp3	ENSRNOG00000002381	-1.31775
Camk2a	ENSRNOG00000018712	-1.31943
Mdh1b	ENSRNOG00000012891	-1.32007
LOC102554838	ENSRNOG00000031595	-1.32689
Ttll10	ENSRNOG00000020132	-1.32706
Pcdhb12	ENSRNOG00000033719	-1.32806
Spef2	ENSRNOG00000058275	-1.3291
Armh1	ENSRNOG00000031494	-1.33184
Adra2b	ENSRNOG00000013887	-1.33203
Hsd11b2	ENSRNOG00000017084	-1.33643
Clip4	ENSRNOG00000008806	-1.3382
Dlec1	ENSRNOG00000032085	-1.34229
Ubxn10	ENSRNOG00000027731	-1.34244
Chrdl1	ENSRNOG00000004330	-1.3426
Ackr2	ENSRNOG00000019472	-1.3455
Scube2	ENSRNOG00000013123	-1.34873
Stox1	ENSRNOG00000023712	-1.35119
Zfp82_1	ENSRNOG00000053115	-1.35175
Sirpb3	ENSRNOG00000026061	-1.35216
AABR07068007.2	ENSRNOG00000054475	-1.3532
Sox2	ENSRNOG00000012199	-1.35368
Dnah12	ENSRNOG00000059865	-1.35388
Kndc1	ENSRNOG00000027240	-1.35549
RGD1307443	ENSRNOG00000018141	-1.35695
Trpm5	ENSRNOG00000020484	-1.35776
Nmnat2	ENSRNOG00000027697	-1.35824
Cacnb4	ENSRNOG00000007666	-1.36034
B4galnt4	ENSRNOG00000053075	-1.36054
LOC100910996	ENSRNOG00000060879	-1.3648
Prom2	ENSRNOG00000014710	-1.36704
Ntrk1	ENSRNOG00000013953	-1.37304
Magi2	ENSRNOG00000013962	-1.37513
AABR07008439.1	ENSRNOG00000052173	-1.37649
Fam92b	ENSRNOG00000021714	-1.37657
Lyve1	ENSRNOG00000026902	-1.37785
Scart1	ENSRNOG00000018978	-1.38013
Wnk2	ENSRNOG00000016684	-1.382
Cox8b	ENSRNOG00000014656	-1.38653
Rhbdl1	ENSRNOG00000019921	-1.38741
Trim54	ENSRNOG00000006146	-1.3894
Rp1	ENSRNOG00000008807	-1.39487
Alox15	ENSRNOG00000019183	-1.39874
AABR07005985.1	ENSRNOG00000027374	-1.40004
Shank2	ENSRNOG00000050206	-1.40312
Chd5	ENSRNOG00000011268	-1.40367
Cfap65	ENSRNOG00000056996	-1.40571
Lamc3	ENSRNOG00000059507	-1.40783
Cyp2e1	ENSRNOG00000012458	-1.40884
Klhl31	ENSRNOG00000006224	-1.41402
Dpy19l2	ENSRNOG00000045585	-1.41849
Chrm2	ENSRNOG00000046972	-1.4206
AC103535.1	ENSRNOG00000053840	-1.42246
Lrrc2	ENSRNOG00000030688	-1.42575
Fmo3	ENSRNOG00000003620	-1.4262
RGD1562029	ENSRNOG00000022723	-1.42639
Ackr4	ENSRNOG00000011478	-1.42747
Ccdc78	ENSRNOG00000022331	-1.42795
Plin4	ENSRNOG00000047046	-1.42841
Corin	ENSRNOG00000002302	-1.42944
Ccdc24	ENSRNOG00000019586	-1.43137
Syt6	ENSRNOG00000019163	-1.43182
Rtbdn	ENSRNOG00000043215	-1.43212
Fbln2	ENSRNOG00000007338	-1.43294
Dcdc5	ENSRNOG00000022178	-1.44243
Sstr1	ENSRNOG00000048145	-1.44613
Pclo	ENSRNOG00000005726	-1.44994
Jhy	ENSRNOG00000008138	-1.45751
Ttll6	ENSRNOG00000004939	-1.45931
Dnali1	ENSRNOG00000024957	-1.46561
Ttll2	ENSRNOG00000033901	-1.46708
Lca5	ENSRNOG00000009580	-1.47941
Kcnmb2	ENSRNOG00000010094	-1.48074
Mpz	ENSRNOG00000003171	-1.48366
Slc6a17	ENSRNOG00000050090	-1.48611
Ccdc187	ENSRNOG00000027392	-1.48759
AABR07006278.1	ENSRNOG00000020980	-1.48839
Dnah2	ENSRNOG00000052688	-1.49139
Myom2	ENSRNOG00000011754	-1.49508
Cmya5	ENSRNOG00000023803	-1.49697
Timp4	ENSRNOG00000007955	-1.49785
Dnah7	ENSRNOG00000060984	-1.50357
Acsm2	ENSRNOG00000042084	-1.50441
Ttpa	ENSRNOG00000007139	-1.50747
Rhd	ENSRNOG00000017130	-1.50991
Dmrt3	ENSRNOG00000016284	-1.51173
Rprml	ENSRNOG00000028436	-1.51257
Fbp1	ENSRNOG00000017597	-1.51368
Hydin	ENSRNOG00000017178	-1.51587
Fxyd7	ENSRNOG00000021067	-1.51823
Ribc2	ENSRNOG00000033502	-1.52058
Itprid1	ENSRNOG00000012165	-1.5218
Wnt2b	ENSRNOG00000014385	-1.52365
Actn2	ENSRNOG00000017833	-1.52365
Cpne4	ENSRNOG00000026577	-1.52762
PCOLCE2	ENSRNOG00000046848	-1.53402
Cyp2f4	ENSRNOG00000032805	-1.53677
LOC103690116	ENSRNOG00000039560	-1.53948
Igfbp3	ENSRNOG00000061910	-1.54344
LOC102554658	ENSRNOG00000037668	-1.54492
Wdr93	ENSRNOG00000026514	-1.54748
Slc7a10	ENSRNOG00000010938	-1.54835
Gnaz	ENSRNOG00000001313	-1.55617
Npy4r	ENSRNOG00000061026	-1.55704
Acvr1c	ENSRNOG00000004828	-1.55707
AABR07028488.1	ENSRNOG00000049614	-1.56105
Dnah9	ENSRNOG00000004171	-1.56631
Myom1	ENSRNOG00000057701	-1.56941
Ctxn1	ENSRNOG00000001057	-1.56991
Penk	ENSRNOG00000008943	-1.58288
Ace3	ENSRNOG00000007467	-1.58293
Scn8a	ENSRNOG00000005309	-1.59219
Col6a4	ENSRNOG00000031782	-1.60075
AABR07056633.1	ENSRNOG00000024494	-1.61057
AABR07058658.1	ENSRNOG00000032311	-1.61984
Elfn1	ENSRNOG00000022767	-1.62044
Ntf3	ENSRNOG00000019716	-1.62084
Fam13a	ENSRNOG00000007947	-1.62342
Ptgfr	ENSRNOG00000046468	-1.6283
AC120568.1	ENSRNOG00000013605	-1.63688
AABR07052894.1	ENSRNOG00000047740	-1.64997
Tesc	ENSRNOG00000001128	-1.65193
Ihh	ENSRNOG00000018059	-1.65976
Chrm3	ENSRNOG00000049410	-1.66514
Dnah5	ENSRNOG00000048363	-1.66791
Ecrg4	ENSRNOG00000023576	-1.6691
Insrr	ENSRNOG00000057702	-1.66997
MGC94891	ENSRNOG00000011243	-1.67477
Popdc3	ENSRNOG00000047102	-1.67666
LOC100361866	ENSRNOG00000031445	-1.6885
Cyp2a1	ENSRNOG00000020817	-1.69533
Esrrg	ENSRNOG00000002593	-1.69553
Wbp11l1	ENSRNOG00000049593	-1.69697
Adgrv1	ENSRNOG00000016306	-1.70085
Adcy1	ENSRNOG00000059479	-1.70135
Ncs1	ENSRNOG00000008761	-1.70865
Ryr2	ENSRNOG00000017060	-1.72246
Hcn4	ENSRNOG00000009450	-1.72288
Sncg	ENSRNOG00000058006	-1.72382
Adhfe1	ENSRNOG00000007069	-1.72641
Ttc34	ENSRNOG00000024526	-1.72913
Unc5d	ENSRNOG00000011858	-1.74404
Gria1	ENSRNOG00000045816	-1.76113
Fmo2	ENSRNOG00000003510	-1.77088
Cntfr	ENSRNOG00000047307	-1.77762
Gnat2	ENSRNOG00000019296	-1.78047
Hamp	ENSRNOG00000021029	-1.78613
Lmo3	ENSRNOG00000047450	-1.78996
Cux2	ENSRNOG00000001259	-1.79083
Smpx	ENSRNOG00000007495	-1.79426
AABR07005983.1	ENSRNOG00000005953	-1.81088
Galnt14	ENSRNOG00000007951	-1.82307
Fam107a	ENSRNOG00000033261	-1.84429
LOC100911951	ENSRNOG00000050450	-1.84559
Erbb4	ENSRNOG00000014248	-1.84727
AABR07024637.1	ENSRNOG00000029131	-1.85052
Krtap17-1	ENSRNOG00000042473	-1.8537
Cyp4a8	ENSRNOG00000008842	-1.8583
NEWGENE_1589866	ENSRNOG00000058883	-1.85833
Ccdc151	ENSRNOG00000013263	-1.86689
Mapk10	ENSRNOG00000002079	-1.87192
Kcnj11	ENSRNOG00000021128	-1.87622
Esm1	ENSRNOG00000010797	-1.88184
Atp1a2	ENSRNOG00000007290	-1.93377
Mlc1	ENSRNOG00000032871	-1.95985
AABR07005597.1	ENSRNOG00000050426	-1.97954
4930444P10Rik	ENSRNOG00000047310	-1.97989
Unc45b	ENSRNOG00000009466	-1.98129
Krt2	ENSRNOG00000009563	-2.00283
Nrap	ENSRNOG00000016714	-2.00862
Asb15	ENSRNOG00000006365	-2.04329
Ca12	ENSRNOG00000017766	-2.07013
Xirp2	ENSRNOG00000034258	-2.08205
Ccdc89	ENSRNOG00000048071	-2.10409
Add2	ENSRNOG00000015903	-2.10715
Olr292_1	ENSRNOG00000036647	-2.12673
Syndig1	ENSRNOG00000031536	-2.14498
Bmp15	ENSRNOG00000002984	-2.14598
Wdr95	ENSRNOG00000000904	-2.19745
Trmt9b	ENSRNOG00000011253	-2.19874
Pcdhga1	ENSRNOG00000039463	-2.19996
Slc26a3	ENSRNOG00000006878	-2.23235
Sh2d7	ENSRNOG00000023870	-2.32032
Lmntd1	ENSRNOG00000015910	-2.32762
Cdh9	ENSRNOG00000033837	-2.33115
Acoxl	ENSRNOG00000016179	-2.35504
M1ap	ENSRNOG00000007288	-2.40699
Nwd2	ENSRNOG00000051837	-2.48571
Serpinb10	ENSRNOG00000002417	-2.52483
Hapln2	ENSRNOG00000018870	-2.55279
Ephx4	ENSRNOG00000023389	-2.56559
Chrna4	ENSRNOG00000011202	-2.61221
RGD1562492	ENSRNOG00000037219	-2.63375
Ccdc116	ENSRNOG00000001860	-2.67224
Kcna6	ENSRNOG00000052486	-2.70598
Fbxo40	ENSRNOG00000002459	-2.73049
Rorb	ENSRNOG00000013413	-2.76677
Tenm2	ENSRNOG00000027341	-2.77352
Clcn2	ENSRNOG00000001742	-2.87835
Gpr50	ENSRNOG00000011335	-2.88161
Kcne5	ENSRNOG00000019176	-2.89318
LOC685767	ENSRNOG00000053301	-2.89894
Hif3a	ENSRNOG00000017198	-2.93087
Cct8l1_2	ENSRNOG00000047114	-2.95784
Slc6a15	ENSRNOG00000027468	-2.97877
Upk1a	ENSRNOG00000024331	-3.25394
Cdh19	ENSRNOG00000029841	-3.40752
Dlk1	ENSRNOG00000019584	-3.68539
LOC100911615/Pnpla2	ENSRNOG00000047551	-3.94486
Myl2	ENSRNOG00000030848	-3.95034
LOC108348044/Rin1	ENSRNOG00000020133	-4.98523
Yme1l1	ENSRNOG00000017100	-6.17839
Ndst2	ENSRNOG00000027171	-6.19474
Snip1	ENSRNOG00000024889	-8.22477
Rps27a_2	ENSRNOG00000004426	-12.1238

## Sheet: Table S3c All DEGs (Y-2)
Table S3. All significantly differentially expressed genes (DEGs) in MWCNT-treated rat lungs at each time point
Table S3c. All DEGs in MWCNT-treated rat lungs at Year 2
Official Gene Symbol	Ensembl Gene ID	Log₂ fold change
Nlrp6_1	ENSRNOG00000045677	9.38767
Spp1	ENSRNOG00000043451	9.20327
Ankrd34c	ENSRNOG00000013937	8.80256
Mt3	ENSRNOG00000018958	8.72398
Anks1b	ENSRNOG00000024870	8.57126
Mc5r	ENSRNOG00000016685	8.51414
Mmp7	ENSRNOG00000010507	8.26452
Lpo	ENSRNOG00000008422	8.21918
Faim_1	ENSRNOG00000030069	8.0704
Csap1	ENSRNOG00000049151	8.06352
Tpsab1	ENSRNOG00000024181	7.85845
RGD1564571	ENSRNOG00000042795	7.47411
Ccl1	ENSRNOG00000021851	7.26465
Srd5a2	ENSRNOG00000027042	7.16165
Mrgprx2	ENSRNOG00000033665	6.73938
Sctr	ENSRNOG00000049766	6.73505
LOC100910526/Sult1c2	ENSRNOG00000050885	6.6727
A2m	ENSRNOG00000028896	6.53853
Aox4	ENSRNOG00000014555	6.28545
Mmp12	ENSRNOG00000030187	6.21976
Retnla	ENSRNOG00000001955	6.17425
Tpsb2	ENSRNOG00000018611	6.16392
1700066B19Rik	ENSRNOG00000039592	6.05445
Tmem72	ENSRNOG00000023340	5.94737
AABR07051733.1	ENSRNOG00000057280	5.94584
Mcpt1l1	ENSRNOG00000053494	5.91319
Slc26a4	ENSRNOG00000058692	5.84532
AABR07035791.1	ENSRNOG00000049592	5.77645
Tnn	ENSRNOG00000002548	5.70687
LOC103689999	ENSRNOG00000046051	5.64583
Tph1	ENSRNOG00000011672	5.62105
AABR07051707.1	ENSRNOG00000057618	5.56729
Bpifb2	ENSRNOG00000012197	5.5193
Scn10a	ENSRNOG00000032473	5.46366
LOC691352	ENSRNOG00000038422	5.44536
Cpa3	ENSRNOG00000011181	5.29841
Grin3a	ENSRNOG00000005723	5.18472
Fabp4	ENSRNOG00000010805	5.17893
Padi1	ENSRNOG00000007067	5.14863
Psca	ENSRNOG00000061376	5.14786
Atg9b	ENSRNOG00000023449	5.0116
Prlhr	ENSRNOG00000009922	5.00755
LOC100911672	ENSRNOG00000060594	4.99861
Atp1a3	ENSRNOG00000020263	4.99838
Adamts18	ENSRNOG00000011575	4.96651
Calca	ENSRNOG00000011130	4.95287
Dmkn	ENSRNOG00000055934	4.94644
Atp6v0d2	ENSRNOG00000006926	4.87156
Pla2g4e	ENSRNOG00000024904	4.86879
Gja3	ENSRNOG00000008847	4.86774
Krt14	ENSRNOG00000003899	4.84463
C1qtnf3	ENSRNOG00000018570	4.8382
Orm1	ENSRNOG00000007886	4.83794
AABR07065802.1	ENSRNOG00000047599	4.81271
Cd5l	ENSRNOG00000023068	4.81114
Cxcl6	ENSRNOG00000002843	4.81025
Itih1	ENSRNOG00000033386	4.7938
Syt13	ENSRNOG00000008000	4.72828
Ctsk	ENSRNOG00000021155	4.70639
Magea9	ENSRNOG00000023016	4.67696
Marco	ENSRNOG00000049303	4.65912
Trh	ENSRNOG00000011824	4.62246
Lilrb3	ENSRNOG00000046683	4.6123
Mrgprb3	ENSRNOG00000028982	4.58392
Cma1	ENSRNOG00000020563	4.58082
AABR07065792.2	ENSRNOG00000048696	4.55993
Siglec15	ENSRNOG00000033588	4.52551
Ccl9	ENSRNOG00000028548	4.44759
Chrm4	ENSRNOG00000017556	4.43562
Gcgr	ENSRNOG00000036692	4.41999
Vat1l	ENSRNOG00000011989	4.40165
Radx	ENSRNOG00000011120	4.39192
Cpne5	ENSRNOG00000000522	4.39076
Il24	ENSRNOG00000004470	4.33588
Fcrlb	ENSRNOG00000003135	4.33552
Cadm4	ENSRNOG00000024243	4.24284
Fermt1	ENSRNOG00000021274	4.2421
Slc18a1	ENSRNOG00000011992	4.23926
LOC103690016	ENSRNOG00000019082	4.23376
Tmem45b	ENSRNOG00000008515	4.2277
Gdap1l1	ENSRNOG00000008790	4.22738
AABR07067023.1	ENSRNOG00000058742	4.21192
AABR07060795.1	ENSRNOG00000038376	4.1728
Brs3	ENSRNOG00000000873	4.1696
Scg2	ENSRNOG00000015055	4.16784
Ms4a2	ENSRNOG00000020993	4.16228
LOC100909700	ENSRNOG00000048783	4.13883
Gpnmb	ENSRNOG00000008816	4.13407
Chga	ENSRNOG00000052549	4.13347
Tm4sf19	ENSRNOG00000001757	4.12569
Clec4a	ENSRNOG00000010045	4.1014
AABR07040284.1	ENSRNOG00000059352	4.09769
Bpifa1	ENSRNOG00000013859	4.08825
Mab21l3	ENSRNOG00000016044	4.05484
Thbs2	ENSRNOG00000010529	4.02099
Ccl7	ENSRNOG00000000239	4.02084
Asic2	ENSRNOG00000058308	4.01201
Ptk6	ENSRNOG00000012987	3.98681
Ccn4	ENSRNOG00000007078	3.94077
Esr1	ENSRNOG00000019358	3.93343
AABR07060992.1	ENSRNOG00000045682	3.93007
Pde10a	ENSRNOG00000011310	3.92293
Chia	ENSRNOG00000033162	3.91217
Ptprn	ENSRNOG00000019587	3.90801
AABR07065688.1	ENSRNOG00000055807	3.89424
AABR07065789.2	ENSRNOG00000031918	3.87027
Gria2	ENSRNOG00000054204	3.86849
Prss22	ENSRNOG00000039698	3.84415
Kctd4	ENSRNOG00000050996	3.83396
LOC689757	ENSRNOG00000037076	3.83329
Agtr2	ENSRNOG00000050006	3.82415
Hrh4	ENSRNOG00000016887	3.82398
AABR07065792.1	ENSRNOG00000042197	3.82116
Chgb	ENSRNOG00000021269	3.81668
Diras1	ENSRNOG00000029738	3.79477
Fcer1a	ENSRNOG00000009177	3.78023
Slamf9	ENSRNOG00000008045	3.75271
Bpifb5	ENSRNOG00000025238	3.7366
Rimbp3	ENSRNOG00000030452	3.7241
Gjb6	ENSRNOG00000022116	3.72281
Ccl2	ENSRNOG00000007159	3.72031
Adora3	ENSRNOG00000015788	3.71835
Snap25	ENSRNOG00000006037	3.69033
Slc7a11	ENSRNOG00000010210	3.68454
AABR07051733.3	ENSRNOG00000058552	3.68037
Vtcn1	ENSRNOG00000015279	3.66507
LOC100911625	ENSRNOG00000048365	3.64193
Cfi	ENSRNOG00000053400	3.62189
Fstl4	ENSRNOG00000006565	3.60977
Rab7b	ENSRNOG00000039754	3.60596
Ppp1r17	ENSRNOG00000012235	3.58994
Steap3	ENSRNOG00000049471	3.56781
Tnfsf9	ENSRNOG00000045595	3.56676
AABR07060957.1	ENSRNOG00000054012	3.55667
LOC100911272	ENSRNOG00000048253	3.538
LOC103689942	ENSRNOG00000050105	3.53293
RGD1562392	ENSRNOG00000031833	3.52151
Ptprv	ENSRNOG00000005277	3.51691
Galnt5	ENSRNOG00000004645	3.49724
Tmprss9	ENSRNOG00000032429	3.48586
Gsdma	ENSRNOG00000007943	3.47616
Folr2	ENSRNOG00000019890	3.46979
Inhba	ENSRNOG00000014320	3.46381
Adora1	ENSRNOG00000003442	3.46143
Gas2l3	ENSRNOG00000025198	3.43348
Sfrp5	ENSRNOG00000014940	3.42765
Mcpt8l3	ENSRNOG00000049991	3.40778
AABR07051532.2	ENSRNOG00000049299	3.40535
Tubb3	ENSRNOG00000017209	3.39641
AABR07061087.1	ENSRNOG00000052612	3.38385
Cd300lb	ENSRNOG00000036728	3.35802
AABR07060994.1	ENSRNOG00000060746	3.33235
Pla2g7	ENSRNOG00000025691	3.33134
Rspo3	ENSRNOG00000011568	3.32313
Areg	ENSRNOG00000002754	3.32153
AABR07051550.1	ENSRNOG00000047915	3.31338
C3	ENSRNOG00000046834	3.29706
Fcgr2b	ENSRNOG00000046452	3.28973
Lcn2	ENSRNOG00000013973	3.28174
Ly6i	ENSRNOG00000007137	3.27978
Hk3	ENSRNOG00000026235	3.26771
Tmprss6	ENSRNOG00000000184	3.26273
Krt5	ENSRNOG00000050420	3.26048
Mettl11b	ENSRNOG00000025415	3.26003
Ajap1	ENSRNOG00000050137	3.24865
Scg3	ENSRNOG00000010784	3.24832
Pigz_2	ENSRNOG00000047082	3.24608
Erp27	ENSRNOG00000005787	3.22793
Card14	ENSRNOG00000047367	3.22097
LOC299282	ENSRNOG00000010478	3.21978
Krt17	ENSRNOG00000026371	3.21498
RGD1307182	ENSRNOG00000042230	3.19691
Lama1	ENSRNOG00000017237	3.17946
Mreg	ENSRNOG00000015774	3.15519
Smtnl1	ENSRNOG00000007516	3.15312
Cdh17	ENSRNOG00000015562	3.13897
Ube2ql1	ENSRNOG00000034075	3.13864
Qprt	ENSRNOG00000016980	3.13197
Rasgrf1	ENSRNOG00000014025	3.12371
Fat2	ENSRNOG00000012575	3.12077
Gsg1	ENSRNOG00000008518	3.10088
Ptchd1	ENSRNOG00000003675	3.0784
Cd84	ENSRNOG00000022884	3.07736
Galr3	ENSRNOG00000027060	3.07725
Fcrl2	ENSRNOG00000016164	3.07225
AABR07061068.2	ENSRNOG00000060654	3.06682
Reg3b	ENSRNOG00000006151	3.06006
Muc20	ENSRNOG00000001776	3.05103
Kcnc4	ENSRNOG00000060988	3.04863
Cd68	ENSRNOG00000037563	3.03405
Lgals3	ENSRNOG00000010645	3.03248
Slc37a2	ENSRNOG00000039390	3.03021
Arl14	ENSRNOG00000049827	3.02704
LOC103690070	ENSRNOG00000029029	3.00959
Cd177	ENSRNOG00000022669	3.00408
Hp	ENSRNOG00000014964	2.99115
Gabra4	ENSRNOG00000002336	2.98897
Il1rn	ENSRNOG00000005871	2.97658
AABR07060952.1	ENSRNOG00000061169	2.97058
S100a5	ENSRNOG00000011748	2.96893
Pigz_1	ENSRNOG00000047384	2.96313
Snap91	ENSRNOG00000023861	2.95613
Abcb11	ENSRNOG00000050860	2.94161
Serpine2	ENSRNOG00000015461	2.93461
Thy1	ENSRNOG00000006604	2.92088
AABR07065699.3	ENSRNOG00000057421	2.916
Ereg	ENSRNOG00000002771	2.91328
Ccl12	ENSRNOG00000029768	2.90452
AABR07065768.1	ENSRNOG00000050944	2.90406
Ptcd3	ENSRNOG00000009484	2.90073
Ccr8	ENSRNOG00000026759	2.89969
Rgs1	ENSRNOG00000003895	2.87811
Glis1	ENSRNOG00000000138	2.86155
C4bpa	ENSRNOG00000004062	2.85757
AABR07040288.1	ENSRNOG00000047560	2.85467
LOC103689951	ENSRNOG00000048049	2.85465
AABR07065656.3	ENSRNOG00000049243	2.8526
Siglec1	ENSRNOG00000021243	2.8332
AABR07072262.1	ENSRNOG00000060328	2.82477
C1qa	ENSRNOG00000012807	2.82125
LOC100911796	ENSRNOG00000050743	2.81642
A2ml1	ENSRNOG00000007247	2.81266
Rhbdl2	ENSRNOG00000026592	2.80732
Trem2	ENSRNOG00000013578	2.80572
Gabrr1	ENSRNOG00000007603	2.80389
Dsg1	ENSRNOG00000016853	2.80115
Duox1	ENSRNOG00000033348	2.79419
Myo7b	ENSRNOG00000015035	2.79111
Mcpt8l2	ENSRNOG00000049096	2.7586
LOC497796	ENSRNOG00000060241	2.75716
Unc5cl	ENSRNOG00000046601	2.74402
Lilrb4	ENSRNOG00000027811	2.74046
AABR07065676.1	ENSRNOG00000056495	2.74026
Mylk2	ENSRNOG00000008235	2.73897
Gm2a	ENSRNOG00000052219	2.73461
AABR07034730.2	ENSRNOG00000050898	2.72484
Cybb	ENSRNOG00000003622	2.7163
Cyp2d3	ENSRNOG00000029179	2.70624
Clcn4	ENSRNOG00000003533	2.69528
AABR07065750.2	ENSRNOG00000050118	2.68962
Zscan10	ENSRNOG00000021782	2.68763
Aldh1l2	ENSRNOG00000008586	2.68632
Slc13a3	ENSRNOG00000019118	2.68606
Bhlhe41	ENSRNOG00000048961	2.68216
Prkar1b	ENSRNOG00000028733	2.68095
Defb3	ENSRNOG00000038126	2.64995
Xylt1	ENSRNOG00000056658	2.64733
Rassf4	ENSRNOG00000013526	2.63918
Prlr	ENSRNOG00000057557	2.6377
Smpdl3a	ENSRNOG00000000815	2.62708
AABR07051533.1	ENSRNOG00000038274	2.6142
Tmem171	ENSRNOG00000015449	2.60463
Tmem59l	ENSRNOG00000022432	2.5941
Slc2a5	ENSRNOG00000017693	2.59221
Klk13	ENSRNOG00000022353	2.58776
Slco4a1	ENSRNOG00000053430	2.58384
Lgmn	ENSRNOG00000007089	2.58163
Ascl1	ENSRNOG00000004294	2.58047
Acsbg1	ENSRNOG00000011381	2.57772
Tspan11	ENSRNOG00000054360	2.57336
Ms4a7	ENSRNOG00000020953	2.57052
Cxcl2	ENSRNOG00000002792	2.56945
AABR07065656.5	ENSRNOG00000053719	2.56019
Stap1	ENSRNOG00000002014	2.55571
Hilpda	ENSRNOG00000054999	2.5536
AABR07065781.1	ENSRNOG00000030812	2.55208
Matk	ENSRNOG00000020431	2.54935
Acta1	ENSRNOG00000017786	2.53572
Fcamr	ENSRNOG00000004393	2.53571
Reg3g	ENSRNOG00000006579	2.53539
Dsc3	ENSRNOG00000017159	2.53106
Pgr	ENSRNOG00000006831	2.52913
Pld3	ENSRNOG00000018390	2.52807
Cgref1	ENSRNOG00000007923	2.52669
Cpa4	ENSRNOG00000010463	2.5219
Il18bp	ENSRNOG00000020150	2.51819
C6	ENSRNOG00000024115	2.51074
Cldn6	ENSRNOG00000003648	2.50972
RGD1559482	ENSRNOG00000048771	2.50209
LOC100910446	ENSRNOG00000048248	2.49813
Slc6a12	ENSRNOG00000013547	2.4884
Apoe	ENSRNOG00000018454	2.48459
AABR07065811.1	ENSRNOG00000042569	2.47949
Hpx	ENSRNOG00000018257	2.47845
AABR07060963.2	ENSRNOG00000055428	2.47584
Crispld1	ENSRNOG00000017773	2.47467
AABR07051670.1	ENSRNOG00000047535	2.47322
Capg	ENSRNOG00000013668	2.47091
Itgam	ENSRNOG00000019728	2.4643
F3	ENSRNOG00000011800	2.464
Rgs9	ENSRNOG00000003800	2.46372
Msr1	ENSRNOG00000012779	2.4493
C1qb	ENSRNOG00000012749	2.4395
Blnk	ENSRNOG00000013967	2.43624
LOC103689965	ENSRNOG00000000443	2.43545
Slc47a1	ENSRNOG00000057404	2.43378
Noxo1	ENSRNOG00000025117	2.43207
Atp1b1	ENSRNOG00000002934	2.43181
Slc36a3	ENSRNOG00000021310	2.43109
Tiam1	ENSRNOG00000021569	2.42793
Dhrs9	ENSRNOG00000058568	2.42236
Mcoln3	ENSRNOG00000015024	2.41905
Serpine1	ENSRNOG00000001414	2.41479
Slc7a7	ENSRNOG00000010296	2.4119
Sectm1a	ENSRNOG00000036672	2.40263
Mc2r	ENSRNOG00000016681	2.39652
Syt8	ENSRNOG00000020245	2.39449
Vgf	ENSRNOG00000001416	2.39308
Kcnn4	ENSRNOG00000019440	2.38919
Meis3	ENSRNOG00000021390	2.38871
Pax8	ENSRNOG00000026203	2.38787
Slamf8	ENSRNOG00000008736	2.38376
Arl11	ENSRNOG00000014653	2.38281
Cftr	ENSRNOG00000055103	2.38202
AABR07032097.1	ENSRNOG00000019744	2.37496
Prmt8	ENSRNOG00000053804	2.37468
Serpinf1	ENSRNOG00000003172	2.37157
Pla2g1b	ENSRNOG00000001153	2.36709
AABR07060886.1	ENSRNOG00000047464	2.36669
Cenpu	ENSRNOG00000022261	2.36509
Cd200r1	ENSRNOG00000039048	2.36507
Cldn4	ENSRNOG00000001476	2.36465
Mmp9	ENSRNOG00000017539	2.35247
Serping1	ENSRNOG00000007457	2.34362
AABR07065651.4	ENSRNOG00000050912	2.33055
Cadps	ENSRNOG00000008570	2.32937
AABR07065645.2	ENSRNOG00000047785	2.3269
Dscam	ENSRNOG00000027992	2.32678
AABR07065778.3	ENSRNOG00000048159	2.3242
Bhlha15	ENSRNOG00000025164	2.32081
Sel1l3	ENSRNOG00000004932	2.31877
Sapcd2	ENSRNOG00000013069	2.31528
Btc	ENSRNOG00000002728	2.31319
Dok5	ENSRNOG00000013196	2.31203
AABR07065789.3	ENSRNOG00000058824	2.31007
AABR07034729.1	ENSRNOG00000042193	2.30899
Ptges	ENSRNOG00000006320	2.3072
Tgfbr1	ENSRNOG00000007036	2.30486
AABR07051551.1	ENSRNOG00000048167	2.30476
B3gnt3	ENSRNOG00000018764	2.30451
gene:ENSRNOG00000034190	ENSRNOG00000034190	2.30227
Kng1	ENSRNOG00000030387	2.29636
Ttyh2	ENSRNOG00000024578	2.28609
Ptafr	ENSRNOG00000013231	2.28328
LOC681355	ENSRNOG00000039063	2.28302
Adamts4	ENSRNOG00000003538	2.28209
Daam2	ENSRNOG00000053945	2.28208
Meiob	ENSRNOG00000014711	2.27945
Chi3l1	ENSRNOG00000053272	2.26706
Bcat1	ENSRNOG00000015514	2.2583
Cd72	ENSRNOG00000017485	2.25204
Lingo1	ENSRNOG00000017193	2.25132
Epha7	ENSRNOG00000007030	2.25094
Fcer2	ENSRNOG00000001005	2.24843
St18	ENSRNOG00000006200	2.24834
Dcstamp	ENSRNOG00000004704	2.24354
Eda2r	ENSRNOG00000013018	2.243
Cd300le	ENSRNOG00000042825	2.23692
Tmem86a	ENSRNOG00000013663	2.23133
Vma21	ENSRNOG00000058793	2.22681
Tbxas1	ENSRNOG00000007918	2.22545
Degs2	ENSRNOG00000011716	2.22437
Fabp5	ENSRNOG00000049075	2.22274
Myo5a	ENSRNOG00000058866	2.2224
Slamf6	ENSRNOG00000038286	2.22029
Cd33	ENSRNOG00000037331	2.21696
Susd1	ENSRNOG00000056819	2.21438
S100a9	ENSRNOG00000011483	2.21083
Them5	ENSRNOG00000043445	2.21062
Fam20c	ENSRNOG00000001314	2.2097
Ank1	ENSRNOG00000018241	2.20427
Scn4a	ENSRNOG00000012134	2.20359
Nrcam	ENSRNOG00000004067	2.20337
Frrs1	ENSRNOG00000016351	2.20066
Gdf6	ENSRNOG00000007810	2.19981
Gfap	ENSRNOG00000002919	2.19016
C2	ENSRNOG00000051235	2.18537
Tf	ENSRNOG00000030625	2.18525
Fetub	ENSRNOG00000001806	2.18338
Clec5a	ENSRNOG00000026306	2.18205
AABR07061052.1	ENSRNOG00000056290	2.18198
Rnase9	ENSRNOG00000029516	2.1784
Rarres1	ENSRNOG00000037853	2.17693
Egr2	ENSRNOG00000000640	2.1758
Cilp	ENSRNOG00000029911	2.17205
Clec4a3	ENSRNOG00000010018	2.16256
Tac4	ENSRNOG00000004404	2.16246
Mafb	ENSRNOG00000016037	2.16225
AABR07051533.2	ENSRNOG00000043155	2.16134
Hvcn1	ENSRNOG00000001270	2.1475
Gpr179	ENSRNOG00000029245	2.14675
AABR07065693.3	ENSRNOG00000056285	2.14433
AABR07065815.1	ENSRNOG00000048062	2.12565
Ifi30	ENSRNOG00000019387	2.12537
RGD1565367	ENSRNOG00000026919	2.12524
Kcnk13	ENSRNOG00000047363	2.11901
Lrrn4cl	ENSRNOG00000026302	2.11219
Accsl	ENSRNOG00000042533	2.10925
Pirt	ENSRNOG00000037852	2.10852
Muc1	ENSRNOG00000020539	2.10485
Itgb8	ENSRNOG00000006569	2.10257
Lipa	ENSRNOG00000019077	2.10234
AABR07014974.1	ENSRNOG00000052298	2.09765
Cd86	ENSRNOG00000038835	2.09662
AABR07051583.1	ENSRNOG00000050066	2.08942
Coch	ENSRNOG00000005286	2.08679
AABR07027450.1	ENSRNOG00000045599	2.08664
Cfb_1	ENSRNOG00000000419	2.0782
Slc9a7	ENSRNOG00000004150	2.07352
C1qc	ENSRNOG00000012804	2.07051
Mnda	ENSRNOG00000003486	2.07038
Enpp3	ENSRNOG00000013791	2.06999
Adora2b	ENSRNOG00000002922	2.06942
C4b	ENSRNOG00000030729	2.06832
Ctsz	ENSRNOG00000050697	2.06394
Ctss	ENSRNOG00000021157	2.0625
Ndrg1	ENSRNOG00000007393	2.05708
AABR07060971.1	ENSRNOG00000054428	2.05292
AC109901.2	ENSRNOG00000059447	2.05
Rhbg	ENSRNOG00000019412	2.04773
Serinc2	ENSRNOG00000012989	2.04647
Frzb	ENSRNOG00000007765	2.04563
Pirb	ENSRNOG00000058422	2.04317
Col16a1	ENSRNOG00000031475	2.0419
Ctsd	ENSRNOG00000020206	2.04024
Mcoln2	ENSRNOG00000015089	2.03872
Mmp14	ENSRNOG00000010947	2.0374
Gpr183	ENSRNOG00000025094	2.03657
Folr1	ENSRNOG00000019902	2.03447
Eno2	ENSRNOG00000013141	2.03326
Plaur	ENSRNOG00000037931	2.02512
C3ar1	ENSRNOG00000009211	2.02391
AABR07038021.1	ENSRNOG00000056631	2.01472
Muc4	ENSRNOG00000001777	2.01216
Fndc1	ENSRNOG00000030210	2.01154
AABR07065699.1	ENSRNOG00000050102	2.00813
Pkib	ENSRNOG00000000811	2.00684
Itgb2	ENSRNOG00000001224	2.00583
Tnfsf8	ENSRNOG00000048321	2.00473
Aoc1	ENSRNOG00000008575	2.00411
Vsig1	ENSRNOG00000054219	2.00377
Ctsb	ENSRNOG00000010331	2.00311
Rab44	ENSRNOG00000001869	2.00097
RGD1305807	ENSRNOG00000010497	1.99932
Sez6l2	ENSRNOG00000027098	1.99888
C4bpb	ENSRNOG00000004125	1.99674
Cd14	ENSRNOG00000017819	1.99485
Tmc1	ENSRNOG00000051262	1.98915
Cd83	ENSRNOG00000018092	1.98821
Soat1	ENSRNOG00000004111	1.98321
AABR07065699.5	ENSRNOG00000058753	1.98299
Lilra5	ENSRNOG00000027808	1.97903
Ctsh	ENSRNOG00000014064	1.97893
Cysltr1	ENSRNOG00000037845	1.97716
Prdx5	ENSRNOG00000021125	1.97635
Emilin2	ENSRNOG00000014837	1.97171
Nipsnap3b	ENSRNOG00000010332	1.97033
AABR07065789.1	ENSRNOG00000006333	1.97016
Il1rl1	ENSRNOG00000014835	1.96844
Slc11a1	ENSRNOG00000014956	1.96526
Clec4e	ENSRNOG00000061394	1.964
Asgr2	ENSRNOG00000030726	1.96262
RGD1563231	ENSRNOG00000047571	1.95784
Rnf150	ENSRNOG00000003479	1.94849
AABR07034730.3	ENSRNOG00000057165	1.94844
Slc28a2	ENSRNOG00000028668	1.94498
Scn3b	ENSRNOG00000057221	1.94376
Sting1	ENSRNOG00000042137	1.94358
Trim36	ENSRNOG00000016612	1.94221
Bpifb1	ENSRNOG00000015468	1.94076
Clec10a	ENSRNOG00000018715	1.9396
Dusp9	ENSRNOG00000055185	1.93662
Kcnip4	ENSRNOG00000032350	1.93616
Ak4	ENSRNOG00000045738	1.93616
Hmox1	ENSRNOG00000014117	1.93502
Tmem132d	ENSRNOG00000008447	1.93355
Syp	ENSRNOG00000059720	1.93291
C5ar1	ENSRNOG00000047800	1.9294
Cxcl1	ENSRNOG00000002802	1.92813
Mcpt1	ENSRNOG00000020625	1.92594
Vsig2	ENSRNOG00000033490	1.92308
Slc16a3	ENSRNOG00000036677	1.92254
Lhfpl2	ENSRNOG00000011032	1.92078
Atp6v1b2	ENSRNOG00000011891	1.9171
Pf4	ENSRNOG00000028015	1.9164
Uchl1	ENSRNOG00000002343	1.91413
Mmp19	ENSRNOG00000006778	1.91019
Prss30	ENSRNOG00000033266	1.9064
Slc4a5	ENSRNOG00000010378	1.90575
Myo7a	ENSRNOG00000013641	1.90567
Sh2b2	ENSRNOG00000001425	1.9045
Cpb2	ENSRNOG00000010935	1.90323
Sftpd	ENSRNOG00000056001	1.90231
Trpa1	ENSRNOG00000007354	1.89978
AABR07034739.1	ENSRNOG00000050000	1.89381
Vcan	ENSRNOG00000029212	1.89076
Cfd	ENSRNOG00000033564	1.88945
Csf2rb	ENSRNOG00000000187	1.88627
Apba1	ENSRNOG00000014928	1.88376
Il1r2	ENSRNOG00000014378	1.87788
Mroh2a	ENSRNOG00000042182	1.87763
Olr1	ENSRNOG00000056219	1.87681
LOC690097	ENSRNOG00000058993	1.87666
Slc6a20	ENSRNOG00000006010	1.87505
Tnip3	ENSRNOG00000054524	1.87326
Plbd1	ENSRNOG00000008933	1.87218
Npc2	ENSRNOG00000012062	1.87216
Opn3	ENSRNOG00000003778	1.87185
AABR07061134.1	ENSRNOG00000061431	1.87116
Igf1	ENSRNOG00000004517	1.86999
Ncf1	ENSRNOG00000001480	1.86891
Cd109	ENSRNOG00000025332	1.86571
Resp18	ENSRNOG00000019704	1.8654
Dusp4	ENSRNOG00000011921	1.86449
Hk2	ENSRNOG00000006116	1.86419
Ccl3	ENSRNOG00000011205	1.86383
Tmem176a	ENSRNOG00000023708	1.86357
Plau	ENSRNOG00000010516	1.85693
Tmem176b	ENSRNOG00000008465	1.85682
LOC690813	ENSRNOG00000048070	1.84679
Scimp	ENSRNOG00000037409	1.84625
Tpbgl	ENSRNOG00000017922	1.84336
Grn	ENSRNOG00000021031	1.84255
Angptl1	ENSRNOG00000004712	1.83815
Slc7a5	ENSRNOG00000018824	1.83149
RT1-Bb	ENSRNOG00000032708	1.82871
Stom	ENSRNOG00000019147	1.82867
Clec12a	ENSRNOG00000054860	1.82766
Gpr68	ENSRNOG00000046309	1.82635
Kcnj13	ENSRNOG00000016057	1.81984
Gem	ENSRNOG00000015160	1.81969
Ebf4	ENSRNOG00000007408	1.81454
Cd300a	ENSRNOG00000057058	1.81349
RGD1562339	ENSRNOG00000001767	1.81286
Atp8a1	ENSRNOG00000034200	1.81244
LOC690045	ENSRNOG00000061895	1.81098
Cd4	ENSRNOG00000016294	1.80793
Pla2g2a	ENSRNOG00000016945	1.80791
Csf2ra	ENSRNOG00000049782	1.80317
Htr2b	ENSRNOG00000017625	1.80177
Rtn4rl2	ENSRNOG00000021513	1.8015
Shcbp1	ENSRNOG00000053026	1.79365
Qsox1	ENSRNOG00000003649	1.7912
Duoxa1	ENSRNOG00000018005	1.78584
Anln	ENSRNOG00000014343	1.78398
RT1-DMa	ENSRNOG00000047854	1.78381
Cpz	ENSRNOG00000008947	1.78243
Sh2d1b	ENSRNOG00000031599	1.7783
Emb	ENSRNOG00000060329	1.7744
AABR07051551.2	ENSRNOG00000058460	1.76652
Galc	ENSRNOG00000003759	1.7638
AC141959.1	ENSRNOG00000028545	1.76359
Tuba1c	ENSRNOG00000021438	1.75565
Gusb	ENSRNOG00000000913	1.75542
Cspg5	ENSRNOG00000020833	1.75441
Ms4a4a	ENSRNOG00000045611	1.75351
Drp2	ENSRNOG00000026704	1.75228
Ncapg	ENSRNOG00000038572	1.75002
Abo	ENSRNOG00000046958	1.74649
Ms4a6a	ENSRNOG00000020991	1.74302
Abca6	ENSRNOG00000046890	1.74151
Jchain	ENSRNOG00000003666	1.74138
AABR07060979.1	ENSRNOG00000030177	1.73986
Arg1	ENSRNOG00000013304	1.73877
Sh3pxd2b	ENSRNOG00000004063	1.73695
Fst	ENSRNOG00000011631	1.73679
Mitf	ENSRNOG00000008658	1.73209
Rasd1	ENSRNOG00000003348	1.73014
Mrc1	ENSRNOG00000018251	1.72671
Sod2	ENSRNOG00000019048	1.72499
AABR07013111.1	ENSRNOG00000030575	1.72208
Ctsa	ENSRNOG00000015857	1.72075
Wnt7b	ENSRNOG00000015750	1.72004
Aqp3	ENSRNOG00000009797	1.71556
Rab39a	ENSRNOG00000009008	1.71317
Elf3	ENSRNOG00000006330	1.71106
Dpp7	ENSRNOG00000012640	1.71048
Pram1	ENSRNOG00000039204	1.70701
Tlcd4	ENSRNOG00000025160	1.70489
Ms4a4e	ENSRNOG00000050024	1.70399
Prcp	ENSRNOG00000010630	1.70364
Cd63	ENSRNOG00000007650	1.70219
Slc41a2	ENSRNOG00000008713	1.69784
Cenpw	ENSRNOG00000042944	1.69784
Osbpl8	ENSRNOG00000026962	1.69766
Edil3	ENSRNOG00000033064	1.69675
AABR07051731.1	ENSRNOG00000053899	1.69493
Baalc	ENSRNOG00000004697	1.69236
Serpinb8	ENSRNOG00000002396	1.69154
Cd53	ENSRNOG00000017874	1.69061
Fbln7	ENSRNOG00000017550	1.68764
RT1-Ba	ENSRNOG00000000451	1.68424
Psap	ENSRNOG00000000571	1.68407
Lat2	ENSRNOG00000021856	1.68275
Brms1l_1	ENSRNOG00000008249	1.67879
Clec4a1	ENSRNOG00000042139	1.67721
F5	ENSRNOG00000057855	1.67671
Rnf128	ENSRNOG00000055721	1.67517
Trem1	ENSRNOG00000022859	1.67382
P2ry12	ENSRNOG00000013902	1.67335
Gas7	ENSRNOG00000049361	1.67273
Tlr8	ENSRNOG00000045992	1.66844
AABR07065815.2	ENSRNOG00000050143	1.66743
Ccl22	ENSRNOG00000016535	1.66648
Acp5	ENSRNOG00000046261	1.66471
RGD1565785	ENSRNOG00000003748	1.65916
Plxnc1	ENSRNOG00000007970	1.65768
Btk	ENSRNOG00000052407	1.65693
Ca13	ENSRNOG00000021323	1.65323
Fam111a	ENSRNOG00000012067	1.6531
Tmprss4	ENSRNOG00000026650	1.65221
Ect2	ENSRNOG00000024365	1.6519
RT1-Db1	ENSRNOG00000033215	1.65164
Trpv2	ENSRNOG00000003104	1.64981
Fxyd2	ENSRNOG00000016469	1.6485
Fcgr2a	ENSRNOG00000046663	1.64748
P2ry2	ENSRNOG00000019283	1.63835
AABR07039446.2	ENSRNOG00000061403	1.63734
Ugt1a6	ENSRNOG00000018740	1.63529
Cpxm1	ENSRNOG00000021220	1.63418
Unc13a	ENSRNOG00000018452	1.63366
Cd74	ENSRNOG00000018735	1.63281
Gpr137b	ENSRNOG00000002480	1.62853
LOC108348047	ENSRNOG00000049422	1.62631
5330417C22Rik	ENSRNOG00000020272	1.62419
Cenpi	ENSRNOG00000033335	1.62418
C5	ENSRNOG00000018899	1.62313
Aldh18a1	ENSRNOG00000060047	1.62258
Myom3	ENSRNOG00000032994	1.62214
Brms1l_2	ENSRNOG00000051077	1.62181
Camsap3	ENSRNOG00000000986	1.6215
Clec11a	ENSRNOG00000019138	1.61907
AABR07065886.1	ENSRNOG00000046401	1.61864
P2ry6	ENSRNOG00000019270	1.61729
Mertk	ENSRNOG00000017319	1.6162
Gpr34	ENSRNOG00000039759	1.60957
Ccnb1	ENSRNOG00000058539	1.6078
Rgs18	ENSRNOG00000003959	1.60655
Iqgap3	ENSRNOG00000027894	1.60568
Cyba	ENSRNOG00000013014	1.60395
Ttc9	ENSRNOG00000007254	1.60167
Clec4a2	ENSRNOG00000030012	1.60121
Lpl	ENSRNOG00000012181	1.59782
Atp1a1	ENSRNOG00000030019	1.59329
Slc13a2	ENSRNOG00000010337	1.59314
Ebi3	ENSRNOG00000050509	1.59267
Tmem108	ENSRNOG00000010911	1.5926
Sap30	ENSRNOG00000013218	1.59071
RT1-Da	ENSRNOG00000032844	1.59025
Stk32a	ENSRNOG00000027066	1.58783
Gaa	ENSRNOG00000047656	1.58508
Sass6	ENSRNOG00000015211	1.5849
Snx8	ENSRNOG00000001258	1.58447
Alox12	ENSRNOG00000027037	1.58314
Myo3b	ENSRNOG00000030022	1.58272
Cfh	ENSRNOG00000030715	1.57999
AABR07054319.1	ENSRNOG00000031167	1.57946
Tnfrsf9	ENSRNOG00000036942	1.5776
Gipc3	ENSRNOG00000020593	1.57177
LOC108348139	ENSRNOG00000051002	1.57001
Ubd	ENSRNOG00000000768	1.57
Fnip2	ENSRNOG00000027833	1.56405
Xk	ENSRNOG00000003749	1.56359
Cpxm2	ENSRNOG00000015902	1.56336
Ifitm1	ENSRNOG00000004273	1.56234
Emp1	ENSRNOG00000008676	1.56221
Tubb2b	ENSRNOG00000017445	1.56185
Entpd3	ENSRNOG00000018982	1.56026
Pdlim4	ENSRNOG00000050794	1.55993
Tcp11l1	ENSRNOG00000042576	1.55366
Sdf2l1	ENSRNOG00000001859	1.55049
Sftpa1	ENSRNOG00000011438	1.55012
AABR07065699.4	ENSRNOG00000058352	1.54919
Gnpda1	ENSRNOG00000047213	1.54667
Irf4	ENSRNOG00000061070	1.54457
Cp	ENSRNOG00000011913	1.54377
Bcl2a1	ENSRNOG00000047606	1.54041
Rnaset2	ENSRNOG00000013190	1.5377
Grin2c	ENSRNOG00000003280	1.53669
Pigr	ENSRNOG00000004405	1.53557
Marchf1	ENSRNOG00000026310	1.53073
RGD1304694	ENSRNOG00000031269	1.53048
Mfsd12	ENSRNOG00000039858	1.53025
Pcsk1	ENSRNOG00000011107	1.52922
C4a	ENSRNOG00000047657	1.52612
Ulbp1	ENSRNOG00000061316	1.52366
Bub1b	ENSRNOG00000007906	1.52304
Col8a1	ENSRNOG00000039668	1.52257
Milr1	ENSRNOG00000042524	1.51945
Knstrn	ENSRNOG00000009334	1.51422
S100a8	ENSRNOG00000011557	1.51216
Msc	ENSRNOG00000007540	1.50886
Foxs1	ENSRNOG00000008529	1.50811
Rhou	ENSRNOG00000053560	1.5081
Arhgap10	ENSRNOG00000013152	1.50789
Egfl6	ENSRNOG00000004275	1.50667
Gucy2g	ENSRNOG00000015724	1.50402
Galnt7	ENSRNOG00000012037	1.4956
Itgax	ENSRNOG00000036703	1.4931
RT1-DMb	ENSRNOG00000049491	1.49235
Il36b	ENSRNOG00000043323	1.48954
Ypel4	ENSRNOG00000060130	1.48942
Fn1	ENSRNOG00000014288	1.48935
Sgpl1	ENSRNOG00000000565	1.48518
Osm	ENSRNOG00000024390	1.4821
Vwa5a	ENSRNOG00000046414	1.47964
Unc93b1	ENSRNOG00000017703	1.47725
Arhgap22	ENSRNOG00000024728	1.47618
Fbp2	ENSRNOG00000017637	1.47056
Tfcp2l1	ENSRNOG00000002414	1.46915
Slc6a6	ENSRNOG00000009019	1.46624
Slc25a43	ENSRNOG00000012756	1.46297
Fhl3	ENSRNOG00000007541	1.45791
Thbs1	ENSRNOG00000045829	1.45727
Tcirg1	ENSRNOG00000017220	1.45636
Olfml2b	ENSRNOG00000003018	1.45559
Slc7a2	ENSRNOG00000011016	1.45402
Ece2	ENSRNOG00000001715	1.4511
Trim46	ENSRNOG00000055433	1.45098
AABR07063279.1	ENSRNOG00000051056	1.44822
Lrrc25	ENSRNOG00000022565	1.44677
Tnfaip2	ENSRNOG00000010165	1.44638
LOC100360087	ENSRNOG00000020843	1.44161
Cd44	ENSRNOG00000006094	1.44077
Homer1	ENSRNOG00000047014	1.43827
Slc8a1	ENSRNOG00000008479	1.43766
LOC108348048	ENSRNOG00000000195	1.43526
Cstb	ENSRNOG00000001201	1.4335
Ciita	ENSRNOG00000002659	1.43103
Flrt2	ENSRNOG00000003732	1.43028
Itgb6	ENSRNOG00000008346	1.42838
Ppargc1b	ENSRNOG00000017503	1.4268
AABR07030903.1	ENSRNOG00000049552	1.42484
Diaph3	ENSRNOG00000008986	1.42483
Fcgr1a	ENSRNOG00000021199	1.42437
Hhip	ENSRNOG00000018268	1.4234
RGD1560455	ENSRNOG00000037838	1.42122
Angptl4	ENSRNOG00000007545	1.4202
LOC103690326	ENSRNOG00000057189	1.41679
Scpep1	ENSRNOG00000002358	1.41486
Gk5	ENSRNOG00000010942	1.413
Ncaph	ENSRNOG00000012051	1.41148
Sowahc	ENSRNOG00000048831	1.40969
Slc49a3	ENSRNOG00000023937	1.40679
Akr1b8	ENSRNOG00000009734	1.40471
Cldn10	ENSRNOG00000010085	1.40352
Grk3	ENSRNOG00000059456	1.40211
Igsf8	ENSRNOG00000007604	1.39768
Kcnh1	ENSRNOG00000003841	1.39659
Fgg	ENSRNOG00000025074	1.39398
Scn3a	ENSRNOG00000005007	1.39281
Osmr	ENSRNOG00000033192	1.39225
Atp6v1a	ENSRNOG00000001992	1.3911
Itgav	ENSRNOG00000004912	1.39036
Ocstamp	ENSRNOG00000019110	1.38933
Otulinl	ENSRNOG00000012109	1.38928
Slc7a8	ENSRNOG00000014311	1.38715
Tfec	ENSRNOG00000061595	1.38529
Inava	ENSRNOG00000025948	1.38234
Oma1	ENSRNOG00000007214	1.38217
Trem3	ENSRNOG00000013748	1.38204
Ntrk2	ENSRNOG00000018839	1.38132
Hunk	ENSRNOG00000002092	1.38117
C1qtnf9	ENSRNOG00000013793	1.38078
Tmem200a	ENSRNOG00000047783	1.38026
Hexa	ENSRNOG00000010252	1.37882
Sgms2	ENSRNOG00000011284	1.37841
Lyc2	ENSRNOG00000034139	1.37604
Eef1akmt4	ENSRNOG00000029529	1.37089
Fxyd5	ENSRNOG00000021062	1.37061
Tlr9	ENSRNOG00000048161	1.3654
Ramp3	ENSRNOG00000053766	1.36416
Serpinb1a	ENSRNOG00000016581	1.36139
Gja1	ENSRNOG00000000805	1.36102
P2ry1	ENSRNOG00000014232	1.36025
Ccnf	ENSRNOG00000007483	1.35999
Timp1	ENSRNOG00000010208	1.35789
Lyz2	ENSRNOG00000005825	1.35648
Ube2c	ENSRNOG00000015131	1.35467
Met	ENSRNOG00000052745	1.35424
Tbc1d9	ENSRNOG00000003496	1.354
Npl	ENSRNOG00000002775	1.35272
Pip5k1b	ENSRNOG00000015232	1.35149
Cotl1	ENSRNOG00000016257	1.35133
Tec	ENSRNOG00000002278	1.35075
Gk	ENSRNOG00000034116	1.3487
Rbm47	ENSRNOG00000002408	1.34822
Fermt3	ENSRNOG00000021161	1.34541
Pfkfb2	ENSRNOG00000004162	1.34406
Vwa7	ENSRNOG00000000860	1.34384
Dcdc2	ENSRNOG00000017511	1.34183
Hs6st2	ENSRNOG00000030880	1.34115
Pik3r5	ENSRNOG00000023428	1.34046
Sfta2	ENSRNOG00000048987	1.33899
Mfsd11	ENSRNOG00000000247	1.33576
AABR07035776.1	ENSRNOG00000050059	1.33549
Slc31a1	ENSRNOG00000014475	1.33444
Ptx3	ENSRNOG00000012280	1.33284
Tc2n	ENSRNOG00000004754	1.33279
Pappa1	ENSRNOG00000033527	1.33269
Nog	ENSRNOG00000023683	1.33241
Pacc1	ENSRNOG00000003915	1.33155
Lamp3	ENSRNOG00000022792	1.3286
Ccr5	ENSRNOG00000049115	1.32586
Mcm10	ENSRNOG00000017981	1.32351
Tnfaip8l2	ENSRNOG00000021100	1.3224
Fam3b	ENSRNOG00000001962	1.32236
Pde4c_2	ENSRNOG00000043249	1.32174
Rab32	ENSRNOG00000014258	1.32168
Asf1b	ENSRNOG00000005115	1.32099
Arhgap11a	ENSRNOG00000008115	1.32016
Cd80	ENSRNOG00000001527	1.31881
Pnldc1	ENSRNOG00000023140	1.31872
Ccne1	ENSRNOG00000014786	1.31854
Ly49si3	ENSRNOG00000055455	1.31789
Slc17a9	ENSRNOG00000010275	1.31741
Sgk1	ENSRNOG00000011815	1.31727
Plet1	ENSRNOG00000024346	1.31541
Ftl1	ENSRNOG00000031506	1.31111
Hjurp	ENSRNOG00000022911	1.31055
Srd5a1	ENSRNOG00000017601	1.30923
Idh1	ENSRNOG00000015020	1.30769
Pld1	ENSRNOG00000028156	1.30667
Clec4d	ENSRNOG00000010181	1.30576
Melk	ENSRNOG00000013598	1.30487
Naglu	ENSRNOG00000032381	1.30453
LOC100359539	ENSRNOG00000008450	1.29915
Gadd45g	ENSRNOG00000013090	1.29799
Mgp	ENSRNOG00000005695	1.29734
Ttk	ENSRNOG00000029055	1.29718
Mt2A	ENSRNOG00000043098	1.29571
Cemip	ENSRNOG00000012442	1.29451
Vmp1	ENSRNOG00000003967	1.2935
Kif22	ENSRNOG00000020281	1.29305
Pcyox1	ENSRNOG00000016704	1.29148
Ccr1	ENSRNOG00000006715	1.29124
Dhcr7	ENSRNOG00000020776	1.29001
Aif1	ENSRNOG00000000853	1.28856
Vill	ENSRNOG00000011446	1.28769
Dsc2	ENSRNOG00000039969	1.28719
Gabrr2	ENSRNOG00000007490	1.28663
Mfsd2a	ENSRNOG00000014008	1.28638
Gla	ENSRNOG00000011513	1.28614
Rab11fip5	ENSRNOG00000056009	1.28579
Batf	ENSRNOG00000008588	1.28577
Smpd3	ENSRNOG00000000257	1.28484
Dkk2	ENSRNOG00000011360	1.28483
Atp6ap2	ENSRNOG00000003858	1.28465
Aff2	ENSRNOG00000052572	1.28179
Irf5	ENSRNOG00000007437	1.2815
Cdkn3	ENSRNOG00000009785	1.2812
P2rx4	ENSRNOG00000001300	1.28051
Ros1	ENSRNOG00000000406	1.27754
Uba1y	ENSRNOG00000052326	1.27649
AABR07060833.1	ENSRNOG00000006857	1.27607
Znf750	ENSRNOG00000046482	1.27588
Oscar	ENSRNOG00000055716	1.27441
Tent5a	ENSRNOG00000010240	1.27309
Lilrb3a	ENSRNOG00000053260	1.27259
Anpep	ENSRNOG00000014610	1.27241
Hck	ENSRNOG00000009331	1.27179
Npc1	ENSRNOG00000012016	1.27177
Scara5	ENSRNOG00000014398	1.27067
Ticam2	ENSRNOG00000042070	1.26877
Ptger2	ENSRNOG00000050968	1.26874
Metrnl	ENSRNOG00000046202	1.26615
RT1-M2	ENSRNOG00000049590	1.26559
Man2b2	ENSRNOG00000061779	1.26284
Dsg3	ENSRNOG00000016632	1.26215
Spi1	ENSRNOG00000012172	1.26205
Slc29a3	ENSRNOG00000000568	1.26036
AABR07070117.1	ENSRNOG00000059851	1.25993
Vash1	ENSRNOG00000010457	1.25601
C1s	ENSRNOG00000011971	1.25583
Adam11	ENSRNOG00000002753	1.2554
Cd180	ENSRNOG00000010266	1.25462
Slc10a6	ENSRNOG00000002057	1.25113
Bcl2l14	ENSRNOG00000028632	1.25018
Chst1	ENSRNOG00000007989	1.24922
Rgs10	ENSRNOG00000042592	1.2489
AABR07060872.1	ENSRNOG00000049829	1.24795
Syngr1	ENSRNOG00000017108	1.24783
Tmem163	ENSRNOG00000003769	1.2456
Havcr2	ENSRNOG00000031443	1.24161
C2cd4b	ENSRNOG00000009106	1.24122
Gcsam	ENSRNOG00000022110	1.23854
Slc29a2	ENSRNOG00000050201	1.23746
Rmdn2	ENSRNOG00000006082	1.23723
Atp13a3	ENSRNOG00000001724	1.23716
Scamp5	ENSRNOG00000054008	1.23705
Bmf	ENSRNOG00000007529	1.23646
Dgat2	ENSRNOG00000016573	1.23568
LOC100363469	ENSRNOG00000031579	1.23436
Racgap1	ENSRNOG00000049033	1.23104
Lbp	ENSRNOG00000014532	1.22938
Ddhd1	ENSRNOG00000009481	1.22815
RGD1565355	ENSRNOG00000040108	1.22757
Gch1	ENSRNOG00000011039	1.2226
Slc26a11	ENSRNOG00000030537	1.22202
Sfn	ENSRNOG00000033153	1.22167
Chek2	ENSRNOG00000037509	1.21991
Ehf	ENSRNOG00000007484	1.21981
Slc2a1	ENSRNOG00000007284	1.21972
Fuca1	ENSRNOG00000009325	1.21958
Ch25h	ENSRNOG00000019141	1.21857
Fh	ENSRNOG00000003653	1.21799
Cnr2	ENSRNOG00000009260	1.21786
Prrg3	ENSRNOG00000047013	1.21783
Plekhm3	ENSRNOG00000023760	1.21684
Col1a1	ENSRNOG00000003897	1.21655
Cebpa	ENSRNOG00000010918	1.21549
Cep55	ENSRNOG00000016377	1.21389
Ppt1	ENSRNOG00000012616	1.21258
Apobr	ENSRNOG00000017403	1.21174
Cxcl3	ENSRNOG00000028043	1.21143
Micall2	ENSRNOG00000022533	1.21095
Nusap1	ENSRNOG00000004921	1.21049
Apobec1	ENSRNOG00000015411	1.21003
Tmtc1	ENSRNOG00000001854	1.21001
Mlph	ENSRNOG00000019763	1.20716
Moxd1	ENSRNOG00000015321	1.20654
Crlf2	ENSRNOG00000049828	1.20635
Gns_2	ENSRNOG00000046159	1.20383
Clcn7	ENSRNOG00000016976	1.20346
Cacna2d2	ENSRNOG00000015835	1.20181
Nckap1l	ENSRNOG00000036829	1.20096
Clec7a	ENSRNOG00000054251	1.20036
Gmpr	ENSRNOG00000017250	1.19915
Atf3	ENSRNOG00000003745	1.19769
Lgals1	ENSRNOG00000009884	1.19732
Rbl1	ENSRNOG00000006921	1.19699
Malt1	ENSRNOG00000017181	1.19682
Amdhd2	ENSRNOG00000006460	1.19617
Gpx1	ENSRNOG00000048812	1.19561
Fasn	ENSRNOG00000045636	1.19488
Pim1	ENSRNOG00000000529	1.19312
Glrx	ENSRNOG00000012183	1.19298
Syk	ENSRNOG00000012160	1.1908
Tlr1	ENSRNOG00000038722	1.19063
Dnajc22	ENSRNOG00000053498	1.19009
Trim47	ENSRNOG00000008215	1.18988
Rad51	ENSRNOG00000037302	1.1894
Nupr1	ENSRNOG00000019206	1.18696
Layn	ENSRNOG00000011228	1.1862
Parvg	ENSRNOG00000052064	1.18616
Sfxn1	ENSRNOG00000018279	1.18475
Tenm3	ENSRNOG00000012802	1.18444
Glb1	ENSRNOG00000010196	1.18389
Inf2	ENSRNOG00000028650	1.18238
Fgd2	ENSRNOG00000000528	1.17996
Adgre1	ENSRNOG00000046254	1.17789
Il18	ENSRNOG00000009848	1.17728
Mcm5	ENSRNOG00000014336	1.17607
Rrm2	ENSRNOG00000054286	1.17496
Slc36a1	ENSRNOG00000012356	1.17432
Cdkn1a	ENSRNOG00000000521	1.17106
RGD1561149	ENSRNOG00000008113	1.17066
Rasa4	ENSRNOG00000001431	1.17052
Slc16a1	ENSRNOG00000019996	1.1703
Baiap2	ENSRNOG00000004049	1.16971
Lcp1	ENSRNOG00000010319	1.16719
Plcb2	ENSRNOG00000058337	1.16662
Plin2	ENSRNOG00000007060	1.16475
Gng2	ENSRNOG00000048980	1.16425
Fam3c	ENSRNOG00000060349	1.16391
Rims2	ENSRNOG00000004201	1.16297
Tubb6	ENSRNOG00000018371	1.16297
Klra2	ENSRNOG00000031515	1.16277
Ckap2	ENSRNOG00000024650	1.16192
AABR07005821.1	ENSRNOG00000020560	1.16179
Xcr1	ENSRNOG00000006620	1.15992
Top2a	ENSRNOG00000053047	1.15945
Trpc6	ENSRNOG00000006324	1.15861
Cyp2c23	ENSRNOG00000013291	1.15774
Dennd2d	ENSRNOG00000017680	1.15696
Card9	ENSRNOG00000051470	1.15627
Litaf	ENSRNOG00000002520	1.15369
Cx3cl1	ENSRNOG00000016326	1.15152
Slc39a6	ENSRNOG00000028703	1.14899
Pparg	ENSRNOG00000008839	1.1479
Rap2b	ENSRNOG00000014420	1.14538
Crym	ENSRNOG00000061215	1.14399
Gjb1	ENSRNOG00000003746	1.14174
AABR07069219.1	ENSRNOG00000024757	1.13813
Nrg1	ENSRNOG00000010392	1.13437
Renbp	ENSRNOG00000054765	1.13304
Polr1a	ENSRNOG00000009545	1.1327
Lpxn	ENSRNOG00000012611	1.13246
Pdk4	ENSRNOG00000009565	1.13157
Pla2g4a	ENSRNOG00000002657	1.13156
Yipf1	ENSRNOG00000010512	1.13131
Slc15a3	ENSRNOG00000021644	1.13108
Ctsc	ENSRNOG00000016496	1.12932
Smpdl3b	ENSRNOG00000042326	1.12925
Ly86	ENSRNOG00000000137	1.12814
Erp29	ENSRNOG00000001348	1.12719
Nnmt	ENSRNOG00000005930	1.12546
Slc7a1	ENSRNOG00000000924	1.12347
Espl1	ENSRNOG00000012835	1.12318
Ltbp2	ENSRNOG00000012094	1.12178
Pdzk1ip1	ENSRNOG00000008161	1.12027
Tmem132c	ENSRNOG00000000963	1.12013
Slc18a2	ENSRNOG00000008890	1.11982
Sidt2	ENSRNOG00000017871	1.11907
Hdac9	ENSRNOG00000004158	1.11839
Stk10	ENSRNOG00000004217	1.11531
Txnrd3	ENSRNOG00000059810	1.11277
Vav1	ENSRNOG00000050430	1.11236
Cdca3	ENSRNOG00000015529	1.10849
Lpcat2	ENSRNOG00000016643	1.10569
Acsl4	ENSRNOG00000019180	1.10532
Tmem51	ENSRNOG00000014197	1.10225
Col9a2	ENSRNOG00000011502	1.10165
Tlr6	ENSRNOG00000002161	1.10154
Sertad4	ENSRNOG00000060773	1.1009
St3gal5	ENSRNOG00000010284	1.1008
Myc	ENSRNOG00000004500	1.09846
Elf5	ENSRNOG00000008282	1.09802
A3galt2	ENSRNOG00000005935	1.09703
Kcnh4	ENSRNOG00000018790	1.09477
Laptm5	ENSRNOG00000011054	1.09442
Arsb	ENSRNOG00000011150	1.09408
Uprt	ENSRNOG00000021552	1.09382
Rnf149	ENSRNOG00000013946	1.09213
Rasd2	ENSRNOG00000014761	1.09158
Aen	ENSRNOG00000018421	1.0905
Cdk1	ENSRNOG00000000632	1.09018
Lnpk	ENSRNOG00000001593	1.08907
Rragc	ENSRNOG00000017426	1.08821
Cyth4	ENSRNOG00000007679	1.08585
Slamf7	ENSRNOG00000023209	1.08561
Gpt2	ENSRNOG00000059579	1.08559
Ank3	ENSRNOG00000053288	1.08543
Papln	ENSRNOG00000009448	1.08522
Ccna2	ENSRNOG00000015423	1.08491
Napsa	ENSRNOG00000019854	1.08413
Hmmr	ENSRNOG00000059894	1.08373
Phyhd1	ENSRNOG00000016794	1.08232
G6pd	ENSRNOG00000056728	1.08096
Frk	ENSRNOG00000000543	1.07712
Tlr2	ENSRNOG00000009822	1.07669
Plch2	ENSRNOG00000014226	1.07662
Primpol	ENSRNOG00000022320	1.07612
Kif5a	ENSRNOG00000005299	1.07597
Slc16a14	ENSRNOG00000017072	1.07566
Cenpe	ENSRNOG00000009339	1.07548
Sema3c	ENSRNOG00000006526	1.0742
Spdef	ENSRNOG00000000491	1.07175
Ankh	ENSRNOG00000010960	1.0716
Knl1	ENSRNOG00000060100	1.07082
Tnfrsf12a	ENSRNOG00000003546	1.06995
Pkp1	ENSRNOG00000010076	1.06935
Ptpro	ENSRNOG00000006231	1.06873
Tanc2	ENSRNOG00000052840	1.06786
LOC108351137_1	ENSRNOG00000018630	1.067
Lonrf3	ENSRNOG00000013092	1.06658
Tpx2	ENSRNOG00000008165	1.06647
N4bp2l1	ENSRNOG00000059322	1.06464
Cited2	ENSRNOG00000056940	1.06377
St14	ENSRNOG00000005903	1.06371
Tpp1	ENSRNOG00000019212	1.06323
Kpna3	ENSRNOG00000014945	1.06258
Chdh	ENSRNOG00000015859	1.06231
AABR07051562.1	ENSRNOG00000042083	1.06195
Kntc1	ENSRNOG00000033658	1.0612
Ripk3	ENSRNOG00000020465	1.06065
LOC100910669	ENSRNOG00000033017	1.05767
Mybpc2	ENSRNOG00000019627	1.0575
Pgap1	ENSRNOG00000013388	1.0572
Kif11	ENSRNOG00000056069	1.05703
Csf1	ENSRNOG00000018659	1.0548
Vwa1	ENSRNOG00000018338	1.05443
Pdhx	ENSRNOG00000006947	1.05436
Zfand2a	ENSRNOG00000032917	1.05329
Gpr88	ENSRNOG00000026953	1.05248
Bace2	ENSRNOG00000001953	1.05212
Dram1	ENSRNOG00000038916	1.05092
Fut4	ENSRNOG00000009157	1.05082
Comt	ENSRNOG00000001889	1.05005
Fhod3	ENSRNOG00000027230	1.04722
Snhg11	ENSRNOG00000036802	1.04713
Tlr5	ENSRNOG00000022067	1.0463
Susd3	ENSRNOG00000016525	1.04622
Plxnb2	ENSRNOG00000007133	1.04598
Evi2a	ENSRNOG00000022764	1.04531
Igfbp4	ENSRNOG00000010635	1.04395
Clcn5	ENSRNOG00000002862	1.04349
Adamts2	ENSRNOG00000061484	1.04245
Ap3s1	ENSRNOG00000003829	1.04109
Nxpe1	ENSRNOG00000027730	1.04078
Parp1	ENSRNOG00000003084	1.03965
Zbtb16	ENSRNOG00000029980	1.03924
Atp8b1	ENSRNOG00000024952	1.03744
Hspa5	ENSRNOG00000018294	1.03656
Manba	ENSRNOG00000052247	1.03654
Farsb	ENSRNOG00000014119	1.03466
Mst1	ENSRNOG00000019680	1.03344
RGD1561730	ENSRNOG00000057141	1.03306
Ncf4	ENSRNOG00000006940	1.03268
Lgals3bp	ENSRNOG00000003217	1.03083
LOC100911881	ENSRNOG00000050181	1.03082
Trpm6	ENSRNOG00000013053	1.02876
Pcnx2	ENSRNOG00000028580	1.02842
Tnfsf13	ENSRNOG00000014171	1.02754
Slc38a7	ENSRNOG00000012007	1.02662
Sema6b	ENSRNOG00000045998	1.02629
Stx18	ENSRNOG00000006139	1.02441
Stac2	ENSRNOG00000004805	1.0238
LOC100911660	ENSRNOG00000047692	1.02348
Tlr7	ENSRNOG00000004249	1.02277
Mki67	ENSRNOG00000028137	1.02086
Bhlhe40	ENSRNOG00000007152	1.02078
Atp6v0c	ENSRNOG00000006542	1.01933
Selplg	ENSRNOG00000000699	1.01904
Enpp2	ENSRNOG00000004089	1.01843
Slc1a5	ENSRNOG00000015948	1.01836
Tgfb1	ENSRNOG00000020652	1.0181
Apobec3	ENSRNOG00000016852	1.01775
Nt5e	ENSRNOG00000011071	1.01772
Wdfy4	ENSRNOG00000029662	1.01771
Fkbp5	ENSRNOG00000022523	1.01726
Slc25a13	ENSRNOG00000009957	1.01571
LOC498368	ENSRNOG00000002191	1.01523
Sema4a	ENSRNOG00000019737	1.01276
Abca1	ENSRNOG00000018126	1.01225
Rnls	ENSRNOG00000020705	1.01148
Zc3h12a	ENSRNOG00000009131	1.01102
Cog5	ENSRNOG00000056610	1.01088
Cdh2	ENSRNOG00000015602	1.01073
Slc2a6	ENSRNOG00000005900	1.00984
Sgo2	ENSRNOG00000027035	1.00977
Wdr91	ENSRNOG00000010421	1.00821
Lamp2	ENSRNOG00000000164	1.00811
Slc25a10	ENSRNOG00000036693	1.00737
Gna15	ENSRNOG00000005378	1.00563
Mfsd1	ENSRNOG00000013790	1.0038
Phgdh	ENSRNOG00000019328	1.00377
Sftpc	ENSRNOG00000011177	1.00332
Adgrg1	ENSRNOG00000014963	1.00298
Qpct	ENSRNOG00000005705	1.00264
P4hb	ENSRNOG00000036689	1.001
Cadm3	ENSRNOG00000003365	1.00061
Nipal1	ENSRNOG00000025882	-1.00009
Lrrc23	ENSRNOG00000047890	-1.00044
Klhdc1	ENSRNOG00000004425	-1.00144
Pim2	ENSRNOG00000008177	-1.00218
Sptbn1	ENSRNOG00000005434	-1.00235
Inpp1	ENSRNOG00000012375	-1.00345
Actg2	ENSRNOG00000029401	-1.00432
Ppp1r9a	ENSRNOG00000008869	-1.00437
Exoc3l2	ENSRNOG00000017448	-1.00576
Sox13	ENSRNOG00000028353	-1.006
Cfap300	ENSRNOG00000043410	-1.00648
Arl4d	ENSRNOG00000020770	-1.00733
Eps8l2	ENSRNOG00000018336	-1.00878
Fam110d	ENSRNOG00000016491	-1.00882
AABR07056633.1	ENSRNOG00000024494	-1.009
Hmgcs2	ENSRNOG00000019120	-1.00978
Nr3c2	ENSRNOG00000034007	-1.01009
Cxcl14	ENSRNOG00000011984	-1.01104
Tmc8	ENSRNOG00000046086	-1.0117
Fermt2	ENSRNOG00000009102	-1.01197
Ptpn14	ENSRNOG00000003407	-1.01235
Aldh1a1	ENSRNOG00000017619	-1.0138
Ropn1l	ENSRNOG00000042781	-1.01383
Gna14	ENSRNOG00000014840	-1.01428
Dnm3	ENSRNOG00000026490	-1.01433
Atp2a3	ENSRNOG00000017912	-1.0145
Mboat2	ENSRNOG00000061050	-1.0156
Pitpnm3	ENSRNOG00000008323	-1.0158
Hap1	ENSRNOG00000014819	-1.01593
Irak1bp1	ENSRNOG00000008984	-1.01618
Sox7	ENSRNOG00000012049	-1.01731
Wdr63	ENSRNOG00000014893	-1.01805
Cdhr3	ENSRNOG00000047455	-1.01825
Lrrc51	ENSRNOG00000020124	-1.01864
Olfm1	ENSRNOG00000009862	-1.01925
Gdap1	ENSRNOG00000005850	-1.02027
Clcf1	ENSRNOG00000018752	-1.02104
Smad9	ENSRNOG00000000091	-1.02144
Tmem47	ENSRNOG00000030418	-1.02154
Ttc21a	ENSRNOG00000034089	-1.0221
Nr4a1	ENSRNOG00000007607	-1.02223
Aff3	ENSRNOG00000018830	-1.02345
Flrt3	ENSRNOG00000004874	-1.02486
Mmrn2	ENSRNOG00000051977	-1.02591
Pola2	ENSRNOG00000020906	-1.02622
Thbd	ENSRNOG00000004687	-1.02772
Ctnnal1	ENSRNOG00000010593	-1.02825
Ttc23	ENSRNOG00000013877	-1.02837
Map2	ENSRNOG00000011841	-1.0287
Clec1a	ENSRNOG00000060460	-1.03015
Cfap70	ENSRNOG00000007046	-1.03037
Wnt4	ENSRNOG00000013166	-1.03041
Podxl	ENSRNOG00000012495	-1.03048
Cox4i2	ENSRNOG00000007827	-1.0307
Npw	ENSRNOG00000012390	-1.03128
Il4r	ENSRNOG00000015441	-1.03447
Heg1	ENSRNOG00000001793	-1.03603
Rgs22	ENSRNOG00000025551	-1.03618
Cd247	ENSRNOG00000003298	-1.03639
Fam174b	ENSRNOG00000012369	-1.03649
Lag3	ENSRNOG00000021334	-1.03709
Mprip	ENSRNOG00000003226	-1.03868
Mns1	ENSRNOG00000057867	-1.03896
Shank2	ENSRNOG00000050206	-1.04114
B4galt2	ENSRNOG00000019609	-1.04166
Map4k2	ENSRNOG00000021061	-1.04347
Tp53i11	ENSRNOG00000008738	-1.04377
Togaram2	ENSRNOG00000026344	-1.04424
LOC100912585	ENSRNOG00000047907	-1.0445
Pgm2l1	ENSRNOG00000017079	-1.04468
Casz1	ENSRNOG00000013474	-1.04514
Tspoap1	ENSRNOG00000007957	-1.04554
Akap6	ENSRNOG00000004841	-1.04575
AABR07027872.1	ENSRNOG00000055197	-1.04631
Ephb4	ENSRNOG00000045952	-1.04789
Nudt4	ENSRNOG00000009094	-1.0483
Fam234b	ENSRNOG00000008443	-1.04844
Tbxa2r	ENSRNOG00000020585	-1.04914
Flt1	ENSRNOG00000000940	-1.0508
Tmem53	ENSRNOG00000019186	-1.05193
AABR07007068.1	ENSRNOG00000017438	-1.05296
Pcdh7	ENSRNOG00000012367	-1.05324
Grk5	ENSRNOG00000011439	-1.05345
Adgrf5	ENSRNOG00000011154	-1.05369
Inpp5a	ENSRNOG00000017635	-1.0545
Mfng	ENSRNOG00000008133	-1.05466
P2rx6	ENSRNOG00000001873	-1.05521
Tekt1	ENSRNOG00000014973	-1.05631
Prx	ENSRNOG00000018369	-1.05632
Kcnk5	ENSRNOG00000047005	-1.05688
Mpped2	ENSRNOG00000004863	-1.05731
Kank2	ENSRNOG00000010643	-1.05824
Gimap4	ENSRNOG00000008369	-1.05836
Dnah6	ENSRNOG00000015581	-1.05866
Map2k6	ENSRNOG00000004437	-1.05927
Col13a1	ENSRNOG00000000552	-1.05949
Fmo3	ENSRNOG00000003620	-1.05955
Rsph4a	ENSRNOG00000049696	-1.05997
Sema3a	ENSRNOG00000023337	-1.06005
Rgs3	ENSRNOG00000024501	-1.06034
Rnf144a	ENSRNOG00000007370	-1.06125
Acap1	ENSRNOG00000015674	-1.06173
Speg	ENSRNOG00000019850	-1.06211
Prickle2	ENSRNOG00000012364	-1.06273
Apol3	ENSRNOG00000042771	-1.06318
Arid3b	ENSRNOG00000019677	-1.06684
Cyp2d4	ENSRNOG00000032261	-1.06704
Cyp21a1	ENSRNOG00000000428	-1.06707
Evc	ENSRNOG00000007564	-1.06781
Ndrg2	ENSRNOG00000010389	-1.06809
Myh11	ENSRNOG00000057880	-1.06828
Ccdc180	ENSRNOG00000010412	-1.06852
Cfap45	ENSRNOG00000008492	-1.06909
Pramef8	ENSRNOG00000027278	-1.0694
Mak	ENSRNOG00000015101	-1.07072
Gata3	ENSRNOG00000019336	-1.07205
Kank3	ENSRNOG00000007230	-1.07317
Igf2	ENSRNOG00000020369	-1.07388
Cdh5	ENSRNOG00000013324	-1.07398
Eno4	ENSRNOG00000018310	-1.07421
Ehd1	ENSRNOG00000043503	-1.07444
Ak9	ENSRNOG00000037688	-1.07459
Cyth3	ENSRNOG00000001065	-1.07505
RGD1561648	ENSRNOG00000023824	-1.07546
Clec18a	ENSRNOG00000022721	-1.07632
Ttc25	ENSRNOG00000017473	-1.07645
Nck2	ENSRNOG00000017155	-1.07645
Nipal2	ENSRNOG00000005190	-1.07686
Adgrl3	ENSRNOG00000030149	-1.07698
Tns2	ENSRNOG00000010588	-1.078
Dtx1	ENSRNOG00000050848	-1.07869
Dact3	ENSRNOG00000052256	-1.07957
Rfx2	ENSRNOG00000045846	-1.08116
Rbp4	ENSRNOG00000015518	-1.08125
LOC680885	ENSRNOG00000039749	-1.08255
Ldb2	ENSRNOG00000003205	-1.08266
Abi3bp	ENSRNOG00000001627	-1.08283
Ankef1	ENSRNOG00000005792	-1.08314
Ccl21	ENSRNOG00000034290	-1.08334
Cfap161	ENSRNOG00000012301	-1.0839
Ppp1r13b	ENSRNOG00000012653	-1.08446
Sstr4	ENSRNOG00000004641	-1.08451
Itprip_2	ENSRNOG00000046036	-1.08483
Mzf1	ENSRNOG00000027550	-1.08491
Hoxb3	ENSRNOG00000008313	-1.08505
Card10	ENSRNOG00000008401	-1.08533
Calcrl	ENSRNOG00000054695	-1.0854
Art4	ENSRNOG00000005670	-1.08561
Pir	ENSRNOG00000003674	-1.08615
Als2cl	ENSRNOG00000033921	-1.08669
Prickle4	ENSRNOG00000014180	-1.08701
Lgi1	ENSRNOG00000014758	-1.08821
Nkg7	ENSRNOG00000017749	-1.0884
Prex2	ENSRNOG00000005391	-1.0884
Enkur	ENSRNOG00000018631	-1.09023
Cdkn1c	ENSRNOG00000059500	-1.09161
Adrb1	ENSRNOG00000017002	-1.09203
Sod3	ENSRNOG00000003869	-1.09211
Mpdz	ENSRNOG00000007894	-1.09476
Spef1	ENSRNOG00000021247	-1.09518
Cfap69	ENSRNOG00000006114	-1.09561
Insrr	ENSRNOG00000057702	-1.09683
Dnah5	ENSRNOG00000048363	-1.09696
Nxn	ENSRNOG00000008178	-1.09717
Ncald	ENSRNOG00000042978	-1.09724
Hsf4	ENSRNOG00000015253	-1.09845
Bambi	ENSRNOG00000016066	-1.09881
Ndufa4l2	ENSRNOG00000031851	-1.09897
Syde1	ENSRNOG00000007307	-1.10028
Zeb1	ENSRNOG00000017863	-1.10061
Cyp27a1	ENSRNOG00000017188	-1.10092
Slco3a1	ENSRNOG00000032798	-1.10171
Dynlrb2	ENSRNOG00000012450	-1.10208
Syt5	ENSRNOG00000018217	-1.10247
Dusp14	ENSRNOG00000030091	-1.10458
Dnah7	ENSRNOG00000060984	-1.10462
Camk2n1	ENSRNOG00000016322	-1.10508
Spaca9	ENSRNOG00000012697	-1.10621
Hspa12b	ENSRNOG00000021244	-1.10697
Trpc3	ENSRNOG00000016070	-1.10779
Efnb1	ENSRNOG00000006877	-1.10995
Myh7b	ENSRNOG00000018997	-1.11019
Gnai1	ENSRNOG00000057096	-1.11022
Ak7	ENSRNOG00000055714	-1.111
Dnah12	ENSRNOG00000059865	-1.11111
Lifr	ENSRNOG00000011696	-1.11181
Kcnb1	ENSRNOG00000046949	-1.11191
Wdr66	ENSRNOG00000001342	-1.11198
Spag17	ENSRNOG00000037196	-1.11201
Dnah2	ENSRNOG00000052688	-1.11226
Ttll10	ENSRNOG00000020132	-1.11237
Phf19	ENSRNOG00000018874	-1.11294
Rsph10b	ENSRNOG00000001036	-1.11319
Myrip	ENSRNOG00000018797	-1.11362
Gucy1a1	ENSRNOG00000012302	-1.11367
Tmem204	ENSRNOG00000016494	-1.11373
Stxbp6	ENSRNOG00000004198	-1.11389
Arhgef18	ENSRNOG00000028090	-1.11402
Rps6kl1	ENSRNOG00000005530	-1.11467
Srgap1	ENSRNOG00000004603	-1.1149
Cobl	ENSRNOG00000004281	-1.1155
Arhgap33	ENSRNOG00000024677	-1.11742
Kif19	ENSRNOG00000003105	-1.11806
Crmp1	ENSRNOG00000004781	-1.11918
Notch4	ENSRNOG00000000442	-1.11927
Arap2	ENSRNOG00000056826	-1.11982
Vsnl1	ENSRNOG00000005345	-1.12035
Ntn1	ENSRNOG00000003947	-1.12038
Ptpn22	ENSRNOG00000019614	-1.12121
Dapk2	ENSRNOG00000017332	-1.12188
Anxa8	ENSRNOG00000060949	-1.12223
Ccdc65	ENSRNOG00000058916	-1.12236
Lrrc1	ENSRNOG00000005970	-1.12325
Pdgfa	ENSRNOG00000001312	-1.12492
Gas2l2	ENSRNOG00000047546	-1.12565
Caps2	ENSRNOG00000026600	-1.12584
Mpp2	ENSRNOG00000059683	-1.12588
Tbx2	ENSRNOG00000003517	-1.12675
Coro2b	ENSRNOG00000015257	-1.12778
Zfp608	ENSRNOG00000023197	-1.128
Cdr2	ENSRNOG00000017260	-1.12813
Jcad	ENSRNOG00000027938	-1.12869
Rflnb	ENSRNOG00000006674	-1.12876
Adgrl4	ENSRNOG00000033940	-1.12906
Sox2	ENSRNOG00000012199	-1.12977
Kcnq5	ENSRNOG00000013781	-1.13036
Ryr3	ENSRNOG00000006645	-1.13255
Klf2	ENSRNOG00000014205	-1.13299
Nrbp2	ENSRNOG00000029535	-1.13383
Grin3b	ENSRNOG00000012562	-1.13465
Nova2	ENSRNOG00000013847	-1.13529
Ccnjl	ENSRNOG00000003893	-1.13601
Gpr4	ENSRNOG00000016362	-1.13633
Pappa2	ENSRNOG00000042860	-1.13721
Spata18	ENSRNOG00000002120	-1.13772
Kif27	ENSRNOG00000019257	-1.13821
Stard9	ENSRNOG00000010050	-1.13834
Eml6	ENSRNOG00000037462	-1.14032
Cdc42ep1	ENSRNOG00000008517	-1.14092
Amotl2	ENSRNOG00000008487	-1.14125
Btbd8	ENSRNOG00000023446	-1.14222
Ttll3	ENSRNOG00000009032	-1.14416
Trim30c	ENSRNOG00000031202	-1.14516
Sh3bp4	ENSRNOG00000019316	-1.14614
Snrk	ENSRNOG00000004050	-1.14624
T2	ENSRNOG00000024172	-1.14736
Mcf2l	ENSRNOG00000028426	-1.14802
Ank2	ENSRNOG00000011076	-1.1483
Bmpr2	ENSRNOG00000022196	-1.14922
Usp2	ENSRNOG00000006663	-1.14931
Rimbp2	ENSRNOG00000022893	-1.14974
Rflna	ENSRNOG00000001011	-1.1507
Icam2	ENSRNOG00000025143	-1.15106
RGD1564149	ENSRNOG00000012714	-1.1513
Pde3a	ENSRNOG00000025042	-1.15205
Trim72	ENSRNOG00000022099	-1.15277
Erg	ENSRNOG00000001652	-1.15297
Meis1	ENSRNOG00000004606	-1.15297
Cdh23	ENSRNOG00000033087	-1.15307
Artn	ENSRNOG00000019842	-1.15341
Calhm6	ENSRNOG00000037757	-1.15359
Nr2f1	ENSRNOG00000014795	-1.15411
Akap2	ENSRNOG00000011504	-1.15428
Schip1	ENSRNOG00000009276	-1.15445
Snta1	ENSRNOG00000016062	-1.15465
Zfp474	ENSRNOG00000018724	-1.15542
Sgip1	ENSRNOG00000006357	-1.15564
Eml1	ENSRNOG00000043143	-1.15597
Cttnbp2	ENSRNOG00000061845	-1.15671
Zfp423	ENSRNOG00000014658	-1.15671
Fam124a	ENSRNOG00000009802	-1.15773
Gpr157	ENSRNOG00000017528	-1.15784
Gng8	ENSRNOG00000016701	-1.15803
Scd	ENSRNOG00000013552	-1.15979
Matn2	ENSRNOG00000006060	-1.16063
Efemp1	ENSRNOG00000003553	-1.16107
LOC360479	ENSRNOG00000028075	-1.16119
Alpk3	ENSRNOG00000011659	-1.16276
Nlrc3	ENSRNOG00000024210	-1.16314
Fads3	ENSRNOG00000020385	-1.16395
Arhgef26	ENSRNOG00000014549	-1.16496
Antxr1	ENSRNOG00000008678	-1.16574
Tspan12	ENSRNOG00000059016	-1.16598
Prkce	ENSRNOG00000015603	-1.16602
Tox2	ENSRNOG00000008146	-1.16648
Cd7	ENSRNOG00000036674	-1.16732
Exph5	ENSRNOG00000025115	-1.16903
Il17d	ENSRNOG00000051120	-1.16933
Zfp13	ENSRNOG00000003455	-1.17183
Septin4	ENSRNOG00000007367	-1.17254
Dusp8	ENSRNOG00000029394	-1.17405
Igfbp5	ENSRNOG00000017206	-1.17417
Sox12	ENSRNOG00000007514	-1.17475
Adarb1	ENSRNOG00000001227	-1.17487
Ablim3	ENSRNOG00000019365	-1.17521
Rassf9	ENSRNOG00000038574	-1.17537
Rasgef1a	ENSRNOG00000031671	-1.1781
Dnah11	ENSRNOG00000005451	-1.17828
Ecscr	ENSRNOG00000039593	-1.17931
Slc9a3r2	ENSRNOG00000002997	-1.18052
Cdc25b	ENSRNOG00000021248	-1.1811
Lrrc34	ENSRNOG00000027935	-1.18139
Tbc1d10c	ENSRNOG00000021510	-1.18191
Adcy5	ENSRNOG00000002229	-1.18272
Tp73	ENSRNOG00000024707	-1.18337
Cd226	ENSRNOG00000038197	-1.18368
Fras1	ENSRNOG00000002053	-1.18494
RGD1359634	ENSRNOG00000011170	-1.18701
Ldlrad1	ENSRNOG00000037795	-1.18709
Hspb7	ENSRNOG00000029079	-1.18719
Lzts3	ENSRNOG00000021231	-1.18894
Lrrc4	ENSRNOG00000008098	-1.19031
Gimap5	ENSRNOG00000008416	-1.19045
Acod1	ENSRNOG00000009919	-1.19076
Col4a4	ENSRNOG00000014851	-1.19179
Fbln2	ENSRNOG00000007338	-1.19209
Mlf1	ENSRNOG00000012827	-1.19211
Tspan8	ENSRNOG00000004411	-1.19235
Zfp365	ENSRNOG00000000638	-1.19325
Agbl3	ENSRNOG00000010397	-1.19372
Sox5	ENSRNOG00000027869	-1.19379
Ubxn11	ENSRNOG00000015476	-1.19529
Slc28a3	ENSRNOG00000018853	-1.19676
Fank1	ENSRNOG00000018327	-1.19782
Gpihbp1	ENSRNOG00000007475	-1.19794
Mapk12	ENSRNOG00000031233	-1.19937
Zmynd10	ENSRNOG00000021602	-1.19979
LOC103693323	ENSRNOG00000003349	-1.2007
Akr7a3	ENSRNOG00000017899	-1.20083
Ankrd29	ENSRNOG00000046744	-1.20092
RGD1565033	ENSRNOG00000043295	-1.20409
Lrrc56	ENSRNOG00000016697	-1.20545
Dhtkd1	ENSRNOG00000023587	-1.20664
Ppp1r3c	ENSRNOG00000018494	-1.209
Trim13	ENSRNOG00000009075	-1.20917
Pgap4	ENSRNOG00000006800	-1.20983
Tsnaxip1	ENSRNOG00000018954	-1.21027
Ccl5	ENSRNOG00000010906	-1.21096
Thra	ENSRNOG00000009066	-1.21113
Pcdha13	ENSRNOG00000020119	-1.21184
Ccdc187	ENSRNOG00000027392	-1.21483
Col27a1	ENSRNOG00000007657	-1.21517
Ccdc113	ENSRNOG00000051510	-1.21589
Hspb6	ENSRNOG00000020922	-1.2176
Thsd1	ENSRNOG00000012108	-1.2179
LOC100912481	ENSRNOG00000046950	-1.22083
Cntn1	ENSRNOG00000004438	-1.22154
Maats1	ENSRNOG00000002976	-1.22369
Nkain4	ENSRNOG00000031834	-1.2257
LOC502684	ENSRNOG00000023721	-1.22693
Col4a3	ENSRNOG00000015365	-1.22823
Prkcg	ENSRNOG00000054371	-1.22855
Adra1a	ENSRNOG00000009522	-1.22891
Rp1	ENSRNOG00000008807	-1.22927
Gzmm	ENSRNOG00000030530	-1.2295
Rtn2	ENSRNOG00000016603	-1.22996
Usp13	ENSRNOG00000030639	-1.23088
Spef2	ENSRNOG00000058275	-1.23111
Fam81a	ENSRNOG00000057501	-1.2313
Pof1b	ENSRNOG00000004795	-1.23266
Vegfd	ENSRNOG00000003587	-1.23283
Srcin1	ENSRNOG00000011475	-1.23285
Lck	ENSRNOG00000009705	-1.23295
Lrrc32	ENSRNOG00000015310	-1.23338
Ccm2l	ENSRNOG00000009191	-1.23357
LOC100909849	ENSRNOG00000059244	-1.23398
Sit1	ENSRNOG00000021546	-1.23439
Clic5	ENSRNOG00000047218	-1.23506
Mlc1	ENSRNOG00000032871	-1.23542
Fam155b	ENSRNOG00000038066	-1.2356
Zc2hc1c	ENSRNOG00000027115	-1.23594
Rftn2	ENSRNOG00000015594	-1.23707
F11	ENSRNOG00000013684	-1.23784
Gimap7	ENSRNOG00000038740	-1.23884
Mapk15	ENSRNOG00000009336	-1.23955
Cyp26b1	ENSRNOG00000015076	-1.24114
Phex	ENSRNOG00000023440	-1.24188
Rtp3	ENSRNOG00000037167	-1.24222
Ptp4a3	ENSRNOG00000007628	-1.24298
Gimap8	ENSRNOG00000020169	-1.24322
Sema6a	ENSRNOG00000004033	-1.24323
Gstm7	ENSRNOG00000018937	-1.2435
LOC499240	ENSRNOG00000013713	-1.24422
Arap3	ENSRNOG00000055527	-1.24426
Fndc7	ENSRNOG00000020421	-1.24577
Crim1	ENSRNOG00000004208	-1.24677
Samd12	ENSRNOG00000043390	-1.24734
Fcho1	ENSRNOG00000033912	-1.24774
Ccdc114	ENSRNOG00000021109	-1.24957
Iqub	ENSRNOG00000021729	-1.25018
LOC500227	ENSRNOG00000009917	-1.2509
Arhgef10	ENSRNOG00000012561	-1.25132
Gulp1	ENSRNOG00000003242	-1.25242
Myocd	ENSRNOG00000003669	-1.25263
Pifo	ENSRNOG00000016842	-1.25328
Igfbp3	ENSRNOG00000061910	-1.25369
Lrriq1	ENSRNOG00000004564	-1.25405
Plekhh2	ENSRNOG00000005124	-1.25646
Cd6	ENSRNOG00000020884	-1.25772
Fzd8	ENSRNOG00000061031	-1.25871
Tnfrsf14	ENSRNOG00000013820	-1.2596
Cabcoco1	ENSRNOG00000000634	-1.25978
Septin1	ENSRNOG00000017804	-1.25999
Efhc2	ENSRNOG00000002986	-1.26049
Akap12	ENSRNOG00000019549	-1.26065
Fam92b	ENSRNOG00000021714	-1.26155
Tnik	ENSRNOG00000012422	-1.26229
Dusp26	ENSRNOG00000011518	-1.26249
Bmp6	ENSRNOG00000013717	-1.26389
S1pr1	ENSRNOG00000013683	-1.26458
Hydin	ENSRNOG00000017178	-1.2651
Prss12	ENSRNOG00000015353	-1.26618
Bach2	ENSRNOG00000006170	-1.26634
Plxna4	ENSRNOG00000013072	-1.26744
Vipr2	ENSRNOG00000004317	-1.26788
Prdm6	ENSRNOG00000030486	-1.26847
Cbx7	ENSRNOG00000016875	-1.26888
Alox15	ENSRNOG00000019183	-1.26916
Foxc1	ENSRNOG00000017800	-1.26973
Ect2l	ENSRNOG00000055142	-1.27053
Osbpl5	ENSRNOG00000020713	-1.27057
Pde2a	ENSRNOG00000019560	-1.27154
Dclk2	ENSRNOG00000016550	-1.27282
Fam13a	ENSRNOG00000007947	-1.27354
Pygm	ENSRNOG00000021090	-1.27428
Il33	ENSRNOG00000016456	-1.27499
Micb	ENSRNOG00000057645	-1.27573
Kndc1	ENSRNOG00000027240	-1.27686
C1qtnf2	ENSRNOG00000003870	-1.27688
Tspan13	ENSRNOG00000005046	-1.27698
Shh	ENSRNOG00000006120	-1.27755
RGD1561916	ENSRNOG00000013320	-1.27766
RT1-N3	ENSRNOG00000000795	-1.27897
Plcb4	ENSRNOG00000033119	-1.28129
AABR07027870.1	ENSRNOG00000059510	-1.28193
Ms4a4c	ENSRNOG00000020997	-1.2826
Epas1	ENSRNOG00000021318	-1.28371
Cavin1	ENSRNOG00000019778	-1.28399
Galnt15	ENSRNOG00000019718	-1.28442
Gnal	ENSRNOG00000010440	-1.28598
Gbp5	ENSRNOG00000032240	-1.28604
Slc38a5	ENSRNOG00000027767	-1.28816
Cfap52	ENSRNOG00000037718	-1.2889
Plac8	ENSRNOG00000002217	-1.28966
Gpc2	ENSRNOG00000001367	-1.28978
Epb41l4b	ENSRNOG00000056550	-1.291
Fam227a	ENSRNOG00000021795	-1.29259
Ankrd1	ENSRNOG00000018598	-1.29356
Cfap206	ENSRNOG00000009061	-1.29383
Sptb	ENSRNOG00000006911	-1.29387
Tekt4	ENSRNOG00000018792	-1.29395
Kcnj5	ENSRNOG00000033796	-1.2943
Slc4a1	ENSRNOG00000020951	-1.29589
Lims2	ENSRNOG00000016021	-1.29747
Klf4	ENSRNOG00000016299	-1.29973
Limch1	ENSRNOG00000002318	-1.30163
Far2	ENSRNOG00000001851	-1.30226
LOC103692166	ENSRNOG00000060514	-1.3061
Armcx6	ENSRNOG00000037707	-1.30631
Kit	ENSRNOG00000002227	-1.30655
Vwa3a	ENSRNOG00000025110	-1.30751
Rsph1	ENSRNOG00000057862	-1.30757
Ccdc24	ENSRNOG00000019586	-1.30806
Cnn1	ENSRNOG00000027736	-1.30825
AABR07051450.1	ENSRNOG00000049056	-1.30839
Plpp3	ENSRNOG00000008116	-1.30951
Rai2	ENSRNOG00000006670	-1.30976
Kcnk3	ENSRNOG00000009790	-1.31014
Dnai1	ENSRNOG00000013734	-1.31059
Dcn	ENSRNOG00000004554	-1.31203
LOC103694873	ENSRNOG00000028386	-1.31451
Perp	ENSRNOG00000011994	-1.31598
Ogn	ENSRNOG00000047786	-1.31708
Pgm5	ENSRNOG00000015406	-1.3171
Lrrc71	ENSRNOG00000014937	-1.31717
Ppp1r32	ENSRNOG00000020620	-1.31777
Palmd	ENSRNOG00000058609	-1.31822
Ccdc85a	ENSRNOG00000003374	-1.3191
Irs3	ENSRNOG00000001389	-1.32064
Meis2	ENSRNOG00000004730	-1.32233
Fxyd1	ENSRNOG00000021079	-1.32272
Pcdh12	ENSRNOG00000019265	-1.32506
Slc25a33	ENSRNOG00000016949	-1.32568
Npr3	ENSRNOG00000019184	-1.32656
Cacna1d	ENSRNOG00000013147	-1.32728
Ccdc78	ENSRNOG00000022331	-1.32819
Tal1	ENSRNOG00000025051	-1.32865
Tubb4a	ENSRNOG00000047505	-1.32866
Kcp	ENSRNOG00000021855	-1.33036
Bcl11b	ENSRNOG00000005776	-1.33078
Glb1l2	ENSRNOG00000007561	-1.33235
Rbm24	ENSRNOG00000046547	-1.33255
Dlc1	ENSRNOG00000010780	-1.33287
Tcte1	ENSRNOG00000019961	-1.33438
Ldb3	ENSRNOG00000059166	-1.33544
Gpr182	ENSRNOG00000004311	-1.33556
Slco1a2	ENSRNOG00000031249	-1.3378
Tmem255a	ENSRNOG00000028085	-1.33792
NEWGENE_1308171	ENSRNOG00000029792	-1.33814
Tdrp	ENSRNOG00000027245	-1.33885
Msantd1	ENSRNOG00000010867	-1.33928
Ptprcap	ENSRNOG00000021724	-1.33938
Asb2	ENSRNOG00000051619	-1.34079
S1pr4	ENSRNOG00000005370	-1.34092
RGD1306233	ENSRNOG00000010152	-1.34188
Skap1	ENSRNOG00000023881	-1.34333
Fam13c	ENSRNOG00000000275	-1.34337
Gzmbl2	ENSRNOG00000049976	-1.34454
Eng	ENSRNOG00000050190	-1.34495
Akap14	ENSRNOG00000006899	-1.3463
Atp2c2	ENSRNOG00000049334	-1.34817
Dll1	ENSRNOG00000059984	-1.34988
Sbspon	ENSRNOG00000007258	-1.35075
Hipk4	ENSRNOG00000020835	-1.35097
Anxa3	ENSRNOG00000002045	-1.35106
Sult5a1	ENSRNOG00000015695	-1.3526
LOC108348320	ENSRNOG00000006281	-1.35327
Cd8a	ENSRNOG00000007178	-1.35336
Jam2	ENSRNOG00000042848	-1.35406
Mettl7a	ENSRNOG00000001376	-1.35408
LOC102554658	ENSRNOG00000037668	-1.35437
Slc2a10	ENSRNOG00000025384	-1.35465
S1pr3	ENSRNOG00000014524	-1.35621
Sema3b	ENSRNOG00000016512	-1.35661
Arhgap29	ENSRNOG00000012563	-1.35741
Lrguk	ENSRNOG00000008775	-1.35749
Rapgef4	ENSRNOG00000001516	-1.35756
Osbpl6	ENSRNOG00000010812	-1.35898
Nostrin	ENSRNOG00000006611	-1.35969
Stpg1	ENSRNOG00000031448	-1.36
Il15	ENSRNOG00000003439	-1.36085
Fbxo36	ENSRNOG00000017053	-1.36174
Fbxl13	ENSRNOG00000043035	-1.3629
Auts2	ENSRNOG00000000885	-1.36371
Chit1	ENSRNOG00000028072	-1.36512
Tmem212	ENSRNOG00000012608	-1.36586
Rgs12	ENSRNOG00000030568	-1.36607
Ak8	ENSRNOG00000012761	-1.36675
Dnaaf1	ENSRNOG00000015590	-1.36716
Gimap6	ENSRNOG00000033338	-1.36941
Rfx8	ENSRNOG00000058243	-1.36979
AABR07024637.1	ENSRNOG00000029131	-1.37028
Runx1t1	ENSRNOG00000005673	-1.37042
Batf2	ENSRNOG00000021018	-1.37151
Trib2	ENSRNOG00000004110	-1.37425
Riiad1	ENSRNOG00000037310	-1.3744
Ppp1r16b	ENSRNOG00000015614	-1.37522
Cd3d	ENSRNOG00000015994	-1.37526
Tll1	ENSRNOG00000033528	-1.37628
Camk4	ENSRNOG00000020478	-1.37653
Lmcd1	ENSRNOG00000005690	-1.37693
Cfap126	ENSRNOG00000034221	-1.37768
Cyp2f4	ENSRNOG00000032805	-1.37786
Tspan7	ENSRNOG00000003229	-1.37963
Drc1	ENSRNOG00000024905	-1.38019
Nrgn	ENSRNOG00000010688	-1.38309
Tex26	ENSRNOG00000000905	-1.38338
Cd3e	ENSRNOG00000016069	-1.38637
Slc34a3	ENSRNOG00000010451	-1.38663
Nbl1	ENSRNOG00000049402	-1.38732
Serpina1	ENSRNOG00000032669	-1.38799
Dlg3	ENSRNOG00000002767	-1.39144
Ctsw	ENSRNOG00000027096	-1.39299
Wnt7a	ENSRNOG00000048782	-1.39331
AABR07053509.2	ENSRNOG00000059260	-1.39344
S1pr5	ENSRNOG00000020901	-1.39492
Rasgrp2	ENSRNOG00000021098	-1.39518
Pcp4l1	ENSRNOG00000003209	-1.39571
LOC102554838	ENSRNOG00000031595	-1.39785
Ifitm10	ENSRNOG00000020164	-1.39964
Egf	ENSRNOG00000053979	-1.39985
RT1-CE1	ENSRNOG00000050183	-1.40011
Cfap65	ENSRNOG00000056996	-1.40089
Shank3	ENSRNOG00000052296	-1.40254
Akap5	ENSRNOG00000006410	-1.40425
Gzmbl3	ENSRNOG00000046301	-1.4053
Chadl	ENSRNOG00000024631	-1.40552
Niban3	ENSRNOG00000039357	-1.4087
Rasip1	ENSRNOG00000021004	-1.41302
Cyp2b1	ENSRNOG00000033680	-1.41361
Cldn5	ENSRNOG00000045811	-1.41482
Tgfbr3	ENSRNOG00000002093	-1.41591
Jhy	ENSRNOG00000008138	-1.41655
Zap70	ENSRNOG00000016995	-1.41716
Lrp3	ENSRNOG00000011451	-1.4182
Prob1	ENSRNOG00000039596	-1.41974
Scml4	ENSRNOG00000026110	-1.4201
Nexn	ENSRNOG00000012512	-1.42176
Hey1	ENSRNOG00000011593	-1.42574
Dmrta2	ENSRNOG00000008105	-1.42656
Galnt18	ENSRNOG00000017021	-1.42675
Ttc29	ENSRNOG00000012342	-1.42691
LOC103690116	ENSRNOG00000039560	-1.42768
Ccdc153	ENSRNOG00000039086	-1.42785
Rab36	ENSRNOG00000001311	-1.43166
Dnah9	ENSRNOG00000004171	-1.43277
Kcne3	ENSRNOG00000017054	-1.43527
Wnk2	ENSRNOG00000016684	-1.43635
Fam183a	ENSRNOG00000002873	-1.44202
LOC100911622	ENSRNOG00000046361	-1.44269
Sncg	ENSRNOG00000058006	-1.44287
Gsn	ENSRNOG00000018991	-1.44297
Fam171a1	ENSRNOG00000016534	-1.44386
Sphkap	ENSRNOG00000016388	-1.44603
Mycbpap	ENSRNOG00000042912	-1.44704
Pdzd2	ENSRNOG00000013140	-1.44792
Nmnat2	ENSRNOG00000027697	-1.4489
Grem2	ENSRNOG00000003616	-1.44974
Adamts17	ENSRNOG00000037080	-1.45088
Vegfa	ENSRNOG00000019598	-1.45135
Prf1	ENSRNOG00000000562	-1.45571
Trank1	ENSRNOG00000021091	-1.45637
Spire2	ENSRNOG00000016920	-1.45732
Bcl6b	ENSRNOG00000059956	-1.45946
Adgrl1	ENSRNOG00000029134	-1.45973
RGD1561795	ENSRNOG00000009203	-1.46271
Gpr161	ENSRNOG00000003073	-1.46509
Gzmk	ENSRNOG00000010661	-1.46551
Carns1	ENSRNOG00000018603	-1.4673
St6galnac3	ENSRNOG00000056894	-1.46731
Cav2	ENSRNOG00000057713	-1.46971
Slitrk6	ENSRNOG00000022337	-1.47096
Rxrg	ENSRNOG00000004537	-1.47371
Trat1	ENSRNOG00000029564	-1.47491
Ttll2	ENSRNOG00000033901	-1.47591
Ttc34	ENSRNOG00000024526	-1.47645
Hspb2	ENSRNOG00000010402	-1.47653
Pde9a	ENSRNOG00000001174	-1.47692
Grtp1	ENSRNOG00000061995	-1.4775
Gimap1	ENSRNOG00000042229	-1.47769
Masp1	ENSRNOG00000001827	-1.48128
Plag1	ENSRNOG00000008846	-1.48225
Slc16a12	ENSRNOG00000021916	-1.48282
Neto2	ENSRNOG00000016245	-1.48617
Acer2	ENSRNOG00000007637	-1.48736
Ubxn10	ENSRNOG00000027731	-1.48748
Cacnb2	ENSRNOG00000018378	-1.48792
Cavin2	ENSRNOG00000025895	-1.48895
Gata2	ENSRNOG00000012347	-1.491
Syt1	ENSRNOG00000006426	-1.49144
Grin2d	ENSRNOG00000021063	-1.49235
Exoc3l1	ENSRNOG00000015641	-1.49532
P2rx1	ENSRNOG00000017606	-1.49615
Garem2	ENSRNOG00000048004	-1.49638
Satb1	ENSRNOG00000012942	-1.49736
Calml4	ENSRNOG00000038202	-1.50007
Plce1	ENSRNOG00000014276	-1.50104
RGD1565611	ENSRNOG00000025287	-1.50157
Aloxe3	ENSRNOG00000007454	-1.50198
Lrrc10b	ENSRNOG00000030180	-1.50503
Cd5	ENSRNOG00000020872	-1.50571
Acsm5	ENSRNOG00000031211	-1.50593
Ttll9	ENSRNOG00000008596	-1.50654
Adamts5	ENSRNOG00000057794	-1.51117
Nrxn2	ENSRNOG00000021103	-1.51157
Cyyr1	ENSRNOG00000001544	-1.51196
Lepr	ENSRNOG00000023664	-1.51236
Cd96	ENSRNOG00000023030	-1.51563
LOC100911562	ENSRNOG00000046779	-1.51873
Rprml	ENSRNOG00000028436	-1.51902
Cdkl4	ENSRNOG00000040266	-1.52151
Plpp4	ENSRNOG00000020424	-1.52216
Ceacam1	ENSRNOG00000020578	-1.52235
Epb41l4a	ENSRNOG00000026050	-1.52425
Abcc6	ENSRNOG00000028781	-1.52515
Sncaip	ENSRNOG00000018254	-1.52692
Myom1	ENSRNOG00000057701	-1.52766
Mylk3	ENSRNOG00000017546	-1.5281
Ccdc8	ENSRNOG00000027936	-1.5285
Metrn	ENSRNOG00000019692	-1.52887
Lrrn1	ENSRNOG00000006802	-1.52908
Ptprb	ENSRNOG00000055293	-1.53122
Fgfr4	ENSRNOG00000016763	-1.53221
AABR07005597.1	ENSRNOG00000050426	-1.53275
Cdc42ep2	ENSRNOG00000020904	-1.53367
Sox18	ENSRNOG00000016248	-1.53563
Ly49s5	ENSRNOG00000051661	-1.53628
LOC108348276	ENSRNOG00000048118	-1.53678
Cox7a1	ENSRNOG00000050015	-1.53691
Dclk3	ENSRNOG00000033026	-1.53774
Sec14l4	ENSRNOG00000004555	-1.54228
AC109737.1	ENSRNOG00000014312	-1.54307
Cryab	ENSRNOG00000010524	-1.54319
Otud7a	ENSRNOG00000015503	-1.54336
Gfra2	ENSRNOG00000014010	-1.54456
Cdkl5	ENSRNOG00000003742	-1.54963
Myct1	ENSRNOG00000018858	-1.5503
Tril	ENSRNOG00000026941	-1.55088
Slc6a4	ENSRNOG00000003476	-1.55216
Plac9	ENSRNOG00000011263	-1.5537
Ttll6	ENSRNOG00000004939	-1.55416
Gpr158	ENSRNOG00000024832	-1.55548
Ptgfr	ENSRNOG00000046468	-1.55551
Kcnip2	ENSRNOG00000018018	-1.55674
Slc4a11	ENSRNOG00000021234	-1.55706
Gata4	ENSRNOG00000010708	-1.55765
Corin	ENSRNOG00000002302	-1.5586
Pygo1	ENSRNOG00000051813	-1.55978
Trpm5	ENSRNOG00000020484	-1.56028
Tmcc2	ENSRNOG00000000033	-1.5614
Efhd1	ENSRNOG00000015596	-1.56273
Pgam2	ENSRNOG00000013532	-1.56346
Ace	ENSRNOG00000062101	-1.5645
Lrrc18	ENSRNOG00000020080	-1.57022
Lrriq4	ENSRNOG00000009004	-1.57069
Acvrl1	ENSRNOG00000028713	-1.57204
AABR07005983.1	ENSRNOG00000005953	-1.57213
AABR07030901.1	ENSRNOG00000055889	-1.57224
Kcnj12	ENSRNOG00000002303	-1.57303
Pde8b	ENSRNOG00000010280	-1.57471
Fgfbp1	ENSRNOG00000003095	-1.57876
Ramp2	ENSRNOG00000020415	-1.57921
Kdr	ENSRNOG00000046829	-1.58128
Egfl7	ENSRNOG00000019388	-1.58268
Gimap9	ENSRNOG00000024569	-1.58303
Kcnh2	ENSRNOG00000009872	-1.58477
Cped1	ENSRNOG00000021840	-1.58575
Bicdl1	ENSRNOG00000056955	-1.58898
Gabra1	ENSRNOG00000003512	-1.58951
Ydjc	ENSRNOG00000001861	-1.58951
Cyp46a1	ENSRNOG00000007147	-1.59068
Hs3st3b1	ENSRNOG00000003384	-1.59125
Dmpk	ENSRNOG00000015085	-1.59225
Ushbp1	ENSRNOG00000023485	-1.59465
Scube2	ENSRNOG00000013123	-1.59492
Slc25a29	ENSRNOG00000004351	-1.59597
Tnfrsf25	ENSRNOG00000021814	-1.59601
Ccdc60	ENSRNOG00000032684	-1.59811
Bcl7a	ENSRNOG00000056017	-1.60036
Aatk	ENSRNOG00000004392	-1.60127
Wscd1	ENSRNOG00000007869	-1.60164
LOC103691744_1	ENSRNOG00000010658	-1.60187
Xpnpep2	ENSRNOG00000004009	-1.60235
Wfdc1	ENSRNOG00000015904	-1.60241
Dcdc5	ENSRNOG00000022178	-1.60277
Kcnh6	ENSRNOG00000008078	-1.60432
Wdr38	ENSRNOG00000014102	-1.60626
Gzma	ENSRNOG00000010603	-1.60645
Raver2	ENSRNOG00000023812	-1.60713
Cfap100	ENSRNOG00000017959	-1.60795
Ddo	ENSRNOG00000000582	-1.60979
Prdm8	ENSRNOG00000002004	-1.60982
Grasp	ENSRNOG00000007346	-1.61138
AC103535.1	ENSRNOG00000053840	-1.61148
Hoxa4	ENSRNOG00000027365	-1.61501
Sntn	ENSRNOG00000027383	-1.61548
Begain	ENSRNOG00000004650	-1.61722
AABR07027306.1	ENSRNOG00000014264	-1.62002
Arhgef15	ENSRNOG00000004566	-1.62186
Ptprr	ENSRNOG00000004483	-1.6264
Cd3g	ENSRNOG00000015945	-1.62806
Ctxn1	ENSRNOG00000001057	-1.63557
Tppp	ENSRNOG00000028261	-1.6358
Ca4	ENSRNOG00000002916	-1.63799
Apln	ENSRNOG00000003984	-1.6389
Gpm6a	ENSRNOG00000010731	-1.63929
Gria1	ENSRNOG00000045816	-1.64251
Xkrx	ENSRNOG00000054136	-1.64368
Misp3	ENSRNOG00000005619	-1.64407
Sox17	ENSRNOG00000027357	-1.64646
Tmem151b	ENSRNOG00000019958	-1.64834
Apobec4	ENSRNOG00000028089	-1.64889
Myoz1	ENSRNOG00000040122	-1.64894
Lrat	ENSRNOG00000025608	-1.64982
Efcc1	ENSRNOG00000009787	-1.65075
Ppp1r14a	ENSRNOG00000020676	-1.65264
Btbd16	ENSRNOG00000036675	-1.65298
Rgs7	ENSRNOG00000021984	-1.65329
Tcf7	ENSRNOG00000005872	-1.65369
AABR07017902.1	ENSRNOG00000009074	-1.65527
Grap	ENSRNOG00000002599	-1.65948
She	ENSRNOG00000020797	-1.66146
Slco1a4	ENSRNOG00000047493	-1.66187
Klrd1	ENSRNOG00000060246	-1.66197
Rcor2l1	ENSRNOG00000021183	-1.66279
Aplnr	ENSRNOG00000009227	-1.66425
Krt76	ENSRNOG00000031785	-1.66619
Epha8	ENSRNOG00000013036	-1.66745
RT1-T24-4	ENSRNOG00000042905	-1.67074
Cdc42bpg	ENSRNOG00000027456	-1.67359
Syt17	ENSRNOG00000017136	-1.67444
Kcnj3	ENSRNOG00000005369	-1.67489
Cd79b	ENSRNOG00000011917	-1.67627
Tbx18	ENSRNOG00000010685	-1.67793
Spock2	ENSRNOG00000061544	-1.67928
Hpgd	ENSRNOG00000010610	-1.68081
Slc13a4	ENSRNOG00000011184	-1.68178
Cacnb4	ENSRNOG00000007666	-1.68188
Stox1	ENSRNOG00000023712	-1.68206
Fam107a	ENSRNOG00000033261	-1.68355
Adh7	ENSRNOG00000032959	-1.68533
Ribc2	ENSRNOG00000033502	-1.68826
Selenbp1	ENSRNOG00000047158	-1.68982
Ttpa	ENSRNOG00000007139	-1.69455
Akr1c19	ENSRNOG00000038319	-1.69622
Lekr1	ENSRNOG00000031247	-1.69652
Spib	ENSRNOG00000019660	-1.69691
RGD1306782	ENSRNOG00000005572	-1.70092
Ripply3	ENSRNOG00000001684	-1.70118
Zdhhc2	ENSRNOG00000022686	-1.70198
Ncs1	ENSRNOG00000008761	-1.70424
Fbp1	ENSRNOG00000017597	-1.70454
Gsta4	ENSRNOG00000030449	-1.70563
Lmo3	ENSRNOG00000047450	-1.70573
LOC100910790	ENSRNOG00000006033	-1.70591
Tesc	ENSRNOG00000001128	-1.7094
Tox3	ENSRNOG00000028649	-1.7106
Lpar3	ENSRNOG00000015260	-1.71273
Slc25a34	ENSRNOG00000021526	-1.71392
Il12rb1	ENSRNOG00000019216	-1.71602
Chrdl1	ENSRNOG00000004330	-1.72107
Magi2	ENSRNOG00000013962	-1.72319
Sh3tc2	ENSRNOG00000019305	-1.72543
Fgf18	ENSRNOG00000048389	-1.72841
Klhl31	ENSRNOG00000006224	-1.73159
Rtkn2	ENSRNOG00000000636	-1.73371
Sdr9c7	ENSRNOG00000004459	-1.73683
Kank4	ENSRNOG00000007779	-1.73713
Pde1b	ENSRNOG00000036828	-1.73811
Slc29a1	ENSRNOG00000019752	-1.73901
LOC103689922_1	ENSRNOG00000047951	-1.74312
Dnali1	ENSRNOG00000024957	-1.74339
Aoc3	ENSRNOG00000051307	-1.74477
Rarb	ENSRNOG00000024061	-1.74901
Baiap3	ENSRNOG00000017893	-1.74916
Aox1	ENSRNOG00000015354	-1.75589
Cd40lg	ENSRNOG00000000871	-1.76326
Galnt16	ENSRNOG00000004589	-1.76493
Hoxa2	ENSRNOG00000005968	-1.76522
Plagl1	ENSRNOG00000025587	-1.76553
AABR07071765.1	ENSRNOG00000047457	-1.76634
Cav1	ENSRNOG00000056836	-1.77074
Arhgap20	ENSRNOG00000025624	-1.77118
Tmem121b	ENSRNOG00000046851	-1.77257
Ptpru	ENSRNOG00000013515	-1.77335
Synm	ENSRNOG00000014030	-1.77372
Cdh4	ENSRNOG00000052405	-1.77822
Enho	ENSRNOG00000043300	-1.78
Pcdhga1	ENSRNOG00000039463	-1.78105
Kcnk2	ENSRNOG00000002653	-1.78142
Kcnmb4	ENSRNOG00000054458	-1.78203
Itk	ENSRNOG00000006860	-1.78361
Spsb4	ENSRNOG00000012862	-1.78376
Amigo2	ENSRNOG00000007032	-1.79111
Ccdc68	ENSRNOG00000021381	-1.79807
Chd5	ENSRNOG00000011268	-1.7986
Sema3g	ENSRNOG00000018952	-1.80692
Tek	ENSRNOG00000008587	-1.80728
Spns2	ENSRNOG00000057040	-1.81004
Susd2	ENSRNOG00000033389	-1.81549
Sh3rf2	ENSRNOG00000018780	-1.81834
Cytl1	ENSRNOG00000028108	-1.81986
Faslg	ENSRNOG00000002978	-1.82316
Sec14l5	ENSRNOG00000002917	-1.82588
Frmpd4	ENSRNOG00000004118	-1.8265
[truncated: 216 more rows]
