# Supplementary material for: Time-Course of Transcriptomic Change in the Lungs of F344 Rats Repeatedly Exposed to a Multiwalled Carbon Nanotube in a 2-Year Test
Source: Nanomaterials (Basel). 2023 Jul 19;13(14):2105. doi: 10.3390/nano13142105 (PMC10383707; doi:10.3390/nano13142105)
Supplement: Supplementary file 1 [file nanomaterials-13-02105-s001.zip › Table S4 All significant canonical pathways.xlsx]

## Sheet: Table S4a Pathways (Y-0.5)
Table S4. All significantly perturbed canonical pathways at each time point
Table S4a. All significantly perturbed canonical pathways at Year 0.5
Ingenuity Canonical Pathways	-log(p-value)	z-score	Ratio	Molecules
Phagosome Formation	13.6	5.20847	0.114	ACKR4,ADGRV1,ADORA1,ADORA2B,Adora3/LOC100911796,ADRA1A,ADRA2A,ADRA2B,AGTR2,APLNR,C3,C3AR1,C5AR1,CARD9,CCR5,CCR8,CD14,CLEC4D,CLEC4E,CNR2,CYSLTR1,FCGR1A,FCGR2A,FCGR2B,GALR3,GCGR,GPR183,GPR34,GPR65,GPR68,GPR84,HCK,HMOX1,IGHE,ITGAX,ITGB2,ITGB8,LBP,LPAR3,MALT1,MARCO,MC2R,MC5R,MRC1,MSR1,MYH6,MYH7,MYL2,MYL4,MYL7,MYLK2,MYLK3,P2RY13,P2RY2,P2RY6,PIK3R5,PIP5K1B,PLA2G1B,PLA2G4E,PLA2G7,PLD3,PRLHR,PROKR1,PTAFR…
Agranulocyte Adhesion and Diapedesis	13.1		0.182	ACKR4,ACTA1,ACTC1,ACTG2,AOC3,C5AR1,CCL1,CCL17,Ccl2,CCL2,CCL22,CCL3L3,CCL4,Ccl7,Ccl9,CCR5,CCR8,CLDN10,CLDN4,CLDN6,CLDN8,CXCL10,CXCL11,CXCL2,CXCL3,CXCL6,IL18,IL1RN,ITGB2,MMP12,MMP14,MMP19,MMP7,MYH6,MYH7,MYL2,MYL4,MYL7,PF4
Complement System	11.9	0.57735	0.432	C1QA,C1QB,C1QC,C2,C3,C3AR1,C4A/C4B,C4BPA,C4BPB,C5AR1,C6,CFB,CFI,ITGAX,ITGB2,SERPING1
Kinetochore Metaphase Signaling Pathway	11.5	3.12772	0.234	BIRC5,BUB1,BUB1B,CCNB1,CDC20,CDCA8,CDK1,CENPA,CENPE,CENPU,DNALI1,DSN1,ESPL1,KIF2C,KNL1,KNTC1,MASTL,NDC80,NUF2,PLK1,PPP1R14A,PPP1R3A,PPP1R3C,PTTG1,SKA1,TTK
Granulocyte Adhesion and Diapedesis	9.36		0.164	ACKR4,C5AR1,CCL1,CCL17,Ccl2,CCL2,CCL22,CCL3L3,CCL4,Ccl7,Ccl9,CCR5,CCR8,CLDN10,CLDN4,CLDN6,CLDN8,CXCL10,CXCL11,CXCL2,CXCL3,CXCL6,IL18,IL1R2,IL1RN,ITGB2,MMP12,MMP14,MMP19,MMP7,PF4
Breast Cancer Regulation by Stathmin1	8.72	2.4327	0.103	ACKR4,ADGRV1,ADORA1,ADORA2B,Adora3/LOC100911796,ADRA1A,ADRA2A,ADRA2B,AGTR2,APLNR,ARHGEF15,AURKA,C3AR1,C5AR1,CAMK2A,CCR5,CCR8,CDK1,CNR2,CYSLTR1,E2F3,E2F7,E2F8,EGF,GALR3,GCGR,GPR183,GPR34,GPR65,GPR68,GPR84,IGF1,LPAR3,MC2R,MC5R,P2RY13,P2RY2,P2RY6,PIK3R5,PLCB2,PPP1R14A,PPP1R3A,PPP1R3C,PRKAR1B,PRLHR,PROKR1,PTAFR,PTGER2,PTGFR,RASD1,RASD2,S1PR3,SCTR,SPDEF,SSTR1,SSTR4,TUBA1C,TUBB1,TUBB2B,TUBB4A,XCR1
Acute Phase Response Signaling	8.34	3.5	0.157	A2M,C1QA,C1QB,C1QC,C2,C3,C4A/C4B,C4BPA,C4BPB,CFB,CP,FTL,HMOX1,HP,HPX,IL18,IL1RN,IL6,ITIH4,LBP,OSM,RASD1,RASD2,SERPINA1,SERPINA3,SERPINE1,SERPINF2,SERPING1,SOD2
TREM1 Signaling	8.17	4.24264	0.234	CCL2,CD83,CD86,CIITA,CXCL3,FCGR2B,IL18,IL6,ITGAX,LAT2,NLRP6,TLR1,Tlr11,Tlr12,TLR5,TLR8,TREM1,TYROBP
G-Protein Coupled Receptor Signaling	7.45	2.10859	0.0925	ACKR4,ADCY1,ADGRV1,ADORA1,ADORA2B,Adora3/LOC100911796,ADRA1A,ADRA2A,ADRA2B,AGTR2,APLNR,C3AR1,C5AR1,CAMK2A,CCR5,CCR8,CNR2,CYSLTR1,DUSP4,DUSP9,ENPP6,GALR3,GCGR,GNA15,GNAO1,GNAT2,GPR183,GPR34,GPR65,GPR68,GPR84,HCN4,KCNN4,LPAR3,MC2R,MC5R,MYL2,MYL4,MYL7,MYLK2,MYLK3,P2RY13,P2RY2,P2RY6,PDE2A,PDE9A,PIK3R5,PLCB2,PRKAR1B,PRLHR,PROKR1,PTAFR,PTGER2,PTGFR,RASD1,RASD2,RGS10,RGS18,RGS7,S1PR3,SCTR,SMPDL3A,SSTR1,…
CREB Signaling in Neurons	6.5	3.15929	0.0924	ACKR4,ADCY1,ADGRV1,ADORA1,ADORA2B,Adora3/LOC100911796,ADRA1A,ADRA2A,ADRA2B,AGTR2,APLNR,C3AR1,C5AR1,CAMK2A,CCR5,CCR8,CNR2,CYSLTR1,EGF,FGFR4,GALR3,GCGR,GNA15,GNAO1,GNAT2,GPR183,GPR34,GPR65,GPR68,GPR84,GRIN2C,IGF1,KDR,LPAR3,MC2R,MC5R,P2RY13,P2RY2,P2RY6,PIK3R5,PLCB2,PRKAR1B,PRLHR,PROKR1,PTAFR,PTGER2,PTGFR,RASD1,RASD2,S1PR3,SCTR,SSTR1,SSTR4,TGFBR1,TNFRSF11A,XCR1
Neuroinflammation Signaling Pathway	6.43	3.05329	0.114	BIRC5,CCL2,CD200R1,CD80,CD86,CXCL10,CYBB,GABRR2,GJB1,GRIN2C,GRIN3A,HLA-DQA1,HLA-DQB1,HLA-DRA,HLA-DRB5,HMOX1,IL18,IL6,KCNJ5,LOC100909593/RT1-DMa,LOC100909630/RT1-DMb,MAPT,NCF1,PIK3R5,PLA2G1B,PLA2G4E,S100B,SLC6A12,SOD2,TGFBR1,TLR1,Tlr11,Tlr12,TLR5,TLR8,TYROBP
Th1 and Th2 Activation Pathway	6.06		0.14	CCR5,CCR8,CD4,CD80,CD86,DLL4,HAVCR2,HLA-DQA1,HLA-DQB1,HLA-DRA,HLA-DRB5,ICOS,IL18,IL24,IL6,ITGB2,LOC100909593/RT1-DMa,LOC100909630/RT1-DMb,PIK3R5,SPI1,TBX21,TGFBR1,TNFRSF4,VAV1
Th1 Pathway	5.65	3	0.156	CCR5,CD4,CD80,CD86,DLL4,HAVCR2,HLA-DQA1,HLA-DQB1,HLA-DRA,HLA-DRB5,ICOS,IL18,IL6,ITGB2,LOC100909593/RT1-DMa,LOC100909630/RT1-DMb,PIK3R5,TBX21,VAV1
B Cell Development	5.54		0.25	CD19,CD79B,CD80,CD86,DNTT,HLA-DQA1,HLA-DQB1,HLA-DRA,HLA-DRB5,LOC100909593/RT1-DMa,LOC100909630/RT1-DMb
Th2 Pathway	5.46	1.73205	0.146	CCR5,CCR8,CD4,CD80,CD86,HLA-DQA1,HLA-DQB1,HLA-DRA,HLA-DRB5,ICOS,IL24,ITGB2,LOC100909593/RT1-DMa,LOC100909630/RT1-DMb,PIK3R5,SPI1,TBX21,TGFBR1,TNFRSF4,VAV1
Actin Cytoskeleton Signaling	5.2	-0.242536	0.114	ACTA1,ACTC1,ACTG2,ACTN2,CD14,DIAPH3,EGF,GSN,IQGAP3,ITGAX,ITGB2,ITGB8,LBP,MATK,MYH6,MYH7,MYL2,MYL4,MYL7,MYLK2,MYLK3,NCKAP1L,PIK3R5,PIP5K1B,RASD1,RASD2,TIAM1,VAV1
Hepatic Fibrosis / Hepatic Stellate Cell Activation	5.13		0.124	A2M,CCL2,CCR5,CD14,COL13A1,COL16A1,Col6a4,CXCL3,CYP2E1,EGF,IGF1,IGF2,IGFBP3,IL1R2,IL6,KDR,LBP,MYH6,MYH7,MYL2,MYL4,MYL7,SERPINE1,TGFBR1
cAMP-mediated signaling	5.08	-0.57735	0.115	ADCY1,ADORA1,ADORA2B,ADRA2A,ADRA2B,AGTR2,APLNR,CAMK2A,CNR2,DUSP4,DUSP9,ENPP6,GNAO1,MC2R,MC5R,P2RY13,PDE2A,PDE9A,PKIB,PRKAR1B,PTGER2,RGS10,RGS18,RGS7,S1PR3,SMPDL3A,XCR1
Estrogen-mediated S-phase Entry	4.9	2.12132	0.308	CCNA2,CCNE1,CDK1,E2F3,E2F7,E2F8,ESR1,RBL1
Gαi Signaling	4.76	0.83205	0.136	ADCY1,ADORA1,ADRA2A,ADRA2B,AGTR2,APLNR,CAV1,CNR2,GNA15,GNAO1,GNAT2,P2RY13,PRKAR1B,RASD1,RASD2,RGS10,RGS7,S1PR3,XCR1
Coagulation System	4.74	-0.333333	0.257	A2M,F11,F13A1,F3,PLAU,PLAUR,SERPINA1,SERPINE1,SERPINF2
Phagosome Maturation	4.48		0.126	ATP6V0D2,ATP6V1B2,CTSA,CTSB,CTSD,CTSH,CTSK,CTSS,CTSZ,CYBB,HLA-DRA,HLA-DRB5,LPO,NCF1,PRDX5,RAB7B,TUBA1C,TUBB1,TUBB2B,TUBB4A
LXR/RXR Activation	4.42	-0.774597	0.138	APOE,C3,C4A/C4B,CCL2,CD14,FASN,HPX,IL18,IL1R2,IL1RN,IL6,ITIH4,LBP,LYZ,MSR1,SERPINA1,SERPINF2
CLEAR Signaling Pathway	4.4	0.185695	0.102	ATP6V0D2,ATP6V1B2,CD63,CTSA,CTSB,CTSD,EGF,FGFR4,GAA,GUSB,HEXA,IFI30,IGF1,KCNIP3,KDR,MITF,PPARGC1A,PSAP,RASD1,RASD2,SFN,SLC36A1,TGFBR1,TLR1,Tlr11,Tlr12,TLR5,TLR8,TNFRSF11A
Crosstalk between Dendritic Cells and Natural Killer Cells	4.26	1.89737	0.154	ACTA1,ACTC1,ACTG2,CAMK2A,CD80,CD83,CD86,CSF2RB,HLA-DRA,HLA-DRB5,IL18,IL6,TNFSF10,TYROBP
Tumor Microenvironment Pathway	4.22	3.7097	0.117	ARG1,CCL2,CD44,CTLA4,EGF,IGF1,IGF2,IL6,MMP12,MMP14,MMP19,MMP7,OSM,PIK3R5,PLAU,RASD1,RASD2,SLC16A1,SLC2A1,SPP1,TIAM1
Leukocyte Extravasation Signaling	4.2	2.18282	0.114	ACTA1,ACTC1,ACTG2,ACTN2,BTK,CD44,CLDN10,CLDN4,CLDN6,CLDN8,CYBA,CYBB,EDIL3,ITGB2,MMP12,MMP14,MMP19,MMP7,NCF1,NCF4,PIK3R5,VAV1
Atherosclerosis Signaling	4.07		0.13	ALOX15,ALOXE3,APOE,CCL2,F3,IL18,IL1RN,IL6,ITGB2,LYZ,MSR1,PLA2G1B,PLA2G4E,PLA2G7,SERPINA1,TNFRSF12A,TPSAB1/TPSB2
Dilated Cardiomyopathy Signaling Pathway	3.91	2.5	0.122	ACTA1,ACTC1,ACTG2,ADCY1,CAMK2A,CNN1,DSC2,MYBPC3,MYH6,MYH7,MYL2,MYL4,MYL7,PDE2A,PRKAR1B,TNNC1,TNNI3,TNNT2
Sertoli Cell-Sertoli Cell Junction Signaling	3.79		0.107	A2M,ACTA1,ACTC1,ACTG2,ACTN2,CLDN10,CLDN4,CLDN6,CLDN8,ITGAX,ITGB2,ITGB8,MAGI2,MYO7A,PRKAR1B,RASD1,RASD2,SPTB,TUBA1C,TUBB1,TUBB2B,TUBB4A
FXR/RXR Activation	3.76		0.127	APOE,C3,C4A/C4B,FASN,FBP1,FETUB,FGFR4,FOXA3,HPX,IL18,IL1RN,ITIH4,NR5A2,PPARGC1A,SERPINA1,SERPINF2
Iron homeostasis signaling pathway	3.75		0.122	ALAS2,ATP6V0D2,ATP6V1B2,BMP15,BMP3,CP,EGF,FTL,Hba-a1/Hba-a2,HBB,HJV,HMOX1,HP,HPX,IL6,SLC11A1,STEAP3
HIF1α Signaling	3.73	2.55841	0.106	CAMK2A,CYBB,EGF,FOXP3,HK2,HK3,HMOX1,IGF1,IGF2,IL6,KDR,MMP12,MMP14,MMP19,MMP7,NCF1,PIK3R5,RASD1,RASD2,SERPINE1,SLC2A1,SLC2A5
MSP-RON Signaling Pathway	3.62		0.172	ACTA1,ACTC1,ACTG2,CCL2,CSF2RB,F11,ITGB2,KLK13,KLK6,PIK3R5
Role of Pattern Recognition Receptors in Recognition of Bacteria and Viruses	3.62	3.16228	0.115	C1QA,C1QB,C1QC,C3,C3AR1,C5AR1,IL18,IL6,OSM,PIK3R5,PTX3,TLR1,Tlr11,TLR5,TLR8,TNFSF10,TNFSF13,Tnfsf9
Colorectal Cancer Metastasis Signaling	3.6	2.9824	0.0959	ADCY1,BIRC5,EGF,GNA15,GNAO1,GNAT2,IL6,MMP12,MMP14,MMP19,MMP7,PIK3R5,PRKAR1B,PTGER2,RASD1,RASD2,Rhou,Tcf7,TGFBR1,TLR1,Tlr11,Tlr12,TLR5,TLR8,WNT10A,WNT7B
ID1 Signaling Pathway	3.54	-0.218218	0.105	AURKA,BHLHA15,BHLHE40,Bhlhe41,BIRC5,CAV1,CCNE1,CDC20,CHRNA4,EGF,FGFR4,HCK,IGF2,IL6,KIF11,PIK3R5,RASD1,RASD2,S100A9,SMAD9,TGFBR1
MSP-RON Signaling In Macrophages Pathway	3.52	-0.774597	0.126	ARG1,CIITA,F11,HLA-DQA1,HLA-DQB1,HLA-DRA,HLA-DRB5,ITGB2,KLK13,KLK6,LOC100909593/RT1-DMa,LOC100909630/RT1-DMb,PIK3R5,RASD1,RASD2
SPINK1 Pancreatic Cancer Pathway	3.49	-1.89737	0.167	CPA3,CPA4,CPB2,CPE,CTSA,CTSB,KLK13,KLK6,MMP12,TGFBR1
Pathogenesis of Multiple Sclerosis	3.37		0.444	CCL4,CCR5,CXCL10,CXCL11
Mitotic Roles of Polo-Like Kinase	3.15	1.41421	0.152	CCNB1,CDC20,CDK1,ESPL1,KIF11,PKMYT1,PLK1,PLK4,PRC1,PTTG1
Ferroptosis Signaling Pathway	3.04	0.774597	0.114	ACSL4,ALOX15,ALOXE3,CHAC1,CTSB,CYBB,FANCD2,FTL,GCH1,HMOX1,RASD1,RASD2,RBL1,SLC7A11,STEAP3
Role of Osteoblasts, Osteoclasts and Chondrocytes in Rheumatoid Arthritis	2.9		0.0938	ACP5,ADAMTS4,BMP15,BMP3,CTSK,GSN,IGF1,IL18,IL1R2,IL1RN,IL6,MMP14,PIK3R5,SFRP5,SMAD6,SMAD9,SPP1,Tcf7,TNFRSF11A,WNT10A,WNT7B
IL-10 Signaling	2.85		0.139	CCR5,CD14,FCGR2A,FCGR2B,HMOX1,IL18,IL1R2,IL1RN,IL6,LBP
Antigen Presentation Pathway	2.79		0.179	CD74,CIITA,HLA-DQA1,HLA-DQB1,HLA-DRA,HLA-DRB5,LOC100909630/RT1-DMb
Axonal Guidance Signaling	2.78		0.0748	ADAMTS18,ADAMTS4,ARHGEF15,BMP15,BMP3,EFNB2,EGF,EPHA7,GLIS1,GNA15,GNAO1,GNAT2,IGF1,ITGAX,ITGB2,ITGB8,KCNJ12,MMP12,MMP14,MMP7,MYL2,MYL4,MYL7,PAPPA,PIK3R5,PLCB2,PLXNC1,PRKAR1B,RASD1,RASD2,SEMA3G,SEMA4A,TUBA1C,TUBB1,TUBB2B,TUBB4A,WNT10A,WNT7B
Cell Cycle: G2/M DNA Damage Checkpoint Regulation	2.78	-1.13389	0.16	AURKA,CCNB1,CDK1,CKS2,PKMYT1,PLK1,SFN,TOP2A
Pancreatic Adenocarcinoma Signaling	2.78	0.816497	0.111	BIRC5,CCNE1,CYP2E1,E2F3,E2F7,E2F8,EGF,HDAC9,HMOX1,PIK3R5,PLD3,RAD51,RBL1,TGFBR1
RHOGDI Signaling	2.75	0.301511	0.093	ACTA1,ACTC1,ACTG2,ARHGEF15,CD44,CDH17,ESR1,GNA15,GNAO1,GNAT2,ITGAX,ITGB2,ITGB8,MYH6,MYH7,MYL2,MYL4,MYL7,PIP5K1B,Rhou
Pulmonary Fibrosis Idiopathic Signaling Pathway	2.74	2.71069	0.0828	ACTA1,ACTC1,ACTG2,AREG,BIRC5,CAV1,CCN4,COL13A1,COL16A1,Col6a4,EFNB2,FGFR4,IL6,MMP12,MMP14,MMP19,MMP7,PIK3R5,PLAU,RASD1,RASD2,SERPINE1,Tcf7,TGFBR1,THBS1,WNT10A,WNT7B
Germ Cell-Sertoli Cell Junction Signaling	2.72		0.0994	A2M,ACTA1,ACTC1,ACTG2,ACTN2,GSN,LAMC3,MYO7A,PIK3R5,RASD1,RASD2,Rhou,TGFBR1,TUBA1C,TUBB1,TUBB2B,TUBB4A
Molecular Mechanisms of Cancer	2.67		0.0761	ADCY1,ARHGEF15,AURKA,BMP15,BMP3,CAMK2A,CASP6,CCNE1,CDK1,E2F3,E2F7,E2F8,FANCD2,GNA15,GNAO1,GNAT2,HDAC9,IHH,ITGAX,ITGB2,ITGB8,PIK3R5,PLCB2,PRKAR1B,RASD1,RASD2,RASGRF1,RBL1,Rhou,SMAD6,SMAD9,TGFBR1,WNT10A,WNT7B
Osteoarthritis Pathway	2.62	1.29099	0.089	ADAMTS4,Alpg,ANKH,CASP6,CCN4,ELF3,GLIS1,IHH,IL1R2,ITGAX,ITGB2,ITGB8,MMP12,PPARGC1A,S100A9,S1PR3,SMAD6,SMAD9,SPP1,Tcf7,TGFBR1
Cellular Effects of Sildenafil (Viagra)	2.52		0.101	ACTA1,ACTC1,ACTG2,ADCY1,KCNN4,MYH6,MYH7,MYL2,MYL4,MYL7,PDE2A,PLCB2,PRKAR1B,SLC4A11,SLC4A5
IL-4 Signaling	2.51		0.118	HLA-DQA1,HLA-DQB1,HLA-DRA,HLA-DRB5,IGHE,IRF4,LOC100909593/RT1-DMa,LOC100909630/RT1-DMb,PIK3R5,RASD1,RASD2
IL-8 Signaling	2.5	1.1547	0.0905	CSTB,CYBB,GNA15,GNAO1,GNAT2,HMOX1,ITGAX,ITGB2,KDR,MYL2,MYL7,NCF1,PIK3R5,PLCB2,PLD3,RASD1,RASD2,Rhou,TEK
Eicosanoid Signaling	2.48		0.132	ALOX15,CYSLTR1,PLA2G1B,PLA2G4E,PLA2G7,PTGER2,PTGES,PTGFR,TBXAS1
Fcγ Receptor-mediated Phagocytosis in Macrophages and Monocytes	2.48	2.11058	0.117	ACTA1,ACTC1,ACTG2,FCGR1A,FCGR2A,HCK,HMOX1,MYO5A,NCF1,PLD3,VAV1
Gap Junction Signaling	2.42		0.0909	ACTA1,ACTC1,ACTG2,ADCY1,CAV1,EGF,GJA3,GJB1,GJB6,PIK3R5,PLCB2,PRKAR1B,RASD1,RASD2,TUBA1C,TUBB1,TUBB2B,TUBB4A
Glioma Signaling	2.4	-0.447214	0.105	CAMK2A,E2F3,E2F7,E2F8,EGF,HDAC9,IDH1,IGF1,IGF2,PIK3R5,RASD1,RASD2,RBL1
GM-CSF Signaling	2.39	1.34164	0.129	BCL2A1,CAMK2A,CSF2RA,CSF2RB,HCK,PIK3R5,PIM1,RASD1,RASD2
Antioxidant Action of Vitamin C	2.34	-2.82843	0.107	CSF2RA,CSF2RB,GLRX,HMOX1,PLA2G1B,PLA2G4E,PLA2G7,PLCB2,PLD3,SLC2A1,SLC2A5,TXNRD3
Regulation of Actin-based Motility by Rho	2.21	-1.13389	0.103	ACTA1,ACTC1,ACTG2,GSN,ITGAX,ITGB2,ITGB8,MYL2,MYL4,MYL7,PIP5K1B,Rhou
Regulation of Cellular Mechanics by Calpain Protease	2.17		0.112	ACTN2,CCNA2,CCNE1,CDK1,EGF,ITGAX,ITGB2,ITGB8,RASD1,RASD2
Tight Junction Signaling	2.17		0.0899	ACTA1,ACTC1,ACTG2,CLDN10,CLDN4,CLDN6,CLDN8,MAGI2,MYH6,MYH7,MYL2,MYL4,MYL7,PRKAR1B,TGFBR1,TIAM1
Stearate Biosynthesis I (Animals)	2.15	1.63299	0.127	ACSBG1,ACSL4,Akr1c19,CYP2E1,FASN,PTGR1,TBXAS1,THEM5
Inhibition of Matrix Metalloproteases	2.12	-0.816497	0.154	A2M,MMP12,MMP14,MMP19,MMP7,THBS2
Acute Myeloid Leukemia Signaling	2.11	-1.34164	0.11	CSF2RA,CSF2RB,IDH1,KIT,PIK3R5,PIM1,RASD1,RASD2,SPI1,Tcf7
Human Embryonic Stem Cell Pluripotency	2.09		0.0904	BMP15,BMP3,FGFR4,GNA15,GNAO1,GNAT2,INHBA,NOG,PIK3R5,S1PR3,SMAD6,Tcf7,TGFBR1,WNT10A,WNT7B
PD-1, PD-L1 cancer immunotherapy pathway	2.08	-1.50756	0.104	CD80,CIP2A,FOXP3,HLA-DQA1,HLA-DQB1,HLA-DRA,HLA-DRB5,LOC100909593/RT1-DMa,LOC100909630/RT1-DMb,PDCD1,PIK3R5
DNA damage-induced 14-3-3σ Signaling	2.03		0.211	CCNB1,CCNE1,CDK1,SFN
RAC Signaling	2.02	2.44949	0.0942	ANK1,CD44,CYBB,IQGAP3,ITGAX,ITGB2,ITGB8,NCF1,PIK3R5,PIP5K1B,RASD1,RASD2,TIAM1
Role of BRCA1 in DNA Damage Response	2.01	0.707107	0.113	BARD1,E2F3,E2F7,E2F8,FANCA,FANCD2,PLK1,RAD51,RBL1
RHOA Signaling	1.99	-0.904534	0.0968	ACTA1,ACTC1,ACTG2,ANLN,IGF1,LPAR3,MYL2,MYL4,MYL7,MYLK2,MYLK3,PIP5K1B
Gustation Pathway	1.97	1.69775	0.0837	ADCY1,ASIC2,GABRR2,KCNJ12,KCNN4,LIPA,P2RX1,P2RY13,P2RY2,P2RY6,PLCB2,PRKAR1B,SCN10A,SCN3B,SCN4A,SLC5A1,TRPM5
LPS/IL-1 Mediated Inhibition of RXR Function	1.95	1.63299	0.0787	ACSBG1,ACSL4,APOE,CD14,CHST1,CYP2E1,CYP2F1,FABP3,FABP4,FABP5,FMO1,FMO2,HMGCS2,IL18,IL1R2,IL1RN,LBP,NR5A2,PPARGC1A,SULT2B1
Remodeling of Epithelial Adherens Junctions	1.95		0.118	ACTA1,ACTC1,ACTG2,ACTN2,TUBA1C,TUBB1,TUBB2B,TUBB4A
Hereditary Breast Cancer Signaling	1.92		0.0915	BARD1,CCNB1,CDK1,FANCA,FANCD2,GADD45G,HDAC9,PIK3R5,RAD51,RASD1,RASD2,SFN,UBD
Ovarian Cancer Signaling	1.91	1	0.0886	CD44,E2F3,EGF,HDAC9,MMP7,PIK3R5,PRKAR1B,RAD51,RASD1,RASD2,RBL1,Tcf7,WNT10A,WNT7B
PI3K Signaling in B Lymphocytes	1.9	1	0.0909	BLNK,BTK,C3,CAMK2A,CD19,CD79B,FCGR2B,Irs3,MALT1,PLCB2,RASD1,RASD2,VAV1
Primary Immunodeficiency Signaling	1.9		0.125	BLNK,BTK,CD19,CD4,CIITA,ICOS,IGHE
Hepatic Cholestasis	1.89		0.0838	ADCY1,CD14,ESR1,FGFR4,GCGR,IL18,IL1R2,IL1RN,IL6,LBP,NR5A2,OSM,PRKAR1B,TNFSF10,TNFSF13,Tnfsf9
Cyclins and Cell Cycle Regulation	1.88	2.64575	0.107	CCNA2,CCNB1,CCNE1,CDK1,E2F3,E2F7,E2F8,HDAC9,RBL1
Endothelin-1 Signaling	1.87	1.60357	0.0833	ADCY1,CASP6,GNA15,GNAO1,GNAT2,HMOX1,PIK3R5,PLA2G1B,PLA2G4E,PLA2G7,PLCB2,PLD3,PTGER2,RASD1,RASD2,SHE
Neurovascular Coupling Signaling Pathway	1.87	1.88562	0.08	ADORA1,ADORA2B,ENTPD3,GABRR2,GRIN2C,GRIN3A,KCNJ12,KCNJ5,KCNMB2,KCNN4,MAPT,P2RX1,PLA2G1B,PLA2G4E,PLA2G7,PLCB2,PRKAR1B,SLC16A1
Role of Macrophages, Fibroblasts and Endothelial Cells in Rheumatoid Arthritis	1.86		0.0732	ADAMTS4,C5AR1,CAMK2A,CCL2,FCGR1A,GNAO1,IL18,IL1R2,IL1RN,IL6,OSM,PIK3R5,PLCB2,RASD1,RASD2,SFRP5,Tcf7,TLR1,Tlr11,Tlr12,TLR5,TLR8,WNT10A,WNT7B
Bladder Cancer Signaling	1.81		0.0948	E2F3,EGF,HDAC9,MMP12,MMP14,MMP19,MMP7,RASD1,RASD2,RBL1,THBS1
Synaptic Long Term Potentiation	1.81	1.89737	0.0916	ADCY1,CAMK2A,GNA15,GRIN2C,GRIN3A,PLCB2,PPP1R14A,PPP1R3A,PPP1R3C,PRKAR1B,RASD1,RASD2
Hepatic Fibrosis Signaling Pathway	1.8	1.96116	0.0689	CCL2,CYBB,FTL,GLIS1,IL18,IL1R2,IL1RN,ITGAX,ITGB2,ITGB8,KDR,MYL2,MYL4,MYL7,MYLK2,MYLK3,NCF1,PIK3R5,PRKAR1B,RASD1,RASD2,Rhou,SERPINE1,SOD2,SPP1,Tcf7,TGFBR1,WNT10A,WNT7B
Glioma Invasiveness Signaling	1.78	2.23607	0.11	CD44,HMMR,PIK3R5,PLAU,PLAUR,RASD1,RASD2,Rhou
Integrin Signaling	1.78	-0.27735	0.0798	ACTA1,ACTC1,ACTG2,ACTN2,CAV1,GSN,ITGAX,ITGB2,ITGB8,MYL2,MYL7,MYLK2,MYLK3,PIK3R5,RASD1,RASD2,Rhou
Adrenomedullin signaling pathway	1.74	1.1547	0.0804	ADCY1,C3,GNA15,IL18,IL1RN,KCNN4,MATK,MYLK2,MYLK3,PIK3R5,PLCB2,PRKAR1B,RAMP2,RASD1,RASD2,SHE
Apelin Cardiac Fibroblast Signaling Pathway	1.74	-2	0.174	APLN,APLNR,IL6,SERPINE1
Cardiomyocyte Differentiation via BMP Receptors	1.74		0.174	MYH7,MYL2,SMAD6,SMAD9
Pulmonary Healing Signaling Pathway	1.74	1.5	0.0804	CCNB1,DLK1,EGF,HCK,KDR,MMP12,MMP14,MMP19,MMP7,RASD1,RASD2,SMAD9,Tcf7,THBS1,WNT10A,WNT7B
Role of IL-17F in Allergic Inflammatory Airway Diseases	1.74	2	0.128	CCL2,CCL4,CXCL10,CXCL6,IGF1,IL6
Vitamin-C Transport	1.74	2	0.174	GLRX,SLC2A1,STOM,TXNRD3
Creatine-phosphate Biosynthesis	1.73		0.4	CKM,CKMT2
ERK/MAPK Signaling	1.73	1.73205	0.0787	DUSP2,DUSP4,DUSP9,ELF3,ESR1,ITGAX,ITGB2,ITGB8,PIK3R5,PLA2G1B,PLA2G4E,PPP1R14A,PPP1R3A,PPP1R3C,PRKAR1B,RASD1,RASD2
Virus Entry via Endocytic Pathways	1.72		0.0962	ACTA1,ACTC1,ACTG2,AP3S1,CAV1,ITGB2,ITGB8,PIK3R5,RASD1,RASD2
Caveolar-mediated Endocytosis Signaling	1.71		0.107	ACTA1,ACTC1,ACTG2,CAV1,EGF,ITGAX,ITGB2,ITGB8
Neuroprotective Role of THOP1 in Alzheimer's Disease	1.71	-0.707107	0.0917	F11,GZMB,KLK6,MAPT,PRKAR1B,PRSS22,SERPINA3,TAC1,TMPRSS4,TMPRSS9,TPSAB1/TPSB2
Signaling by Rho Family GTPases	1.71	0	0.0746	ACTA1,ACTC1,ACTG2,ARHGEF15,CDH17,CYBB,DIAPH3,GNA15,GNAO1,GNAT2,ITGAX,ITGB2,ITGB8,MYL2,MYL4,MYL7,NCF1,PIK3R5,PIP5K1B,Rhou
Apelin Muscle Signaling Pathway	1.7		0.125	APLN,APLNR,GNA15,GNAO1,GNAT2,PPARGC1A
SNARE Signaling Pathway	1.7	-1.1547	0.0882	ADCY1,CAMK2A,MYH6,MYH7,MYL2,MYL4,MYL7,PRKAR1B,RAB39A,SNAP91,SNCG,SYT13
Wound Healing Signaling Pathway	1.7	2.06474	0.0754	COL13A1,COL16A1,Col6a4,EGF,IL18,IL1R2,IL1RN,IL6,Mcpt4,OSM,PF4,RASD1,RASD2,TAC1,TGFBR1,TNFSF10,TNFSF13,Tnfsf9,TPSAB1/TPSB2
Calcium Signaling	1.69	0.377964	0.078	ACTA1,ACTC1,CAMK2A,CASQ2,CHRNA4,GRIN2C,GRIN3A,HDAC9,MYH6,MYH7,MYL2,MYL4,MYL7,PRKAR1B,TNNC1,TNNI3,TNNT2
Factors Promoting Cardiogenesis in Vertebrates	1.68	-1.38675	0.085	BMP15,BMP3,CAMK2A,MYH6,MYH7,MYL2,NOG,PLCB2,SMAD9,Tcf7,TGFBR1,WNT10A,WNT7B
Macropinocytosis Signaling	1.68		0.105	CD14,EGF,ITGB2,ITGB8,MRC1,PIK3R5,RASD1,RASD2
IL-17 Signaling	1.65	2.84019	0.0802	CCL17,CCL2,CCL22,CXCL3,IL18,IL6,LCN2,OSM,PIK3R5,RASD1,RASD2,RGS13,TNFSF10,TNFSF13,Tnfsf9
Sperm Motility	1.65	1.63299	0.0745	BTK,CSF2RA,ERBB4,FGFR4,GNA15,GNAO1,GNAT2,HCK,KDR,KIT,MATK,PDE2A,PLA2G1B,PLA2G4E,PLA2G7,PLCB2,PRKAR1B,ROS1,TEK
Glioblastoma Multiforme Signaling	1.64	1.13389	0.0819	CCNE1,E2F3,E2F7,E2F8,EGF,IGF1,IGF2,PIK3R5,PLCB2,RASD1,RASD2,Rhou,WNT10A,WNT7B
Role of IL-17A in Psoriasis	1.64		0.214	CXCL3,CXCL6,S100A9
IL-15 Production	1.63	0.301511	0.0894	BTK,CSF2RA,ERBB4,FGFR4,HCK,IL6,KDR,KIT,MATK,ROS1,TEK
Paxillin Signaling	1.62	-0.447214	0.0926	ACTA1,ACTC1,ACTG2,ACTN2,ITGAX,ITGB2,ITGB8,PIK3R5,RASD1,RASD2
Toll-like Receptor Signaling	1.62	2	0.103	CD14,IL18,IL1RN,LBP,TLR1,TLR5,TLR8,UBD
Apelin Endothelial Signaling Pathway	1.59	0	0.0851	ADCY1,APLN,APLNR,CCL2,GNA15,GNAO1,GNAT2,PIK3R5,PLCB2,RASD1,RASD2,TEK
Dopamine Receptor Signaling	1.59	0	0.101	ADCY1,GCH1,NCS1,PPP1R14A,PPP1R3A,PPP1R3C,PRKAR1B,SLC18A1
Gαs Signaling	1.59	2.12132	0.088	ADCY1,ADD2,ADORA2B,GNA15,GNAO1,GNAT2,HCK,MC2R,MC5R,PRKAR1B,PTGER2
Cardiac Hypertrophy Signaling	1.57	0.534522	0.0731	ADCY1,ADRA1A,ADRA2A,ADRA2B,GNA15,GNAO1,GNAT2,IGF1,IL6,MYL2,MYL4,MYL7,PIK3R5,PLCB2,PRKAR1B,RASD1,RASD2,Rhou,TGFBR1
Chemokine Signaling	1.56	0.816497	0.1	CAMK2A,CCL2,CCL4,CCR5,MYL2,PLCB2,RASD1,RASD2
Opioid Signaling Pathway	1.54	-0.258199	0.0714	ADCY1,CAMK2A,GNA15,GNAO1,GNAT2,GRIN2C,GRIN3A,HCK,KCNJ5,PENK,PRKAR1B,RASD1,RASD2,RGS1,RGS10,RGS13,RGS18,RGS6,RGS7,RGS9
Synaptogenesis Signaling Pathway	1.52	1.34164	0.0694	ADCY1,APOE,CAMK2A,CDH17,EFNB2,EPHA7,GRIN2C,GRIN3A,HCK,MAPT,NRXN2,PIK3R5,PRKAR1B,RASD1,RASD2,RASGRF1,SHE,SNCG,SYT13,THBS1,THBS2,TIAM1
Protein Kinase A Signaling	1.5	0.654654	0.066	ADCY1,ADD2,CAMK2A,Cdkn3,DUSP2,DUSP4,DUSP9,ENPP6,IHH,MYL2,MYL4,MYL7,MYLK2,MYLK3,PDE2A,PDE9A,PLCB2,PPP1R14A,PPP1R3A,PPP1R3C,PRKAR1B,PTPRN,SFN,SMPDL3A,Tcf7,TGFBR1,TNNI3
Acetone Degradation I (to Methylglyoxal)	1.48		0.125	Akr1c19,CYP2E1,CYP2F1,CYP4B1,PTGR1
Cardiac Hypertrophy Signaling (Enhanced)	1.48	1.56893	0.0627	ADCY1,ADRA1A,ADRA2A,ADRA2B,CAMK2A,CSF2RB,CYBB,DIAPH3,ENPP6,FGFR4,GNA15,HDAC9,IGF1,IL18,IL1R2,IL6,ITGAX,ITGB2,ITGB8,OSM,PDE2A,PDE9A,PIK3R5,PLCB2,PRKAR1B,RASD1,RASD2,SMPDL3A,TGFBR1,TNFSF10,TNFSF13,Tnfsf9,WNT10A,WNT7B
VEGF Signaling	1.46	-0.377964	0.0909	ACTA1,ACTC1,ACTG2,ACTN2,KDR,PIK3R5,RASD1,RASD2,SFN
TR/RXR Activation	1.45		0.0952	FASN,HP,PIK3R5,PPARGC1A,SLC16A3,SLC2A1,TRH,UCP3
NAD Biosynthesis from 2-amino-3-carboxymuconate Semialdehyde	1.44		0.286	NMNAT2,QPRT
Trehalose Degradation II (Trehalase)	1.44		0.286	HK2,HK3
Neuregulin Signaling	1.41	-0.447214	0.0855	AREG,EGF,ERBB4,EREG,ITGAX,ITGB2,ITGB8,MATK,RASD1,RASD2
PTEN Signaling	1.41	0.377964	0.08	FGFR4,ITGAX,ITGB2,ITGB8,KDR,MAGI2,MAGIX,PIK3R5,RASD1,RASD2,TGFBR1,TNFRSF11A
Role of Hypercytokinemia/hyperchemokinemia in the Pathogenesis of Influenza	1.4	2.82843	0.093	AREG,CCL2,CCL4,CXCL10,CXCL3,IL18,IL1RN,IL6
Sonic Hedgehog Signaling	1.4		0.138	CCNB1,CDK1,GLIS1,PRKAR1B
Airway Pathology in Chronic Obstructive Pulmonary Disease	1.39		0.0847	CCL2,CXCL3,GZMB,IL18,IL6,LCN2,OSM,TNFSF10,TNFSF13,Tnfsf9
PAK Signaling	1.39	-0.447214	0.0847	DSCAM,ITGAX,ITGB2,ITGB8,MYL2,MYL4,MYL7,PIK3R5,RASD1,RASD2
STAT3 Pathway	1.38	0.377964	0.0815	CSF2RB,EGF,FGFR4,IGF1,IL1R2,KDR,PIM1,RASD1,RASD2,TGFBR1,TNFRSF11A
BMP signaling pathway	1.37	-0.816497	0.092	BMP15,BMP3,NOG,PRKAR1B,RASD1,RASD2,SMAD6,SMAD9
CXCR4 Signaling	1.37	0.377964	0.0769	ADCY1,CD4,GNA15,GNAO1,GNAT2,MYL2,MYL4,MYL7,PIK3R5,PLCB2,RASD1,RASD2,Rhou
Oncostatin M Signaling	1.37		0.116	CHI3L1,OSM,PLAU,RASD1,RASD2
Differential Regulation of Cytokine Production in Macrophages and T Helper Cells by IL-17A and IL-17F	1.35		0.167	CCL2,CCL4,IL6
G Protein Signaling Mediated by Tubby	1.33		0.114	GNA15,GNAO1,GNAT2,PLCB2,TUB
Senescence Pathway	1.31	0.471405	0.0673	BHLHE40,CCNB1,CCNE1,CDK1,E2F3,E2F7,E2F8,ELF3,GADD45G,IL6,PIK3R5,RASD1,RASD2,RBL1,SERPINE1,SMAD6,SMAD9,SOD2,STING1,TGFBR1

## Sheet: Table S4b Pathways (Y-1)
Table S4. All significantly perturbed canonical pathways at each time point
Table S4b. All significantly perturbed canonical pathways at Year 1
Ingenuity Canonical Pathways	-log(p-value)	z-score	Ratio	Molecules
Complement System	14.5	1.38675	0.514	C1QA,C1QB,C1QC,C1S,C2,C3,C3AR1,C4A/C4B,C4BPA,C4BPB,C5AR1,C6,CFD,CFI,CR2,ITGAM,ITGAX,ITGB2,SERPING1
Agranulocyte Adhesion and Diapedesis	12.7		0.195	ACKR4,ACTA1,ACTC1,ACTG1,AOC3,C5AR1,CCL1,CCL11,CCL17,Ccl2,CCL2,CCL22,CCL28,CCL3L3,CCL4,Ccl7,Ccl9,CLDN10,CLDN11,CLDN4,CLDN6,CX3CL1,CXCL10,CXCL11,CXCL13,CXCL2,CXCL3,CXCL6,IL18,IL1RN,IL36B,ITGB2,MMP12,MMP14,MMP19,MMP7,MMP9,MYH11,MYH4,MYL2,PF4
Granulocyte Adhesion and Diapedesis	12.2		0.201	ACKR4,C5AR1,CCL1,CCL11,CCL17,Ccl2,CCL2,CCL22,CCL28,CCL3L3,CCL4,Ccl7,Ccl9,CLDN10,CLDN11,CLDN4,CLDN6,CX3CL1,CXCL10,CXCL11,CXCL13,CXCL2,CXCL3,CXCL6,IL18,IL1R2,IL1RL1,IL1RN,IL36B,ITGAM,ITGB2,MMP12,MMP14,MMP19,MMP7,MMP9,PF4,THY1
Phagosome Formation	10.2	4.52911	0.114	ACKR4,ADGRV1,ADORA1,ADORA2B,Adora3/LOC100911796,ADRA1A,ADRA2A,ADRA2B,C3,C3AR1,C5AR1,CARD9,CD14,Chrm2,CHRM3,CLEC4E,CR2,CYSLTR1,FCER2,FCGR1A,FCGR2A,FCGR2B,GALR1,GALR3,GCGR,GPR176,GPR183,GPR34,GPR50,GPR68,GPR84,HCAR2,HCK,HMOX1,HTR2B,Igh-6,ITGAM,ITGAX,ITGB2,ITGB8,LBP,LPAR3,MALT1,MAPK15,MARCO,MC5R,MSR1,MYH11,MYH4,MYL2,MYLK2,MYLK3,Npy4r,P2RY12,P2RY13,P2RY2,P2RY6,PIP5K1B,PLA2G1B,PLA2G2A,PLA2G4E,PLA2G7,P…
Neuroinflammation Signaling Pathway	8.95	1.47959	0.142	ACVR1C,CCL2,CD200R1,CD80,CD86,CX3CL1,CXCL10,CYBB,GABRR1,GABRR2,GJB1,GRIA1,GRIN2C,GRIN2D,GRIN3A,HLA-DQA1,HLA-DQB1,HLA-DRA,HLA-DRB5,HMOX1,IL12B,IL18,MAPK10,MAPK15,MAPT,MMP9,NCF1,NTF3,PLA2G1B,PLA2G2A,PLA2G4E,PRKCG,RT1-DMa,RT1-DMb,SLC6A12,SOD2,TGFBR1,TGFBR3,TICAM2,TLR1,Tlr11,Tlr12,Tlr13,TLR2,TYROBP
Acute Phase Response Signaling	8.06	3.5	0.168	A2M,AGT,C1QA,C1QB,C1QC,C1S,C2,C3,C4A/C4B,C4BPA,C4BPB,FGG,FTL,HMOX1,HP,HPX,IL18,IL1RN,IL36B,ITIH4,LBP,NFKBIE,ORM1,OSM,OSMR,RASD2,SERPINE1,SERPINF1,SERPING1,SOD2,TF
CREB Signaling in Neurons	6.77	1.0328	0.104	ACKR4,ADCY1,ADCY5,ADGRV1,ADORA1,ADORA2B,Adora3/LOC100911796,ADRA1A,ADRA2A,ADRA2B,C3AR1,C5AR1,CACNA1D,CACNA1H,CACNB4,CAMK2A,CAMK4,Chrm2,CHRM3,CYSLTR1,FGFR4,GALR1,GALR3,GCGR,GNAO1,GNAT2,GNAZ,GPR176,GPR183,GPR34,GPR50,GPR68,GPR84,GRIA1,GRIN2C,GRIN2D,HCAR2,HTR2B,IGF1,LPAR3,MC5R,Npy4r,NTRK1,NTRK2,P2RY12,P2RY13,P2RY2,P2RY6,PLCE1,PRKAR1B,PRKCG,PRLHR,PTAFR,PTGER2,PTGFR,RASD2,S1PR3,SCTR,SSTR1,TGFBR1,TGFBR…
Leukocyte Extravasation Signaling	6.53	2.04124	0.15	ACTA1,ACTC1,ACTG1,ACTN2,BTK,CD44,CLDN10,CLDN11,CLDN4,CLDN6,CYBA,CYBB,EDIL3,ITGAM,ITGB2,ITK,MAPK10,MMP12,MMP14,MMP19,MMP7,MMP9,NCF1,NCF4,PRKCG,TEC,THY1,TIMP1,TIMP4
Neurovascular Coupling Signaling Pathway	6.53	0.707107	0.142	ADORA1,ADORA2B,CACNA1D,CACNA1H,CACNB4,CAMK4,Chrm2,CHRM3,CTH,CYP4A22,ENTPD3,GABRR1,GABRR2,GJA1,GRIA1,GRIN2C,GRIN2D,GRIN3A,GUCY1A2,KCNJ11,KCNMB2,KCNMB4,KCNN4,MAPT,NPR3,P2RX1,PLA2G1B,PLA2G2A,PLA2G4E,PLA2G7,PRKAR1B,RYR2
Atherosclerosis Signaling	6.52		0.176	ALOX12,ALOX15,APOE,CCL11,CCL2,CMA1,F3,IL18,IL1RN,IL36B,ITGB2,LYZ,MMP9,MSR1,ORM1,PCYOX1,PLA2G1B,PLA2G2A,PLA2G4E,PLA2G7,S100A8,TNFRSF12A,TPSAB1/TPSB2
TREM1 Signaling	6.44	4.12311	0.221	CCL2,CD83,CD86,CXCL3,FCGR2B,IL18,IL1RL1,ITGAX,LAT2,NLRP6,TLR1,Tlr11,Tlr12,Tlr13,TLR2,TREM1,TYROBP
LXR/RXR Activation	6.41	-0.218218	0.179	AGT,APOE,C3,C4A/C4B,CCL2,CD14,HPX,IL18,IL1R2,IL1RL1,IL1RN,IL36B,ITIH4,LBP,LYZ,MMP9,MSR1,ORM1,PCYOX1,S100A8,SERPINF1,TF
Th2 Pathway	5.59	1.38675	0.161	ACVR1C,CD4,CD80,CD86,CRLF2,DLL1,HLA-DQA1,HLA-DQB1,HLA-DRA,HLA-DRB5,IL12B,IL12RB1,IL1RL1,IL24,ITGB2,RT1-DMa,RT1-DMb,SPI1,TBX21,TGFBR1,TGFBR3,TNFRSF4
G-Protein Coupled Receptor Signaling	5.51	0.492366	0.094	ACKR4,ADCY1,ADCY5,ADGRV1,ADORA1,ADORA2B,Adora3/LOC100911796,ADRA1A,ADRA2A,ADRA2B,C3AR1,C5AR1,CAMK2A,CAMK4,Chrm2,CHRM3,CYSLTR1,DUSP4,DUSP9,GALR1,GALR3,GCGR,GNAO1,GNAT2,GNAZ,GPR176,GPR183,GPR34,GPR50,GPR68,GPR84,HCAR2,HCN4,HTR2B,KCNH2,KCNN4,LPAR3,MAPK10,MC5R,MYL2,MYLK2,MYLK3,NFKBIE,NPR3,Npy4r,P2RY12,P2RY13,P2RY2,P2RY6,PDE2A,PLCE1,PRKAR1B,PRKCG,PRLHR,PTAFR,PTGER2,PTGFR,RASD2,RGS10,RGS18,S1PR3,SCTR,S…
Th1 and Th2 Activation Pathway	5.45		0.145	ACVR1C,CD4,CD80,CD86,CRLF2,DLL1,DLL4,HAVCR2,HLA-DQA1,HLA-DQB1,HLA-DRA,HLA-DRB5,IL12B,IL12RB1,IL18,IL1RL1,IL24,ITGB2,RT1-DMa,RT1-DMb,SPI1,TBX21,TGFBR1,TGFBR3,TNFRSF4
Kinetochore Metaphase Signaling Pathway	4.75	2.49615	0.162	BUB1B,CCNB1,CDK1,CENPA,CENPH,DNAH1,DNAH3,DNALI1,ESPL1,KIF2C,KNTC1,MAD2L1,MASTL,NDC80,NUF2,PLK1,SPC25,TTK
Gustation Pathway	4.64	0.784465	0.128	ADCY1,ADCY5,ASIC2,CACNA1D,CACNA1H,CACNB4,CHRM3,GABRR1,GABRR2,KCNH2,KCNJ11,KCNN4,LIPA,P2RX1,P2RX4,P2RY12,P2RY13,P2RY2,P2RY6,PRKAR1B,SCN10A,SCN3B,SCN4A,SCN8A,SLC5A1,TRPM5
FXR/RXR Activation	4.52		0.151	ABCB11,AGT,APOE,C3,C4A/C4B,FBP1,FETUB,FGFR4,HPX,IL18,IL1RN,IL36B,ITIH4,MAPK10,ORM1,PCYOX1,PPARGC1A,SERPINF1,TF
Phagosome Maturation	4.1		0.133	ATP6V0D2,ATP6V1B2,CTSA,CTSB,CTSD,CTSH,CTSK,CTSS,CTSZ,CYBB,HLA-DRA,HLA-DRB5,LPO,NCF1,PRDX5,RAB7B,TCIRG1,TUBA1C,TUBB2B,TUBB3,TUBB4A
Sertoli Cell-Sertoli Cell Junction Signaling	4.09		0.121	A2M,ACTA1,ACTC1,ACTG1,ACTN2,CLDN10,CLDN11,CLDN4,CLDN6,GUCY1A2,ITGAM,ITGAX,ITGB2,ITGB8,MAGI2,MAPK10,MYO7A,PRKAR1B,RASD2,SPTB,TGFBR3,TUBA1C,TUBB2B,TUBB3,TUBB4A
CLEAR Signaling Pathway	4.01	-0.179605	0.109	ATP6V0D2,ATP6V1B2,CD63,CTSA,CTSB,CTSD,FGFR4,GAA,GUSB,HEXA,IFI30,IGF1,KCNIP3,MAPK15,NAGLU,NTRK1,NTRK2,PPARGC1A,PRKCG,PSAP,RASD2,SFN,TCIRG1,TGFBR1,TGFBR3,TLR1,Tlr11,Tlr12,Tlr13,TLR2,TNFRSF11A
cAMP-mediated signaling	3.96	-1.1767	0.115	ADCY1,ADCY5,ADORA1,ADORA2B,ADRA2A,ADRA2B,AKAP12,CAMK2A,CAMK4,CHRM3,DUSP4,DUSP9,GNAO1,HCAR2,MC5R,NPR3,P2RY12,P2RY13,PDE2A,PKIB,PRKAR1B,PTGER2,RGS10,RGS18,S1PR3,SMPDL3A,XCR1
Breast Cancer Regulation by Stathmin1	3.95	2.33513	0.0892	ACKR4,ADGRV1,ADORA1,ADORA2B,Adora3/LOC100911796,ADRA1A,ADRA2A,ADRA2B,C3AR1,C5AR1,CAMK2A,CAMK4,CDK1,Chrm2,CHRM3,CYSLTR1,E2F3,E2F8,GALR1,GALR3,GCGR,GPR176,GPR183,GPR34,GPR50,GPR68,GPR84,HCAR2,HTR2B,IGF1,LPAR3,MC5R,MMP9,Npy4r,P2RY12,P2RY13,P2RY2,P2RY6,PRKAR1B,PRKCG,PRLHR,PTAFR,PTGER2,PTGFR,RASD2,S1PR3,SCTR,SSTR1,TUBA1C,TUBB2B,TUBB3,TUBB4A,XCR1
Inhibition of Matrix Metalloproteases	3.84	-1	0.231	A2M,MMP12,MMP14,MMP19,MMP7,MMP9,THBS2,TIMP1,TIMP4
LPS/IL-1 Mediated Inhibition of RXR Function	3.78	1.13389	0.11	ABCB11,ACSBG1,ALDH1L2,ALDH3A1,APOE,CD14,CHST1,CHST15,CHST3,Cyp2a1,CYP2D6,CYP2E1,CYP2F1,FABP4,FABP5,FMO2,FMO3,HMGCS2,HS3ST3B1,HS6ST2,IL18,IL1R2,IL1RL1,IL1RN,IL36B,LBP,NDST2,PPARGC1A
Th1 Pathway	3.68	1.60357	0.139	CD4,CD80,CD86,DLL1,DLL4,HAVCR2,HLA-DQA1,HLA-DQB1,HLA-DRA,HLA-DRB5,IL12B,IL12RB1,IL18,ITGB2,RT1-DMa,RT1-DMb,TBX21
Hepatic Fibrosis / Hepatic Stellate Cell Activation	3.67		0.119	A2M,AGT,CCL2,CD14,COL16A1,COL23A1,Col6a4,CXCL3,CYP2E1,IGF1,IGF2,IGFBP3,IL1R2,IL1RL1,LBP,LEPR,MMP9,MYH11,MYH4,MYL2,SERPINE1,TGFBR1,TIMP1
Crosstalk between Dendritic Cells and Natural Killer Cells	3.58	2.33333	0.154	ACTA1,ACTC1,ACTG1,CAMK2A,CD80,CD83,CD86,CSF2RB,HLA-DRA,HLA-DRB5,IL12B,IL18,TLN2,TYROBP
Gap Junction Signaling	3.54		0.116	ACTA1,ACTC1,ACTG1,ADCY1,ADCY5,CAV1,CTH,GJA1,GJA3,GJB1,GJB6,GRIA1,GUCY1A2,HTR2B,NPR3,PLCE1,PRKAR1B,PRKCG,RASD2,TUBA1C,TUBB2B,TUBB3,TUBB4A
Iron homeostasis signaling pathway	3.5		0.13	ALAS2,ATP6V0D2,ATP6V1B2,BMP15,BMP3,CD163,FTL,Hba-a1/Hba-a2,HBB,HIF3A,HMOX1,HP,HPX,SLC11A1,STEAP3,TCIRG1,TF,TMPRSS6
Dilated Cardiomyopathy Signaling Pathway	3.49	-1.06904	0.127	ACTA1,ACTC1,ACTG1,ADCY1,ADCY5,CACNA1D,CACNA1H,CACNB4,CAMK2A,CAMK4,CNN1,MYH11,MYH4,MYL2,PDE2A,PRKAR1B,RBM20,RYR2,TNNT1
Wound Healing Signaling Pathway	3.46	2.88675	0.107	ACVR1C,CMA1,COL16A1,COL23A1,Col6a4,IL12B,IL18,IL1R2,IL1RL1,IL1RN,IL36B,KRT17,MAPK10,Mcpt1,Mcpt4,MMP9,NFKBIE,OSM,PF4,RASD2,TGFBR1,TGFBR3,TNFSF13,TNFSF8,Tnfsf9,TPSAB1/TPSB2,TRPA1
Gαi Signaling	3.42	0.83205	0.129	ADCY1,ADCY5,ADORA1,ADRA2A,ADRA2B,CAV1,GNAO1,GNAT2,GNAZ,HCAR2,NPR3,P2RY12,P2RY13,PRKAR1B,RASD2,RGS10,S1PR3,XCR1
Hepatic Cholestasis	3.36		0.115	ABCB11,ADCY1,ADCY5,CD14,ESR1,FGFR4,GCGR,IL12B,IL18,IL1R2,IL1RL1,IL1RN,IL36B,LBP,MAPK10,NFKBIE,OSM,PRKAR1B,PRKCG,TNFSF13,TNFSF8,Tnfsf9
Hepatic Fibrosis Signaling Pathway	3.34	1.37199	0.0922	ACVR1C,AGT,CACNA1D,CACNB4,CAMK4,CCL2,CYBB,FTL,GLIS1,IL18,IL1R2,IL1RL1,IL1RN,IL36B,ITGAM,ITGAX,ITGB2,ITGB8,LEPR,MAPK10,MYL2,MYLK2,MYLK3,NCF1,NFKBIE,PRKAR1B,PRKCG,RASD2,RND1,SERPINE1,SOD2,SPP1,TF,TGFBR1,TGFBR3,TIMP1,WNT10A,WNT2B,WNT7B
Role of Pattern Recognition Receptors in Recognition of Bacteria and Viruses	3.28	1.89737	0.122	C1QA,C1QB,C1QC,C3,C3AR1,C5AR1,IL12B,IL18,IL36B,MAPK10,OSM,PRKCG,PTX3,TLR1,Tlr11,TLR2,TNFSF13,TNFSF8,Tnfsf9
B Cell Development	3.26		0.196	CD80,CD86,HLA-DQA1,HLA-DQB1,HLA-DRA,HLA-DRB5,Igh-6,RT1-DMa,RT1-DMb
Role of Osteoblasts, Osteoclasts and Chondrocytes in Rheumatoid Arthritis	3.15		0.107	ACP5,ADAMTS5,BMP15,BMP3,CAMK4,CTSK,FRZB,GSN,IGF1,IL18,IL1R2,IL1RL1,IL1RN,IL36B,MAPK10,MMP14,NFKBIE,SFRP5,SMAD6,SPP1,TNFRSF11A,WNT10A,WNT2B,WNT7B
Toll-like Receptor Signaling	3.15	2.64575	0.154	CD14,IL12B,IL18,IL1RL1,IL1RN,IL36B,LBP,RPS27A,TICAM2,TLR1,TLR2,UBD
Antioxidant Action of Vitamin C	3.13	-2.11058	0.134	CSF2RA,CSF2RB,GLRX,HMOX1,MAPK10,NFKBIE,PLA2G1B,PLA2G2A,PLA2G4E,PLA2G7,PLCE1,PLD3,SLC2A1,SLC2A5,TXNRD3
Eicosanoid Signaling	3.12	2	0.162	ALOX12,ALOX15,CYSLTR1,PLA2G1B,PLA2G2A,PLA2G4E,PLA2G7,PTGER2,PTGES,PTGFR,TBXAS1
MSP-RON Signaling Pathway	3.11		0.172	ACTA1,ACTC1,ACTG1,CCL2,CSF2RB,IL12B,ITGAM,ITGB2,KLK13,TLR2
Cellular Effects of Sildenafil (Viagra)	3.06		0.12	ACTA1,ACTC1,ACTG1,ADCY1,ADCY5,CACNA1D,CACNB4,CAMK4,GUCY1A2,KCNH2,KCNN4,MYH11,MYH4,MYL2,PDE2A,PLCE1,PRKAR1B,SLC4A5
Sperm Motility	3.04	0.301511	0.102	BTK,CACNA1H,CAMK4,CSF2RA,ERBB4,FGFR4,GNAO1,GNAT2,GNAZ,GUCY1A2,HCK,ITK,MATK,NTRK1,NTRK2,PDE2A,PLA2G1B,PLA2G2A,PLA2G4E,PLA2G7,PLCE1,PRKAR1B,PRKCG,PTK6,TEC,TEK
IL-10 Signaling	2.91		0.153	CD14,FCGR2A,FCGR2B,HMOX1,IL18,IL1R2,IL1RL1,IL1RN,IL36B,LBP,NFKBIE
Cardiac Hypertrophy Signaling (Enhanced)	2.8	-0.507093	0.083	ACVR1C,ADCY1,ADCY5,ADRA1A,ADRA2A,ADRA2B,AGT,CACNA1D,CACNB4,CAMK2A,CAMK4,CSF2RB,CYBB,DIAPH3,FGFR4,HDAC9,IGF1,IL12B,IL12RB1,IL18,IL1R2,IL1RL1,IL36B,ITGAM,ITGAX,ITGB2,ITGB8,MAPK10,MYOCD,OSM,PDE2A,PLCE1,PRKAR1B,PRKCG,RASD2,RYR2,SMPDL3A,TGFBR1,TGFBR3,TNFSF13,TNFSF8,Tnfsf9,WNT10A,WNT2B,WNT7B
Estrogen-mediated S-phase Entry	2.72	2.44949	0.231	CCNA2,CCNE1,CDK1,E2F3,E2F8,ESR1
Endocannabinoid Neuronal Synapse Pathway	2.68	-1.60357	0.114	ADCY1,ADCY5,CACNA1D,CACNA1H,CACNB4,DNAH1,DNAH3,DNALI1,GNAO1,GRIA1,GRIN2C,GRIN2D,GRIN3A,MAPK10,MAPK15,PLCE1,PRKAR1B
Human Embryonic Stem Cell Pluripotency	2.56		0.108	BMP15,BMP3,FGFR4,GNAO1,GNAT2,GNAZ,INHBA,NOG,NTF3,NTRK1,NTRK2,S1PR3,SMAD6,SOX2,TGFBR1,WNT10A,WNT2B,WNT7B
HIF1α Signaling	2.51	2.4004	0.101	CAMK2A,CAMK4,CYBB,FOXP3,HK2,HK3,HMOX1,IGF1,IGF2,MMP12,MMP14,MMP19,MMP7,MMP9,NCF1,PRKCG,RASD2,SERPINE1,SLC2A1,SLC2A5,TF
Opioid Signaling Pathway	2.49	-1.96396	0.0932	ADCY1,ADCY5,CACNA1D,CACNA1H,CACNB4,CAMK2A,CAMK4,FOSB,GNAO1,GNAT2,GNAZ,GRIN2C,GRIN2D,GRIN3A,HCK,MAPK15,PENK,PRKAR1B,PRKCG,RASD2,RGS1,RGS10,RGS18,RGS6,RGS9,RYR2
Fcγ Receptor-mediated Phagocytosis in Macrophages and Monocytes	2.44	1.73205	0.128	ACTA1,ACTC1,ACTG1,FCGR1A,FCGR2A,HCK,HMOX1,MYO5A,NCF1,PLD3,PRKCG,TLN2
GABA Receptor Signaling	2.42		0.114	ADCY1,ADCY5,CACNA1D,CACNA1H,CACNB4,GABRR1,GABRR2,GNAO1,GNAT2,GNAZ,KCNH2,KCNN4,RPS27A,SLC6A12,UBD
SPINK1 Pancreatic Cancer Pathway	2.42	-2.33333	0.15	CPA3,CPA4,CPB2,CPE,CTSA,CTSB,KLK13,MMP12,TGFBR1
Adrenomedullin signaling pathway	2.4	-1	0.101	ADCY1,ADCY5,C3,CAMK4,CTH,GUCY1A2,IL18,IL1RN,IL36B,KCNH2,KCNN4,MAPK10,MAPK15,MATK,MYLK2,MYLK3,NPR3,PLCE1,PRKAR1B,RASD2
Synaptogenesis Signaling Pathway	2.34	0	0.0889	ADCY1,ADCY5,APOE,CACNB4,CAMK2A,CAMK4,CDH17,CDH19,CDH4,CDH9,EPHA7,GRIA1,GRIN2C,GRIN2D,GRIN3A,HCK,MAP1B,MAPT,NTRK2,PRKAR1B,RASD2,RASGRF1,SNCG,SYT13,SYT6,THBS1,THBS2,TIAM1
Actin Cytoskeleton Signaling	2.32	0.534522	0.0943	ACTA1,ACTC1,ACTG1,ACTN2,CD14,DIAPH3,GSN,IQGAP3,ITGAM,ITGAX,ITGB2,ITGB8,LBP,MATK,MYH11,MYH4,MYL2,MYLK2,MYLK3,PIP5K1B,RASD2,TIAM1,TLN2
Role of IL-17A in Psoriasis	2.31	2	0.286	CXCL3,CXCL6,S100A8,S100A9
IL-12 Signaling and Production in Macrophages	2.29		0.11	ALOX12,ALOX15,APOE,IL12B,IL12RB1,IL18,LYZ,MAPK10,NFKBIE,ORM1,PCYOX1,PRKCG,S100A8,SPI1,TLR2
Gαs Signaling	2.24	0.904534	0.112	ADCY1,ADCY5,ADD2,ADORA2B,CHRM3,GNAO1,GNAT2,GNAZ,HCAR2,HCK,MC5R,PRKAR1B,PTGER2,RYR2
RHOGDI Signaling	2.23	-0.301511	0.0955	ACTA1,ACTC1,ACTG1,CD44,CDH17,CDH19,CDH4,CDH9,ESR1,GNAO1,GNAT2,GNAZ,ITGAM,ITGAX,ITGB2,ITGB8,MYH11,MYH4,MYL2,PIP5K1B,RND1
Tumor Microenvironment Pathway	2.22	2.82843	0.101	ARG1,CCL2,CD44,CSPG4,IGF1,IGF2,LEPR,MMP12,MMP14,MMP19,MMP7,MMP9,OSM,PLAU,RASD2,SLC2A1,SPP1,TIAM1
Glucocorticoid Receptor Signaling	2.21		0.0772	A2M,AGT,CAV1,CCL11,CCL2,CD163,CSF2RB,CXCL3,DNAH1,DNAH3,DNALI1,ESR1,FBP1,FCGR1A,FGG,GJA1,H2-M2,HLA-DQA1,HLA-DQB1,HLA-DRA,HLA-DRB5,HP,IGF1,IL12RB1,IL1R2,IL1RL1,IL1RN,KRT14,KRT17,KRT5,MAPK10,MMP9,NFKBIE,PFKFB1,PGR,PLA2G1B,PLA2G2A,PLA2G4E,PLAU,RASD2,RT1-DMa,RT1-DMb,SERPINE1,TGFBR1,TLR2
Acetone Degradation I (to Methylglyoxal)	2.19	-1.34164	0.163	AKR1B10,Akr1c19,CYP2D6,CYP2E1,CYP2F1,CYP4A22,CYP4B1
Neuropathic Pain Signaling In Dorsal Horn Neurons	2.19	-0.57735	0.119	CAMK2A,CAMK4,GRIA1,GRIN2C,GRIN2D,GRIN3A,KCNH2,KCNN4,NTRK2,PLCE1,PRKAR1B,PRKCG
Osteoarthritis Pathway	2.19	1.60357	0.0932	ADAMTS5,ELF3,FRZB,GLIS1,IHH,IL1R2,IL1RL1,ITGAM,ITGAX,ITGB2,ITGB8,MMP12,MMP9,MTF1,PPARGC1A,S100A8,S100A9,S1PR3,SMAD6,SPP1,TGFBR1,TLR2
Synaptic Long Term Depression	2.14	-1.69775	0.0969	CACNA1D,CACNA1H,CACNB4,CTH,GNAO1,GNAT2,GNAZ,GRIA1,GUCY1A2,IGF1,NPR3,PLA2G1B,PLA2G2A,PLA2G4E,PLA2G7,PLCE1,PRKCG,RASD2,RYR2
IL-8 Signaling	2.14	0.83205	0.0952	CR2,CSTB,CYBB,GNAO1,GNAT2,GNAZ,HMOX1,ITGAM,ITGAX,ITGB2,MAPK10,MMP9,MYL2,NCF1,NFKBIE,PLD3,PRKCG,RASD2,RND1,TEK
MIF Regulation of Innate Immunity	2.13	1.88982	0.159	CD14,CD74,MAPK10,NFKBIE,PLA2G1B,PLA2G2A,PLA2G4E
N-acetylglucosamine Degradation I	2.1		0.667	AMDHD2,GNPDA1
Colorectal Cancer Metastasis Signaling	2.07	2.35702	0.0886	ADCY1,ADCY5,GNAO1,GNAT2,GNAZ,MAPK10,MMP12,MMP14,MMP19,MMP7,MMP9,PRKAR1B,PTGER2,RASD2,RND1,TGFBR1,TLR1,Tlr11,Tlr12,Tlr13,TLR2,WNT10A,WNT2B,WNT7B
Coagulation System	2.05	0.816497	0.171	A2M,F3,FGG,PLAU,PLAUR,SERPINE1
Ferroptosis Signaling Pathway	2.03	1.94145	0.106	ALOX12,ALOX15,CHAC1,CTH,CTSB,CYBB,EMP1,FTL,GCH1,HMOX1,RASD2,SLC7A11,STEAP3,TF
Pathogenesis of Multiple Sclerosis	2.02		0.333	CCL4,CXCL10,CXCL11
WNT/β-catenin Signaling	2	1.06904	0.0977	ACVR1C,CD44,CDKN2A,FRZB,GJA1,GNAO1,MMP7,RPS27A,SFRP5,SOX2,SOX5,TGFBR1,TGFBR3,UBD,WNT10A,WNT2B,WNT7B
MIF-mediated Glucocorticoid Regulation	1.99	2.44949	0.167	CD14,CD74,NFKBIE,PLA2G1B,PLA2G2A,PLA2G4E
Neuroprotective Role of THOP1 in Alzheimer's Disease	1.97	1.89737	0.107	AGT,CFD,CMA1,FAP,HPN,MAPT,MMP9,PRKAR1B,PRSS22,Prss30,TMPRSS4,TMPRSS9,TPSAB1/TPSB2
Calcium Signaling	1.95	-1.94145	0.0913	ACTA1,ACTC1,ATP2B4,CACNA1D,CACNA1H,CACNB4,CAMK2A,CAMK4,CHRNA4,GRIA1,GRIN2C,GRIN2D,GRIN3A,HDAC9,MYH11,MYH4,MYL2,PRKAR1B,RYR2,TNNT1
STAT3 Pathway	1.95	0.333333	0.104	CSF2RB,FGFR4,IGF1,IL12RB1,IL1R2,IL1RL1,MAPK10,NTRK1,NTRK2,PIM1,RASD2,TGFBR1,TGFBR3,TNFRSF11A
Axonal Guidance Signaling	1.94		0.0766	ADAMTS18,ADAMTS5,BMP15,BMP3,EPHA7,GLIS1,GNAO1,GNAT2,GNAZ,IGF1,ITGAM,ITGAX,ITGB2,ITGB8,MMP12,MMP14,MMP7,MMP9,MYL2,NTF3,NTRK1,NTRK2,PLCE1,PRKAR1B,PRKCG,RASD2,RND1,ROBO2,SEMA4A,SHANK2,SRGAP3,TUBA1C,TUBB2B,TUBB3,TUBB4A,UNC5D,WNT10A,WNT2B,WNT7B
Gluconeogenesis I	1.92	-0.447214	0.185	ENO2,ENO4,FBP1,FBP2,MDH1B
Endothelin-1 Signaling	1.91	0.242536	0.0938	ADCY1,ADCY5,GNAO1,GNAT2,GNAZ,GUCY1A2,HMOX1,MAPK10,MAPK15,PLA2G1B,PLA2G2A,PLA2G4E,PLA2G7,PLCE1,PLD3,PRKCG,PTGER2,RASD2
Factors Promoting Cardiogenesis in Vertebrates	1.87	-2.32379	0.0987	ACVR1C,BMP15,BMP3,CAMK2A,MAPK10,MYL2,MYOCD,NOG,PLCE1,PRKCG,TGFBR1,TGFBR3,WNT10A,WNT2B,WNT7B
Cell Cycle: G2/M DNA Damage Checkpoint Regulation	1.83	-0.816497	0.14	CCNB1,CDK1,CDKN2A,CKS2,PLK1,SFN,TOP2A
N-acetylglucosamine Degradation II	1.82		0.5	AMDHD2,GNPDA1
Antigen Presentation Pathway	1.82		0.154	CD74,HLA-DQA1,HLA-DQB1,HLA-DRA,HLA-DRB5,RT1-DMb
DNA damage-induced 14-3-3σ Signaling	1.81		0.211	CCNB1,CCNE1,CDK1,SFN
Germ Cell-Sertoli Cell Junction Signaling	1.77		0.0941	A2M,ACTA1,ACTC1,ACTG1,ACTN2,GSN,LAMC3,MAPK10,MYO7A,RASD2,RND1,TGFBR1,TUBA1C,TUBB2B,TUBB3,TUBB4A
Regulation of Cellular Mechanics by Calpain Protease	1.75		0.112	ACTN2,CCNA2,CCNE1,CDK1,ITGAM,ITGAX,ITGB2,ITGB8,RASD2,TLN2
Apelin Adipocyte Signaling Pathway	1.69	-0.707107	0.11	ADCY1,ADCY5,CYBB,GPX1,MAPK10,MAPK15,NCF1,PPARGC1A,PRKAR1B,PTGES
Airway Pathology in Chronic Obstructive Pulmonary Disease	1.68		0.102	CCL2,CXCL3,IL12B,IL18,IL36B,LCN2,MMP9,ORM1,OSM,TNFSF13,TNFSF8,Tnfsf9
MSP-RON Signaling In Macrophages Pathway	1.66	-0.301511	0.101	ARG1,HLA-DQA1,HLA-DQB1,HLA-DRA,HLA-DRB5,IL12B,ITGAM,ITGB2,KLK13,RASD2,RT1-DMa,RT1-DMb
Stearate Biosynthesis I (Animals)	1.63	0.816497	0.119	ACSBG1,AKR1B10,Akr1c19,CYP2E1,CYP4A22,PPT1,TBXAS1,THEM5
Paxillin Signaling	1.61	-0.816497	0.103	ACTA1,ACTC1,ACTG1,ACTN2,ITGAM,ITGAX,ITGB2,ITGB8,MAPK10,RASD2,TLN2
Remodeling of Epithelial Adherens Junctions	1.6		0.118	ACTA1,ACTC1,ACTG1,ACTN2,TUBA1C,TUBB2B,TUBB3,TUBB4A
α-Adrenergic Signaling	1.59	-1	0.102	ADCY1,ADCY5,ADRA1A,ADRA2A,CAMK4,GNAO1,GNAT2,GNAZ,PRKAR1B,PRKCG,RASD2
SNARE Signaling Pathway	1.58	-1.38675	0.0956	ADCY1,ADCY5,CACNB4,CAMK2A,CAMK4,MYH11,MYH4,MYL2,PRKAR1B,SNAP91,SNCG,SYT13,SYT6
Role of Macrophages, Fibroblasts and Endothelial Cells in Rheumatoid Arthritis	1.57		0.0783	C5AR1,CAMK2A,CAMK4,CCL2,FCGR1A,FRZB,GNAO1,IL18,IL1R2,IL1RL1,IL1RN,IL36B,NFKBIE,OSM,PLCE1,PRKCG,RASD2,SFRP5,TLR1,Tlr11,Tlr12,Tlr13,TLR2,WNT10A,WNT2B,WNT7B
IL-15 Production	1.56	0.57735	0.0976	BTK,CSF2RA,ERBB4,FGFR4,HCK,ITK,MATK,NTRK1,NTRK2,PTK6,TEC,TEK
NAD biosynthesis II (from tryptophan)	1.56		0.231	KMO,NMNAT2,QPRT
UDP-N-acetyl-D-galactosamine Biosynthesis II	1.56		0.231	GNPDA1,HK2,HK3
Reelin Signaling in Neurons	1.54	-0.707107	0.0942	APOE,ARHGEF37,CAMK2A,DNAH1,DNAH3,DNALI1,GRIN2C,GRIN2D,GRIN3A,HCK,MAP1B,MAPK10,MAPT
Estrogen Biosynthesis	1.54	-0.447214	0.133	AKR1B10,CYP2D6,CYP2E1,CYP2F1,CYP4B1,HSD17B1
Serotonin Receptor Signaling	1.54		0.133	ADCY1,ADCY5,DDC,GCH1,HTR2B,TPH1
Differential Regulation of Cytokine Production in Intestinal Epithelial Cells by IL-17A and IL-17F	1.53	2	0.174	CCL2,CCL4,IL12B,LCN2
Pyrimidine Deoxyribonucleotides De Novo Biosynthesis I	1.53	0	0.174	AK4,AK7,AK9,RRM2
Vitamin-C Transport	1.53	2	0.174	GLRX,SLC2A1,STOM,TXNRD3
Salvage Pathways of Pyrimidine Ribonucleotides	1.52	0.333333	0.103	AK4,AK7,AK9,APOBEC1,CDK1,DMPK,MAK,PIM1,PLK1,TTK
Chondroitin Sulfate Biosynthesis	1.51	-0.377964	0.121	CHST1,CHST15,CHST3,HS3ST3B1,HS6ST2,NDST2,XYLT1
Inhibition of Angiogenesis by TSP1	1.51	0	0.147	GUCY1A2,MAPK10,MMP9,TGFBR1,THBS1
Pancreatic Adenocarcinoma Signaling	1.49	0.816497	0.0952	CCNE1,CDKN2A,CYP2E1,E2F3,E2F8,HDAC9,HMOX1,MAPK10,MMP9,PLD3,RAD51,TGFBR1
Dermatan Sulfate Biosynthesis (Late Stages)	1.46	-0.816497	0.128	CHST1,CHST15,CHST3,HS3ST3B1,HS6ST2,NDST2
nNOS Signaling in Neurons	1.46	-0.447214	0.128	CAMK2A,CAMK4,GRIN2C,GRIN2D,GRIN3A,PRKCG
Role of Hypercytokinemia/hyperchemokinemia in the Pathogenesis of Influenza	1.45	3	0.105	AREG,CCL2,CCL4,CXCL10,CXCL3,IL12B,IL18,IL1RN,IL36B
Arginine Degradation VI (Arginase 2 Pathway)	1.45		0.333	ARG1,PYCR1
Glycerol Degradation I	1.45		0.333	Gk,GK5
Serotonin and Melatonin Biosynthesis	1.45		0.333	DDC,TPH1
ID1 Signaling Pathway	1.45	-1.21268	0.0846	ACVR1C,ATF3,BCL3,BHLHA15,Bhlhe41,CAV1,CCNE1,CDKN2A,CHRNA4,FGFR4,HCK,IGF2,MMP9,RASD2,S100A9,TGFBR1,TGFBR3
IL-17 Signaling	1.44	3	0.0856	CCL11,CCL17,CCL2,CCL22,CXCL3,IL12B,IL18,IL36B,LCN2,MAPK10,MMP9,OSM,RASD2,TNFSF13,TNFSF8,Tnfsf9
Pulmonary Fibrosis Idiopathic Signaling Pathway	1.44	1.52753	0.0767	ACTA1,ACTC1,ACTG1,ACVR1C,AREG,CAV1,COL16A1,COL23A1,Col6a4,FGFR4,MAPK10,MMP12,MMP14,MMP19,MMP7,MMP9,PLAU,RASD2,SERPINE1,TGFBR1,TGFBR3,THBS1,WNT10A,WNT2B,WNT7B
Glioma Invasiveness Signaling	1.44	1.63299	0.11	CD44,MMP9,PLAU,PLAUR,RASD2,RND1,TIMP1,TIMP4
Dermatan Sulfate Biosynthesis	1.44	-0.377964	0.117	CHST1,CHST15,CHST3,HS3ST3B1,HS6ST2,NDST2,XYLT1
GADD45 Signaling	1.44	-1.13389	0.117	ACVR1C,CCNB1,CCNE1,CDK1,GADD45G,MAPK10,TGFBR1
G Beta Gamma Signaling	1.42	-1.50756	0.093	ADCY1,BTK,CACNA1D,CACNA1H,CACNB4,CAV1,GNAO1,GNAT2,GNAZ,PRKAR1B,PRKCG,RASD2
Bupropion Degradation	1.41	-1	0.16	CYP2D6,CYP2E1,CYP2F1,CYP4B1
Caveolar-mediated Endocytosis Signaling	1.38		0.107	ACTA1,ACTC1,ACTG1,CAV1,ITGAM,ITGAX,ITGB2,ITGB8
Signaling by Rho Family GTPases	1.38	0	0.0787	ACTA1,ACTC1,ACTG1,CDH17,CDH19,CDH4,CDH9,CYBB,DIAPH3,GNAO1,GNAT2,GNAZ,ITGAM,ITGAX,ITGB2,ITGB8,MAPK10,MYL2,NCF1,PIP5K1B,RND1
Circadian Rhythm Signaling	1.37		0.0784	ADCY1,ADCY5,CACNA1D,CACNA1H,CACNB4,CAMK2A,CTH,GRIA1,GRIN2C,GRIN2D,GRIN3A,GUCY1A2,HCK,NPR3,NTRK2,PLCE1,PRKAR1B,PRKCG,RASD2,RORB,RYR2
Chondroitin Sulfate Biosynthesis (Late Stages)	1.34	-0.816497	0.12	CHST1,CHST15,CHST3,HS3ST3B1,HS6ST2,NDST2
FAT10 Cancer Signaling Pathway	1.34	-0.447214	0.12	ACVR1C,MAD2L1,NFKBIE,TGFBR1,TGFBR3,UBD
Ceramide Degradation	1.32		0.286	ACER2,NAAA
NAD Biosynthesis from 2-amino-3-carboxymuconate Semialdehyde	1.32		0.286	NMNAT2,QPRT
Trehalose Degradation II (Trehalase)	1.32		0.286	HK2,HK3
Chondroitin Sulfate Degradation (Metazoa)	1.32		0.188	CEMIP,GM2A,HEXA
Role of MAPK Signaling in Inhibiting the Pathogenesis of Influenza	1.32	1.41421	0.104	CCL2,CXCL10,MAPK10,NFKBIE,PLA2G1B,PLA2G2A,PLA2G4E,PLA2G7

## Sheet: Table S4c Pathways (Y-2)
Table S4. All significantly perturbed canonical pathways at each time point
Table S4c. All significantly perturbed canonical pathways at Year 2
Ingenuity Canonical Pathways	-log(p-value)	z-score	Ratio	Molecules
Phagosome Formation	18.8	3.25767	0.188	ACKR4,ADGRE1,ADGRF5,ADGRG1,ADGRL1,ADGRL3,ADGRL4,ADGRV1,ADORA1,ADORA2B,Adora3/LOC100911796,ADRA1A,ADRB1,AGTR2,APLNR,BRS3,C3,C3AR1,C5AR1,CALCRL,CARD9,CCR1,CCR3,CCR5,CCR8,CD14,Chrm2,CHRM4,CLEC4D,CLEC4E,CLEC7A,CNR2,CR2,CYSLTR1,FCAMR,FCER1A,FCER2,FCGR1A,FCGR2A,FCGR2B,FN1,FZD8,GALR3,GCGR,GPR157,GPR158,GPR161,GPR179,GPR182,GPR183,GPR34,GPR4,GPR50,GPR68,GPR88,HCK,HMOX1,HRH4,HTR2B,IGHE,ITGAV,ITGAX,ITGB2,I…
G-Protein Coupled Receptor Signaling	13.7	-0.641689	0.169	ACKR4,ADCY5,ADGRE1,ADGRF5,ADGRG1,ADGRL1,ADGRL3,ADGRL4,ADGRV1,ADORA1,ADORA2B,Adora3/LOC100911796,ADRA1A,ADRB1,AGTR2,APLNR,BRS3,C3AR1,C5AR1,CALCRL,CAMK2A,CAMK4,CARD10,CCR1,CCR3,CCR5,CCR8,Chrm2,CHRM4,CNR2,CYSLTR1,DUSP4,DUSP9,ENPP6,FZD8,GALR3,GCGR,GNA14,GNA15,GNAI1,GNAL,GNAT2,GNG13,GNG2,GPR157,GPR158,GPR161,GPR179,GPR182,GPR183,GPR34,GPR4,GPR50,GPR68,GPR88,GRK3,GRK5,GUCY1A1,HCN4,HRH4,HTR2B,KCNH2,KCNN…
CREB Signaling in Neurons	13.6	0	0.177	ACKR4,ADCY5,ADGRE1,ADGRF5,ADGRG1,ADGRL1,ADGRL3,ADGRL4,ADGRV1,ADORA1,ADORA2B,Adora3/LOC100911796,ADRA1A,ADRB1,AGTR2,APLNR,BMP6,BMPR2,BRS3,C3AR1,C5AR1,CACNA1D,CACNA2D2,CACNB2,CACNB4,CALCRL,CAMK2A,CAMK4,CCR1,CCR3,CCR5,CCR8,Chrm2,CHRM4,CNR2,CYSLTR1,EGF,FGFR4,FZD8,GALR3,GCGR,GNA14,GNA15,GNAI1,GNAL,GNAT2,GNG13,GNG2,GPR157,GPR158,GPR161,GPR179,GPR182,GPR183,GPR34,GPR4,GPR50,GPR68,GPR88,GRIA1,GRIA2,GRIN2…
Complement System	12.2	0.774597	0.541	C1QA,C1QB,C1QC,C1S,C2,C3,C3AR1,C4A/C4B,C4BPA,C4BPB,C5AR1,C6,CFB,CFD,CFH,CFI,CR2,ITGAX,ITGB2,SERPING1
Hepatic Fibrosis / Hepatic Stellate Cell Activation	12.2		0.253	A2M,BAMBI,CCL2,CCL21,CCL5,CCR5,CD14,CD40LG,COL13A1,COL16A1,COL19A1,COL1A1,COL27A1,COL4A3,Col6a4,COL8A1,COL9A2,CSF1,CXCL3,CYP2E1,EGF,FASLG,Flt1,FN1,IGF1,IGF2,IGFBP3,IGFBP4,IGFBP5,IL1R2,IL1RL1,IL4R,KDR,LAMA1,LBP,LEPR,MET,MMP9,MYH11,MYH7,MYH7B,MYL2,PDGFA,SERPINE1,TGFB1,TGFBR1,TIMP1,VEGFA,VEGFD
Agranulocyte Adhesion and Diapedesis	11.6		0.238	ACKR4,ACTA1,ACTC1,ACTG2,AOC3,C5AR1,CCL1,CCL11,Ccl2,CCL2,CCL21,CCL22,CCL3L3,CCL5,Ccl7,Ccl9,CCR1,CCR3,CCR5,CCR8,CDH5,CLDN10,CLDN4,CLDN5,CLDN6,CX3CL1,CXCL14,CXCL2,Cxcl3,CXCL3,CXCL6,FN1,GNAI1,ICAM2,IL18,IL1RN,IL33,IL36B,ITGB2,MMP12,MMP14,MMP19,MMP7,MMP9,MYH11,MYH7,MYH7B,MYL2,PF4,Podxl,SELPLG
Atherosclerosis Signaling	11.6		0.29	ALOX12,ALOX15,ALOXE3,APOE,CCL11,CCL2,CCR3,CD40LG,CMA1,COL1A1,CSF1,F3,IL18,IL1RN,IL33,IL36B,ITGB2,LPL,LYZ,MMP9,MSR1,ORM1,PCYOX1,PDGFA,PLA2G1B,PLA2G2A,PLA2G2F,PLA2G4A,PLA2G4E,PLA2G7,RBP4,S100A8,SELPLG,SERPINA1,TGFB1,TNFRSF12A,TNFRSF14,TPSAB1/TPSB2
Breast Cancer Regulation by Stathmin1	11.5	-0.301511	0.168	ACKR4,ADGRE1,ADGRF5,ADGRG1,ADGRL1,ADGRL3,ADGRL4,ADGRV1,ADORA1,ADORA2B,Adora3/LOC100911796,ADRA1A,ADRB1,AGTR2,APLNR,ARHGEF10,ARHGEF15,ARHGEF18,BMP6,BRS3,C3AR1,C5AR1,CALCRL,CAMK2A,CAMK4,CCR1,CCR3,CCR5,CCR8,CDK1,Chrm2,CHRM4,CNR2,CYSLTR1,EGF,FZD8,GALR3,GCGR,GNG13,GNG2,GPR157,GPR158,GPR161,GPR179,GPR182,GPR183,GPR34,GPR4,GPR50,GPR68,GPR88,HRH4,HTR2B,IGF1,LPAR3,MC2R,MC5R,MMP9,Npy4r,P2RY1,P2RY12,P2RY2,P…
Axonal Guidance Signaling	10.8		0.173	ABLIM2,ABLIM3,ACE,ADAM11,ADAMTS17,ADAMTS18,ADAMTS2,ADAMTS4,ADAMTS5,ARHGEF15,BAIAP2,BMP15,BMP6,Bmp8b,ECE2,EFNB1,EFNB2,EGF,EPHA7,EPHA8,EPHB4,FZD8,GLIS1,GNA14,GNA15,GNAI1,GNAL,GNAT2,GNG13,GNG2,HHIP,IGF1,ITGAV,ITGAX,ITGB2,ITGB6,ITGB8,KCNJ12,LINGO1,MET,MMP12,MMP14,MMP7,MMP9,MYL2,NCK2,NTN1,NTRK2,PAPPA,PAPPA2,PDGFA,PIK3R5,PLCB2,PLCB4,PLCE1,PLCH2,PLXNB2,PLXNC1,PRKAR1B,PRKCE,PRKCG,RAP2B,RASD1,RASD2,RGS3,S…
Th1 and Th2 Activation Pathway	10.6		0.25	ACVR1C,BMPR2,CCR1,CCR3,CCR5,CCR8,CD247,CD3D,CD3E,CD3G,CD4,CD40LG,CD80,CD86,CD8A,CRLF2,DLL1,DLL4,GATA3,HAVCR2,HLA-DQA1,HLA-DQB1,HLA-DRA,HLA-DRB5,IL12RB1,IL18,IL1RL1,IL24,IL33,IL4R,ITGB2,KLRD1,LOC100909593/RT1-DMa,LOC100909630/RT1-DMb,MAP2K6,NOTCH4,PIK3R5,S1PR1,SPI1,TGFB1,TGFBR1,TGFBR3,VAV1
Granulocyte Adhesion and Diapedesis	10.3		0.238	ACKR4,C5AR1,CCL1,CCL11,Ccl2,CCL2,CCL21,CCL22,CCL3L3,CCL5,Ccl7,Ccl9,CCR1,CCR3,CCR5,CCR8,CDH5,CLDN10,CLDN4,CLDN5,CLDN6,CX3CL1,CXCL14,CXCL2,Cxcl3,CXCL3,CXCL6,GNAI1,HRH4,ICAM2,IL18,IL1R2,IL1RL1,IL1RN,IL33,IL36B,ITGB2,MMP12,MMP14,MMP19,MMP7,MMP9,PF4,SELPLG,THY1
Th2 Pathway	9.65	0	0.263	ACVR1C,BMPR2,CCR1,CCR3,CCR5,CCR8,CD247,CD3D,CD3E,CD3G,CD4,CD80,CD86,CRLF2,DLL1,GATA3,HLA-DQA1,HLA-DQB1,HLA-DRA,HLA-DRB5,IL12RB1,IL1RL1,IL24,IL33,IL4R,ITGB2,LOC100909593/RT1-DMa,LOC100909630/RT1-DMb,NOTCH4,PIK3R5,S1PR1,SPI1,TGFB1,TGFBR1,TGFBR3,VAV1
Cardiac Hypertrophy Signaling (Enhanced)	9.34	-2.60473	0.162	ACE,ACVR1C,ADCY5,ADRA1A,ADRB1,ATP2A3,BMPR2,CACNA1D,CACNA2D2,CACNB2,CACNB4,CAMK2A,CAMK4,CD40LG,CLCF1,CSF2RB,CYBB,DIAPH3,ENPP6,FASLG,FGF18,FGF9,FGFR4,FZD8,GATA4,GNA14,GNA15,GNAI1,GNG13,GNG2,GUCY1A1,HDAC9,HSPB2,HSPB7,IGF1,IL12RB1,IL15,Il17d,IL18,IL1R2,IL1RL1,IL33,IL36B,IL4R,ITGAV,ITGAX,ITGB2,ITGB6,ITGB8,MAP2K6,MAPK10,MAPK12,MAPK7,MPPED2,MYC,MYOCD,OSM,PDE10A,PDE1B,PDE2A,PDE3A,PDE8B,PDE9A,PIK3R5,PLCB2…
Wound Healing Signaling Pathway	9.34	0.27735	0.206	ACVR1C,BMPR2,CCL5,CD40LG,CLCF1,CMA1,COL13A1,COL16A1,COL19A1,COL1A1,COL27A1,COL4A3,Col6a4,COL8A1,COL9A2,EGF,FASLG,FN1,IL15,Il17d,IL18,IL1R2,IL1RL1,IL1RN,IL33,IL36B,KRT17,LAMA1,MAP2K6,MAPK10,MAPK12,Mcpt4,MMP9,MST1,OSM,PDGFA,PF4,RAP2B,RASD1,RASD2,TAC1,TGFB1,TGFBR1,TGFBR3,TNFSF10,TNFSF13,TNFSF8,Tnfsf9,TPSAB1/TPSB2,TRPA1,VEGFA,VEGFD
Neuroinflammation Signaling Pathway	9.1	0.961524	0.189	ACVR1C,BACE2,BMPR2,CCL2,CCL5,CD200R1,CD80,CD86,CX3CL1,CYBB,FASLG,GABRA1,GABRA4,GABRR1,GABRR2,GJB1,GRIA1,GRIN2C,GRIN2D,GRIN3A,GRIN3B,HLA-DQA1,HLA-DQB1,HLA-DRA,HLA-DRB5,HMOX1,IL18,KCNJ3,KCNJ5,LOC100909593/RT1-DMa,LOC100909630/RT1-DMb,MAPK10,MAPK12,MAPK15,MAPK7,MAPT,MMP9,NCF1,PIK3R5,PLA2G1B,PLA2G2A,PLA2G2F,PLA2G4A,PLA2G4E,PRKCG,S100B,SLC6A12,SOD2,SYK,TGFB1,TGFBR1,TGFBR3,TICAM2,TLR1,TLR2,TLR5,TLR6,TL…
Neurovascular Coupling Signaling Pathway	8.69	0.729325	0.209	ADORA1,ADORA2B,CACNA1D,CACNA2D2,CACNB2,CACNB4,CAMK4,Chrm2,CHRM4,CTH,ENTPD3,GABRA1,GABRA4,GABRR1,GABRR2,GJA1,GRIA1,GRIA2,GRIN2C,GRIN2D,GRIN3A,GRIN3B,GUCY1A1,Gucy2g,KCNJ12,KCNJ3,KCNJ5,KCNMB4,KCNN4,MAPT,MPRIP,NPR3,P2RX1,P2RY1,PLA2G1B,PLA2G2A,PLA2G2F,PLA2G4A,PLA2G4E,PLA2G7,PLCB2,PLCB4,PRKAR1B,RYR3,SLC16A1,TBXA2R,TRPC3
Sperm Motility	8.22	0.229416	0.196	AATK,BTK,CAMK4,CSF2RA,EPHA8,EPHB4,ERBB4,FGFR4,Flt1,FRK,GNA14,GNA15,GNAI1,GNAL,GNAT2,GNG13,GNG2,GUCY1A1,HCK,ITK,KDR,KIT,LCK,MAP2K6,MATK,MERTK,MET,NTRK2,PDE1B,PDE2A,PLA2G1B,PLA2G2A,PLA2G2F,PLA2G4A,PLA2G4E,PLA2G7,PLCB2,PLCB4,PLCE1,PLCH2,PRKAR1B,PRKCE,PRKCG,PTK6,ROS1,STYK1,SYK,TEC,TEK,ZAP70
Role of Pattern Recognition Receptors in Recognition of Bacteria and Viruses	8	1.69775	0.231	C1QA,C1QB,C1QC,C3,C3AR1,C5AR1,CCL5,CD40LG,CLCF1,CLEC7A,FASLG,IL15,Il17d,IL18,IL33,IL36B,MAPK10,MAPK12,OSM,PIK3R5,PRKCE,PRKCG,PTX3,SYK,TGFB1,TLR1,TLR2,TLR5,TLR6,TLR7,TLR8,TLR9,TNFSF10,TNFSF13,TNFSF8,Tnfsf9
Acute Phase Response Signaling	7.94	3.26599	0.216	A2M,C1QA,C1QB,C1QC,C1S,C2,C3,C4A/C4B,C4BPA,C4BPB,CFB,CP,FGG,FN1,FTL,HMOX1,HNF1A,HP,HPX,IL18,IL1RN,IL33,IL36B,LBP,MAP2K6,MAPK12,ORM1,OSM,OSMR,RAP2B,RASD1,RASD2,RBP4,SERPINA1,SERPINA3,SERPINE1,SERPINF1,SERPING1,SOD2,TF
cAMP-mediated signaling	7.6	-1.58114	0.196	ADCY5,ADORA1,ADORA2B,ADRB1,AGTR2,AKAP12,AKAP14,AKAP5,AKAP6,APLNR,CAMK2A,CAMK4,CHRM4,CNR2,DUSP4,DUSP9,ENPP6,GNAI1,GNAL,GUCY1A1,MC2R,MC5R,MPPED2,NPR3,P2RY12,PDE10A,PDE1B,PDE2A,PDE3A,PDE8B,PDE9A,PKIB,PRKAR1B,PTGER2,RAPGEF4,RGS10,RGS12,RGS18,RGS7,S1PR1,S1PR3,SMPDL3A,SMPDL3B,TBXA2R,VIPR2,XCR1
Adrenomedullin signaling pathway	7.49	-1	0.206	ADCY5,C3,CALCRL,CAMK4,CFH,CTH,GNA14,GNA15,GPR182,GUCY1A1,Gucy2g,IL18,IL1RN,IL33,IL36B,KCNH2,KCNN4,MAP2K6,MAPK10,MAPK12,MAPK15,MAPK7,MATK,MYLK2,MYLK3,NPR3,PIK3R5,PLCB2,PLCB4,PLCE1,PLCH2,PPARG,PRKAR1B,RAMP2,RAMP3,RAP2B,RASD1,RASD2,RXRG,SHE,TFAP2C
CLEAR Signaling Pathway	7.43	0.5547	0.182	ATP6AP2,ATP6V0C,ATP6V0D2,ATP6V1A,ATP6V1B2,BMP6,BMPR2,CD63,CLCN7,CTSA,CTSB,CTSD,EGF,FGFR4,GAA,GLA,GLB1,GNS,GUSB,HEXA,IFI30,IGF1,KDR,MAPK12,MAPK15,MAPK7,MITF,NAGLU,NTRK2,PRKCE,PRKCG,PSAP,RAP2B,RASD1,RASD2,RRAGC,SCPEP1,SFN,SLC36A1,TCIRG1,TGFB1,TGFBR1,TGFBR3,TLR1,TLR2,TLR5,TLR6,TLR7,TLR8,TLR9,TPP1,VEGFA
Cardiac β-adrenergic Signaling	6.93	-0.942809	0.208	ADCY5,ADRB1,AKAP12,AKAP14,AKAP5,AKAP6,ATP2A3,CACNA1D,CACNA2D2,CACNB2,CACNB4,ENPP6,GNA14,GNA15,GNAI1,GNAL,GNAT2,GNG13,GNG2,GRK3,GUCY1A1,MPPED2,PDE10A,PDE1B,PDE2A,PDE3A,PDE8B,PDE9A,PKIB,PPP1R14A,PPP1R3A,PPP1R3C,PRKAR1B,SLC8A1,SLC8A3,SMPDL3A,SMPDL3B
Hepatic Fibrosis Signaling Pathway	6.59	-0.662266	0.157	ACVR1C,BAMBI,BMPR2,CACNA1D,CACNA2D2,CACNB2,CACNB4,CAMK4,CCL2,CCL5,CD40LG,COL1A1,CYBB,Flt1,FTL,FZD8,GLIS1,GNAI1,HNF1A,IL18,IL1R2,IL1RL1,IL1RN,IL33,IL36B,ITGAV,ITGAX,ITGB2,ITGB6,ITGB8,KDR,LEPR,MAP2K6,MAPK10,MAPK12,MYC,MYL2,MYLK2,MYLK3,NCF1,PDGFA,PIK3R5,PPARG,PRKAR1B,PRKCE,PRKCG,RAP2B,RASD1,RASD2,Rhou,SERPINE1,SHH,SOD2,SPP1,Tcf7,TF,TGFB1,TGFBR1,TGFBR3,TIMP1,VEGFA,VEGFD,WNT2B,WNT4,WNT7A,WNT7B
Th1 Pathway	6.32	0.625543	0.23	CCR5,CD247,CD3D,CD3E,CD3G,CD4,CD40LG,CD80,CD86,CD8A,DLL1,DLL4,GATA3,HAVCR2,HLA-DQA1,HLA-DQB1,HLA-DRA,HLA-DRB5,IL12RB1,IL18,ITGB2,KLRD1,LOC100909593/RT1-DMa,LOC100909630/RT1-DMb,MAP2K6,NOTCH4,PIK3R5,VAV1
Pulmonary Fibrosis Idiopathic Signaling Pathway	6.27	0	0.166	ACTA1,ACTC1,ACTG2,ACVR1C,AREG,BMPR2,CAV1,CCN4,CDH2,COL13A1,COL16A1,COL19A1,COL1A1,COL27A1,COL4A3,Col6a4,COL8A1,COL9A2,EFNB2,EPHB4,FGF18,FGF9,FGFR4,FN1,FZD8,HNF1A,ITGAV,ITGB6,MAP2K6,MAPK10,MAPK12,MMP12,MMP14,MMP19,MMP7,MMP9,NOTCH4,PDGFA,PIK3R5,PLAU,RAP2B,RASD1,RASD2,SERPINE1,SFTPC,Tcf7,TGFB1,TGFBR1,TGFBR3,THBS1,WNT2B,WNT4,WNT7A,WNT7B
LXR/RXR Activation	6.24	-1.22474	0.228	ABCA1,APOE,C3,C4A/C4B,CCL2,CD14,FASN,HPX,IL18,IL1R2,IL1RL1,IL1RN,IL33,IL36B,LBP,LPL,LYZ,MMP9,MSR1,ORM1,PCYOX1,RBP4,RXRG,S100A8,SCD,SERPINA1,SERPINF1,TF
Hepatic Cholestasis	6.13		0.194	ABCB11,ADCY5,ATP8B1,CD14,CD40LG,CLCF1,CYP27A1,ESR1,FASLG,FGFR4,GCGR,GUCY1A1,HNF1A,IL15,Il17d,IL18,IL1R2,IL1RL1,IL1RN,IL33,IL36B,LBP,MAP4K2,MAPK10,MAPK12,NR5A2,OSM,PRKAR1B,PRKCE,PRKCG,SLCO1A2,SLCO3A1,TGFB1,TNFSF10,TNFSF13,TNFSF8,Tnfsf9
Opioid Signaling Pathway	6.08	-1.58114	0.171	ADCY5,CACNA1D,CACNA2D2,CACNB2,CACNB4,CAMK2A,CAMK4,FRK,GNA14,GNA15,GNAI1,GNAL,GNAT2,GNG13,GNG2,GRIN2C,GRIN2D,GRIN3A,GRIN3B,GRK3,GRK5,GUCY1A1,HCK,HNF1A,KCNJ3,KCNJ5,LCK,MAP2K6,MAPK12,MAPK15,MAPK7,MYC,PDE1B,PRKAR1B,PRKCE,PRKCG,RAP2B,RASD1,RASD2,RGS1,RGS10,RGS12,RGS18,RGS3,RGS6,RGS7,RGS9,RYR3
Leukocyte Extravasation Signaling	6.02	1.09545	0.192	ACTA1,ACTC1,ACTG2,ACTN2,BTK,CD44,CDH5,CLDN10,CLDN4,CLDN5,CLDN6,CYBA,CYBB,DLC1,EDIL3,GNAI1,ITGB2,ITK,JAM2,MAPK10,MAPK12,MMP12,MMP14,MMP19,MMP7,MMP9,NCF1,NCF4,PIK3R5,PRKCE,PRKCG,RAPGEF4,SELPLG,TEC,THY1,TIMP1,VAV1
Endocannabinoid Neuronal Synapse Pathway	5.93	-1.51186	0.208	ADCY5,CACNA1D,CACNA2D2,CACNB2,CACNB4,CNR2,DNALI1,GNA14,GNA15,GNAI1,GNAL,GNG13,GNG2,GRIA1,GRIA2,GRIN2C,GRIN2D,GRIN3A,GRIN3B,GUCY1A1,KCNJ3,KCNJ5,MAPK10,MAPK12,MAPK15,MAPK7,PLCB2,PLCB4,PLCE1,PLCH2,PRKAR1B
Gap Junction Signaling	5.74		0.187	ACTA1,ACTC1,ACTG2,ADCY5,ADRB1,CAV1,CTH,EGF,GJA1,GJA3,GJB1,GJB6,GNAI1,GRIA1,GRIA2,GUCY1A1,Gucy2g,HTR2B,MAPK7,NPR3,PIK3R5,PLCB2,PLCB4,PLCE1,PLCH2,PRKAR1B,PRKCE,PRKCG,RAP2B,RASD1,RASD2,TUBA1C,TUBB1,TUBB2B,TUBB3,TUBB4A,TUBB6
IL-15 Production	5.72	-0.57735	0.22	AATK,BTK,CSF2RA,EPHA8,EPHB4,ERBB4,FGFR4,Flt1,FRK,HCK,IL15,ITK,KDR,KIT,LCK,MAP2K6,MATK,MERTK,MET,NTRK2,PTK6,ROS1,STYK1,SYK,TEC,TEK,ZAP70
ID1 Signaling Pathway	5.63	-0.821995	0.185	ACVR1C,ACVRL1,ATF3,BHLHA15,BHLHE40,Bhlhe41,BMPR2,CAV1,CCNE1,CDKN1A,CHRNA10,CHRNA4,EGF,FGFR4,FN1,FRK,HCK,IGF2,KIF11,LCK,LIFR,MAPK12,MMP9,MYC,PIK3R5,PLAC8,PLXNB2,RAP2B,RASD1,RASD2,S100A9,SHH,TGFB1,TGFBR1,TGFBR3,VEGFA,VEGFD
Synaptogenesis Signaling Pathway	5.58	-0.447214	0.161	ADCY5,APOE,CACNA2D2,CACNB2,CACNB4,CAMK2A,CAMK4,CDH17,CDH2,CDH23,CDH4,CDH5,CDH9,EFNB1,EFNB2,EPHA7,EPHA8,EPHB4,GRIA1,GRIA2,GRIN2C,GRIN2D,GRIN3A,GRIN3B,GUCY1A1,HCK,LCK,MAPT,NRXN2,NTRK2,PIK3R5,PRKAR1B,PRKCE,RAP2B,RASD1,RASD2,RASGRF1,RASGRP2,SHE,SNAP25,SNCG,STXBP6,SYT1,SYT13,SYT17,SYT5,SYT8,THBS1,THBS2,TIAM1,UNC13A
TREM1 Signaling	5.57	4.02492	0.26	CCL2,CD83,CD86,CIITA,CXCL3,FCGR2B,IL18,IL1RL1,ITGAX,LAT2,NLRC3,NLRP6,TLR1,TLR2,TLR5,TLR6,TLR7,TLR8,TLR9,TREM1
Protein Kinase A Signaling	5.42	0.884652	0.149	ADCY5,ADD2,AKAP12,AKAP14,AKAP5,AKAP6,CAMK2A,CAMK4,CDC25B,Cdkn3,DUSP26,DUSP4,DUSP8,DUSP9,EBI3,ENPP6,GNAI1,GNG13,GNG2,GUCY1A1,HNF1A,IHH,MPPED2,MYL2,MYLK2,MYLK3,NTN1,PDE10A,PDE1B,PDE2A,PDE3A,PDE8B,PDE9A,PLCB2,PLCB4,PLCE1,PLCH2,PPP1R14A,PPP1R3A,PPP1R3C,PRKAR1B,PRKCE,PRKCG,Ptpn14,PTPN22,PTPRB,PTPRN,PTPRO,PTPRR,PTPRU,PYGM,RYR3,SFN,SHH,SMPDL3A,SMPDL3B,Tcf7,TGFB1,TGFBR1,TNNI3,TNS2
Human Embryonic Stem Cell Pluripotency	5.35		0.193	BMP15,BMP6,Bmp8b,BMPR2,FGFR4,FZD8,GNA14,GNA15,GNAI1,GNAL,GNAT2,GNG13,GNG2,HNF1A,INHBA,NOG,NTRK2,PDGFA,PIK3R5,S1PR1,S1PR3,S1PR4,S1PR5,SMAD6,SOX2,Tcf7,TGFB1,TGFBR1,WNT2B,WNT4,WNT7A,WNT7B
Phagosome Maturation	5.31		0.195	ATP6AP2,ATP6V0C,ATP6V0D2,ATP6V1A,ATP6V1B2,CTSA,CTSB,CTSC,CTSD,CTSH,CTSK,CTSS,CTSW,CTSZ,CYBB,DYNLRB2,HLA-DRA,HLA-DRB5,LAMP2,LPO,NCF1,PRDX5,RAB7B,SNAP25,TCIRG1,TUBA1C,TUBB1,TUBB2B,TUBB3,TUBB4A,TUBB6
Factors Promoting Cardiogenesis in Vertebrates	5.21	-3.28634	0.196	ACVR1C,BMP15,BMP6,Bmp8b,BMPR2,CAMK2A,FZD8,GATA4,HNF1A,MAPK10,MAPK12,MYC,MYH7,MYL2,MYOCD,NOG,PLCB2,PLCB4,PLCE1,PLCH2,PRKCE,PRKCG,Tcf7,TGFB1,TGFBR1,TGFBR3,WNT2B,WNT4,WNT7A,WNT7B
Role of Macrophages, Fibroblasts and Endothelial Cells in Rheumatoid Arthritis	5.14		0.155	ADAMTS4,C5AR1,CAMK2A,CAMK4,CCL2,CCL5,CEBPA,CSF1,DKK2,FCGR1A,FN1,FRZB,FZD8,HNF1A,IL15,IL18,IL1R2,IL1RL1,IL1RN,IL33,IL36B,MAP2K6,MYC,OSM,PDGFA,PIK3R5,PLCB2,PLCB4,PLCE1,PLCH2,PRKCE,PRKCG,RAP2B,RASD1,RASD2,SFRP5,Tcf7,TGFB1,TLR1,TLR2,TLR5,TLR6,TLR7,TLR8,TLR9,VEGFA,VEGFD,WNT2B,WNT4,WNT7A,WNT7B
Gαi Signaling	5.07	0.688247	0.2	ADCY5,ADORA1,AGTR2,APLNR,CAV1,CHRM4,CNR2,GNA14,GNA15,GNAI1,GNAL,GNAT2,GNG13,GNG2,GUCY1A1,NPR3,P2RY12,PRKAR1B,RAP2B,RASD1,RASD2,RGS10,RGS12,RGS7,S1PR1,S1PR3,TBXA2R,XCR1
Tumor Microenvironment Pathway	5.06	2.61116	0.184	ARG1,CCL2,CD44,COL1A1,CSF1,EGF,FASLG,FGF18,FGF9,FN1,IGF1,IGF2,LEPR,MMP12,MMP14,MMP19,MMP7,MMP9,MYC,OSM,PDGFA,PIK3R5,PLAU,RAP2B,RASD1,RASD2,SLC16A1,SLC2A1,SPP1,TGFB1,TIAM1,VEGFA,VEGFD
FXR/RXR Activation	5.01		0.206	ABCB11,APOE,C3,C4A/C4B,CYP27A1,FASN,FBP1,FETUB,FGFR4,HNF1A,HPX,IL18,IL1RN,IL33,IL36B,LPL,MAPK10,MAPK12,NR5A2,ORM1,PCYOX1,PPARG,RBP4,SERPINA1,SERPINF1,TF
Colorectal Cancer Metastasis Signaling	5	1.25724	0.162	ADCY5,EGF,FZD8,GNA14,GNA15,GNAI1,GNAL,GNAT2,GNG13,GNG2,GRK3,GUCY1A1,HNF1A,MAPK10,MAPK12,MMP12,MMP14,MMP19,MMP7,MMP9,MYC,PIK3R5,PRKAR1B,PTGER2,RAP2B,RASD1,RASD2,Rhou,Tcf7,TGFB1,TGFBR1,TLR1,TLR2,TLR5,TLR6,TLR7,TLR8,TLR9,VEGFA,VEGFD,WNT2B,WNT4,WNT7A,WNT7B
WNT/β-catenin Signaling	4.96	0.755929	0.185	ACVR1C,BMPR2,CD44,CDH2,CDH5,DKK2,FRZB,FZD8,GJA1,HNF1A,MMP7,MYC,NR5A2,RARB,RPS27A,SFRP5,SOX12,SOX13,SOX17,SOX18,SOX2,SOX5,SOX7,Tcf7,TGFB1,TGFBR1,TGFBR3,UBD,WNT2B,WNT4,WNT7A,WNT7B
Crosstalk between Dendritic Cells and Natural Killer Cells	4.94	-0.242536	0.231	ACTA1,ACTC1,ACTG2,CAMK2A,CD226,CD40LG,CD80,CD83,CD86,CSF2RB,FASLG,HLA-DRA,HLA-DRB5,IL15,IL18,KLRD1,MICB,PRF1,TLR7,TLR9,TNFSF10
Toll-like Receptor Signaling	4.89	1.94145	0.244	CD14,IL18,IL1RL1,IL1RN,IL33,IL36B,LBP,MAP2K6,MAPK12,RPS27A,TICAM2,TLR1,TLR2,TLR5,TLR6,TLR7,TLR8,TLR9,UBD
Endothelin-1 Signaling	4.81	0.179605	0.177	ADCY5,ECE2,GNA14,GNA15,GNAI1,GNAL,GNAT2,GUCY1A1,HMOX1,MAPK10,MAPK12,MAPK15,MAPK7,MYC,PIK3R5,PLA2G1B,PLA2G2A,PLA2G2F,PLA2G4A,PLA2G4E,PLA2G7,PLCB2,PLCB4,PLCE1,PLCH2,PLD1,PLD3,PRKCE,PRKCG,PTGER2,RAP2B,RASD1,RASD2,SHE
Osteoarthritis Pathway	4.69	-0.185695	0.165	ACVRL1,ADAMTS4,ADAMTS5,ANKH,BMPR2,C1QTNF4,CCN4,DCN,ELF3,EPAS1,FGF18,FN1,FRZB,FZD8,GLIS1,HNF1A,IHH,IL1R2,IL1RL1,ITGAV,ITGAX,ITGB2,ITGB6,ITGB8,MMP12,MMP9,PPARG,RBP4,S100A8,S100A9,S1PR3,SMAD6,SPP1,Tcf7,TGFB1,TGFBR1,TLR2,VEGFA,VEGFD
Oxytocin Signaling Pathway	4.6	-1.50756	0.157	CACNA1D,CACNA2D2,CACNB2,CACNB4,CAMK4,CCL5,CTH,GJA1,GNAI1,GNAL,GNG13,GNG2,GUCY1A1,Gucy2g,HSPB2,HSPB7,LPL,MAPK10,MAPK12,MAPK15,MAPK7,MPRIP,MYH11,MYH7,MYH7B,MYL2,NPR3,PIK3R5,PLA2G1B,PLA2G2A,PLA2G2F,PLA2G4A,PLA2G4E,PLCB2,PLCB4,PPARG,PPP1R14A,PRKAR1B,PRKCE,PRKCG,PTGFR,RAP2B,RASD1,RASD2
Airway Pathology in Chronic Obstructive Pulmonary Disease	4.57		0.203	CCL2,CD40LG,CLCF1,CXCL3,FASLG,FGF18,FGF9,GZMB,IL15,Il17d,IL18,IL33,IL36B,LCN2,MMP9,ORM1,OSM,PRF1,RBP4,TGFB1,TNFSF10,TNFSF13,TNFSF8,Tnfsf9
Role of Osteoblasts, Osteoclasts and Chondrocytes in Rheumatoid Arthritis	4.48		0.165	ACP5,ADAMTS4,ADAMTS5,BMP15,BMP6,Bmp8b,BMPR2,CAMK4,COL1A1,CSF1,CTSK,DKK2,FRZB,FZD8,GSN,HNF1A,IGF1,IL18,IL1R2,IL1RL1,IL1RN,IL33,IL36B,MAP2K6,MAPK10,MAPK12,MMP14,PIK3R5,SFRP5,SMAD6,SPP1,Tcf7,TGFB1,WNT2B,WNT4,WNT7A,WNT7B
Pulmonary Healing Signaling Pathway	4.47	-0.685994	0.171	BMPR2,CCNB1,DLK1,EGF,FRK,FZD8,HCK,HNF1A,KDR,LCK,MAPK10,MAPK12,MMP12,MMP14,MMP19,MMP7,MMP9,MYC,NOTCH4,PRKCE,PRKCG,RAP2B,RASD1,RASD2,Tcf7,TGFB1,THBS1,TLR2,VEGFA,VEGFD,WNT2B,WNT4,WNT7A,WNT7B
HIF1α Signaling	4.44	1.52128	0.168	BMP6,CAMK2A,CAMK4,CDKN1A,CYBB,EGF,Flt1,HK2,HK3,HMOX1,HSPA5,IGF1,IGF2,KDR,MAP2K6,MET,MMP12,MMP14,MMP19,MMP7,MMP9,NCF1,PIK3R5,PRKCE,PRKCG,RAP2B,RASD1,RASD2,SERPINE1,SLC2A1,SLC2A5,TF,TGFB1,VEGFA,VEGFD
Circadian Rhythm Signaling	4.43		0.157	ADCY5,ADRB1,BHLHE40,CACNA1D,CACNA2D2,CACNB2,CACNB4,CAMK2A,CTH,FRK,GNA14,GNA15,GNAI1,GNG13,GNG2,GRIA1,GRIA2,GRIN2C,GRIN2D,GRIN3A,GRIN3B,GUCY1A1,Gucy2g,HCK,LCK,MAP2K6,MYC,NPR3,NTRK2,PLCB2,PLCB4,PLCE1,PLCH2,PRKAR1B,PRKCE,PRKCG,RAP2B,RASD1,RASD2,RYR3,TRPC6,VIPR2
Synaptic Long Term Depression	4.28	-0.365148	0.169	CACNA1D,CACNA2D2,CACNB2,CACNB4,CTH,GNA14,GNA15,GNAI1,GNAL,GNAT2,GRIA1,GRIA2,GUCY1A1,Gucy2g,IGF1,NPR3,PLA2G1B,PLA2G2A,PLA2G2F,PLA2G4A,PLA2G4E,PLA2G7,PLCB2,PLCB4,PLCE1,PLCH2,PPP1R17,PRKCE,PRKCG,RAP2B,RASD1,RASD2,RYR3
Ferroptosis Signaling Pathway	4.19	2.44949	0.189	ABCA1,ACSL4,ALOX12,ALOX15,ALOXE3,ANGPTL4,CBS/CBSL,CDKN1A,CTH,CTSB,CYBB,EMP1,FTL,GCH1,H2BC5,HMOX1,RAP2B,RASD1,RASD2,RBL1,SLC1A5,SLC7A11,STEAP3,TF,TFAP2C
Cellular Effects of Sildenafil (Viagra)	4.13		0.181	ACTA1,ACTC1,ACTG2,ADCY5,CACNA1D,CACNA2D2,CACNB2,CACNB4,CAMK4,GUCY1A1,KCNH2,KCNN4,MPRIP,MYH11,MYH7,MYH7B,MYL2,PDE1B,PDE2A,PDE3A,PLCB2,PLCB4,PLCE1,PLCH2,PRKAR1B,SLC4A11,SLC4A5
CCR3 Signaling in Eosinophils	4.02	0	0.185	CAMK4,CCL11,CCR3,GNA14,GNA15,GNAI1,GNAL,GNAT2,GNG13,GNG2,MAPK12,MPRIP,PIK3R5,PLA2G1B,PLA2G2A,PLA2G2F,PLA2G4A,PLA2G4E,PLCB2,PLCB4,PRKCE,PRKCG,RAP2B,RASD1,RASD2
Antioxidant Action of Vitamin C	4	-1.69775	0.196	CSF2RA,CSF2RB,GLRX,HMOX1,MAPK10,MAPK12,NXN,PLA2G1B,PLA2G2A,PLA2G2F,PLA2G4A,PLA2G4E,PLA2G7,PLCB2,PLCB4,PLCE1,PLCH2,PLD1,PLD3,SLC2A1,SLC2A5,TXNRD3
IL-8 Signaling	3.99	0.2	0.162	CR2,CSTB,CYBB,Flt1,GNA14,GNA15,GNAI1,GNAL,GNAT2,GNG13,GNG2,HMOX1,ITGAV,ITGAX,ITGB2,KDR,MAPK10,MAPK12,MMP9,MYL2,NCF1,PIK3R5,PLCB2,PLD1,PLD3,PRKCE,PRKCG,RAP2B,RASD1,RASD2,Rhou,TEK,VEGFA,VEGFD
Gustation Pathway	3.93	1.41421	0.163	ADCY5,ASIC2,CACNA1D,CACNA2D2,CACNB2,CACNB4,GABRA1,GABRA4,GABRR1,GABRR2,GNG13,GUCY1A1,KCNH2,KCNJ12,KCNN4,LIPA,LPL,P2RX1,P2RX4,P2RX6,P2RY1,P2RY12,P2RY2,P2RY6,PDE3A,PLCB2,PRKAR1B,SCN10A,SCN3A,SCN3B,SCN4A,SLC5A1,TRPM5
Iron homeostasis signaling pathway	3.81		0.18	ALAS2,ATP6AP2,ATP6V0C,ATP6V0D2,ATP6V1A,ATP6V1B2,BMP15,BMP6,Bmp8b,BMPR2,CP,EGF,EPAS1,FTL,Hba-a1/Hba-a2,HBB,HMOX1,HP,HPX,PDGFA,SLC11A1,STEAP3,TCIRG1,TF,TMPRSS6
Sertoli Cell-Sertoli Cell Junction Signaling	3.8		0.16	A2M,ACTA1,ACTC1,ACTG2,ACTN2,CLDN10,CLDN4,CLDN5,CLDN6,GUCY1A1,ITGAV,ITGAX,ITGB2,ITGB6,ITGB8,JAM2,MAGI2,MAPK10,MAPK12,MYO7A,PRKAR1B,RAP2B,RASD1,RASD2,SPTB,SPTBN1,TGFBR3,TUBA1C,TUBB1,TUBB2B,TUBB3,TUBB4A,TUBB6
VDR/RXR Activation	3.79	1.26491	0.218	CCL5,CD14,CDKN1A,CEBPA,COL13A1,IGFBP3,IGFBP5,IL1RL1,KLF4,PDGFA,PRKCE,PRKCG,RXRG,SEMA3B,SERPINB1,SPP1,THBD
Neuropathic Pain Signaling In Dorsal Horn Neurons	3.74	-0.447214	0.198	CAMK2A,CAMK4,GRIA1,GRIA2,GRIN2C,GRIN2D,GRIN3A,GRIN3B,KCNH2,KCNN4,NTRK2,PIK3R5,PLCB2,PLCB4,PLCE1,PLCH2,PRKAR1B,PRKCE,PRKCG,TAC1
Apelin Endothelial Signaling Pathway	3.71	-1.5	0.177	ADCY5,APLN,APLNR,CAMK4,CCL2,GNA14,GNA15,GNAI1,GNAL,GNAT2,GNG13,GNG2,GUCY1A1,KLF2,MAPK10,MAPK12,PIK3R5,PLCB2,PLCB4,PRKCE,PRKCG,RAP2B,RASD1,RASD2,TEK
IL-10 Signaling	3.71		0.222	CCR1,CCR5,CD14,FCGR2A,FCGR2B,HMOX1,IL18,IL1R2,IL1RL1,IL1RN,IL33,IL36B,IL4R,LBP,MAP2K6,MAPK12
STAT3 Pathway	3.61	-0.727607	0.178	BMP6,BMPR2,CDKN1A,CSF2RB,EGF,FGFR4,IGF1,IL12RB1,IL1R2,IL1RL1,IL4R,KDR,MAPK10,MAPK12,MYC,NTRK2,PIM1,RAP2B,RASD1,RASD2,TGFB1,TGFBR1,TGFBR3,VEGFA
Neuroprotective Role of THOP1 in Alzheimer's Disease	3.55	-0.242536	0.183	ACE,CFD,CMA1,ECE2,F11,GZMA,GZMB,GZMK,GZMM,MAPT,MMP9,PRKAR1B,PRSS12,PRSS22,Prss30,SERPINA3,ST14,TAC1,TMPRSS4,TMPRSS9,TPP1,TPSAB1/TPSB2
Signaling by Rho Family GTPases	3.48	-1	0.146	ACTA1,ACTC1,ACTG2,ARHGEF10,ARHGEF15,ARHGEF18,BAIAP2,CDC42EP1,CDC42EP2,CDH17,CDH2,CDH23,CDH4,CDH5,CDH9,CYBB,DIAPH3,GFAP,GNA14,GNA15,GNAI1,GNAL,GNAT2,GNG13,GNG2,ITGAV,ITGAX,ITGB2,ITGB6,ITGB8,MAPK10,MAPK12,MYL2,NCF1,PIK3R5,PIP5K1B,PLD1,Rhou,SEPTIN1
RHOGDI Signaling	3.45	1.21268	0.153	ACTA1,ACTC1,ACTG2,ARHGEF10,ARHGEF15,ARHGEF18,CD44,CDH17,CDH2,CDH23,CDH4,CDH5,CDH9,DLC1,ESR1,GNA14,GNA15,GNAI1,GNAL,GNAT2,GNG13,GNG2,ITGAV,ITGAX,ITGB2,ITGB6,ITGB8,MYH11,MYH7,MYH7B,MYL2,PIP5K1B,Rhou
Coagulation System	3.44	0.632456	0.286	A2M,F11,F3,F5,FGG,PLAU,PLAUR,SERPINA1,SERPINE1,THBD
Relaxin Signaling	3.44	0.333333	0.168	ADCY5,CTH,ENPP6,GNA14,GNA15,GNAI1,GNAL,GNAT2,GNG13,GNG2,GUCY1A1,Gucy2g,MMP9,MPPED2,NPR3,PDE10A,PDE1B,PDE2A,PDE3A,PDE8B,PDE9A,PIK3R5,PRKAR1B,SMPDL3A,SMPDL3B,VEGFA
Apelin Cardiomyocyte Signaling Pathway	3.41	-2.52357	0.192	APLN,APLNR,ATP2A3,GNAI1,MAPK10,MAPK12,MAPK15,MAPK7,MYL2,PIK3R5,PLCB2,PLCB4,PLCE1,PLCH2,PRKCE,PRKCG,SLC8A1,SLC8A3,TGFB1
Synaptic Long Term Potentiation	3.4	0.447214	0.176	CAMK2A,CAMK4,GNA14,GNA15,GRIA1,GRIA2,GRIN2C,GRIN2D,GRIN3A,GRIN3B,PLCB2,PLCB4,PLCE1,PLCH2,PPP1R14A,PPP1R3A,PPP1R3C,PRKAR1B,PRKCE,PRKCG,RAP2B,RASD1,RASD2
Actin Cytoskeleton Signaling	3.34	0.894427	0.147	ACTA1,ACTC1,ACTG2,ACTN2,BAIAP2,CD14,DIAPH3,EGF,FGF18,FGF9,FN1,GSN,IQGAP3,ITGAV,ITGAX,ITGB2,ITGB6,ITGB8,LBP,MATK,MPRIP,MYH11,MYH7,MYH7B,MYL2,MYLK2,MYLK3,NCKAP1L,PDGFA,PIK3R5,PIP5K1B,RAP2B,RASD1,RASD2,TIAM1,VAV1
α-Adrenergic Signaling	3.34	-1.66667	0.185	ADCY5,ADRA1A,CAMK4,GNA14,GNA15,GNAI1,GNAL,GNAT2,GNG13,GNG2,GUCY1A1,PRKAR1B,PRKCE,PRKCG,PYGM,RAP2B,RASD1,RASD2,SLC8A1,SLC8A3
Clathrin-mediated Endocytosis Signaling	3.29		0.155	ACTA1,ACTC1,ACTG2,AMPH,AP3S1,APOE,DNM3,EGF,FGF18,FGF9,IGF1,ITGB2,ITGB6,ITGB8,LYZ,MET,ORM1,PCYOX1,PDGFA,PIK3R5,RBP4,RPS27A,S100A8,SERPINA1,SH3BP4,SNAP91,TF,UBD,VEGFA,VEGFD
Ephrin Receptor Signaling	3.24	-0.774597	0.153	ARHGEF15,EFNB1,EFNB2,EGF,EPHA7,EPHA8,EPHB4,GNA14,GNA15,GNAI1,GNAL,GNAT2,GNG13,GNG2,GRIN2C,GRIN2D,GRIN3A,GRIN3B,ITGAV,ITGAX,ITGB2,ITGB6,ITGB8,NCK2,PDGFA,RAP2B,RASD1,RASD2,RGS3,VEGFA,VEGFD
PI3K Signaling in B Lymphocytes	3.23	0.688247	0.168	ATF3,BLNK,BTK,C3,CAMK2A,CAMK4,CARD10,CD180,CD19,CD79B,CR2,FCGR2B,IL4R,Irs3,MALT1,PLCB2,PLCB4,PLCE1,PLCH2,RAP2B,RASD1,RASD2,SYK,VAV1
14-3-3-mediated Signaling	3.2	0.27735	0.173	GFAP,MAPK10,MAPK12,MAPT,PIK3R5,PLCB2,PLCB4,PLCE1,PLCH2,PRKCE,PRKCG,RAP2B,RASD1,RASD2,SFN,TP73,TUBA1C,TUBB1,TUBB2B,TUBB3,TUBB4A,TUBB6
Role of NFAT in Cardiac Hypertrophy	3.2	-0.377964	0.149	ADCY5,AKAP5,CACNA1D,CACNA2D2,CACNB2,CACNB4,CAMK2A,CAMK4,GATA4,GNAI1,GNG13,GNG2,GUCY1A1,HDAC9,IGF1,MAP2K6,MAPK10,MAPK12,PIK3R5,PLCB2,PLCB4,PLCE1,PLCH2,PRKAR1B,PRKCE,PRKCG,RAP2B,RASD1,RASD2,SLC8A1,SLC8A3,TGFB1,TGFBR1
IL-17 Signaling	3.18	0.557086	0.155	CCL11,CCL2,CCL22,CD40LG,CLCF1,CXCL3,FASLG,IL15,Il17d,IL18,IL33,IL36B,LCN2,MAP2K6,MAPK10,MAPK12,MMP9,OSM,PIK3R5,RAP2B,RASD1,RASD2,TGFB1,TNFSF10,TNFSF13,TNFSF8,Tnfsf9,VEGFA,VEGFD
Chemokine Signaling	3.16	-1.06904	0.2	CAMK2A,CAMK4,CCL11,CCL2,CCL5,CCR3,CCR5,GNAI1,MAPK12,MPRIP,MYL2,PLCB2,PLCB4,RAP2B,RASD1,RASD2
SNARE Signaling Pathway	3.16	-1.4596	0.169	ADCY5,CACNA2D2,CACNB2,CACNB4,CAMK2A,CAMK4,GUCY1A1,MYH11,MYH7,MYH7B,MYL2,PRKAR1B,RAB39A,SNAP25,SNAP91,SNCG,STXBP6,SYT1,SYT13,SYT17,SYT5,SYT8,UNC13A
p38 MAPK Signaling	3.14	1.14708	0.175	CDC25B,FASLG,HSPB2,HSPB7,IL18,IL1R2,IL1RL1,IL1RN,IL33,IL36B,MAP2K6,MAPK12,MAPT,MYC,PLA2G1B,PLA2G2A,PLA2G2F,PLA2G4A,PLA2G4E,TGFB1,TGFBR1
G Beta Gamma Signaling	3.1	-1.78885	0.171	BTK,CACNA1D,CACNA2D2,CACNB2,CACNB4,CAV1,CAV2,GNA14,GNA15,GNAI1,GNAL,GNAT2,GNG13,GNG2,KCNJ3,KCNJ5,PRKAR1B,PRKCE,PRKCG,RAP2B,RASD1,RASD2
Thrombin Signaling	3.1	-2.06474	0.147	ADCY5,ARHGEF10,ARHGEF15,ARHGEF18,ARHGEF26,CAMK2A,CAMK4,EGF,GATA2,GATA3,GATA4,GNA14,GNA15,GNAI1,GNAL,GNAT2,GNG13,GNG2,GUCY1A1,MAPK12,MPRIP,MYL2,PIK3R5,PLCB2,PLCB4,PLCE1,PLCH2,PRKCE,PRKCG,RAP2B,RASD1,RASD2,Rhou
LPS/IL-1 Mediated Inhibition of RXR Function	3.04	0.632456	0.142	ABCA1,ABCB11,ACSBG1,ACSL4,ALDH18A1,ALDH1A1,ALDH1L2,ALDH3A1,APOE,CD14,CHST1,Cyp2c23,Cyp2d22,CYP2E1,CYP2F1,FABP4,FABP5,FMO1,FMO2,FMO3,GAL3ST2,HMGCS2,HS3ST3B1,HS6ST2,IL18,IL1R2,IL1RL1,IL1RN,IL33,IL36B,LBP,NR5A2,PPARGC1B,SLCO1A2,SOD3,Sult1c2 (includes others)
Phospholipases	3.03	1.94145	0.209	HMOX1,LPL,PLA2G1B,PLA2G2A,PLA2G2F,PLA2G4A,PLA2G4E,PLA2G7,PLCB2,PLCB4,PLCE1,PLCH2,PLD1,PLD3
Dilated Cardiomyopathy Signaling Pathway	3.01	0.727607	0.162	ACTA1,ACTC1,ACTG2,ADCY5,ADRB1,CACNA1D,CACNA2D2,CACNB2,CACNB4,CAMK2A,CAMK4,CNN1,DSC2,GUCY1A1,MAPK12,MYH11,MYH7,MYH7B,MYL2,PDE2A,PDE3A,PRKAR1B,PRKCE,TNNI3
tRNA Splicing	3	-1.26491	0.239	ENPP6,MPPED2,PDE10A,PDE1B,PDE2A,PDE3A,PDE8B,PDE9A,SMPDL3A,SMPDL3B,TSEN34
Eicosanoid Signaling	2.97	1.13389	0.206	ALOX12,ALOX15,CYSLTR1,PLA2G1B,PLA2G2A,PLA2G2F,PLA2G4A,PLA2G4E,PLA2G7,PTGER2,PTGES,PTGFR,TBXA2R,TBXAS1
Macropinocytosis Signaling	2.94	0.816497	0.197	CD14,CSF1,EGF,ITGB2,ITGB6,ITGB8,MET,MRC1,PDGFA,PIK3R5,PRKCE,PRKCG,RAP2B,RASD1,RASD2
GABA Receptor Signaling	2.92		0.165	ADCY5,CACNA1D,CACNA2D2,CACNB2,CACNB4,GABRA1,GABRA4,GABRR1,GABRR2,GNA14,GNA15,GNAI1,GNAL,GNAT2,GNG13,GNG2,GUCY1A1,KCNH2,KCNN4,RPS27A,SLC6A12,UBD
Neuregulin Signaling	2.89	-0.27735	0.171	AREG,BTC,DCN,EGF,ERBB4,EREG,ITGAV,ITGAX,ITGB2,ITGB6,ITGB8,MATK,MYC,NRG1,NRG4,PRKCE,PRKCG,RAP2B,RASD1,RASD2
Inhibition of Angiogenesis by TSP1	2.88	-0.707107	0.265	GUCY1A1,KDR,MAPK10,MAPK12,MMP9,TGFB1,TGFBR1,THBS1,VEGFA
Fc Epsilon RI Signaling	2.84	1.21268	0.169	BTK,FCER1A,IGHE,MAP2K6,MAPK10,MAPK12,MS4A2,PIK3R5,PLA2G1B,PLA2G2A,PLA2G2F,PLA2G4A,PLA2G4E,PRKCE,PRKCG,RAP2B,RASD1,RASD2,SYK,VAV1
GPCR-Mediated Nutrient Sensing in Enteroendocrine Cells	2.84	-1.14708	0.169	ADCY5,CACNA1D,CACNA2D2,CACNB2,CACNB4,GNA14,GNA15,GNAI1,GNG13,GNG2,GUCY1A1,PLCB2,PLCB4,PLCE1,PLCH2,PRKAR1B,PRKCE,PRKCG,RAPGEF4,TRPM5
ERBB Signaling	2.81	-0.774597	0.181	AREG,BTC,EGF,ERBB4,EREG,MAP2K6,MAPK10,MAPK12,NCK2,NRG1,NRG4,PIK3R5,PRKCE,PRKCG,RAP2B,RASD1,RASD2
GP6 Signaling Pathway	2.81	-0.229416	0.165	BTK,CAMK4,COL13A1,COL16A1,COL19A1,COL1A1,COL27A1,COL4A3,Col6a4,COL8A1,COL9A2,FGG,ITK,LAMA1,LAMC3,PIK3R5,PRKCE,PRKCG,RASGRP2,SYK,VAV1
Nitric Oxide Signaling in the Cardiovascular System	2.8	-1.5	0.168	ADRB1,ATP2A3,CACNA1D,CACNA2D2,CACNB2,CACNB4,CAMK4,CAV1,Flt1,GUCY1A1,KDR,PDE1B,PDE2A,PIK3R5,PRKAR1B,PRKCE,PRKCG,SLC7A1,VEGFA,VEGFD
IL-12 Signaling and Production in Macrophages	2.79		0.162	ALOX12,ALOX15,APOE,CD40LG,IL12RB1,IL18,LYZ,MAPK10,MAPK12,MST1,ORM1,PCYOX1,PIK3R5,PPARG,PRKCE,PRKCG,RBP4,S100A8,SERPINA1,SPI1,TGFB1,TLR2
Molecular Mechanisms of Cancer	2.78		0.123	ADCY5,ARHGEF10,ARHGEF15,ARHGEF18,BMP15,BMP6,Bmp8b,BMPR2,CAMK2A,CCNE1,CDC25B,CDK1,CDKN1A,CHEK2,FASLG,FZD8,GNA14,GNA15,GNAI1,GNAL,GNAT2,GNG13,GNG2,GUCY1A1,HDAC9,IHH,ITGAV,ITGAX,ITGB2,ITGB6,ITGB8,MAP2K6,MAPK10,MAPK12,MYC,PIK3R5,PLCB2,PLCB4,PRKAR1B,PRKCE,PRKCG,RAP2B,RASD1,RASD2,RASGRF1,RBL1,Rhou,SHH,SMAD6,TGFB1,TGFBR1,WNT2B,WNT4,WNT7A,WNT7B
Primary Immunodeficiency Signaling	2.78		0.214	BLNK,BTK,CD19,CD3D,CD3E,CD4,CD40LG,CD8A,CIITA,IGHE,LCK,ZAP70
BMP signaling pathway	2.76	-1.38675	0.184	BMP15,BMP6,Bmp8b,BMPR2,CAMK4,FST,MAPK10,MAPK12,NOG,PRKAR1B,RAP2B,RASD1,RASD2,SMAD6,SOSTDC1,ZNF423
Calcium Signaling	2.73	-1.09109	0.142	ACTA1,ACTC1,AKAP5,ATP2A3,CACNA1D,CACNA2D2,CACNB2,CACNB4,CAMK2A,CAMK4,CHRNA10,CHRNA4,GRIA1,GRIA2,GRIN2C,GRIN2D,GRIN3A,GRIN3B,HDAC9,MYH11,MYH7,MYH7B,MYL2,PRKAR1B,RAP2B,RYR3,SLC8A1,SLC8A3,TNNI3,TRPC3,TRPC6
Glucocorticoid Receptor Signaling	2.72		0.117	A2M,CAV1,CCL11,CCL2,CCL5,CD247,CD3D,CD3E,CD3G,CDKN1A,CEBPA,CSF2RB,CXCL3,DNALI1,EGF,ESR1,FBP1,FCGR1A,FGG,FKBP5,GJA1,H2-M2,H2-T22,H2-T24,HLA-DQA1,HLA-DQB1,HLA-DRA,HLA-DRB5,HP,HSPA5,IGF1,IL12RB1,IL1R2,IL1RL1,IL1RN,IL4R,KRT14,KRT17,KRT5,KRT76,LOC100909593/RT1-DMa,LOC100909630/RT1-DMb,MAPK10,MAPK12,MMP9,MYC,NDUFA4L2,NR3C2,PDK4,PGR,PIK3R5,PLA2G1B,PLA2G2A,PLA2G2F,PLA2G4A,PLA2G4E,PLAU,PPARG,RAP2B,RARB,RA…
Reelin Signaling in Neurons	2.67	-0.471405	0.158	APOE,ARHGEF10,ARHGEF15,ARHGEF18,ARHGEF26,CAMK2A,CDH2,CNR2,DNALI1,FRK,GRIN2C,GRIN2D,GRIN3A,GRIN3B,HCK,LCK,MAP2K6,MAPK10,MAPK12,MAPT,PDK4,PIK3R5
MSP-RON Signaling Pathway	2.64		0.207	ACTA1,ACTC1,ACTG2,CCL2,CSF1,CSF2RB,F11,ITGB2,KLK13,MST1,PIK3R5,TLR2
Senescence Pathway	2.62	0.685994	0.131	ACVR1C,ATF3,BHLHE40,BMPR2,CACNA1D,CACNA2D2,CACNB2,CACNB4,CAMK4,CBX7,CCNB1,CCNE1,CDC25B,CDK1,CDKN1A,CHEK2,ELF3,GADD45G,GATA4,MAP2K6,MAPK12,MAPK15,MAPK7,PARP1,PDK4,PHF19,PIK3R5,RAP2B,RASD1,RASD2,RBL1,SERPINE1,SMAD6,SOD2,STING1,TGFB1,TGFBR1,TGFBR3,TLR2
Salvage Pathways of Pyrimidine Ribonucleotides	2.61	-0.5	0.173	AK4,AK7,AK8,AK9,APOBEC1,APOBEC3B,CDK1,DMPK,GRK5,MAK,MAP2K6,MAPK7,PIM1,PRKCE,SGK1,TTK,UPRT
B Cell Development	2.6		0.227	CD19,CD79B,CD80,CD86,HLA-DQA1,HLA-DQB1,HLA-DRA,HLA-DRB5,LOC100909593/RT1-DMa,LOC100909630/RT1-DMb
FAK Signaling	2.6	0.0949158	0.107	ACKR4,ACVR1C,ADGRE1,ADGRF5,ADGRG1,ADGRL1,ADGRL3,ADGRL4,ADGRV1,ADORA1,ADORA2B,Adora3/LOC100911796,ADRA1A,ADRB1,AGTR2,APLNR,BMPR2,BRS3,C3AR1,C5AR1,CALCRL,CCR1,CCR3,CCR5,CCR8,CD247,CD3D,CD3E,CD3G,CDH5,Chrm2,CHRM4,CNR2,COL1A1,CSF2RB,CYSLTR1,EFNB1,EFNB2,EGF,ELF3,Flt1,FZD8,GALR3,GCGR,GPR157,GPR158,GPR161,GPR179,GPR182,GPR183,GPR34,GPR4,GPR50,GPR68,GPR88,HNF1A,HRH4,HTR2B,IL12RB1,IL1R2,IL1RL1,IL33,IL4R,I…
G Protein Signaling Mediated by Tubby	2.6		0.227	GNA14,GNA15,GNAI1,GNAL,GNAT2,GNG13,GNG2,LCK,PLCB2,PLCB4
P2Y Purigenic Receptor Signaling Pathway	2.56	1.21268	0.158	ADCY5,GNAI1,GNG13,GNG2,GUCY1A1,MYC,P2RY1,P2RY12,P2RY2,P2RY6,PIK3R5,PLCB2,PLCB4,PLCE1,PLCH2,PRKAR1B,PRKCE,PRKCG,RAP2B,RASD1,RASD2
Acute Myeloid Leukemia Signaling	2.55	-1.26491	0.176	CEBPA,CSF2RA,CSF2RB,HNF1A,IDH1,KIT,MAP2K6,MYC,PIK3R5,PIM1,PIM2,RAP2B,RASD1,RASD2,SPI1,Tcf7
Gαs Signaling	2.54	0.83205	0.16	ADCY5,ADD2,ADORA2B,ADRB1,GNA14,GNA15,GNAI1,GNAL,GNAT2,GNG13,GNG2,GUCY1A1,HCK,MC2R,MC5R,PRKAR1B,PTGER2,RAPGEF4,RYR3,VIPR2
GADD45 Signaling	2.51	-1.1547	0.2	ACVR1C,CCNB1,CCNE1,CDK1,CDKN1A,GADD45G,MAP2K6,MAPK10,MAPK12,MYC,TGFB1,TGFBR1
Germ Cell-Sertoli Cell Junction Signaling	2.47		0.146	A2M,ACTA1,ACTC1,ACTG2,ACTN2,CDH2,GSN,LAMC3,MAP2K6,MAPK10,MAPK12,MYO7A,PIK3R5,RAP2B,RASD1,RASD2,Rhou,TGFB1,TGFBR1,TUBA1C,TUBB1,TUBB2B,TUBB3,TUBB4A,TUBB6
FcγRIIB Signaling in B Lymphocytes	2.44	0.707107	0.176	BLNK,BTK,CACNA1D,CACNA2D2,CACNB2,CACNB4,CD79B,FCGR2B,MAPK10,MAPK12,PIK3R5,RAP2B,RASD1,RASD2,SYK
IL-6 Signaling	2.41	0.5	0.156	A2M,CD14,COL1A1,HSPB2,HSPB7,IL18,IL1R2,IL1RL1,IL1RN,IL33,IL36B,LBP,MAP2K6,MAPK10,MAPK12,PIK3R5,RAP2B,RASD1,RASD2,VEGFA
Fcγ Receptor-mediated Phagocytosis in Macrophages and Monocytes	2.4	1.5	0.17	ACTA1,ACTC1,ACTG2,FCGR1A,FCGR2A,HCK,HMOX1,MYO5A,NCF1,NCK2,PLD1,PLD3,PRKCE,PRKCG,SYK,VAV1
Estrogen-mediated S-phase Entry	2.39	1.13389	0.269	CCNA2,CCNE1,CDK1,CDKN1A,ESR1,MYC,RBL1
Dopamine-DARPP32 Feedback in cAMP Signaling	2.38	-0.229416	0.142	ADCY5,ATP2A3,CACNA1D,CACNA2D2,CACNB2,CACNB4,CAMK4,GNAI1,GRIN2C,GRIN2D,GRIN3A,GRIN3B,GUCY1A1,KCNJ12,KCNJ3,KCNJ5,PLCB2,PLCB4,PLCE1,PLCH2,PPP1R14A,PPP1R3A,PPP1R3C,PRKAR1B,PRKCE,PRKCG
Cardiac Hypertrophy Signaling	2.33	-0.408248	0.131	ADCY5,ADRA1A,ADRB1,CACNA1D,CACNA2D2,CACNB2,CACNB4,CAMK4,GATA4,GNA14,GNA15,GNAI1,GNAL,GNAT2,GNG13,GNG2,GUCY1A1,IGF1,MAP2K6,MAPK10,MAPK12,MYL2,PIK3R5,PLCB2,PLCB4,PLCE1,PLCH2,PRKAR1B,RAP2B,RASD1,RASD2,Rhou,TGFB1,TGFBR1
Role of MAPK Signaling in Promoting the Pathogenesis of Influenza	2.32	2.18282	0.159	ATP6AP2,ATP6V0C,ATP6V0D2,ATP6V1A,ATP6V1B2,MAP2K6,MAPK10,MAPK12,PLA2G1B,PLA2G2A,PLA2G2F,PLA2G4A,PLA2G4E,PLA2G7,RAP2B,RASD1,RASD2,TCIRG1
HMGB1 Signaling	2.3	0.632456	0.144	CCL2,CD40LG,CLCF1,FASLG,IL15,Il17d,IL18,IL33,IL36B,MAP2K6,MAPK10,MAPK12,OSM,PIK3R5,RAP2B,RASD1,RASD2,Rhou,SERPINE1,TGFB1,TNFSF10,TNFSF13,TNFSF8,Tnfsf9
Ovarian Cancer Signaling	2.3	0.333333	0.146	CD44,EGF,FGF9,FZD8,GJA1,HDAC9,HNF1A,MMP7,MMP9,PIK3R5,PRKAR1B,RAD51,RAP2B,RASD1,RASD2,RBL1,Tcf7,VEGFA,VEGFD,WNT2B,WNT4,WNT7A,WNT7B
Basal Cell Carcinoma Signaling	2.27	-2.12132	0.181	BMP15,BMP6,Bmp8b,FZD8,GLIS1,HHIP,HNF1A,SHH,Tcf7,WNT2B,WNT4,WNT7A,WNT7B
Ephrin B Signaling	2.27	-1.50756	0.181	EFNB1,EFNB2,EPHB4,GNA14,GNA15,GNAI1,GNAL,GNAT2,GNG13,GNG2,NCK2,RGS3,VAV1
ERK/MAPK Signaling	2.23	1.09109	0.134	DUSP4,DUSP9,ELF3,ESR1,HSPB2,HSPB7,ITGAV,ITGAX,ITGB2,ITGB6,ITGB8,MYC,PIK3R5,PLA2G1B,PLA2G2A,PLA2G2F,PLA2G4A,PLA2G4E,PPARG,PPP1R14A,PPP1R3A,PPP1R3C,PRKAR1B,PRKCE,PRKCG,RAP2B,RAPGEF4,RASD1,RASD2
Bladder Cancer Signaling	2.2	0	0.155	CDKN1A,EGF,FGF18,FGF9,HDAC9,MMP12,MMP14,MMP19,MMP7,MMP9,MYC,RAP2B,RASD1,RASD2,RBL1,THBS1,VEGFA,VEGFD
Role of MAPK Signaling in the Pathogenesis of Influenza	2.18		0.171	CCL2,CCL5,MAP2K6,MAPK10,MAPK12,PLA2G1B,PLA2G2A,PLA2G2F,PLA2G4A,PLA2G4E,PLA2G7,RAP2B,RASD1,RASD2
Cysteine Biosynthesis/Homocysteine Degradation	2.17		1	CBS/CBSL,CTH
Apelin Adipocyte Signaling Pathway	2.16	-2.11058	0.165	ADCY5,APLN,APLNR,CYBB,GNAI1,GPX1,Gsta4,GUCY1A1,MAPK10,MAPK12,MAPK15,MAPK7,NCF1,PRKAR1B,PTGES
VEGF Family Ligand-Receptor Interactions	2.09	0	0.167	KDR,PIK3R5,PLA2G1B,PLA2G2A,PLA2G2F,PLA2G4A,PLA2G4E,PRKCE,PRKCG,RAP2B,RASD1,RASD2,VEGFA,VEGFD
IL-4 Signaling	2.07		0.161	FCER2,HLA-DQA1,HLA-DQB1,HLA-DRA,HLA-DRB5,IGHE,IL4R,IRF4,LOC100909593/RT1-DMa,LOC100909630/RT1-DMb,NR3C2,PIK3R5,RAP2B,RASD1,RASD2
MIF Regulation of Innate Immunity	2.07	1	0.205	CD14,CD74,MAPK10,MAPK12,PLA2G1B,PLA2G2A,PLA2G2F,PLA2G4A,PLA2G4E
Remodeling of Epithelial Adherens Junctions	2.06		0.176	ACTA1,ACTC1,ACTG2,ACTN2,DNM3,MET,TUBA1C,TUBB1,TUBB2B,TUBB3,TUBB4A,TUBB6
White Adipose Tissue Browning Pathway	2.05	-1.14708	0.145	ADCY5,CACNA1D,CACNA2D2,CACNB2,CACNB4,FCER1A,FGFR4,GUCY1A1,KDR,MAPK12,MS4A2,PPARG,PRKAR1B,RARB,RUNX1T1,RXRG,SLC16A1,THRA,VEGFA,VGF
PPARα/RXRα Activation	2.02	0.5	0.133	ABCA1,ACVR1C,ADCY5,BMPR2,CHD5,Cyp2c23,FASN,GNA14,GNA15,GUCY1A1,IL1R2,IL1RL1,LPL,MAP2K6,NR2F1,PLCB2,PLCB4,PLCE1,PLCH2,PRKAR1B,RAP2B,RASD1,RASD2,TGFB1,TGFBR1,TGFBR3
Coronavirus Replication Pathway	2.01	0.333333	0.2	ACE,Ifitm1,IFITM10,TUBA1C,TUBB1,TUBB2B,TUBB3,TUBB4A,TUBB6
Erythropoietin Signaling Pathway	1.99	0	0.136	CD40LG,CLCF1,CSF2RB,FASLG,Hba-a1/Hba-a2,HBB,IL15,Il17d,IL18,IL33,IL36B,OSM,PIK3R5,PRKCE,PRKCG,RAP2B,RASD1,RASD2,TGFB1,TNFSF10,TNFSF13,TNFSF8,Tnfsf9,TRPC3
eNOS Signaling	1.97	-1.88562	0.138	ADCY5,AQP3,CAMK4,CAV1,CCNA2,CHRM4,CHRNA10,CHRNA4,ESR1,Flt1,GUCY1A1,HSPA5,KDR,LPAR3,NOSTRIN,PIK3R5,PRKAR1B,PRKCE,PRKCG,SLC7A1,VEGFA,VEGFD
Notch Signaling	1.97	-1.34164	0.211	CNTN1,DLL1,DLL4,DTX1,HEY1,HEY2,MFNG,NOTCH4
CDK5 Signaling	1.94	2.13809	0.149	ADCY5,GNAL,GUCY1A1,LAMA1,MAPK10,MAPK12,MAPK15,MAPK7,MAPT,NTRK2,PPP1R14A,PPP1R3A,PPP1R3C,PRKAR1B,RAP2B,RASD1,RASD2
p70S6K Signaling	1.94	-0.5	0.144	BTK,CD19,CD79B,GNAI1,IL4R,MAPT,PIK3R5,PLCB2,PLCB4,PLCE1,PLCH2,PLD1,PRKCE,PRKCG,RAP2B,RASD1,RASD2,SFN,SYK
Gα12/13 Signaling	1.91	0.242536	0.143	BTK,CDH17,CDH2,CDH23,CDH4,CDH5,CDH9,LPAR3,MAPK10,MAPK12,MAPK7,MYL2,PIK3R5,RAP2B,RASD1,RASD2,TBXA2R,TEC,VAV1
Inhibition of Matrix Metalloproteases	1.9	-0.707107	0.205	A2M,MMP12,MMP14,MMP19,MMP7,MMP9,THBS2,TIMP1
nNOS Signaling in Neurons	1.89	-0.377964	0.191	CAMK2A,CAMK4,GRIN2C,GRIN2D,GRIN3A,GRIN3B,PRKCE,PRKCG,RASD1
IL-13 Signaling Pathway	1.86	0.727607	0.147	ALOX15,ARG1,CCL11,CHI3L1,CXCL6,FRK,HCK,IL24,IL33,IL4R,LCK,MAPK12,PDGFA,PIK3R5,Retnla,SPDEF,TGFB1
Role of Tissue Factor in Cancer	1.86		0.147	CSF1,F3,FGG,FRK,GNA14,GNA15,HCK,ITGAV,LCK,MAPK12,P4HB,PIK3R5,PLAUR,RAP2B,RASD1,RASD2,VEGFA
BEX2 Signaling Pathway	1.84	-1.94145	0.16	CDH2,CDKN1A,HNF1A,ITGB6,LGALS1,MAP2,MAPK10,MAPK12,PLXNC1,SPP1,Tcf7,VEGFA,VEGFD
GNRH Signaling	1.84	-1.5	0.13	ADCY5,CACNA1D,CACNA2D2,CACNB2,CACNB4,CAMK2A,CAMK4,GNA14,GNA15,GNAI1,GNG13,GNG2,GUCY1A1,MAP2K6,MAPK10,MAPK12,MAPK7,PLCB2,PLCB4,PRKAR1B,PRKCE,PRKCG,RAP2B,RASD1,RASD2
Pancreatic Adenocarcinoma Signaling	1.84	0	0.143	CCNE1,CDKN1A,CYP2E1,EGF,HDAC9,HMOX1,MAPK10,MAPK12,MMP9,PIK3R5,PLD1,PLD3,RAD51,RBL1,TGFB1,TGFBR1,VEGFA,VEGFD
Apelin Muscle Signaling Pathway	1.83		0.188	APLN,APLNR,GNA14,GNA15,GNAI1,GNAL,GNAT2,GNG13,GNG2
Paxillin Signaling	1.83	-1	0.148	ACTA1,ACTC1,ACTG2,ACTN2,ITGAV,ITGAX,ITGB2,ITGB6,ITGB8,MAPK10,MAPK12,NCK2,PIK3R5,RAP2B,RASD1,RASD2
Glioma Invasiveness Signaling	1.82	2.33333	0.164	CD44,HMMR,ITGAV,MMP9,PIK3R5,PLAU,PLAUR,RAP2B,RASD1,RASD2,Rhou,TIMP1
MSP-RON Signaling In Macrophages Pathway	1.76	0.242536	0.143	ARG1,CIITA,F11,HLA-DQA1,HLA-DQB1,HLA-DRA,HLA-DRB5,ITGB2,KLK13,LOC100909593/RT1-DMa,LOC100909630/RT1-DMb,MST1,PIK3R5,RAP2B,RASD1,RASD2,ST14
Epithelial Adherens Junction Signaling	1.75	1.09109	0.134	ACVR1C,BAIAP2,BMPR2,CDH2,DLL1,ECT2,EGF,HNF1A,MAGI2,MET,MST1,NOTCH4,RACGAP1,RAP2B,RASD1,RASD2,SFN,Tcf7,TGFBR1,TGFBR3,TIAM1
RAC Signaling	1.75	2.52982	0.138	ANK1,BAIAP2,CD44,CYBB,IQGAP3,ITGAV,ITGAX,ITGB2,ITGB6,ITGB8,MCF2L,NCF1,PIK3R5,PIP5K1B,PLD1,RAP2B,RASD1,RASD2,TIAM1
N-acetylglucosamine Degradation I	1.72		0.667	AMDHD2,GNPDA1
Aryl Hydrocarbon Receptor Signaling	1.69	1.60357	0.132	ALDH18A1,ALDH1A1,ALDH1L2,ALDH3A1,CCNA2,CCNE1,CDKN1A,CHEK2,CTSD,Cyp2c23,ESR1,FASLG,HSPB2,HSPB7,MYC,NR2F1,RARB,RBL1,RXRG,TGFB1,TP73
CXCR4 Signaling	1.68	-0.27735	0.13	ADCY5,CD4,GNA14,GNA15,GNAI1,GNAL,GNAT2,GNG13,GNG2,GUCY1A1,MAPK10,MAPK12,MYL2,PIK3R5,PLCB2,PLCB4,PRKCE,PRKCG,RAP2B,RASD1,RASD2,Rhou
fMLP Signaling in Neutrophils	1.68	0.301511	0.137	CAMK4,CYBB,GNA14,GNA15,GNAI1,GNAL,GNAT2,GNG13,GNG2,NCF1,PIK3R5,PLCB2,PLCB4,PRKCE,PRKCG,RAP2B,RASD1,RASD2
Renin-Angiotensin Signaling	1.67	-0.57735	0.139	ACE,ADCY5,AGTR2,CCL2,CCL5,GUCY1A1,MAPK10,MAPK12,PIK3R5,PRKAR1B,PRKCE,PRKCG,PTGER2,RAP2B,RASD1,RASD2,SHE
Gαq Signaling	1.66	0.727607	0.129	ADRA1A,BTK,CAMK4,GNA14,GNA15,GNAI1,GNAL,GNAT2,GNG13,GNG2,HMOX1,HTR2B,PIK3R5,PLCB2,PLCB4,PLD1,PLD3,PRKCE,PRKCG,RGS18,RGS7,Rhou
Oncostatin M Signaling	1.66	2.23607	0.186	CHI3L1,EPAS1,OSM,OSMR,PLAU,RAP2B,RASD1,RASD2
Semaphorin Neuronal Repulsive Signaling Pathway	1.65	-0.242536	0.132	BCAN,CD44,CRMP1,CSPG5,GUCY1A1,ITGAV,ITGAX,ITGB2,ITGB6,ITGB8,MAP2K6,MAPT,MPRIP,MYL2,PIK3R5,PRKAR1B,SEMA3A,SEMA6A,SEMA6B,VCAN
Virus Entry via Endocytic Pathways	1.65		0.144	ACTA1,ACTC1,ACTG2,AP3S1,CAV1,FOLR1,ITGB2,ITGB6,ITGB8,PIK3R5,PRKCE,PRKCG,RAP2B,RASD1,RASD2
ILK Signaling	1.64	-1.70561	0.125	ACTA1,ACTC1,ACTG2,ACTN2,FERMT2,FN1,Irs3,ITGB2,ITGB6,ITGB8,LIMS2,MAP2K6,MAPK10,MAPK12,MMP9,MYC,MYH11,MYH7,MYH7B,MYL2,NCK2,PIK3R5,Rhou,VEGFA,VEGFD
Role of IL-17A in Psoriasis	1.63	2	0.286	CXCL3,CXCL6,S100A8,S100A9
SPINK1 Pancreatic Cancer Pathway	1.63	-3.16228	0.167	CPA3,CPA4,CPB2,CPZ,CTSA,CTSB,KLK13,MMP12,TGFB1,TGFBR1
NF-κB Activation by Viruses	1.61	-0.333333	0.154	CCR5,CD4,CR2,ITGAV,LCK,PIK3R5,PRKCE,PRKCG,RAP2B,RASD1,RASD2,TNFRSF14
MIF-mediated Glucocorticoid Regulation	1.6	1.88982	0.194	CD14,CD74,PLA2G1B,PLA2G2A,PLA2G2F,PLA2G4A,PLA2G4E
RHOA Signaling	1.6	0	0.137	ACTA1,ACTC1,ACTG2,ANLN,BAIAP2,CDC42EP1,CDC42EP2,DLC1,IGF1,LPAR3,MPRIP,MYL2,MYLK2,MYLK3,PIP5K1B,PLD1,SEPTIN1
Estrogen Receptor Signaling	1.58	0	0.11	ADCY5,CACNA1D,CACNA2D2,CACNB2,CACNB4,CAV1,CDKN1A,EGF,ESR1,GNA14,GNA15,GNAI1,GNAL,GNAT2,GNG13,GNG2,GUCY1A1,IGF1,IGF2,LEPR,MMP12,MMP14,MMP19,MMP7,MMP9,MPRIP,MYC,MYL2,NDUFA4L2,PGR,PIK3R5,PLCB2,PLCB4,PLCE1,PLCH2,PRKAR1B,PRKCE,PRKCG,RAP2B,RASD1,RASD2,SHE,SOD2,VEGFA,VEGFD
HOTAIR Regulatory Pathway	1.58	1.96396	0.129	CD44,CDKN1A,COL1A1,ESR1,HNF1A,JAM2,MET,MMP12,MMP14,MMP19,MMP7,MMP9,MYC,PIK3R5,SPP1,Tcf7,TGFB1,WNT2B,WNT4,WNT7A,WNT7B
Agrin Interactions at Neuromuscular Junction	1.57	-1	0.157	ACTA1,ACTC1,ACTG2,ERBB4,MAPK10,MAPK12,NRG1,NRG4,RAP2B,RASD1,RASD2
RAR Activation	1.55		0.123	ADCY5,ADH7,Akr1c19,ALDH1A1,CITED2,CSF2RB,DHRS9,GUCY1A1,IGFBP3,LRAT,MAPK10,MAPK12,NR2F1,PARP1,PRKAR1B,PRKCE,PRKCG,RARB,RBP4,RXRG,SDR9C7,SMAD6,TGFB1,VEGFA,ZBTB16
Serotonin Receptor Signaling	1.55		0.178	ADCY5,GCH1,GUCY1A1,HTR2B,SLC18A1,SLC18A2,SLC6A4,TPH1
Sonic Hedgehog Signaling	1.55	0	0.207	CCNB1,CDK1,GLIS1,HHIP,PRKAR1B,SHH
Regulation of Cellular Mechanics by Calpain Protease	1.53	-1	0.146	ACTN2,CCNA2,CCNE1,CDK1,EGF,ITGAV,ITGAX,ITGB2,ITGB6,ITGB8,RAP2B,RASD1,RASD2
Regulation of the Epithelial-Mesenchymal Transition Pathway	1.52		0.123	CDH2,EGF,FGF18,FGF9,FGFR4,FZD8,HNF1A,MAP2K6,MET,MMP9,NOTCH4,PIK3R5,PYGO1,RAP2B,RASD1,RASD2,Tcf7,TGFB1,TGFBR1,WNT2B,WNT4,WNT7A,WNT7B,ZEB1
Endocannabinoid Developing Neuron Pathway	1.51	-0.57735	0.134	ADCY5,CNR2,GNAI1,GNAL,GNG13,GNG2,GUCY1A1,MAP2K6,MAPK10,MAPK12,MAPK15,MAPK7,PIK3R5,PRKAR1B,RAP2B,RASD1,RASD2
PAK Signaling	1.5	-0.707107	0.136	ARHGAP10,DSCAM,ITGAV,ITGAX,ITGB2,ITGB6,ITGB8,MAPK10,MAPK12,MYL2,NCK2,PDGFA,PIK3R5,RAP2B,RASD1,RASD2
Pathogenesis of Multiple Sclerosis	1.5		0.333	CCL5,CCR1,CCR5
Melatonin Signaling	1.49	-0.904534	0.153	CAMK2A,CAMK4,GNAI1,MAP2K6,PLCB2,PLCB4,PLCE1,PLCH2,PRKAR1B,PRKCE,PRKCG
Netrin Signaling	1.49	-2.11058	0.153	ABLIM2,ABLIM3,CACNA1D,CACNA2D2,CACNB2,CACNB4,NCK2,NTN1,PRKAR1B,RYR3,UNC5D
Oxytocin In Brain Signaling Pathway	1.48	-0.408248	0.122	CACNA1D,CACNA2D2,CACNB2,CACNB4,CAMK4,GNAI1,GNAL,GNG13,GNG2,KCNJ13,MAPK7,NLRP6,PIK3R5,PLA2G1B,PLA2G2A,PLA2G2F,PLA2G4A,PLA2G4E,PLA2G7,PRKCE,PRKCG,RAP2B,RASD1,RASD2
Cholecystokinin/Gastrin-mediated Signaling	1.47	-0.83205	0.134	IL18,IL1RN,IL33,IL36B,MAP2K6,MAPK10,MAPK12,MAPK7,PLCB2,PLCB4,PRKCE,PRKCG,RAP2B,RASD1,RASD2,Rhou
Cardiomyocyte Differentiation via BMP Receptors	1.45	-1.34164	0.217	BMPR2,GATA4,MYH7,MYL2,SMAD6
Pyrimidine Deoxyribonucleotides De Novo Biosynthesis I	1.45	-0.447214	0.217	AK4,AK7,AK8,AK9,RRM2
Vitamin-C Transport	1.45	1.34164	0.217	GLRX,NXN,SLC2A1,STOM,TXNRD3
N-acetylglucosamine Degradation II	1.44		0.5	AMDHD2,GNPDA1
Role of NANOG in Mammalian Embryonic Stem Cell Pluripotency	1.44	0	0.133	BMP15,BMP6,Bmp8b,BMPR2,FZD8,GATA4,LIFR,PIK3R5,RAP2B,RASD1,RASD2,SOX2,WNT2B,WNT4,WNT7A,WNT7B
Sphingosine-1-phosphate Signaling	1.44	-0.83205	0.133	ACER2,ADCY5,GNAI1,GUCY1A1,PDGFA,PIK3R5,PLCB2,PLCB4,PLCE1,PLCH2,Rhou,S1PR1,S1PR3,S1PR4,S1PR5,SMPD3
Antigen Presentation Pathway	1.43		0.179	CD74,CIITA,HLA-DQA1,HLA-DQB1,HLA-DRA,HLA-DRB5,LOC100909630/RT1-DMb
Chondroitin Sulfate Degradation (Metazoa)	1.43	2	0.25	ARSB,CEMIP,GM2A,HEXA
Extrinsic Prothrombin Activation Pathway	1.43		0.25	F3,F5,FGG,THBD
MSP-RON Signaling In Cancer Cells Pathway	1.42	1.88562	0.129	CSF2RB,ELF3,F11,HNF1A,KLK13,MET,MST1,MYC,PIK3R5,PLAUR,RAP2B,RASD1,RASD2,SFN,ST14,Tcf7,VEGFA,VEGFD
PTEN Signaling	1.42	0.57735	0.127	BMPR2,CDKN1A,FASLG,FGFR4,ITGAV,ITGAX,ITGB2,ITGB6,ITGB8,KDR,MAGI2,NTRK2,PIK3R5,PREX2,RAP2B,RASD1,RASD2,TGFBR1,TGFBR3
Pyroptosis Signaling Pathway	1.4	1.38675	0.14	GBP5,GZMA,IL18,MAPK12,NLRP6,PRKAR1B,TLR1,TLR2,TLR5,TLR6,TLR7,TLR8,TLR9
Corticotropin Releasing Hormone Signaling	1.39	-1.5	0.126	ADCY5,CACNA1D,CACNA2D2,CACNB2,CACNB4,CAMK4,CTH,FASLG,GNAI1,GUCY1A1,Gucy2g,MAPK12,NPR3,NR4A1,PRKAR1B,PRKCE,PRKCG,SHH,VEGFA
Glioblastoma Multiforme Signaling	1.39	-0.727607	0.123	CCNE1,CDKN1A,EGF,FZD8,IGF1,IGF2,MYC,PDGFA,PIK3R5,PLCB2,PLCB4,PLCE1,PLCH2,RAP2B,RASD1,RASD2,Rhou,WNT2B,WNT4,WNT7A,WNT7B
PEDF Signaling	1.39	-0.632456	0.143	ARHGAP22,FASLG,HNF1A,MAPK12,PIK3R5,PPARG,RAP2B,RASD1,RASD2,SERPINF1,SOD2,ZEB1
Caveolar-mediated Endocytosis Signaling	1.38		0.147	ACTA1,ACTC1,ACTG2,CAV1,CAVIN1,EGF,ITGAV,ITGAX,ITGB2,ITGB6,ITGB8
Glutamate Receptor Signaling	1.38	0	0.152	CAMK4,GNG13,GNG2,GRIA1,GRIA2,GRIN2C,GRIN2D,GRIN3A,GRIN3B,HOMER1
GPCR-Mediated Integration of Enteroendocrine Signaling Exemplified by an L Cell	1.38	0	0.147	ADCY5,ADRB1,GNA14,GNA15,GNAI1,GUCY1A1,PLCB2,PLCB4,PLCE1,PLCH2,PRKAR1B
Pyridoxal 5'-phosphate Salvage Pathway	1.38	-1	0.152	CDK1,DMPK,GRK5,MAK,MAP2K6,MAPK7,PIM1,PRKCE,SGK1,TTK
Regulation Of The Epithelial Mesenchymal Transition By Growth Factors Pathway	1.37	0.218218	0.12	CD40LG,CDH2,EGF,FASLG,FGF18,FGF9,FGFR4,MAP2K6,MAPK10,MAPK12,MET,MMP9,PDGFA,PIK3R5,RAP2B,RASD1,RASD2,TGFB1,TGFBR1,TNFSF10,TNFSF13,TNFSF8,ZEB1
Leptin Signaling in Obesity	1.34	0	0.145	ADCY5,GUCY1A1,LEPR,NPY,PDE3A,PIK3R5,PLCB2,PLCB4,PLCE1,PLCH2,PRKAR1B
Glioma Signaling	1.33	-1.26491	0.129	CAMK2A,CAMK4,CDKN1A,EGF,HDAC9,IDH1,IGF1,IGF2,PDGFA,PIK3R5,PRKCE,PRKCG,RAP2B,RASD1,RASD2,RBL1
Aldosterone Signaling in Epithelial Cells	1.32	0.301511	0.122	ASIC2,CRYAB,DNAJC22,HSPA12A,HSPA5,HSPB2,HSPB6,HSPB7,KCNMB4,NR3C2,PIK3R5,PIP5K1B,PLCB2,PLCB4,PLCE1,PLCH2,PRKCE,PRKCG,SASS6,SGK1
Airway Inflammation in Asthma	1.31		0.182	CCL2,IGHE,IL33,MMP9,OSM,TGFB1
Amyotrophic Lateral Sclerosis Signaling	1.31	-0.904534	0.13	CACNA1D,CACNA2D2,CACNB2,CACNB4,GPX1,GRIA1,GRIA2,GRIN2C,GRIN2D,GRIN3A,GRIN3B,IGF1,PIK3R5,VEGFA,VEGFD
Antiproliferative Role of Somatostatin Receptor 2	1.31	1	0.143	CDKN1A,CTH,GNG13,GNG2,GUCY1A1,Gucy2g,NPR3,PIK3R5,RAP2B,RASD1,RASD2
Role of MAPK Signaling in Inhibiting the Pathogenesis of Influenza	1.31	0.301511	0.143	CCL2,CCL5,MAP2K6,MAPK10,MAPK12,PLA2G1B,PLA2G2A,PLA2G2F,PLA2G4A,PLA2G4E,PLA2G7

## Sheet: Sheet1
Phagosome Formation
Agranulocyte Adhesion and Diapedesis
Complement System
Kinetochore Metaphase Signaling Pathway
Granulocyte Adhesion and Diapedesis
Breast Cancer Regulation by Stathmin1
Acute Phase Response Signaling
TREM1 Signaling
G-Protein Coupled Receptor Signaling
CREB Signaling in Neurons
Neuroinflammation Signaling Pathway
Th1 and Th2 Activation Pathway
Th1 Pathway
B Cell Development
Th2 Pathway
Actin Cytoskeleton Signaling
Hepatic Fibrosis / Hepatic Stellate Cell Activation
cAMP-mediated signaling
Estrogen-mediated S-phase Entry
Gαi Signaling
Coagulation System
Phagosome Maturation
LXR/RXR Activation
CLEAR Signaling Pathway
Crosstalk between Dendritic Cells and Natural Killer Cells
Tumor Microenvironment Pathway
Leukocyte Extravasation Signaling
Atherosclerosis Signaling
Dilated Cardiomyopathy Signaling Pathway
Sertoli Cell-Sertoli Cell Junction Signaling
FXR/RXR Activation
Iron homeostasis signaling pathway
HIF1α Signaling
MSP-RON Signaling Pathway
Role of Pattern Recognition Receptors in Recognition of Bacteria and Viruses
Colorectal Cancer Metastasis Signaling
ID1 Signaling Pathway
MSP-RON Signaling In Macrophages Pathway
SPINK1 Pancreatic Cancer Pathway
Pathogenesis of Multiple Sclerosis
Mitotic Roles of Polo-Like Kinase
Ferroptosis Signaling Pathway
Role of Osteoblasts, Osteoclasts and Chondrocytes in Rheumatoid Arthritis
IL-10 Signaling
Antigen Presentation Pathway
Axonal Guidance Signaling
Cell Cycle: G2/M DNA Damage Checkpoint Regulation
Pancreatic Adenocarcinoma Signaling
RHOGDI Signaling
Pulmonary Fibrosis Idiopathic Signaling Pathway
Germ Cell-Sertoli Cell Junction Signaling
Molecular Mechanisms of Cancer
Osteoarthritis Pathway
Cellular Effects of Sildenafil (Viagra)
IL-4 Signaling
IL-8 Signaling
Eicosanoid Signaling
Fcγ Receptor-mediated Phagocytosis in Macrophages and Monocytes
Gap Junction Signaling
Glioma Signaling
GM-CSF Signaling
Antioxidant Action of Vitamin C
Regulation of Actin-based Motility by Rho
Regulation of Cellular Mechanics by Calpain Protease
Tight Junction Signaling
Stearate Biosynthesis I (Animals)
Inhibition of Matrix Metalloproteases
Acute Myeloid Leukemia Signaling
Human Embryonic Stem Cell Pluripotency
PD-1, PD-L1 cancer immunotherapy pathway
DNA damage-induced 14-3-3σ Signaling
RAC Signaling
Role of BRCA1 in DNA Damage Response
RHOA Signaling
Gustation Pathway
LPS/IL-1 Mediated Inhibition of RXR Function
Remodeling of Epithelial Adherens Junctions
Hereditary Breast Cancer Signaling
Ovarian Cancer Signaling
PI3K Signaling in B Lymphocytes
Primary Immunodeficiency Signaling
Hepatic Cholestasis
Cyclins and Cell Cycle Regulation
Endothelin-1 Signaling
Neurovascular Coupling Signaling Pathway
Role of Macrophages, Fibroblasts and Endothelial Cells in Rheumatoid Arthritis
Bladder Cancer Signaling
Synaptic Long Term Potentiation
Hepatic Fibrosis Signaling Pathway
Glioma Invasiveness Signaling
Integrin Signaling
Adrenomedullin signaling pathway
Apelin Cardiac Fibroblast Signaling Pathway
Cardiomyocyte Differentiation via BMP Receptors
Pulmonary Healing Signaling Pathway
Role of IL-17F in Allergic Inflammatory Airway Diseases
Vitamin-C Transport
Creatine-phosphate Biosynthesis
ERK/MAPK Signaling
Virus Entry via Endocytic Pathways
Caveolar-mediated Endocytosis Signaling
Neuroprotective Role of THOP1 in Alzheimer's Disease
Signaling by Rho Family GTPases
Apelin Muscle Signaling Pathway
SNARE Signaling Pathway
Wound Healing Signaling Pathway
Calcium Signaling
Factors Promoting Cardiogenesis in Vertebrates
Macropinocytosis Signaling
IL-17 Signaling
Sperm Motility
Glioblastoma Multiforme Signaling
Role of IL-17A in Psoriasis
IL-15 Production
Paxillin Signaling
Toll-like Receptor Signaling
Apelin Endothelial Signaling Pathway
Dopamine Receptor Signaling
Gαs Signaling
Cardiac Hypertrophy Signaling
Chemokine Signaling
Opioid Signaling Pathway
Synaptogenesis Signaling Pathway
Protein Kinase A Signaling
Acetone Degradation I (to Methylglyoxal)
Cardiac Hypertrophy Signaling (Enhanced)
VEGF Signaling
TR/RXR Activation
NAD Biosynthesis from 2-amino-3-carboxymuconate Semialdehyde
Trehalose Degradation II (Trehalase)
Neuregulin Signaling
PTEN Signaling
Role of Hypercytokinemia/hyperchemokinemia in the Pathogenesis of Influenza
Sonic Hedgehog Signaling
Airway Pathology in Chronic Obstructive Pulmonary Disease
PAK Signaling
STAT3 Pathway
BMP signaling pathway
CXCR4 Signaling
Oncostatin M Signaling
Differential Regulation of Cytokine Production in Macrophages and T Helper Cells by IL-17A and IL-17F
G Protein Signaling Mediated by Tubby
Senescence Pathway
Endocannabinoid Neuronal Synapse Pathway
GABA Receptor Signaling
IL-12 Signaling and Production in Macrophages
Glucocorticoid Receptor Signaling
Neuropathic Pain Signaling In Dorsal Horn Neurons
Synaptic Long Term Depression
MIF Regulation of Innate Immunity
N-acetylglucosamine Degradation I
WNT/β-catenin Signaling
MIF-mediated Glucocorticoid Regulation
Gluconeogenesis I
N-acetylglucosamine Degradation II
Apelin Adipocyte Signaling Pathway
α-Adrenergic Signaling
NAD biosynthesis II (from tryptophan)
UDP-N-acetyl-D-galactosamine Biosynthesis II
Reelin Signaling in Neurons
Estrogen Biosynthesis
Serotonin Receptor Signaling
Differential Regulation of Cytokine Production in Intestinal Epithelial Cells by IL-17A and IL-17F
Pyrimidine Deoxyribonucleotides De Novo Biosynthesis I
Salvage Pathways of Pyrimidine Ribonucleotides
Chondroitin Sulfate Biosynthesis
Inhibition of Angiogenesis by TSP1
Dermatan Sulfate Biosynthesis (Late Stages)
nNOS Signaling in Neurons
Arginine Degradation VI (Arginase 2 Pathway)
Glycerol Degradation I
Serotonin and Melatonin Biosynthesis
Dermatan Sulfate Biosynthesis
GADD45 Signaling
G Beta Gamma Signaling
Bupropion Degradation
Circadian Rhythm Signaling
Chondroitin Sulfate Biosynthesis (Late Stages)
FAT10 Cancer Signaling Pathway
Ceramide Degradation
Chondroitin Sulfate Degradation (Metazoa)
Role of MAPK Signaling in Inhibiting the Pathogenesis of Influenza
Cardiac β-adrenergic Signaling
Oxytocin Signaling Pathway
CCR3 Signaling in Eosinophils
VDR/RXR Activation
Relaxin Signaling
Apelin Cardiomyocyte Signaling Pathway
Clathrin-mediated Endocytosis Signaling
Ephrin Receptor Signaling
14-3-3-mediated Signaling
Role of NFAT in Cardiac Hypertrophy
p38 MAPK Signaling
Thrombin Signaling
Phospholipases
tRNA Splicing
Fc Epsilon RI Signaling
GPCR-Mediated Nutrient Sensing in Enteroendocrine Cells
ERBB Signaling
GP6 Signaling Pathway
Nitric Oxide Signaling in the Cardiovascular System
FAK Signaling
P2Y Purigenic Receptor Signaling Pathway
FcγRIIB Signaling in B Lymphocytes
IL-6 Signaling
Dopamine-DARPP32 Feedback in cAMP Signaling
Role of MAPK Signaling in Promoting the Pathogenesis of Influenza
HMGB1 Signaling
Basal Cell Carcinoma Signaling
Ephrin B Signaling
Role of MAPK Signaling in the Pathogenesis of Influenza
Cysteine Biosynthesis/Homocysteine Degradation
VEGF Family Ligand-Receptor Interactions
White Adipose Tissue Browning Pathway
PPARα/RXRα Activation
Coronavirus Replication Pathway
Erythropoietin Signaling Pathway
eNOS Signaling
Notch Signaling
CDK5 Signaling
p70S6K Signaling
Gα12/13 Signaling
IL-13 Signaling Pathway
Role of Tissue Factor in Cancer
BEX2 Signaling Pathway
GNRH Signaling
Epithelial Adherens Junction Signaling
Aryl Hydrocarbon Receptor Signaling
fMLP Signaling in Neutrophils
Renin-Angiotensin Signaling
Gαq Signaling
Semaphorin Neuronal Repulsive Signaling Pathway
ILK Signaling
NF-κB Activation by Viruses
Estrogen Receptor Signaling
HOTAIR Regulatory Pathway
Agrin Interactions at Neuromuscular Junction
RAR Activation
Regulation of the Epithelial-Mesenchymal Transition Pathway
Endocannabinoid Developing Neuron Pathway
Melatonin Signaling
Netrin Signaling
Oxytocin In Brain Signaling Pathway
Cholecystokinin/Gastrin-mediated Signaling
Role of NANOG in Mammalian Embryonic Stem Cell Pluripotency
Sphingosine-1-phosphate Signaling
Extrinsic Prothrombin Activation Pathway
MSP-RON Signaling In Cancer Cells Pathway
Pyroptosis Signaling Pathway
Corticotropin Releasing Hormone Signaling
PEDF Signaling
Glutamate Receptor Signaling
GPCR-Mediated Integration of Enteroendocrine Signaling Exemplified by an L Cell
Pyridoxal 5'-phosphate Salvage Pathway
Regulation Of The Epithelial Mesenchymal Transition By Growth Factors Pathway
Leptin Signaling in Obesity
Aldosterone Signaling in Epithelial Cells
Airway Inflammation in Asthma
Amyotrophic Lateral Sclerosis Signaling
Antiproliferative Role of Somatostatin Receptor 2
