# Supplementary material for: Time-Course of Transcriptomic Change in the Lungs of F344 Rats Repeatedly Exposed to a Multiwalled Carbon Nanotube in a 2-Year Test
Source: Nanomaterials (Basel). 2023 Jul 19;13(14):2105. doi: 10.3390/nano13142105 (PMC10383707; doi:10.3390/nano13142105)
Supplement: Supplementary file 1 [file nanomaterials-13-02105-s001.zip › Table S5 Upstream regulators.xlsx]

## Sheet: TabeS5
	Table S5. Top 20 upstream regulators at each time point
	Year 0.5					Year 1					Year 2
	Upstream regulator	Molecule Type	Activation z-score	p-value of overlap		Upstream regulator	Molecule Type	Activation z-score	p-value of overlap		Upstream regulator	Molecule Type	Activation z-score	p-value of overlap
	lipopolysaccharide	chemical drug	9.547	5.76e-59		Immunoglobulin	complex	0.877	2.86e-50		lipopolysaccharide	chemical drug	8.465	3.32e-63
	CSF2	cytokine	8.691	1.66e-52		lipopolysaccharide	chemical drug	10.143	4.84e-46		TNF	cytokine	6.683	2.78e-59
	Immunoglobulin	complex	1.223	3.59e-50		IFNG	cytokine	7.222	1.35e-40		beta-estradiol	chemical - endogenous mammalian	3.463	2.42e-53
	beta-estradiol	chemical - endogenous mammalian	6.006	1.1e-44		TNF	cytokine	9.136	3.66e-40		TGFB1	growth factor	3.244	9.44e-48
	IFNG	cytokine	5.709	2.63e-42		CSF2	cytokine	8.255	1.15e-38		Immunoglobulin	complex	-0.675	2.3e-46
	TNF	cytokine	8.227	6.25e-42		IL1B	cytokine	6.221	1.82e-38		IFNG	cytokine	4.103	7.98e-46
	IL10	cytokine	0.831	2.31e-41		TGFB1	growth factor	3.422	3.48e-36		dexamethasone	chemical drug	1.507	4.11e-45
	dextran sulfate	chemical drug	2.022	9.15e-40		IL10	cytokine	-0.111	3.73e-36		IL1B	cytokine	4.682	5.56e-38
	IL6	cytokine	5.978	1.79e-38		beta-estradiol	chemical - endogenous mammalian	4.938	3.13e-35		AGT	growth factor	6.317	9.13e-38
	TGFB1	growth factor	3.228	5.25e-38		IL13	cytokine	2.663	3.44e-31		IL10	cytokine	0.631	6.93e-37
	AGT	growth factor	7.249	4.45e-36		IL6	cytokine	6.04	1.13e-30		tretinoin	chemical - endogenous mammalian	0.1	9.27e-37
	IL1B	cytokine	5.34	4.41e-35		dexamethasone	chemical drug	-1.12	5.07e-30		IL4	cytokine	4.808	1.35e-34
	dexamethasone	chemical drug	0.242	8.53e-34		IL33	cytokine	5.897	6.43e-30		IL6	cytokine	5.941	1.87e-34
	CEBPB	transcription regulator	4.732	1.71e-33		CSF1	cytokine	5.122	1.16e-28		CSF2	cytokine	7.453	2.47e-32
	IL13	cytokine	2.923	2.83e-33		dextran sulfate	chemical drug	1.455	5.86e-27		TP53	transcription regulator	0.032	3.31e-31
	aflatoxin B1	chemical - endogenous non-mammalian	6.364	3.34e-31		IL4	cytokine	5.433	1.26e-26		tetradecanoylphorbol acetate	chemical drug	5.756	5.06e-31
	tetradecanoylphorbol acetate	chemical drug	7.059	3.48e-31		aflatoxin B1	chemical - endogenous non-mammalian	5.259	3.55e-26		progesterone	chemical - endogenous mammalian	0.229	1.47e-30
	IL4	cytokine	5.96	4.9e-31		CEBPB	transcription regulator	4.515	3.35e-25		IL13	cytokine	2.828	2.06e-30
	TP53	transcription regulator	-0.464	1.22e-30		TCL1A	transcription regulator	2.433	7.67e-25		STAT3	transcription regulator	4.686	1.36e-29
	PTGER2	g-protein coupled receptor	5.822	3.59e-28		AGT	growth factor	7.484	7.93e-25		IL33	cytokine	4.973	4.68e-29
Y1
Y2
