# Supplementary material for: Time-Course of Transcriptomic Change in the Lungs of F344 Rats Repeatedly Exposed to a Multiwalled Carbon Nanotube in a 2-Year Test
Source: Nanomaterials (Basel). 2023 Jul 19;13(14):2105. doi: 10.3390/nano13142105 (PMC10383707; doi:10.3390/nano13142105)
Supplement: Supplementary file 1 [file nanomaterials-13-02105-s001.zip › Table S6 All regulator effects.xlsx]

## Sheet: S6a Year 0.5
Table S6. All significant regulator effects at each time point
Table S6a. All significant regulator effects at Year 0.5
Consistency Score	Node Total	Regulator Total	Regulators	Target Total	Target Molecules in Dataset	Disease & Function Total	Diseases & Functions	Known Regulator-Disease/Function Relationships
4.364	23	1	E. coli B5 lipopolysaccharide	21	CCL1,CCL17,Ccl2,CCL2,CCL22,CCL3L3,CCL4,Ccl7,CCR5,CXCL10,CXCL2,CXCL3,CXCL6,CYBB,IL18,IL6,PF4,SERPINE1,SPP1,THBS1,TREM1	1	Chemotaxis of leukocytes	0% (0/1)
4.025	22	1	E. coli B5 lipopolysaccharide	20	CCL1,CCL17,Ccl2,CCL2,CCL22,CCL3L3,CCL4,Ccl7,CCR5,CXCL10,CXCL2,CXCL3,CXCL6,CYBB,IL18,PF4,SERPINE1,SPP1,THBS1,TREM1	1	Chemotaxis of phagocytes	0% (0/1)
4.025	22	1	E. coli B5 lipopolysaccharide	20	CCL1,CCL17,Ccl2,CCL2,CCL22,CCL3L3,CCL4,Ccl7,CCR5,CXCL10,CXCL2,CXCL3,CXCL6,CYBB,IL18,PF4,SERPINE1,SPP1,THBS1,TREM1	1	Chemotaxis of myeloid cells	0% (0/1)
4.007	20	1	trinitrobenzenesulfonic acid	18	Ccl2,CCL3L3,CCL4,Ccl7,Ccl9,CCR5,CD44,CSF2RA,CXCL10,CXCL2,CXCL3,CXCL6,IL18,IL6,LCN2,PF4,S100A9,TAC1	1	Chemotaxis	0% (0/1)
4.007	20	1	trinitrobenzenesulfonic acid	18	Ccl2,CCL3L3,CCL4,Ccl7,Ccl9,CCR5,CD44,CSF2RA,CXCL10,CXCL2,CXCL3,CXCL6,IL18,IL6,LCN2,PF4,S100A9,TAC1	1	Homing of cells	0% (0/1)
4	27	1	MYD88	25	BATF,C3,CCL17,Ccl2,CCL2,CCL3L3,CCL4,CD44,CH25H,CXCL10,CXCL2,CXCL3,CXCL6,HCK,HP,IGF1,IL18,IL6,INHBA,MARCO,MMP14,MMP7,PTGES,SERPINE1,SPP1	1	Homing of cells	100% (1/1)
3.883	15	1	C3	13	APOE,C3AR1,C5AR1,Ccl2,CCL2,CCL3L3,CCL4,Ccl9,CXCL10,CXCL2,CXCL3,IL6,LCN2	1	Cell movement of leukocytes	100% (1/1)
3.883	15	1	C3	13	APOE,C3AR1,C5AR1,Ccl2,CCL2,CCL3L3,CCL4,Ccl9,CXCL10,CXCL2,CXCL3,IL6,LCN2	1	Recruitment of leukocytes	100% (1/1)
3.883	15	1	C3	13	APOE,C3AR1,C5AR1,Ccl2,CCL2,CCL3L3,CCL4,Ccl9,CXCL10,CXCL2,CXCL3,IL6,LCN2	1	Recruitment of blood cells	100% (1/1)
3.883	15	1	C3	13	APOE,C3AR1,C5AR1,Ccl2,CCL2,CCL3L3,CCL4,Ccl9,CXCL10,CXCL2,CXCL3,IL6,LCN2	1	Leukocyte migration	100% (1/1)
3.883	15	1	C3	13	APOE,C3AR1,C5AR1,Ccl2,CCL2,CCL3L3,CCL4,Ccl9,CXCL10,CXCL2,CXCL3,IL6,LCN2	1	Cell movement of blood cells	100% (1/1)
3.883	15	1	C3	13	APOE,C3AR1,C5AR1,Ccl2,CCL2,CCL3L3,CCL4,Ccl9,CXCL10,CXCL2,CXCL3,IL6,LCN2	1	Migration of cells	100% (1/1)
3.883	15	1	C3	13	APOE,C3AR1,C5AR1,Ccl2,CCL2,CCL3L3,CCL4,Ccl9,CXCL10,CXCL2,CXCL3,IL6,LCN2	1	Recruitment of cells	100% (1/1)
3.883	15	1	C3	13	APOE,C3AR1,C5AR1,Ccl2,CCL2,CCL3L3,CCL4,Ccl9,CXCL10,CXCL2,CXCL3,IL6,LCN2	1	Cell movement	100% (1/1)
3.881	19	1	trinitrobenzenesulfonic acid	17	Ccl2,CCL3L3,CCL4,Ccl7,CCR5,CD44,CSF2RA,CXCL10,CXCL2,CXCL3,CXCL6,IL18,IL6,LCN2,PF4,S100A9,TAC1	1	Homing of leukocytes	0% (0/1)
3.753	14	1	FCGR2A	12	CCL1,Ccl2,CCL2,CCL22,CCL4,CLEC4E,CXCL10,CXCL2,CXCL3,IL18,IL6,SERPINE1	1	Leukocyte migration	100% (1/1)
3.753	14	1	FCGR2A	12	CCL1,Ccl2,CCL2,CCL22,CCL4,CLEC4E,CXCL10,CXCL2,CXCL3,IL18,IL6,SERPINE1	1	Cell movement of blood cells	100% (1/1)
3.753	14	1	C3	12	APOE,C3AR1,C5AR1,Ccl2,CCL2,CCL3L3,CCL4,CXCL10,CXCL2,CXCL3,IL6,LCN2	1	Recruitment of myeloid cells	100% (1/1)
3.75	18	1	TLR3	16	C3,CCL1,CCL17,Ccl2,CCL2,CCL3L3,CCL4,Ccl7,CXCL10,CXCL2,CXCL3,LCN2,PLAU,PTGES,SERPINE1,TREM1	1	Chemotaxis of myeloid cells	0% (0/1)
3.742	16	1	trinitrobenzenesulfonic acid	14	Ccl2,CCL3L3,CCL4,Ccl9,CCR5,CD44,CXCL10,CXCL3,CXCL6,IL18,IL6,MMP12,PF4,TAC1	1	Cell movement of mononuclear leukocytes	100% (1/1)
3.742	16	1	trinitrobenzenesulfonic acid	14	Ccl2,CCL3L3,CCL4,Ccl7,Ccl9,CCR5,CD44,CXCL10,CXCL3,CXCL6,IL18,IL6,PF4,TAC1	1	Cell movement of lymphatic system cells	100% (1/1)
3.671	21	1	trinitrobenzenesulfonic acid	19	Ccl2,CCL3L3,CCL4,Ccl9,CCR5,CD44,CLEC4D,CLEC4E,CXCL10,CXCL2,CXCL3,CXCL6,IL18,IL6,LCN2,PF4,S100A9,TAC1,TBX21	1	Activation of cells	100% (1/1)
3.624	24	1	TLR4	22	C3,CCL1,Ccl2,CCL2,CCL3L3,CCL4,CCR5,CD14,CD200R1,CD44,CD80,CD86,CXCL10,CXCL2,CXCL3,F3,FCGR2B,IL18,IL6,MARCO,RGS1,SPP1	1	Interaction of leukocytes	100% (1/1)
3.618	13	1	FCGR2A	11	Ccl2,CCL2,CCL22,CCL4,CLEC4E,CXCL10,CXCL2,CXCL3,IL18,IL6,SERPINE1	1	Recruitment of phagocytes	100% (1/1)
3.606	15	1	TLR9	13	CCL17,Ccl2,CCL3L3,CCL4,Ccl7,CXCL10,CXCL2,CXCL3,CXCL6,IL18,IL6,LCN2,SERPINE1	1	Chemotaxis of leukocytes	0% (0/1)
3.606	15	1	Ccl2	13	CCL3L3,CCL4,Ccl7,Ccl9,CCR5,CXCL10,CXCL2,CXCL3,CYBB,IGF1,IL6,KDR,SPP1	1	Chemotaxis	100% (1/1)
3.606	15	1	trinitrobenzenesulfonic acid	13	Ccl2,CCL3L3,CCL4,Ccl9,CCR5,CD44,CXCL10,CXCL3,CXCL6,IL18,IL6,PF4,TAC1	1	Cell movement of lymphocytes	100% (1/1)
3.536	20	1	salmonella minnesota R595 lipopolysaccharides	18	Ccl2,CCL2,CCL22,CCL3L3,CCL4,CD80,CD83,CD86,CXCL10,CXCL2,CXCL3,CXCL6,HLA-DQA1,HLA-DRA,IL6,SERPINE1,SLC7A2,Tnfsf9	1	Activation of cells	100% (1/1)
3.5	18	1	TNFSF12	16	Ccl2,CCL2,CCL3L3,Ccl7,CCR5,CLEC4E,CSF2RA,CXCL10,CXCL2,CXCL3,CXCL6,IL6,PF4,PPARGC1A,PTX3,S100A9	1	Inflammatory response	100% (1/1)
3.5	18	1	SP600125	16	APOE,Ccl2,CCL2,CCL4,CXCL10,CXCL2,CXCL3,CXCL6,IL18,IL6,INHBA,PTGES,SERPINE1,SPP1,THBS1,THBS2	1	Chemotaxis of leukocytes	0% (0/1)
3.5	18	1	trinitrobenzenesulfonic acid	16	Ccl2,CCL4,CCR5,CD44,CLEC4D,CLEC4E,CXCL10,CXCL3,CXCL6,IL18,IL6,LCN2,PF4,S100A9,TAC1,TBX21	1	Activation of leukocytes	100% (1/1)
3.5	18	1	trinitrobenzenesulfonic acid	16	Ccl2,CCL4,CCR5,CD44,CLEC4D,CLEC4E,CXCL10,CXCL3,CXCL6,IL18,IL6,LCN2,PF4,S100A9,TAC1,TBX21	1	Activation of blood cells	100% (1/1)
3.479	12	1	FCGR2A	10	CCL1,Ccl2,CCL2,CCL22,CCL4,CLEC4E,CXCL10,CXCL3,IL18,IL6	1	Activation of myeloid cells	100% (1/1)
3.479	12	1	C3	10	APOE,C1QA,C3AR1,C5AR1,Ccl2,CCL2,CXCL10,CXCL3,IL6,LCN2	1	Immune response of cells	100% (1/1)
3.474	16	1	enterotoxin B	14	CCL17,Ccl2,CCL2,CCL22,CCL3L3,CCL4,Ccl7,Ccl9,CSF2RB,CXCL10,CXCL2,CXCL3,CXCL6,IL6	1	Recruitment of leukocytes	0% (0/1)
3.474	16	1	enterotoxin B	14	CCL17,Ccl2,CCL2,CCL22,CCL3L3,CCL4,Ccl9,CD80,CSF2RB,CXCL10,CXCL2,CXCL3,CXCL6,IL6	1	Migration of phagocytes	0% (0/1)
3.464	14	1	immethridine	12	BTK,C3,C5AR1,Ccl2,CD14,CD44,CTSS,CXCL3,FCGR1A,IL6,LCN2,SIGLEC1	1	Immune response of cells	0% (0/1)
3.464	14	1	MAPKAPK2	12	Ccl2,CCL2,CCL3L3,CXCL10,CXCL2,CXCL3,IL18,IL6,MARCO,MRC1,MSR1,PLAU	1	Binding of leukocytes	0% (0/1)
3.464	14	1	MAPKAPK2	12	Ccl2,CCL2,CCL3L3,CXCL10,CXCL2,CXCL3,IL18,IL6,MARCO,MRC1,MSR1,PLAU	1	Interaction of leukocytes	0% (0/1)
3.464	14	1	MAPKAPK2	12	Ccl2,CCL2,CCL3L3,CXCL10,CXCL2,CXCL3,IL18,IL6,MARCO,MRC1,MSR1,PLAU	1	Adhesion of blood cells	0% (0/1)
3.464	14	1	Pdgf (complex)	12	CAV1,Ccl2,CCL2,CD44,CXCL3,F3,HMOX1,INHBA,NOG,PLAU,PLAUR,SERPINE1	1	Cell movement of myeloid cells	100% (1/1)
3.464	14	1	E. coli lipopolysaccharide	12	Ccl2,CCL2,CD80,CD83,CD86,CXCL10,CXCL3,FOXP3,IL18,IL6,S100A9,TREM1	1	Leukopoiesis	100% (1/1)
3.464	14	1	MAPKAPK2	12	Ccl2,CCL2,CCL3L3,CXCL10,CXCL2,CXCL3,IL18,IL6,MARCO,MRC1,MSR1,PLAU	1	Binding of blood cells	0% (0/1)
3.464	14	1	MAPKAPK2	12	Ccl2,CCL2,CCL3L3,CXCL10,CXCL2,CXCL3,IL18,IL6,MARCO,MRC1,MSR1,PLAU	1	Interaction of blood cells	0% (0/1)
3.464	14	1	enterotoxin B	12	CCL17,Ccl2,CCL2,CCL22,CCL3L3,CCL4,CD80,CSF2RB,CXCL10,CXCL2,CXCL3,IL6	1	Adhesion of blood cells	0% (0/1)
3.464	14	1	C3	12	APOE,C3AR1,C5AR1,Ccl2,CCL2,CCL3L3,CCL4,CXCL10,CXCL2,CXCL3,IL6,LCN2	1	Recruitment of granulocytes	100% (1/1)
3.357	17	1	EGF	15	CCL17,Ccl2,CCL2,CD44,CXCL2,CXCL6,F3,HMOX1,IGFBP3,IL6,PLAU,PLAUR,S100A9,SERPINE1,SPP1	1	Migration of myeloid cells	0% (0/1)
3.357	17	1	MAP2K1	15	APOE,CCL2,CCL3L3,CCL4,CD44,CXCL3,IL6,LGALS3,MMP12,MMP14,OSM,PLAUR,SERPINE2,THBS1,TNFSF10	1	Cell movement of mononuclear leukocytes	0% (0/1)
3.333	11	1	C3	9	APOE,C3AR1,C5AR1,Ccl2,CCL2,CXCL10,CXCL3,IL6,LCN2	1	Immune response of leukocytes	100% (1/1)
3.328	15	1	N-acetylmuramyl-L-alanyl-D-isoglutamine	13	CCL17,Ccl2,CCL2,CCL4,Ccl7,CXCL11,CXCL2,CXCL3,CXCL6,IL6,ITGB2,MSR1,TREM1	1	Inflammatory response	100% (1/1)
3.328	15	1	lipid A	13	C3,Ccl2,CCL2,CD14,CD86,CXCL10,CXCL3,FCGR1A,FCGR2B,IL6,MARCO,MSR1,THBS1	1	Immune response of cells	0% (0/1)
3.328	15	1	Tlr	13	ARG1,Ccl2,CCL2,CD80,CD83,CD86,CXCL10,CXCL3,IL6,IRF4,PAX5,TNFSF13,TREM1	1	Leukopoiesis	100% (1/1)
3.328	15	1	pyrrolidine dithiocarbamate	13	Ccl2,CCL2,CCR5,CXCL10,CXCL2,CXCL3,CXCL6,IGF1,IL6,MMP14,MMP7,SERPINE1,SFTPA1	1	Chemotaxis	0% (0/1)
3.317	13	1	trinitrobenzenesulfonic acid	11	CALCB,CCL3L3,CCL4,Ccl9,CCR5,CD44,CXCL10,CXCL2,CXCL3,CXCL6,TAC1	1	Mobilization of Ca2+	0% (0/1)
3.317	13	1	Pdgf (complex)	11	CAV1,Ccl2,CCL2,CD44,CXCL3,HMOX1,INHBA,NOG,PLAU,PLAUR,SERPINE1	1	Cell movement of phagocytes	100% (1/1)
3.317	13	1	trinitrobenzenesulfonic acid	11	CCL4,CCR5,CD44,CLEC4E,CXCL2,IL18,IL1R2,IL6,LCN2,NCF4,TAC1	1	Metabolism of reactive oxygen species	0% (0/1)
3.317	13	1	trinitrobenzenesulfonic acid	11	CCL4,CCR5,CD44,CLEC4E,CXCL2,IL18,IL1R2,IL6,LCN2,NCF4,TAC1	1	Synthesis of reactive oxygen species	0% (0/1)
3.3	20	1	E. coli B5 lipopolysaccharide	18	CCL17,Ccl2,CCL2,CCL22,CCL3L3,CCL4,Ccl9,CCR5,CCR8,CD44,CD86,CXCL10,CXCL3,CYBB,HMOX1,IL18,SERPINE1,SPP1	1	Migration of antigen presenting cells	0% (0/1)
3.25	18	1	ERK	16	CAV1,Ccl2,CCL2,CCL4,Ccl7,CXCL10,CXCL2,CXCL6,IL6,ITGB2,LCN2,MMP14,PLAU,PTGES,SERPINE1,THBS1	1	Chemotaxis	100% (1/1)
3.207	16	1	peptidoglycan	14	Ccl2,CCL2,CCL3L3,CCL4,CCR5,CCR8,CXCL10,CXCL2,CXCL3,CXCL6,IL18,IL6,ITGB2,S100A9	1	Chemotaxis	100% (1/1)
3.207	16	1	TLR2	14	Ccl2,CCL2,CCL3L3,CCL4,CCR5,CSF2RA,CXCL10,CXCL2,CXCL3,CXCL6,CYBB,IL18,IL6,TREM1	1	Chemotaxis of leukocytes	100% (1/1)
3.207	16	1	CCN1	14	C3,Ccl2,CCL2,CCL3L3,CCL4,Ccl7,CXCL10,CXCL2,CXCL3,IL18,IL6,KDR,PLAU,SERPINE1	1	Chemotaxis	100% (1/1)
3.207	16	1	TICAM1	14	Ccl2,CCL2,CCL3L3,CCL4,CH25H,CXCL10,CXCL11,CXCL2,CXCL3,CXCL6,IL18,IL6,SERPINE1,TREM1	1	Chemotaxis of leukocytes	0% (0/1)
3.207	16	1	TICAM1	14	Ccl2,CCL2,CCL3L3,CCL4,CH25H,CXCL10,CXCL11,CXCL2,CXCL3,CXCL6,IL18,IL6,SERPINE1,TREM1	1	Homing of leukocytes	0% (0/1)
3.207	16	1	EGF	14	CCL17,Ccl2,CCL2,CD44,CXCL2,CXCL6,F3,IGFBP3,IL6,PLAU,PLAUR,S100A9,SERPINE1,SPP1	1	Migration of granulocytes	0% (0/1)
3.207	16	1	MAP2K1	14	APOE,CCL2,CCL3L3,CCL4,CD44,CXCL3,F3,IL6,LGALS3,MITF,OSM,PLAUR,SERPINA1,THBS1	1	Adhesion of immune cells	100% (1/1)
3.182	10	1	LGALS3	8	Ccl2,CCL2,CCL3L3,CXCL2,CXCL3,IL6,MSR1,SPP1	1	Adhesion of immune cells	100% (1/1)
3.182	10	1	LGALS3	8	Ccl2,CCL2,CCL3L3,CXCL2,CXCL3,IL6,MSR1,SPP1	1	Interaction of leukocytes	100% (1/1)
3.182	10	1	LGALS3	8	Ccl2,CCL2,CCL3L3,CXCL2,CXCL3,IL6,MSR1,SPP1	1	Adhesion of blood cells	100% (1/1)
3.182	10	1	CLEC4E	8	AREG,Ccl2,CCL3L3,CCL4,CLEC5A,CXCL2,CXCL3,IL6	1	Leukocyte migration	100% (1/1)
3.182	10	1	CLEC4E	8	AREG,Ccl2,CCL3L3,CCL4,CLEC5A,CXCL2,CXCL3,IL6	1	Cellular infiltration by blood cells	100% (1/1)
3.182	10	1	CLEC4E	8	AREG,Ccl2,CCL3L3,CCL4,CLEC5A,CXCL2,CXCL3,IL6	1	Cellular infiltration	100% (1/1)
3.182	10	1	AREG	8	CCNA2,CCNB1,CCNF,EREG,IL6,MKI67,MYBL2,PLAU	1	Proliferation of connective tissue cells	100% (1/1)
3.182	10	1	Ccl2	8	CCL4,CD14,CXCL10,CXCL3,CYBB,IGF1,IL6,SPP1	1	Activation of phagocytes	100% (1/1)
3.182	10	1	Ccl2	8	CCL3L3,CCL4,Ccl9,CCR5,CXCL10,CXCL3,IL6,SPP1	1	Migration of mononuclear leukocytes	100% (1/1)
3.182	10	1	Ccl2	8	CCL3L3,CCL4,Ccl9,CCR5,CXCL10,CXCL3,IL6,SPP1	1	Migration of lymphatic system cells	100% (1/1)
3.182	10	1	Ccl2	8	CCL3L3,CCL4,Ccl9,CCR5,CXCL10,CXCL3,IL6,SPP1	1	Lymphocyte migration	100% (1/1)
3.182	10	1	AREG	8	CCNA2,CCNB1,CCNF,EREG,IL6,MKI67,MYBL2,PLAU	1	Growth of connective tissue	100% (1/1)
3.175	14	1	troglitazone	12	C3,Ccl2,CCL2,CXCL10,CXCL11,CXCL3,CXCL6,HP,IL6,PTGES,SERPINE1,SPP1	1	Chemotaxis of leukocytes	100% (1/1)
3.175	14	1	estriol	12	CCL1,Ccl2,CCL2,CCL3L3,CCL4,Ccl7,CXCL10,CXCL2,CXCL3,CXCL6,IL6,ITGB2	1	Chemotaxis of leukocytes	0% (0/1)
3.175	14	1	estriol	12	CCL1,Ccl2,CCL2,CCL3L3,CCL4,Ccl7,CXCL10,CXCL2,CXCL3,CXCL6,IL6,ITGB2	1	Homing of leukocytes	0% (0/1)
3.175	14	1	F2	12	Ccl2,CCL2,Ccl9,CD44,CXCL10,CXCL3,CYBB,HMOX1,IL6,KDR,PLAUR,SERPINE1	1	Migration of phagocytes	100% (1/1)
3.175	14	1	lysophosphatidic acid	12	Ccl2,CCL2,CCL4,CD14,CXCL10,CXCL2,CXCL3,F3,IL6,KDR,MPZ,SERPINE1	1	Recruitment of phagocytes	100% (1/1)
3.175	14	1	lysophosphatidic acid	12	Ccl2,CCL2,CCL4,CD14,CXCL10,CXCL2,CXCL3,F3,IL6,KDR,MPZ,SERPINE1	1	Recruitment of myeloid cells	100% (1/1)
3.175	14	1	TNFSF11	12	Ccl2,CCL2,CCL3L3,CCL4,CD44,CXCL3,F3,HCK,IL6,PLAUR,SERPINE1,SPP1	1	Migration of granulocytes	0% (0/1)
3.175	14	1	FN1	12	APOE,CCL2,CCL4,CXCL2,CXCL3,IL6,MMP14,PLAU,PLAUR,SERPINE1,SPP1,THBS1	1	Chemotaxis	100% (1/1)
3.175	14	1	N-acetyl-L-cysteine	12	C3,Ccl2,CCL2,CCR5,CXCL10,CXCL3,CYBB,IL6,PLAU,PLAUR,SERPINE1,SPP1	1	Chemotaxis of leukocytes	0% (0/1)
3.175	14	1	palmitic acid	12	Ccl2,CCL2,CCL3L3,CCL4,CXCL10,CXCL2,CXCL3,CYBB,IL6,INHBA,LCN2,SERPINE1	1	Chemotaxis of leukocytes	0% (0/1)
3.175	14	1	INSIG1	12	APOE,CCL17,CCL22,CCR5,CXCL10,CXCL3,CXCL6,DLK1,FABP5,IL6,PLA2G7,PTGES	1	Cell movement of mononuclear leukocytes	0% (0/1)
3.175	14	1	CCL5	12	Ccl2,CCL2,CCL3L3,CCL4,CCR5,CD44,CXCL2,CXCL3,IL6,OLR1,PLAUR,THBS1	1	Adhesion of immune cells	100% (1/1)
3.175	14	1	CCL5	12	Ccl2,CCL2,CCL3L3,CCL4,CCR5,CD44,CXCL2,CXCL3,IL6,OLR1,PLAUR,THBS1	1	Adhesion of blood cells	100% (1/1)
3.162	12	1	RETNLB	10	Ccl2,CCL2,CCL3L3,Ccl9,CCR5,CD86,IGF1,IL6,Retnla,UBE2C	1	Activation of cells	0% (0/1)
3.162	12	1	PTGS2	10	Ccl2,CCL2,CCL3L3,CCL4,CD44,CXCL10,CXCL3,DLK1,IL6,MMP14	1	Migration of mononuclear leukocytes	100% (1/1)
3.162	12	1	Go 6976	10	Ccl2,CCL4,CXCL10,CXCL2,CXCL3,CXCL6,CYBB,HMOX1,IL6,TNFRSF9	1	Migration of phagocytes	0% (0/1)
3.162	12	1	SRC	10	CAV1,CCL2,CCNE1,CDK1,CTSB,IL6,PLAU,PLAUR,SLC2A1,SPP1	1	Proliferation of connective tissue cells	100% (1/1)
3.162	12	1	HMGB1	10	CCL2,CCL4,CD80,CD83,CD86,CXCL3,CXCL6,IL6,IRF5,PTGES	1	Activation of leukocytes	100% (1/1)
3.162	12	1	TLR7	10	Ccl2,CCL2,CCL4,Ccl7,CD44,CXCL10,CXCL2,CXCL3,IL6,PLAU	1	Chemotaxis	0% (0/1)
3.162	12	1	TLR7	10	Ccl2,CCL2,CCL4,Ccl7,CD44,CXCL10,CXCL2,CXCL3,IL6,PLAU	1	Homing of leukocytes	0% (0/1)
3.162	12	1	BID	10	C3AR1,C5AR1,Ccl2,CTSB,CTSH,CTSK,CTSS,IL6,ITGAX,MMP12	1	Migration of cells	100% (1/1)
3.162	12	1	PRKD1	10	Ccl2,CCL3L3,CCL4,CXCL10,CXCL2,CXCL3,CXCL6,F3,IL6,KDR	1	Recruitment of phagocytes	0% (0/1)
3.162	12	1	PRKD1	10	Ccl2,CCL3L3,CCL4,CD86,CXCL10,CXCL2,CXCL3,F3,IL6,KDR	1	Binding of leukocytes	0% (0/1)
3.162	12	1	PRKD1	10	Ccl2,CCL3L3,CCL4,CD86,CXCL10,CXCL2,CXCL3,F3,IL6,KDR	1	Interaction of leukocytes	0% (0/1)
3.162	12	1	PRKD1	10	Ccl2,CCL3L3,CCL4,CD86,CXCL10,CXCL2,CXCL3,F3,IL6,KDR	1	Adhesion of blood cells	0% (0/1)
3.162	12	1	PRKD1	10	Ccl2,CCL3L3,CCL4,CXCL10,CXCL2,CXCL3,CXCL6,F3,IL6,KDR	1	Recruitment of myeloid cells	0% (0/1)
3.162	12	1	uric acid	10	Ccl2,CCL2,CCL3L3,CCL4,CD80,CD86,CXCL2,CXCL3,IL18,IL6	1	Adhesion of immune cells	100% (1/1)
3.162	12	1	uric acid	10	Ccl2,CCL2,CCL3L3,CCL4,CD80,CD86,CXCL2,CXCL3,IL18,IL6	1	Interaction of leukocytes	100% (1/1)
3.162	12	1	uric acid	10	Ccl2,CCL2,CCL3L3,CCL4,CD80,CD86,CXCL2,CXCL3,IL18,IL6	1	Adhesion of blood cells	100% (1/1)
3.162	12	1	FCGR2A	10	CCL1,Ccl2,CCL2,CCL22,CLEC4E,CXCL10,CXCL2,CXCL3,IL18,IL6	1	Accumulation of cells	100% (1/1)
3.162	12	1	C3	10	C3AR1,C5AR1,Ccl2,CCL2,CCL3L3,CCL4,CXCL10,CXCL2,CXCL3,LCN2	1	Chemotaxis of granulocytes	100% (1/1)
3.162	12	1	lipid A	10	C3,Ccl2,CD14,CXCL10,FCGR1A,FCGR2B,IL6,MARCO,MSR1,THBS1	1	Phagocytosis	0% (0/1)
3.153	19	1	CEBPA	17	C3,C3AR1,CCL4,CSF2RA,HP,IL6,LCN2,LITAF,S100A9,SERPINE1,SFTPA1,SFTPD,SPI1,SPP1,TAC1,THBS1,TIAM1	1	Homing of leukocytes	0% (0/1)
3.153	19	1	bleomycin	17	APOE,C3,CCL17,Ccl2,CCL2,CCL22,CCL3L3,CCR5,CXCL10,CXCL2,CXCL3,IL18,IL6,LGALS3,SERPINE1,SPP1,THBS1	1	Chemotaxis of leukocytes	0% (0/1)
3.098	17	1	CD44	15	Ccl2,CCL4,CCR5,CXCL6,IL6,ITGAX,LGALS3,Ly6a (includes others),MMP12,MMP14,PLAU,SPP1,THBS1,THBS2,TIAM1	1	Cell movement of mononuclear leukocytes	100% (1/1)
3.024	9	1	TAC1	7	Ccl2,CCL2,CCL4,CXCL10,CXCL3,IL6,SERPINE1	1	Chemotaxis of leukocytes	100% (1/1)
3.024	9	1	TAC1	7	Ccl2,CCL2,CCL4,CXCL10,CXCL3,IL6,SERPINE1	1	Homing of leukocytes	100% (1/1)
3.024	9	1	TLR8	7	CCL1,Ccl2,CCL2,CCL4,CXCL10,CXCL2,IL6	1	Inflammatory response	100% (1/1)
3.024	9	1	AREG	7	CCNA2,CCNB1,CCNF,EREG,IL6,MYBL2,PLAU	1	Cell proliferation of fibroblasts	100% (1/1)
3.024	9	1	FCGR2A	7	CCL1,CCL2,CCL22,CCL4,CXCL10,CXCL3,IL6	1	Quantity of metal	100% (1/1)
3.015	13	1	lysophosphatidylcholine	11	Ccl2,CCL2,CCL3L3,CD74,CYBB,IL6,OLR1,PLAU,PLAUR,SERPINE1,TNFRSF9	1	Inflammatory response	100% (1/1)
3.015	13	1	Fcer1	11	CCL1,Ccl2,CCL2,CCL3L3,CCL4,Ccl7,Ccl9,CD4,CXCL3,IL6,INHBA	1	Chemotaxis	100% (1/1)
3.015	13	1	S100A9	11	BHLHE40,C3,Ccl2,CSF2RB,CTLA4,CXCL10,FCGR2A,IGF1,IL6,TNFRSF4,TNFRSF9	1	Activation of lymphocytes	100% (1/1)
3.015	13	1	S100A9	11	BHLHE40,C3,Ccl2,CSF2RB,CTLA4,CXCL10,FCGR2A,IGF1,IL6,TNFRSF4,TNFRSF9	1	Activation of lymphoid cells	100% (1/1)
3.015	13	1	BHLHE40	11	C3AR1,CAPG,CD14,CSF2RB,FCGR2B,GLRX,MARCO,MSR1,PF4,SLAMF7,TNFRSF9	1	Engulfment of phagocytes	0% (0/1)
3.015	13	1	BHLHE40	11	C3AR1,CAPG,CD14,CSF2RB,FCGR2B,GLRX,MARCO,MSR1,PF4,SLAMF7,TNFRSF9	1	Engulfment of myeloid cells	0% (0/1)
3.015	13	1	BHLHE40	11	C3AR1,CAPG,CD14,CSF2RB,FCGR2B,GLRX,MARCO,MSR1,PF4,SLAMF7,TNFRSF9	1	Engulfment of blood cells	0% (0/1)
3.015	13	1	immethridine	11	BTK,C3,C5AR1,CCR5,CD14,CD44,CXCL3,FCGR1A,IL6,LCN2,SIGLEC1	1	Response of phagocytes	0% (0/1)
3.015	13	1	Tlr	11	ARG1,CCL2,CD80,CD83,CD86,CXCL10,IL6,IRF4,PAX5,TNFSF13,TREM1	1	Hematopoiesis of mononuclear leukocytes	100% (1/1)
3.015	13	1	E. coli lipopolysaccharide	11	Ccl2,CCL2,CCL22,CD80,CD86,CXCL10,CXCL2,CXCL3,IL18,IL6,S100A9	1	Accumulation of blood cells	100% (1/1)
3.015	13	1	E. coli lipopolysaccharide	11	Ccl2,CCL2,CCL22,CD80,CD86,CXCL10,CXCL2,CXCL3,IL18,IL6,S100A9	1	Accumulation of leukocytes	100% (1/1)
3.015	13	1	S100A9	11	BHLHE40,C3,Ccl2,CSF2RB,CTLA4,CXCL10,FCGR2A,IGF1,IL6,TNFRSF4,TNFRSF9	1	Activation of mononuclear leukocytes	100% (1/1)
3.015	13	1	salmonella minnesota R595 lipopolysaccharides	11	Ccl2,CCL2,CCL22,CCL4,CD80,CD83,CD86,CXCL10,HLA-DRA,IL6,Tnfsf9	1	Activation of mononuclear leukocytes	0% (0/1)
3.015	13	1	BHLHE40	11	C3AR1,CAPG,CD14,CSF2RB,FCGR2B,GLRX,MARCO,MSR1,PF4,SLAMF7,TNFRSF9	1	Engulfment of leukocytes	0% (0/1)
3	11	1	CISH	9	CCL3L3,CCL4,CD14,CXCL10,CXCL3,OLR1,OSM,PLAUR,SPP1	1	Binding of leukocytes	0% (0/1)
3	11	1	CISH	9	CCL3L3,CCL4,CD14,CXCL10,CXCL3,OLR1,OSM,PLAUR,SPP1	1	Interaction of leukocytes	0% (0/1)
3	11	1	CISH	9	CCL3L3,CCL4,CD14,CXCL10,CXCL3,OLR1,OSM,PLAUR,SPP1	1	Adhesion of blood cells	0% (0/1)
3	11	1	CD36	9	CCL1,Ccl2,CXCL3,CXCL6,IL6,MMP14,PLAU,PLAUR,SERPINE1	1	Chemotaxis	100% (1/1)
3	11	1	SOCS1	9	ARG1,Ccl2,CCL2,CD44,CD86,CXCL10,IL6,Retnla,VAV1	1	Activation of phagocytes	100% (1/1)
3	11	1	SOCS1	9	ARG1,Ccl2,CCL2,CD44,CD86,CXCL10,IL6,Retnla,VAV1	1	Activation of myeloid cells	100% (1/1)
3	11	1	fingolimod	9	CCL1,CCL17,Ccl2,CCL2,CCL4,Ccl7,CXCL10,CXCL2,SERPINE1	1	Chemotaxis of phagocytes	0% (0/1)
3	11	1	fingolimod	9	CCL1,CCL17,Ccl2,CCL2,CCL4,Ccl7,CXCL10,CXCL2,SERPINE1	1	Chemotaxis of myeloid cells	0% (0/1)
3	11	1	D-fructose	9	Ccl2,Ccl7,CXCL10,CXCL2,FABP4,FASN,HP,IL6,THBS1	1	Cell movement of leukocytes	0% (0/1)
3	11	1	D-fructose	9	Ccl2,Ccl7,CXCL10,CXCL2,FABP4,FASN,HP,IL6,THBS1	1	Cell movement of blood cells	0% (0/1)
3	11	1	collagenase	9	Ccl2,CCL3L3,CCL4,Ccl7,CXCL10,CXCL2,CXCL3,CXCL6,IL6	1	Chemotaxis of leukocytes	0% (0/1)
3	11	1	collagenase	9	Ccl2,CCL3L3,CCL4,Ccl7,CXCL10,CXCL2,CXCL3,CXCL6,IL6	1	Homing of leukocytes	0% (0/1)
3	11	1	IFIH1	9	Ccl2,CCL2,CCL4,CD4,CXCL10,CXCL2,CXCL3,IL6,Ly6a (includes others)	1	Cell movement of leukocytes	0% (0/1)
3	11	1	IFIH1	9	Ccl2,CCL2,CCL4,CD4,CXCL10,CXCL2,CXCL3,IL6,Ly6a (includes others)	1	Cell movement of blood cells	0% (0/1)
3	11	1	IFIH1	9	Ccl2,CCL2,CCL4,CD4,CXCL10,CXCL2,CXCL3,IL6,Ly6a (includes others)	1	Binding of leukocytes	0% (0/1)
3	11	1	IFIH1	9	Ccl2,CCL2,CCL4,CD4,CXCL10,CXCL2,CXCL3,IL6,Ly6a (includes others)	1	Interaction of leukocytes	0% (0/1)
3	11	1	IFIH1	9	Ccl2,CCL2,CCL4,CD4,CXCL10,CXCL2,CXCL3,IL6,Ly6a (includes others)	1	Adhesion of blood cells	0% (0/1)
3	11	1	Salmonella enterica serotype abortus equi lipopolysaccharide	9	Ccl2,CCL3L3,CCL4,CXCL2,CXCL3,IL18,INHBA,PLAU,THBS1	1	Chemotaxis of phagocytes	0% (0/1)
3	11	1	Salmonella enterica serotype abortus equi lipopolysaccharide	9	Ccl2,CCL3L3,CCL4,CXCL2,CXCL3,IL18,INHBA,PLAU,THBS1	1	Chemotaxis of myeloid cells	0% (0/1)
3	11	1	TNFSF13B	9	CCL2,CCL4,CD74,CXCL6,INHBA,PLAUR,S100B,SPP1,THBS1	1	Chemotaxis of myeloid cells	0% (0/1)
3	11	1	PSMB11	9	Ccl2,CTSS,CXCL3,CXCL6,HMOX1,LGALS3,PIK3R5,PLCB2,VAV1	1	Migration of myeloid cells	0% (0/1)
3	11	1	CCR5	9	Ccl2,CCL3L3,CCL4,CXCL10,CXCL2,CXCL3,F3,IL6,SERPINA1	1	Cell movement of leukocytes	100% (1/1)
3	11	1	CCR5	9	Ccl2,CCL3L3,CCL4,CXCL10,CXCL2,CXCL3,F3,IL6,SERPINA1	1	Cell movement of myeloid cells	100% (1/1)
3	11	1	CCR5	9	Ccl2,CCL3L3,CCL4,CXCL10,CXCL2,CXCL3,F3,IL6,SERPINA1	1	Interaction of leukocytes	100% (1/1)
3	18	1	poly rI:rC-RNA	16	C3,Ccl2,CD14,CD44,CXCL10,FCGR1A,FCGR2B,IL6,MARCO,MSR1,P2RY6,PLAU,PLAUR,SFTPD,THBS1,TLR1	1	Phagocytosis	100% (1/1)
3	11	1	E. coli B4 lipopolysaccharide	9	Ccl2,CXCL10,FCGR1A,HMOX1,IL6,LCN2,MRC1,NCF1,PLAUR	1	Phagocytosis	100% (1/1)
3	11	1	hemozoin	9	Ccl2,CCL2,CCL3L3,CCL4,CCR5,CXCL2,CXCL3,IL6,S100A9	1	Chemotaxis of leukocytes	0% (0/1)
3	11	1	hemozoin	9	Ccl2,CCL2,CCL3L3,CCL4,CCR5,CXCL2,CXCL3,IL6,S100A9	1	Homing of leukocytes	0% (0/1)
3	11	1	triamterene	9	CD14,CD44,ELF3,FCGR2A,IL6,LCN2,LGALS3,MRC1,STING1	1	Immune response of cells	0% (0/1)
3	11	1	ERK1/2	9	C3,CCL2,CCL22,CCL4,CXCL3,CXCL6,IL6,SPP1,TAC1	1	Activation of granulocytes	100% (1/1)
3	11	1	CNTF	9	C3AR1,C5AR1,Ccl2,CCR5,CD14,HMOX1,MSR1,PF4,VAV1	1	Response of mononuclear leukocytes	0% (0/1)
3	11	1	CORT	9	Ccl2,CCL3L3,CCL4,Ccl7,CCR5,CXCL10,CXCL3,IL18,IL6	1	Chemotaxis of leukocytes	0% (0/1)
3	11	1	CORT	9	Ccl2,CCL3L3,CCL4,Ccl7,CCR5,CXCL10,CXCL3,IL18,IL6	1	Homing of leukocytes	0% (0/1)
3	18	1	ZFP36	16	CCL3L3,CTSS,CXCL2,CXCL3,CYBB,IL6,KIF14,LCN2,OSM,PBK,PIM1,PLAU,PLAUR,PRC1,S100A9,SPP1	1	Migration of cells	0% (0/1)
3	11	1	FKBP10	9	CCL17,CHI3L1,INHBA,LBP,MMP12,MMP14,SERPINE1,SPP1,TAC1	1	Leukocyte migration	0% (0/1)
3	11	1	ozone	9	Ccl2,CCL3L3,CXCL10,CXCL2,CXCL3,HMOX1,IL6,MMP12,SPP1	1	Migration of phagocytes	0% (0/1)
3	11	1	C1QA	9	C3,C4A/C4B,C5AR1,Ccl2,CD44,CD80,CXCL10,IL6,LCN2	1	Activation of phagocytes	0% (0/1)
3	11	1	C1QA	9	C3,C4A/C4B,C5AR1,Ccl2,CD44,CD80,CXCL10,IL6,LCN2	1	Activation of myeloid cells	0% (0/1)
3	11	1	puromycin aminonucleoside	9	CD14,CD44,CYBA,CYBB,FCGR2A,LCN2,LGALS3,MRC1,NCF1	1	Phagocytosis	0% (0/1)
3	11	1	diphenyleneiodonium	9	Ccl2,CCL2,CXCL2,CXCL3,HMOX1,IL18,IL6,MMP12,SERPINE1	1	Migration of phagocytes	0% (0/1)
3	11	1	TRAF3IP2	9	Ccl2,Ccl7,CXCL10,CXCL2,CXCL3,CXCL6,IL18,IL6,LCN2	1	Chemotaxis of leukocytes	100% (1/1)
3	11	1	TRAF3IP2	9	Ccl2,Ccl7,CXCL10,CXCL2,CXCL3,CXCL6,IL18,IL6,LCN2	1	Inflammatory response	100% (1/1)
3	11	1	TRAF3IP2	9	Ccl2,Ccl7,CXCL10,CXCL2,CXCL3,CXCL6,IL18,IL6,LCN2	1	Chemotaxis	100% (1/1)
3	11	1	FCGR2A	9	CCL1,Ccl2,CCL2,CCL22,CCL4,CLEC4E,CXCL10,IL18,IL6	1	Activation of antigen presenting cells	0% (0/1)
3	11	1	FCGR2A	9	CCL1,Ccl2,CCL2,CCL22,CCL4,CLEC4E,CXCL10,IL18,IL6	1	Activation of macrophages	0% (0/1)
3	11	1	lipid A	9	C3,CD14,CXCL10,FCGR1A,FCGR2B,IL6,MARCO,MSR1,THBS1	1	Phagocytosis of cells	0% (0/1)
3	11	1	lipid A	9	C3,CD14,CXCL10,FCGR1A,FCGR2B,IL6,MARCO,MSR1,THBS1	1	Engulfment of cells	0% (0/1)
2.94	16	1	doxorubicin	14	BTK,Ccl2,CCL2,CD44,CXCL2,CXCL3,CXCL6,CYBB,F3,IL6,LGALS3,PLAUR,S100A9,SPP1	1	Migration of granulocytes	0% (0/1)
2.91	19	1	cholesterol	17	APOE,CAV1,CCL1,Ccl2,CCL2,CCL4,Ccl7,CCR5,CXCL10,CXCL2,CXCL3,CYBB,IL6,INHBA,LGALS3,MMP14,THBS1	1	Chemotaxis	100% (1/1)
2.907	22	1	IL3	20	AREG,CCL2,CD80,CD86,CTLA4,FASN,FGFR4,HK2,IL6,LCN2,LILRB4,ODC1,OSM,PIM1,SERPINA3,SLC2A1,TAL1,TNFRSF4,TNFRSF9,TNFSF10	1	Cell survival	100% (1/1)
2.887	14	1	Alpha catenin	12	CTSB,CXCL10,CXCL2,CXCL6,IGF1,IL6,LYZ,MMP19,PLAU,PTX3,S100A9,THBS2	1	Inflammatory response	0% (0/1)
2.887	14	1	PDGF BB	12	C3,Ccl2,CCL2,CD44,CXCL2,F3,HMOX1,IL6,LGALS3,MMP14,PLAU,SERPINE1	1	Migration of myeloid cells	0% (0/1)
2.887	14	1	PPIF	12	CCL1,Ccl2,CCL2,CCL4,Ccl7,CCR5,CXCL10,CXCL2,CXCL3,CXCL6,PF4,PTN	1	Chemotaxis of phagocytes	0% (0/1)
2.887	14	1	PPIF	12	CCL1,Ccl2,CCL2,CCL4,Ccl7,CCR5,CXCL10,CXCL2,CXCL3,CXCL6,PF4,PTN	1	Chemotaxis of myeloid cells	0% (0/1)
2.887	14	1	EGR1	12	CAV1,Ccl2,CCL2,CCL3L3,CCL4,CD44,CXCL2,CXCL3,F3,MMP14,SERPINE1,SPP1	1	Transmigration of cells	0% (0/1)
2.887	14	1	poly rI:rC-RNA	12	C3,CD14,CD44,CXCL10,FCGR1A,FCGR2B,MARCO,MSR1,PLAU,PLAUR,SFTPD,THBS1	1	Phagocytosis of leukocytes	100% (1/1)
2.887	14	1	uric acid	12	BIRC5,Ccl2,CCL2,CCL3L3,CCL4,CD80,CD86,CXCL2,CXCL3,HMOX1,IL18,IL6	1	Cellular homeostasis	100% (1/1)
2.887	14	1	poly rI:rC-RNA	12	C3,CD14,CD44,CXCL10,FCGR1A,FCGR2B,MARCO,MSR1,PLAU,PLAUR,SFTPD,THBS1	1	Phagocytosis of blood cells	100% (1/1)
2.858	8	1	MYBL2	6	AURKA,BUB1,CCNA2,CCNB1,CDK1,UBE2C	1	Growth of connective tissue	100% (1/1)
2.858	8	1	CKAP2L	6	BIRC5,CDK1,CENPA,NCAPG,PLK1,UBE2C	1	Growth of tumor	100% (1/1)
2.858	8	1	C5AR1	6	C3,CD80,CD86,CXCL3,IGF1,IL6	1	Stimulation of cells	100% (1/1)
2.858	8	1	CXCL2	6	Ccl2,CCL3L3,CCL4,CXCL10,CXCL3,IL6	1	Cellular infiltration by leukocytes	100% (1/1)
2.858	8	1	CXCL2	6	Ccl2,CCL3L3,CCL4,CXCL10,CXCL3,IL6	1	Cellular infiltration by blood cells	100% (1/1)
2.858	8	1	CXCL2	6	Ccl2,CCL3L3,CCL4,CXCL10,CXCL3,IL6	1	Chemotaxis of leukocytes	100% (1/1)
2.858	8	1	CXCL2	6	Ccl2,CCL3L3,CCL4,CXCL10,CXCL3,IL6	1	Cellular infiltration	100% (1/1)
2.858	8	1	CXCL2	6	Ccl2,CCL3L3,CCL4,CXCL10,CXCL3,IL6	1	Chemotaxis	100% (1/1)
2.858	8	1	CXCL2	6	Ccl2,CCL3L3,CCL4,CXCL10,CXCL3,IL6	1	Recruitment of phagocytes	100% (1/1)
2.858	8	1	CXCL2	6	Ccl2,CCL3L3,CCL4,CXCL10,CXCL3,IL6	1	Binding of leukocytes	100% (1/1)
2.858	8	1	CXCL2	6	Ccl2,CCL3L3,CCL4,CXCL10,CXCL3,IL6	1	Interaction of leukocytes	100% (1/1)
2.858	8	1	CXCL2	6	Ccl2,CCL3L3,CCL4,CXCL10,CXCL3,IL6	1	Adhesion of blood cells	100% (1/1)
2.858	8	1	CXCL2	6	Ccl2,CCL3L3,CCL4,CXCL10,CXCL3,IL6	1	Homing of leukocytes	100% (1/1)
2.858	8	1	CXCL2	6	Ccl2,CCL3L3,CCL4,CXCL10,CXCL3,IL6	1	Recruitment of myeloid cells	100% (1/1)
2.858	8	1	CXCL2	6	Ccl2,CCL3L3,CCL4,CXCL10,CXCL3,IL6	1	Migration of phagocytes	100% (1/1)
2.858	8	1	C3	6	C3AR1,CCL2,CXCL10,CXCL3,IL6,LCN2	1	Immune response of phagocytes	100% (1/1)
2.858	8	1	CKAP2L	6	BIRC5,CDK1,CENPA,NCAPG,PLK1,UBE2C	1	Growth of lesion	100% (1/1)
2.858	8	1	Ccl2	6	CCL3L3,CCL4,CCR5,CXCL10,IL6,SPP1	1	Cell movement of T lymphocytes	100% (1/1)
2.858	8	1	Ccl2	6	CCL3L3,CCL4,CCR5,CXCL10,IL6,SPP1	1	T cell migration	100% (1/1)
2.858	8	1	C3	6	C3AR1,CCL2,CXCL10,CXCL3,IL6,LCN2	1	Immune response of myeloid cells	100% (1/1)
2.846	12	1	Bay 11-7082	10	Ccl2,CCL2,CCL3L3,CCL4,CD44,CXCL2,CXCL3,F3,IL6,MMP7	1	Migration of granulocytes	0% (0/1)
2.846	12	1	PARP1	10	CCL1,Ccl2,CCL4,CD80,CD86,CXCL10,CXCL3,HMOX1,IGF1,IL6	1	Activation of myeloid cells	0% (0/1)
2.846	12	1	H89	10	Ccl2,CD14,CD80,CD83,ESR1,IGF1,IL6,MITF,TPH1,TREM1	1	Leukopoiesis	0% (0/1)
2.846	12	1	IL18	10	Ccl2,CCL2,CCL3L3,CCL4,CCR5,CD44,CXCL10,CXCL3,IL6,SPP1	1	Recruitment of granulocytes	100% (1/1)
2.846	12	1	SAMSN1	10	BATF,CCL3L3,CCL4,Ccl7,CXCL10,CXCL2,IL18,IL6,INHBA,MARCO	1	Homing of leukocytes	0% (0/1)
2.846	12	1	SAMSN1	10	BATF,CCL3L3,CCL4,Ccl7,CXCL10,CXCL2,IL18,IL6,INHBA,MARCO	1	Homing of cells	0% (0/1)
2.846	12	1	TBK1	10	CCL3L3,CCL4,CXCL10,CXCL11,CXCL2,CXCL3,IL18,IL6,INHBA,MARCO	1	Chemotaxis of leukocytes	0% (0/1)
2.846	12	1	TBK1	10	CCL3L3,CCL4,CXCL10,CXCL11,CXCL2,CXCL3,IL18,IL6,INHBA,MARCO	1	Homing of leukocytes	0% (0/1)
2.846	12	1	SPP1	10	Ccl2,CCL2,CCL3L3,CCL4,CD44,CXCL2,CXCL3,CXCL6,IL6,SERPINE1	1	Recruitment of granulocytes	100% (1/1)
2.846	12	1	CD14	10	CCL1,Ccl2,CCL2,CCL3L3,CCL4,CXCL10,CXCL2,F3,IL6,MSR1	1	Binding of leukocytes	100% (1/1)
2.846	12	1	CD14	10	CCL1,Ccl2,CCL2,CCL3L3,CCL4,CXCL10,CXCL2,F3,IL6,MSR1	1	Interaction of leukocytes	100% (1/1)
2.846	12	1	CD14	10	CCL1,Ccl2,CCL2,CCL3L3,CCL4,CXCL10,CXCL2,F3,IL6,MSR1	1	Adhesion of blood cells	100% (1/1)
2.846	12	1	Ccl2	10	Ccl9,CCR5,CTSB,CXCL2,CXCL3,CYBB,IGF1,IL6,KDR,SPP1	1	Metastasis	100% (1/1)
2.846	12	1	C3	10	C3AR1,C5AR1,Ccl2,CCL2,CCL3L3,CCL4,CXCL10,CXCL2,CXCL3,LCN2	1	Chemotaxis of neutrophils	100% (1/1)
2.846	12	1	salmonella minnesota R595 lipopolysaccharides	10	Ccl2,CCL2,CCL4,CD80,CD83,CD86,CXCL10,CXCL6,HLA-DQA1,IL6	1	Quantity of lymphatic system cells	0% (0/1)
2.846	12	1	Ccl2	10	Ccl9,CCR5,CTSB,CXCL2,CXCL3,CYBB,IGF1,IL6,KDR,SPP1	1	Advanced malignant tumor	100% (1/1)
2.837	23	1	CSF2	21	C3,C5AR1,CCL17,Ccl2,CCL2,CCL3L3,CCL4,CCR5,CD74,CSF2RA,CXCL10,CXCL2,CXCL3,CYBB,INHBA,PLAU,PLAUR,SPI1,SPP1,THBS1,TREM1	1	Chemotaxis of myeloid cells	100% (1/1)
2.828	10	1	TRAF6	8	Ccl2,CCL2,CXCL2,CXCL3,CYBB,IL6,IRF5,NCF1	1	Cellular infiltration by leukocytes	100% (1/1)
2.828	10	1	BSG	8	CCL3L3,CXCL3,CXCL6,IL18,KDR,PLAU,PLAUR,SERPINE1	1	Cell movement of phagocytes	100% (1/1)
2.828	10	1	BSG	8	CCL3L3,CXCL3,CXCL6,IL18,KDR,PLAU,PLAUR,SERPINE1	1	Cell movement of myeloid cells	100% (1/1)
2.828	10	1	BSG	8	CCL3L3,CXCL3,CXCL6,IL18,KDR,PLAU,PLAUR,SERPINE1	1	Chemotaxis	100% (1/1)
2.828	10	1	STAT4	8	C3,CCL2,CCR5,CXCL10,CXCL2,CXCL3,IL6,SERPINE1	1	Chemotaxis of leukocytes	0% (0/1)
2.828	10	1	STAT4	8	C3,CCL2,CCR5,CXCL10,CXCL2,CXCL3,IL6,SERPINE1	1	Homing of leukocytes	0% (0/1)
2.828	10	1	STAT4	8	C3,CCL2,CCR5,CXCL10,CXCL2,CXCL3,IL6,SERPINE1	1	Recruitment of granulocytes	0% (0/1)
2.828	10	1	LIN9	8	AURKA,BIRC5,BUB1B,CDC6,CDK1,MYBL2,PLK1,UBE2C	1	Growth of tumor	0% (0/1)
2.828	10	1	LIN9	8	AURKA,BUB1,CCNA2,CCNB1,CDC6,CDK1,MYBL2,UBE2C	1	Growth of connective tissue	100% (1/1)
2.828	10	1	IL36A	8	Ccl7,CXCL10,CXCL2,CXCL3,CXCL6,IL6,LCN2,S100A9	1	Chemotaxis of leukocytes	0% (0/1)
2.828	10	1	IL36A	8	Ccl7,CXCL10,CXCL2,CXCL3,CXCL6,IL6,LCN2,S100A9	1	Cell movement of blood cells	100% (1/1)
2.828	10	1	IL36A	8	Ccl7,CXCL10,CXCL2,CXCL3,CXCL6,IL6,LCN2,S100A9	1	Inflammatory response	100% (1/1)
2.828	10	1	IL36A	8	Ccl7,CXCL10,CXCL2,CXCL3,CXCL6,IL6,LCN2,S100A9	1	Chemotaxis	0% (0/1)
2.828	10	1	lysophosphatidylinositol	8	C3,CCL2,CD74,CFTR,CXCL3,CXCL6,F3,TNFRSF4	1	Activation of blood cells	0% (0/1)
2.828	10	1	GNAI3	8	CCL1,CCL2,CCL3L3,CCL4,CXCL3,IL24,IL6,SPP1	1	Cell movement of leukocytes	100% (1/1)
2.828	10	1	GNAI3	8	CCL1,CCL2,CCL3L3,CCL4,CXCL3,IL24,IL6,SPP1	1	Activation of cells	0% (0/1)
2.828	10	1	2-bromoethylamine	8	CD14,CD44,ELF3,FCGR2A,LCN2,LGALS3,MRC1,STING1	1	Immune response of cells	0% (0/1)
2.828	10	1	PPARG	8	C3,CCL1,CCL17,CCL2,CCL22,CXCL2,CXCL3,CXCL6	1	Mobilization of Ca2+	100% (1/1)
2.828	10	1	CFB	8	ARG1,C3,C3AR1,C4A/C4B,C5AR1,CXCL2,CXCL3,PPARGC1A	1	Inflammatory response	0% (0/1)
2.828	10	1	IL17F	8	Ccl2,CCL2,CXCL10,CXCL2,CXCL3,CXCL6,IGF1,IL6	1	Migration of cells	100% (1/1)
2.828	10	1	IL17F	8	Ccl2,CCL2,CXCL10,CXCL2,CXCL3,CXCL6,IGF1,IL6	1	Inflammatory response	100% (1/1)
2.828	10	1	IL17F	8	Ccl2,CCL2,CXCL10,CXCL2,CXCL3,CXCL6,IGF1,IL6	1	Chemotaxis	0% (0/1)
2.828	10	1	Y 27632	8	Ccl2,CCL2,CD44,IL18,IL6,PLAU,SERPINE1,THBS1	1	Chemotaxis	100% (1/1)
2.828	10	1	Y 27632	8	Ccl2,CCL2,CD44,IL18,IL6,PLAU,SERPINE1,THBS1	1	Homing of leukocytes	100% (1/1)
2.828	10	1	silibinin	8	CCNB1,CCNE1,CD44,CDK1,IGFBP3,IL6,PLAU,PLAUR	1	Proliferation of connective tissue cells	0% (0/1)
2.828	10	1	silibinin	8	BIRC5,CCNB1,CCNE1,CDK1,IGFBP3,IL6,PLAU,PLAUR	1	Proliferation of muscle cells	0% (0/1)
2.828	10	1	PLAUR	8	C5AR1,Ccl2,CCL2,CTSB,CXCL3,CYBB,KDR,PLAU	1	Cell movement of phagocytes	100% (1/1)
2.828	10	1	PLAUR	8	C5AR1,Ccl2,CCL2,CTSB,CXCL3,CYBB,KDR,PLAU	1	Cell movement of myeloid cells	100% (1/1)
2.828	10	1	PLAUR	8	C5AR1,Ccl2,CCL2,CTSB,CXCL3,CYBB,KDR,PLAU	1	Cellular infiltration	100% (1/1)
2.828	10	1	fenamic acid	8	CD14,CD44,ELF3,FCGR2A,LCN2,LGALS3,MRC1,STING1	1	Immune response of cells	0% (0/1)
2.828	10	1	Hbb-b1	8	Ccl2,Ccl7,CCR5,CD44,CD74,CXCL10,CYBB,SPI1	1	Cell movement of myeloid cells	100% (1/1)
2.828	10	1	Hbb-b2	8	Ccl2,Ccl7,CCR5,CD44,CD74,CXCL10,CYBB,SPI1	1	Cell movement of myeloid cells	100% (1/1)
2.828	10	1	CpG ODN 1826	8	CD14,CXCL10,CYBA,CYBB,FCGR1A,FCGR2B,IL6,NCF1	1	Phagocytosis	100% (1/1)
2.828	10	1	PRKD	8	Ccl2,CCL3L3,CCL4,CXCL10,CXCL2,CXCL3,CXCL6,IL6	1	Chemotaxis of leukocytes	100% (1/1)
2.828	10	1	PRKD	8	Ccl2,CCL3L3,CCL4,CXCL10,CXCL2,CXCL3,CXCL6,IL6	1	Chemotaxis	100% (1/1)
2.828	10	1	PRKD	8	Ccl2,CCL3L3,CCL4,CXCL10,CXCL2,CXCL3,CXCL6,IL6	1	Recruitment of phagocytes	0% (0/1)
2.828	10	1	PRKD	8	Ccl2,CCL3L3,CCL4,CXCL10,CXCL2,CXCL3,CXCL6,IL6	1	Recruitment of myeloid cells	0% (0/1)
2.828	10	1	PRKD	8	Ccl2,CCL3L3,CCL4,CXCL10,CXCL2,CXCL3,CXCL6,IL6	1	Migration of phagocytes	0% (0/1)
2.828	10	1	leukotriene D4	8	CCL2,CCL3L3,CCL4,CXCL2,CYSLTR1,F3,IL6,NDRG1	1	Cell movement of leukocytes	100% (1/1)
2.828	10	1	VIPR1	8	Ccl2,CCL3L3,CCL4,CD80,CD86,CXCL10,CXCL2,CXCL3	1	Binding of leukocytes	0% (0/1)
2.828	10	1	VIPR1	8	Ccl2,CCL3L3,CCL4,CD80,CD86,CXCL10,CXCL2,CXCL3	1	Interaction of leukocytes	0% (0/1)
2.828	10	1	VIPR1	8	Ccl2,CCL3L3,CCL4,CD80,CD86,CXCL10,CXCL2,CXCL3	1	Adhesion of blood cells	0% (0/1)
2.828	10	1	5-O-mycolyl-beta-araf-(1->2)-5-O-mycolyl-alpha-araf-(1->1')-glycerol	8	CCL2,CCL3L3,CCL4,CD44,CXCL10,CXCL2,CXCL3,FABP4	1	Cell movement of neutrophils	0% (0/1)
2.828	10	1	5-O-mycolyl-beta-araf-(1->2)-5-O-mycolyl-alpha-araf-(1->1')-glycerol	8	CCL2,CCL3L3,CCL4,CD44,CXCL10,CXCL11,CXCL2,CXCL3	1	Mobilization of Ca2+	0% (0/1)
2.828	10	1	RNASE2	8	CCL1,CCL2,CCL22,CCL4,CD86,CXCL10,IL6,OSM	1	Activation of antigen presenting cells	100% (1/1)
2.828	10	1	salmonella minnesota R595 lipopolysaccharides	8	CD80,CD83,CD86,CXCL10,HLA-DQA1,HLA-DRA,IL6,Tnfsf9	1	Lymphopoiesis	0% (0/1)
2.828	10	1	Salmonella enterica serotype abortus equi lipopolysaccharide	8	CDK1,EREG,F3,IL18,IL6,INHBA,PLAU,THBS1	1	Proliferation of muscle cells	0% (0/1)
2.828	10	1	salmonella minnesota R595 lipopolysaccharides	8	CD80,CD83,CD86,CXCL10,HLA-DQA1,HLA-DRA,IL6,Tnfsf9	1	Lymphocyte homeostasis	0% (0/1)
2.828	10	1	lysophosphatidic acid	8	Ccl2,CCL2,CD14,IL6,KDR,MSR1,PLAU,SERPINE1	1	Quantity of connective tissue	0% (0/1)
2.828	10	1	salmonella minnesota R595 lipopolysaccharides	8	CD80,CD83,CD86,CXCL10,HLA-DQA1,HLA-DRA,IL6,Tnfsf9	1	T cell homeostasis	0% (0/1)
2.828	10	1	MAP2K1	8	BCL2A1,CCL2,CD44,CXCL3,F3,IL6,OSM,TNFSF10	1	Accumulation of granulocytes	0% (0/1)
2.828	10	1	salmonella minnesota R595 lipopolysaccharides	8	CD80,CD83,CD86,CXCL10,HLA-DQA1,HLA-DRA,IL6,Tnfsf9	1	T cell development	0% (0/1)
2.774	15	1	ZFP36	13	CDC6,CTSS,CXCL2,CYBB,E2F8,IL6,LCN2,OSM,PIM1,PLAU,PLAUR,S100A9,SPP1	1	Development of vasculature	0% (0/1)
2.774	15	1	ZFP36	13	CDC6,CTSS,CXCL2,CYBB,E2F8,IL6,LCN2,OSM,PIM1,PLAU,PLAUR,S100A9,SPP1	1	Angiogenesis	0% (0/1)
2.753	21	1	IL3	19	AREG,CCL2,CD80,CD86,CTLA4,FASN,FGFR4,HK2,IL6,LCN2,LILRB4,OSM,PIM1,SERPINA3,SLC2A1,TAL1,TNFRSF4,TNFRSF9,TNFSF10	1	Cell viability	100% (1/1)
2.75	18	1	Pam3-Cys-Ser-Lys4	16	CCL17,Ccl2,CCL2,CCL22,CCL3L3,CCL4,Ccl7,CCR5,CXCL10,CXCL2,CXCL3,CXCL6,FCGR2A,IL18,PTGES,SPI1	1	Chemotaxis of phagocytes	100% (1/1)
2.75	18	1	Pam3-Cys-Ser-Lys4	16	CCL17,Ccl2,CCL2,CCL22,CCL3L3,CCL4,Ccl7,CCR5,CXCL10,CXCL2,CXCL3,CXCL6,FCGR2A,IL18,PTGES,SPI1	1	Chemotaxis of myeloid cells	100% (1/1)
2.714	13	1	cytokine	11	CCL2,CCL22,CD80,CD86,CXCL3,HMOX1,IL6,MMP12,PLAU,PLAUR,SERPINE1	1	Migration of phagocytes	0% (0/1)
2.714	13	1	BCL6	11	Ccl2,CCL2,CCL3L3,CCL4,Ccl7,CXCL10,CXCL3,IL18,IL6,LITAF,SERPINE1	1	Chemotaxis of leukocytes	0% (0/1)
2.714	13	1	TGM2	11	C3,CCL2,CCL22,CD74,CD86,CXCL10,IL6,ITGAX,SPP1,THBS1,TYROBP	1	Binding of leukocytes	100% (1/1)
2.714	13	1	TGM2	11	C3,CCL2,CCL22,CD74,CD86,CXCL10,IL6,ITGAX,SPP1,THBS1,TYROBP	1	Interaction of leukocytes	100% (1/1)
2.714	13	1	TGM2	11	C3,CCL2,CCL22,CD74,CD86,CXCL10,IL6,ITGAX,SPP1,THBS1,TYROBP	1	Adhesion of blood cells	100% (1/1)
2.714	13	1	lipoteichoic acid	11	Ccl2,CCL2,CD14,CD80,CD86,CXCL10,CYBB,HMOX1,IL1RN,IL6,TREM1	1	Activation of myeloid cells	100% (1/1)
2.714	13	1	ZFP36	11	CTSS,CXCL2,IL6,LCN2,OSM,PBK,PLAU,PLAUR,PRC1,S100A9,SPP1	1	Invasion of cells	100% (1/1)
2.714	13	1	poly rI:rC-RNA	11	C3,CD14,CD44,CXCL10,FCGR1A,FCGR2B,MARCO,PLAU,PLAUR,SFTPD,THBS1	1	Phagocytosis of phagocytes	100% (1/1)
2.714	13	1	immethridine	11	BTK,C3,C5AR1,CCR5,CD14,CD44,CXCL3,FCGR1A,IL6,LCN2,SIGLEC1	1	Response of myeloid cells	0% (0/1)
2.714	13	1	salmonella minnesota R595 lipopolysaccharides	11	Ccl2,CCL2,CCL22,CCL4,CD80,CD83,CD86,CXCL10,HLA-DRA,IL6,Tnfsf9	1	Activation of T lymphocytes	0% (0/1)
2.714	13	1	poly rI:rC-RNA	11	C3,CD14,CD44,CXCL10,FCGR1A,FCGR2B,MARCO,PLAU,PLAUR,SFTPD,THBS1	1	Phagocytosis of myeloid cells	100% (1/1)
2.694	33	1	cardiotoxin	31	APLN,C5AR1,CCL1,CCL17,Ccl2,CCL2,CCL3L3,CCL4,Ccl7,Ccl9,CCR5,CXCL10,EGF,GSN,HP,IGF1,IGF2,IL18,IL6,INHBA,ITGB2,LCN2,MMP7,OSM,PIGR,PTN,S100A9,SERPINE1,SPP1,THBS1,TREM1	1	Chemotaxis	0% (0/1)
2.683	7	1	TLR5	5	Ccl2,CCL4,CXCL2,CXCL3,IL6	1	Inflammatory response	100% (1/1)
2.683	7	1	TLR5	5	Ccl2,CCL4,CXCL2,CXCL3,IL6	1	Recruitment of phagocytes	100% (1/1)
2.683	7	1	TLR5	5	Ccl2,CCL4,CXCL2,CXCL3,IL6	1	Recruitment of myeloid cells	100% (1/1)
2.683	7	1	SERPINE2	5	Ccl2,CCL22,CCL4,CXCL10,IL6	1	Cellular infiltration by mononuclear leukocytes	100% (1/1)
2.683	7	1	CXCL3	5	Ccl2,CCL3L3,CCL4,CXCL10,IL6	1	Cellular infiltration by leukocytes	100% (1/1)
2.683	7	1	CXCL3	5	Ccl2,CCL3L3,CCL4,CXCL10,IL6	1	Cellular infiltration by blood cells	100% (1/1)
2.683	7	1	CXCL3	5	Ccl2,CCL3L3,CCL4,CXCL10,IL6	1	Activation of cells	100% (1/1)
2.683	7	1	CXCL3	5	Ccl2,CCL3L3,CCL4,CXCL10,IL6	1	Chemotaxis of leukocytes	100% (1/1)
2.683	7	1	CXCL3	5	Ccl2,CCL3L3,CCL4,CXCL10,IL6	1	Cellular infiltration	100% (1/1)
2.683	7	1	CXCL3	5	Ccl2,CCL3L3,CCL4,CXCL10,IL6	1	Chemotaxis	100% (1/1)
2.683	7	1	CXCL3	5	Ccl2,CCL3L3,CCL4,CXCL10,IL6	1	Lymphocyte migration	100% (1/1)
2.683	7	1	CXCL3	5	Ccl2,CCL3L3,CCL4,CXCL10,IL6	1	Recruitment of phagocytes	100% (1/1)
2.683	7	1	CXCL3	5	Ccl2,CCL3L3,CCL4,CXCL10,IL6	1	Binding of leukocytes	100% (1/1)
2.683	7	1	CXCL3	5	Ccl2,CCL3L3,CCL4,CXCL10,IL6	1	Migration of lymphatic system cells	100% (1/1)
2.683	7	1	CXCL3	5	Ccl2,CCL3L3,CCL4,CXCL10,IL6	1	Interaction of leukocytes	100% (1/1)
2.683	7	1	CXCL3	5	Ccl2,CCL3L3,CCL4,CXCL10,IL6	1	Adhesion of blood cells	100% (1/1)
2.683	7	1	CXCL3	5	Ccl2,CCL3L3,CCL4,CXCL10,IL6	1	Homing of leukocytes	100% (1/1)
2.683	7	1	CXCL3	5	Ccl2,CCL3L3,CCL4,CXCL10,IL6	1	Migration of mononuclear leukocytes	100% (1/1)
2.683	7	1	CXCL3	5	Ccl2,CCL3L3,CCL4,CXCL10,IL6	1	Recruitment of myeloid cells	100% (1/1)
2.683	7	1	CXCL3	5	Ccl2,CCL3L3,CCL4,CXCL10,IL6	1	Migration of phagocytes	100% (1/1)
2.673	16	1	CD40	14	CCL2,CCNA2,CD44,CNR2,IL18,IL24,IL6,LGALS3,MMP14,PTGER2,RASGRF1,SERPINE1,SLC2A1,TNFSF10	1	Proliferation of connective tissue cells	100% (1/1)
2.667	11	1	MET	9	AREG,CCL3L3,Ccl7,CD44,HMOX1,IL18,IL6,INHBA,SPP1	1	Cell movement of phagocytes	100% (1/1)
2.667	11	1	MET	9	AREG,CCL3L3,Ccl7,CD44,HMOX1,IL18,IL6,INHBA,SPP1	1	Cell movement of myeloid cells	100% (1/1)
2.667	11	1	TREM1	9	ADORA2B,CD14,CD83,CD86,CXCL10,IL6,INHBA,MMP19,SPP1	1	Lymphopoiesis	0% (0/1)
2.667	11	1	U0126	9	BHLHE40,Ccl2,CCL2,CXCL11,HMOX1,ICOS,IL6,PLAUR,SFTPA1	1	Response of mononuclear leukocytes	0% (0/1)
2.667	11	1	hydrogen peroxide	9	Ccl2,CCL2,CCL3L3,CCL4,CXCL3,CXCL6,LCN2,PLAUR,SPP1	1	Chemotaxis of granulocytes	0% (0/1)
2.667	11	1	2,4-dinitrofluorobenzene	9	ARG1,Ccl2,CCL3L3,CCL4,CXCL10,CXCL2,IL18,IL24,PTGES	1	Inflammatory response	100% (1/1)
2.667	11	1	2,4-dinitrofluorobenzene	9	ARG1,Ccl2,CCL3L3,CCL4,CXCL10,CXCL2,IL18,IL24,PTGES	1	Cellular infiltration	100% (1/1)
2.667	11	1	EP400	9	CCNA2,CCNF,CDC20,E2F7,E2F8,MYBL2,RBL1,TBX21,UHRF1	1	Organismal death	100% (1/1)
2.667	11	1	simvastatin	9	C5AR1,Ccl2,CCL2,CXCL2,CXCL3,IL18,ITGB2,LCN2,SPP1	1	Chemotaxis of neutrophils	0% (0/1)
2.667	11	1	caffeic acid phenethyl ester	9	Ccl2,CD44,CD83,CXCL10,CXCL3,F3,HMOX1,IL6,MMP14	1	Activation of cells	100% (1/1)
2.667	11	1	IL5	9	AREG,CCL2,CCL22,CCR5,CD80,CSF2RB,NDRG1,SEMA4A,TNFRSF9	1	Cell movement of antigen presenting cells	100% (1/1)
2.667	11	1	tyrphostin AG 1478	9	AREG,CAV1,CCL2,EGF,IL6,PLAU,PTGER2,PTTG1,SLC2A1	1	Proliferation of connective tissue cells	100% (1/1)
2.667	11	1	IL-1R	9	CXCL11,CXCL2,CXCL3,IL6,MMP12,MMP14,PLAU,PLAUR,SERPINE1	1	Migration of phagocytes	0% (0/1)
2.667	11	1	HBB	9	Ccl2,CCL3L3,CCL4,CXCL10,CXCL2,CXCL3,CXCL6,IL6,SERPINE1	1	Chemotaxis of leukocytes	0% (0/1)
2.667	11	1	HBB	9	Ccl2,CCL3L3,CCL4,CXCL10,CXCL2,CXCL3,CXCL6,IL6,SERPINE1	1	Recruitment of phagocytes	0% (0/1)
2.667	11	1	HBB	9	Ccl2,CCL3L3,CCL4,CXCL10,CXCL2,CXCL3,CXCL6,IL6,SERPINE1	1	Inflammatory response	0% (0/1)
2.667	11	1	HBB	9	Ccl2,CCL3L3,CCL4,CXCL10,CXCL2,CXCL3,CXCL6,IL6,SERPINE1	1	Chemotaxis	0% (0/1)
2.667	11	1	HBB	9	Ccl2,CCL3L3,CCL4,CXCL10,CXCL2,CXCL3,CXCL6,IL6,SERPINE1	1	Recruitment of myeloid cells	0% (0/1)
2.667	11	1	HBB	9	Ccl2,CCL3L3,CCL4,CXCL10,CXCL2,CXCL3,CXCL6,IL6,SERPINE1	1	Migration of phagocytes	0% (0/1)
2.667	11	1	15-deoxy-delta-12,14 -PGJ 2	9	Ccl2,CCL2,CXCL10,CYBB,HMOX1,IL6,MSR1,PTGES,SPP1	1	Activation of phagocytes	100% (1/1)
2.667	11	1	PLAU	9	C5AR1,Ccl2,CCL2,CCR5,CXCL3,PLAUR,PTN,S100A9,SERPINE1	1	Chemotaxis of phagocytes	100% (1/1)
2.667	11	1	PLAU	9	C5AR1,Ccl2,CCL2,CCR5,CXCL3,PLAUR,PTN,S100A9,SERPINE1	1	Chemotaxis of myeloid cells	100% (1/1)
2.667	11	1	EP400	9	CCNA2,CCNF,CDC20,E2F7,E2F8,MYBL2,RBL1,TBX21,UHRF1	1	Morbidity or mortality	100% (1/1)
2.667	11	1	LIN9	9	AURKA,BIRC5,BUB1,BUB1B,CCNA2,CDK1,CENPE,MYBL2,UBE2C	1	Morbidity or mortality	100% (1/1)
2.667	11	1	LIN9	9	AURKA,BIRC5,BUB1,BUB1B,CCNA2,CDK1,CENPE,MYBL2,UBE2C	1	Organismal death	100% (1/1)
2.667	11	1	FCGR2A	9	Ccl2,CCL2,CCL22,CCL4,CLEC4E,CXCL10,GPR84,IL18,IL6	1	Hypersensitive reaction	100% (1/1)
2.667	11	1	salmonella minnesota R595 lipopolysaccharides	9	Ccl2,CD80,CD83,CD86,CXCL10,HLA-DQA1,HLA-DRA,IL6,Tnfsf9	1	Homeostasis of mononuclear leukocytes	0% (0/1)
2.646	9	1	phenylbutazone	7	C4A/C4B,CD44,FCGR2A,LCN2,LGALS3,SPP1,STING1	1	Cell movement of leukocytes	0% (0/1)
2.646	9	1	ARRB2	7	ADRA2A,Ccl2,CXCL2,CXCL3,F3,IL6,SERPINE1	1	Migration of cells	100% (1/1)
2.646	9	1	PTGES	7	BIRC5,Ccl2,CYBA,CYBB,IL6,NCF1,SERPINE1	1	Angiogenesis	100% (1/1)
2.646	9	1	cuprizone	7	Ccl2,CCL3L3,CCL4,CXCL10,FABP5,LCP1,LGALS3	1	Migration of mononuclear leukocytes	0% (0/1)
2.646	9	1	trovafloxacin	7	BHLHE40,CXCL2,CXCL3,HMOX1,IL6,SOD2,THBS1	1	Transport of molecule	0% (0/1)
2.646	9	1	GPS2	7	Ccl2,CCL3L3,CCL4,CD14,CXCL10,CXCL2,IL6	1	Recruitment of phagocytes	0% (0/1)
2.646	9	1	GPS2	7	Ccl2,CCL3L3,CCL4,CD14,CXCL10,CXCL2,IL6	1	Binding of leukocytes	0% (0/1)
2.646	9	1	GPS2	7	Ccl2,CCL3L3,CCL4,CD14,CXCL10,CXCL2,IL6	1	Interaction of leukocytes	0% (0/1)
2.646	9	1	GPS2	7	Ccl2,CCL3L3,CCL4,CD14,CXCL10,CXCL2,IL6	1	Adhesion of blood cells	0% (0/1)
2.646	9	1	GPS2	7	Ccl2,CCL3L3,CCL4,CD14,CXCL10,CXCL2,IL6	1	Recruitment of myeloid cells	0% (0/1)
2.646	9	1	vitamin E	7	CCL2,Ccl9,CD44,F3,MMP14,SERPINE1,SPP1	1	Activation of cells	100% (1/1)
2.646	9	1	RNASE1	7	CCL1,CCL2,CCL22,CCL4,CXCL10,IL6,OSM	1	Lymphocyte migration	0% (0/1)
2.646	9	1	RNASE1	7	CCL1,CCL2,CCL22,CCL4,CXCL10,IL6,OSM	1	Migration of lymphatic system cells	0% (0/1)
2.646	9	1	RNASE1	7	CCL1,CCL2,CCL22,CCL4,CXCL10,IL6,OSM	1	Activation of phagocytes	0% (0/1)
2.646	9	1	RNASE1	7	CCL1,CCL2,CCL22,CCL4,CXCL10,IL6,OSM	1	Inflammatory response	0% (0/1)
2.646	9	1	RNASE1	7	CCL1,CCL2,CCL22,CCL4,CXCL10,IL6,OSM	1	Chemotaxis	0% (0/1)
2.646	9	1	RNASE1	7	CCL1,CCL2,CCL22,CCL4,CXCL10,IL6,OSM	1	Binding of leukocytes	0% (0/1)
2.646	9	1	RNASE1	7	CCL1,CCL2,CCL22,CCL4,CXCL10,IL6,OSM	1	Interaction of leukocytes	0% (0/1)
2.646	9	1	RNASE1	7	CCL1,CCL2,CCL22,CCL4,CXCL10,IL6,OSM	1	Adhesion of blood cells	0% (0/1)
2.646	9	1	RNASE1	7	CCL1,CCL2,CCL22,CCL4,CXCL10,IL6,OSM	1	Activation of antigen presenting cells	0% (0/1)
2.646	9	1	RNASE1	7	CCL1,CCL2,CCL22,CCL4,CXCL10,IL6,OSM	1	Migration of mononuclear leukocytes	0% (0/1)
2.646	9	1	etanercept	7	CCL2,CXCL10,CYBB,IL6,MMP12,NCF1,PTGES	1	Cellular infiltration by leukocytes	0% (0/1)
2.646	9	1	etanercept	7	CCL2,CXCL10,CYBB,IL6,MMP12,NCF1,PTGES	1	Cellular infiltration by blood cells	0% (0/1)
2.646	9	1	gentamicin C	7	CD14,CD44,ELF3,FCGR2A,LCN2,LGALS3,MRC1	1	Immune response of cells	0% (0/1)
2.646	9	1	gentamicin C	7	C4A/C4B,CD14,CD44,FCGR2A,LCN2,LGALS3,SPP1	1	Activation of myeloid cells	0% (0/1)
2.646	9	1	MAP3K7	7	ACTA1,Ccl2,CD14,HMOX1,IL6,SERPINE1,TNFSF10	1	Quantity of connective tissue	0% (0/1)
2.646	9	1	MAP3K7	7	Ccl2,CXCL10,CXCL2,CXCL6,HMOX1,IL6,SERPINE1	1	Migration of phagocytes	0% (0/1)
2.646	9	1	aldosterone	7	Ccl2,CCL2,CYBB,IL6,LCN2,LGALS3,SPP1	1	Activation of phagocytes	0% (0/1)
2.646	9	1	aldosterone	7	Ccl2,CCL2,CYBB,IL6,LCN2,LGALS3,SPP1	1	Activation of myeloid cells	0% (0/1)
2.646	9	1	BCL3	7	CD80,CD86,CXCL10,CXCL2,CXCL3,IL6,PLAUR	1	Binding of leukocytes	0% (0/1)
2.646	9	1	BCL3	7	CD80,CD86,CXCL10,CXCL2,CXCL3,IL6,PLAUR	1	Interaction of leukocytes	0% (0/1)
2.646	9	1	BCL3	7	CD80,CD86,CXCL10,CXCL2,CXCL3,IL6,PLAUR	1	Adhesion of blood cells	0% (0/1)
2.646	9	1	NOS2	7	Ccl2,CD14,CD44,HMOX1,IL6,LCN2,TYROBP	1	Phagocytosis	0% (0/1)
2.646	9	1	chrysotile asbestos	7	Ccl9,CTSK,CTSS,CTSZ,IL6,ITGAX,MMP12	1	Migration of cells	100% (1/1)
2.646	9	1	RIPK1	7	ARG1,Ccl2,CCL2,CXCL10,GRN,IL6,Retnla	1	Activation of macrophages	0% (0/1)
2.646	9	1	RIPK1	7	ARG1,Ccl2,CCL2,CXCL10,GRN,IL6,Retnla	1	Activation of myeloid cells	0% (0/1)
2.646	9	1	RIPK1	7	ARG1,Ccl2,CCL2,CXCL10,GRN,IL6,Retnla	1	Activation of antigen presenting cells	0% (0/1)
2.646	9	1	SLC9A3R1	7	CCL3L3,CCL4,CCR8,CXCL2,CXCL3,CXCL6,IL6	1	Chemotaxis	0% (0/1)
2.646	9	1	SLC9A3R1	7	CCL3L3,CCL4,CCR8,CXCL2,CXCL3,CXCL6,IL6	1	Recruitment of phagocytes	0% (0/1)
2.646	9	1	SLC9A3R1	7	CCL3L3,CCL4,CCR8,CXCL2,CXCL3,CXCL6,IL6	1	Recruitment of myeloid cells	0% (0/1)
2.646	9	1	OLR1	7	CCL2,CYBA,CYBB,IL6,NCF1,SPP1,TGFBR1	1	Angiogenesis	100% (1/1)
2.646	9	1	CLEC7A	7	CCL17,CCL2,CCL22,CCL3L3,CCL4,CXCL2,IL6	1	Chemotaxis of leukocytes	0% (0/1)
2.646	9	1	CLEC7A	7	CCL17,CCL2,CCL22,CCL3L3,CCL4,CXCL2,IL6	1	Recruitment of leukocytes	100% (1/1)
2.646	9	1	CLEC7A	7	CCL17,CCL2,CCL22,CCL3L3,CCL4,CXCL2,IL6	1	Inflammatory response	100% (1/1)
2.646	9	1	CLEC7A	7	CCL17,CCL2,CCL22,CCL3L3,CCL4,CXCL2,IL6	1	Chemotaxis	0% (0/1)
2.646	9	1	CLEC7A	7	CCL17,CCL2,CCL22,CCL3L3,CCL4,CXCL2,IL6	1	Recruitment of blood cells	100% (1/1)
2.646	9	1	CLEC7A	7	CCL17,CCL2,CCL22,CCL3L3,CCL4,CXCL2,IL6	1	Adhesion of immune cells	0% (0/1)
2.646	9	1	CLEC7A	7	CCL17,CCL2,CCL22,CCL3L3,CCL4,CXCL2,IL6	1	Interaction of leukocytes	0% (0/1)
2.646	9	1	CLEC7A	7	CCL17,CCL2,CCL22,CCL3L3,CCL4,CXCL2,IL6	1	Adhesion of blood cells	0% (0/1)
2.646	9	1	CLEC7A	7	CCL17,CCL2,CCL22,CCL3L3,CCL4,CXCL2,IL6	1	Migration of phagocytes	0% (0/1)
2.646	9	1	lomustine	7	CD14,CD44,ELF3,FCGR2A,LCN2,LGALS3,STING1	1	Immune response of cells	0% (0/1)
2.646	9	1	lomustine	7	C4A/C4B,CD14,CD44,FCGR2A,LCN2,LGALS3,SPP1	1	Activation of myeloid cells	0% (0/1)
2.646	9	1	IL27	7	CCL2,CCL4,CD74,CXCL10,CXCL11,IL18,IL6	1	Chemotaxis of leukocytes	0% (0/1)
2.646	9	1	Ifn	7	CD44,CXCL10,CXCL11,LCN2,SERPINE1,SPP1,TLR5	1	Recruitment of leukocytes	0% (0/1)
2.646	9	1	TP63	7	F3,IL6,IRF5,P2RY2,SERPINE1,THBS1,THBS2	1	Recruitment of phagocytes	0% (0/1)
2.646	9	1	STK11	7	Ccl2,CCL2,CXCL2,CXCL3,IL6,SPP1,TNFSF10	1	Accumulation of granulocytes	100% (1/1)
2.646	9	1	MDK	7	Ccl2,CCL2,CXCL3,GZMB,IL6,S100A9,SPP1	1	Adhesion of blood cells	0% (0/1)
2.646	9	1	Interferon alpha	7	C3,C3AR1,CCL2,CXCL10,CXCL2,CXCL3,S100A9	1	Chemotaxis of neutrophils	0% (0/1)
2.646	9	1	VIP	7	Ccl2,CCL2,CCL3L3,CCL4,CXCL10,CXCL2,CXCL3	1	Chemotaxis of phagocytes	100% (1/1)
2.646	9	1	VIP	7	Ccl2,CCL2,CCL3L3,CCL4,CXCL10,CXCL2,CXCL3	1	Chemotaxis of myeloid cells	100% (1/1)
2.646	9	1	hexachlorobenzene	7	CD14,CD44,ELF3,FCGR2A,LCN2,LGALS3,MRC1	1	Immune response of cells	0% (0/1)
2.646	9	1	hexachlorobenzene	7	C4A/C4B,CD14,CD44,FCGR2A,LCN2,LGALS3,SPP1	1	Activation of myeloid cells	0% (0/1)
2.646	9	1	PGLYRP2	7	CCL17,Ccl2,CCL2,CCL4,Ccl7,CXCL2,CXCL6	1	Chemotaxis of phagocytes	0% (0/1)
2.646	9	1	PGLYRP2	7	CCL17,Ccl2,CCL2,CCL4,Ccl7,CXCL2,CXCL6	1	Chemotaxis of myeloid cells	0% (0/1)
2.646	9	1	PGLYRP2	7	CCL17,Ccl2,CCL2,CCL4,Ccl7,CXCL2,CXCL6	1	Chemotaxis of leukocytes	0% (0/1)
2.646	9	1	PGLYRP2	7	CCL17,Ccl2,CCL2,CCL4,Ccl7,CXCL2,CXCL6	1	Chemotaxis	0% (0/1)
2.646	9	1	PGLYRP2	7	CCL17,Ccl2,CCL2,CCL4,Ccl7,CXCL2,CXCL6	1	Homing of leukocytes	0% (0/1)
2.646	9	1	PP2/AG1879 tyrosine kinase inhibitor	7	CCL2,HMOX1,IL6,PLAU,SERPINE1,SOD2,SPP1	1	Quantity of connective tissue	0% (0/1)
2.646	9	1	ZFTA-RELA	7	Ccl2,CCL3L3,CD44,CXCL10,CXCL2,CXCL3,IL6	1	Binding of leukocytes	0% (0/1)
2.646	9	1	ZFTA-RELA	7	Ccl2,CCL3L3,CD44,CXCL10,CXCL2,CXCL3,IL6	1	Interaction of leukocytes	0% (0/1)
2.646	9	1	ZFTA-RELA	7	Ccl2,CCL3L3,CD44,CXCL10,CXCL2,CXCL3,IL6	1	Adhesion of blood cells	0% (0/1)
2.646	9	1	DDX58	7	Ccl2,CCL2,CCL4,CD4,CXCL10,IL6,SPP1	1	Inflammatory response	0% (0/1)
2.646	9	1	DDX58	7	Ccl2,CCL2,CCL4,CD4,CXCL10,IL6,SPP1	1	Recruitment of phagocytes	0% (0/1)
2.646	9	1	DDX58	7	Ccl2,CCL2,CCL4,CD4,CXCL10,IL6,SPP1	1	Binding of leukocytes	0% (0/1)
2.646	9	1	DDX58	7	Ccl2,CCL2,CCL4,CD4,CXCL10,IL6,SPP1	1	Interaction of leukocytes	0% (0/1)
2.646	9	1	DDX58	7	Ccl2,CCL2,CCL4,CD4,CXCL10,IL6,SPP1	1	Adhesion of blood cells	0% (0/1)
2.646	9	1	DDX58	7	Ccl2,CCL2,CCL4,CD4,CXCL10,IL6,SPP1	1	T cell migration	0% (0/1)
2.646	9	1	DDX58	7	Ccl2,CCL2,CCL4,CD4,CXCL10,IL6,SPP1	1	Recruitment of myeloid cells	0% (0/1)
2.646	9	1	DDX58	7	Ccl2,CCL2,CCL4,CD4,CXCL10,IL6,SPP1	1	Migration of lymphatic system cells	100% (1/1)
2.646	9	1	CITED2	7	C3,C5AR1,Ccl2,CCL2,CXCL10,CXCL2,CXCL3	1	Chemotaxis of neutrophils	0% (0/1)
2.646	9	1	LAMA5	7	Ccl2,CCL3L3,CCL4,Ccl7,CXCL10,CXCL3,MMP14	1	Cell movement of phagocytes	0% (0/1)
2.646	9	1	LAMA5	7	Ccl2,CCL3L3,CCL4,Ccl7,CXCL10,CXCL3,MMP14	1	Cell movement of myeloid cells	100% (1/1)
2.646	9	1	LAMA5	7	Ccl2,CCL3L3,CCL4,Ccl7,CXCL10,CXCL3,MMP14	1	Chemotaxis	0% (0/1)
2.646	9	1	LAMA5	7	Ccl2,CCL3L3,CCL4,Ccl7,CXCL10,CXCL3,MMP14	1	Cell movement of lymphatic system cells	0% (0/1)
2.646	9	1	SAA1	7	CCL17,Ccl2,CCL3L3,CCL4,CXCL10,CXCL6,S100A9	1	Chemotaxis of phagocytes	100% (1/1)
2.646	9	1	SAA1	7	CCL17,Ccl2,CCL3L3,CCL4,CXCL10,CXCL6,S100A9	1	Chemotaxis of myeloid cells	100% (1/1)
2.646	9	1	MLN120B	7	ACP5,Ccl2,CTSB,CTSK,CXCL2,CXCL6,IL6	1	Migration of cells	100% (1/1)
2.646	9	1	IL23A	7	Ccl2,CLEC5A,CXCL10,HP,ICOS,IL6,S100A9	1	Cell movement of leukocytes	100% (1/1)
2.646	9	1	IL23A	7	Ccl2,CLEC5A,CXCL10,HP,ICOS,IL6,S100A9	1	Cell movement of blood cells	100% (1/1)
2.646	9	1	SELP	7	CCL2,CXCL2,F3,HCK,IGF1,IL6,PLAUR	1	Angiogenesis	100% (1/1)
2.646	9	1	SELP	7	BCL2A1,CCL2,CCL4,F3,HCK,IGF1,IL6	1	Quantity of lymphatic system cells	100% (1/1)
2.646	9	1	SELP	7	CCL4,CXCL2,HCK,IGF1,IL1R2,IL6,PLAUR	1	Synthesis of reactive oxygen species	100% (1/1)
2.646	9	1	CpG ODN 1668	7	Ccl2,CCL3L3,CCL4,CXCL10,CXCL3,IL6,TLR5	1	Inflammatory response	100% (1/1)
2.646	9	1	CpG ODN 1668	7	Ccl2,CD80,CD86,CXCL10,CXCL3,IL6,TLR5	1	Leukopoiesis	100% (1/1)
2.646	9	1	CpG ODN 1668	7	Ccl2,CCL3L3,CCL4,CXCL10,CXCL3,IL6,TLR5	1	Recruitment of phagocytes	0% (0/1)
2.646	9	1	CpG ODN 1668	7	Ccl2,CCL3L3,CCL4,CXCL10,CXCL3,IL6,TLR5	1	Recruitment of myeloid cells	0% (0/1)
2.646	9	1	SIGIRR	7	Ccl2,CCL3L3,CXCL2,CXCL3,IL18,IL6,S100A9	1	Cellular infiltration by leukocytes	100% (1/1)
2.646	9	1	SIGIRR	7	Ccl2,CCL3L3,CXCL2,CXCL3,IL18,IL6,S100A9	1	Cellular infiltration by blood cells	100% (1/1)
2.646	9	1	SIGIRR	7	Ccl2,CCL3L3,CXCL2,CXCL3,IL18,IL6,S100A9	1	Chemotaxis of leukocytes	0% (0/1)
2.646	9	1	SIGIRR	7	Ccl2,CCL3L3,CXCL2,CXCL3,IL18,IL6,S100A9	1	Cellular infiltration	100% (1/1)
2.646	9	1	SIGIRR	7	Ccl2,CCL3L3,CXCL2,CXCL3,IL18,IL6,S100A9	1	Chemotaxis	0% (0/1)
2.646	9	1	SIGIRR	7	Ccl2,CCL3L3,CXCL2,CXCL3,IL18,IL6,S100A9	1	Adhesion of immune cells	0% (0/1)
2.646	9	1	SIGIRR	7	Ccl2,CCL3L3,CXCL2,CXCL3,IL18,IL6,S100A9	1	Interaction of leukocytes	0% (0/1)
2.646	9	1	SIGIRR	7	Ccl2,CCL3L3,CXCL2,CXCL3,IL18,IL6,S100A9	1	Adhesion of blood cells	0% (0/1)
2.646	9	1	SIGIRR	7	Ccl2,CCL3L3,CXCL2,CXCL3,IL18,IL6,S100A9	1	Homing of leukocytes	0% (0/1)
2.646	9	1	SIGIRR	7	Ccl2,CCL3L3,CXCL2,CXCL3,IL18,IL6,S100A9	1	Migration of phagocytes	0% (0/1)
2.646	9	1	miR-155-5p (miRNAs w/seed UAAUGCU)	7	Ccl2,CCL4,CXCL2,CXCL3,IL6,SERPINE1,SPI1	1	Chemotaxis of leukocytes	0% (0/1)
2.646	9	1	miR-155-5p (miRNAs w/seed UAAUGCU)	7	Ccl2,CCL4,CXCL2,CXCL3,IL6,SERPINE1,SPI1	1	Chemotaxis	0% (0/1)
2.646	9	1	miR-155-5p (miRNAs w/seed UAAUGCU)	7	Ccl2,CCL4,CXCL2,CXCL3,IL6,SERPINE1,SPI1	1	Homing of leukocytes	0% (0/1)
2.646	9	1	3M-001	7	CCL2,CCL4,CD80,CD83,CD86,CXCL10,IL6	1	Activation of leukocytes	100% (1/1)
2.646	9	1	3M-001	7	CCL2,CCL4,CD80,CD83,CD86,CXCL10,IL6	1	Quantity of lymphatic system cells	0% (0/1)
2.646	9	1	GNAI3	7	CCL1,CCL2,CCL3L3,CCL4,CXCL3,IL6,SPP1	1	Ion homeostasis of cells	0% (0/1)
2.646	9	1	BSG	7	CCL3L3,CXCL3,CXCL6,IL18,PLAU,PLAUR,SERPINE1	1	Cell movement of granulocytes	100% (1/1)
2.646	9	1	PLAUR	7	C5AR1,Ccl2,CCL2,CTSB,CXCL3,CYBB,PLAU	1	Cell movement of granulocytes	100% (1/1)
2.646	9	1	CCR5	7	Ccl2,CCL4,CXCL10,CXCL2,CXCL3,IL6,SERPINA1	1	Cellular infiltration by myeloid cells	100% (1/1)
2.646	9	1	IL5	7	AREG,CCL2,CCL22,CCR5,NDRG1,SEMA4A,TNFRSF9	1	Cell movement of macrophages	100% (1/1)
2.646	9	1	PLAU	7	CCL2,CCR5,CXCL3,F3,FCGR1A,IL6,NPY	1	Flux of ion	0% (0/1)
2.646	9	1	PLAU	7	CCL2,CCR5,CXCL3,F3,FCGR1A,IL6,NPY	1	Flux of Ca2+	0% (0/1)
2.646	9	1	trinitrobenzenesulfonic acid	7	CCL4,CCR5,CD44,CXCL2,IL18,IL6,TAC1	1	Production of reactive oxygen species	0% (0/1)
2.646	9	1	C3	7	C3AR1,C5AR1,CCL2,CCL3L3,CCL4,CXCL3,LCN2	1	Degranulation of cells	100% (1/1)
2.646	9	1	CCR5	7	Ccl2,CCL4,CXCL10,CXCL2,CXCL3,IL6,SERPINA1	1	Cellular infiltration by phagocytes	100% (1/1)
2.646	9	1	C3	7	C3AR1,C5AR1,CCL2,CCL3L3,CCL4,CXCL3,LCN2	1	Degranulation	100% (1/1)
2.646	9	1	PLAU	7	CCL2,CCR5,CXCL3,F3,FCGR1A,IL6,NPY	1	Flux of inorganic cation	0% (0/1)
2.598	14	1	RBL2	12	AURKA,BUB1,BUB1B,CASP6,CCNA2,CCNB1,CDK1,KIFC1,MYBL2,PIM1,PLK1,RRM2	1	Cell viability	0% (0/1)
2.598	14	1	Tnf (family)	12	C3AR1,CCL1,Ccl2,CCL2,CCL4,CCR5,CD4,CXCL10,CXCL3,INHBA,LCN2,SERPINE1	1	Chemotaxis of myeloid cells	0% (0/1)
2.598	14	1	APOE	12	C3AR1,C5AR1,Ccl2,CCR5,CD80,CD86,CSF2RB,CTSS,FCGR2B,HMOX1,IL6,MSR1	1	Response of mononuclear leukocytes	100% (1/1)
2.598	14	1	Ccl2	12	Ccl9,CCR5,CTSB,CXCL10,CXCL2,CXCL3,CYBB,FABP4,IGF1,IL6,KDR,SPP1	1	Invasive tumor	100% (1/1)
2.593	20	1	IL15	18	CCL17,Ccl2,CCL2,CCL4,CD44,CD74,CD80,CD86,CXCL10,CXCL2,HMOX1,IL6,ITGAX,KIT,P2RY6,SERPINE1,TNFRSF9,TYROBP	1	Migration of phagocytes	100% (1/1)
2.582	17	1	NR3C1	15	CCL17,CCL2,CCL22,CCL4,CPB2,CXCL3,CXCL6,IL18,IL6,ITGB2,LCN2,NPY,SPP1,TAC1,TNFRSF9	1	Activation of granulocytes	0% (0/1)
2.582	17	1	thioacetamide	15	BHLHE40,CD14,CD44,CLDN4,ELF3,IGF1,IL6,KDR,LCN2,LGALS3,MMP14,ODC1,SLC7A11,SPP1,TGFBR1	1	Invasion of cells	0% (0/1)
2.582	17	1	cigarette smoke	15	C3,Ccl2,CCL2,CCL3L3,CCL4,CXCL10,CXCL2,CXCL3,HMOX1,IL6,KDR,MMP12,P2RY6,SERPINE1,TGFBR1	1	Migration of phagocytes	0% (0/1)
2.582	17	1	APP	15	C3,Ccl2,CCL2,CCL3L3,CCL4,CD74,CXCL10,CXCL2,CXCL3,CXCL6,FCGR2A,IL18,LBP,LGALS3,PENK	1	Chemotaxis of granulocytes	100% (1/1)
2.558	24	1	RELA	22	APOE,C3,Ccl2,CCL2,CCL22,CD14,CD44,CD80,CFTR,CHI3L1,CXCL10,CXCL3,CXCL6,CYBB,HMOX1,IGF1,IL1RN,IL6,PTGES,TAC1,TBX21,TREM1	1	Activation of phagocytes	0% (0/1)
2.558	24	1	RELA	22	APOE,C3,Ccl2,CCL2,CCL22,CD14,CD44,CD80,CFTR,CHI3L1,CXCL10,CXCL3,CXCL6,CYBB,HMOX1,IGF1,IL1RN,IL6,KIT,PTGES,TAC1,TREM1	1	Activation of myeloid cells	0% (0/1)
2.53	12	1	C5	10	C5AR1,Ccl2,CCL2,CXCL10,CXCL2,CXCL3,F3,FCGR2A,IL6,ITGB2	1	Accumulation of granulocytes	100% (1/1)
2.53	12	1	MOG	10	C5AR1,Ccl2,CCL3L3,Ccl7,CCR5,CD44,CXCL10,CXCL2,IGF1,IL6	1	Chemotaxis	0% (0/1)
2.53	12	1	salmonella minnesota R595 lipopolysaccharides	10	Ccl2,CD80,CD83,CD86,CXCL10,CXCL6,HLA-DQA1,HLA-DRA,IL6,Tnfsf9	1	Homeostasis of leukocytes	0% (0/1)
2.53	12	1	salmonella minnesota R595 lipopolysaccharides	10	Ccl2,CD80,CD83,CD86,CXCL10,CXCL6,HLA-DQA1,HLA-DRA,IL6,Tnfsf9	1	Homeostasis of blood cells	0% (0/1)
2.5	6	1	CYBB	4	Ccl2,CCL2,CXCL10,IL6	1	Activation of macrophages	100% (1/1)
2.5	6	1	CYBB	4	Ccl2,CXCL10,CYBA,IL6	1	Phagocytosis	100% (1/1)
2.5	6	1	CYBA	4	CYBB,IL6,PIM1,SERPINE1	1	Angiogenesis	100% (1/1)
2.5	18	1	PI3K (complex)	16	Ccl2,CCL2,CCL4,CD44,CNR2,CXCL10,CYBB,IL6,ITGB2,KDR,LCN2,SERPINE1,SPI1,SPP1,THBS1,TREM1	1	Homing of leukocytes	100% (1/1)
2.5	6	1	LILRB4	4	CLEC4E,CXCL10,CXCL11,IL6	1	Inflammatory response	100% (1/1)
2.496	15	1	Jnk	13	Ccl2,CCL2,CCL4,CD44,CXCL3,CXCL6,F3,HMOX1,IL6,MMP14,PLAU,PLAUR,SERPINE1	1	Migration of myeloid cells	100% (1/1)
2.496	15	1	CpG oligonucleotide	13	Ccl2,CCL3L3,CCL4,Ccl9,CCR8,CD80,CD86,CXCL10,CXCL2,IL18,IL6,ITGAX,SERPINE1	1	Migration of phagocytes	100% (1/1)
2.496	15	1	TCR	13	APOE,CCL1,CCL17,CCL22,CCL3L3,CCL4,CCR5,CCR8,CXCL10,CXCL11,IL6,SPP1,VAV1	1	Quantity of metal	100% (1/1)
2.475	10	1	PF4	8	CCL2,CCL22,CCL4,CD86,CXCL3,IL1RN,IL6,INHBA	1	Activation of phagocytes	100% (1/1)
2.475	10	1	PF4	8	CCL2,CCL22,CCL4,CD86,CXCL3,IL1RN,IL6,INHBA	1	Activation of myeloid cells	100% (1/1)
2.475	10	1	wortmannin	8	Ccl2,CCL2,CCL4,CD44,CXCL10,HMOX1,PLAU,SERPINE1	1	Migration of antigen presenting cells	0% (0/1)
2.475	10	1	tyrphostin AG490	8	A2M,Ccl2,CCL2,CXCL2,IGF1,IGF2,IL6,SPP1	1	Chemotaxis	0% (0/1)
2.475	10	1	Fibrinogen	8	Ccl2,CCL2,CCL3L3,CCL4,CXCL3,F3,IL6,MMP14	1	Cell movement of leukocytes	100% (1/1)
2.475	10	1	Fibrinogen	8	Ccl2,CCL2,CCL3L3,CCL4,CXCL3,F3,IL6,MMP14	1	Cell movement of blood cells	100% (1/1)
2.475	10	1	Fibrinogen	8	Ccl2,CCL2,CCL3L3,CCL4,CXCL3,F3,IL6,MMP14	1	Activation of cells	100% (1/1)
2.475	10	1	ciglitazone	8	APOE,CAV1,Ccl2,CCL2,CYBB,ESR1,IL6,SERPINE1	1	Binding of tumor cell lines	0% (0/1)
2.475	10	1	5-hydroxytryptamine	8	CCL2,CYBB,F3,GPR183,IL6,PLCB2,SERPINE1,THBS1	1	Cell movement of leukocytes	100% (1/1)
2.475	10	1	EGLN	8	Ccl2,CCL2,HLA-DQB1,LCN2,OSM,S100A9,SERPINE1,Tnfsf9	1	Cell movement of leukocytes	0% (0/1)
2.475	10	1	CpG ODN 2395	8	Ccl2,CCL3L3,CCL4,CD14,CD86,HMOX1,IGHE,IL6	1	Activation of cells	100% (1/1)
2.475	10	1	EDN1	8	CCL2,CYBB,IL18,IL6,MMP7,PLAU,PLAUR,SERPINE1	1	Migration of granulocytes	0% (0/1)
2.475	10	1	CCL11	8	AIF1,CCL2,CCL3L3,CCL4,CXCL11,CXCL3,CXCL6,IL6	1	Cell movement of lymphocytes	100% (1/1)
2.475	10	1	CCL11	8	AIF1,CCL2,CCL3L3,CCL4,CXCL11,CXCL3,CXCL6,IL6	1	Cell movement of lymphatic system cells	100% (1/1)
2.475	10	1	IFN alpha/beta	8	CD80,CD83,CD86,CXCL10,IL6,TLR5,TNFSF10,TNFSF13	1	Lymphopoiesis	100% (1/1)
2.475	10	1	N-ethyl-N-nitrosourea	8	CCL1,CCL17,CCL2,CXCL2,CXCL6,PF4,SERPINA1,SPP1	1	Chemotaxis of phagocytes	0% (0/1)
2.475	10	1	N-ethyl-N-nitrosourea	8	CCL1,CCL17,CCL2,CXCL2,CXCL6,PF4,SERPINA1,SPP1	1	Chemotaxis of myeloid cells	0% (0/1)
2.475	10	1	N-ethyl-N-nitrosourea	8	CCL1,CCL17,CCL2,CXCL2,CXCL6,PF4,SERPINA1,SPP1	1	Chemotaxis of leukocytes	0% (0/1)
2.475	10	1	N-ethyl-N-nitrosourea	8	CCL1,CCL17,CCL2,CXCL2,CXCL6,PF4,SERPINA1,SPP1	1	Chemotaxis	0% (0/1)
2.475	10	1	N-ethyl-N-nitrosourea	8	CCL1,CCL17,CCL2,CXCL2,CXCL6,PF4,SERPINA1,SPP1	1	Homing of leukocytes	0% (0/1)
2.475	10	1	actinomycin D	8	CCL2,F3,HMOX1,IL6,PLAU,PLAUR,SERPINE1,SPP1	1	Migration of myeloid cells	0% (0/1)
2.475	10	1	ABCG1	8	Ccl2,CCL3L3,CCL4,CCR5,CH25H,CXCL3,IL6,SFTPD	1	Homing of leukocytes	0% (0/1)
2.475	10	1	RIPK2	8	Ccl2,CD86,CLEC4E,CLEC5A,CXCL10,CXCL3,IL6,PTGES	1	Activation of phagocytes	100% (1/1)
2.475	10	1	RIPK2	8	Ccl2,CD86,CLEC4E,CLEC5A,CXCL10,CXCL3,IL6,PTGES	1	Activation of myeloid cells	100% (1/1)
2.475	10	1	phytohemagglutinin	8	C6,CCL1,CCL2,CCL4,CD44,CXCL10,IL6,LBP	1	Activation of macrophages	0% (0/1)
2.475	10	1	ADA	8	ADORA1,CCL17,Ccl2,CXCL2,CXCL3,IL6,SERPINE1,SPP1	1	Chemotaxis of leukocytes	0% (0/1)
2.475	10	1	ADA	8	ADORA1,CCL17,Ccl2,CXCL2,CXCL3,IL6,SERPINE1,SPP1	1	Homing of leukocytes	0% (0/1)
2.475	10	1	ADA	8	CCL17,Ccl2,CXCL2,CXCL3,IL6,MMP12,SERPINE1,SPP1	1	Migration of phagocytes	0% (0/1)
2.475	10	1	ITGAM	8	APOE,C5AR1,Ccl2,CD80,CD86,CXCL10,IL6,LCN2	1	Immune response of leukocytes	100% (1/1)
2.475	10	1	ITGAM	8	APOE,C5AR1,Ccl2,CCL3L3,CCL4,CXCL10,IL6,LCN2	1	Recruitment of phagocytes	100% (1/1)
2.475	10	1	ITGAM	8	APOE,C5AR1,Ccl2,CCL3L3,CCL4,CXCL10,IL6,LCN2	1	Recruitment of granulocytes	100% (1/1)
2.475	10	1	PNPLA2	8	ARG1,IL6,ITGAX,MRC1,MSR1,PPARGC1A,SLC2A1,UCP3	1	Synthesis of reactive oxygen species	0% (0/1)
2.475	10	1	vancomycin	8	C3,CD14,CD44,FCGR2A,HMOX1,LCN2,LGALS3,MRC1	1	Engulfment of phagocytes	0% (0/1)
2.475	10	1	vancomycin	8	C3,CD14,CD44,FCGR2A,HMOX1,LCN2,LGALS3,MRC1	1	Engulfment of myeloid cells	0% (0/1)
2.475	10	1	IL27RA	8	Ccl2,CCL4,CCR5,CD44,CD80,CD86,CXCL10,IL6	1	Interaction of leukocytes	0% (0/1)
2.475	10	1	IL27RA	8	Ccl2,CCL4,CD44,CD80,CD86,CXCL10,IL6,LCN2	1	Activation of myeloid cells	100% (1/1)
2.475	10	1	BAX	8	CDK1,CTSB,CTSH,CTSK,CTSS,CXCL10,IL6,MMP12	1	Migration of cells	100% (1/1)
2.475	10	1	1-palmitoyl-2-oleoylphosphatidylserine	8	CCL1,CCL3L3,CXCL10,CXCL2,CXCL3,IL6,OSM,Tnfsf9	1	Accumulation of leukocytes	0% (0/1)
2.475	10	1	1-palmitoyl-2-oleoylphosphatidylserine	8	CCL1,CCL3L3,CCL4,CXCL10,CXCL3,IL6,OSM,Tnfsf9	1	Lymphocyte migration	0% (0/1)
2.475	10	1	1-palmitoyl-2-oleoylphosphatidylserine	8	CCL1,CCL3L3,CCL4,CXCL10,CXCL3,IL6,OSM,Tnfsf9	1	Migration of lymphatic system cells	0% (0/1)
2.475	10	1	poly rI:rC-RNA	8	C3,CD14,CD44,FCGR1A,FCGR2B,MARCO,PLAUR,THBS1	1	Phagocytosis of antigen presenting cells	100% (1/1)
2.475	10	1	immethridine	8	BTK,C3,CD14,CD44,CTSS,FCGR1A,IL6,SIGLEC1	1	Response of antigen presenting cells	0% (0/1)
2.475	10	1	ciglitazone	8	APOE,CAV1,Ccl2,CCL2,CYBB,ESR1,IL6,SERPINE1	1	Interaction of tumor cell lines	0% (0/1)
2.475	10	1	Hbb-b2	8	C1QA,Ccl2,CCR5,CD44,CD74,CIITA,CXCL10,CYBB	1	Infection of mammalia	0% (0/1)
2.475	10	1	Hbb-b1	8	C1QA,Ccl2,CCR5,CD44,CD74,CIITA,CXCL10,CYBB	1	Infection of mammalia	0% (0/1)
2.449	8	1	TNNI3	6	CCL1,Ccl2,CCL3L3,CCL4,CCR5,CXCL3	1	Cell movement of phagocytes	0% (0/1)
2.449	8	1	TNNI3	6	CCL1,Ccl2,CCL3L3,CCL4,CCR5,CXCL3	1	Cell movement of myeloid cells	0% (0/1)
2.449	8	1	TNNI3	6	CCL1,Ccl2,CCL3L3,CCL4,CCR5,CXCL3	1	Activation of cells	0% (0/1)
2.449	8	1	TNNI3	6	CCL1,Ccl2,CCL3L3,CCL4,CCR5,CXCL3	1	Chemotaxis of leukocytes	0% (0/1)
2.449	8	1	TNNI3	6	CCL1,Ccl2,CCL3L3,CCL4,CCR5,CXCL3	1	Chemotaxis	0% (0/1)
2.449	8	1	TNNI3	6	CCL1,Ccl2,CCL3L3,CCL4,CCR5,CXCL3	1	Lymphocyte migration	0% (0/1)
2.449	8	1	TNNI3	6	CCL1,Ccl2,CCL3L3,CCL4,CCR5,CXCL3	1	Cell movement of antigen presenting cells	0% (0/1)
2.449	8	1	TNNI3	6	CCL1,Ccl2,CCL3L3,CCL4,CCR5,CXCL3	1	Interaction of leukocytes	0% (0/1)
2.449	8	1	TNNI3	6	CCL1,Ccl2,CCL3L3,CCL4,CCR5,CXCL3	1	Migration of lymphatic system cells	0% (0/1)
2.449	8	1	TNNI3	6	CCL1,Ccl2,CCL3L3,CCL4,CCR5,CXCL3	1	Homing of leukocytes	0% (0/1)
2.449	8	1	TNNI3	6	CCL1,Ccl2,CCL3L3,CCL4,CCR5,CXCL3	1	Migration of mononuclear leukocytes	0% (0/1)
2.449	8	1	PRKCA	6	CCL2,CXCL10,CXCL2,CXCL3,CYBB,S100A9	1	Accumulation of leukocytes	0% (0/1)
2.449	8	1	S-(2,3-bispalmitoyloxypropyl)-cysteine-GDPKHPKSF	6	CCL2,CCL4,CD80,CD86,CXCL10,IL6	1	Activation of phagocytes	0% (0/1)
2.449	8	1	S-(2,3-bispalmitoyloxypropyl)-cysteine-GDPKHPKSF	6	CCL2,CCL4,CD80,CD86,CXCL10,IL6	1	Quantity of lymphatic system cells	0% (0/1)
2.449	8	1	S-(2,3-bispalmitoyloxypropyl)-cysteine-GDPKHPKSF	6	CCL2,CCL4,CD80,CD86,CXCL10,IL6	1	Binding of leukocytes	0% (0/1)
2.449	8	1	S-(2,3-bispalmitoyloxypropyl)-cysteine-GDPKHPKSF	6	CCL2,CCL4,CD80,CD86,CXCL10,IL6	1	Interaction of leukocytes	0% (0/1)
2.449	8	1	S-(2,3-bispalmitoyloxypropyl)-cysteine-GDPKHPKSF	6	CCL2,CCL4,CD80,CD86,CXCL10,IL6	1	Adhesion of blood cells	0% (0/1)
2.449	8	1	S-(2,3-bispalmitoyloxypropyl)-cysteine-GDPKHPKSF	6	CCL2,CCL4,CD80,CD86,CXCL10,IL6	1	Activation of myeloid cells	0% (0/1)
2.449	8	1	S-(2,3-bispalmitoyloxypropyl)-cysteine-GDPKHPKSF	6	CCL2,CCL4,CD80,CD86,CXCL10,IL6	1	Activation of antigen presenting cells	0% (0/1)
2.449	8	1	ITGA9	6	Ccl2,CCL3L3,CCL4,CXCL6,IL6,MMP14	1	Cell movement of lymphocytes	100% (1/1)
2.449	8	1	ITGA9	6	Ccl2,CCL3L3,CCL4,CXCL6,IL6,MMP14	1	Cell movement of lymphatic system cells	100% (1/1)
2.449	8	1	ITGA9	6	Ccl2,CCL3L3,CCL4,CXCL6,IL6,MMP14	1	Activation of cells	0% (0/1)
2.449	8	1	ITGA9	6	Ccl2,CCL3L3,CCL4,CXCL6,IL6,MMP14	1	Chemotaxis	100% (1/1)
2.449	8	1	ITGA9	6	Ccl2,CCL3L3,CCL4,CXCL6,IL6,MMP14	1	Migration of phagocytes	0% (0/1)
2.449	8	1	NFKBIZ	6	Ccl2,CCL3L3,CXCL3,IL6,LCN2,S100A9	1	Cellular infiltration by leukocytes	100% (1/1)
2.449	8	1	CGS 21680	6	Ccl2,CCL22,CCL3L3,CCL4,F3,PPARGC1A	1	Migration of cells	100% (1/1)
2.449	8	1	plicamycin	6	CCL2,F3,HMOX1,KDR,PLAUR,SERPINE1	1	Cell movement of myeloid cells	0% (0/1)
2.449	8	1	TRADD	6	BCL2A1,CCL2,CXCL11,CXCL2,CXCL3,IL6	1	Inflammatory response	100% (1/1)
2.449	8	1	CASR	6	CCNB1,CD44,IGFBP3,NUPR1,PTTG1,S100A9	1	Proliferation of connective tissue cells	100% (1/1)
2.449	8	1	miR-146a-5p (and other miRNAs w/seed GAGAACU)	6	CCL2,CXCL3,IL6,LBP,PTAFR,SFTPD	1	Homing of cells	0% (0/1)
2.449	8	1	miR-146a-5p (and other miRNAs w/seed GAGAACU)	6	CCL2,CCNA2,CXCL3,IL6,SFTPD,TLR1	1	Stimulation of cells	0% (0/1)
2.449	8	1	ABCB4	6	Ccl2,CXCL10,LGALS3,SERPINE1,SPP1,STING1	1	Cell movement of phagocytes	100% (1/1)
2.449	8	1	ABCB4	6	Ccl2,CXCL10,LGALS3,SERPINE1,SPP1,STING1	1	Activation of cells	0% (0/1)
2.449	8	1	ABCB4	6	Ccl2,CXCL10,LGALS3,SERPINE1,SPP1,STING1	1	Cell movement of myeloid cells	100% (1/1)
2.449	8	1	ABCB4	6	Ccl2,CXCL10,LGALS3,SERPINE1,SPP1,STING1	1	Cell movement of mononuclear leukocytes	0% (0/1)
2.449	8	1	ABCB4	6	Ccl2,CXCL10,LGALS3,SERPINE1,SPP1,STING1	1	Cell movement of antigen presenting cells	100% (1/1)
2.449	8	1	JAK inhibitor I	6	C3,CXCL10,CXCL11,CXCL2,CXCL3,CXCL6	1	Chemotaxis of leukocytes	0% (0/1)
2.449	8	1	JAK inhibitor I	6	C3,CXCL10,CXCL11,CXCL2,CXCL3,CXCL6	1	Recruitment of leukocytes	0% (0/1)
2.449	8	1	JAK inhibitor I	6	C3,CXCL10,CXCL11,CXCL2,CXCL3,CXCL6	1	Inflammatory response	0% (0/1)
2.449	8	1	JAK inhibitor I	6	C3,CXCL10,CXCL11,CXCL2,CXCL3,CXCL6	1	Chemotaxis	0% (0/1)
2.449	8	1	JAK inhibitor I	6	C3,CXCL10,CXCL11,CXCL2,CXCL3,CXCL6	1	Recruitment of blood cells	0% (0/1)
2.449	8	1	JAK inhibitor I	6	C3,CXCL10,CXCL11,CXCL2,CXCL3,CXCL6	1	Mobilization of Ca2+	0% (0/1)
2.449	8	1	phorbol esters	6	CD44,CXCL6,IL6,OSM,PLAU,SCG2	1	Chemotaxis	100% (1/1)
2.449	8	1	PLG	6	CCL2,IL6,MMP12,PLAU,SERPINE1,VAV1	1	Migration of phagocytes	100% (1/1)
2.449	8	1	ELAVL1	6	CCNE1,CENPA,CTSS,HMOX1,IL6,NCAPG	1	Growth of solid tumor	100% (1/1)
2.449	8	1	PRKAA	6	Ccl2,CXCL10,FASN,IL6,NCF1,PPARGC1A	1	Migration of cells	100% (1/1)
2.449	8	1	ADORA3	6	CCL1,CCL2,CCL4,CXCL3,IL24,SPP1	1	Cell movement of phagocytes	100% (1/1)
2.449	8	1	ADORA3	6	CCL1,CCL2,CCL4,CXCL3,IL24,SPP1	1	Activation of phagocytes	0% (0/1)
2.449	8	1	ADORA3	6	CCL1,CCL2,CCL4,CXCL3,IL24,SPP1	1	Cell movement of myeloid cells	0% (0/1)
2.449	8	1	ADORA3	6	CCL1,CCL2,CCL4,CXCL3,IL24,SPP1	1	Cell movement of antigen presenting cells	100% (1/1)
2.449	8	1	ADORA3	6	CCL1,CCL2,CCL4,CXCL3,IL24,SPP1	1	Activation of myeloid cells	0% (0/1)
2.449	8	1	CYP2E1	6	C3AR1,C5AR1,Ccl2,HMOX1,IL6,NCF1	1	Angiogenesis	0% (0/1)
2.449	8	1	CYP2E1	6	C3AR1,C5AR1,Ccl2,CD14,HMOX1,IL6	1	Quantity of connective tissue	0% (0/1)
2.449	8	1	CYP2E1	6	C3AR1,Ccl2,CD14,HMOX1,IL6,NCF1	1	Phagocytosis	0% (0/1)
2.449	8	1	CYP2E1	6	C3AR1,C5AR1,Ccl2,CD14,HMOX1,IL6	1	Response of mononuclear leukocytes	0% (0/1)
2.449	8	1	SASH1	6	CXCL10,IL18,IL6,INHBA,MARCO,RBL1	1	Organismal death	0% (0/1)
2.449	8	1	hyaluronic acid	6	CCL3L3,CCL4,CD44,CXCL10,CXCL2,CXCL3	1	Mobilization of Ca2+	100% (1/1)
2.449	8	1	CTLA4	6	CD80,CD86,CXCL10,ICOS,ITGAX,TPX2	1	Accumulation of cells	100% (1/1)
2.449	8	1	resveratrol	6	CCL2,CCL3L3,CXCL10,CXCL2,CXCL3,ESR1	1	Mobilization of Ca2+	0% (0/1)
2.449	8	1	KLF6	6	Ccl2,CCL2,CCL3L3,CXCL2,IL6,PLAU	1	Chemotaxis of leukocytes	0% (0/1)
2.449	8	1	lipopolysaccharide	6	C3,C3AR1,C5AR1,CD44,CFB,THBS1	1	Reperfusion injury of kidney	0% (0/1)
2.449	8	1	Pam3-Cys	6	CCL2,CXCL10,CXCL2,CXCL3,IL6,SERPINE1	1	Chemotaxis of leukocytes	0% (0/1)
2.449	8	1	Pam3-Cys	6	CCL2,CXCL10,CXCL2,CXCL3,IL6,SERPINE1	1	Homing of leukocytes	0% (0/1)
2.449	8	1	E. coli serotype 0127B8 lipopolysaccharide	6	Ccl2,CCL2,CD14,HMOX1,IL6,SEMA4A	1	Response of mononuclear leukocytes	0% (0/1)
2.449	8	1	IL11RA	6	CCL17,Ccl2,CCL3L3,CCL4,CXCL3,MMP12	1	Migration of antigen presenting cells	0% (0/1)
2.449	8	1	MALP-2s	6	BCL2A1,CCL3L3,CCL4,CXCL2,CXCL3,IL6	1	Inflammatory response	100% (1/1)
2.449	8	1	MALP-2s	6	CCL3L3,CCL4,CD86,CXCL2,CXCL3,IL6	1	Adhesion of immune cells	0% (0/1)
2.449	8	1	MALP-2s	6	CCL3L3,CCL4,CD86,CXCL2,CXCL3,IL6	1	Interaction of leukocytes	0% (0/1)
2.449	8	1	MALP-2s	6	CCL3L3,CCL4,CD86,CXCL2,CXCL3,IL6	1	Adhesion of blood cells	0% (0/1)
2.449	8	1	SAA	6	CCL17,Ccl2,CCL2,F3,IL6,MRC1	1	Adhesion of immune cells	100% (1/1)
2.449	8	1	SAA	6	CCL17,Ccl2,CCL2,F3,IL6,MRC1	1	Interaction of leukocytes	100% (1/1)
2.449	8	1	SAA	6	CCL17,Ccl2,CCL2,F3,IL6,MRC1	1	Adhesion of blood cells	100% (1/1)
2.449	8	1	TERT	6	CCL1,CCL17,CCL2,CXCL10,CXCL2,CXCL6	1	Mobilization of Ca2+	0% (0/1)
2.449	8	1	NOX4	6	Ccl2,CCL2,CD44,CYBB,HMOX1,SERPINE1	1	Migration of myeloid cells	0% (0/1)
2.449	8	1	3M-011	6	CCL4,CD80,CD83,CD86,CXCL10,IL6	1	Activation of leukocytes	100% (1/1)
2.449	8	1	3M-011	6	CCL4,CD80,CD83,CD86,CXCL10,IL6	1	Quantity of lymphatic system cells	0% (0/1)
2.449	8	1	infliximab	6	CCL17,Ccl2,CTLA4,FCGR2A,TNFRSF4,TNFRSF9	1	Accumulation of leukocytes	0% (0/1)
2.449	8	1	infliximab	6	BATF,CCL17,Ccl2,CTLA4,TNFRSF4,TNFRSF9	1	Cell movement of T lymphocytes	0% (0/1)
2.449	8	1	infliximab	6	Ccl2,CTLA4,MMP12,PTGES,TNFRSF4,TNFRSF9	1	Cellular infiltration by mononuclear leukocytes	0% (0/1)
2.449	8	1	CHRNA7	6	CCL1,Ccl2,CXCL10,CXCL2,CXCL3,IL6	1	Chemotaxis of leukocytes	0% (0/1)
2.449	8	1	CHRNA7	6	CCL1,Ccl2,CXCL10,CXCL2,CXCL3,IL6	1	Binding of leukocytes	0% (0/1)
2.449	8	1	CHRNA7	6	CCL1,Ccl2,CXCL10,CXCL2,CXCL3,IL6	1	Interaction of leukocytes	0% (0/1)
2.449	8	1	CHRNA7	6	CCL1,Ccl2,CXCL10,CXCL2,CXCL3,IL6	1	Adhesion of blood cells	0% (0/1)
2.449	8	1	CHRNA7	6	CCL1,Ccl2,CXCL10,CXCL2,CXCL3,IL6	1	Homing of leukocytes	0% (0/1)
2.449	8	1	TRIM3	6	CCL1,CXCL3,CXCL6,IL6,MMP12,MMP7	1	Migration of phagocytes	0% (0/1)
2.449	8	1	TRIM3	6	CCL1,CXCL3,CXCL6,IL6,MMP12,MMP7	1	Cell movement of blood cells	0% (0/1)
2.449	8	1	PCLAF	6	AURKA,BUB1,CCNB1,ECT2,PLK1,TOP2A	1	Cell survival	0% (0/1)
2.449	8	1	chitin	6	ARG1,CCL17,Ccl2,CCL22,IL6,Retnla	1	Cell movement	100% (1/1)
2.449	8	1	chitin	6	ARG1,CCL17,Ccl2,CCL22,IL6,Retnla	1	Activation of blood cells	100% (1/1)
2.449	8	1	chitin	6	ARG1,CCL17,Ccl2,CCL22,IL6,Retnla	1	Inflammatory response	100% (1/1)
2.449	8	1	IL6	6	CCL2,CCL4,CCR5,CD44,IGF1,SPP1	1	Migration of hepatic stellate cells	0% (0/1)
2.449	8	1	SELPLG	6	CCL2,CCL4,CXCL2,HCK,IGF1,PLAUR	1	Chemotaxis	100% (1/1)
2.449	8	1	SELPLG	6	CCL4,CXCL2,HCK,IGF1,IL1R2,PLAUR	1	Synthesis of reactive oxygen species	100% (1/1)
2.449	8	1	G protein alphai	6	C4A/C4B,CXCL10,FCGR2B,SERPING1,THBS1,TNFRSF12A	1	Organismal death	0% (0/1)
2.449	8	1	ethionine	6	C4A/C4B,CD14,CD44,LCN2,LGALS3,SPP1	1	Activation of phagocytes	0% (0/1)
2.449	8	1	ethionine	6	C4A/C4B,CD14,CD44,LCN2,LGALS3,SPP1	1	Activation of myeloid cells	0% (0/1)
2.449	8	1	EIF4E	6	C3AR1,Ccl2,HLA-DQB1,IL18,LAT2,SLC11A1	1	Activation of T lymphocytes	0% (0/1)
2.449	8	1	EIF4E	6	C3AR1,Ccl2,HLA-DQB1,IL18,LAT2,SLC11A1	1	Activation of lymphoid cells	0% (0/1)
2.449	8	1	MAPK9	6	Ccl2,CCL2,EGF,IL18,IL6,MMP12	1	Migration of phagocytes	0% (0/1)
2.449	8	1	NCF1	6	Ccl2,CD44,F3,HMOX1,IGF1,SERPINE1	1	Growth of lesion	0% (0/1)
2.449	8	1	NCF1	6	Ccl2,CD14,CD44,F3,HMOX1,SERPINE1	1	Cell movement of myeloid cells	100% (1/1)
2.449	8	1	bisindolylmaleimide I	6	CD44,HMOX1,IL6,MMP12,MMP7,SERPINE1	1	Migration of phagocytes	100% (1/1)
2.449	8	1	ADAMTS12	6	CHI3L1,CLEC4E,CXCL10,IL6,LCN2,S100A9	1	Leukocyte migration	0% (0/1)
2.449	8	1	ADAMTS12	6	CHI3L1,CLEC4E,CXCL10,IL6,LCN2,S100A9	1	Cell movement of blood cells	0% (0/1)
2.449	8	1	ADAMTS12	6	CHI3L1,CLEC4E,CXCL10,IL6,LCN2,S100A9	1	Inflammatory response	100% (1/1)
2.449	8	1	NCSTN	6	CD14,CSF2RB,FCGR2A,FCGR2B,Ly6a (includes others),SPI1	1	Binding of leukocytes	0% (0/1)
2.449	8	1	cyclooxygenase	6	ARG1,HMOX1,IGF1,IL6,TAC1,TNN	1	Angiogenesis	100% (1/1)
2.449	8	1	cyclooxygenase	6	ARG1,HMOX1,IGF1,IL6,Retnla,TAC1	1	Activation of macrophages	0% (0/1)
2.449	26	1	resiquimod	24	C3,C3AR1,C4A/C4B,Ccl2,CCL2,CCL22,CCL3L3,CCL4,CD44,CD83,CLEC4E,CXCL10,FCGR1A,FCGR2A,FCGR2B,GPR84,HCK,IL18,IL6,SOD2,SPI1,SPP1,TNFRSF9,TNFSF10	1	Hypersensitive reaction	0% (0/1)
2.449	8	1	miR-125b-5p (and other miRNAs w/seed CCCUGAG)	6	Ccl2,CCR5,CD44,IL6,LCP1,SGPL1	1	T cell migration	0% (0/1)
2.449	8	1	Mek	6	APOE,Ccl2,CXCL10,IL6,SERPINE1,THBS1	1	Recruitment of granulocytes	0% (0/1)
2.449	8	1	MEOX2	6	CCL2,CXCL2,CXCL3,CXCL6,IL6,MMP14	1	Chemotaxis	0% (0/1)
2.449	8	1	MEOX2	6	CCL2,CXCL2,CXCL3,CXCL6,IL6,MMP14	1	Migration of phagocytes	0% (0/1)
2.449	8	1	MEOX2	6	CCL2,CXCL2,CXCL3,F3,IL6,PTX3	1	Accumulation of granulocytes	0% (0/1)
2.449	8	1	STING1	6	ARG1,CCL4,CD86,CXCL10,IL6,LCN2	1	Activation of leukocytes	100% (1/1)
2.449	8	1	MAP2K1/2	6	C3,Ccl2,CCL3L3,CCL4,CXCL3,HMOX1	1	Cell movement of macrophages	0% (0/1)
2.449	8	1	MAP2K1/2	6	C3,Ccl2,CCL3L3,CCL4,CXCL3,HMOX1	1	Migration of myeloid cells	0% (0/1)
2.449	8	1	MAP2K1/2	6	C3,Ccl2,CCL3L3,CCL4,CXCL3,HMOX1	1	Migration of antigen presenting cells	0% (0/1)
2.449	8	1	MAP2K1/2	6	C3,Ccl2,CCL3L3,CCL4,CHI3L1,CXCL3	1	Recruitment of myeloid cells	0% (0/1)
2.449	8	1	MAP2K1/2	6	C3,Ccl2,CCL3L3,CCL4,CXCL3,HMOX1	1	Migration of phagocytes	0% (0/1)
2.449	8	1	icilin	6	Ccl2,CCL3L3,CCL4,CXCL10,CXCL2,IL6	1	Cellular infiltration by leukocytes	0% (0/1)
2.449	8	1	icilin	6	Ccl2,CCL3L3,CCL4,CXCL10,CXCL2,IL6	1	Cellular infiltration by blood cells	0% (0/1)
2.449	8	1	icilin	6	Ccl2,CCL3L3,CCL4,CXCL10,CXCL2,IL6	1	Chemotaxis of leukocytes	0% (0/1)
2.449	8	1	icilin	6	Ccl2,CCL3L3,CCL4,CXCL10,CXCL2,IL6	1	Cellular infiltration	0% (0/1)
2.449	8	1	icilin	6	Ccl2,CCL3L3,CCL4,CXCL10,CXCL2,IL6	1	Chemotaxis	0% (0/1)
2.449	8	1	icilin	6	Ccl2,CCL3L3,CCL4,CXCL10,CXCL2,IL6	1	Recruitment of phagocytes	0% (0/1)
2.449	8	1	icilin	6	Ccl2,CCL3L3,CCL4,CXCL10,CXCL2,IL6	1	Binding of leukocytes	0% (0/1)
2.449	8	1	icilin	6	Ccl2,CCL3L3,CCL4,CXCL10,CXCL2,IL6	1	Interaction of leukocytes	0% (0/1)
2.449	8	1	icilin	6	Ccl2,CCL3L3,CCL4,CXCL10,CXCL2,IL6	1	Adhesion of blood cells	0% (0/1)
2.449	8	1	icilin	6	Ccl2,CCL3L3,CCL4,CXCL10,CXCL2,IL6	1	Homing of leukocytes	0% (0/1)
2.449	8	1	icilin	6	Ccl2,CCL3L3,CCL4,CXCL10,CXCL2,IL6	1	Recruitment of myeloid cells	0% (0/1)
2.449	8	1	icilin	6	Ccl2,CCL3L3,CCL4,CXCL10,CXCL2,IL6	1	Migration of phagocytes	0% (0/1)
2.449	8	1	platelet activating factor	6	CCL2,IL6,MMP14,PLAU,PLAUR,SERPINE1	1	Proliferation of connective tissue cells	0% (0/1)
2.449	8	1	tetradecanoylphorbol acetate	6	CCL2,CCL4,CD44,IGF1,NCF1,SPP1	1	Migration of hepatic stellate cells	0% (0/1)
2.449	8	1	Ni2+	6	CCL2,CXCL2,CXCL3,CXCL6,IL6,NDRG1	1	Cell movement of leukocytes	0% (0/1)
2.449	8	1	PTPRJ	6	CCL3L3,CCL4,CXCL2,CXCL3,IL18,IL6	1	Cellular infiltration by leukocytes	0% (0/1)
2.449	8	1	PTPRJ	6	CCL3L3,CCL4,Ccl7,CXCL3,IL18,IL6	1	Cell movement of lymphatic system cells	0% (0/1)
2.449	8	1	PTPRJ	6	CCL3L3,CCL4,Ccl7,CXCL3,IL18,IL6	1	Flux of Ca2+	0% (0/1)
2.449	8	1	ETV5	6	CAV1,CHI3L1,LCN2,LYZ,SFTPA1,SPP1	1	Quantity of metal	0% (0/1)
2.449	8	1	CITED2	6	C5AR1,CD80,CD86,FCGR2B,FOXP3,IL6	1	Differentiation of T lymphocytes	0% (0/1)
2.449	8	1	BHLHE40	6	C3AR1,CAPG,CD14,FCGR2B,MARCO,SLAMF7	1	Phagocytosis by macrophages	0% (0/1)
2.449	8	1	PDGF BB	6	AREG,C3,CCNE1,IL6,ODC1,PLAU	1	Liver Regeneration	0% (0/1)
2.449	8	1	AREG	6	BIRC5,CENPA,IL6,MKI67,PLK1,RRM2	1	Growth of solid tumor	100% (1/1)
2.449	8	1	CSF2	6	Ccl2,IL6,ODC1,OSM,RRM2,TPX2	1	Growth of liver tumor	0% (0/1)
2.449	8	1	E. coli B5 lipopolysaccharide	6	CCL2,CCL4,CCR5,CD44,NCF1,SPP1	1	Migration of hepatic stellate cells	0% (0/1)
2.449	8	1	CpG ODN 1826	6	CD83,CIITA,CXCL10,FCGR2B,HLA-DQB1,IL6	1	Quantity of CD4+ T-lymphocytes	0% (0/1)
2.449	8	1	E. coli lipopolysaccharide	6	CCL2,CCL4,CXCL3,IL18,S100A9,TREM1	1	Degranulation of leukocytes	100% (1/1)
2.412	13	1	ZBTB10	11	CARD9,CCL1,CCL4,CD80,CD86,CLEC5A,CXCL10,CXCL3,CYBB,IL1RN,IL6	1	Activation of phagocytes	0% (0/1)
2.412	13	1	RETN	11	Ccl2,CCL2,FABP5,FASN,HMOX1,IL6,MKI67,MMP14,NPY,SERPINE1,SPP1	1	Quantity of connective tissue	100% (1/1)
2.412	13	1	CSF1	11	C5AR1,Ccl2,CCL2,Ccl7,CXCL2,CXCL3,FCGR2A,IL18,IL6,IRF5,SPP1	1	Accumulation of granulocytes	0% (0/1)
2.412	13	1	STAT1	11	C3,Ccl2,CCL2,CCL3L3,CCL4,CXCL10,CXCL2,CXCL3,IL18,LCN2,PF4	1	Chemotaxis of neutrophils	0% (0/1)
2.412	13	1	NFAT5	11	Ccl2,CCL2,CD44,CD74,CXCL10,CXCL3,CYBB,IL6,LCN2,PTGES,SPP1	1	Chemotaxis	0% (0/1)
2.412	13	1	NFAT5	11	Ccl2,CCL2,CD44,CD74,CXCL10,CXCL3,CYBB,IL6,LCN2,PTGES,SPP1	1	Homing of leukocytes	0% (0/1)
2.412	13	1	ANGPT2	11	Ccl2,CCL3L3,CD86,CYBB,HMOX1,IL18,IL6,ITGAX,MMP7,PLAU,SERPINE1	1	Migration of phagocytes	100% (1/1)
2.405	16	1	FOS	14	C3AR1,CCL2,Ccl7,CD14,CD44,CHI3L1,CXCL10,CXCL3,F3,IL6,LGALS3,SERPINE1,SPP1,TAC1	1	Recruitment of phagocytes	0% (0/1)
2.405	16	1	imiquimod	14	Ccl2,CCL22,CCL3L3,CCL4,CXCL10,CXCL2,CXCL3,CXCL6,HCK,IL18,IL6,ITGB2,LCN2,S100A9	1	Chemotaxis of leukocytes	100% (1/1)
2.405	16	1	imiquimod	14	Ccl2,CCL22,CCL3L3,CCL4,CXCL10,CXCL2,CXCL3,CXCL6,HCK,IL18,IL6,ITGB2,LCN2,S100A9	1	Homing of leukocytes	100% (1/1)
2.405	16	1	CD3	14	CCL1,CCL17,CCL22,CCL3L3,CCL4,CCR5,CD44,CD74,CD80,CD86,CXCL10,HLA-DQB1,IL6,TNFRSF9	1	Migration of phagocytes	0% (0/1)
2.405	16	1	ERBB2	14	ALOX15,BHLHE40,CCL2,CXCL10,CXCL3,F3,IL6,LCN2,LGALS3,PLAU,PLAUR,SERPINE1,THBS1,TREM1	1	Immune response of leukocytes	0% (0/1)
2.405	16	1	cardiotoxin	14	C5AR1,CCL1,CCL17,Ccl2,CCL2,CCL3L3,CCL4,Ccl9,CCR5,CSF2RB,CXCL10,IL18,PIGR,SPP1	1	Cell movement of dendritic cells	0% (0/1)
2.333	11	1	YAP1	9	Ccl2,CCL22,CXCL2,CXCL3,HP,INHBA,ITGB2,SERPINE1,THBS1	1	Chemotaxis of phagocytes	0% (0/1)
2.333	11	1	YAP1	9	Ccl2,CCL22,CXCL2,CXCL3,HP,INHBA,ITGB2,SERPINE1,THBS1	1	Chemotaxis of myeloid cells	0% (0/1)
2.333	11	1	SOST	9	ACP5,Ccl2,CCL3L3,CCL4,CTSK,FABP4,FASN,PPARGC1A,SOD2	1	Migration of cells	0% (0/1)
2.333	11	1	PTGS1	9	ARG1,Ccl2,CYBB,FABP4,GEM,IL6,NCF1,PTGER2,PTGES	1	Angiogenesis	100% (1/1)
2.333	11	1	CD3 group	9	CCNE1,FASN,FOXP3,HAVCR2,HK2,ODC1,PDCD1,SLC7A5,TBX21	1	Organismal death	0% (0/1)
2.333	11	1	CD3 group	9	ACSL4,CCNE1,FASN,HAVCR2,HK2,ODC1,PDCD1,SLC16A3,SLC7A5	1	Growth of tumor	0% (0/1)
2.333	11	1	dextran sulfate	9	Ccl2,CXCL10,CXCL2,CXCL3,EGF,IL18,IL6,P2RY2,S100A9	1	Accumulation of granulocytes	0% (0/1)
2.333	11	1	IL1	9	APOE,BHLHE40,Ccl2,CCL2,CSF2RB,CXCL11,HMOX1,IL6,TNFRSF4	1	Response of mononuclear leukocytes	100% (1/1)
2.333	11	1	Pka	9	AREG,CAV1,CCNB1,CD44,DUSP4,HMOX1,IGF1,IL6,SPI1	1	Growth of connective tissue	0% (0/1)
2.324	17	1	MED1	15	AURKA,BIRC5,CCNE1,CDC6,CDK1,CENPA,FASN,IGF1,IGFBP3,IRF4,ODC1,OLR1,PIM1,PLK1,THBS1	1	Growth of tumor	0% (0/1)
2.309	14	1	CD40LG	12	CCL17,CCL2,CCL22,CCL4,CCR5,CXCL10,GCH1,IL6,PLAU,PLAUR,RGS1,TNFRSF11A	1	Quantity of metal	0% (0/1)
2.309	5	1	C3	3	CXCL10,CXCL3,LCN2	1	Immune response of neutrophils	100% (1/1)
2.309	5	1	IL6	3	C3,C5AR1,CD44	1	Increased Levels of Creatinine	100% (1/1)
2.309	5	1	CFB	3	C3,C4A/C4B,C5AR1	1	Increased Levels of Blood Urea Nitrogen	100% (1/1)
2.268	9	1	valsartan	7	Ccl2,CTSS,CYBB,F3,IL6,SERPINE1,SPP1	1	Migration of myeloid cells	0% (0/1)
2.268	9	1	valsartan	7	Ccl2,CTSS,CYBB,F3,IL6,SERPINE1,SPP1	1	Transmigration of cells	0% (0/1)
2.268	9	1	CXCL12	7	CD14,CD4,CD44,CXCL10,IL6,PLAU,THBS1	1	Phagocytosis of cells	0% (0/1)
2.268	9	1	carrageenan	7	Ccl2,CCL3L3,CXCL2,CXCL3,ESR1,IL6,PTGES	1	Cellular infiltration by leukocytes	100% (1/1)
2.268	9	1	CARD9	7	C3,C5AR1,CCR5,CXCL10,CXCL3,FCGR1A,IL6	1	Response of phagocytes	0% (0/1)
2.268	9	1	CARD9	7	C3,C5AR1,CCR5,CXCL10,CXCL2,CXCL3,FCGR1A	1	Mobilization of Ca2+	0% (0/1)
2.268	9	1	CARD9	7	C3,C5AR1,CCR5,CXCL10,CXCL3,FCGR1A,IL6	1	Response of myeloid cells	0% (0/1)
2.268	9	1	IL17RA	7	Ccl2,CXCL2,CXCL3,CXCL6,IL6,MMP12,S100A9	1	Migration of phagocytes	100% (1/1)
2.268	9	1	IL17RA	7	Ccl2,CXCL2,CXCL3,CXCL6,IL6,MMP12,S100A9	1	Cell movement of blood cells	100% (1/1)
2.268	9	1	thapsigargin	7	C5AR1,Ccl2,CCL3L3,CXCL10,CXCL2,CXCL3,ITGB2	1	Chemotaxis of granulocytes	0% (0/1)
2.268	9	1	TGFB1	7	CCL2,CCL4,CCR5,CD44,IGF1,NCF1,SPP1	1	Migration of hepatic stellate cells	0% (0/1)
2.268	9	1	4-methylnitrosoamino-1-(3-pyridinyl)-1-butanone	7	FASN,HP,IL6,LCP1,PTGES,SERPINA1,SPP1	1	Cell movement of leukocytes	100% (1/1)
2.268	9	1	Notch	7	CARD9,FCGR2A,FCGR2B,IDH1,IL6,NCF1,PLAU	1	Synthesis of reactive oxygen species	0% (0/1)
2.268	9	1	Notch	7	CAPG,CSF2RB,FCGR2A,FCGR2B,IDH1,IL6,PLAU	1	Engulfment of cells	0% (0/1)
2.268	9	1	miR-16-5p (and other miRNAs w/seed AGCAGCA)	7	ANLN,E2F3,HMOX1,IGF1,IL6,PLK1,SLC7A1	1	Cell viability	100% (1/1)
2.268	9	1	ICAM1	7	CCL3L3,CCL4,CD80,CD86,CXCL2,CXCL3,IL6	1	Adhesion of immune cells	100% (1/1)
2.268	9	1	ICAM1	7	CCL3L3,CCL4,CD80,CD86,CXCL2,CXCL3,IL6	1	Interaction of leukocytes	100% (1/1)
2.268	9	1	ICAM1	7	CCL3L3,CCL4,CD80,CD86,CXCL2,CXCL3,IL6	1	Adhesion of blood cells	100% (1/1)
2.268	9	1	eplerenone	7	Ccl2,CYBA,CYBB,LGALS3,NCF1,SERPINE1,SPP1	1	Angiogenesis	100% (1/1)
2.268	9	1	LAMA4	7	CAV1,Ccl7,IGF1,IL18,SPP1,THBS1,THBS2	1	Inflammatory response	0% (0/1)
2.268	9	1	LAMA4	7	CAV1,Ccl7,IGF1,IL18,SPP1,THBS1,THBS2	1	Chemotaxis	0% (0/1)
2.268	9	1	F3	7	AREG,Ccl2,CCL2,IL6,MMP7,SERPINE1,TNFRSF11A	1	Growth of tumor	100% (1/1)
2.268	9	1	CBL	7	CCL3L3,CSF2RB,CXCL2,CXCL3,HMOX1,IL6,VAV1	1	Migration of phagocytes	0% (0/1)
2.268	9	1	UTP	7	Ccl2,CCL2,CD14,F3,SERPINE1,SPP1,THBS1	1	Cell movement of leukocytes	100% (1/1)
2.268	9	1	UTP	7	Ccl2,CCL2,CD14,F3,SERPINE1,SPP1,THBS1	1	Cell movement of myeloid cells	100% (1/1)
2.268	9	1	UTP	7	Ccl2,CCL2,CD14,F3,SERPINE1,SPP1,THBS1	1	Recruitment of phagocytes	0% (0/1)
2.268	9	1	UTP	7	Ccl2,CCL2,CD14,F3,SERPINE1,SPP1,THBS1	1	Binding of tumor cell lines	100% (1/1)
2.268	9	1	UTP	7	Ccl2,CCL2,CD14,F3,SERPINE1,SPP1,THBS1	1	Recruitment of myeloid cells	0% (0/1)
2.268	9	1	C3	7	C3AR1,C5AR1,CCL2,CCL3L3,CCL4,CXCL3,LCN2	1	Degranulation of myeloid cells	100% (1/1)
2.268	9	1	C3	7	C3AR1,C5AR1,CCL2,CCL3L3,CCL4,CXCL3,LCN2	1	Degranulation of phagocytes	100% (1/1)
2.268	9	1	C5AR1	7	C3,Ccl2,CD80,CD86,FCGR2A,IGF1,IL6	1	Experimental autoimmune encephalomyelitis	0% (0/1)
2.268	9	1	MEOX2	7	CCL2,CXCL2,CXCL3,CXCL6,F3,IL6,MMP14	1	Cancer of cells	100% (1/1)
2.25	18	1	LDL	16	APOE,C3,Ccl2,CCL2,CCL4,Ccl7,CXCL10,CXCL11,CXCL2,CXCL3,CXCL6,CYBB,GPR183,IL6,PLAU,SERPINE1	1	Chemotaxis of leukocytes	100% (1/1)
2.25	18	1	SRC	16	CAV1,CCL2,CCNE1,CDK1,CKM,CTSB,CXCL10,F3,HCN4,IL6,PLAU,PLAUR,PLK1,SLC2A1,SPP1,TNFRSF11A	1	Neoplasia of cells	100% (1/1)
2.236	7	1	SUPT20H	5	BCL2A1,CCL1,CCL4,ICOS,IL6	1	Cellular homeostasis	100% (1/1)
2.236	7	1	NX-13	5	Ccl2,CCL2,CCL3L3,CXCL2,IL6	1	Cellular infiltration by leukocytes	100% (1/1)
2.236	7	1	NX-13	5	Ccl2,CCL2,CCL3L3,CXCL2,IL6	1	Cellular infiltration by blood cells	100% (1/1)
2.236	7	1	NX-13	5	Ccl2,CCL2,CCL3L3,CXCL2,IL6	1	Chemotaxis of leukocytes	0% (0/1)
2.236	7	1	NX-13	5	Ccl2,CCL2,CCL3L3,CXCL2,IL6	1	Cellular infiltration	100% (1/1)
2.236	7	1	NX-13	5	Ccl2,CCL2,CCL3L3,CXCL2,IL6	1	Chemotaxis	0% (0/1)
2.236	7	1	NX-13	5	Ccl2,CCL2,CCL3L3,CXCL2,IL6	1	Recruitment of phagocytes	0% (0/1)
2.236	7	1	NX-13	5	Ccl2,CCL2,CCL3L3,CXCL2,IL6	1	Adhesion of immune cells	0% (0/1)
2.236	7	1	NX-13	5	Ccl2,CCL2,CCL3L3,CXCL2,IL6	1	Interaction of leukocytes	0% (0/1)
2.236	7	1	NX-13	5	Ccl2,CCL2,CCL3L3,CXCL2,IL6	1	Adhesion of blood cells	0% (0/1)
2.236	7	1	NX-13	5	Ccl2,CCL2,CCL3L3,CXCL2,IL6	1	Homing of leukocytes	0% (0/1)
2.236	7	1	NX-13	5	Ccl2,CCL2,CCL3L3,CXCL2,IL6	1	Recruitment of granulocytes	0% (0/1)
2.236	7	1	NX-13	5	Ccl2,CCL2,CCL3L3,CXCL2,IL6	1	Migration of phagocytes	0% (0/1)
2.236	7	1	PLAT	5	CCL3L3,CXCL10,IL6,INHBA,SERPINE1	1	Cell movement of mononuclear leukocytes	0% (0/1)
2.236	7	1	PLAT	5	CCL3L3,CXCL10,IL6,INHBA,SERPINE1	1	Activation of cells	100% (1/1)
2.236	7	1	PLAT	5	CCL3L3,CXCL10,IL6,INHBA,SERPINE1	1	Chemotaxis of leukocytes	0% (0/1)
2.236	7	1	PLAT	5	CCL3L3,CXCL10,IL6,INHBA,SERPINE1	1	Chemotaxis	100% (1/1)
2.236	7	1	PLAT	5	CCL3L3,CXCL10,IL6,INHBA,SERPINE1	1	Homing of leukocytes	0% (0/1)
2.236	7	1	L2HGDH	5	AIF1,CCL3L3,CCL4,CYBB,ITGAX	1	Migration of cells	0% (0/1)
2.236	7	1	bempedoic acid	5	CCL1,CCL2,CCL4,CXCL10,IL6	1	Cell movement of T lymphocytes	0% (0/1)
2.236	7	1	bempedoic acid	5	CCL1,CCL2,CCL4,CXCL10,IL6	1	Migration of lymphatic system cells	0% (0/1)
2.236	7	1	bempedoic acid	5	CCL1,CCL2,CCL4,CXCL10,IL6	1	Activation of macrophages	0% (0/1)
2.236	7	1	bempedoic acid	5	CCL1,CCL2,CCL4,CXCL10,IL6	1	Chemotaxis of leukocytes	0% (0/1)
2.236	7	1	bempedoic acid	5	CCL1,CCL2,CCL4,CXCL10,IL6	1	Chemotaxis	0% (0/1)
2.236	7	1	bempedoic acid	5	CCL1,CCL2,CCL4,CXCL10,IL6	1	Quantity of metal	0% (0/1)
2.236	7	1	bempedoic acid	5	CCL1,CCL2,CCL4,CXCL10,IL6	1	Binding of leukocytes	0% (0/1)
2.236	7	1	bempedoic acid	5	CCL1,CCL2,CCL4,CXCL10,IL6	1	Interaction of leukocytes	0% (0/1)
2.236	7	1	bempedoic acid	5	CCL1,CCL2,CCL4,CXCL10,IL6	1	Adhesion of blood cells	0% (0/1)
2.236	7	1	bempedoic acid	5	CCL1,CCL2,CCL4,CXCL10,IL6	1	Homing of leukocytes	100% (1/1)
2.236	7	1	bempedoic acid	5	CCL1,CCL2,CCL4,CXCL10,IL6	1	Activation of myeloid cells	0% (0/1)
2.236	7	1	bempedoic acid	5	CCL1,CCL2,CCL4,CXCL10,IL6	1	Activation of antigen presenting cells	0% (0/1)
2.236	7	1	bempedoic acid	5	CCL1,CCL2,CCL4,CXCL10,IL6	1	Migration of mononuclear leukocytes	0% (0/1)
2.236	7	1	bempedoic acid	5	CCL1,CCL2,CCL4,CXCL10,IL6	1	Migration of phagocytes	0% (0/1)
2.236	7	1	chelerythrine	5	Ccl2,CXCL3,CYBB,IL6,PIM1	1	Migration of cells	100% (1/1)
2.236	7	1	chelerythrine	5	Ccl2,CYBA,CYBB,IL6,PIM1	1	Angiogenesis	100% (1/1)
2.236	7	1	chelerythrine	5	Ccl2,CXCL3,CYBB,IL6,PIM1	1	Leukopoiesis	0% (0/1)
2.236	7	1	KLF11	5	CCL2,CCL3L3,PLAU,SERPINE1,TGFBR1	1	Migration of granulocytes	0% (0/1)
2.236	7	1	NOD2	5	CCL2,CXCL10,CXCL3,IL6,TNFRSF9	1	Quantity of metal	0% (0/1)
2.236	7	1	CDH1	5	CCL17,CD44,IGFBP3,MMP14,PLAUR	1	Migration of myeloid cells	0% (0/1)
2.236	7	1	salicylic acid	5	CCL4,CXCL10,F3,IL6,OLR1	1	Binding of leukocytes	100% (1/1)
2.236	7	1	salicylic acid	5	CCL4,CXCL10,F3,IL6,OLR1	1	Interaction of leukocytes	100% (1/1)
2.236	7	1	salicylic acid	5	CCL4,CXCL10,F3,IL6,OLR1	1	Adhesion of blood cells	100% (1/1)
2.236	7	1	HRG	5	CD74,CD83,FCGR1A,HLA-DQA1,SPP1	1	Cellular homeostasis	0% (0/1)
2.236	7	1	KLF5	5	ARG1,BIRC5,CCNB1,CDK1,E2F3	1	Proliferation of muscle cells	100% (1/1)
2.236	7	1	parthenolide	5	Ccl2,CCL2,CXCL3,IL6,MITF	1	Leukopoiesis	0% (0/1)
2.236	7	1	parthenolide	5	Ccl2,CCL2,CXCL2,CXCL3,IL6	1	Chemotaxis of leukocytes	0% (0/1)
2.236	7	1	parthenolide	5	Ccl2,CCL2,CXCL2,CXCL3,IL6	1	Homing of leukocytes	0% (0/1)
2.236	7	1	parthenolide	5	Ccl2,CCL2,CXCL2,CXCL3,IL6	1	Accumulation of granulocytes	0% (0/1)
2.236	7	1	edaravone	5	Ccl2,CCL2,CXCL3,FASN,IL6	1	Cellular infiltration by leukocytes	0% (0/1)
2.236	7	1	edaravone	5	Ccl2,CCL2,CXCL3,FASN,IL6	1	Cellular infiltration by blood cells	0% (0/1)
2.236	7	1	edaravone	5	Ccl2,CCL2,CXCL3,FASN,IL6	1	Metastasis	0% (0/1)
2.236	7	1	edaravone	5	Ccl2,CCL2,CXCL3,FASN,IL6	1	Advanced malignant tumor	0% (0/1)
2.236	7	1	edaravone	5	Ccl2,CCL2,CXCL3,FASN,IL6	1	Cellular infiltration	100% (1/1)
2.236	7	1	acetovanillone	5	CCL2,CXCL10,HMOX1,NCF1,SERPINE1	1	Cell movement of phagocytes	0% (0/1)
2.236	7	1	acetovanillone	5	CXCL10,HMOX1,MSR1,NCF1,SERPINE1	1	Infection of mammalia	0% (0/1)
2.236	7	1	PD98059	5	Ccl2,IL6,ODC1,OSM,RRM2	1	Growth of liver tumor	0% (0/1)
2.236	7	1	carbon tetrachloride	5	CCR5,CXCL10,HMOX1,IL6,PTAFR	1	Response of phagocytes	0% (0/1)
2.236	7	1	carbon tetrachloride	5	CCR5,CXCL10,HMOX1,IL6,PTAFR	1	Response of myeloid cells	0% (0/1)
2.236	7	1	IL17RD	5	Ccl2,CXCL3,HP,IL6,S100A9	1	Chemotaxis of leukocytes	0% (0/1)
2.236	7	1	IL17RD	5	Ccl2,CXCL3,HP,IL6,S100A9	1	Cell movement of blood cells	0% (0/1)
2.236	7	1	IL17RD	5	Ccl2,CXCL3,HP,IL6,S100A9	1	Inflammatory response	0% (0/1)
2.236	7	1	IL17RD	5	Ccl2,CXCL3,HP,IL6,S100A9	1	Chemotaxis	0% (0/1)
2.236	7	1	propofol	5	CCL2,CD14,CYBB,IL6,PF4	1	Leukopoiesis	0% (0/1)
2.236	7	1	MAC	5	AREG,CXCL2,PTGER2,SPP1,THBS1	1	Invasion of cells	0% (0/1)
2.236	7	1	CSF1R	5	CCL3L3,IL6,MRC1,MSR1,SPI1	1	Adhesion of immune cells	0% (0/1)
2.236	7	1	CSF1R	5	CCL3L3,IL6,MRC1,MSR1,SPI1	1	Interaction of leukocytes	0% (0/1)
2.236	7	1	CSF1R	5	CCL3L3,IL6,MRC1,MSR1,SPI1	1	Adhesion of blood cells	0% (0/1)
2.236	7	1	CSF1R	5	HMOX1,IL6,MRC1,MSR1,SPI1	1	Phagocytosis of cells	100% (1/1)
2.236	7	1	CSF1R	5	HMOX1,IL6,MRC1,MSR1,SPI1	1	Phagocytosis	100% (1/1)
2.236	7	1	Ccl6	5	Ccl2,CCL3L3,CTSK,CTSS,SERPINA1	1	Cell movement of phagocytes	0% (0/1)
2.236	7	1	Ccl6	5	Ccl2,CCL3L3,CTSK,CTSS,SERPINA1	1	Cell movement of myeloid cells	0% (0/1)
2.236	7	1	IFNG	5	C3,C5AR1,CD44,CFB,IL6	1	Increased Levels of Creatinine	0% (0/1)
2.236	7	1	IFNG	5	C3,C5AR1,CD44,CFB,THBS1	1	Reperfusion injury of kidney	0% (0/1)
2.236	7	1	CEP-1347	5	Ccl2,CCL3L3,CCL4,IL6,PLAU	1	Cellular infiltration by leukocytes	0% (0/1)
2.236	7	1	CEP-1347	5	Ccl2,CCL3L3,CCL4,IL6,PLAU	1	Cellular infiltration by blood cells	0% (0/1)
2.236	7	1	CEP-1347	5	Ccl2,CCL3L3,CCL4,IL6,PLAU	1	Activation of cells	0% (0/1)
2.236	7	1	CEP-1347	5	Ccl2,CCL3L3,CCL4,IL6,PLAU	1	Chemotaxis of leukocytes	0% (0/1)
2.236	7	1	CEP-1347	5	Ccl2,CCL3L3,CCL4,IL6,PLAU	1	Cellular infiltration	0% (0/1)
2.236	7	1	CEP-1347	5	Ccl2,CCL3L3,CCL4,IL6,PLAU	1	Chemotaxis	0% (0/1)
2.236	7	1	CEP-1347	5	Ccl2,CCL3L3,CCL4,IL6,PLAU	1	Adhesion of immune cells	0% (0/1)
2.236	7	1	CEP-1347	5	Ccl2,CCL3L3,CCL4,IL6,PLAU	1	Interaction of leukocytes	0% (0/1)
2.236	7	1	CEP-1347	5	Ccl2,CCL3L3,CCL4,IL6,PLAU	1	Adhesion of blood cells	0% (0/1)
2.236	7	1	CEP-1347	5	Ccl2,CCL3L3,CCL4,IL6,PLAU	1	Homing of leukocytes	0% (0/1)
2.236	7	1	CEP-1347	5	Ccl2,CCL3L3,CCL4,IL6,PLAU	1	Migration of phagocytes	0% (0/1)
2.236	7	1	MALT1	5	CD44,CXCL2,CXCL3,IL6,LCN2	1	Recruitment of phagocytes	0% (0/1)
2.236	7	1	MALT1	5	CD44,CXCL2,CXCL3,IL6,LCN2	1	Recruitment of granulocytes	0% (0/1)
2.236	7	1	TNIP1	5	CD4,CXCL2,CXCL3,LCN2,S100A9	1	Cell movement of leukocytes	100% (1/1)
2.236	7	1	TNIP1	5	CD4,CXCL2,CXCL3,LCN2,S100A9	1	Cell movement of blood cells	100% (1/1)
2.236	7	1	TNIP1	5	CD4,CXCL2,CXCL3,LCN2,S100A9	1	Inflammatory response	100% (1/1)
2.236	7	1	PPP2CA	5	Ccl2,CFB,CXCL10,CXCL3,ICOS	1	Cell movement of granulocytes	0% (0/1)
2.236	7	1	PPP2CA	5	Ccl2,CFB,CXCL10,CXCL3,ICOS	1	Cellular infiltration by myeloid cells	0% (0/1)
2.236	7	1	sodium orthovanadate	5	CCL2,CCNA2,CCNE1,PLAUR,SERPINE1	1	Cell proliferation of fibroblasts	0% (0/1)
2.236	7	1	monophosphoryl lipid A	5	Ccl2,CD80,CD86,CXCL10,IL6	1	Binding of leukocytes	0% (0/1)
2.236	7	1	monophosphoryl lipid A	5	Ccl2,CD80,CD86,CXCL10,IL6	1	Interaction of leukocytes	0% (0/1)
2.236	7	1	monophosphoryl lipid A	5	Ccl2,CD80,CD86,CXCL10,IL6	1	Adhesion of blood cells	0% (0/1)
2.236	7	1	PPT1	5	Ccl2,CCL4,CXCL10,CXCL3,OSM	1	Cell movement of neutrophils	0% (0/1)
2.236	7	1	PPT1	5	Ccl2,CCL4,CXCL10,CXCL3,OSM	1	Cell movement of granulocytes	0% (0/1)
2.236	7	1	PPT1	5	Ccl2,CCL4,CXCL10,CXCL3,OSM	1	Activation of phagocytes	100% (1/1)
2.236	7	1	PPT1	5	Ccl2,CCL4,CXCL10,CXCL3,OSM	1	Inflammatory response	100% (1/1)
2.236	7	1	PPT1	5	Ccl2,CCL4,CXCL10,CXCL3,OSM	1	Cellular infiltration by phagocytes	0% (0/1)
2.236	7	1	PPT1	5	Ccl2,CCL4,CXCL10,CXCL3,OSM	1	Chemotaxis	0% (0/1)
2.236	7	1	PPT1	5	Ccl2,CCL4,CXCL10,CXCL3,OSM	1	Lymphocyte migration	0% (0/1)
2.236	7	1	PPT1	5	Ccl2,CCL4,CXCL10,CXCL3,OSM	1	Recruitment of phagocytes	0% (0/1)
2.236	7	1	PPT1	5	Ccl2,CCL4,CXCL10,CXCL3,OSM	1	Binding of leukocytes	0% (0/1)
2.236	7	1	PPT1	5	Ccl2,CCL4,CXCL10,CXCL3,OSM	1	Migration of lymphatic system cells	0% (0/1)
2.236	7	1	PPT1	5	Ccl2,CCL4,CXCL10,CXCL3,OSM	1	Interaction of leukocytes	0% (0/1)
2.236	7	1	PPT1	5	Ccl2,CCL4,CXCL10,CXCL3,OSM	1	Adhesion of blood cells	0% (0/1)
2.236	7	1	PPT1	5	Ccl2,CCL4,CXCL10,CXCL3,OSM	1	Migration of mononuclear leukocytes	0% (0/1)
2.236	7	1	PPT1	5	Ccl2,CCL4,CXCL10,CXCL3,OSM	1	Cellular infiltration by myeloid cells	0% (0/1)
2.236	7	1	CAT	5	Ccl2,CCL2,IL6,SERPINE1,THBS1	1	Chemotaxis of leukocytes	0% (0/1)
2.236	7	1	CAT	5	Ccl2,CCL2,HMOX1,IL6,THBS1	1	Activation of macrophages	0% (0/1)
2.236	7	1	CAT	5	Ccl2,CCL2,HMOX1,IL6,SERPINE1	1	Migration of phagocytes	100% (1/1)
2.236	7	1	CEBPE	5	CD14,IL18,IL6,LCN2,NCF1	1	Synthesis of reactive oxygen species	100% (1/1)
2.236	7	1	ZNF106	5	C3,C4A/C4B,CXCL10,LGALS3,SLC11A1	1	Activation of phagocytes	0% (0/1)
2.236	7	1	ZNF106	5	C3,C4A/C4B,CXCL10,LGALS3,SLC11A1	1	Activation of myeloid cells	0% (0/1)
2.236	7	1	JQ1	5	BTK,Ccl2,CXCL3,IL6,SPP1	1	Migration of phagocytes	0% (0/1)
2.236	7	1	leukotriene B4	5	Ccl2,CXCL2,F3,IL6,IRF5	1	Recruitment of phagocytes	100% (1/1)
2.236	7	1	leukotriene B4	5	Ccl2,CXCL2,F3,IL6,IRF5	1	Accumulation of granulocytes	0% (0/1)
2.236	7	1	bucladesine	5	C3AR1,IL6,ODC1,OSM,PLAU	1	Liver Regeneration	0% (0/1)
2.236	7	1	xanthine	5	CCR5,MMP14,PLAU,PLAUR,SLC2A1	1	Migration of cells	0% (0/1)
2.236	7	1	xanthine	5	CCR5,MMP14,PLAU,PLAUR,SLC2A1	1	Invasion of cells	100% (1/1)
2.236	7	1	xanthine	5	CCR5,MMP14,PLAU,PLAUR,SLC2A1	1	Synthesis of reactive oxygen species	100% (1/1)
2.236	7	1	TRPV4	5	Ccl2,CXCL10,HMOX1,IL6,THBS1	1	Activation of macrophages	0% (0/1)
2.236	7	1	TRPV4	5	Ccl2,CXCL10,HMOX1,IL6,THBS1	1	Phagocytosis	0% (0/1)
2.236	7	1	TRPV4	5	Ccl2,CCL3L3,CXCL10,IL6,THBS1	1	Cell movement of T lymphocytes	0% (0/1)
2.236	7	1	ECSIT	5	CD44,HMOX1,IL6,PLAUR,SOD2	1	Invasion of cells	0% (0/1)
2.236	7	1	MEX3A	5	AURKA,CD44,CENPA,PLK1,PPARGC1A	1	Growth of tumor	0% (0/1)
2.236	7	1	thioctic acid	5	Ccl2,CCL2,IL18,IL6,MITF	1	Leukopoiesis	0% (0/1)
2.236	7	1	IL1A	5	CCL2,CCL4,CD44,IGF1,SPP1	1	Migration of hepatic stellate cells	0% (0/1)
2.236	7	1	NEUROG1	5	IL6,INHBA,LCP1,PAPPA,THBS1	1	Invasion of cells	0% (0/1)
2.236	7	1	N4BP1	5	CCL3L3,CCL4,CXCL2,CXCL6,IL6	1	Chemotaxis of leukocytes	0% (0/1)
2.236	7	1	N4BP1	5	CCL3L3,CCL4,CXCL2,CXCL6,IL6	1	Recruitment of phagocytes	0% (0/1)
2.236	7	1	N4BP1	5	CCL3L3,CCL4,CXCL2,CXCL6,IL6	1	Inflammatory response	0% (0/1)
2.236	7	1	N4BP1	5	CCL3L3,CCL4,CXCL2,CXCL6,IL6	1	Chemotaxis	0% (0/1)
2.236	7	1	N4BP1	5	CCL3L3,CCL4,CXCL2,CXCL6,IL6	1	Recruitment of myeloid cells	0% (0/1)
2.236	7	1	N4BP1	5	CCL3L3,CCL4,CXCL2,CXCL6,IL6	1	Migration of phagocytes	0% (0/1)
2.236	7	1	IFNA4	5	CD86,CXCL10,CXCL11,IL6,Ly6a (includes others)	1	Binding of leukocytes	0% (0/1)
2.236	7	1	IFNA4	5	CD86,CXCL10,CXCL11,IL6,Ly6a (includes others)	1	Interaction of leukocytes	0% (0/1)
2.236	7	1	IFNA4	5	CD86,CXCL10,CXCL11,IL6,Ly6a (includes others)	1	Adhesion of blood cells	0% (0/1)
2.236	7	1	4-nitroquinoline-1-oxide	5	AURKA,CCNA2,CCNB1,CCNE1,CDK1	1	Growth of connective tissue	100% (1/1)
2.236	7	1	FEM1A	5	Ccl2,CCL4,CXCL10,CXCL2,IL6	1	Cellular infiltration by leukocytes	0% (0/1)
2.236	7	1	FEM1A	5	Ccl2,CCL4,CXCL10,CXCL2,IL6	1	Cellular infiltration by blood cells	0% (0/1)
2.236	7	1	FEM1A	5	Ccl2,CCL4,CXCL10,CXCL2,IL6	1	Chemotaxis of leukocytes	0% (0/1)
2.236	7	1	FEM1A	5	Ccl2,CCL4,CXCL10,CXCL2,IL6	1	Cellular infiltration	0% (0/1)
2.236	7	1	FEM1A	5	Ccl2,CCL4,CXCL10,CXCL2,IL6	1	Chemotaxis	0% (0/1)
2.236	7	1	FEM1A	5	Ccl2,CCL4,CXCL10,CXCL2,IL6	1	Recruitment of phagocytes	0% (0/1)
2.236	7	1	FEM1A	5	Ccl2,CCL4,CXCL10,CXCL2,IL6	1	Binding of leukocytes	0% (0/1)
2.236	7	1	FEM1A	5	Ccl2,CCL4,CXCL10,CXCL2,IL6	1	Interaction of leukocytes	0% (0/1)
2.236	7	1	FEM1A	5	Ccl2,CCL4,CXCL10,CXCL2,IL6	1	Adhesion of blood cells	0% (0/1)
2.236	7	1	FEM1A	5	Ccl2,CCL4,CXCL10,CXCL2,IL6	1	Homing of leukocytes	0% (0/1)
2.236	7	1	FEM1A	5	Ccl2,CCL4,CXCL10,CXCL2,IL6	1	Recruitment of myeloid cells	0% (0/1)
2.236	7	1	FEM1A	5	Ccl2,CCL4,CXCL10,CXCL2,IL6	1	Migration of phagocytes	0% (0/1)
2.236	7	1	phenacetin	5	CD44,ELF3,LCN2,LGALS3,MRC1	1	Immune response of cells	0% (0/1)
2.236	7	1	IL37	5	CCL4,CXCL10,CXCL2,CXCL3,IL6	1	Chemotaxis of leukocytes	0% (0/1)
2.236	7	1	IL37	5	CCL4,CXCL10,CXCL2,CXCL3,IL6	1	Binding of leukocytes	0% (0/1)
2.236	7	1	IL37	5	CCL4,CXCL10,CXCL2,CXCL3,IL6	1	Interaction of leukocytes	0% (0/1)
2.236	7	1	IL37	5	CCL4,CXCL10,CXCL2,CXCL3,IL6	1	Adhesion of blood cells	0% (0/1)
2.236	7	1	IL37	5	CCL4,CXCL10,CXCL2,CXCL3,IL6	1	Homing of leukocytes	0% (0/1)
2.236	7	1	NFkB (family)	5	CCL2,CCL4,CXCL10,IL18,IL6	1	Chemotaxis of leukocytes	0% (0/1)
2.236	7	1	NFkB (family)	5	CCL2,CCL4,CXCL10,IL18,IL6	1	Chemotaxis	0% (0/1)
2.236	7	1	NFkB (family)	5	CCL2,CCL4,CXCL10,IL18,IL6	1	Recruitment of phagocytes	0% (0/1)
2.236	7	1	NFkB (family)	5	CCL2,CCL4,CXCL10,IL18,IL6	1	Binding of leukocytes	0% (0/1)
2.236	7	1	NFkB (family)	5	CCL2,CCL4,CXCL10,IL18,IL6	1	Interaction of leukocytes	0% (0/1)
2.236	7	1	NFkB (family)	5	CCL2,CCL4,CXCL10,IL18,IL6	1	Adhesion of blood cells	0% (0/1)
2.236	7	1	NFkB (family)	5	CCL2,CCL4,CXCL10,IL18,IL6	1	Homing of leukocytes	0% (0/1)
2.236	7	1	NFkB (family)	5	CCL2,CCL4,CXCL10,IL18,IL6	1	Lymphocyte migration	0% (0/1)
2.236	7	1	NFkB (family)	5	CCL2,CCL4,CXCL10,IL18,IL6	1	Recruitment of myeloid cells	0% (0/1)
2.236	7	1	NFkB (family)	5	CCL2,CCL4,CXCL10,IL18,IL6	1	Migration of lymphatic system cells	0% (0/1)
2.236	7	1	NFkB (family)	5	CCL2,CCL4,CXCL10,IL18,IL6	1	Migration of phagocytes	0% (0/1)
2.236	7	1	NFkB (family)	5	CCL2,CCL4,CXCL10,IL18,IL6	1	Activation of macrophages	0% (0/1)
2.236	7	1	MAP3K1	5	HMOX1,PLAU,PLAUR,SERPINE1,THBS1	1	Cell movement of phagocytes	0% (0/1)
2.236	7	1	MAP3K1	5	HMOX1,PLAU,PLAUR,SERPINE1,THBS1	1	Cell movement of myeloid cells	0% (0/1)
2.236	7	1	PGF	5	CCL2,CDK1,EREG,IL6,SERPINE1	1	Proliferation of connective tissue cells	100% (1/1)
2.236	7	1	DYRK1A	5	CDC6,CDK1,MYBL2,SERPINE1,UBE2C	1	Growth of tumor	0% (0/1)
2.236	7	1	CHD1	5	CXCL2,CXCL3,CXCL6,IL6,SOD2	1	Migration of cells	0% (0/1)
2.236	7	1	CHD1	5	BCL2A1,CXCL2,CXCL3,IL6,SOD2	1	Cell viability	0% (0/1)
2.236	7	1	CHD1	5	CXCL2,CXCL3,CXCL6,IL6,SOD2	1	Metastasis	100% (1/1)
2.236	7	1	CHD1	5	BCL2A1,CXCL2,CXCL3,CXCL6,IL6	1	Inflammatory response	0% (0/1)
2.236	7	1	CHD1	5	CXCL2,CXCL3,CXCL6,IL6,SOD2	1	Advanced malignant tumor	100% (1/1)
2.236	7	1	DOCK8	5	CCL4,CXCL10,IL18,IL6,INHBA	1	Activation of macrophages	0% (0/1)
2.236	7	1	DOCK8	5	CCL4,CXCL10,IL18,IL6,INHBA	1	Activation of myeloid cells	0% (0/1)
2.236	7	1	DOCK8	5	CCL4,CXCL10,IL18,IL6,INHBA	1	Activation of antigen presenting cells	0% (0/1)
2.236	7	1	NFATC1	5	CYBB,HMOX1,ICOS,IL6,THBS1	1	Phagocytosis	0% (0/1)
2.236	7	1	GSK2193874	5	Ccl2,CCL3L3,CXCL3,IGF1,IL6	1	Migration of cells	100% (1/1)
2.236	7	1	GSK2193874	5	Ccl2,CCL3L3,CXCL3,IGF1,IL6	1	Activation of cells	0% (0/1)
2.236	7	1	GSK2193874	5	Ccl2,CCL3L3,CXCL3,IGF1,IL6	1	Inflammatory response	0% (0/1)
2.236	7	1	GSK2193874	5	Ccl2,CCL3L3,CXCL3,IGF1,IL6	1	Chemotaxis	0% (0/1)
2.236	7	1	laminaran	5	CCL4,CLEC4E,CXCL10,INHBA,TNFRSF9	1	Activation of phagocytes	0% (0/1)
2.236	7	1	laminaran	5	CCL4,CLEC4E,CXCL10,INHBA,TNFRSF9	1	Cell movement of myeloid cells	0% (0/1)
2.236	7	1	laminaran	5	CCL4,CLEC4E,CXCL10,GPR84,TNFRSF9	1	Hypersensitive reaction	0% (0/1)
2.236	7	1	laminaran	5	CCL4,CLEC4E,CXCL10,INHBA,TNFRSF9	1	Activation of myeloid cells	0% (0/1)
2.236	7	1	MAPK7	5	CXCL10,CXCL2,CXCL3,HMOX1,IL6	1	Migration of phagocytes	0% (0/1)
2.236	7	1	PTGIS	5	CXCL2,CXCL3,CXCL6,IL6,PTGES	1	Cell movement of leukocytes	0% (0/1)
2.236	7	1	PTGIS	5	CXCL2,CXCL3,CXCL6,IL6,PTGES	1	Cell movement of blood cells	0% (0/1)
2.236	7	1	PTGIS	5	CXCL2,CXCL3,CXCL6,IL6,PTGES	1	Inflammatory response	100% (1/1)
2.236	7	1	IFNA1/IFNA13	5	CD80,CD83,CD86,CXCL10,SIGLEC1	1	Activation of leukocytes	100% (1/1)
2.236	7	1	PLCE1	5	Ccl2,CCL2,CXCL2,CXCL3,IL6	1	Cellular infiltration by leukocytes	100% (1/1)
2.236	7	1	PLCE1	5	Ccl2,CCL2,CXCL2,CXCL3,IL6	1	Cellular infiltration by blood cells	100% (1/1)
2.236	7	1	PLCE1	5	Ccl2,CCL2,CXCL2,CXCL3,IL6	1	Metastasis	0% (0/1)
2.236	7	1	PLCE1	5	Ccl2,CCL2,CXCL2,CXCL3,IL6	1	Chemotaxis of leukocytes	0% (0/1)
2.236	7	1	PLCE1	5	Ccl2,CCL2,CXCL2,CXCL3,IL6	1	Advanced malignant tumor	0% (0/1)
2.236	7	1	PLCE1	5	Ccl2,CCL2,CXCL2,CXCL3,IL6	1	Cellular infiltration	100% (1/1)
2.236	7	1	PLCE1	5	Ccl2,CCL2,CXCL2,CXCL3,IL6	1	Chemotaxis	0% (0/1)
2.236	7	1	PLCE1	5	Ccl2,CCL2,CXCL2,CXCL3,IL6	1	Recruitment of phagocytes	0% (0/1)
2.236	7	1	PLCE1	5	Ccl2,CCL2,CXCL2,CXCL3,IL6	1	Adhesion of immune cells	0% (0/1)
2.236	7	1	PLCE1	5	Ccl2,CCL2,CXCL2,CXCL3,IL6	1	Interaction of leukocytes	0% (0/1)
2.236	7	1	PLCE1	5	Ccl2,CCL2,CXCL2,CXCL3,IL6	1	Adhesion of blood cells	0% (0/1)
2.236	7	1	PLCE1	5	Ccl2,CCL2,CXCL2,CXCL3,IL6	1	Homing of leukocytes	0% (0/1)
2.236	7	1	PLCE1	5	Ccl2,CCL2,CXCL2,CXCL3,IL6	1	Recruitment of granulocytes	0% (0/1)
2.236	7	1	PLCE1	5	Ccl2,CCL2,CXCL2,CXCL3,IL6	1	Migration of phagocytes	0% (0/1)
2.236	7	1	PLCE1	5	Ccl2,CCL2,CXCL2,CXCL3,IL6	1	Accumulation of granulocytes	0% (0/1)
2.236	7	1	pentoxifylline	5	Ccl2,CCR5,CXCL3,CYBB,IL6	1	Cellular infiltration by leukocytes	100% (1/1)
2.236	7	1	pentoxifylline	5	Ccl2,CCR5,CXCL3,CYBB,IL6	1	Cellular infiltration by blood cells	100% (1/1)
2.236	7	1	pentoxifylline	5	Ccl2,CCR5,CXCL3,CYBB,IL6	1	Activation of leukocytes	100% (1/1)
2.236	7	1	pentoxifylline	5	Ccl2,CCR5,CXCL3,CYBB,IL6	1	Inflammatory response	100% (1/1)
2.236	7	1	pentoxifylline	5	Ccl2,CCR5,CXCL3,CYBB,IL6	1	Cellular infiltration	100% (1/1)
2.236	7	1	GPER1	5	BHLHE40,ESR1,FASN,IGF1,SLC2A1	1	Organismal death	0% (0/1)
2.236	7	1	GPER1	5	BHLHE40,ESR1,FASN,IGF1,SLC2A1	1	Cell viability	0% (0/1)
2.236	7	1	HSPD1	5	Ccl2,CXCL2,CXCL3,IL6,TBX21	1	Metastasis	0% (0/1)
2.236	7	1	HSPD1	5	Ccl2,CXCL2,CXCL3,IL6,TBX21	1	Advanced malignant tumor	0% (0/1)
2.236	7	1	TSC2	5	Ccl2,CXCL10,HMOX1,LGALS3,PLAU	1	Migration of phagocytes	0% (0/1)
2.236	7	1	TSC2	5	Ccl2,CXCL10,HMOX1,LGALS3,PLAU	1	Migration of antigen presenting cells	0% (0/1)
2.236	7	1	carbon monoxide	5	CCL2,CCL4,IL6,PLAUR,SERPINE1	1	Chemotaxis of leukocytes	0% (0/1)
2.236	7	1	C3	5	C3AR1,C5AR1,CXCL10,CXCL3,LCN2	1	Response of myeloid leukocytes	100% (1/1)
2.236	7	1	lipoteichoic acid	5	CD14,CXCL10,HMOX1,PTAFR,TREM1	1	Response of myeloid leukocytes	0% (0/1)
2.236	7	1	TP63	5	F3,IRF5,P2RY2,THBS1,THBS2	1	Recruitment of antigen presenting cells	0% (0/1)
2.236	7	1	RNASE2	5	CCL2,CCL22,CCL4,CXCL10,OSM	1	Recruitment of antigen presenting cells	0% (0/1)
2.236	7	1	RNASE1	5	CCL2,CCL22,CCL4,CXCL10,OSM	1	Recruitment of antigen presenting cells	0% (0/1)
2.236	7	1	CGS 21680	5	Ccl2,CCL22,CCL3L3,CCL4,F3	1	Recruitment of antigen presenting cells	0% (0/1)
2.236	7	1	CITED2	5	C3,CD86,FCGR2B,IL6,SLAMF7	1	Immune response of antigen presenting cells	0% (0/1)
2.236	7	1	cuprizone	5	CCL3L3,CCL4,CXCL10,GSN,IGF1	1	Quantity of Ca2+	0% (0/1)
2.236	7	1	PRKCA	5	CAV1,CCL2,CXCL10,CXCL3,S100A9	1	Quantity of Ca2+	0% (0/1)
2.236	7	1	MAP2K1/2	5	C3,CCL3L3,CCL4,CHI3L1,CXCL3	1	Quantity of Ca2+	0% (0/1)
2.236	7	1	IL18	5	CCL2,CCL3L3,CCR5,CXCL10,IL6	1	Lung injury	100% (1/1)
2.236	7	1	C3	5	C5AR1,CCL2,CCL3L3,CXCL10,IL6	1	Lung injury	100% (1/1)
2.236	7	1	CORT	5	CCL3L3,CCR5,CXCL10,IL18,IL6	1	Lung injury	0% (0/1)
2.236	7	1	cuprizone	5	CCL3L3,CCL4,CXCL10,GSN,IGF1	1	Quantity of metal ion	0% (0/1)
2.236	7	1	ETV5	5	CAV1,CHI3L1,LYZ,SFTPA1,SPP1	1	Quantity of metal ion	0% (0/1)
2.236	7	1	FKBP10	5	CCL17,CHI3L1,IGF1,SPP1,TAC1	1	Quantity of metal ion	0% (0/1)
2.236	7	1	MAP2K1/2	5	C3,CCL3L3,CCL4,CHI3L1,CXCL3	1	Quantity of metal ion	0% (0/1)
2.236	7	1	ADORA3	5	CCL1,CCL2,CCL4,CXCL3,SPP1	1	Quantity of metal ion	0% (0/1)
2.219	15	1	Ap1	13	C3AR1,CCL2,CCL3L3,CCL4,CD44,IGF1,IL6,KCNN4,MMP7,PLAU,PLAUR,SERPINE1,SFTPD	1	Chemotaxis	0% (0/1)
2.214	12	1	E2F2	10	BIRC5,CCNE1,CDC6,CDK1,IL6,MYBL2,RAD51,RBL1,RRM2,SERPINE1	1	Growth of tumor	0% (0/1)
2.214	12	1	IL4	10	AREG,BIRC5,C3,CCNE1,CNR2,IL1RN,IL6,ODC1,OSM,PLAU	1	Liver Regeneration	0% (0/1)
2.214	12	1	IRAK4	10	CCL17,Ccl2,CD80,CD86,CXCL10,CXCL2,CXCL3,IL6,MARCO,OLR1	1	Binding of leukocytes	0% (0/1)
2.214	12	1	IRAK4	10	CCL17,Ccl2,CD80,CD86,CXCL10,CXCL2,CXCL3,IL6,MARCO,OLR1	1	Interaction of leukocytes	0% (0/1)
2.214	12	1	IRAK4	10	CCL17,Ccl2,CD80,CD86,CXCL10,CXCL2,CXCL3,IL6,MARCO,OLR1	1	Adhesion of blood cells	0% (0/1)
2.214	12	1	zymosan	10	CCL17,Ccl2,CCL22,CCL3L3,CCL4,CD86,CXCL10,CXCL2,CXCL3,IL6	1	Adhesion of immune cells	100% (1/1)
2.214	12	1	zymosan	10	CCL17,Ccl2,CCL22,CCL3L3,CCL4,CD86,CXCL10,CXCL2,CXCL3,IL6	1	Interaction of leukocytes	100% (1/1)
2.214	12	1	zymosan	10	CCL17,Ccl2,CCL22,CCL3L3,CCL4,CD86,CXCL10,CXCL2,CXCL3,IL6	1	Adhesion of blood cells	100% (1/1)
2.214	12	1	E. coli B5 lipopolysaccharide	10	CCL2,CCL22,CXCL2,CXCL3,CYBB,F3,IL18,NCF1,PF4,TREM1	1	Respiratory burst	0% (0/1)
2.183	19	1	CTNNB1	17	CCL2,CCL22,CCL4,Ccl9,CD4,CD44,CXCL10,CXCL2,CXCL3,CXCL6,GNAO1,ITGB2,KIT,LGALS3,PLAUR,TRH,VAV1	1	Mobilization of Ca2+	0% (0/1)
2.121	10	1	semaxinib	8	CCL22,CCL3L3,CCR5,CD4,CXCL10,CXCL11,CXCL2,CXCL3	1	Mobilization of Ca2+	0% (0/1)
2.121	10	1	BCR (complex)	8	CCL4,CD300A,CD44,CD80,CD86,FCGR2B,IL24,IL6	1	Activation of myeloid cells	0% (0/1)
2.121	10	1	paclitaxel	8	ADORA2B,CCL2,CD44,CXCL10,CXCL2,CXCL6,LGALS3,PLAUR	1	Mobilization of Ca2+	0% (0/1)
2.121	10	1	BRD4	8	CD4,CXCL2,CXCL3,IL6,PLAU,SPP1,THBS1,THBS2	1	Chemotaxis of leukocytes	0% (0/1)
2.121	10	1	BRD4	8	CD4,CXCL2,CXCL3,IL6,PLAU,SPP1,THBS1,THBS2	1	Adhesion of immune cells	0% (0/1)
2.121	10	1	BRD4	8	CD4,CXCL2,CXCL3,IL6,PLAU,SPP1,THBS1,THBS2	1	Interaction of leukocytes	0% (0/1)
2.121	10	1	BRD4	8	CD4,CXCL2,CXCL3,IL6,PLAU,SPP1,THBS1,THBS2	1	Adhesion of blood cells	0% (0/1)
2.121	10	1	BRD4	8	CD4,CXCL2,CXCL3,IL6,PLAU,SPP1,THBS1,THBS2	1	Homing of leukocytes	0% (0/1)
2.121	10	1	NGF	8	BIRC5,CALCB,CD80,CD83,CD86,GADD45G,IGF2,TAC1	1	T cell development	0% (0/1)
2.121	10	1	NGF	8	BIRC5,CALCB,CD80,CD83,CD86,GADD45G,IGF2,TAC1	1	T cell homeostasis	0% (0/1)
2.121	10	1	STAT5A	8	CCNE1,ESR1,IGF1,IL24,IL6,MMP7,OSM,SLC2A1	1	Proliferation of connective tissue cells	0% (0/1)
2.121	4	1	OSM	2	IL6,PLAU	1	Liver Regeneration	100% (1/1)
2.121	10	1	EZH2	8	C3,Ccl2,CCR5,CXCL10,CXCL2,IL6,LCN2,PTN	1	Recruitment of granulocytes	0% (0/1)
2.121	10	1	EZH2	8	C3,Ccl2,CCR5,CXCL10,CXCL11,FOXP3,IL6,SATB1	1	Cell movement of T lymphocytes	0% (0/1)
2.121	10	1	ETS1	8	Ccl2,CCL2,CCR8,CD44,HMOX1,PLAU,SERPINE1,SPP1	1	Migration of antigen presenting cells	0% (0/1)
2.121	10	1	monocrotaline	8	BIRC5,Ccl2,CYBB,HMOX1,IL6,SLC41A2,SMAD6,SPP1	1	Angiogenesis	100% (1/1)
2.121	10	1	DUSP1	8	CCL2,CXCL3,IL6,OSM,PLAUR,S100A9,SERPINE1,SOD2	1	Cell proliferation of fibroblasts	100% (1/1)
2.121	10	1	JAK2	8	Ccl2,CCL2,CXCL10,CYBB,ESR1,IL6,OSM,THBS1	1	Binding of tumor cell lines	100% (1/1)
2.121	4	1	CLEC4E	2	Ccl2,IL6	1	Encephalitis	100% (1/1)
2.121	10	1	ANGPT2	8	Ccl2,CD68,CD86,IL18,IL6,ITGAX,NCF1,PTGES	1	Encephalitis	0% (0/1)
2.121	4	1	CLEC4E	2	Ccl2,IL6	1	Myelitis	100% (1/1)
2.121	10	1	ANGPT2	8	Ccl2,CD68,CD86,IL18,IL6,ITGAX,NCF1,PTGES	1	Myelitis	0% (0/1)
2.111	13	1	P38 MAPK	11	CCL2,CCL3L3,CD44,CXCL10,CXCL11,CXCL2,CXCL3,CXCL6,ITGB2,PLAUR,TREM1	1	Mobilization of Ca2+	0% (0/1)
2.111	13	1	CDKN1A	11	BIRC5,CCL2,CCNB1,CCNE1,CDC6,CDK1,CTSB,CTSK,IL6,INHBA,SERPINE1	1	Proliferation of muscle cells	100% (1/1)
2.111	13	1	KITLG	11	AIF1,Ccl2,CCL2,CCL22,CCL3L3,CCL4,CXCL3,FABP5,IL18,IL6,OSM	1	Lymphocyte migration	0% (0/1)
2.041	8	1	THRB	6	CCL17,CCL2,CCL22,CXCL3,IL6,SPP1	1	Activation of granulocytes	0% (0/1)
2.041	8	1	ETS2	6	ANPEP,CTSB,CTSK,HMOX1,PLAU,SPP1	1	Growth of tumor	0% (0/1)
2.041	8	1	gentamicin	6	Ccl2,CCL2,CXCL10,LCN2,LGALS3,SPP1	1	Chemotaxis of neutrophils	0% (0/1)
2.041	8	1	H2AZ1	6	BIRC5,CDCA8,MYBL2,PLK1,TOP2A,TPX2	1	Cell survival	0% (0/1)
2.041	8	1	H2AZ1	6	BIRC5,CKAP2L,MKI67,MYBL2,PLK1,TPX2	1	Growth of tumor	0% (0/1)
2.041	8	1	NR0B2	6	Ccl2,CXCL10,IL6,PIK3R5,SERPINE1,SPP1	1	Chemotaxis of leukocytes	0% (0/1)
2.041	8	1	NR0B2	6	Ccl2,CXCL10,IL6,PIK3R5,SERPINE1,SPP1	1	Homing of leukocytes	0% (0/1)
2.041	8	1	deferoxamine	6	CCL3L3,CCL4,HMOX1,KIT,SERPINE1,SPP1	1	Migration of antigen presenting cells	0% (0/1)
2.041	8	1	8-(4-chlorophenylthio)-guanosine-3', 5'-cyclic monophosphate	6	ALOX15,Ccl2,CCL3L3,Ccl7,IL6,PPARGC1A	1	Inflammatory response	0% (0/1)
2.041	8	1	IL36B	6	CD80,CD83,CD86,CXCL10,IL18,IL6	1	Activation of leukocytes	0% (0/1)
2.041	8	1	IL36B	6	CD80,CD83,CD86,CXCL10,IL18,IL6	1	T cell development	100% (1/1)
2.041	8	1	IL36B	6	CD80,CD83,CD86,CXCL10,IL18,IL6	1	T cell homeostasis	100% (1/1)
2.041	8	1	homocysteine	6	Ccl2,CCL2,CXCL10,F3,HMOX1,IL6	1	Accumulation of cells	0% (0/1)
2.041	8	1	IKBKG	6	C3,Ccl9,CXCL10,CXCL2,CXCL3,CXCL6	1	Mobilization of Ca2+	0% (0/1)
2.041	8	1	WNT1	6	CCN4,GRN,IGF1,KIT,SERPINE1,SPP1	1	Inflammatory response	0% (0/1)
2.041	8	1	CD38	6	CCL22,CD44,CD86,CSF2RB,IL6,LGALS3	1	Adhesion of immune cells	100% (1/1)
2.041	8	1	CD38	6	CCL22,CD44,CD86,CSF2RB,IL6,LGALS3	1	Interaction of leukocytes	100% (1/1)
2.041	8	1	CD38	6	CCL22,CD44,CD86,CSF2RB,IL6,LGALS3	1	Adhesion of blood cells	100% (1/1)
2.041	8	1	CD38	6	CD44,HMMR,IL1R2,IL6,LGALS3,SLC7A5	1	Binding of tumor cell lines	0% (0/1)
2.041	8	1	TNC	6	Ccl2,CCL2,CXCL6,EREG,IL6,MMP14	1	Angiogenesis	100% (1/1)
2.041	8	1	PIK3R1	6	CCL4,CXCL10,GCH1,HMOX1,IL6,PLAU	1	Quantity of metal	100% (1/1)
2.041	8	1	TIRAP	6	CCL4,CXCL10,CXCL2,CXCL3,CXCL6,IL6	1	Recruitment of granulocytes	100% (1/1)
2.041	8	1	ATF4	6	APOE,CCL2,CXCL2,IL6,LGALS3,SLC7A5	1	Binding of tumor cell lines	0% (0/1)
2.041	8	1	CG	6	CCL2,CXCL3,IL18,IL6,SPP1,TAC1	1	Activation of granulocytes	0% (0/1)
2.041	8	1	ST8SIA1	6	C1QA,C3,C3AR1,C4A/C4B,C5AR1,CCNE1	1	Organismal death	100% (1/1)
2.041	8	1	IL13	6	CCL2,CCL4,CCR5,CD44,IGF1,SPP1	1	Migration of hepatic stellate cells	0% (0/1)
2.041	8	1	POU2F2	6	CCR5,GPR183,IL6,KCNN4,SPI1,SPP1	1	Cell movement of leukocytes	0% (0/1)
2.041	8	1	desoxycorticosterone	6	Ccl2,CCR5,CYBB,MMP12,SERPINE1,SPP1	1	Cell movement of macrophages	100% (1/1)
2.021	14	1	AHR	12	CCL1,Ccl2,CCL22,CCR5,CSF2RB,CXCL10,CXCL11,CXCL2,IL6,KIT,SERPINE1,SPP1	1	Migration of phagocytes	0% (0/1)
2.021	14	1	AKT1	12	CCL2,CCL3L3,CCL4,CD4,CD44,CD74,CXCL10,FABP5,IL6,PPARGC1A,SPP1,TNFSF10	1	Hypersensitive reaction	100% (1/1)
2	11	1	SMARCA4	9	CCL2,CD44,CD74,CTSS,F3,IGF1,IL6,SERPINE1,SPP1	1	Transmigration of cells	0% (0/1)
2	6	1	TRPS1	4	BUB1,CCNA2,CDK1,PTTG1	1	Proliferation of connective tissue cells	100% (1/1)
2	6	1	tofacitinib	4	BIRC5,CCL2,CXCL10,IL6	1	Hematopoiesis of mononuclear leukocytes	100% (1/1)
2	11	1	Akt	9	Ccl2,CCL2,CXCL10,LCN2,PTN,SERPINE1,SPP1,THBS1,THBS2	1	Chemotaxis of phagocytes	100% (1/1)
2	11	1	Akt	9	Ccl2,CCL2,CXCL10,LCN2,PTN,SERPINE1,SPP1,THBS1,THBS2	1	Chemotaxis of myeloid cells	0% (0/1)
2	6	1	dicarbethoxydihydrocollidine	4	Ccl2,SPP1,UBD,WNT7B	1	Metastasis	0% (0/1)
2	6	1	dicarbethoxydihydrocollidine	4	Ccl2,SPP1,UBD,WNT7B	1	Advanced malignant tumor	0% (0/1)
2	6	1	roscovitine	4	BIRC5,CCNB1,CD44,TNFRSF4	1	Cell viability	100% (1/1)
2	6	1	TOX	4	HAVCR2,PDCD1,Tcf7,TNFRSF9	1	T cell development	100% (1/1)
2	6	1	TOX	4	HAVCR2,PDCD1,Tcf7,TNFRSF9	1	Lymphopoiesis	100% (1/1)
2	6	1	KLK5	4	CXCL2,IL18,IL6,S100A9	1	Cellular infiltration by leukocytes	100% (1/1)
2	6	1	KLK5	4	CXCL2,IL18,IL6,S100A9	1	Cellular infiltration by blood cells	100% (1/1)
2	6	1	KLK5	4	CXCL2,IL18,IL6,S100A9	1	Chemotaxis of leukocytes	0% (0/1)
2	6	1	KLK5	4	CXCL2,IL18,IL6,S100A9	1	Cellular infiltration	100% (1/1)
2	6	1	KLK5	4	CXCL2,IL18,IL6,S100A9	1	Chemotaxis	0% (0/1)
2	6	1	KLK5	4	CXCL2,IL18,IL6,S100A9	1	Adhesion of immune cells	0% (0/1)
2	6	1	KLK5	4	CXCL2,IL18,IL6,S100A9	1	Interaction of leukocytes	0% (0/1)
2	6	1	KLK5	4	CXCL2,IL18,IL6,S100A9	1	Adhesion of blood cells	0% (0/1)
2	6	1	KLK5	4	CXCL2,IL18,IL6,S100A9	1	Homing of leukocytes	0% (0/1)
2	6	1	KLK5	4	CXCL2,IL18,IL6,S100A9	1	Migration of phagocytes	0% (0/1)
2	6	1	KLK5	4	CXCL2,IL18,IL6,S100A9	1	Accumulation of granulocytes	0% (0/1)
2	6	1	ssRNA40	4	CD80,CD83,CD86,IL6	1	T cell development	0% (0/1)
2	6	1	ssRNA40	4	CD80,CD83,CD86,IL6	1	Lymphopoiesis	0% (0/1)
2	6	1	ssRNA40	4	CD80,CD83,CD86,IL6	1	Quantity of lymphatic system cells	0% (0/1)
2	6	1	C8	4	Ccl2,CCL3L3,CXCL2,CXCL3	1	Cell movement of neutrophils	0% (0/1)
2	6	1	C8	4	Ccl2,CCL3L3,CXCL2,CXCL3	1	Chemotaxis of granulocytes	0% (0/1)
2	6	1	C8	4	Ccl2,CCL3L3,CXCL2,CXCL3	1	Chemotaxis of phagocytes	0% (0/1)
2	6	1	C8	4	Ccl2,CCL3L3,CXCL2,CXCL3	1	Cellular infiltration by leukocytes	0% (0/1)
2	6	1	C8	4	Ccl2,CCL3L3,CXCL2,CXCL3	1	Chemotaxis of myeloid cells	0% (0/1)
2	6	1	C8	4	Ccl2,CCL3L3,CXCL2,CXCL3	1	Recruitment of phagocytes	0% (0/1)
2	6	1	C8	4	Ccl2,CCL3L3,CXCL2,CXCL3	1	Adhesion of immune cells	0% (0/1)
2	6	1	C8	4	Ccl2,CCL3L3,CXCL2,CXCL3	1	Interaction of leukocytes	0% (0/1)
2	6	1	C8	4	Ccl2,CCL3L3,CXCL2,CXCL3	1	Adhesion of blood cells	0% (0/1)
2	6	1	C8	4	Ccl2,CCL3L3,CXCL2,CXCL3	1	Homing of leukocytes	0% (0/1)
2	6	1	C8	4	Ccl2,CCL3L3,CXCL2,CXCL3	1	Accumulation of leukocytes	0% (0/1)
2	6	1	C8	4	Ccl2,CCL3L3,CXCL2,CXCL3	1	Recruitment of granulocytes	0% (0/1)
2	6	1	C8	4	Ccl2,CCL3L3,CXCL2,CXCL3	1	Migration of phagocytes	0% (0/1)
2	6	1	C8	4	Ccl2,CCL3L3,CXCL2,CXCL3	1	Migration of granulocytes	0% (0/1)
2	6	1	C8	4	Ccl2,CCL3L3,CXCL2,CXCL3	1	Transmigration of cells	0% (0/1)
2	6	1	LRBA	4	Ccl2,CCL3L3,CXCL10,IL6	1	Cellular infiltration by mononuclear leukocytes	0% (0/1)
2	6	1	LRBA	4	Ccl2,CCL3L3,CXCL10,IL6	1	Cellular infiltration by blood cells	0% (0/1)
2	6	1	LRBA	4	Ccl2,CCL3L3,CXCL10,IL6	1	Activation of cells	0% (0/1)
2	6	1	LRBA	4	Ccl2,CCL3L3,CXCL10,IL6	1	Chemotaxis of leukocytes	0% (0/1)
2	6	1	LRBA	4	Ccl2,CCL3L3,CXCL10,IL6	1	Cellular infiltration	0% (0/1)
2	6	1	LRBA	4	Ccl2,CCL3L3,CXCL10,IL6	1	Chemotaxis	0% (0/1)
2	6	1	LRBA	4	Ccl2,CCL3L3,CXCL10,IL6	1	Cell movement of T lymphocytes	0% (0/1)
2	6	1	LRBA	4	Ccl2,CCL3L3,CXCL10,IL6	1	Hypersensitive reaction	0% (0/1)
2	6	1	LRBA	4	Ccl2,CCL3L3,CXCL10,IL6	1	Recruitment of phagocytes	0% (0/1)
2	6	1	LRBA	4	Ccl2,CCL3L3,CXCL10,IL6	1	Binding of leukocytes	0% (0/1)
2	6	1	LRBA	4	Ccl2,CCL3L3,CXCL10,IL6	1	Migration of lymphatic system cells	0% (0/1)
2	6	1	LRBA	4	Ccl2,CCL3L3,CXCL10,IL6	1	Interaction of leukocytes	0% (0/1)
2	6	1	LRBA	4	Ccl2,CCL3L3,CXCL10,IL6	1	Adhesion of blood cells	0% (0/1)
2	6	1	LRBA	4	Ccl2,CCL3L3,CXCL10,IL6	1	Homing of leukocytes	0% (0/1)
2	6	1	LRBA	4	Ccl2,CCL3L3,CXCL10,IL6	1	Migration of mononuclear leukocytes	0% (0/1)
2	6	1	LRBA	4	Ccl2,CCL3L3,CXCL10,IL6	1	Recruitment of granulocytes	0% (0/1)
2	6	1	LRBA	4	Ccl2,CCL3L3,CXCL10,IL6	1	Migration of phagocytes	0% (0/1)
2	6	1	Ige	4	CCL2,CCL4,CCR5,SPP1	1	Migration of hepatic stellate cells	0% (0/1)
2	6	1	KDR	4	Ccl2,HMOX1,MMP14,PIM1	1	Quantity of connective tissue	100% (1/1)
2	6	1	ARNT2	4	CD86,FCGR2A,Tnfsf9,TYROBP	1	Experimental autoimmune encephalomyelitis	0% (0/1)
2	6	1	2-mercaptoacetate	4	CXCL2,CXCL3,IGF1,IL6	1	Transport of metal	0% (0/1)
2	6	1	TNFSF14	4	ADORA2B,CD86,IL6,INHBA	1	Differentiation of T lymphocytes	0% (0/1)
2	6	1	Ptprd	4	A2M,BIRC5,CCL2,CDK1	1	Cell viability	0% (0/1)
2	6	1	Ptprd	4	BIRC5,Ccl2,CCL2,GADD45G	1	Leukopoiesis	0% (0/1)
2	6	1	Ptprd	4	BIRC5,Ccl2,CCL2,CDK1	1	Growth of lesion	0% (0/1)
2	6	1	JUN	4	CCL2,CD44,IGF1,SPP1	1	Migration of hepatic stellate cells	0% (0/1)
2	6	1	MAP3K5	4	Ccl2,CYBB,HMOX1,IL6	1	Metastasis	0% (0/1)
2	6	1	MAP3K5	4	Ccl2,CYBB,HMOX1,IL6	1	Advanced malignant tumor	0% (0/1)
2	6	1	MAP3K5	4	Ccl2,CYBB,HMOX1,IL6	1	Angiogenesis	0% (0/1)
2	6	1	MAP3K5	4	Ccl2,CYBB,HMOX1,IL6	1	Growth of lesion	0% (0/1)
2	6	1	MAP3K5	4	Ccl2,CYBB,HMOX1,IL6	1	Infection of mammalia	0% (0/1)
2	6	1	MAP3K5	4	Ccl2,CYBB,HMOX1,IL6	1	Activation of macrophages	0% (0/1)
2	6	1	MAP3K5	4	Ccl2,CYBB,HMOX1,IL6	1	Phagocytosis	0% (0/1)
2	6	1	MAP3K5	4	Ccl2,CYBB,HMOX1,IL6	1	Migration of phagocytes	0% (0/1)
2	6	1	RGMB	4	CXCL2,CXCL3,IL6,LCN2	1	Cellular infiltration by leukocytes	0% (0/1)
2	6	1	RGMB	4	CXCL2,CXCL3,IL6,LCN2	1	Transport of metal	0% (0/1)
2	6	1	RGMB	4	CXCL2,CXCL3,IL6,LCN2	1	Cellular infiltration by blood cells	0% (0/1)
2	6	1	RGMB	4	CXCL2,CXCL3,IL6,LCN2	1	Chemotaxis of leukocytes	0% (0/1)
2	6	1	RGMB	4	CXCL2,CXCL3,IL6,LCN2	1	Cellular infiltration	0% (0/1)
2	6	1	RGMB	4	CXCL2,CXCL3,IL6,LCN2	1	Chemotaxis	0% (0/1)
2	6	1	RGMB	4	CXCL2,CXCL3,IL6,LCN2	1	Recruitment of phagocytes	0% (0/1)
2	6	1	RGMB	4	CXCL2,CXCL3,IL6,LCN2	1	Homing of leukocytes	0% (0/1)
2	6	1	RGMB	4	CXCL2,CXCL3,IL6,LCN2	1	Recruitment of granulocytes	0% (0/1)
2	6	1	DMH1	4	CAV1,Ccl9,IL18,INHBA	1	Cell movement of phagocytes	0% (0/1)
2	6	1	IRF7	4	Ccl2,CXCL10,IL6,IRF5	1	Recruitment of phagocytes	0% (0/1)
2	6	1	IRF7	4	Ccl2,CXCL10,FCGR1A,IL6	1	Phagocytosis	100% (1/1)
2	6	1	IRF7	4	CXCL10,FCGR1A,IL6,TLR8	1	Immune response of myeloid cells	0% (0/1)
2	6	1	SYVN1	4	CD44,F3,IL18,OLR1	1	Adhesion of immune cells	0% (0/1)
2	6	1	SYVN1	4	F3,IL18,KCNN4,SLC16A1	1	Flux of inorganic cation	0% (0/1)
2	6	1	C7	4	Ccl2,CCL3L3,CXCL2,CXCL3	1	Cell movement of neutrophils	0% (0/1)
2	6	1	C7	4	Ccl2,CCL3L3,CXCL2,CXCL3	1	Chemotaxis of granulocytes	0% (0/1)
2	6	1	C7	4	Ccl2,CCL3L3,CXCL2,CXCL3	1	Chemotaxis of phagocytes	0% (0/1)
2	6	1	C7	4	Ccl2,CCL3L3,CXCL2,CXCL3	1	Cellular infiltration by leukocytes	0% (0/1)
2	6	1	C7	4	Ccl2,CCL3L3,CXCL2,CXCL3	1	Chemotaxis of myeloid cells	0% (0/1)
2	6	1	C7	4	Ccl2,CCL3L3,CXCL2,CXCL3	1	Recruitment of phagocytes	0% (0/1)
2	6	1	C7	4	Ccl2,CCL3L3,CXCL2,CXCL3	1	Adhesion of immune cells	0% (0/1)
2	6	1	C7	4	Ccl2,CCL3L3,CXCL2,CXCL3	1	Interaction of leukocytes	0% (0/1)
2	6	1	C7	4	Ccl2,CCL3L3,CXCL2,CXCL3	1	Adhesion of blood cells	0% (0/1)
2	6	1	C7	4	Ccl2,CCL3L3,CXCL2,CXCL3	1	Homing of leukocytes	0% (0/1)
2	6	1	C7	4	Ccl2,CCL3L3,CXCL2,CXCL3	1	Accumulation of leukocytes	0% (0/1)
2	6	1	C7	4	Ccl2,CCL3L3,CXCL2,CXCL3	1	Recruitment of granulocytes	0% (0/1)
2	6	1	C7	4	Ccl2,CCL3L3,CXCL2,CXCL3	1	Migration of phagocytes	0% (0/1)
2	6	1	C7	4	Ccl2,CCL3L3,CXCL2,CXCL3	1	Migration of granulocytes	0% (0/1)
2	6	1	C7	4	Ccl2,CCL3L3,CXCL2,CXCL3	1	Transmigration of cells	0% (0/1)
2	11	1	SREBF1	9	C5AR1,CCL17,CD14,CXCL10,FABP5,HMOX1,IL6,LGALS3,SERPINE1	1	Recruitment of leukocytes	0% (0/1)
2	6	1	fingolimod phosphate	4	CCL2,IL6,SERPINE1,THBS1	1	Cell movement of mononuclear leukocytes	100% (1/1)
2	6	1	fingolimod phosphate	4	CCL2,IL6,SERPINE1,THBS1	1	Recruitment of phagocytes	0% (0/1)
2	6	1	fingolimod phosphate	4	CCL2,IL6,SERPINE1,THBS1	1	Chemotaxis of leukocytes	0% (0/1)
2	6	1	fingolimod phosphate	4	CCL2,IL6,SERPINE1,THBS1	1	Chemotaxis	0% (0/1)
2	6	1	fingolimod phosphate	4	CCL2,IL6,SERPINE1,THBS1	1	Recruitment of granulocytes	0% (0/1)
2	6	1	fingolimod phosphate	4	CCL2,IL6,SERPINE1,THBS1	1	Homing of leukocytes	0% (0/1)
2	6	1	fingolimod phosphate	4	CCL2,IL6,SERPINE1,THBS1	1	Binding of tumor cell lines	0% (0/1)
2	6	1	D-sphingosine	4	Ccl2,CXCL2,IL6,SERPINE1	1	Chemotaxis of leukocytes	0% (0/1)
2	6	1	D-sphingosine	4	Ccl2,CXCL2,IL6,SERPINE1	1	Recruitment of phagocytes	0% (0/1)
2	6	1	D-sphingosine	4	Ccl2,CXCL2,IL6,SERPINE1	1	Inflammatory response	0% (0/1)
2	6	1	D-sphingosine	4	Ccl2,CXCL2,IL6,SERPINE1	1	Angiogenesis	0% (0/1)
2	6	1	D-sphingosine	4	Ccl2,CXCL2,IL6,SERPINE1	1	Chemotaxis	100% (1/1)
2	6	1	D-sphingosine	4	Ccl2,CXCL2,IL6,SERPINE1	1	Recruitment of granulocytes	0% (0/1)
2	6	1	D-sphingosine	4	Ccl2,CXCL2,IL6,SERPINE1	1	Binding of tumor cell lines	0% (0/1)
2	6	1	D-sphingosine	4	Ccl2,CXCL2,IL6,SERPINE1	1	Migration of phagocytes	0% (0/1)
2	6	1	FFAR3	4	CD80,CXCL10,FCGR2B,GPR183	1	T cell development	0% (0/1)
2	6	1	FFAR3	4	CD80,CXCL10,FCGR2B,GPR183	1	T cell homeostasis	0% (0/1)
2	6	1	FFAR3	4	CCL22,CD80,CXCL10,FCGR2B	1	Accumulation of blood cells	0% (0/1)
2	6	1	PADI2	4	CXCL2,CXCL3,CXCL6,IL6	1	Chemotaxis of leukocytes	0% (0/1)
2	6	1	PADI2	4	CXCL2,CXCL3,CXCL6,IL6	1	Recruitment of phagocytes	0% (0/1)
2	6	1	PADI2	4	CXCL2,CXCL3,CXCL6,IL6	1	Inflammatory response	0% (0/1)
2	6	1	PADI2	4	CXCL2,CXCL3,CXCL6,IL6	1	Metastasis	0% (0/1)
2	6	1	PADI2	4	CXCL2,CXCL3,CXCL6,IL6	1	Chemotaxis	0% (0/1)
2	6	1	PADI2	4	CXCL2,CXCL3,CXCL6,IL6	1	Recruitment of granulocytes	0% (0/1)
2	6	1	PADI2	4	CXCL2,CXCL3,CXCL6,IL6	1	Migration of phagocytes	0% (0/1)
2	6	1	MIW815	4	CCL2,CCL4,CXCL10,IL6	1	Cellular infiltration by mononuclear leukocytes	0% (0/1)
2	6	1	MIW815	4	CCL2,CCL4,CXCL10,IL6	1	Cellular infiltration by blood cells	0% (0/1)
2	6	1	MIW815	4	CCL2,CCL4,CXCL10,IL6	1	Activation of macrophages	0% (0/1)
2	6	1	MIW815	4	CCL2,CCL4,CXCL10,IL6	1	Chemotaxis of leukocytes	0% (0/1)
2	6	1	MIW815	4	CCL2,CCL4,CXCL10,IL6	1	Quantity of lymphatic system cells	0% (0/1)
2	6	1	MIW815	4	CCL2,CCL4,CXCL10,IL6	1	Cellular infiltration	0% (0/1)
2	6	1	MIW815	4	CCL2,CCL4,CXCL10,IL6	1	Chemotaxis	0% (0/1)
2	6	1	MIW815	4	CCL2,CCL4,CXCL10,IL6	1	Cell movement of T lymphocytes	0% (0/1)
2	6	1	MIW815	4	CCL2,CCL4,CXCL10,IL6	1	Quantity of metal	0% (0/1)
2	6	1	MIW815	4	CCL2,CCL4,CXCL10,IL6	1	Recruitment of phagocytes	0% (0/1)
2	6	1	MIW815	4	CCL2,CCL4,CXCL10,IL6	1	Binding of leukocytes	0% (0/1)
2	6	1	MIW815	4	CCL2,CCL4,CXCL10,IL6	1	Migration of lymphatic system cells	0% (0/1)
2	6	1	MIW815	4	CCL2,CCL4,CXCL10,IL6	1	Interaction of leukocytes	0% (0/1)
2	6	1	MIW815	4	CCL2,CCL4,CXCL10,IL6	1	Adhesion of blood cells	0% (0/1)
2	6	1	MIW815	4	CCL2,CCL4,CXCL10,IL6	1	Homing of leukocytes	0% (0/1)
2	6	1	MIW815	4	CCL2,CCL4,CXCL10,IL6	1	Activation of myeloid cells	0% (0/1)
2	6	1	MIW815	4	CCL2,CCL4,CXCL10,IL6	1	Activation of antigen presenting cells	0% (0/1)
2	6	1	MIW815	4	CCL2,CCL4,CXCL10,IL6	1	Migration of mononuclear leukocytes	0% (0/1)
2	6	1	MIW815	4	CCL2,CCL4,CXCL10,IL6	1	Recruitment of myeloid cells	0% (0/1)
2	6	1	MIW815	4	CCL2,CCL4,CXCL10,IL6	1	Migration of phagocytes	0% (0/1)
2	6	1	IFNA2	4	CCL2,CIITA,CXCL10,IRF5	1	Recruitment of antigen presenting cells	0% (0/1)
2	6	1	GLIS2	4	C3,Ccl2,MMP14,SERPINE1	1	Quantity of connective tissue	0% (0/1)
2	6	1	GLIS2	4	C3,Ccl2,CXCL10,SERPINE1	1	Infection of mammalia	0% (0/1)
2	6	1	Irgm1	4	Ccl2,IL6,NCAPG,RRM2	1	Growth of liver tumor	0% (0/1)
2	6	1	TLR7/8	4	CCL2,EREG,GEM,PLAUR	1	Angiogenesis	0% (0/1)
2	6	1	obeticholic acid	4	Ccl2,CXCL2,CXCL3,IL6	1	Cellular infiltration by leukocytes	0% (0/1)
2	6	1	obeticholic acid	4	CXCL2,CXCL3,IL6,SMAD6	1	Cell survival	0% (0/1)
2	6	1	obeticholic acid	4	Ccl2,CXCL2,CXCL3,IL6	1	Metastasis	0% (0/1)
2	6	1	obeticholic acid	4	Ccl2,CXCL2,CXCL3,IL6	1	Chemotaxis of leukocytes	0% (0/1)
2	6	1	obeticholic acid	4	Ccl2,CXCL2,CXCL3,IL6	1	Advanced malignant tumor	0% (0/1)
2	6	1	obeticholic acid	4	Ccl2,CXCL2,CXCL3,IL6	1	Cellular infiltration by blood cells	0% (0/1)
2	6	1	obeticholic acid	4	Ccl2,CXCL2,CXCL3,IL6	1	Chemotaxis	0% (0/1)
2	6	1	obeticholic acid	4	Ccl2,CXCL2,CXCL3,IL6	1	Recruitment of phagocytes	0% (0/1)
2	6	1	obeticholic acid	4	Ccl2,CXCL2,CXCL3,IL6	1	Adhesion of immune cells	0% (0/1)
2	6	1	obeticholic acid	4	Ccl2,CXCL2,CXCL3,IL6	1	Interaction of leukocytes	0% (0/1)
2	6	1	obeticholic acid	4	Ccl2,CXCL2,CXCL3,IL6	1	Adhesion of blood cells	0% (0/1)
2	6	1	obeticholic acid	4	Ccl2,CXCL2,CXCL3,IL6	1	Homing of leukocytes	0% (0/1)
2	6	1	obeticholic acid	4	Ccl2,CXCL2,CXCL3,IL6	1	Recruitment of granulocytes	0% (0/1)
2	6	1	obeticholic acid	4	Ccl2,CXCL2,CXCL3,IL6	1	Migration of phagocytes	0% (0/1)
2	6	1	obeticholic acid	4	Ccl2,CXCL2,CXCL3,IL6	1	Accumulation of granulocytes	0% (0/1)
2	6	1	Ikb	4	CCL2,CFB,CXCL3,IL6	1	Cellular infiltration by leukocytes	0% (0/1)
2	6	1	Ikb	4	CCL2,CFB,CXCL3,IL6	1	Cellular infiltration by blood cells	0% (0/1)
2	6	1	Ikb	4	CCL2,CCNB1,CXCL3,IL6	1	Cell viability	0% (0/1)
2	6	1	Ikb	4	CCL2,CFB,CXCL3,IL6	1	Cellular infiltration	0% (0/1)
2	6	1	Ikb	4	CCL2,CCNB1,CXCL3,IL6	1	Cell proliferation of fibroblasts	0% (0/1)
2	6	1	JMF3086	4	Ccl2,CXCL2,CXCL3,IL6	1	Cellular infiltration by leukocytes	100% (1/1)
2	6	1	JMF3086	4	Ccl2,CXCL2,CXCL3,IL6	1	Cellular infiltration by blood cells	100% (1/1)
2	6	1	JMF3086	4	Ccl2,CXCL2,CXCL3,IL6	1	Metastasis	0% (0/1)
2	6	1	JMF3086	4	Ccl2,CXCL2,CXCL3,IL6	1	Chemotaxis of leukocytes	0% (0/1)
2	6	1	JMF3086	4	Ccl2,CXCL2,CXCL3,IL6	1	Advanced malignant tumor	0% (0/1)
2	6	1	JMF3086	4	Ccl2,CXCL2,CXCL3,IL6	1	Cellular infiltration	100% (1/1)
2	6	1	JMF3086	4	Ccl2,CXCL2,CXCL3,IL6	1	Chemotaxis	0% (0/1)
2	6	1	JMF3086	4	Ccl2,CXCL2,CXCL3,IL6	1	Recruitment of phagocytes	0% (0/1)
2	6	1	JMF3086	4	Ccl2,CXCL2,CXCL3,IL6	1	Adhesion of immune cells	0% (0/1)
2	6	1	JMF3086	4	Ccl2,CXCL2,CXCL3,IL6	1	Interaction of leukocytes	0% (0/1)
2	6	1	JMF3086	4	Ccl2,CXCL2,CXCL3,IL6	1	Adhesion of blood cells	0% (0/1)
2	6	1	JMF3086	4	Ccl2,CXCL2,CXCL3,IL6	1	Homing of leukocytes	0% (0/1)
2	6	1	JMF3086	4	Ccl2,CXCL2,CXCL3,IL6	1	Recruitment of granulocytes	0% (0/1)
2	6	1	JMF3086	4	Ccl2,CXCL2,CXCL3,IL6	1	Migration of phagocytes	0% (0/1)
2	6	1	JMF3086	4	Ccl2,CXCL2,CXCL3,IL6	1	Accumulation of granulocytes	0% (0/1)
2	6	1	IFRD1	4	IGF1,PTTG1,SPP1,TK1	1	Organismal death	0% (0/1)
2	6	1	IFRD1	4	CTSZ,IGF1,PTTG1,SPP1	1	Migration of cells	0% (0/1)
2	6	1	IFRD1	4	CTSZ,IGF1,PTTG1,SPP1	1	Metastasis	0% (0/1)
2	6	1	IFRD1	4	CTSZ,IGF1,PTTG1,SPP1	1	Advanced malignant tumor	0% (0/1)
2	6	1	IFRD1	4	CTSZ,IGF1,PTTG1,SPP1	1	Invasion of cells	0% (0/1)
2	6	1	mir-182	4	ARG1,CCL2,CHI3L1,Retnla	1	Activation of macrophages	0% (0/1)
2	6	1	mir-182	4	ARG1,CCL2,CHI3L1,Retnla	1	Activation of myeloid cells	0% (0/1)
2	6	1	Ifnar	4	C3,Ccl2,CXCL10,IL6	1	Phagocytosis	0% (0/1)
2	6	1	ENTPD1	4	CD86,CXCL2,CXCL3,SERPINE1	1	Transmigration of cells	0% (0/1)
2	6	1	1-chloro-2,4-dinitrobenzene	4	Ccl2,CCL4,IL24,IL6	1	Activation of T lymphocytes	0% (0/1)
2	6	1	1-chloro-2,4-dinitrobenzene	4	Ccl2,CCL4,IL24,IL6	1	Activation of lymphoid cells	0% (0/1)
2	6	1	1-chloro-2,4-dinitrobenzene	4	Ccl2,CCL4,IL1R2,IL6	1	Binding of tumor cell lines	0% (0/1)
2	6	1	IL-17f dimer	4	CCL2,CCL4,IL6,LCN2	1	Cellular infiltration by leukocytes	0% (0/1)
2	6	1	IL-17f dimer	4	CCL2,CCL4,IL6,LCN2	1	Cellular infiltration by blood cells	0% (0/1)
2	6	1	IL-17f dimer	4	CCL2,CCL4,IL6,LCN2	1	Activation of macrophages	0% (0/1)
2	6	1	IL-17f dimer	4	CCL2,CCL4,IL6,LCN2	1	Chemotaxis of leukocytes	0% (0/1)
2	6	1	IL-17f dimer	4	CCL2,CCL4,IL6,LCN2	1	Cellular infiltration	0% (0/1)
2	6	1	IL-17f dimer	4	CCL2,CCL4,IL6,LCN2	1	Chemotaxis	0% (0/1)
2	6	1	IL-17f dimer	4	CCL2,CCL4,IL6,LCN2	1	Quantity of metal	0% (0/1)
2	6	1	IL-17f dimer	4	CCL2,CCL4,IL6,LCN2	1	Recruitment of phagocytes	0% (0/1)
2	6	1	IL-17f dimer	4	CCL2,CCL4,IL6,LCN2	1	Homing of leukocytes	0% (0/1)
2	6	1	IL-17f dimer	4	CCL2,CCL4,IL6,LCN2	1	Activation of granulocytes	0% (0/1)
2	6	1	IL-17f dimer	4	CCL2,CCL4,IL6,LCN2	1	Activation of antigen presenting cells	0% (0/1)
2	6	1	IL-17f dimer	4	CCL2,CCL4,IL6,LCN2	1	Recruitment of myeloid cells	0% (0/1)
2	6	1	8-bromo-cAMP	4	Ccl2,IL6,ODC1,RRM2	1	Growth of liver tumor	0% (0/1)
2	6	1	P2RX4	4	Ccl2,CXCL2,CXCL3,IL6	1	Cellular infiltration by leukocytes	0% (0/1)
2	6	1	P2RX4	4	Ccl2,CXCL2,CXCL3,IL6	1	Cellular infiltration by blood cells	0% (0/1)
2	6	1	P2RX4	4	Ccl2,CXCL2,CXCL3,IL6	1	Metastasis	0% (0/1)
2	6	1	P2RX4	4	Ccl2,CXCL2,CXCL3,IL6	1	Chemotaxis of leukocytes	0% (0/1)
2	6	1	P2RX4	4	Ccl2,CXCL2,CXCL3,IL6	1	Advanced malignant tumor	0% (0/1)
2	6	1	P2RX4	4	Ccl2,CXCL2,CXCL3,IL6	1	Cellular infiltration	0% (0/1)
2	6	1	P2RX4	4	Ccl2,CXCL2,CXCL3,IL6	1	Chemotaxis	100% (1/1)
2	6	1	P2RX4	4	Ccl2,CXCL2,CXCL3,IL6	1	Recruitment of phagocytes	0% (0/1)
2	6	1	P2RX4	4	Ccl2,CXCL2,CXCL3,IL6	1	Adhesion of immune cells	0% (0/1)
2	6	1	P2RX4	4	Ccl2,CXCL2,CXCL3,IL6	1	Interaction of leukocytes	0% (0/1)
2	6	1	P2RX4	4	Ccl2,CXCL2,CXCL3,IL6	1	Adhesion of blood cells	0% (0/1)
2	6	1	P2RX4	4	Ccl2,CXCL2,CXCL3,IL6	1	Homing of leukocytes	0% (0/1)
2	6	1	P2RX4	4	Ccl2,CXCL2,CXCL3,IL6	1	Recruitment of granulocytes	0% (0/1)
2	6	1	P2RX4	4	Ccl2,CXCL2,CXCL3,IL6	1	Migration of phagocytes	0% (0/1)
2	6	1	P2RX4	4	Ccl2,CXCL2,CXCL3,IL6	1	Accumulation of granulocytes	0% (0/1)
2	6	1	B4GALNT1	4	C3,C3AR1,C4A/C4B,C5AR1	1	Cell movement of phagocytes	0% (0/1)
2	6	1	B4GALNT1	4	C3,C3AR1,C4A/C4B,C5AR1	1	Inflammatory response	0% (0/1)
2	6	1	B4GALNT1	4	C1QA,C3,C3AR1,C5AR1	1	Angiogenesis	0% (0/1)
2	6	1	B4GALNT1	4	C3,C3AR1,C4A/C4B,C5AR1	1	Cell movement of myeloid cells	0% (0/1)
2	6	1	B4GALNT1	4	C3,C3AR1,C4A/C4B,C5AR1	1	Degranulation of cells	0% (0/1)
2	6	1	B4GALNT1	4	C1QA,C3,C3AR1,C5AR1	1	Immune response of cells	0% (0/1)
2	6	1	B4GALNT1	4	C3,C3AR1,C4A/C4B,C5AR1	1	Recruitment of leukocytes	0% (0/1)
2	6	1	fisetin	4	Ccl2,CCL3L3,CTSK,TNFRSF11A	1	Migration of cells	100% (1/1)
2	6	1	fisetin	4	BIRC5,Ccl2,CTSK,TNFRSF11A	1	Growth of lesion	100% (1/1)
2	11	1	emodin	9	ARG1,BIRC5,Ccl2,CD86,CXCL10,CXCL3,IL6,IRF4,IRF5	1	Leukopoiesis	0% (0/1)
2	6	1	C9	4	Ccl2,CCL3L3,CXCL2,CXCL3	1	Cell movement of neutrophils	0% (0/1)
2	6	1	C9	4	Ccl2,CCL3L3,CXCL2,CXCL3	1	Chemotaxis of granulocytes	0% (0/1)
2	6	1	C9	4	Ccl2,CCL3L3,CXCL2,CXCL3	1	Chemotaxis of phagocytes	0% (0/1)
2	6	1	C9	4	Ccl2,CCL3L3,CXCL2,CXCL3	1	Cellular infiltration by leukocytes	0% (0/1)
2	6	1	C9	4	Ccl2,CCL3L3,CXCL2,CXCL3	1	Chemotaxis of myeloid cells	0% (0/1)
2	6	1	C9	4	Ccl2,CCL3L3,CXCL2,CXCL3	1	Recruitment of phagocytes	0% (0/1)
2	6	1	C9	4	Ccl2,CCL3L3,CXCL2,CXCL3	1	Adhesion of immune cells	0% (0/1)
2	6	1	C9	4	Ccl2,CCL3L3,CXCL2,CXCL3	1	Interaction of leukocytes	0% (0/1)
2	6	1	C9	4	Ccl2,CCL3L3,CXCL2,CXCL3	1	Adhesion of blood cells	0% (0/1)
2	6	1	C9	4	Ccl2,CCL3L3,CXCL2,CXCL3	1	Homing of leukocytes	0% (0/1)
2	6	1	C9	4	Ccl2,CCL3L3,CXCL2,CXCL3	1	Accumulation of leukocytes	0% (0/1)
2	6	1	C9	4	Ccl2,CCL3L3,CXCL2,CXCL3	1	Recruitment of granulocytes	0% (0/1)
2	6	1	C9	4	Ccl2,CCL3L3,CXCL2,CXCL3	1	Migration of phagocytes	0% (0/1)
2	6	1	C9	4	Ccl2,CCL3L3,CXCL2,CXCL3	1	Migration of granulocytes	0% (0/1)
2	6	1	C9	4	Ccl2,CCL3L3,CXCL2,CXCL3	1	Transmigration of cells	0% (0/1)
2	6	1	PRKAA2	4	CYBB,IL6,NCF1,PPARGC1A	1	Synthesis of reactive oxygen species	100% (1/1)
2	6	1	CAY10585	4	ADORA2B,Ccl2,CCL2,IL6	1	Recruitment of granulocytes	0% (0/1)
2	6	1	CAY10585	4	ADORA2B,Ccl2,CCL2,IL6	1	Cell movement of blood cells	0% (0/1)
2	6	1	CAY10585	4	ADORA2B,Ccl2,CCL2,IL6	1	Metastasis	0% (0/1)
2	6	1	CAY10585	4	ADORA2B,Ccl2,CCL2,IL6	1	Advanced malignant tumor	0% (0/1)
2	6	1	CAY10585	4	ADORA2B,Ccl2,CCL2,IL6	1	Angiogenesis	0% (0/1)
2	6	1	CAY10585	4	ADORA2B,Ccl2,CCL2,IL6	1	Leukopoiesis	0% (0/1)
2	6	1	CAY10585	4	ADORA2B,Ccl2,CCL2,IL6	1	Recruitment of myeloid cells	0% (0/1)
2	6	1	belnacasan	4	Ccl2,CCL3L3,CXCL3,IL18	1	Cell movement of neutrophils	0% (0/1)
2	6	1	belnacasan	4	Ccl2,CCL3L3,CXCL3,IL18	1	Chemotaxis of granulocytes	0% (0/1)
2	6	1	belnacasan	4	Ccl2,CCL3L3,CXCL3,IL18	1	Activation of cells	0% (0/1)
2	6	1	belnacasan	4	Ccl2,CCL3L3,CXCL3,IL18	1	Chemotaxis of phagocytes	0% (0/1)
2	6	1	belnacasan	4	Ccl2,CCL3L3,CXCL3,IL18	1	Cellular infiltration by leukocytes	0% (0/1)
2	6	1	belnacasan	4	Ccl2,CCL3L3,CXCL3,IL18	1	Chemotaxis of myeloid cells	0% (0/1)
2	6	1	belnacasan	4	Ccl2,CCL3L3,CXCL3,IL18	1	Lymphocyte migration	0% (0/1)
2	6	1	belnacasan	4	Ccl2,CCL3L3,CXCL3,IL18	1	Recruitment of phagocytes	0% (0/1)
2	6	1	belnacasan	4	Ccl2,CCL3L3,CXCL3,IL18	1	Cell movement of macrophages	0% (0/1)
2	6	1	belnacasan	4	Ccl2,CCL3L3,CXCL3,IL18	1	Adhesion of immune cells	0% (0/1)
2	6	1	belnacasan	4	Ccl2,CCL3L3,CXCL3,IL18	1	Migration of lymphatic system cells	0% (0/1)
2	6	1	belnacasan	4	Ccl2,CCL3L3,CXCL3,IL18	1	Interaction of leukocytes	0% (0/1)
2	6	1	belnacasan	4	Ccl2,CCL3L3,CXCL3,IL18	1	Adhesion of blood cells	0% (0/1)
2	6	1	belnacasan	4	Ccl2,CCL3L3,CXCL3,IL18	1	Homing of leukocytes	0% (0/1)
2	6	1	belnacasan	4	Ccl2,CCL3L3,CXCL3,IL18	1	Accumulation of leukocytes	0% (0/1)
2	6	1	belnacasan	4	Ccl2,CCL3L3,CXCL3,IL18	1	Migration of mononuclear leukocytes	0% (0/1)
2	6	1	belnacasan	4	Ccl2,CCL3L3,CXCL3,IL18	1	Recruitment of granulocytes	0% (0/1)
2	6	1	belnacasan	4	Ccl2,CCL3L3,CXCL3,IL18	1	Migration of phagocytes	0% (0/1)
2	6	1	belnacasan	4	Ccl2,CCL3L3,CXCL3,IL18	1	Migration of antigen presenting cells	0% (0/1)
2	6	1	belnacasan	4	Ccl2,CCL3L3,CXCL3,IL18	1	Migration of granulocytes	0% (0/1)
2	6	1	F2RL1	4	CCL2,CXCL2,F3,IL6	1	Accumulation of granulocytes	0% (0/1)
2	6	1	MXD1	4	BUB1,CCNA2,CDK1,CIITA	1	Proliferation of connective tissue cells	0% (0/1)
2	6	1	PTH	4	AREG,IL6,ODC1,PLAU	1	Liver Regeneration	0% (0/1)
2	6	1	calcimycin	4	IL6,INHBA,LCN2,SERPINE1	1	Chemotaxis of leukocytes	0% (0/1)
2	6	1	PF543	4	CCR5,IL6,ITGAX,TLR1	1	Infection of mammalia	0% (0/1)
2	6	1	CEBPB	4	Ccl2,IL6,ODC1,RRM2	1	Growth of liver tumor	0% (0/1)
2	6	1	METTL3	4	CCL2,CXCL10,IL6,PPARGC1A	1	Inflammatory response	0% (0/1)
2	6	1	Srgn	4	S100A9,THBS1,TPSAB1/TPSB2,TREM1	1	Chemotaxis of phagocytes	0% (0/1)
2	6	1	Srgn	4	LYZ,Mcpt4,THBS1,TPSAB1/TPSB2	1	Recruitment of granulocytes	0% (0/1)
2	6	1	Srgn	4	S100A9,THBS1,TPSAB1/TPSB2,TREM1	1	Homing of leukocytes	0% (0/1)
2	6	1	Srgn	4	LYZ,Mcpt4,THBS1,TPSAB1/TPSB2	1	Recruitment of myeloid cells	0% (0/1)
2	6	1	Srgn	4	S100A9,THBS1,TPSAB1/TPSB2,TREM1	1	Chemotaxis of myeloid cells	0% (0/1)
2	6	1	PI3K (family)	4	CCL2,CXCL10,CXCL11,ESR1	1	Mobilization of Ca2+	0% (0/1)
2	6	1	PI3K (family)	4	CCL2,CXCL11,HMOX1,IL6	1	Response of mononuclear leukocytes	0% (0/1)
2	6	1	FCGR2B	4	CD80,CD86,CLEC4E,CXCL10	1	Accumulation of cells	100% (1/1)
2	6	1	OSCAR	4	CD83,CD86,MMP19,TNFSF10	1	Quantity of lymphatic system cells	0% (0/1)
2	6	1	OSCAR	4	CD83,IL1RN,MMP7,TNFSF10	1	Quantity of connective tissue	100% (1/1)
2	6	1	iguratimod	4	Ccl2,CXCL2,CXCL3,IL6	1	Cellular infiltration by leukocytes	0% (0/1)
2	6	1	iguratimod	4	Ccl2,CXCL2,CXCL3,IL6	1	Cellular infiltration by blood cells	0% (0/1)
2	6	1	iguratimod	4	Ccl2,CXCL2,CXCL3,IL6	1	Metastasis	0% (0/1)
2	6	1	iguratimod	4	Ccl2,CXCL2,CXCL3,IL6	1	Chemotaxis of leukocytes	0% (0/1)
2	6	1	iguratimod	4	Ccl2,CXCL2,CXCL3,IL6	1	Advanced malignant tumor	0% (0/1)
2	6	1	iguratimod	4	Ccl2,CXCL2,CXCL3,IL6	1	Cellular infiltration	0% (0/1)
2	6	1	iguratimod	4	Ccl2,CXCL2,CXCL3,IL6	1	Chemotaxis	0% (0/1)
2	6	1	iguratimod	4	Ccl2,CXCL2,CXCL3,IL6	1	Recruitment of phagocytes	0% (0/1)
2	6	1	iguratimod	4	Ccl2,CXCL2,CXCL3,IL6	1	Adhesion of immune cells	0% (0/1)
2	6	1	iguratimod	4	Ccl2,CXCL2,CXCL3,IL6	1	Interaction of leukocytes	0% (0/1)
2	6	1	iguratimod	4	Ccl2,CXCL2,CXCL3,IL6	1	Adhesion of blood cells	0% (0/1)
2	6	1	iguratimod	4	Ccl2,CXCL2,CXCL3,IL6	1	Homing of leukocytes	0% (0/1)
2	6	1	iguratimod	4	Ccl2,CXCL2,CXCL3,IL6	1	Recruitment of granulocytes	0% (0/1)
2	6	1	iguratimod	4	Ccl2,CXCL2,CXCL3,IL6	1	Migration of phagocytes	0% (0/1)
2	6	1	iguratimod	4	Ccl2,CXCL2,CXCL3,IL6	1	Accumulation of granulocytes	0% (0/1)
2	6	1	5A apoA-I mimetic peptide	4	ARG1,CCL17,Ccl7,Retnla	1	Cell movement	0% (0/1)
2	6	1	5A apoA-I mimetic peptide	4	ARG1,CCL17,Ccl7,Retnla	1	Inflammatory response	0% (0/1)
2	6	1	adapalene	4	Ccl2,CCL2,CCL4,CXCL2	1	Cell movement of neutrophils	0% (0/1)
2	6	1	adapalene	4	Ccl2,CCL2,CCL4,CXCL2	1	Migration of granulocytes	0% (0/1)
2	6	1	adapalene	4	Ccl2,CCL2,CCL4,CXCL2	1	Chemotaxis of phagocytes	0% (0/1)
2	6	1	adapalene	4	Ccl2,CCL2,CCL4,CXCL2	1	Cellular infiltration by phagocytes	0% (0/1)
2	6	1	adapalene	4	Ccl2,CCL2,CCL4,CXCL2	1	Chemotaxis of myeloid cells	0% (0/1)
2	6	1	adapalene	4	Ccl2,CCL2,CCL4,CXCL2	1	Recruitment of phagocytes	0% (0/1)
2	6	1	adapalene	4	Ccl2,CCL2,CCL4,CXCL2	1	Adhesion of immune cells	0% (0/1)
2	6	1	adapalene	4	Ccl2,CCL2,CCL4,CXCL2	1	Interaction of leukocytes	0% (0/1)
2	6	1	adapalene	4	Ccl2,CCL2,CCL4,CXCL2	1	Adhesion of blood cells	0% (0/1)
2	6	1	adapalene	4	Ccl2,CCL2,CCL4,CXCL2	1	Homing of leukocytes	0% (0/1)
2	6	1	adapalene	4	Ccl2,CCL2,CCL4,CXCL2	1	Binding of tumor cell lines	0% (0/1)
2	6	1	adapalene	4	Ccl2,CCL2,CCL4,CXCL2	1	Recruitment of myeloid cells	0% (0/1)
2	6	1	adapalene	4	Ccl2,CCL2,CCL4,CXCL2	1	Cellular infiltration by myeloid cells	0% (0/1)
2	6	1	adapalene	4	Ccl2,CCL2,CCL4,CXCL2	1	Migration of phagocytes	0% (0/1)
2	6	1	adapalene	4	Ccl2,CCL2,CCL4,CXCL2	1	Migration of myeloid cells	0% (0/1)
2	6	1	adapalene	4	Ccl2,CCL2,CCL4,CXCL2	1	Transmigration of cells	0% (0/1)
2	6	1	NDUFA13	4	A2M,CCNB1,CDK1,MYBL2	1	Cell viability	100% (1/1)
2	6	1	ponesimod	4	CCL2,IL6,S1PR3,SERPINE1	1	Cellular homeostasis	0% (0/1)
2	6	1	ponesimod	4	CCL2,IL6,SERPINE1,THBS1	1	Recruitment of phagocytes	0% (0/1)
2	6	1	ponesimod	4	CCL2,IL6,SERPINE1,THBS1	1	Binding of tumor cell lines	0% (0/1)
2	6	1	ponesimod	4	CCL2,IL6,SERPINE1,THBS1	1	Recruitment of granulocytes	0% (0/1)
2	6	1	ELOVL3	4	C3AR1,CTSS,GPNMB,SPP1	1	Growth of solid tumor	0% (0/1)
2	6	1	SLC15A4	4	BCL2A1,CCL2,IL6,MAFB	1	Leukopoiesis	0% (0/1)
2	6	1	Org 48762-0	4	Ccl2,CCL3L3,CCL4,IL6	1	Cellular infiltration by mononuclear leukocytes	0% (0/1)
2	6	1	Org 48762-0	4	Ccl2,CCL3L3,CCL4,IL6	1	Cellular infiltration by blood cells	0% (0/1)
2	6	1	Org 48762-0	4	Ccl2,CCL3L3,CCL4,IL6	1	Activation of cells	0% (0/1)
2	6	1	Org 48762-0	4	Ccl2,CCL3L3,CCL4,IL6	1	Chemotaxis of leukocytes	0% (0/1)
2	6	1	Org 48762-0	4	Ccl2,CCL3L3,CCL4,IL6	1	Cellular infiltration	0% (0/1)
2	6	1	Org 48762-0	4	Ccl2,CCL3L3,CCL4,IL6	1	Chemotaxis	0% (0/1)
2	6	1	Org 48762-0	4	Ccl2,CCL3L3,CCL4,IL6	1	Cell movement of T lymphocytes	0% (0/1)
2	6	1	Org 48762-0	4	Ccl2,CCL3L3,CCL4,IL6	1	Hypersensitive reaction	0% (0/1)
2	6	1	Org 48762-0	4	Ccl2,CCL3L3,CCL4,IL6	1	Recruitment of phagocytes	0% (0/1)
2	6	1	Org 48762-0	4	Ccl2,CCL3L3,CCL4,IL6	1	Adhesion of immune cells	0% (0/1)
2	6	1	Org 48762-0	4	Ccl2,CCL3L3,CCL4,IL6	1	Migration of lymphatic system cells	0% (0/1)
2	6	1	Org 48762-0	4	Ccl2,CCL3L3,CCL4,IL6	1	Interaction of leukocytes	0% (0/1)
2	6	1	Org 48762-0	4	Ccl2,CCL3L3,CCL4,IL6	1	Adhesion of blood cells	0% (0/1)
2	6	1	Org 48762-0	4	Ccl2,CCL3L3,CCL4,IL6	1	Homing of leukocytes	0% (0/1)
2	6	1	Org 48762-0	4	Ccl2,CCL3L3,CCL4,IL6	1	Migration of mononuclear leukocytes	0% (0/1)
2	6	1	Org 48762-0	4	Ccl2,CCL3L3,CCL4,IL6	1	Recruitment of myeloid cells	0% (0/1)
2	6	1	Org 48762-0	4	Ccl2,CCL3L3,CCL4,IL6	1	Migration of phagocytes	0% (0/1)
2	6	1	RC3H1	4	CCL2,CD44,ICOS,STING1	1	Immune response of cells	0% (0/1)
2	6	1	LY294002	4	CCL2,CD44,IGF1,SPP1	1	Migration of hepatic stellate cells	0% (0/1)
2	6	1	DCN	4	CXCL10,IL6,SERPINE1,THBS1	1	Cell movement of mononuclear leukocytes	0% (0/1)
2	6	1	DCN	4	CXCL10,IL6,SERPINE1,THBS1	1	Recruitment of phagocytes	0% (0/1)
2	6	1	DCN	4	CXCL10,IL6,SERPINE1,THBS1	1	Recruitment of granulocytes	0% (0/1)
2	6	1	TSLP	4	CD80,CD83,CD86,IL6	1	Quantity of lymphatic system cells	100% (1/1)
2	6	1	TSLP	4	CD80,CD83,CD86,IL6	1	T cell development	100% (1/1)
2	6	1	TSLP	4	CD80,CD83,CD86,IL6	1	T cell homeostasis	100% (1/1)
2	6	1	TSLP	4	CD80,CD83,CD86,IL6	1	Activation of T lymphocytes	100% (1/1)
2	6	1	TSLP	4	CD80,CD83,CD86,IL6	1	Activation of lymphoid cells	100% (1/1)
2	6	1	PARP2	4	CCL1,CCL4,CD80,CD86	1	Activation of myeloid cells	0% (0/1)
2	6	1	TASL	4	BCL2A1,CCL2,IL6,MAFB	1	Leukopoiesis	0% (0/1)
2	6	1	TYROBP	4	CD86,FCGR2B,IL6,NCKAP1L	1	Immune response of antigen presenting cells	100% (1/1)
2	11	1	Creb	9	AREG,CCN4,CTSB,DUSP4,IGF1,IL6,SLC7A11,TAC1,TRAIP	1	Cell proliferation of fibroblasts	0% (0/1)
2	6	1	Stat3-Stat3	4	A2M,FTL,SERPINA3,SOD2	1	Cell survival	0% (0/1)
2	6	1	SIM1	4	CD86,FCGR2A,Tnfsf9,TYROBP	1	Experimental autoimmune encephalomyelitis	0% (0/1)
2	6	1	Cdk	4	CCL2,CXCL10,CXCL2,IL6	1	Cellular infiltration by leukocytes	0% (0/1)
2	6	1	Cdk	4	CCL2,CXCL10,GADD45G,IL6	1	Leukopoiesis	0% (0/1)
2	6	1	Cdk	4	CCL2,CXCL10,CXCL2,IL6	1	Cellular infiltration by blood cells	0% (0/1)
2	6	1	Cdk	4	CCL2,CXCL10,CXCL2,IL6	1	Chemotaxis of leukocytes	0% (0/1)
2	6	1	Cdk	4	CCL2,CXCL10,CXCL2,IL6	1	Recruitment of phagocytes	0% (0/1)
2	6	1	Cdk	4	CCL2,CXCL10,CXCL2,IL6	1	Binding of leukocytes	0% (0/1)
2	6	1	Cdk	4	CCL2,CXCL10,CXCL2,IL6	1	Interaction of leukocytes	0% (0/1)
2	6	1	Cdk	4	CCL2,CXCL10,CXCL2,IL6	1	Adhesion of blood cells	0% (0/1)
2	6	1	Cdk	4	CCL2,CXCL10,CXCL2,IL6	1	Homing of leukocytes	0% (0/1)
2	6	1	Cdk	4	CCL2,CXCL10,CXCL2,IL6	1	Recruitment of granulocytes	0% (0/1)
2	6	1	Cdk	4	CCL2,CXCL10,CXCL2,IL6	1	Migration of phagocytes	0% (0/1)
2	6	1	AGT	4	C3,C5AR1,CD44,THBS1	1	Reperfusion injury of kidney	0% (0/1)
2	6	1	cephaloridine	4	CCL17,CXCL10,HMOX1,MMP12	1	Migration of phagocytes	0% (0/1)
2	6	1	cephaloridine	4	CCL17,CXCL10,HMOX1,MMP12	1	Migration of antigen presenting cells	0% (0/1)
2	6	1	miR-291a-3p (and other miRNAs w/seed AAGUGCU)	4	C3,CD44,CD83,IL6	1	Activation of T lymphocytes	0% (0/1)
2	6	1	miR-291a-3p (and other miRNAs w/seed AAGUGCU)	4	C3,CD44,CD83,IL6	1	Hypersensitive reaction	0% (0/1)
2	6	1	miR-291a-3p (and other miRNAs w/seed AAGUGCU)	4	C3,CD44,CD83,IL6	1	Activation of lymphoid cells	0% (0/1)
2	6	1	PRKCB	4	CD80,CD83,CD86,IL6	1	Activation of T lymphocytes	100% (1/1)
2	6	1	PRKCB	4	CD80,CD83,CD86,IL6	1	T cell development	0% (0/1)
2	6	1	PRKCB	4	CD80,CD83,CD86,IL6	1	T cell homeostasis	0% (0/1)
2	6	1	PRKCB	4	CD80,CD83,CD86,IL6	1	Activation of lymphoid cells	100% (1/1)
2	6	1	2-[[9-isopropyl-6-[[4-(2-pyridyl)phenyl]methylamino]purin-2-yl]amino]butan-1-ol	4	Ccl2,CCL3L3,CD86,IL6	1	Activation of cells	100% (1/1)
2	6	1	2-[[9-isopropyl-6-[[4-(2-pyridyl)phenyl]methylamino]purin-2-yl]amino]butan-1-ol	4	Ccl2,CCL3L3,CD86,IL6	1	Adhesion of immune cells	0% (0/1)
2	6	1	2-[[9-isopropyl-6-[[4-(2-pyridyl)phenyl]methylamino]purin-2-yl]amino]butan-1-ol	4	Ccl2,CCL3L3,CD86,IL6	1	Interaction of leukocytes	0% (0/1)
2	6	1	2-[[9-isopropyl-6-[[4-(2-pyridyl)phenyl]methylamino]purin-2-yl]amino]butan-1-ol	4	Ccl2,CCL3L3,CD86,IL6	1	Adhesion of blood cells	0% (0/1)
2	6	1	cytarabine	4	CD80,CD86,IL6,TLR1	1	Activation of lymphocytes	0% (0/1)
2	6	1	cytarabine	4	CD80,CD86,IL6,TLR1	1	Activation of lymphoid cells	0% (0/1)
2	6	1	cytarabine	4	CCL3L3,CD80,CD86,IL6	1	Adhesion of immune cells	0% (0/1)
2	6	1	cytarabine	4	CD80,CD86,IL6,TLR1	1	Stimulation of cells	0% (0/1)
2	6	1	C-21	4	Ccl2,IL6,NCF1,SPP1	1	Cellular infiltration by leukocytes	0% (0/1)
2	6	1	C-21	4	Ccl2,IL6,NCF1,SPP1	1	Cellular infiltration by blood cells	0% (0/1)
2	6	1	C-21	4	Ccl2,IL6,NCF1,SPP1	1	Angiogenesis	0% (0/1)
2	6	1	C-21	4	Ccl2,IL6,NCF1,SPP1	1	Cellular infiltration	0% (0/1)
2	6	1	CSF2	4	IL6,OSM,RRM2,TPX2	1	Growth of hepatocellular carcinoma	0% (0/1)
2	6	1	E. coli B4 lipopolysaccharide	4	CENPA,IL6,Ly6a (includes others),TNFSF10	1	Growth of hepatocellular carcinoma	0% (0/1)
2	6	1	TNIP1	4	CD4,CXCL2,CXCL3,S100A9	1	Interaction of phagocytes	0% (0/1)
2	6	1	TNIP1	4	CD4,CXCL2,CXCL3,S100A9	1	Binding of professional phagocytic cells	0% (0/1)
2	6	1	E. coli lipopolysaccharide	4	CCL4,CXCL3,S100A9,TREM1	1	Degranulation of neutrophils	100% (1/1)
2	6	1	Notch	4	CAPG,FCGR2A,FCGR2B,IL6	1	Response of macrophages	0% (0/1)
2	6	1	ECSIT	4	CD44,HMOX1,IL6,PLAUR	1	Response of macrophages	0% (0/1)
2	6	1	C3	4	C5AR1,CXCL10,CXCL3,LCN2	1	Response of neutrophils	100% (1/1)
2	6	1	uric acid	4	CXCL2,CXCL3,HMOX1,IL6	1	Transport of metal	100% (1/1)
2	6	1	C5AR1	4	CXCL2,CXCL3,IGF1,IL6	1	Transport of metal	0% (0/1)
2	6	1	ADA	4	ADORA1,CXCL2,CXCL3,IL6	1	Transport of metal	0% (0/1)
2	6	1	MALT1	4	CXCL2,CXCL3,IL6,LCN2	1	Transport of metal	0% (0/1)
2	6	1	ARRB2	4	ADRA2A,CXCL2,CXCL3,IL6	1	Transport of metal	0% (0/1)
2	6	1	Notch	4	CAPG,FCGR2A,FCGR2B,IL6	1	Immune response of macrophages	0% (0/1)
2	6	1	ECSIT	4	CD44,HMOX1,IL6,PLAUR	1	Immune response of macrophages	0% (0/1)
2	6	1	C3	4	C5AR1,CXCL10,CXCL3,LCN2	1	Response of granulocytes	100% (1/1)
2	6	1	E. coli lipopolysaccharide	4	CCL4,CXCL3,S100A9,TREM1	1	Degranulation of granulocytes	100% (1/1)
1.941	15	1	PRDM1	13	BCL2A1,Bhlhe41,BTK,CD74,CD86,CIITA,HLA-DQA1,HLA-DRA,IL6,IRF4,MAFB,PDCD1,TBX21	1	Differentiation of T lymphocytes	100% (1/1)
1.94	19	1	NFKB1	17	ADORA1,APOE,CCL17,Ccl2,CCL2,CCL22,CCL3L3,CCL4,CSF2RA,CXCL10,CXCL2,CXCL3,CYBB,IL18,MMP7,PLAU,SPI1	1	Chemotaxis of myeloid cells	0% (0/1)
1.94	19	1	HRAS	17	Ccl2,CD44,CTSS,CTSZ,CXCL10,CXCL11,CXCL2,CXCL3,HMOX1,IL6,MMP12,MMP14,PLAU,PLAUR,SERPINE1,SPP1,VCAN	1	Migration of phagocytes	0% (0/1)
1.897	12	1	TAF4	10	AREG,EHF,IL1RN,PBK,PENK,PPARGC1A,PTN,SPP1,THBS1,THBS2	1	Migration of cells	0% (0/1)
1.897	12	1	KLF2	10	CAV1,CCL2,F3,IGF2,IL6,MMP14,SERPINE1,TGFBR1,THBS1,TNFSF10	1	Proliferation of muscle cells	0% (0/1)
1.897	12	1	ANGPT2	10	Ccl2,CCL3L3,CD68,CD86,IL18,IL6,ITGAX,NCF1,PTGES,SERPINE1	1	Inflammation of central nervous system	0% (0/1)
1.89	9	1	E2F3	7	BIRC5,CDK1,IGF1,INHBA,MYBL2,RBL1,SERPINE1	1	Quantity of connective tissue	100% (1/1)
1.89	9	1	Lh	7	AREG,EREG,GEM,IL6,SLC7A11,SOD2,TNFRSF12A	1	Proliferation of connective tissue cells	0% (0/1)
1.89	9	1	ITGB2	7	BCL2A1,Ccl2,CD44,CXCL10,CXCL2,CXCL3,IL6	1	Accumulation of granulocytes	100% (1/1)
1.89	9	1	CSF3	7	CXCL2,CXCL3,HMOX1,IGF1,IL6,LCN2,PLCB2	1	Transport of metal	0% (0/1)
1.89	9	1	LIPE	7	IL6,MAPT,MRC1,MSR1,NPY,PPARGC1A,UCP3	1	Synthesis of reactive oxygen species	0% (0/1)
1.89	9	1	CALCA	7	CCL2,CCL22,CCL4,CD44,CSF2RB,IL6,SERPINE1	1	Recruitment of granulocytes	0% (0/1)
1.89	9	1	Pro-inflammatory Cytokine	7	APOE,F3,HMOX1,HP,IL6,LCN2,UBD	1	Organismal death	0% (0/1)
1.89	9	1	Pro-inflammatory Cytokine	7	APOE,F3,HMOX1,HP,IL6,LCN2,OLR1	1	Angiogenesis	0% (0/1)
1.89	9	1	IL2	7	AREG,C3,CCNE1,IL1RN,IL6,ODC1,OSM	1	Liver Regeneration	0% (0/1)
1.89	9	1	IL1B	7	C3,CNR2,IL1RN,IL6,ODC1,OSM,PLAU	1	Liver Regeneration	0% (0/1)
1.871	16	1	tyrphostin AG490	14	BIRC5,CCL2,CFTR,CXCL2,ESR1,FOXP3,IGF1,IGF2,IL6,PDCD1,PTTG1,PTX3,SOD2,SPP1	1	Intrathoracic organ tumor	0% (0/1)
1.871	16	1	tyrphostin AG490	14	BIRC5,CCL2,CFTR,CXCL2,ESR1,FOXP3,IGF1,IGF2,IL6,PDCD1,PTTG1,PTX3,SOD2,SPP1	1	Lung tumor	0% (0/1)
1.871	16	1	tyrphostin AG490	14	BIRC5,CCL2,CFTR,CXCL2,ESR1,FOXP3,IGF1,IGF2,IL6,PDCD1,PTTG1,PTX3,SOD2,SPP1	1	Thoracic neoplasm	0% (0/1)
1.809	13	1	FAS	11	BCL2A1,BTK,CD80,CD83,CD86,FCGR2B,GADD45G,IL18,IL6,ITGB8,LILRB4	1	Differentiation of T lymphocytes	0% (0/1)
1.807	17	1	tyrphostin AG490	15	BIRC5,CCL2,CFTR,CXCL2,ESR1,FOXP3,ICOS,IGF1,IGF2,IL6,PDCD1,PTTG1,PTX3,SOD2,SPP1	1	Respiratory system tumor	0% (0/1)
1.789	7	1	IFNE	5	CD80,CD83,CD86,CXCL10,SLC2A1	1	Quantity of lymphatic system cells	100% (1/1)
1.789	7	1	MYC	5	IL6,Ly6a (includes others),ODC1,RRM2,TNFSF10	1	Growth of liver tumor	100% (1/1)
1.789	7	1	CXCL8	5	CD44,CXCL2,CXCL3,F3,ITGB2	1	Accumulation of granulocytes	100% (1/1)
1.789	7	1	CARM1	5	C3,Ccl2,CXCL10,CXCL3,PTGES	1	Cellular infiltration by phagocytes	0% (0/1)
1.789	7	1	CARM1	5	C3,Ccl2,CXCL10,CXCL3,PTGES	1	Activation of phagocytes	0% (0/1)
1.789	7	1	CARM1	5	C3,Ccl2,CXCL10,CXCL3,PTGES	1	Inflammatory response	0% (0/1)
1.789	7	1	CARM1	5	C3,Ccl2,CXCL10,CXCL3,PTGES	1	Cellular infiltration by myeloid cells	0% (0/1)
1.789	7	1	CARM1	5	C3,Ccl2,CXCL10,CXCL3,PTGES	1	Cellular infiltration by leukocytes	0% (0/1)
1.789	7	1	CARM1	5	C3,Ccl2,CXCL10,CXCL3,PTGES	1	Cell movement of lymphocytes	0% (0/1)
1.789	7	1	CARM1	5	C3,Ccl2,CXCL10,CXCL3,PTGES	1	Cell movement of macrophages	0% (0/1)
1.789	7	1	CARM1	5	C3,Ccl2,CXCL10,CXCL3,PTGES	1	Cell movement of lymphatic system cells	0% (0/1)
1.789	7	1	CARM1	5	C3,Ccl2,CXCL10,CXCL3,PTGES	1	Activation of myeloid cells	0% (0/1)
1.789	7	1	CCR2	5	C1QA,Ccl2,CXCL10,IL6,THBS1	1	Phagocytosis	100% (1/1)
1.789	7	1	nystatin	5	CCL3L3,CD80,CD86,IL6,SPP1	1	Adhesion of immune cells	0% (0/1)
1.789	7	1	nystatin	5	CCL3L3,CD80,CD86,IL6,SPP1	1	Interaction of leukocytes	0% (0/1)
1.789	7	1	nystatin	5	CCL3L3,CD80,CD86,IL6,SPP1	1	Adhesion of blood cells	0% (0/1)
1.789	7	1	TFDP1	5	CCNE1,CDK1,MYBL2,PTTG1,RBL1	1	Organismal death	100% (1/1)
1.789	7	1	ZC3H12C	5	CCR5,CLEC4E,GPR34,PLA2G7,SLAMF8	1	Infection of mammalia	0% (0/1)
1.789	7	1	imipramine blue	5	AURKA,CCNA2,CCNB1,CCNF,SOD2	1	Growth of connective tissue	0% (0/1)
1.789	7	1	EHF	5	HMOX1,IL6,PLAUR,S100A9,SERPINE1	1	Migration of myeloid cells	0% (0/1)
1.789	7	1	TSH	5	CTSS,IGFBP3,IL6,SLC2A1,SOD2	1	Quantity of lymphatic system cells	0% (0/1)
1.789	7	1	TSH	5	CTSS,IL6,KDR,SLC2A1,SOD2	1	Invasion of cells	0% (0/1)
1.789	7	1	forskolin	5	AREG,BIRC5,IL6,ODC1,PLAU	1	Liver Regeneration	0% (0/1)
1.789	7	1	IL7	5	CCL2,CCL4,CXCL3,IL6,TNFRSF9	1	Activation of granulocytes	0% (0/1)
1.789	7	1	LIF	5	CCL3L3,CXCL10,IGF1,IL6,TAC1	1	Lung injury	0% (0/1)
1.789	7	1	LIF	5	Ccl2,CCL3L3,CXCL10,KDR,SPP1	1	Recruitment of antigen presenting cells	0% (0/1)
1.789	7	1	FOXL2	5	BCL2A1,CCL3L3,CXCL2,CXCL3,IL6	1	Accumulation of leukocytes	0% (0/1)
1.789	7	1	FOXL2	5	CCL3L3,CXCL2,CXCL3,CXCL6,INHBA	1	Chemotaxis of phagocytes	0% (0/1)
1.789	7	1	FOXL2	5	CCL3L3,CXCL2,CXCL3,CXCL6,INHBA	1	Chemotaxis of myeloid cells	0% (0/1)
1.789	7	1	FOXL2	5	CCL3L3,CXCL2,CXCL3,IGF1,IL6	1	Transmigration of cells	0% (0/1)
1.789	7	1	RAD21	5	FOXP3,HLA-DQA1,HLA-DQB1,HLA-DRA,IGF2	1	T cell development	0% (0/1)
1.789	7	1	RAD21	5	FOXP3,HLA-DQA1,HLA-DQB1,HLA-DRA,IGF2	1	T cell homeostasis	0% (0/1)
1.789	7	1	1-methyl-4-phenyl-1,2,3,6-tetrahydropyridine	5	AIF1,Ccl2,IL18,IL6,OSM	1	Lymphocyte migration	100% (1/1)
1.789	7	1	1-methyl-4-phenyl-1,2,3,6-tetrahydropyridine	5	AIF1,Ccl2,IL18,IL6,OSM	1	Migration of lymphatic system cells	100% (1/1)
1.789	7	1	EBI3	5	CD80,CD86,HAVCR2,PIM1,TNFSF10	1	Accumulation of blood cells	0% (0/1)
1.789	7	1	STAT3	5	CCL2,CCL4,CCR5,CD44,SPP1	1	Migration of hepatic stellate cells	0% (0/1)
1.789	7	1	PRKCE	5	BIRC5,CAV1,FCGR1A,IL6,PIM1	1	Cell viability	100% (1/1)
1.789	7	1	CSF	5	C3,CCL4,IL1RN,SERPINE1,TNFRSF9	1	Cell movement of macrophages	0% (0/1)
1.789	7	1	ACVRL1	5	EFNB2,KDR,PLAU,PLAUR,SERPINE1	1	Migration of cells	100% (1/1)
1.789	7	1	IKZF2	5	BATF,FOXP3,ICOS,IRF4,TNFRSF9	1	T cell development	100% (1/1)
1.789	7	1	IKZF2	5	BATF,FOXP3,ICOS,IRF4,TNFRSF9	1	Lymphopoiesis	100% (1/1)
1.789	7	1	IKZF2	5	BATF,FOXP3,ICOS,Ly6a (includes others),TNFRSF9	1	Cell movement of T lymphocytes	0% (0/1)
1.789	7	1	PSMB11	5	CXCL3,KIT,LGALS3,PLCB2,VAV1	1	Binding of myeloid cells	0% (0/1)
1.768	10	1	ethanol	8	CCL2,CXCL3,ESR1,HMOX1,IL6,SERPINE1,SLC7A11,SOD2	1	Cell proliferation of fibroblasts	0% (0/1)
1.768	10	1	C5	8	C5AR1,Ccl2,CCL3L3,CCL4,CXCL2,CXCL3,IL6,ITGB2	1	Chemotaxis	100% (1/1)
1.768	10	1	FGF2	8	Ccl2,CCL2,CXCL10,CXCL2,F3,IL6,SPP1,TNFSF10	1	Accumulation of granulocytes	0% (0/1)
1.768	10	1	IKBKB	8	C3,CD44,CXCL10,CXCL3,F3,LCN2,PLAU,PTX3	1	Immune response of neutrophils	0% (0/1)
1.768	10	1	SPI1	8	C3AR1,CCL22,CCL4,CIITA,CXCL10,IL1RN,ITGB2,SPP1	1	Recruitment of antigen presenting cells	0% (0/1)
1.732	5	1	WWTR1-CAMTA1	3	CXCL2,Ly6a (includes others),SERPINE1	1	Cell movement of leukocytes	0% (0/1)
1.732	5	1	RPTOR	3	FCGR1A,ICOS,SPI1	1	Phagocytosis of antigen presenting cells	100% (1/1)
1.732	5	1	TGFBR1	3	C3,CFB,IL6	1	Increased Levels of Creatinine	0% (0/1)
1.732	5	1	TGFBR1	3	C3,C3AR1,CFB	1	Reperfusion injury of kidney	0% (0/1)
1.732	5	1	TFEB	3	CCL17,CD63,IL6	1	Activation of granulocytes	0% (0/1)
1.732	5	1	CDK9	3	CCNB1,IL6,MYBL2	1	Cell proliferation of fibroblasts	0% (0/1)
1.732	5	1	CDK9	3	CXCL2,IL6,PPARGC1A	1	Synthesis of reactive oxygen species	0% (0/1)
1.732	5	1	enterolactone	3	ESR1,MKI67,SPP1	1	Proliferation of connective tissue cells	0% (0/1)
1.732	5	1	lapatinib	3	AREG,BIRC5,ESR1	1	Growth of tumor	100% (1/1)
1.732	5	1	lapatinib	3	AREG,EREG,ESR1	1	Cell proliferation of fibroblasts	0% (0/1)
1.732	5	1	urethane	3	ARG1,HMOX1,PTGES	1	Activation of macrophages	0% (0/1)
1.732	5	1	CDKN1B	3	BLNK,BTK,LGALS3	1	Mobilization of Ca2+	0% (0/1)
1.732	5	1	FGF7	3	CD44,PTAFR,SFTPA1	1	Mobilization of Ca2+	0% (0/1)
1.732	5	1	cobalt chloride	3	BHLHE40,HMOX1,PLAUR	1	Response of mononuclear leukocytes	0% (0/1)
1.732	5	1	DKC1	3	Ccl2,IL6,SERPINE1	1	Chemotaxis of leukocytes	0% (0/1)
1.732	5	1	DKC1	3	Ccl2,IL6,SERPINE1	1	Recruitment of phagocytes	0% (0/1)
1.732	5	1	DKC1	3	Ccl2,IL6,SERPINE1	1	Infection of mammalia	0% (0/1)
1.732	5	1	DKC1	3	Ccl2,IL6,SERPINE1	1	Homing of leukocytes	0% (0/1)
1.732	5	1	DKC1	3	Ccl2,IL6,SERPINE1	1	Recruitment of granulocytes	0% (0/1)
1.732	5	1	NONO	3	CXCL10,SIGLEC1,SLAMF7	1	Phagocytosis of myeloid cells	0% (0/1)
1.732	5	1	NONO	3	CXCL10,SIGLEC1,SLAMF7	1	Phagocytosis of phagocytes	0% (0/1)
1.732	5	1	NONO	3	CXCL10,SIGLEC1,SLAMF7	1	Phagocytosis of leukocytes	0% (0/1)
1.732	5	1	NONO	3	CXCL10,SIGLEC1,SLAMF7	1	Engulfment of myeloid cells	0% (0/1)
1.732	5	1	dihydrotestosterone	3	IGF1,NCF1,SPP1	1	Migration of hepatic stellate cells	0% (0/1)
1.732	5	1	HRH3	3	CXCL10,CXCL3,S100A9	1	Accumulation of leukocytes	0% (0/1)
1.732	5	1	HRH3	3	CXCL10,CXCL3,S100A9	1	Quantity of Ca2+	0% (0/1)
1.732	5	1	HRH3	3	CXCL10,CXCL3,S100A9	1	Chemotaxis of neutrophils	0% (0/1)
1.732	5	1	HRH3	3	CXCL10,CXCL3,S100A9	1	Chemotaxis of granulocytes	0% (0/1)
1.732	5	1	alpha-tocopherol	3	CXCL3,HMOX1,IL6	1	Cell viability	100% (1/1)
1.732	5	1	alpha-tocopherol	3	CXCL3,HMOX1,IL6	1	Metastasis	0% (0/1)
1.732	5	1	alpha-tocopherol	3	CXCL3,HMOX1,IL6	1	Advanced malignant tumor	0% (0/1)
1.732	5	1	alpha-tocopherol	3	CXCL3,HMOX1,IL6	1	Immune response of phagocytes	0% (0/1)
1.732	5	1	alpha-tocopherol	3	CXCL3,HMOX1,IL6	1	Transport of metal	0% (0/1)
1.732	5	1	alpha-tocopherol	3	CXCL3,HMOX1,IL6	1	Migration of phagocytes	0% (0/1)
1.732	5	1	alpha-tocopherol	3	CXCL3,HMOX1,IL6	1	Immune response of myeloid cells	0% (0/1)
1.732	5	1	TP73	3	Ccl2,IL6,TPX2	1	Growth of liver tumor	0% (0/1)
1.732	5	1	Vegf	3	Ccl2,IL6,TPX2	1	Growth of liver tumor	0% (0/1)
1.732	5	1	RAF1	3	AREG,IL6,PLAU	1	Liver Regeneration	0% (0/1)
1.732	5	1	NUP98-DDX10	3	C3AR1,C5AR1,LYZ	1	Recruitment of phagocytes	0% (0/1)
1.732	5	1	NUP98-DDX10	3	C3AR1,C5AR1,MSR1	1	Immune response of leukocytes	0% (0/1)
1.732	5	1	NUP98-DDX10	3	C3AR1,C5AR1,LYZ	1	Recruitment of granulocytes	0% (0/1)
1.732	5	1	NUP98-DDX10	3	C3AR1,C5AR1,MSR1	1	Response of mononuclear leukocytes	0% (0/1)
1.732	5	1	sirolimus	3	Ccl2,IL6,ODC1	1	Growth of liver tumor	0% (0/1)
1.732	5	1	eltanexor	3	CCNA2,CCNE1,CDC6	1	Cell proliferation of fibroblasts	0% (0/1)
1.732	5	1	inosine	3	C3,C4A/C4B,CFB	1	Increased Levels of Blood Urea Nitrogen	0% (0/1)
1.732	5	1	CD28	3	CCNE1,IL6,ODC1	1	Liver Regeneration	0% (0/1)
1.732	5	1	TCF/LEF	3	CCN4,IL6,SERPINE1	1	Inflammatory response	0% (0/1)
1.732	5	1	TCF/LEF	3	BIRC5,IL6,SERPINE1	1	Angiogenesis	0% (0/1)
1.732	5	1	TCF/LEF	3	BIRC5,IL6,MITF	1	Leukopoiesis	100% (1/1)
1.732	5	1	TCF/LEF	3	CCN4,IL6,SERPINE1	1	Cell proliferation of fibroblasts	0% (0/1)
1.732	5	1	CD3E	3	CCL17,CCL22,IL6	1	Quantity of metal	100% (1/1)
1.732	5	1	CD3E	3	CCL17,CCL22,IL6	1	Recruitment of leukocytes	0% (0/1)
1.732	5	1	CD3E	3	CCL17,CCL22,IL6	1	Chemotaxis of leukocytes	0% (0/1)
1.732	5	1	CD3E	3	CCL17,CCL22,IL6	1	Migration of phagocytes	0% (0/1)
1.732	5	1	CD3E	3	CCL17,CCL22,IL6	1	Activation of granulocytes	0% (0/1)
1.732	5	1	tributyrin	3	BCL2A1,IL6,INHBA	1	Differentiation of T lymphocytes	0% (0/1)
1.732	5	1	miR-17-5p (and other miRNAs w/seed AAAGUGC)	3	Ccl2,ESR1,IL6	1	Binding of tumor cell lines	0% (0/1)
1.732	5	1	miR-17-5p (and other miRNAs w/seed AAAGUGC)	3	CCNE1,ESR1,IL6	1	Cell proliferation of fibroblasts	0% (0/1)
1.732	5	1	rottlerin	3	Ccl2,CIITA,CXCL3	1	Lymphocyte migration	0% (0/1)
1.732	5	1	rottlerin	3	Ccl2,CIITA,CXCL3	1	Migration of lymphatic system cells	0% (0/1)
1.732	5	1	COMMD3-BMI1	3	CCNE1,HOXA4,IL6	1	Proliferation of muscle cells	0% (0/1)
1.732	5	1	IRF2	3	CD14,IL6,LCN2	1	Activation of granulocytes	0% (0/1)
1.732	5	1	RGS1	3	CCL3L3,CXCL2,INHBA	1	Chemotaxis of phagocytes	0% (0/1)
1.732	5	1	RGS1	3	CCL3L3,CXCL2,INHBA	1	Chemotaxis of myeloid cells	0% (0/1)
1.732	5	1	L-glutamic acid	3	CCNE1,IL18,PPARGC1A	1	Proliferation of muscle cells	0% (0/1)
1.732	5	1	SCGB3A2	3	CTSS,MMP12,MMP14	1	Migration of phagocytes	0% (0/1)
1.732	5	1	SCGB3A2	3	CTSS,MMP12,MMP14	1	Cell movement of myeloid cells	0% (0/1)
1.732	5	1	SCGB3A2	3	CTSS,MMP12,MMP14	1	Cell movement of mononuclear leukocytes	0% (0/1)
1.732	5	1	collagen type i (family)	3	CCL2,MMP19,SERPINE1	1	Binding of tumor cell lines	0% (0/1)
1.732	5	1	MFSD2A	3	FASN,HK2,IDH1	1	Cell viability	100% (1/1)
1.732	5	1	GSK2816126	3	Ccl2,CXCL10,IL6	1	Phagocytosis	0% (0/1)
1.732	5	1	GSK2816126	3	Ccl2,CXCL10,IL6	1	Activation of macrophages	0% (0/1)
1.732	5	1	GSK2816126	3	Ccl2,IL6,TNFSF10	1	Growth of liver tumor	0% (0/1)
1.732	5	1	BCR-ABL1	3	CSF2RB,HMOX1,LCN2	1	Phagocytosis of myeloid cells	0% (0/1)
1.732	5	1	BCR-ABL1	3	CSF2RB,HMOX1,LCN2	1	Phagocytosis of phagocytes	0% (0/1)
1.732	5	1	BCR-ABL1	3	CSF2RB,HMOX1,LCN2	1	Response of myeloid leukocytes	0% (0/1)
1.732	5	1	aflatoxin B1	3	CENPA,Ly6a (includes others),TPX2	1	Growth of hepatocellular carcinoma	0% (0/1)
1.732	5	1	SB203580	3	CCL2,CCL4,SPP1	1	Migration of hepatic stellate cells	0% (0/1)
1.732	5	1	SB203580	3	C3,C3AR1,THBS1	1	Reperfusion injury of kidney	0% (0/1)
1.732	5	1	SAHM1	3	BHLHE40,CD44,OSM	1	Immune response of cells	0% (0/1)
1.732	5	1	SAHM1	3	BHLHE40,CD44,OSM	1	Activation of T lymphocytes	0% (0/1)
1.732	5	1	SAHM1	3	BHLHE40,CD44,OSM	1	Activation of lymphoid cells	0% (0/1)
1.732	5	1	CD2	3	CCNA2,CCNB1,CD44	1	Cell proliferation of fibroblasts	0% (0/1)
1.732	5	1	CD2	3	CD44,CD80,CD86	1	Accumulation of leukocytes	0% (0/1)
1.732	5	1	Klra7 (includes others)	3	CCL3L3,CCL4,TYROBP	1	Cell movement of macrophages	0% (0/1)
1.732	5	1	Klra7 (includes others)	3	CCL3L3,CCL4,TYROBP	1	Adhesion of immune cells	0% (0/1)
1.732	5	1	Klra7 (includes others)	3	CCL3L3,CCL4,TYROBP	1	Interaction of leukocytes	0% (0/1)
1.732	5	1	Klra7 (includes others)	3	CCL3L3,CCL4,TYROBP	1	Adhesion of blood cells	0% (0/1)
1.732	5	1	Klra7 (includes others)	3	CCL3L3,CCL4,TYROBP	1	Migration of antigen presenting cells	0% (0/1)
1.732	5	1	maraviroc	3	Ccl2,CCL4,CXCL10	1	Activation of macrophages	0% (0/1)
1.732	5	1	maraviroc	3	Ccl2,CCL4,CXCL10	1	Cell movement of neutrophils	0% (0/1)
1.732	5	1	maraviroc	3	Ccl2,CCL4,CXCL10	1	Cell movement of granulocytes	0% (0/1)
1.732	5	1	maraviroc	3	Ccl2,CCL4,CXCL10	1	Chemotaxis of phagocytes	0% (0/1)
1.732	5	1	maraviroc	3	Ccl2,CCL4,CXCL10	1	Hypersensitive reaction	0% (0/1)
1.732	5	1	maraviroc	3	Ccl2,CCL4,CXCL10	1	Recruitment of phagocytes	0% (0/1)
1.732	5	1	maraviroc	3	Ccl2,CCL4,CXCL10	1	Cell movement of macrophages	0% (0/1)
1.732	5	1	maraviroc	3	Ccl2,CCL4,CXCL10	1	Binding of leukocytes	0% (0/1)
1.732	5	1	maraviroc	3	Ccl2,CCL4,CXCL10	1	Interaction of leukocytes	0% (0/1)
1.732	5	1	maraviroc	3	Ccl2,CCL4,CXCL10	1	Adhesion of blood cells	0% (0/1)
1.732	5	1	maraviroc	3	Ccl2,CCL4,CXCL10	1	Homing of leukocytes	0% (0/1)
1.732	5	1	maraviroc	3	Ccl2,CCL4,CXCL10	1	Activation of myeloid cells	0% (0/1)
1.732	5	1	maraviroc	3	Ccl2,CCL4,CXCL10	1	Activation of antigen presenting cells	0% (0/1)
1.732	5	1	maraviroc	3	Ccl2,CCL4,CXCL10	1	Recruitment of myeloid cells	0% (0/1)
1.732	5	1	maraviroc	3	Ccl2,CCL4,CXCL10	1	Cellular infiltration by myeloid cells	0% (0/1)
1.732	5	1	maraviroc	3	Ccl2,CCL4,CXCL10	1	Cellular infiltration by phagocytes	0% (0/1)
1.732	5	1	maraviroc	3	Ccl2,CCL4,CXCL10	1	Migration of phagocytes	0% (0/1)
1.732	5	1	maraviroc	3	Ccl2,CCL4,CXCL10	1	Chemotaxis of myeloid cells	0% (0/1)
1.732	5	1	maraviroc	3	Ccl2,CCL4,CXCL10	1	Migration of antigen presenting cells	0% (0/1)
1.732	5	1	maraviroc	3	Ccl2,CCL4,CXCL10	1	Recruitment of antigen presenting cells	0% (0/1)
1.732	5	1	miR-199a-5p (and other miRNAs w/seed CCAGUGU)	3	C3,LCN2,SFTPA1	1	Phagocytosis of phagocytes	0% (0/1)
1.732	5	1	miR-199a-5p (and other miRNAs w/seed CCAGUGU)	3	C3,LCN2,SFTPA1	1	Immune response of neutrophils	0% (0/1)
1.732	5	1	miR-199a-5p (and other miRNAs w/seed CCAGUGU)	3	C3,LCN2,SFTPA1	1	Phagocytosis of myeloid cells	0% (0/1)
1.732	5	1	miR-199a-5p (and other miRNAs w/seed CCAGUGU)	3	C3,LCN2,SFTPA1	1	Engulfment of phagocytes	0% (0/1)
1.732	5	1	miR-199a-5p (and other miRNAs w/seed CCAGUGU)	3	C3,LCN2,SFTPA1	1	Engulfment of myeloid cells	0% (0/1)
1.732	5	1	miR-199a-5p (and other miRNAs w/seed CCAGUGU)	3	C3,LCN2,SFTPA1	1	Response of neutrophils	0% (0/1)
1.732	5	1	IL10RA	3	C3,CFB,IL6	1	Increased Levels of Creatinine	0% (0/1)
1.732	5	1	CUL3	3	CCNE1,IL6,S100A9	1	Cell proliferation of fibroblasts	0% (0/1)
1.732	5	1	CUL3	3	CCNE1,IL6,S100A9	1	Growth of solid tumor	0% (0/1)
1.732	5	1	TRAF3	3	CXCL10,CXCL2,CXCL3	1	Chemotaxis of neutrophils	0% (0/1)
1.732	5	1	NR4A3	3	Ccl2,CXCL3,SCG2	1	Chemotaxis of granulocytes	0% (0/1)
1.732	5	1	NR4A3	3	Ccl2,CXCL3,IL6	1	Accumulation of granulocytes	0% (0/1)
1.732	5	1	RHOA	3	CCNE1,IL6,PLAU	1	Liver Regeneration	0% (0/1)
1.732	5	1	ADA	3	ADORA1,CXCL2,CXCL3	1	Transport of ion	100% (1/1)
1.732	5	1	SLC9A3R1	3	CFTR,CXCL2,CXCL3	1	Transport of ion	100% (1/1)
1.732	5	1	ARRB2	3	ADRA2A,CXCL2,CXCL3	1	Transport of ion	0% (0/1)
1.732	5	1	2-mercaptoacetate	3	CXCL2,CXCL3,IGF1	1	Transport of ion	0% (0/1)
1.667	11	1	azoxymethane	9	Ccl2,CCL3L3,CCL4,CXCL10,CXCL2,CXCL3,IGFBP3,IL18,IL6	1	Cellular infiltration by leukocytes	100% (1/1)
1.667	11	1	HIF1A	9	Ccl2,CCL2,CCL3L3,CCL4,CXCL10,CXCL2,CXCL3,ITGB2,TAC1	1	Chemotaxis of neutrophils	0% (0/1)
1.667	11	1	STAT5a/b	9	ARG1,BCL2A1,FCGR1A,FOXP3,IGF1,OSM,PAX5,PF4,PIM1	1	Cellular homeostasis	100% (1/1)
1.65	20	1	isoproterenol	18	ACSL4,ALOX15,APLNR,ATP1A1,AURKA,CAV1,Ccl2,CD68,CDK1,HMOX1,IL18,IL6,LGALS3,MITF,MYH7,ODC1,PNPLA2,SOD2	1	Neoplasia of cells	0% (0/1)
1.633	8	1	MITF	6	CD44,GPNMB,KIT,LGALS3,PLK1,TPX2	1	Growth of solid tumor	0% (0/1)
1.633	8	1	RNF31	6	CCL4,CXCL2,IL18,IL1R2,IL24,IL6	1	Synthesis of reactive oxygen species	0% (0/1)
1.633	8	1	halofuginone	6	C4A/C4B,CD44,CTSK,CTSS,CXCL10,SPP1	1	Cell movement of phagocytes	0% (0/1)
1.633	8	1	NFkB (complex)	6	BIRC5,C3,IL1RN,IL6,ODC1,PLAU	1	Liver Regeneration	100% (1/1)
1.633	8	1	cyclic AMP	6	ADRA2A,GCH1,IGF1,IL6,SOD2,TRH	1	Transport of metal	0% (0/1)
1.633	8	1	PRL	6	CCL2,CXCL10,EGF,IL6,PIM1,SPP1	1	Accumulation of blood cells	0% (0/1)
1.633	8	1	lactosylceramide	6	Ccl2,CIITA,CXCL10,HLA-DQA1,IL6,TNFRSF11A	1	Leukopoiesis	0% (0/1)
1.633	8	1	IRF1	6	CIITA,CXCL10,FOXP3,IL6,IRF4,SPI1	1	Quantity of CD4+ T-lymphocytes	100% (1/1)
1.633	8	1	IL22	6	C3,CCL22,CXCL2,CXCL3,CYBA,LBP	1	Respiratory burst	0% (0/1)
1.604	16	1	IFNAR1	14	CCL17,CCL3L3,CCL4,CH25H,CXCL10,CXCL11,CXCL2,CXCL3,CXCL6,IL18,IL6,PLA2G7,SERPINE1,THBS1	1	Chemotaxis of leukocytes	0% (0/1)
1.604	16	1	IFNAR1	14	CCL3L3,CCL4,CIITA,CLEC4E,CXCL10,CXCL2,CXCL3,CXCL6,IL18,IL6,SERPINE1,SOD2,THBS1,VCAN	1	Recruitment of myeloid cells	100% (1/1)
1.604	16	1	IFNAR1	14	CCL3L3,CCL4,CIITA,CLEC4E,CXCL10,CXCL2,CXCL3,CXCL6,IL18,IL6,SERPINE1,SOD2,THBS1,VCAN	1	Recruitment of phagocytes	100% (1/1)
1.604	16	1	tyrphostin AG490	14	BIRC5,CCL2,CFTR,CXCL2,ESR1,FOXP3,IGF1,IGF2,IL6,PDCD1,PTTG1,PTX3,SOD2,SPP1	1	Lung cancer	0% (0/1)
1.604	16	1	tyrphostin AG490	14	BIRC5,CCL2,CFTR,CXCL2,ESR1,FOXP3,IGF1,IGF2,IL6,PDCD1,PTTG1,PTX3,SOD2,SPP1	1	Intrathoracic malignant tumor	0% (0/1)
1.581	12	1	REL	10	CCL2,CCL4,CD80,CD86,CXCL10,CXCL3,F3,IL18,IL6,KDR	1	Adhesion of immune cells	100% (1/1)
1.581	12	1	REL	10	CCL2,CCL4,CD80,CD86,CXCL10,CXCL3,F3,IL18,IL6,KDR	1	Interaction of leukocytes	100% (1/1)
1.581	12	1	REL	10	CCL2,CCL4,CD80,CD86,CXCL10,CXCL3,F3,IL18,IL6,KDR	1	Adhesion of blood cells	100% (1/1)
1.581	12	1	curcumin	10	APOE,Ccl2,CCL2,CXCL3,MMP7,PLAU,PTGES,PTN,SERPINE1,SFTPD	1	Chemotaxis of phagocytes	0% (0/1)
1.581	12	1	curcumin	10	APOE,Ccl2,CCL2,CXCL3,MMP7,PLAU,PTGES,PTN,SERPINE1,SFTPD	1	Chemotaxis of myeloid cells	0% (0/1)
1.549	17	1	KRAS	15	Ccl2,CCL2,CD44,CXCL10,CXCL6,CYBB,F3,IL6,ITGB2,LGALS3,MMP7,SERPINE1,SPP1,TGFBR1,VAV1	1	Migration of granulocytes	0% (0/1)
1.549	17	1	tyrphostin AG490	15	BIRC5,CCL2,CFTR,CXCL2,ESR1,FOXP3,ICOS,IGF1,IGF2,IL6,PDCD1,PTTG1,PTX3,SOD2,SPP1	1	Malignant neoplasm of respiratory system	0% (0/1)
1.512	9	1	CREB1	7	ATP1A1,CD68,CH25H,HMOX1,IL6,SEMA4A,SFTPA1	1	Immune response of antigen presenting cells	0% (0/1)
1.512	9	1	CHUK	7	C3,CXCL10,CXCL3,F3,LCN2,PLAU,PTX3	1	Immune response of neutrophils	0% (0/1)
1.512	9	1	RORA	7	CCNA2,CCNB1,CCNE1,CDC6,IGF1,IL6,S100A9	1	Cell proliferation of fibroblasts	0% (0/1)
1.512	9	1	CDKN1B	7	LGALS3,PAX5,PDCD1,S100A9,SERPINE1,SOD2,TK1	1	Inflammation of body cavity	0% (0/1)
1.508	13	1	ETV6-RUNX1	11	CD83,DNTT,IRF4,IRF5,ITGB2,LAT2,PIM1,SPIB,SPP1,TNFSF10,VAV1	1	T cell development	0% (0/1)
1.5	6	1	beta-estradiol	4	C3,CD44,CFB,THBS1	1	Reperfusion injury of kidney	0% (0/1)
1.5	6	1	TREM2	4	Ccl2,CCL3L3,CD86,LGALS3	1	Migration of antigen presenting cells	100% (1/1)
1.5	6	1	10E,12Z-octadecadienoic acid	4	Ccl2,CCL2,IGFBP3,IL6	1	Migration of granulocytes	0% (0/1)
1.5	6	1	APOA1	4	CAV1,IL6,SLC2A1,SOD2	1	Proliferation of connective tissue cells	0% (0/1)
1.5	6	1	GRN	4	CCL2,CCL4,IGF1,SPP1	1	Migration of hepatic stellate cells	0% (0/1)
1.5	6	1	losartan potassium	4	Ccl2,IL18,IL6,TBX21	1	Response of mononuclear leukocytes	0% (0/1)
1.5	6	1	Nfat (family)	4	CCL2,CCL3L3,CYBB,SERPINE1	1	Migration of phagocytes	0% (0/1)
1.5	6	1	Nfat (family)	4	CCL2,CCL3L3,CYBB,SERPINE1	1	Migration of granulocytes	0% (0/1)
1.5	6	1	Nfat (family)	4	CCL2,CCL3L3,CYBB,SERPINE1	1	Transmigration of cells	0% (0/1)
1.5	6	1	Insulin	4	Ccl2,IL6,ODC1,RRM2	1	Growth of liver tumor	0% (0/1)
1.5	6	1	VCAN	4	C3,LCN2,LGALS3,PLAU	1	Phagocytosis of phagocytes	0% (0/1)
1.5	6	1	VCAN	4	C3,LCN2,LGALS3,PLAU	1	Phagocytosis of myeloid cells	0% (0/1)
1.5	6	1	VCAN	4	C3,LCN2,LGALS3,PLAU	1	Phagocytosis of leukocytes	0% (0/1)
1.5	6	1	NFkB (family)	4	BIRC5,CCL2,IL18,IL6	1	Advanced malignant solid tumor	0% (0/1)
1.5	6	1	NFkB (family)	4	BIRC5,CCL2,IL18,IL6	1	Metastatic solid tumor	0% (0/1)
1.443	14	1	N-cor	12	CTSB,CTSS,CXCL10,CXCL2,ESR1,FABP4,FASN,IDH1,IGF1,IGFBP3,MMP12,OLR1	1	Cell movement	100% (1/1)
1.414	4	1	APLN	2	NCF1,PPARGC1A	1	Production of reactive oxygen species	100% (1/1)
1.414	10	1	diclofenac	8	AREG,IL24,IL6,LGALS3,SERPINE1,SLC2A1,SOD2,TNFRSF12A	1	Inflammation of body cavity	100% (1/1)
1.414	10	1	benzo(a)pyrene	8	CCL1,HMOX1,HP,INHBA,LCP1,SERPINA1,SERPINE1,THBS1	1	Cell movement of myeloid cells	100% (1/1)
1.414	10	1	NCOA3	8	CCNE1,FASN,HMOX1,IGF1,KDR,Muc1,SLC16A3,SLC2A1	1	Metastasis	100% (1/1)
1.342	7	1	IRF8	5	CD74,CD86,CTSS,CYBB,IL6	1	Transmigration of cells	0% (0/1)
1.342	7	1	TAL1	5	C3AR1,CCNE1,KIT,NCAPG,TNFSF10	1	Growth of solid tumor	100% (1/1)
1.342	7	1	TCF7L2	5	CD44,MMP7,PLAU,PLAUR,SPP1	1	Migration of granulocytes	0% (0/1)
1.342	7	1	fulvestrant	5	C3,CAV1,CCL2,CXCL10,IGF1	1	Lung injury	100% (1/1)
1.342	7	1	E2F6	5	CCNE1,CDC6,RAD51,RRM2,SERPINE1	1	Growth of tumor	0% (0/1)
1.342	22	1	AREG	20	BIRC5,C3,CCNA2,CCNB1,CDC20,CDCA8,CENPA,CENPF,IL6,IQGAP3,ITGB8,KIF14,MKI67,PLAU,PLK1,PRC1,PTX3,RRM2,SLC36A1,TOP2A	1	Liver cancer	100% (1/1)
1.342	22	1	AREG	20	BIRC5,C3,CCNA2,CCNB1,CDC20,CDCA8,CENPA,CENPF,IL6,IQGAP3,ITGB8,KIF14,MKI67,PLAU,PLK1,PRC1,PTX3,RRM2,SLC36A1,TOP2A	1	Liver tumor	100% (1/1)
1.315	39	1	CCND1	37	AREG,ASPM,AURKA,BIRC5,CCNA2,CCNE1,CD44,CDC6,CDCA2,CENPF,CIP2A,DEPDC1,E2F7,E2F8,EREG,HJURP,KIF11,KIF20B,KIF2C,KNL1,MAGI2,MELK,MYO7A,PCLAF,PLK1,RACGAP1,RAD51,RBL1,RRM2,SATB1,SPP1,TIAM1,TPX2,TRIP13,TUBA1C,TUBB1,UHRF1	1	Neoplasia of cells	100% (1/1)
1.291	17	1	CKAP2L	15	BIRC5,BUB1,CCNB1,CDC20,CDCA8,CDK1,CENPA,CENPE,CENPF,ESPL1,NCAPG,PLK1,PTTG1,TUBB4A,UBE2C	1	Hepatobiliary neoplasm	100% (1/1)
1.291	17	1	CKAP2L	15	BIRC5,BUB1,CCNB1,CDC20,CDCA8,CDK1,CENPA,CENPE,CENPF,ESPL1,NCAPG,PLK1,PTTG1,TUBB4A,UBE2C	1	Hepatobiliary system cancer	0% (0/1)
1.265	12	1	TCL1A	10	C1QA,CD300LD,CXCL3,CYBB,ITGB2,Ly6a (includes others),MARCO,MSR1,RGS1,S100A9	1	Adhesion of immune cells	0% (0/1)
1.251	25	1	AREG	23	BIRC5,C3,CCNA2,CCNB1,CDC20,CDCA8,CENPA,CENPF,ELF3,EREG,HJURP,IL6,IQGAP3,ITGB8,KIF14,MKI67,PLAU,PLK1,PRC1,PTX3,RRM2,SLC36A1,TOP2A	1	Hepato-pancreato-biliary cancer	100% (1/1)
1.225	8	1	NR3C2	6	APOE,Ccl2,CCL2,HLA-DQB1,IGF1,IL6	1	Activation of T lymphocytes	0% (0/1)
1.225	8	1	ionomycin	6	CCL2,CD4,CXCL10,IL6,ITGB2,SPP1	1	Chemotaxis of leukocytes	0% (0/1)
1.206	13	1	HTT	11	APOE,CD74,CNR2,NPY,PENK,PLAUR,SERPINA1,SERPING1,SPP1,TAC1,THBS2	1	Binding of leukocytes	0% (0/1)
1.206	13	1	HTT	11	APOE,CD74,CNR2,NPY,PENK,PLAUR,SERPINA1,SERPING1,SPP1,TAC1,THBS2	1	Interaction of leukocytes	0% (0/1)
1.155	5	1	PP1	3	HMOX1,IL1RN,SERPINE1	1	Cell movement of macrophages	0% (0/1)
1.155	5	1	HCAR2	3	IL6,PLK1,PLK4	1	Invasion of cells	100% (1/1)
1.155	5	1	ZFP91	3	CDK1,HK2,RRM2	1	Growth of tumor	0% (0/1)
1.155	5	1	NOTCH4	3	EFNB2,SERPINE1,TEK	1	Chemotaxis	0% (0/1)
1.155	5	1	PLA2R1	3	ACSL4,CTSA,SOD2	1	Transport of molecule	0% (0/1)
1.155	5	1	PLA2R1	3	ACSL4,CTSD,SOD2	1	Invasion of cells	100% (1/1)
1.155	5	1	taxifolin	3	APOE,IL6,SOD2	1	Quantity of lymphatic system cells	0% (0/1)
1.155	5	1	taxifolin	3	HMOX1,IL6,SOD2	1	Invasion of cells	0% (0/1)
1.155	5	1	taxifolin	3	AIF1,APOE,IL6	1	Chemotaxis of leukocytes	0% (0/1)
1.155	5	1	taxifolin	3	AIF1,APOE,IL6	1	Homing of leukocytes	0% (0/1)
1.155	5	1	taxifolin	3	AIF1,APOE,IL6	1	T cell migration	0% (0/1)
1.155	5	1	taxifolin	3	AIF1,APOE,IL6	1	Migration of lymphatic system cells	0% (0/1)
1.155	5	1	taxifolin	3	HMOX1,IL6,SOD2	1	Stimulation of cells	0% (0/1)
1.155	5	1	mir-223	3	C5AR1,CLEC4E,IL1RN	1	Recruitment of antigen presenting cells	0% (0/1)
1.155	5	1	imatinib	3	BIRC5,CCNE1,IL6	1	Liver Regeneration	0% (0/1)
1.155	14	1	OGA	12	C3AR1,CCL2,CCL3L3,CD14,CD44,CD53,CD68,GAA,GSN,HK3,IL18,PLAU	1	Degranulation of leukocytes	0% (0/1)
1.155	5	1	NSUN6	3	ITGB2,SERPINE1,THBS1	1	Chemotaxis of phagocytes	0% (0/1)
1.155	5	1	NSUN6	3	ITGB2,SERPINE1,THBS1	1	Chemotaxis of myeloid cells	0% (0/1)
1.155	5	1	epigallocatechin-gallate	3	BIRC5,IL6,PLAU	1	Liver Regeneration	0% (0/1)
1.155	5	1	USP22	3	CD80,CSF2RB,CYBB	1	Cell movement of dendritic cells	0% (0/1)
1.155	5	1	palbociclib	3	IGFBP3,MKI67,NCAPG	1	Growth of solid tumor	100% (1/1)
1.155	5	1	EEF1A2	3	CYBB,ITGB2,NCF1	1	Infection of mammalia	0% (0/1)
1.155	5	1	KLF11	3	CAV1,PLAU,PPARGC1A	1	Cardiac contractility	0% (0/1)
1.155	5	1	BCR-ABL1	3	CAV1,HMOX1,LCN2	1	Cardiac contractility	0% (0/1)
1.155	5	1	CFB	3	ACTC1,MYH6,PPARGC1A	1	Cardiac contractility	0% (0/1)
1.155	5	1	KLK5	3	CXCL2,IL18,IL6	1	Hepatocellular carcinoma	0% (0/1)
1.147	21	1	AREG	19	C3,CCNA2,CCNB1,CDC20,CDCA8,CENPA,CENPF,IL6,IQGAP3,ITGB8,KIF14,MKI67,PLAU,PLK1,PRC1,PTX3,RRM2,SLC36A1,TOP2A	1	Liver carcinoma	100% (1/1)
1.134	9	1	VEGFA	7	BTK,CCL2,CCL3L3,Ccl9,CXCL10,CXCL2,CXCL6	1	Mobilization of Ca2+	100% (1/1)
1.134	30	1	AREG	28	ARHGAP11A,BIRC5,C3,CCNA2,CCNB1,CCNF,CDC20,CDCA8,CENPA,CENPF,ELF3,EREG,FOXP3,HJURP,IL6,IQGAP3,ITGB8,KIF14,MKI67,MYBL2,PLAU,PLK1,PRC1,PTAFR,PTX3,RRM2,SLC36A1,TOP2A	1	Abdominal carcinoma	100% (1/1)
1.118	22	1	AREG	20	C3,CCNA2,CCNB1,CDC20,CDCA8,CENPA,CENPF,HJURP,IL6,IQGAP3,ITGB8,KIF14,MKI67,PLAU,PLK1,PRC1,PTX3,RRM2,SLC36A1,TOP2A	1	Hepatobiliary carcinoma	100% (1/1)
1.069	58	1	RELA	56	A2M,APOE,BCL2A1,BHLHE40,BIRC5,C3,CAV1,Ccl2,CCL2,CCL22,CD14,CD44,CD80,CFB,CFTR,CHI3L1,CIITA,CTSB,CXCL10,CXCL11,CXCL2,CXCL3,CXCL6,CYBB,EHF,ELF3,F3,FOXP3,GCH1,HMOX1,HSD11B2,IGF1,IGFBP2,IL1RN,IL6,IRF4,KIT,MMP7,OLR1,P2RY2,PLAU,PLK1,PTGES,PTX3,RGS1,SERPINE2,SFTPA1,SLC2A5,SOD2,SPI1,TAC1,TBX21,TNFAIP2,TNFRSF4,TREM1,UBD	1	Abdominal neoplasm	100% (1/1)
1.069	16	1	Creb	14	AREG,C3AR1,CCN4,CD14,CTSB,CXCL10,DUSP4,IGF1,IL6,MITF,PPARGC1A,SLC2A1,SLC7A11,TRAIP	1	Mammary tumor	0% (0/1)
1.069	16	1	SRC	14	CAV1,CCL2,CCNE1,CDK1,CKM,CTSB,CXCL10,IL6,PLAU,PLAUR,PLK1,SLC2A1,SPP1,TNFRSF11A	1	Mammary tumor	100% (1/1)
1.061	10	1	TPH1	8	ASF1B,CDCA8,CTLA4,NCAPG,PLA2G7,PRC1,RACGAP1,RRM2	1	Hepatocellular carcinoma	0% (0/1)
1.061	10	1	SP1	8	APOE,Ccl2,CCL2,CCL22,CXCL10,KIT,PLAU,SPP1	1	Cell movement of dendritic cells	0% (0/1)
1	6	1	TCF3	4	AREG,BIRC5,CCNE1,IL6	1	Liver Regeneration	0% (0/1)
1	6	1	TCF3	4	IL6,Ly6a (includes others),NCAPG,RRM2	1	Growth of hepatocellular carcinoma	0% (0/1)
1	6	1	IL33	4	AREG,IL1RN,IL6,ODC1	1	Liver Regeneration	0% (0/1)
1	6	1	metformin	4	CCL2,F3,IL6,SERPINE1	1	Migration of granulocytes	0% (0/1)
1	6	1	metformin	4	CCL2,F3,IL1RN,IL6	1	Accumulation of granulocytes	0% (0/1)
1	6	1	PTPN6	4	Ccl2,CCL3L3,CXCL10,ITGB2	1	Chemotaxis of neutrophils	100% (1/1)
1	6	1	DNMT1	4	BIRC5,FOXP3,IGF2,KIT	1	T cell development	100% (1/1)
1	18	1	RABL6	16	BUB1,BUB1B,CCNA2,CCNB1,CENPF,HMMR,HMOX1,MCM10,MELK,NCAPG,PLK1,PRC1,TOP2A,TPX2,TTK,UBE2C	1	Liver cancer	0% (0/1)
1	18	1	RABL6	16	BUB1,BUB1B,CCNA2,CCNB1,CENPF,HMMR,HMOX1,MCM10,MELK,NCAPG,PLK1,PRC1,TOP2A,TPX2,TTK,UBE2C	1	Hepatobiliary system cancer	100% (1/1)
1	6	1	RB1	4	BIRC5,CCNE1,IL6,LRAT	1	Liver Regeneration	0% (0/1)
1	6	1	allopurinol	4	CD44,CXCL10,SPP1,STING1	1	Cell movement of dendritic cells	0% (0/1)
1	6	1	MBTD1	4	CCL4,CCNB1,CXCL3,DUSP2	1	Cell viability	0% (0/1)
1	11	1	BAX	9	CCNB1,CDK1,CTSB,CTSD,CTSK,CTSS,CXCL10,IL6,MMP12	1	Breast or pancreatic cancer	100% (1/1)
1	123	1	CSF2	121	ACP5,ADORA2B,ANLN,AOC1,ARG1,ATP6V0D2,AURKA,BIRC5,BUB1,BUB1B,C3,C4A/C4B,C5AR1,CA4,CCL17,Ccl2,CCL2,CCL3L3,CCL4,CCNA2,CCNB1,CCNF,CCR5,CD14,CD63,CD74,CD80,CD83,CD86,CDC20,CDCA2,CDCA3,CDCA5,CDCA8,CDK1,CENPE,CHAF1B,CIITA,CLEC4E,CSF2RA,CSF2RB,CTLA4,CXCL10,CXCL2,CXCL3,CYBB,DSCC1,DUSP2,E2F7,E2F8,ERCC6L,EXO1,F3,FANCA,FCGR1A,FCGR2B,FOXP3,GCH1,GUSB,HJURP,HK2,HLA-DQB1,HMOX1,ICOS,IGF1,IL1RN,IL24,IL6,INHBA,IRF4…	1	Abdominal cancer	100% (1/1)
0.949	12	1	IL17A	10	C3,CCL4,CD14,CD68,COTL1,CXCL3,GUSB,LCN2,PLAU,S100A9	1	Degranulation of neutrophils	0% (0/1)
0.943	20	1	TBX2	18	ANLN,ASF1B,AURKA,BUB1,CCNA2,CCNB1,CDC6,CDCA3,CDCA5,CDK1,CHAF1B,E2F7,E2F8,MCM5,PKMYT1,PLK1,PRC1,RBL1	1	Neoplasia of cells	100% (1/1)
0.933	117	1	CSF2	115	ANLN,AOC1,ARG1,ATP6V0D2,AURKA,BIRC5,BUB1,BUB1B,C3,C4A/C4B,C5AR1,CA4,CCL17,Ccl2,CCL2,CCL3L3,CCL4,CCNA2,CCNB1,CCNF,CCR5,CD14,CD63,CD74,CD80,CD83,CD86,CDC20,CDCA2,CDCA3,CDCA5,CDCA8,CDK1,CENPE,CIITA,CLEC4E,CSF2RA,CSF2RB,CTLA4,CXCL10,CXCL2,CXCL3,CYBB,DSCC1,DUSP2,E2F7,E2F8,ERCC6L,EXO1,F3,FANCA,FCGR1A,FCGR2B,FOXP3,GCH1,GUSB,HJURP,HK2,HLA-DQB1,HMOX1,ICOS,IGF1,IL1RN,IL24,IL6,INHBA,IRF4,IRF5,ITGAX,KIF11,KN…	1	Digestive system cancer	0% (0/1)
0.905	13	1	PSEN1	11	APOE,C3,C3AR1,CCL3L3,CCL4,CCR5,CD74,CTSS,CXCL2,IGF1,IL6	1	Transmigration of cells	0% (0/1)
0.898	33	1	diethylstilbestrol	31	AREG,BCAT1,BMP15,C1QA,C3,CCNA2,CD83,CENPE,CENPF,CPE,EGF,EREG,ESR1,F3,IGF1,IGFBP2,IGFBP3,INHBA,IQGAP3,KDR,KIF11,MAFB,MKI67,NDRG2,PIGR,PTTG1,SEZ6,SFN,THBS2,TOP2A,VIT	1	Lung tumor	0% (0/1)
0.898	33	1	diethylstilbestrol	31	AREG,BCAT1,BMP15,C1QA,C3,CCNA2,CD83,CENPE,CENPF,CPE,EGF,EREG,ESR1,F3,IGF1,IGFBP2,IGFBP3,INHBA,IQGAP3,KDR,KIF11,MAFB,MKI67,NDRG2,PIGR,PTTG1,SEZ6,SFN,THBS2,TOP2A,VIT	1	Intrathoracic organ tumor	0% (0/1)
0.894	7	1	ATP	5	CD14,CXCL2,CXCL3,F3,IL18	1	Respiratory burst	0% (0/1)
0.894	7	1	QKI	5	CTSS,HLA-DQA1,HLA-DQB1,ITGAX,PPARGC1A	1	Activation of cells	0% (0/1)
0.853	24	1	peptidoglycan	22	BCL2A1,Ccl2,CCL2,CCL3L3,CCL4,CCR5,CCR8,CD80,CD86,CXCL10,CXCL2,CXCL3,CXCL6,FOXP3,HMOX1,IL18,IL1RN,IL6,ITGB2,S100A9,SOD2,TLR5	1	Digestive organ tumor	0% (0/1)
0.816	8	1	DNMT3A	6	BTK,CD4,FOXP3,IRF5,Tcf7,TLR5	1	Differentiation of T lymphocytes	100% (1/1)
0.816	8	1	HAND2	6	ACTC1,CASQ2,IL6,MYH6,MYL4,TNNT2	1	Cardiac contractility	100% (1/1)
0.756	9	1	NOTCH1	7	CD14,CD44,CD68,FCGR2A,FCGR2B,GAA,GRN	1	Degranulation of granulocytes	0% (0/1)
0.756	9	1	SRF	7	CD177,CYBB,GSN,LCN2,P2RX1,S100A9,SERPINB10	1	Degranulation of neutrophils	0% (0/1)
0.743	31	1	l-asparaginase	29	AURKA,BARD1,BIRC5,BUB1,BUB1B,CCNA2,CDC6,CDK1,CENPA,CENPF,DSN1,E2F7,EXO1,FANCD2,FANCI,FASN,KIF18B,KIF20B,KIFC1,KNL1,KNTC1,MIS18BP1,NCAPG,NUPR1,PKMYT1,PLK1,SQLE,TOP2A,UBE2C	1	Liver cancer	0% (0/1)
0.707	20	1	let-7	18	AURKA,BUB1,BUB1B,CCNA2,CCNB1,CD44,CDC6,CDCA2,CDCA8,CDK1,E2F8,HK2,IGF1,IL6,MCM10,PLAUR,RRM2,SERPINE1	1	Hepatocellular carcinoma	100% (1/1)
0.688	21	1	PTGER2	19	AREG,ASPM,AURKA,BUB1B,CCNA2,CENPF,CKS2,CXCL10,ECT2,IL6,MELK,MKI67,NUSAP1,PLK1,PRC1,RACGAP1,SERPINE1,SPP1,TPX2	1	Hepatocellular carcinoma	0% (0/1)
0.686	36	1	ELAVL1	34	BATF,CCNE1,CD68,CD83,CD86,CDC6,CENPA,CENPE,CTSS,FCGR2A,FOXP3,HBB,HLA-DRB5,HMOX1,ICOS,IFI16,IL1R2,IL6,IRF4,KIF11,MYBL2,NCAPG,NUF2,PBK,PDCD1,PIGR,PLA2G7,PRC1,PSAP,SLC7A11,SLC7A7,TBX21,TOP2A,VSIG2	1	Intraabdominal organ tumor	100% (1/1)
0.671	22	1	Alpha catenin	20	ADAMTS4,AREG,CTSB,CXCL10,CXCL2,CXCL6,EGFL6,EREG,IGF1,IGF2,IGFBP2,IL6,LYZ,MMP12,MMP19,PLAU,S100A9,THBS2,TNFAIP2,TSPAN8	1	Genitourinary tumor	0% (0/1)
0.64	63	1	dihydrotestosterone	61	APOE,AREG,BMP15,BUB1B,C4A/C4B,CALCB,CCNA2,CCNB1,CCNE1,CD74,CDC20,CDC6,CHI3L1,CKM,CYBB,DDIAS,DEPDC1,DTL,DUSP4,E2F8,EGF,ESR1,FABP4,FASN,FKBP5,FOXP3,G0S2,GRN,GSN,HSD11B2,IGF1,IGFBP2,IGFBP3,IL6,LYZ,MCM10,MCM5,MMP7,NDRG1,ODC1,PDE9A,PLAU,SERPINE2,SLC16A6,SLC2A1,SLC2A5,SLC7A7,SNAI3,SPP1,SQLE,SRD5A1,SRD5A2,SYP,TGFBR1,THBS1,TNFSF10,TNNI3,TRIP13,VCAN,WNT7B,ZBTB16	1	Malignant genitourinary solid tumor	100% (1/1)
0.64	63	1	dihydrotestosterone	61	APOE,AREG,BMP15,BUB1B,C4A/C4B,CALCB,CCNA2,CCNB1,CCNE1,CD74,CDC20,CDC6,CHI3L1,CKM,CYBB,DDIAS,DEPDC1,DTL,DUSP4,E2F8,EGF,ESR1,FABP4,FASN,FKBP5,FOXP3,G0S2,GRN,GSN,HSD11B2,IGF1,IGFBP2,IGFBP3,IL6,LYZ,MCM10,MCM5,MMP7,NDRG1,ODC1,PDE9A,PLAU,SERPINE2,SLC16A6,SLC2A1,SLC2A5,SLC7A7,SNAI3,SPP1,SQLE,SRD5A1,SRD5A2,SYP,TGFBR1,THBS1,TNFSF10,TNNI3,TRIP13,VCAN,WNT7B,ZBTB16	1	Anogenital cancer	100% (1/1)
0.626	25	1	VDR	23	ANLN,BUB1B,Ccl2,CCNB1,CD14,CD44,CDC20,CXCL10,FASN,IGFBP3,IL18,IL6,KIF11,KIF22,NUSAP1,ODC1,PNPLA2,PRC1,S100A9,SPAG5,SPP1,TK1,TPX2	1	Mammary tumor	100% (1/1)
0.577	5	1	E2F1	3	BIRC5,CAV1,CCNE1	1	Liver Regeneration	0% (0/1)
0.577	5	1	concanavalin a	3	CXCL2,IL18,ITGB2	1	Respiratory burst	0% (0/1)
0.577	5	1	Gm12602	3	ANPEP,CPA4,IL24	1	Metastatic solid tumor	0% (0/1)
0.577	5	1	Gm12602	3	ANPEP,CPA4,IL24	1	Advanced malignant solid tumor	0% (0/1)
0.577	5	1	GSK3A	3	PDCD1,SERPINE1,TNFSF10	1	Inflammation of central nervous system	0% (0/1)
0.577	5	1	MBD3	3	ACTC1,APOE,MYH6	1	Cardiac contractility	0% (0/1)
0.577	5	1	CD24	3	CAV1,HMMR,THBS1	1	Growth of solid tumor	100% (1/1)
0.577	5	1	CD24	3	CAV1,CFTR,LAT2	1	Flux of ion	0% (0/1)
0.577	5	1	NTRK2	3	SERPINE1,SPP1,TGFBR1	1	Migration of granulocytes	0% (0/1)
0.577	5	1	NTRK2	3	SERPINE1,SPP1,TGFBR1	1	Transmigration of cells	0% (0/1)
0.577	14	1	cisplatin	12	ANPEP,CD14,CD44,CD53,CD68,CTSB,CXCL3,CYBB,FCGR2A,LCN2,LGALS3,LYZ	1	Degranulation of granulocytes	0% (0/1)
0.557	31	1	FOXM1	29	ASPM,AURKA,BIRC5,BUB1B,CAV1,CCNB1,CCNE1,CDC20,CDK1,CENPE,CENPF,ESR1,HEY2,HSD11B2,IGF1,IL1RN,IL6,KDR,MKI67,MMP7,NUF2,PLAUR,PLK1,PLK4,PRC1,PTTG1,SOD2,TOP2A,VCAN	1	Breast or pancreatic cancer	100% (1/1)
0.557	31	1	HGF	29	AURKA,BUB1,BUB1B,CD44,CDC6,CDK1,CENPF,CXCL2,F3,HK2,IGF1,IGFBP3,IL6,KIF20B,MELK,MKI67,MMP14,PKMYT1,PLAU,PLAUR,PLK1,PRC1,PTTG1,SERPINE1,SPP1,SSTR1,TPX2,TRAIP,UBE2C	1	Hepatocellular carcinoma	100% (1/1)
0.535	16	1	BNIP3L	14	ANK1,AURKA,BLNK,Ccl2,CCNA2,CD19,CENPE,CENPF,FANCD2,GSN,HK2,KIF11,RRM2,TOP2A	1	Hepatobiliary neoplasm	0% (0/1)
0.53	34	1	NUPR1	32	ANK1,AREG,ASPM,AURKA,BUB1,BUB1B,CCNA2,CDCA2,CDCA3,CDCA8,CENPI,DSN1,E2F8,ENO2,EPHA7,ESPL1,EXO1,FANCD2,GCH1,HK2,KIFC1,KNL1,MCM10,MKI67,MMS22L,PLK1,SERPINE1,SLC16A6,SLC2A1,SPP1,STIL,TICRR	1	Liver carcinoma	100% (1/1)
0.53	34	1	17-alpha-ethinylestradiol	32	APOE,AQP3,BCAT1,C1QB,C1QC,C3,Ccl2,CCL3L3,CCR5,CCR8,CD53,CD5L,CD68,CD74,CDK1,CTSS,CXCL10,CXCL3,CXCL6,DSC2,F3,FBLN2,IFI16,IFI30,IGF1,LCN2,LY86,MARCO,MRC1,ODC1,SFN,SLC11A1	1	Abdominal cancer	100% (1/1)
0.5	38	1	FOXM1	36	ASPM,AURKA,BIRC5,BUB1B,CAV1,CCNA2,CCNB1,CCNE1,CCNF,CDC20,CDCA2,CDK1,CENPE,CENPF,CKS2,ESR1,FOXF1,HEY2,HSD11B2,IGF1,IL1RN,IL6,KDR,KIF2C,MKI67,MMP7,NUF2,PLAUR,PLK1,PLK4,PRC1,PTTG1,SFTPD,SOD2,TOP2A,VCAN	1	Cancer of secretory structure	100% (1/1)
0.447	7	1	LHX1	5	ATP1B1,LRP2,SLC47A1,SLC5A8,TRH	1	Transport of ion	0% (0/1)
0.333	11	1	ASPSCR1-TFE3	9	APOE,BHLHE40,CTSD,G0S2,GPNMB,HMOX1,NPC2,PPARGC1A,SOD2	1	Mammary tumor	0% (0/1)
0.333	11	1	TBX5	9	CCL2,CCL3L3,CCL4,CXCL2,CXCL6,IFI16,IL6,MYH6,MYL7	1	Inflammation of body cavity	0% (0/1)
0.333	11	1	Calmodulin	9	CD44,CPNE5,F3,KDR,LGI3,LRRTM3,OPCML,S1PR3,SEZ6	1	Cancer of cells	0% (0/1)
0.316	12	1	MEF2C	10	Ccl2,CCL2,CCL3L3,CCL4,CCR5,CXCL2,CXCL6,HDAC9,IL6,PPARGC1A	1	Inflammatory response	0% (0/1)
0.302	13	1	2-(4-amino-1-isopropyl-1H-pyrazolo[3,4-d]pyrimidin-3-yl)-1H-indol-5-ol	11	ASF1B,AURKA,CCNB1,CD44,CDC6,CDCA2,EXO1,KIF14,MCM10,NCAPG,TOP2A	1	Hepatocellular carcinoma	0% (0/1)
0.277	15	1	E2f	13	CCNA2,CCNB1,CCNE1,CDC6,CDK1,E2F8,IGF1,MCM10,NUSAP1,RRM2,SERPINE1,TPX2,UBE2C	1	Hepatocellular carcinoma	0% (0/1)
0.243	19	1	Rb	17	BIRC5,BUB1,CCL2,CCNA2,CCNB1,CCNE1,CDC6,CDK1,ECT2,MCM5,MYBL2,PLK1,PPARGC1A,PTTG1,RBL1,SOD2,TOP2A	1	Malignant genitourinary solid tumor	100% (1/1)
0	7	1	GABARAP	5	CSTB,CTSB,GUSB,NPC2,PSAP	1	Degranulation of neutrophils	0% (0/1)
0	7	1	GABARAP	5	CSTB,CTSB,GUSB,NPC2,PSAP	1	Degranulation of granulocytes	0% (0/1)
0	7	1	GABARAPL1	5	CSTB,CTSB,GUSB,NPC2,PSAP	1	Degranulation of neutrophils	0% (0/1)
0	7	1	GABARAPL1	5	CSTB,CTSB,GUSB,NPC2,PSAP	1	Degranulation of granulocytes	0% (0/1)
0	5	1	SIGLEC8	3	CD53,CSTB,FTL	1	Degranulation of neutrophils	0% (0/1)
0	5	1	SIGLEC8	3	CD53,CSTB,FTL	1	Degranulation of granulocytes	0% (0/1)
0	6	1	Nppb	4	ACTC1,CSRP3,MYBPC3,MYH7	1	Liver tumor	0% (0/1)
0	15	1	Bvht	13	ACTC1,CSRP3,IGF2,KDR,MMP19,MYBPC3,MYH6,MYH7,MYL4,MYOM1,SMPX,TNNT2,UNC45B	1	Liver tumor	0% (0/1)
0	6	1	SMOC2	4	CCNB1,CDK1,CENPF,MCM10	1	Hepatocellular carcinoma	0% (0/1)
0	6	1	SMOC2	4	CCNB1,CDK1,CENPF,MCM10	1	Lung cancer	0% (0/1)
0	6	1	SMOC2	4	CCNB1,CDK1,CENPF,MCM10	1	Hepatobiliary system cancer	100% (1/1)
0	6	1	SMOC2	4	CCNB1,CDK1,CENPF,MCM10	1	Lung tumor	0% (0/1)
0	6	1	SMOC2	4	CCNB1,CDK1,CENPF,MCM10	1	Hepatobiliary carcinoma	100% (1/1)
0	6	1	SMOC2	4	CCNB1,CDK1,CENPF,MCM10	1	Intrathoracic malignant tumor	0% (0/1)
0	6	1	SMOC2	4	CCNB1,CDK1,CENPF,MCM10	1	Mammary tumor	0% (0/1)
0	11	1	KDM5B	9	AURKA,BUB1B,CCNB1,CCNE1,CDK1,ECT2,ESR1,TNFSF13,TOP2A	1	Hepatocellular carcinoma	0% (0/1)
0	24	1	KDM5B	22	AURKA,BUB1B,CAV1,CCNB1,CCNE1,CDCA3,CDK1,ECT2,ESR1,FABP5,HMMR,IGFBP2,KIF2C,MCM5,NDC80,PBK,RNASET2,TAL1,TNFSF13,TOP2A,TTK,WNT7B	1	Cancer of secretory structure	100% (1/1)
0	6	1	TDGF1	4	MYH6,MYH7,MYL2,MYL7	1	Lung cancer	0% (0/1)
0	6	1	TDGF1	4	MYH6,MYH7,MYL2,MYL7	1	Lung tumor	0% (0/1)
0	6	1	TDGF1	4	MYH6,MYH7,MYL2,MYL7	1	Intrathoracic malignant tumor	0% (0/1)
0	7	1	GABARAPL2	5	CSTB,CTSB,GUSB,NPC2,PSAP	1	Degranulation of neutrophils	0% (0/1)
0	7	1	GABARAPL2	5	CSTB,CTSB,GUSB,NPC2,PSAP	1	Degranulation of granulocytes	0% (0/1)
0	12	1	NRG1	10	CCNE1,CKS2,HK2,IGF2,MYH6,PLAU,PLAUR,SERPINE1,SLC2A1,TOP2A	1	Hepatocellular carcinoma	0% (0/1)
0	10	1	PTC-209	8	ACTN2,COL16A1,FBLN2,FHOD3,IL6,MYH6,TNNC1,TNNT2	1	Mammary tumor	0% (0/1)
0	10	1	MM-589	8	ACTN2,COL16A1,FBLN2,FHOD3,IL6,MYH6,TNNC1,TNNT2	1	Mammary tumor	0% (0/1)
0	11	1	levodopa	9	CD63,COTL1,CTSB,CTSZ,DPP7,FTL,HVCN1,NPC2,PSAP	1	Degranulation of neutrophils	0% (0/1)
0	15	1	SPIB	13	APOE,BTK,CCR5,CD300C,CD80,CLEC10A,GNA15,IL18,KDR,KIT,NRXN2,PRDX5,RAD51	1	Mammary tumor	0% (0/1)
0	21	1	SPIB	19	APOE,BLNK,BTK,CCR5,CD300C,CD80,CD86,CLEC10A,GEM,GNA15,IL18,IRF4,KDR,KIT,LILRB3,NRXN2,P2RY6,PRDX5,RAD51	1	Malignant genitourinary solid tumor	100% (1/1)
0	21	1	SPIB	19	APOE,BLNK,BTK,CCR5,CD300C,CD80,CD86,CLEC10A,GEM,GNA15,IL18,IRF4,KDR,KIT,LILRB3,NRXN2,P2RY6,PRDX5,RAD51	1	Anogenital cancer	100% (1/1)
-0.912	79	1	ESR1	77	ACTC1,ADCY1,ANLN,APOE,AREG,ASPM,ATP1B1,AURKA,BCAT1,BIRC5,BUB1,BUB1B,C3,CAP2,CCL2,CCNA2,CCNB1,CCNE1,CDCA8,CDK1,CENPA,CENPE,CENPF,CENPU,CLDN4,CLEC1B,CNN1,COL13A1,COL16A1,COTL1,CP,CTSB,CTSD,DIAPH3,DUSP4,EFNB2,EGF,ERBB4,F3,FASN,GAS7,GJB1,GSN,HMGCS2,HPX,IGF1,IGF2,IGFBP2,IGFBP3,IL6,IRF5,KNL1,LBP,MAPT,MKI67,NCAPG,OLR1,P2RY2,PLAU,PLAUR,PPARGC1A,PPP1R3C,PTTG1,PTX3,RAI2,SCUBE2,SERPINE1,SLC6A4,SLC7A1,SLC7A1…	1	Liver tumor	100% (1/1)
-0.985	68	1	HRAS	66	A2M,ACTA1,ADRA2A,AREG,ATP1A3,AURKA,BIRC5,C1QC,CAPG,CAV1,Ccl2,CCNA2,CCNB1,CCNE1,CD44,CDK1,CFB,CGREF1,CNN1,CTSB,CTSS,CTSZ,CXCL10,CXCL11,CXCL2,CXCL3,DUSP4,DUSP9,EREG,FABP3,FASN,FBLN2,GADD45G,GIMAP1,GRN,GSN,GUSB,HEY2,HMOX1,IFI30,IGF2,IGFBP3,IL24,IL6,LYZ,MMP12,MMP14,OSM,PCDHGA1,PLAU,PLAUR,PLK1,RRM2,SERPINA3,SERPINE1,SERPINE2,SOAT1,SPP1,SPSB4,SQLE,THBS1,TK1,TMOD2,TOP2A,TPH1,VCAN	1	Tumorigenesis of tissue	100% (1/1)
-1.395	76	1	TCF3	74	ANLN,AREG,ASF1B,AURKA,BHLHA15,BIRC5,BLNK,BUB1,CASP6,CCNA2,CCNB1,CCNE1,CCR8,CD200R1,CD4,CD79B,CDC20,CDCA3,CDK1,CEP55,CGREF1,CIP2A,CKM,CKS2,DNTT,E2F8,ECT2,EPB42,ESCO2,ESR1,FOXP3,GM2A,HMMR,ICOS,IFI16,IL6,IRF4,KCNN4,KIF11,KIF2C,KIT,LILRB4,Ly6a (includes others),MKI67,MYL4,NCAPG,NDC80,NUF2,NUPR1,NUSAP1,PAX5,PDCD1,PLK4,PRC1,PSAP,RAB33A,RACGAP1,RASA4,RASSF4,RRM2,SCN4A,SDF2L1,SEMA3G,SEMA4A,SLAMF7,SLC7A5,…	1	Carcinoma	100% (1/1)
-1.441	41	1	TNF	39	ANPEP,ARG1,C3,C3AR1,C5AR1,CCL4,CD14,CD44,CHI3L1,CLEC5A,COTL1,CTSB,CTSS,CTSZ,CXCL3,CYBA,CYBB,FABP5,FCGR2B,GM2A,GPR84,GRN,GUSB,HK3,HP,ITGAX,ITGB2,LCN2,LGALS3,OLR1,PIGR,PLAU,PLAUR,PTX3,S100A9,SERPINA3,SERPINB10,SLC11A1,TREM1	1	Degranulation of granulocytes	100% (1/1)
-1.83	45	1	FOXO1	43	ANLN,ASPM,BANK1,BIRC5,C1QA,CASP6,CAV1,CCL4,CCNB1,CD79B,CDK1,CENPF,CKMT2,CTSK,CXCL10,FABP4,FABP5,FASN,FOXC1,FOXP3,HMOX1,IGF1,IL18,IL6,KIF11,LRAT,MB,NPC1,NUSAP1,PBK,PDCD1,PNPLA2,PPARGC1A,PRC1,SERPINE1,SFN,SOD2,SQLE,TBX21,THBS1,TNFRSF9,TNFSF10,TNNC1	1	Breast or pancreatic cancer	100% (1/1)
-2.121	34	1	mir-21	32	ANLN,ASPM,CCL17,Ccl2,CCL2,CCL3L3,CCNA2,CCNB1,CD19,CKS2,CXCL10,CXCL2,ECT2,IFI16,IL18,IL6,KIFC1,KNTC1,MARCO,MKI67,NCAPG,NUSAP1,PILRB,PRC1,RACGAP1,SIGLEC1,SOD2,TBX21,TIAM1,TLR1,TNFRSF9,TOP2A	1	Hepato-pancreato-biliary cancer	100% (1/1)
-2.216	68	1	HRAS	66	A2M,ACTA1,ADRA2A,AREG,ATP1A3,AURKA,BIRC5,C1QC,CAPG,CAV1,Ccl2,CCNA2,CCNB1,CCNE1,CD44,CDK1,CFB,CGREF1,CNN1,CTSB,CTSS,CTSZ,CXCL10,CXCL11,CXCL2,CXCL3,DUSP4,DUSP9,EREG,FABP3,FASN,FBLN2,GADD45G,GIMAP1,GRN,GSN,GUSB,HEY2,HMOX1,IFI30,IGF2,IGFBP3,IL24,IL6,LYZ,MMP12,MMP14,OSM,PCDHGA1,PLAU,PLAUR,PLK1,RRM2,SERPINA3,SERPINE1,SERPINE2,SOAT1,SPP1,SPSB4,SQLE,THBS1,TK1,TMOD2,TOP2A,TPH1,VCAN	1	Non-hematological solid tumor	100% (1/1)
-2.496	15	1	AR	13	BMF,C3,C4A/C4B,CCL17,Ccl2,CCL3L3,IL6,NPC1,PLAU,SPP1,THBS1,TNFSF10,ZBTB16	1	Accumulation of blood cells	0% (0/1)
-2.51	86	1	dextran sulfate	84	ADORA2B,ANLN,ARG1,AURKA,BIRC5,BUB1,BUB1B,C3,C4A/C4B,CALCB,CCL1,Ccl2,CCL3L3,CCL4,CCNA2,CCNB1,CCNF,CD14,CD177,CD74,CD80,CD83,CD86,CDC20,CDCA2,CDCA3,CDCA5,CDCA8,CDK1,CENPE,CHAF1B,CXCL10,CXCL2,CXCL3,CXCL6,DSCC1,E2F7,E2F8,EFNB2,EGF,ERCC6L,EXO1,FANCA,HJURP,HMOX1,IL18,IL6,KIF11,KNTC1,LCP1,MCM5,MKI67,MMP14,MRC1,MSR1,NLRP6,NUSAP1,ODC1,P2RY2,PIGR,PLET1,PLK1,PRC1,PTAFR,PTN,RACGAP1,RAD51,RRM2,S100A9,SERPINE1…	1	Extracranial solid tumor	100% (1/1)
-2.646	30	1	IFN Beta	28	AREG,C3AR1,CAV1,Ccl2,CD74,CD80,CD83,CD86,CXCL10,CXCL11,CYBB,CYP2E1,EREG,IFI16,IL1RN,IL6,KIT,MYH7,NCAPG,OLR1,SERPINE1,SLC16A6,SLC7A11,SPP1,TGFBR1,THBS1,TLR5,TNFSF10	1	Malignant genitourinary solid tumor	0% (0/1)
-2.728	86	1	dextran sulfate	84	ADORA2B,ANLN,ARG1,AURKA,BIRC5,BUB1,BUB1B,C3,C4A/C4B,CALCB,CCL1,Ccl2,CCL3L3,CCL4,CCNA2,CCNB1,CCNF,CD14,CD177,CD74,CD80,CD83,CD86,CDC20,CDCA2,CDCA3,CDCA5,CDCA8,CDK1,CENPE,CHAF1B,CXCL10,CXCL2,CXCL3,CXCL6,DSCC1,E2F7,E2F8,EFNB2,EGF,ERCC6L,EXO1,FANCA,HJURP,HMOX1,IL18,IL6,KIF11,KNTC1,LCP1,MCM5,MKI67,MMP14,MRC1,MSR1,NLRP6,NUSAP1,ODC1,P2RY2,PIGR,PLET1,PLK1,PRC1,PTAFR,PTN,RACGAP1,RAD51,RRM2,S100A9,SERPINE1…	1	Epithelial neoplasm	100% (1/1)
-2.728	86	1	dextran sulfate	84	ADORA2B,ANLN,ARG1,AURKA,BIRC5,BUB1,BUB1B,C3,C4A/C4B,CALCB,CCL1,Ccl2,CCL3L3,CCL4,CCNA2,CCNB1,CCNF,CD14,CD177,CD74,CD80,CD83,CD86,CDC20,CDCA2,CDCA3,CDCA5,CDCA8,CDK1,CENPE,CHAF1B,CXCL10,CXCL2,CXCL3,CXCL6,DSCC1,E2F7,E2F8,EFNB2,EGF,ERCC6L,EXO1,FANCA,HJURP,HMOX1,IL18,IL6,KIF11,KNTC1,LCP1,MCM5,MKI67,MMP14,MRC1,MSR1,NLRP6,NUSAP1,ODC1,P2RY2,PIGR,PLET1,PLK1,PRC1,PTAFR,PTN,RACGAP1,RAD51,RRM2,S100A9,SERPINE1…	1	Non-melanoma solid tumor	100% (1/1)
-2.831	68	1	HRAS	66	A2M,ACTA1,ADRA2A,AREG,ATP1A3,AURKA,BIRC5,C1QC,CAPG,CAV1,Ccl2,CCNA2,CCNB1,CCNE1,CD44,CDK1,CFB,CGREF1,CNN1,CTSB,CTSS,CTSZ,CXCL10,CXCL11,CXCL2,CXCL3,DUSP4,DUSP9,EREG,FABP3,FASN,FBLN2,GADD45G,GIMAP1,GRN,GSN,GUSB,HEY2,HMOX1,IFI30,IGF2,IGFBP3,IL24,IL6,LYZ,MMP12,MMP14,OSM,PCDHGA1,PLAU,PLAUR,PLK1,RRM2,SERPINA3,SERPINE1,SERPINE2,SOAT1,SPP1,SPSB4,SQLE,THBS1,TK1,TMOD2,TOP2A,TPH1,VCAN	1	Extrapancreatic malignant tumor	100% (1/1)
-2.831	68	1	RB1	66	ACTC1,ACTN2,ASF1B,ATP1A1,ATP1B1,BARD1,BIRC5,CASP6,CCL1,CCL3L3,CCNA2,CCNB1,CCNE1,CD44,CD83,CDC6,CDCA5,CDK1,CKM,CPA4,CXCL2,CXCL3,CYSLTR1,DLK1,E2F3,E2F7,F3,FABP4,FAM111A,FANCA,FXYD1,GALR3,GEM,IGF1,IL6,KDR,KIT,LRAT,MCM10,MCM5,MELK,MYBL2,MYH6,MYH7,MYL4,MYOM2,NPY,OLR1,PCLAF,PIM1,PLK1,PPARGC1A,PTTG1,PTX3,RAD51,RAMP2,RBL1,RRM2,SCTR,SERPINE1,SLC5A8,SOD2,TNNC1,TNNT2,TREM1,UBE2C	1	Nonhematologic malignant neoplasm	100% (1/1)
-3.25	18	1	IL1RN	16	CCL2,CD44,CIITA,CTSS,CXCL11,CXCL3,CYP2E1,HDAC9,IGF1,IL18BP,IL6,S100A9,SERPINE1,SLC6A4,SPP1,TNFSF10	1	Breast or pancreatic cancer	100% (1/1)
-3.277	75	1	medroxyprogesterone acetate	73	ACP5,ADCY1,ANLN,ASPM,BIRC5,BUB1,BUB1B,C9orf24,CAMK2A,CAV1,Ccl2,CCL2,CCL4,CCNA2,CCNB1,CD44,CD68,CDC20,CDC6,CDK1,CENPF,CKS2,CNTFR,CSF2RB,CTSB,CTSK,CXCL10,DEPDC1,DIAPH3,DLL4,E2F3,ESPL1,ESR1,F3,FASN,GAA,GCH1,GSN,GUSB,IGF1,IGF2,IL18,IL24,IL6,IQGAP3,ITGB2,ITGB8,KIF11,KIT,LGMN,LIPA,MCM5,MMP7,MYLK3,NCAPG,NPC1,NUSAP1,ODC1,PBK,PKMYT1,PLAU,PLK1,PRC1,PTTG1,RASGRF1,RBL1,SLC2A1,SRD5A2,THBS1,THBS2,TTK,VCAN,ZBTB…	1	Cancer of secretory structure	100% (1/1)
-3.618	13	1	ADIPOQ	11	ARG1,Ccl2,CCL2,CXCL10,FABP4,HMGCS2,IL6,NCF1,PPARGC1A,SOD2,SPI1	1	Hypersensitive reaction	100% (1/1)
-3.683	64	1	NFKBIA	62	A2M,BUB1B,C3,Ccl2,CCL2,CCL3L3,CCNA2,CCNB1,CD44,CD74,CD80,CD86,CDC6,CFTR,CH25H,CHI3L1,CP,CTSB,CTSZ,CXCL10,CXCL11,CXCL2,CXCL3,CXCL6,CYBA,EREG,ESM1,F3,FGFR4,GCH1,GRN,GZMB,HK2,HLA-DQA1,HMOX1,HOXB5,IFI16,IGF2,IL1RN,IL6,KCNN4,LCN2,LITAF,LYZ,MATK,MMP14,NDRG2,PIM1,PLAU,PLD3,PTGES,PTX3,S100A9,SERPINE2,SFTPA1,SOAT1,SOD2,TAC1,TFCP2L1,TMEM176B,TNFAIP2,TNFSF10	1	Cancer of secretory structure	100% (1/1)
-4	11	1	dorsomorphin	9	ACTA1,ARG1,BIRC5,Ccl2,IL6,KDR,NPY,PNPLA2,PPARGC1A	1	Hepatobiliary neoplasm	0% (0/1)
-4.037	86	1	dextran sulfate	84	ADORA2B,ANLN,ARG1,AURKA,BIRC5,BUB1,BUB1B,C3,C4A/C4B,CALCB,CCL1,Ccl2,CCL3L3,CCL4,CCNA2,CCNB1,CCNF,CD14,CD177,CD74,CD80,CD83,CD86,CDC20,CDCA2,CDCA3,CDCA5,CDCA8,CDK1,CENPE,CHAF1B,CXCL10,CXCL2,CXCL3,CXCL6,DSCC1,E2F7,E2F8,EFNB2,EGF,ERCC6L,EXO1,FANCA,HJURP,HMOX1,IL18,IL6,KIF11,KNTC1,LCP1,MCM5,MKI67,MMP14,MRC1,MSR1,NLRP6,NUSAP1,ODC1,P2RY2,PIGR,PLET1,PLK1,PRC1,PTAFR,PTN,RACGAP1,RAD51,RRM2,S100A9,SERPINE1…	1	Solid tumor	100% (1/1)
-4.333	11	1	genistein	9	C3,Ccl2,CCL2,CD44,CD74,CD80,CD86,CXCL10,SPP1	1	Cell movement of dendritic cells	0% (0/1)
-4.473	86	1	dextran sulfate	84	ADORA2B,ANLN,ARG1,AURKA,BIRC5,BUB1,BUB1B,C3,C4A/C4B,CALCB,CCL1,Ccl2,CCL3L3,CCL4,CCNA2,CCNB1,CCNF,CD14,CD177,CD74,CD80,CD83,CD86,CDC20,CDCA2,CDCA3,CDCA5,CDCA8,CDK1,CENPE,CHAF1B,CXCL10,CXCL2,CXCL3,CXCL6,DSCC1,E2F7,E2F8,EFNB2,EGF,ERCC6L,EXO1,FANCA,HJURP,HMOX1,IL18,IL6,KIF11,KNTC1,LCP1,MCM5,MKI67,MMP14,MRC1,MSR1,NLRP6,NUSAP1,ODC1,P2RY2,PIGR,PLET1,PLK1,PRC1,PTAFR,PTN,RACGAP1,RAD51,RRM2,S100A9,SERPINE1…	1	Malignant solid tumor	100% (1/1)
-4.596	10	1	MYOCD	8	ACTC1,CASQ2,HEY2,MYH6,MYH7,MYL2,MYL4,TNNT2	1	Cardiac contractility	0% (0/1)
-5.303	10	1	daidzein	8	ARG1,CAV1,CCL2,ESR1,FCGR2B,HMOX1,IL6,ITGB2	1	Metastatic solid tumor	0% (0/1)
-5.367	7	1	TGFBR2	5	AREG,BIRC5,CCNE1,IL6,ODC1	1	Liver Regeneration	0% (0/1)
-5.715	8	1	CIP2A	6	CFB,DSC2,GPNMB,GPR183,HK2,PLAUR	1	Organismal death	100% (1/1)
-5.783	86	1	dextran sulfate	84	ADORA2B,ANLN,ARG1,AURKA,BIRC5,BUB1,BUB1B,C3,C4A/C4B,CALCB,CCL1,Ccl2,CCL3L3,CCL4,CCNA2,CCNB1,CCNF,CD14,CD177,CD74,CD80,CD83,CD86,CDC20,CDCA2,CDCA3,CDCA5,CDCA8,CDK1,CENPE,CHAF1B,CXCL10,CXCL2,CXCL3,CXCL6,DSCC1,E2F7,E2F8,EFNB2,EGF,ERCC6L,EXO1,FANCA,HJURP,HMOX1,IL18,IL6,KIF11,KNTC1,LCP1,MCM5,MKI67,MMP14,MRC1,MSR1,NLRP6,NUSAP1,ODC1,P2RY2,PIGR,PLET1,PLK1,PRC1,PTAFR,PTN,RACGAP1,RAD51,RRM2,S100A9,SERPINE1…	1	Cancer	100% (1/1)
-6.261	7	1	OXT	5	ESR1,FASN,MYH6,MYL7,TNNI3	1	Inflammation of body cavity	0% (0/1)
-6.708	7	1	GATA5	5	ACTC1,MYH6,MYH7,SLC5A1,TNNC1	1	Cancer of cells	100% (1/1)
-7.506	5	1	RNY3	3	CXCL10,SERPING1,SIGLEC1	1	Activation of leukocytes	0% (0/1)
-8.083	5	1	HEY2	3	CNN1,IL6,MYL7	1	Development of vasculature	100% (1/1)

## Sheet: S6b Year 1
Table S6. All significant regulator effects at each time point
Table S6b. All significant regulator effects at Year 1
Consistency Score	Node Total	Regulator Total	Regulators	Target Total	Target Molecules in Dataset	Disease & Function Total	Diseases & Functions	Known Regulator-Disease/Function Relationships
4.587	25	1	E. coli B5 lipopolysaccharide	23	CCL1,CCL11,CCL17,Ccl2,CCL2,CCL22,CCL3L3,CCL4,Ccl7,CX3CL1,CXCL10,CXCL2,CXCL3,CXCL6,CYBB,IL12B,IL18,PF4,SERPINE1,SPP1,THBS1,TLR2,TREM1	1	Chemotaxis of phagocytes	0% (0/1)
4.587	25	1	E. coli B5 lipopolysaccharide	23	CCL1,CCL11,CCL17,Ccl2,CCL2,CCL22,CCL3L3,CCL4,Ccl7,CX3CL1,CXCL10,CXCL2,CXCL3,CXCL6,CYBB,IL12B,IL18,PF4,SERPINE1,SPP1,THBS1,TLR2,TREM1	1	Chemotaxis of myeloid cells	0% (0/1)
4.477	24	1	AGT	22	ADORA2B,ALOX12,BTK,C3,C4A/C4B,C5AR1,CALCB,CCL2,CCL3L3,CCL4,Ccl9,CD44,CXCL10,CXCL2,CXCL3,ESR1,FCGR1A,FCGR2B,GJA1,ITGB2,LGALS3,PTGFR	1	Mobilization of Ca2+	100% (1/1)
4.249	22	1	TLR3	20	C3,CCL1,CCL11,CCL17,Ccl2,CCL2,CCL3L3,CCL4,Ccl7,CX3CL1,CXCL10,CXCL2,CXCL3,IL12B,LCN2,PLAU,PTGES,S100A8,SERPINE1,TREM1	1	Chemotaxis of myeloid cells	0% (0/1)
4.158	30	1	MYD88	28	C3,CCL17,Ccl2,CCL2,CCL3L3,CCL4,CD44,CXCL10,CXCL13,CXCL2,CXCL3,CXCL6,HCK,HP,IGF1,IL12B,IL18,INHBA,ITGAM,MARCO,MMP14,MMP7,MMP9,PTGES,S100A8,SERPINE1,SPP1,TLR2	1	Chemotaxis	100% (1/1)
4	18	1	F2	16	Ccl2,CCL2,Ccl9,CD44,CX3CL1,CXCL10,CXCL13,CXCL3,CYBB,HMOX1,MMP9,NCF1,OSM,PLAUR,SERPINE1,THBS1	1	Cell movement of phagocytes	100% (1/1)
3.873	17	1	enterotoxin B	15	CCL11,Ccl2,CCL2,CCL22,CCL3L3,CCL4,Ccl7,Ccl9,CD80,CSF2RB,CXCL10,CXCL13,CXCL2,CXCL6,IL12B	1	Quantity of leukocytes	100% (1/1)
3.873	17	1	F2	15	Ccl2,CCL2,CD44,CX3CL1,CXCL10,CXCL3,CYBB,F3,HMOX1,MMP9,NCF1,OSM,PLAUR,SERPINE1,THBS1	1	Cell movement of myeloid cells	100% (1/1)
3.873	17	1	enterotoxin B	15	CCL11,Ccl2,CCL2,CCL22,CCL3L3,CCL4,Ccl7,Ccl9,CD80,CSF2RB,CXCL10,CXCL13,CXCL2,CXCL6,IL12B	1	Quantity of blood cells	100% (1/1)
3.801	22	1	trinitrobenzenesulfonic acid	20	CCL11,Ccl2,CCL3L3,CCL4,Ccl7,Ccl9,CD44,CSF2RA,CXCL10,CXCL2,CXCL3,CXCL6,IL12B,IL18,ITGAM,LCN2,MMP9,PF4,S100A8,S100A9	1	Chemotaxis	0% (0/1)
3.801	22	1	E. coli B5 lipopolysaccharide	20	CCL17,Ccl2,CCL2,CCL22,CCL3L3,CCL4,Ccl9,CD44,CD86,CX3CL1,CXCL10,CXCL13,CXCL3,CYBB,HMOX1,IL12B,IL18,SERPINE1,SPP1,TLR2	1	Migration of antigen presenting cells	0% (0/1)
3.801	22	1	enterotoxin B	20	CCL11,CCL17,Ccl2,CCL2,CCL22,CCL3L3,CCL4,Ccl7,Ccl9,CD80,CSF2RA,CSF2RB,CXCL10,CXCL13,CXCL2,CXCL3,CXCL6,GPNMB,IL12B,UCHL1	1	Cell movement	0% (0/1)
3.753	25	1	tetradecanoylphorbol acetate	23	C3,C3AR1,C5AR1,CAPG,CCL11,Ccl2,CCL2,CCL3L3,CCL4,CSF2RA,CXCL10,CXCL2,CXCL3,CXCL6,IL18,ITGAM,ITGB2,LCN2,PF4,PLAUR,S100A8,S100A9,SPP1	1	Chemotaxis of granulocytes	0% (0/1)
3.753	14	1	FCGR2A	12	CCL1,Ccl2,CCL2,CCL22,CCL4,CLEC4E,CXCL10,CXCL2,CXCL3,IL12B,IL18,SERPINE1	1	Leukocyte migration	100% (1/1)
3.753	14	1	FCGR2A	12	CCL1,Ccl2,CCL2,CCL22,CCL4,CLEC4E,CXCL10,CXCL2,CXCL3,IL12B,IL18,SERPINE1	1	Migration of cells	100% (1/1)
3.75	18	1	MAP2K1	16	APOE,AREG,CCL2,CCL3L3,CCL4,CD44,CTSB,CXCL3,F3,LGALS3,MMP12,MMP14,MMP9,OSM,PLAUR,THBS1	1	Cell movement of myeloid cells	0% (0/1)
3.75	18	1	EGF	16	CCL17,Ccl2,CCL2,CD44,CXCL2,CXCL6,F3,HMOX1,IGFBP3,ITGAM,MMP9,PLAU,PLAUR,S100A9,SERPINE1,SPP1	1	Migration of myeloid cells	0% (0/1)
3.75	18	1	enterotoxin B	16	CCL11,CCL17,Ccl2,CCL2,CCL22,CCL3L3,CCL4,Ccl9,CD80,CSF2RB,CXCL10,CXCL13,CXCL2,CXCL3,CXCL6,IL12B	1	Migration of phagocytes	0% (0/1)
3.75	18	1	enterotoxin B	16	CCL11,CCL17,Ccl2,CCL2,CCL22,CCL3L3,CCL4,Ccl7,Ccl9,CSF2RA,CXCL10,CXCL13,CXCL2,CXCL3,CXCL6,IL12B	1	Homing of cells	0% (0/1)
3.742	16	1	Pdgf (complex)	14	CAV1,Ccl2,CCL2,CD44,CXCL3,F3,GJA1,HMOX1,INHBA,NOG,PLAU,PLAUR,SERPINE1,TIMP1	1	Cell movement of myeloid cells	100% (1/1)
3.742	16	1	TLR9	14	CCL17,Ccl2,CCL3L3,CCL4,Ccl7,CXCL10,CXCL2,CXCL3,CXCL6,IL12B,IL18,LCN2,S100A8,SERPINE1	1	Chemotaxis of phagocytes	0% (0/1)
3.742	16	1	TLR9	14	CCL17,Ccl2,CCL3L3,CCL4,Ccl7,CXCL10,CXCL2,CXCL3,CXCL6,IL12B,IL18,LCN2,S100A8,SERPINE1	1	Chemotaxis of myeloid cells	0% (0/1)
3.742	16	1	S100A9	14	AREG,C3,CCL11,Ccl2,CXCL10,CXCL3,FCGR2A,IL1RL1,ITGAM,MMP7,MMP9,PLAU,S100A8,TNFRSF9	1	Cell movement of granulocytes	100% (1/1)
3.742	16	1	ITPR2	14	BTK,Ccl2,CCL2,CCL3L3,CCL4,Ccl7,CD44,CXCL10,CXCL13,CXCL6,ITGB2,Ly6a (includes others),NCF1,PTAFR	1	Leukocyte migration	0% (0/1)
3.742	16	1	TLR9	14	CCL17,Ccl2,CCL3L3,CCL4,Ccl7,CXCL10,CXCL2,CXCL3,CXCL6,IL12B,IL18,LCN2,S100A8,SERPINE1	1	Chemotaxis of leukocytes	0% (0/1)
3.742	16	1	TLR9	14	CCL17,Ccl2,CCL3L3,CCL4,Ccl7,CXCL10,CXCL2,CXCL3,CXCL6,IL12B,IL18,LCN2,S100A8,SERPINE1	1	Homing of blood cells	0% (0/1)
3.742	16	1	TLR9	14	CCL17,Ccl2,CCL3L3,CCL4,Ccl7,CXCL10,CXCL2,CXCL3,CXCL6,IL12B,IL18,LCN2,S100A8,SERPINE1	1	Homing of leukocytes	0% (0/1)
3.671	21	1	IL5	19	BCL3,CCL2,CCNE1,CD80,CSF2RB,CYSLTR1,EGR2,FCGR2B,GADD45G,IL1RL1,ITGAM,PIM1,SEMA4A,SLC2A1,SLC7A5,TLR1,TNFRSF4,TNFRSF9,TNFSF8	1	Leukopoiesis	100% (1/1)
3.638	19	1	cigarette smoke	17	AREG,C3,Ccl2,CCL2,CRLF2,CXCL10,CXCL2,CXCL3,HMOX1,KL,MMP12,MMP9,P2RY6,PTGES,PTPRB,SERPINE1,TIMP1	1	Cell movement of myeloid cells	100% (1/1)
3.624	24	1	TLR4	22	C3,CCL1,Ccl2,CCL2,CCL3L3,CCL4,CD14,CD200R1,CD44,CD80,CD86,CXCL10,CXCL2,CXCL3,F3,FCGR2B,IL18,ITGAM,MARCO,RGS1,SPP1,TLR2	1	Binding of leukocytes	100% (1/1)
3.618	13	1	FCGR2A	11	CCL1,Ccl2,CCL2,CCL22,CCL4,CXCL10,CXCL2,CXCL3,IL12B,IL18,SERPINE1	1	Cell movement of leukocytes	100% (1/1)
3.615	17	1	E. coli lipopolysaccharide	15	Ccl2,CCL2,CCL22,CCL4,CXCL10,CXCL2,CXCL3,CXCL6,IL12B,IL18,MMP9,S100A8,S100A9,TREM1,TREM3	1	Cell movement of myeloid cells	100% (1/1)
3.615	17	1	TICAM1	15	Ccl2,CCL2,CCL3L3,CCL4,CXCL10,CXCL11,CXCL13,CXCL2,CXCL3,CXCL6,IL12B,IL18,SERPINE1,TLR2,TREM1	1	Inflammatory response	100% (1/1)
3.615	17	1	TICAM1	15	Ccl2,CCL2,CCL3L3,CCL4,CXCL10,CXCL11,CXCL13,CXCL2,CXCL3,CXCL6,IL12B,IL18,SERPINE1,TLR2,TREM1	1	Chemotaxis	0% (0/1)
3.615	17	1	DDX58	15	BTK,C6,Ccl2,CCL2,CCL22,CCL4,CD4,CTSS,CXCL10,CXCL11,IL18,ITGAM,PLAUR,SPP1,THBS1	1	Migration of mononuclear leukocytes	100% (1/1)
3.615	17	1	enterotoxin B	15	CCL11,CCL17,Ccl2,CCL2,CCL22,CCL3L3,CCL4,Ccl7,CSF2RA,CXCL10,CXCL13,CXCL2,CXCL3,CXCL6,IL12B	1	Inflammatory response	0% (0/1)
3.615	17	1	enterotoxin B	15	CCL11,CCL17,Ccl2,CCL2,CCL22,CCL3L3,CCL4,Ccl7,Ccl9,CSF2RB,CXCL10,CXCL13,CXCL2,CXCL3,CXCL6	1	Recruitment of leukocytes	0% (0/1)
3.615	17	1	enterotoxin B	15	CCL11,CCL17,Ccl2,CCL2,CCL22,CCL3L3,CCL4,Ccl7,Ccl9,CSF2RB,CXCL10,CXCL13,CXCL2,CXCL3,CXCL6	1	Recruitment of cells	0% (0/1)
3.606	15	1	IL18	13	Ccl2,CCL2,CCL3L3,CCL4,CD44,CXCL10,CXCL3,ITGAM,MMP9,PENK,SERPINB1,SPP1,TIMP1	1	Cell movement of neutrophils	100% (1/1)
3.606	15	1	CCL5	13	AIF1,C5AR1,Ccl2,CCL2,CCL3L3,CCL4,CD44,CXCL2,CXCL3,ITGAM,MMP9,PLAUR,THBS1	1	Cell movement of phagocytes	100% (1/1)
3.606	15	1	CCL5	13	AIF1,C5AR1,Ccl2,CCL2,CCL3L3,CCL4,CD44,CXCL2,CXCL3,ITGAM,MMP9,PLAUR,THBS1	1	Cell movement of myeloid cells	100% (1/1)
3.606	15	1	E. coli lipopolysaccharide	13	Ccl2,CCL2,CCL22,CD80,CD86,CXCL10,CXCL2,CXCL3,IL12B,IL18,MMP9,S100A8,S100A9	1	Accumulation of blood cells	100% (1/1)
3.606	15	1	E. coli lipopolysaccharide	13	Ccl2,CCL2,CCL22,CD80,CD86,CXCL10,CXCL2,CXCL3,IL12B,IL18,MMP9,S100A8,S100A9	1	Accumulation of leukocytes	100% (1/1)
3.606	15	1	enterotoxin B	13	CCL11,CCL17,Ccl2,CCL2,CCL22,CCL3L3,CCL4,CD80,CSF2RB,CXCL10,CXCL13,CXCL2,CXCL3	1	Adhesion of blood cells	0% (0/1)
3.606	15	1	E. coli lipopolysaccharide	13	Ccl2,CCL2,CCL22,CD80,CD86,CXCL10,CXCL2,CXCL3,IL12B,IL18,MMP9,S100A8,S100A9	1	Accumulation of cells	100% (1/1)
3.606	15	1	enterotoxin B	13	CCL11,CCL17,Ccl2,CCL2,CCL22,CCL3L3,CCL4,CD80,CSF2RB,CXCL10,CXCL13,CXCL2,CXCL3	1	Binding of blood cells	0% (0/1)
3.536	20	1	Bay 11-7082	18	ARG1,BCL2A1,Ccl2,CCL2,CCL3L3,CCL4,Ccl7,CD83,CXCL2,CXCL3,F3,GJA1,HMOX1,IL18,MMP9,PIM1,SOD2,TLR2	1	Cellular homeostasis	0% (0/1)
3.536	20	1	Ige	18	C3,CCL17,Ccl2,CCL2,CCL22,CCL3L3,CCL4,Ccl9,CD74,CD80,CD86,CX3CL1,CXCL3,HMOX1,IL12B,SPP1,TLR2,TNFRSF9	1	Migration of antigen presenting cells	100% (1/1)
3.53	28	1	NFkB (complex)	26	A2M,ADORA2B,AGT,C3,CCL1,CCL11,CCL17,CCL2,CCL22,CCL3L3,CCL4,CD44,CX3CL1,CXCL10,CXCL11,CXCL2,CXCL3,CXCL6,FCER2,FCGR1A,P2RY2,PLAUR,PTAFR,SFTPA1,TLR2,TRH	1	Mobilization of Ca2+	0% (0/1)
3.5	18	1	E. coli B5 lipopolysaccharide	16	CCL1,CCL11,Ccl2,CCL2,CCL22,CCL3L3,CCL4,CX3CL1,CXCL10,CYBB,IL12B,PF4,SPP1,THBS1,TLR2,TREM1	1	Chemotaxis of antigen presenting cells	0% (0/1)
3.479	12	1	SERPINE2	10	CCL17,Ccl2,CCL22,CCL4,Ccl9,CXCL10,CXCL13,CXCL3,ITGB2,MMP9	1	Lymphocyte migration	100% (1/1)
3.479	12	1	SERPINE2	10	CCL17,Ccl2,CCL22,CCL4,Ccl9,CXCL10,CXCL13,CXCL3,ITGB2,MMP9	1	Migration of lymphatic system cells	100% (1/1)
3.479	12	1	SERPINE2	10	CCL17,Ccl2,CCL22,CCL4,Ccl9,CXCL10,CXCL13,CXCL3,ITGB2,MMP9	1	Migration of mononuclear leukocytes	100% (1/1)
3.479	12	1	SERPINE2	10	CCL17,Ccl2,CCL22,CCL4,Ccl9,CXCL10,CXCL13,CXCL3,ITGB2,MMP9	1	Cell movement of lymphatic system cells	100% (1/1)
3.479	12	1	FCGR2A	10	CCL1,Ccl2,CCL2,CCL22,CCL4,CLEC4E,CXCL10,CXCL3,IL12B,IL18	1	Activation of leukocytes	100% (1/1)
3.479	12	1	FCGR2A	10	CCL1,Ccl2,CCL2,CCL22,CCL4,CLEC4E,CXCL10,CXCL3,IL12B,IL18	1	Activation of blood cells	100% (1/1)
3.479	12	1	SERPINE2	10	CCL17,Ccl2,CCL22,CCL4,Ccl9,CXCL10,CXCL13,CXCL3,ITGB2,MMP9	1	Cell movement of mononuclear leukocytes	100% (1/1)
3.479	12	1	FCGR2A	10	Ccl2,CCL2,CCL22,CCL4,CLEC4E,CXCL10,CXCL2,CXCL3,IL18,SERPINE1	1	Recruitment of myeloid cells	100% (1/1)
3.479	12	1	SERPINE2	10	CCL17,Ccl2,CCL22,CCL4,Ccl9,CXCL10,CXCL13,CXCL3,ITGB2,MMP9	1	Cell movement of lymphocytes	100% (1/1)
3.479	12	1	FCGR2A	10	Ccl2,CCL2,CCL22,CCL4,CLEC4E,CXCL10,CXCL2,CXCL3,IL18,SERPINE1	1	Recruitment of phagocytes	100% (1/1)
3.474	16	1	peptidoglycan	14	Ccl2,CCL2,CCL3L3,CCL4,CD80,CD86,CXCL10,CXCL2,CXCL3,IL18,ITGB2,S100A8,S100A9,TLR2	1	Adhesion of immune cells	0% (0/1)
3.474	16	1	peptidoglycan	14	Ccl2,CCL2,CCL3L3,CCL4,CD80,CD86,CXCL10,CXCL2,CXCL3,IL18,ITGB2,S100A8,S100A9,TLR2	1	Adhesion of blood cells	0% (0/1)
3.474	16	1	N-acetylmuramyl-L-alanyl-D-isoglutamine	14	CCL17,Ccl2,CCL2,CCL4,Ccl7,CXCL11,CXCL2,CXCL3,CXCL6,IL12B,ITGB2,MMP9,MSR1,TREM1	1	Inflammatory response	100% (1/1)
3.474	16	1	N-acetylmuramyl-L-alanyl-D-isoglutamine	14	CARD9,CCL17,Ccl2,CCL2,CCL4,CD80,CD86,CXCL3,CXCL6,IL12B,ITGB2,MMP9,MSR1,TREM1	1	Activation of blood cells	100% (1/1)
3.474	16	1	salmonella minnesota R595 lipopolysaccharides	14	Ccl2,CCL2,CCL22,CCL3L3,CCL4,Ccl7,CXCL10,CXCL13,CXCL2,CXCL3,CXCL6,IL12B,SERPINE1,TLR2	1	Inflammatory response	100% (1/1)
3.474	16	1	salmonella minnesota R595 lipopolysaccharides	14	Ccl2,CCL2,CCL22,CCL3L3,CCL4,Ccl7,CXCL10,CXCL13,CXCL2,CXCL3,CXCL6,IL12B,SERPINE1,TLR2	1	Chemotaxis	0% (0/1)
3.474	16	1	CFI-402257	14	AREG,CCL2,CXCL2,CXCL3,EREG,GEM,IGF1,INHBA,MMP12,MMP14,PLAU,PLAUR,PTGES,S100A9	1	Cell movement	0% (0/1)
3.474	16	1	enterotoxin B	14	CCL11,CCL17,Ccl2,CCL2,CCL22,CCL3L3,CCL4,Ccl9,CD80,CSF2RB,CXCL10,CXCL13,CXCL3,IL12B	1	Cell movement of antigen presenting cells	0% (0/1)
3.464	14	1	Ccl2	12	CCL11,CCL3L3,CCL4,Ccl7,Ccl9,CTSB,CTSK,CXCL10,CXCL2,CYBB,IGF1,SPP1	1	Quantity of leukocytes	100% (1/1)
3.464	14	1	lysophosphatidylcholine	12	Ccl2,CCL2,CCL3L3,CD74,CYBB,GJA1,IRF5,PLAU,PLAUR,REG3A,SERPINE1,TNFRSF9	1	Cell movement of phagocytes	100% (1/1)
3.464	14	1	hydrogen peroxide	12	Ccl2,CCL2,CCL3L3,CCL4,CTSS,CXCL3,CXCL6,HMOX1,MMP9,PLAUR,SERPINE1,SPP1	1	Migration of myeloid cells	0% (0/1)
3.464	14	1	FCGR2A	12	CCL1,Ccl2,CCL2,CCL22,CCL4,CLEC4E,CXCL10,CXCL2,CXCL3,IL12B,IL18,SERPINE1	1	Activation of cells	100% (1/1)
3.441	21	1	SB203580	19	AGT,C3,C3AR1,C4A/C4B,CCL11,CCL17,CCL2,CCL4,CX3CL1,CXCL10,CXCL11,CXCL2,CXCL3,FCER2,GJA1,PLAUR,TLR2,TREM1,TRPA1	1	Mobilization of Ca2+	100% (1/1)
3.395	19	1	SP600125	17	APOE,Ccl2,CCL2,CCL4,CXCL10,CXCL2,CXCL3,CXCL6,IL12B,IL18,INHBA,MMP9,PTGES,SERPINE1,SPP1,THBS1,THBS2	1	Chemotaxis of leukocytes	0% (0/1)
3.357	17	1	CSF2	15	C3,CCL17,Ccl2,CCL2,CCL3L3,CCL4,CXCL10,CXCL2,IL12B,IL1RL1,OSM,PLAUR,SPI1,TNFRSF9,TNFSF8	1	Cell movement of eosinophils	100% (1/1)
3.357	17	1	poly rI:rC-RNA	15	C3,CD14,CD44,CX3CL1,CXCL10,FCGR1A,FCGR2B,ITGAM,MARCO,MSR1,PLAU,PLAUR,SFTPD,THBS1,TLR2	1	Phagocytosis of leukocytes	100% (1/1)
3.357	17	1	Tnf (family)	15	C3AR1,CCL1,Ccl2,CCL2,CCL4,CD4,CD72,CX3CL1,CXCL10,CXCL3,IL12B,INHBA,LCN2,SERPINE1,TLR2	1	Chemotaxis of myeloid cells	0% (0/1)
3.357	17	1	MAPKAPK2	15	ARG1,CCL11,Ccl2,CCL2,CCL3L3,Ccl7,CXCL10,CXCL2,CXCL3,IL18,MARCO,MMP9,MSR1,PLAU,Retnla	1	Cell movement	100% (1/1)
3.354	22	1	Pam3-Cys-Ser-Lys4	20	CCL17,Ccl2,CCL2,CCL3L3,CCL4,CD14,CX3CL1,CXCL10,CXCL2,CXCL3,CXCL6,F3,FCGR2A,IL12B,IL18,MMP9,OSM,SERPINE1,SPI1,TLR2	1	Cell movement of granulocytes	100% (1/1)
3.333	11	1	PLAU	9	Ccl2,CCL2,CXCL3,F3,MMP9,PLAUR,S100A8,S100A9,SERPINE1	1	Migration of myeloid cells	100% (1/1)
3.333	11	1	FCGR2A	9	CCL1,Ccl2,CCL2,CCL22,CCL4,CLEC4E,CXCL10,CXCL3,IL18	1	Activation of myeloid cells	100% (1/1)
3.328	15	1	TRAF3IP2	13	AGT,CCL11,Ccl2,Ccl7,CX3CL1,CXCL10,CXCL2,CXCL3,CXCL6,IL18,LCN2,MMP9,S100A8	1	Inflammatory response	100% (1/1)
3.328	15	1	TRAF3IP2	13	AGT,CCL11,Ccl2,Ccl7,CX3CL1,CXCL10,CXCL2,CXCL3,CXCL6,IL18,LCN2,MMP9,S100A8	1	Cell movement of myeloid cells	100% (1/1)
3.328	15	1	TRAF3IP2	13	AGT,CCL11,Ccl2,Ccl7,CX3CL1,CXCL10,CXCL2,CXCL3,CXCL6,IL18,LCN2,MMP9,S100A8	1	Cell movement of phagocytes	100% (1/1)
3.328	15	1	aldosterone	13	AGT,Ccl2,CCL2,CYBB,FABP4,KL,LCN2,LGALS3,NCF1,PLAUR,SERPINE1,SPP1,TIMP1	1	Cell movement of myeloid cells	100% (1/1)
3.328	15	1	lipid A	13	C3,Ccl2,CCL2,CD14,CD86,CXCL10,CXCL3,FCGR1A,FCGR2B,IL12B,MARCO,MSR1,THBS1	1	Immune response of cells	0% (0/1)
3.328	15	1	diphenyleneiodonium	13	AGT,Ccl2,CCL2,CXCL2,CXCL3,F3,HMOX1,IL18,MMP12,MMP9,SERPINE1,THBS2,TIMP1	1	Cell movement of myeloid cells	0% (0/1)
3.328	15	1	palmitic acid	13	Ccl2,CCL2,CCL3L3,CCL4,CXCL10,CXCL2,CXCL3,CYBB,IL12B,INHBA,LCN2,SERPINE1,TLR2	1	Chemotaxis of phagocytes	0% (0/1)
3.328	15	1	palmitic acid	13	Ccl2,CCL2,CCL3L3,CCL4,CXCL10,CXCL2,CXCL3,CYBB,IL12B,INHBA,LCN2,SERPINE1,TLR2	1	Chemotaxis of myeloid cells	0% (0/1)
3.328	15	1	TLR2	13	Ccl2,CCL2,CCL3L3,CCL4,CSF2RA,CXCL10,CXCL2,CXCL3,CXCL6,CYBB,IL12B,IL18,TREM1	1	Chemotaxis of phagocytes	100% (1/1)
3.328	15	1	TLR2	13	Ccl2,CCL2,CCL3L3,CCL4,CSF2RA,CXCL10,CXCL2,CXCL3,CXCL6,CYBB,IL12B,IL18,TREM1	1	Chemotaxis of myeloid cells	100% (1/1)
3.328	15	1	TGM2	13	C3,CCL2,CCL22,CD74,CD86,CXCL10,DCSTAMP,ITGAM,ITGAX,S100A8,SPP1,THBS1,TYROBP	1	Binding of leukocytes	100% (1/1)
3.328	15	1	TGM2	13	C3,CCL2,CCL22,CD74,CD86,CXCL10,DCSTAMP,ITGAM,ITGAX,S100A8,SPP1,THBS1,TYROBP	1	Adhesion of blood cells	100% (1/1)
3.328	15	1	pyrrolidine dithiocarbamate	13	Ccl2,CCL2,CCL4,CD80,CFTR,CX3CL1,CXCL10,CXCL3,CXCL6,HMOX1,IGF1,MMP9,TLR2	1	Activation of phagocytes	0% (0/1)
3.328	15	1	pyrrolidine dithiocarbamate	13	Ccl2,CCL2,CCL4,CD80,CFTR,CX3CL1,CXCL10,CXCL3,CXCL6,HMOX1,IGF1,MMP9,TLR2	1	Activation of myeloid cells	0% (0/1)
3.328	15	1	E. coli B5 lipopolysaccharide	13	CCL1,CCL11,CCL17,CCL2,CCL22,CCL3L3,CCL4,CX3CL1,CXCL10,CXCL13,CXCL3,CYBB,SPP1	1	Quantity of metal ion	0% (0/1)
3.328	15	1	cigarette smoke	13	AREG,C3,Ccl2,CCL2,CXCL10,CXCL3,HMOX1,KL,MMP12,MMP9,P2RY6,PTGES,SERPINE1	1	Cell movement of macrophages	100% (1/1)
3.317	13	1	MAVS	11	BTK,C6,Ccl2,CCL22,CXCL10,CXCL11,IL12B,IL18,PLAUR,SPP1,THBS1	1	Cell movement of mononuclear leukocytes	100% (1/1)
3.317	13	1	IFIH1	11	CCL11,Ccl2,CCL2,CCL4,CD4,CXCL10,CXCL2,CXCL3,IL12B,Ly6a (includes others),PHLDA1	1	Migration of cells	100% (1/1)
3.317	13	1	TLR7	11	Ccl2,CCL2,CCL4,Ccl7,CD44,CXCL10,CXCL13,CXCL2,CXCL3,IL12B,PLAU	1	Homing of leukocytes	0% (0/1)
3.317	13	1	N-ethyl-N-nitrosourea	11	CCL1,CCL11,CCL17,CCL2,CX3CL1,CXCL2,CXCL6,PF4,SPP1,TIMP1,TNFSF8	1	Cell movement of myeloid cells	0% (0/1)
3.317	13	1	Go 6976	11	Ccl2,CCL4,CXCL10,CXCL2,CXCL3,CXCL6,CYBB,HMOX1,IL12B,MMP9,TNFRSF9	1	Cell movement of myeloid cells	0% (0/1)
3.317	13	1	Go 6976	11	Ccl2,CCL4,CXCL10,CXCL2,CXCL3,CXCL6,CYBB,HMOX1,IL12B,MMP9,TNFRSF9	1	Migration of phagocytes	0% (0/1)
3.317	13	1	immethridine	11	BTK,C3,C5AR1,Ccl2,CD14,CD44,CTSS,CXCL3,FCGR1A,LCN2,SIGLEC1	1	Immune response of cells	0% (0/1)
3.317	13	1	PRKD1	11	CCL11,Ccl2,CCL3L3,CCL4,CXCL10,CXCL2,CXCL3,CXCL6,IL12B,MMP9,PPARGC1A	1	Inflammatory response	0% (0/1)
3.317	13	1	PRKD1	11	CCL11,Ccl2,CCL3L3,CCL4,CXCL10,CXCL2,CXCL3,CXCL6,F3,IL12B,MMP9	1	Cell movement of granulocytes	0% (0/1)
3.317	13	1	DDX58	11	C6,Ccl2,CCL2,CCL22,CCL4,CD4,CTSS,CXCL10,CXCL11,SPP1,THBS1	1	T cell migration	0% (0/1)
3.317	13	1	trinitrobenzenesulfonic acid	11	CCL11,CCL4,CD44,CLEC4E,CXCL2,IL18,IL1R2,ITGAM,LCN2,NCF4,S100A8	1	Synthesis of reactive oxygen species	0% (0/1)
3.317	13	1	aldosterone	11	AGT,Ccl2,CCL2,CYBB,FABP4,KL,LCN2,LGALS3,NCF1,SPP1,TIMP1	1	Cellular infiltration by phagocytes	100% (1/1)
3.317	13	1	aldosterone	11	AGT,Ccl2,CCL2,CYBB,FABP4,KL,LCN2,LGALS3,NCF1,SPP1,TIMP1	1	Cellular infiltration by myeloid cells	100% (1/1)
3.3	20	1	PPARG	18	APOE,C3,CCL1,CCL11,CCL17,Ccl2,CCL2,CCL22,CXCL2,CXCL3,CXCL6,HCAR2,HP,PF4,PTGES,S100A8,SERPINE1,SPP1	1	Chemotaxis of phagocytes	0% (0/1)
3.3	20	1	PPARG	18	APOE,C3,CCL1,CCL11,CCL17,Ccl2,CCL2,CCL22,CXCL2,CXCL3,CXCL6,HCAR2,HP,PF4,PTGES,S100A8,SERPINE1,SPP1	1	Chemotaxis of myeloid cells	100% (1/1)
3.3	20	1	poly rI:rC-RNA	18	C3,Ccl2,CD14,CD44,CX3CL1,CXCL10,FCGR1A,FCGR2B,ITGAM,MARCO,MSR1,P2RY6,PLAU,PLAUR,SFTPD,THBS1,TLR1,TLR2	1	Phagocytosis	100% (1/1)
3.25	18	1	TNFSF12	16	CCL11,Ccl2,CCL2,CCL3L3,Ccl7,Ccl9,CSF2RA,CXCL10,CXCL2,CXCL3,CXCL6,ITGAM,MMP9,PF4,S100A8,S100A9	1	Chemotaxis	0% (0/1)
3.25	18	1	PI3K (complex)	16	Ccl2,CCL2,CCL4,CD44,CD86,CXCL10,CYBB,FABP5,GJA1,IGF1,ITGAM,ITGB2,MMP14,MMP9,SERPINE1,SPP1	1	Transmigration of cells	0% (0/1)
3.25	18	1	cytokine	16	C5AR1,CCL2,CCL22,CD4,CX3CL1,CXCL3,F3,HMOX1,IL24,MMP12,MMP9,PLAU,PLAUR,SERPINE1,TIMP1,TLR2	1	Cell movement of myeloid cells	0% (0/1)
3.25	18	1	bleomycin	16	ATF3,CCL2,CHI3L1,CTSD,CXCL3,IGF1,IL18,LGALS3,MMP14,MMP9,PTGER2,Retnla,SERPINE1,SPP1,TIMP1,UBE2C	1	Growth of connective tissue	100% (1/1)
3.25	18	1	poly rI:rC-RNA	16	C3,CD14,CD44,CX3CL1,CXCL10,FCGR1A,FCGR2B,IL12B,ITGAM,MARCO,MSR1,PLAU,PLAUR,SFTPD,THBS1,TLR2	1	Engulfment of leukocytes	100% (1/1)
3.25	18	1	poly rI:rC-RNA	16	C3,CD14,CD44,CX3CL1,CXCL10,FCGR1A,FCGR2B,IL12B,ITGAM,MARCO,MSR1,PLAU,PLAUR,SFTPD,THBS1,TLR2	1	Engulfment of phagocytes	100% (1/1)
3.25	18	1	poly rI:rC-RNA	16	C3,CD14,CD44,CX3CL1,CXCL10,FCGR1A,FCGR2B,IL12B,ITGAM,MARCO,MSR1,PLAU,PLAUR,SFTPD,THBS1,TLR2	1	Engulfment of blood cells	100% (1/1)
3.25	18	1	poly rI:rC-RNA	16	C3,CD14,CD44,CX3CL1,CXCL10,FCGR1A,FCGR2B,IL12B,ITGAM,MARCO,MSR1,PLAU,PLAUR,SFTPD,THBS1,TLR2	1	Engulfment of myeloid cells	100% (1/1)
3.207	16	1	C3	14	APOE,C3AR1,C5AR1,Ccl2,CCL2,CCL3L3,CCL4,Ccl9,CXCL10,CXCL2,CXCL3,IL12B,ITGAM,LCN2	1	Chemotaxis	100% (1/1)
3.207	16	1	IL33	14	AREG,CCL11,CCL17,Ccl2,CCL2,CCL3L3,CCL4,CXCL10,CXCL2,HCK,IL1RL1,LGALS1,SPI1,TNFRSF9	1	Cell movement of eosinophils	100% (1/1)
3.207	16	1	EGR1	14	CAV1,Ccl2,CCL2,CCL3L3,CCL4,CD44,CXCL2,CXCL3,F3,ITGAM,MMP14,MMP9,SERPINE1,SPP1	1	Transmigration of cells	0% (0/1)
3.207	16	1	E. coli B5 lipopolysaccharide	14	CCL1,CCL11,CCL17,CCL2,CCL22,CCL3L3,CCL4,CX3CL1,CXCL10,CXCL13,CXCL3,CYBB,HMOX1,SPP1	1	Quantity of metal	100% (1/1)
3.207	16	1	poly rI:rC-RNA	14	C3,CD14,CD44,CX3CL1,CXCL10,FCGR1A,FCGR2B,ITGAM,MARCO,PLAU,PLAUR,SFTPD,THBS1,TLR2	1	Phagocytosis of myeloid cells	100% (1/1)
3.207	16	1	poly rI:rC-RNA	14	C3,CD14,CD44,CX3CL1,CXCL10,FCGR1A,FCGR2B,ITGAM,MARCO,PLAU,PLAUR,SFTPD,THBS1,TLR2	1	Phagocytosis of phagocytes	100% (1/1)
3.207	16	1	PI3K (complex)	14	Ccl2,CCL2,CCL4,CD44,CD86,CXCL10,CYBB,FABP5,GJA1,ITGAM,ITGB2,MMP14,MMP9,SERPINE1	1	Transmigration of blood cells	0% (0/1)
3.182	10	1	LGALS3	8	Ccl2,CCL2,CCL3L3,CXCL2,CXCL3,ITGAM,MSR1,SPP1	1	Adhesion of immune cells	100% (1/1)
3.182	10	1	LGALS3	8	Ccl2,CCL2,CCL3L3,CXCL2,CXCL3,ITGAM,MSR1,SPP1	1	Adhesion of blood cells	100% (1/1)
3.182	10	1	CLEC4E	8	AREG,Ccl2,CCL3L3,CCL4,CLEC5A,CXCL2,CXCL3,IL12B	1	Cellular infiltration by blood cells	100% (1/1)
3.182	10	1	PLAU	8	C5AR1,Ccl2,CCL2,CXCL3,F3,MMP9,S100A8,S100A9	1	Accumulation of myeloid cells	100% (1/1)
3.182	10	1	CLEC4E	8	AREG,Ccl2,CCL3L3,CCL4,CLEC5A,CXCL2,CXCL3,IL12B	1	Cellular infiltration	100% (1/1)
3.182	10	1	PLAU	8	C5AR1,Ccl2,CCL2,CXCL3,F3,MMP9,S100A8,S100A9	1	Accumulation of phagocytes	100% (1/1)
3.175	14	1	PDGF BB	12	C3,Ccl2,CCL2,CD44,CXCL2,F3,HMOX1,LGALS3,MMP14,MMP9,PLAU,SERPINE1	1	Migration of myeloid cells	0% (0/1)
3.175	14	1	lysophosphatidic acid	12	Ccl2,CCL2,CCL4,CD14,CXCL10,CXCL2,CXCL3,F3,ITGAM,MMP9,MPZ,SERPINE1	1	Recruitment of phagocytes	100% (1/1)
3.175	14	1	uric acid	12	AGT,AREG,Ccl2,CCL2,CCL3L3,CCL4,CXCL2,CXCL3,HMOX1,IL12B,IL18,TREM1	1	Cell movement of myeloid cells	100% (1/1)
3.175	14	1	IL17RA	12	CCL11,Ccl2,CCL28,CXCL2,CXCL3,CXCL6,MMP12,MMP9,REG3A,S100A8,S100A9,TIMP1	1	Cell movement of myeloid cells	100% (1/1)
3.175	14	1	cuprizone	12	CAPG,Ccl2,CCL3L3,CCL4,Ccl7,CTSB,CTSZ,CXCL10,GSN,LGALS1,LGALS3,LGMN	1	Cell movement of phagocytes	0% (0/1)
3.175	14	1	INSIG1	12	APOE,CCL17,CCL22,CXCL10,CXCL13,CXCL3,CXCL6,DLK1,FABP5,IL12B,PLA2G7,PTGES	1	Cell movement of mononuclear leukocytes	0% (0/1)
3.175	14	1	Srgn	12	CMA1,CXCL13,IL12B,ITGAM,ITGAX,LYZ,Mcpt4,MMP9,S100A9,THBS1,TPSAB1/TPSB2,TREM1	1	Migration of cells	0% (0/1)
3.175	14	1	CD44	12	Ccl2,CCL4,CX3CL1,ITGAX,LGALS1,LGALS3,Ly6a (includes others),PLAU,SPP1,THBS1,THBS2,THY1	1	Adhesion of immune cells	100% (1/1)
3.175	14	1	CD44	12	Ccl2,CCL4,CX3CL1,ITGAX,LGALS1,LGALS3,Ly6a (includes others),PLAU,SPP1,THBS1,THBS2,THY1	1	Adhesion of blood cells	100% (1/1)
3.175	14	1	E. coli B5 lipopolysaccharide	12	CCL1,CCL11,CCL17,CCL2,CCL22,CCL3L3,CCL4,CX3CL1,CXCL10,CXCL13,CXCL3,SPP1	1	Quantity of Ca2+	0% (0/1)
3.162	12	1	5-O-mycolyl-beta-araf-(1->2)-5-O-mycolyl-alpha-araf-(1->1')-glycerol	10	AQP9,CCL2,CCL3L3,CCL4,CD44,CXCL10,CXCL2,CXCL3,FABP4,MMP9	1	Cell movement of neutrophils	0% (0/1)
3.162	12	1	phytohemagglutinin	10	AGT,CCL2,CCL4,CD44,CXCL10,LBP,MMP12,MMP9,SPP1,TIMP1	1	Cell movement of neutrophils	0% (0/1)
3.162	12	1	hemozoin	10	Ccl2,CCL2,CCL3L3,CCL4,CXCL2,CXCL3,HMOX1,MMP9,S100A8,S100A9	1	Migration of myeloid cells	0% (0/1)
3.162	12	1	hemozoin	10	Ccl2,CCL2,CCL3L3,CD80,CXCL2,CXCL3,HMOX1,MMP9,S100A8,S100A9	1	Accumulation of cells	0% (0/1)
3.162	12	1	Salmonella enterica serotype abortus equi lipopolysaccharide	10	Ccl2,CCL3L3,CCL4,CXCL2,CXCL3,IL12B,IL18,INHBA,PLAU,THBS1	1	Chemotaxis of phagocytes	0% (0/1)
3.162	12	1	Salmonella enterica serotype abortus equi lipopolysaccharide	10	Ccl2,CCL3L3,CCL4,CXCL2,CXCL3,IL12B,IL18,INHBA,PLAU,THBS1	1	Chemotaxis of myeloid cells	0% (0/1)
3.162	12	1	estriol	10	CCL1,Ccl2,CCL2,CCL3L3,CCL4,Ccl7,CXCL10,CXCL3,CXCL6,ITGB2	1	Cell movement of lymphatic system cells	100% (1/1)
3.162	12	1	ozone	10	CCL11,Ccl2,CCL3L3,Ccl7,CXCL10,CXCL2,CXCL3,HMOX1,MMP12,SPP1	1	Cell movement of phagocytes	100% (1/1)
3.162	12	1	SAA1	10	CCL11,CCL17,Ccl2,CCL3L3,CCL4,CXCL10,CXCL6,IL12B,MMP9,Retnla	1	Migration of lymphatic system cells	100% (1/1)
3.162	12	1	SAA1	10	CCL11,CCL17,Ccl2,CCL3L3,CCL4,CXCL10,CXCL6,IL12B,S100A8,S100A9	1	Chemotaxis of phagocytes	100% (1/1)
3.162	12	1	SAA1	10	CCL11,CCL17,Ccl2,CCL3L3,CCL4,CXCL10,CXCL6,IL12B,S100A8,S100A9	1	Chemotaxis of myeloid cells	100% (1/1)
3.162	12	1	BSG	10	CCL3L3,CIP2A,CXCL3,CXCL6,IL18,MMP9,PLAU,PLAUR,PLK1,SERPINE1	1	Cell movement	100% (1/1)
3.162	12	1	PRL	10	AREG,CAV1,Ccl2,CCL2,CTSB,CXCL10,CXCL2,CXCL3,SPP1,TIMP1	1	Cellular infiltration by myeloid cells	0% (0/1)
3.162	12	1	PRL	10	AREG,CAV1,Ccl2,CCL2,CTSB,CXCL10,CXCL2,CXCL3,SPP1,TIMP1	1	Cellular infiltration by phagocytes	0% (0/1)
3.153	19	1	cholesterol	17	APOE,AQP9,CCL1,Ccl2,CCL2,CCL4,Ccl7,CXCL10,CXCL2,CXCL3,CYBB,IL12B,INHBA,ITGAM,LGALS3,S100A8,THBS1	1	Chemotaxis of phagocytes	0% (0/1)
3.153	19	1	cholesterol	17	APOE,AQP9,CCL1,Ccl2,CCL2,CCL4,Ccl7,CXCL10,CXCL2,CXCL3,CYBB,IL12B,INHBA,ITGAM,LGALS3,S100A8,THBS1	1	Chemotaxis of myeloid cells	0% (0/1)
3.153	19	1	ZFP36	17	CCL3L3,CTSS,CXCL2,CXCL3,CYBB,IL12B,KIF14,LCN2,OSM,PBK,PIM1,PLAU,PLAUR,PRC1,S100A8,S100A9,SPP1	1	Migration of cells	0% (0/1)
3.098	17	1	IL1	15	APOE,C3,CCL1,Ccl2,CCL2,CCL4,CXCL10,CXCL11,CXCL3,ITGAM,ITGB2,MMP9,TIMP1,TLR2,TNFRSF4	1	Migration of mononuclear leukocytes	0% (0/1)
3.098	17	1	STING1	15	CCL2,CCL22,CCL3L3,CCL4,CXCL10,CXCL11,CXCL2,CXCL3,IL18,INHBA,ITGAM,LCN2,PLAUR,S100A9,THBS1	1	Chemotaxis of leukocytes	0% (0/1)
3.098	17	1	STING1	15	CCL2,CCL22,CCL3L3,CCL4,CXCL10,CXCL11,CXCL2,CXCL3,IL18,INHBA,ITGAM,LCN2,PLAUR,S100A9,THBS1	1	Homing of leukocytes	0% (0/1)
3.051	15	1	CCN1	13	C3,Ccl2,CCL2,CCL3L3,CCL4,Ccl7,CXCL10,CXCL2,CXCL3,IL12B,IL18,PLAU,SERPINE1	1	Chemotaxis of phagocytes	0% (0/1)
3.051	15	1	CCN1	13	C3,Ccl2,CCL2,CCL3L3,CCL4,Ccl7,CXCL10,CXCL2,CXCL3,IL12B,IL18,PLAU,SERPINE1	1	Chemotaxis of myeloid cells	0% (0/1)
3.051	15	1	ITGB1	13	APOE,Ccl2,CCL2,CCL3L3,CCL4,CXCL10,IL12B,IL1RN,ITGAM,MMP9,PLAU,PLAUR,SERPINE1	1	Migration of phagocytes	100% (1/1)
3.051	15	1	TERT	13	CCL11,CCL17,CCL2,CX3CL1,CXCL10,CXCL2,CXCL6,GSN,MMP9,PF4,SPP1,TIMP1,TNFSF8	1	Cell movement of granulocytes	0% (0/1)
3.051	15	1	E. coli B5 lipopolysaccharide	13	Ccl2,CCL2,CCL3L3,CCL4,CX3CL1,CXCL10,CYBB,IL12B,PF4,SPP1,THBS1,TLR2,TREM1	1	Chemotaxis of macrophages	0% (0/1)
3.051	15	1	enterotoxin B	13	CCL11,CCL17,Ccl2,CCL2,CCL22,CCL3L3,CCL4,Ccl9,CD80,CSF2RB,CXCL10,CXCL13,IL12B	1	Cell movement of dendritic cells	0% (0/1)
3.024	9	1	SERPINE2	7	Ccl2,CCL22,CCL4,CXCL10,CXCL3,ITGB2,MMP9	1	Cellular infiltration by leukocytes	100% (1/1)
3.024	9	1	Ccl2	7	Ccl9,CTSB,CXCL2,CXCL3,CYBB,IGF1,SPP1	1	Advanced malignant tumor	100% (1/1)
3.024	9	1	Ccl2	7	Ccl9,CTSB,CXCL2,CXCL3,CYBB,IGF1,SPP1	1	Metastasis	100% (1/1)
3.015	13	1	F2R	11	Ccl2,CCL2,CD44,CXCL3,F3,GJA1,HMOX1,MMP9,PLAU,PLAUR,THBS1	1	Cell movement of myeloid cells	100% (1/1)
3.015	13	1	Tlr	11	ARG1,Ccl2,CCL2,CCL4,CD80,CD86,CXCL10,CXCL3,LCN2,TNFSF13,TREM1	1	Activation of myeloid cells	100% (1/1)
3.015	13	1	concanavalin a	11	CCL1,CCL11,Ccl2,CCL4,CD86,CXCL10,IL18,IL1RN,ITGB2,MMP9,SPP1	1	Activation of myeloid cells	0% (0/1)
3.015	13	1	adavosertib	11	BTK,C6,CCL22,CTSS,CXCL10,CXCL11,IL18,IRF5,ITGAM,PLAUR,THBS1	1	Migration of mononuclear leukocytes	0% (0/1)
3.015	13	1	TRAF6	11	CCL17,Ccl2,CCL2,CD80,CXCL13,CXCL2,CXCL3,CYBB,IL12B,IRF5,NCF1	1	Cell movement of phagocytes	100% (1/1)
3.015	13	1	valsartan	11	AGT,Ccl2,CTSS,CYBB,F3,FABP4,GJA1,NCF1,SERPINE1,SPP1,TIMP1	1	Cell movement of myeloid cells	100% (1/1)
3.015	13	1	TBK1	11	CCL3L3,CCL4,CXCL10,CXCL11,CXCL2,CXCL3,IL12B,IL18,INHBA,MARCO,TLR2	1	Chemotaxis	0% (0/1)
3.015	13	1	ITGAV	11	Ccl2,CCL3L3,CCL4,CD14,CXCL10,ITGAM,MMP9,OSM,PLAU,SERPINE1,TIMP1	1	Cell movement of neutrophils	0% (0/1)
3.015	13	1	ERBB2	11	CCL11,CCL2,CCL4,CXCL10,CXCL3,ESR1,GJA1,LGALS1,LGALS3,PLAUR,TREM1	1	Mobilization of Ca2+	0% (0/1)
3.015	13	1	SCD	11	Ccl2,CCL3L3,CD44,CXCL10,CXCL3,IL18,S100A8,S100A9,SPP1,THBS1,TNFRSF9	1	Binding of leukocytes	0% (0/1)
3.015	13	1	SCD	11	Ccl2,CCL3L3,CD44,CXCL10,CXCL3,IL18,S100A8,S100A9,SPP1,THBS1,TNFRSF9	1	Adhesion of blood cells	0% (0/1)
3.015	13	1	CSF3	11	C3AR1,CAPG,CD14,CD44,FCGR1A,HMOX1,ITGAM,ITGB2,LCN2,SPI1,TLR2	1	Phagocytosis of phagocytes	100% (1/1)
3.015	13	1	CSF3	11	C3AR1,CAPG,CD14,CD44,FCGR1A,HMOX1,ITGAM,ITGB2,LCN2,SPI1,TLR2	1	Phagocytosis of myeloid cells	100% (1/1)
3	27	1	RELA	25	AGT,APOE,C3,CCL11,Ccl2,CCL2,CCL22,CD14,CD44,CD80,CFTR,CHI3L1,CX3CL1,CXCL10,CXCL3,CXCL6,CYBB,HMOX1,IGF1,IL1RN,MMP9,PTGES,REG3A,TLR2,TREM1	1	Activation of myeloid cells	0% (0/1)
3	11	1	USP22	9	CYBB,FCGR2A,FCGR2B,ITGAM,ITGB2,MSR1,NCF1,NCF4,SPI1	1	Synthesis of reactive oxygen species	0% (0/1)
3	11	1	MET	9	AREG,CCL3L3,Ccl7,CD44,HMOX1,IL18,INHBA,SPP1,TNFSF8	1	Cell movement of myeloid cells	100% (1/1)
3	11	1	tyrphostin AG 1478	9	AREG,CAV1,CCL17,CCL2,F3,ITGAM,MMP9,NCF1,PLAU	1	Cell movement of myeloid cells	0% (0/1)
3	11	1	lipopolysaccharide	9	AGT,CCL2,CCL4,CD44,IGF1,LGALS1,NCF1,SLC2A1,SPP1	1	Migration of hepatic stellate cells	0% (0/1)
3	11	1	collagenase	9	CCL11,Ccl2,CCL3L3,CCL4,Ccl7,CXCL10,CXCL2,CXCL3,CXCL6	1	Chemotaxis of phagocytes	0% (0/1)
3	11	1	collagenase	9	CCL11,Ccl2,CCL3L3,CCL4,Ccl7,CXCL10,CXCL2,CXCL3,CXCL6	1	Homing of leukocytes	0% (0/1)
3	11	1	collagenase	9	CCL11,Ccl2,CCL3L3,CCL4,Ccl7,CXCL10,CXCL2,CXCL3,CXCL6	1	Chemotaxis of myeloid cells	0% (0/1)
3	11	1	SELPLG	9	CCL2,CCL4,CXCL2,HAVCR2,HCK,IGF1,IL1R2,ITGAM,PLAUR	1	Cell movement	100% (1/1)
3	11	1	SAMSN1	9	CCL3L3,CCL4,Ccl7,CXCL10,CXCL2,IL12B,IL18,INHBA,TNFSF8	1	Cell movement of myeloid cells	0% (0/1)
3	11	1	CD14	9	CCL1,Ccl2,CCL2,CCL4,CXCL10,F3,IL12B,MSR1,TLR2	1	Activation of blood cells	100% (1/1)
3	11	1	lysophosphatidylinositol	9	C3,CCL2,CD74,CFTR,CX3CL1,CXCL3,CXCL6,F3,TNFRSF4	1	Activation of blood cells	0% (0/1)
3	11	1	HMGB1	9	CCL2,CCL4,CXCL2,CXCL3,CXCL6,IRF5,MMP9,PTGES,TLR2	1	Cell movement of myeloid cells	100% (1/1)
3	11	1	Sn50 peptide	9	APOE,Ccl2,CXCL10,CXCL2,GJA1,HMOX1,MMP7,MMP9,SERPINE1	1	Cell movement of myeloid cells	0% (0/1)
3	11	1	Sn50 peptide	9	APOE,Ccl2,CXCL10,CXCL2,GJA1,HMOX1,MMP7,MMP9,SERPINE1	1	Cell movement of phagocytes	0% (0/1)
3	11	1	fingolimod	9	CCL1,CCL17,Ccl2,CCL2,CCL4,Ccl7,CXCL10,CXCL2,SERPINE1	1	Chemotaxis of phagocytes	0% (0/1)
3	11	1	fingolimod	9	CCL1,CCL17,Ccl2,CCL2,CCL4,Ccl7,CXCL10,CXCL2,SERPINE1	1	Chemotaxis of myeloid cells	0% (0/1)
3	11	1	CCL11	9	AIF1,CCL2,CCL28,CCL3L3,CCL4,CXCL11,CXCL3,CXCL6,ITGAM	1	Migration of mononuclear leukocytes	100% (1/1)
3	11	1	FKBP10	9	CCL17,IL1RL1,INHBA,LBP,MMP12,MMP14,SERPINE1,SPP1,TIMP1	1	Cell movement of myeloid cells	0% (0/1)
3	18	1	CD40LG	16	CCL17,CCL2,CCL22,CCL3L3,CCL4,CD44,CD63,CXCL10,CXCL2,F3,FCER2,FCGR2B,ITGAM,ITGB2,SERPINE1,SOD2	1	Recruitment of cells	100% (1/1)
3	18	1	CD40LG	16	CCL17,CCL2,CCL3L3,CCL4,CD44,CSF2RA,CXCL10,CXCL2,F3,IL12B,ITGAM,ITGB2,PLAU,PLAUR,SERPINE1,TNFSF8	1	Cell movement of granulocytes	0% (0/1)
3	11	1	PRKD	9	CCL11,Ccl2,CCL3L3,CCL4,CXCL10,CXCL2,CXCL3,CXCL6,IL12B	1	Chemotaxis of phagocytes	100% (1/1)
3	11	1	PRKD	9	CCL11,Ccl2,CCL3L3,CCL4,CXCL10,CXCL2,CXCL3,CXCL6,IL12B	1	Cell movement of granulocytes	100% (1/1)
3	11	1	PRKD	9	CCL11,Ccl2,CCL3L3,CCL4,CXCL10,CXCL2,CXCL3,CXCL6,IL12B	1	Chemotaxis of leukocytes	100% (1/1)
3	11	1	PRKD	9	CCL11,Ccl2,CCL3L3,CCL4,CXCL10,CXCL2,CXCL3,CXCL6,IL12B	1	Homing of leukocytes	100% (1/1)
3	11	1	PRKD	9	CCL11,Ccl2,CCL3L3,CCL4,CXCL10,CXCL2,CXCL3,CXCL6,IL12B	1	Chemotaxis of myeloid cells	100% (1/1)
3	11	1	PRKD	9	CCL11,Ccl2,CCL3L3,CCL4,CXCL10,CXCL2,CXCL3,CXCL6,IL12B	1	Migration of phagocytes	0% (0/1)
3	11	1	SCGB1A1	9	C3,CCL11,Ccl2,CDKN2A,ITGB2,MMP14,MMP9,S100A8,S100A9	1	Vasculogenesis	0% (0/1)
3	11	1	Hbb-b2	9	Ccl2,Ccl7,CD44,CD74,CXCL10,CYBB,ITGAM,SPI1,TLR2	1	Cell movement of myeloid cells	100% (1/1)
3	11	1	Hbb-b2	9	C1QA,Ccl2,CD44,CXCL10,CYBA,CYBB,ITGAM,SPI1,TLR2	1	Phagocytosis	100% (1/1)
3	11	1	S-(2,3-bispalmitoyloxypropyl)-cysteine-GDPKHPKSF	9	CCL2,CCL4,CD80,CD86,CXCL10,MMP9,SERPINE1,TLR1,TLR2	1	Activation of cells	0% (0/1)
3	11	1	C1QA	9	C3,C4A/C4B,C5AR1,Ccl2,CD163,CD44,CD80,CXCL10,LCN2	1	Activation of phagocytes	100% (1/1)
3	11	1	C1QA	9	C3,C4A/C4B,C5AR1,Ccl2,CD163,CD44,CD80,CXCL10,LCN2	1	Activation of myeloid cells	100% (1/1)
3	11	1	PLAUR	9	C5AR1,Ccl2,CCL2,CTSB,CXCL3,CYBB,ITGAM,MMP9,PLAU	1	Cell movement of phagocytes	100% (1/1)
3	11	1	PLAUR	9	C5AR1,Ccl2,CCL2,CTSB,CXCL3,CYBB,ITGAM,MMP9,PLAU	1	Cell movement of granulocytes	100% (1/1)
3	11	1	Hbb-b1	9	Ccl2,Ccl7,CD44,CD74,CXCL10,CYBB,ITGAM,SPI1,TLR2	1	Cell movement of myeloid cells	100% (1/1)
3	11	1	Hbb-b1	9	C1QA,Ccl2,CD44,CXCL10,CYBA,CYBB,ITGAM,SPI1,TLR2	1	Phagocytosis	100% (1/1)
3	11	1	platelet activating factor	9	CCL2,F3,ITGAM,ITGB2,MMP14,MMP9,PLAU,PLAUR,SERPINE1	1	Migration of myeloid cells	100% (1/1)
3	11	1	CCR5	9	Ccl2,CCL3L3,CCL4,CXCL10,CXCL2,CXCL3,F3,IL12B,MMP9	1	Cellular infiltration by leukocytes	100% (1/1)
3	11	1	CCR5	9	Ccl2,CCL3L3,CCL4,CXCL10,CXCL2,CXCL3,F3,IL12B,MMP9	1	Cell movement of granulocytes	100% (1/1)
3	11	1	CCR5	9	Ccl2,CCL3L3,CCL4,CXCL10,CXCL2,CXCL3,F3,IL12B,MMP9	1	Cellular infiltration	100% (1/1)
3	11	1	CISH	9	CCL3L3,CCL4,CD14,CXCL10,CXCL3,OLR1,OSM,PLAUR,SPP1	1	Binding of leukocytes	0% (0/1)
3	11	1	CISH	9	CCL3L3,CCL4,CD14,CXCL10,CXCL3,OLR1,OSM,PLAUR,SPP1	1	Adhesion of blood cells	0% (0/1)
3	11	1	tempol	9	CDKN2A,CXCL2,CYBA,F3,MMP9,NCF1,PLAUR,SERPINE1,SPP1	1	Vasculogenesis	0% (0/1)
3	11	1	immethridine	9	BTK,C3,C4A/C4B,CD14,CD44,FCGR1A,HP,LCN2,SIGLEC1	1	Engulfment of cells	0% (0/1)
3	11	1	E. coli lipopolysaccharide	9	CCL2,CD80,CD83,CD86,CXCL10,FOXP3,IL12B,IL18,TREM1	1	Hematopoiesis of mononuclear leukocytes	0% (0/1)
3	11	1	DDX58	9	BTK,C6,CCL2,CCL22,CXCL10,IL18,ITGAM,PLAUR,THBS1	1	Immune response of myeloid cells	100% (1/1)
3	11	1	Bay 11-7082	9	CCL2,CCL3L3,CCL4,Ccl7,CXCL3,F3,GJA1,IL18,TLR2	1	Flux of inorganic cation	0% (0/1)
3	11	1	E. coli lipopolysaccharide	9	CCL2,CD80,CD83,CD86,CXCL10,FOXP3,IL12B,IL18,TREM1	1	Differentiation of mononuclear leukocytes	0% (0/1)
3	11	1	MAPKAPK2	9	ARG1,CCL11,Ccl2,CCL2,CXCL10,IL18,MMP9,MSR1,Retnla	1	Activation of antigen presenting cells	0% (0/1)
3	11	1	MAPKAPK2	9	ARG1,CCL11,Ccl2,CCL2,CXCL10,IL18,MMP9,MSR1,Retnla	1	Activation of macrophages	0% (0/1)
3	11	1	Bay 11-7082	9	CCL2,CCL3L3,CCL4,Ccl7,CXCL3,F3,GJA1,IL18,TLR2	1	Flux of ion	0% (0/1)
3	11	1	Bay 11-7082	9	CCL2,CCL3L3,CCL4,Ccl7,CXCL3,F3,GJA1,IL18,TLR2	1	Flux of Ca2+	0% (0/1)
2.94	16	1	Jnk	14	CCL11,Ccl2,CCL2,CCL4,CD44,CXCL3,CXCL6,F3,HMOX1,MMP14,MMP9,PLAU,PLAUR,SERPINE1	1	Migration of myeloid cells	100% (1/1)
2.94	16	1	FN1	14	APOE,CCL2,CCL4,CXCL2,CXCL3,ITGAM,MMP14,MMP9,PLAU,PLAUR,SERPINE1,SPP1,THBS1,TLR2	1	Chemotaxis	100% (1/1)
2.887	14	1	troglitazone	12	C3,Ccl2,CCL2,CXCL10,CXCL11,CXCL3,CXCL6,HP,MMP9,PTGES,SERPINE1,SPP1	1	Chemotaxis of leukocytes	100% (1/1)
2.887	14	1	lipoteichoic acid	12	Ccl2,CCL2,CD14,CD80,CD86,CXCL10,CYBB,HMOX1,IL1RN,MMP9,TLR2,TREM1	1	Activation of myeloid cells	100% (1/1)
2.887	14	1	APP	12	C3,CCL11,Ccl2,CCL2,CCL3L3,CCL4,CXCL10,CXCL2,IL12B,IL18,LGALS3,OSM	1	Cell movement of eosinophils	0% (0/1)
2.887	14	1	CAMP	12	C5AR1,Ccl2,CCL2,CCL4,CXCL10,CXCL3,IL12B,IL18,IL1RN,ITGAM,ITGB2,TLR2	1	Cell movement of macrophages	100% (1/1)
2.887	14	1	SPI1	12	C3AR1,CCL22,CTSK,CTSS,CXCL10,CYBB,IL12B,IL18,IRF4,ITGB2,SPP1,TLR2	1	Quantity of macrophages	100% (1/1)
2.887	14	1	CSF3	12	C3AR1,CAPG,CD14,CD44,CXCL3,FCGR1A,HMOX1,ITGAM,ITGB2,LCN2,SPI1,TLR2	1	Response of phagocytes	100% (1/1)
2.887	14	1	Pam3-Cys-Ser-Lys4	12	Ccl2,CCL4,CD14,CXCL10,CXCL2,CXCL3,IL12B,IL18,MMP9,OSM,SPI1,TLR2	1	Cellular infiltration by granulocytes	100% (1/1)
2.858	8	1	CXCL2	6	Ccl2,CCL3L3,CCL4,CXCL10,CXCL3,ITGAM	1	Cell movement of neutrophils	100% (1/1)
2.858	8	1	CXCL2	6	Ccl2,CCL3L3,CCL4,CXCL10,CXCL3,ITGAM	1	Cell movement of granulocytes	100% (1/1)
2.858	8	1	CXCL2	6	Ccl2,CCL3L3,CCL4,CXCL10,CXCL3,ITGAM	1	Recruitment of phagocytes	100% (1/1)
2.858	8	1	CXCL2	6	Ccl2,CCL3L3,CCL4,CXCL10,CXCL3,ITGAM	1	Binding of leukocytes	100% (1/1)
2.858	8	1	CXCL2	6	Ccl2,CCL3L3,CCL4,CXCL10,CXCL3,ITGAM	1	Adhesion of blood cells	100% (1/1)
2.858	8	1	CXCL2	6	Ccl2,CCL3L3,CCL4,CXCL10,CXCL3,ITGAM	1	Recruitment of myeloid cells	100% (1/1)
2.858	8	1	CXCL2	6	Ccl2,CCL3L3,CCL4,CXCL10,CXCL3,ITGAM	1	Migration of phagocytes	100% (1/1)
2.858	8	1	C5AR1	6	C3,Ccl2,CXCL2,CXCL3,IL12B,MMP9	1	Cellular infiltration by granulocytes	100% (1/1)
2.858	8	1	C5AR1	6	C3,Ccl2,CXCL3,IL12B,MMP9,SERPINE1	1	Cell movement of macrophages	100% (1/1)
2.858	8	1	C5AR1	6	C3,CD80,CD86,CXCL3,IGF1,IL12B	1	Stimulation of cells	100% (1/1)
2.858	8	1	PTGES	6	Ccl2,CYBA,CYBB,MMP9,NCF1,SERPINE1	1	Angiogenesis	100% (1/1)
2.858	8	1	Ccl2	6	Ccl9,CTSK,CXCL10,CYBB,IGF1,SPP1	1	Quantity of antigen presenting cells	100% (1/1)
2.858	8	1	PTGES	6	Ccl2,CYBA,CYBB,MMP9,NCF1,SERPINE1	1	Development of vasculature	100% (1/1)
2.846	12	1	IL36A	10	Ccl7,CXCL10,CXCL2,CXCL3,CXCL6,IL12B,LCN2,MMP9,S100A8,S100A9	1	Cell movement of phagocytes	100% (1/1)
2.846	12	1	IL36A	10	Ccl7,CXCL10,CXCL2,CXCL3,CXCL6,IL12B,LCN2,MMP9,S100A8,S100A9	1	Inflammatory response	100% (1/1)
2.846	12	1	IL36A	10	Ccl7,CXCL10,CXCL2,CXCL3,CXCL6,IL12B,LCN2,MMP9,S100A8,S100A9	1	Cell movement of myeloid cells	100% (1/1)
2.846	12	1	E. coli B4 lipopolysaccharide	10	CCL1,CCL11,Ccl2,CCL2,CCL3L3,CCL4,CXCL10,IL12B,PTGES,TLR2	1	Chemotaxis of antigen presenting cells	0% (0/1)
2.846	12	1	D-fructose	10	AGT,Ccl2,Ccl7,CXCL10,CXCL2,FABP4,HP,ITGAM,THBS1,TIMP1	1	Cell movement of myeloid cells	0% (0/1)
2.846	12	1	Fcer1	10	CCL1,Ccl2,CCL2,CCL3L3,CCL4,Ccl7,Ccl9,CD4,CXCL3,INHBA	1	Chemotaxis	100% (1/1)
2.846	12	1	BHLHE40	10	C3AR1,CAPG,CD14,CSF2RB,FCGR2B,GLRX,MARCO,MSR1,PF4,TNFRSF9	1	Engulfment of phagocytes	0% (0/1)
2.846	12	1	BHLHE40	10	C3AR1,CAPG,CD14,CSF2RB,FCGR2B,GLRX,MARCO,MSR1,PF4,TNFRSF9	1	Engulfment of myeloid cells	0% (0/1)
2.846	12	1	CD36	10	CCL1,Ccl2,CD86,CXCL3,CXCL6,ITGAM,MMP14,PLAU,PLAUR,SERPINE1	1	Migration of phagocytes	0% (0/1)
2.846	12	1	ERK1/2	10	BCL2A1,CCL11,Ccl2,CCL2,CD44,CXCL10,CXCL3,F3,MMP9,SPP1	1	Accumulation of granulocytes	0% (0/1)
2.846	12	1	HBB	10	CCL11,Ccl2,CCL3L3,CCL4,CXCL10,CXCL2,CXCL3,CXCL6,IL12B,SERPINE1	1	Chemotaxis of phagocytes	0% (0/1)
2.846	12	1	HBB	10	CCL11,Ccl2,CCL3L3,CCL4,CXCL10,CXCL2,CXCL3,CXCL6,IL12B,SERPINE1	1	Chemotaxis of leukocytes	0% (0/1)
2.846	12	1	HBB	10	CCL11,Ccl2,CCL3L3,CCL4,CXCL10,CXCL2,CXCL3,CXCL6,IL12B,SERPINE1	1	Cell movement of granulocytes	0% (0/1)
2.846	12	1	HBB	10	CCL11,Ccl2,CCL3L3,CCL4,CXCL10,CXCL2,CXCL3,CXCL6,IL12B,SERPINE1	1	Chemotaxis of myeloid cells	0% (0/1)
2.846	12	1	HBB	10	CCL11,Ccl2,CCL3L3,CCL4,CXCL10,CXCL2,CXCL3,CXCL6,IL12B,SERPINE1	1	Homing of leukocytes	0% (0/1)
2.846	12	1	HBB	10	CCL11,Ccl2,CCL3L3,CCL4,CXCL10,CXCL2,CXCL3,CXCL6,IL12B,SERPINE1	1	Migration of phagocytes	0% (0/1)
2.846	12	1	2,4-dinitrofluorobenzene	10	ARG1,Ccl2,CCL3L3,CCL4,CXCL10,CXCL2,IL12B,IL18,IL24,PTGES	1	Cellular infiltration	100% (1/1)
2.846	12	1	2,4-dinitrofluorobenzene	10	ARG1,Ccl2,CCL3L3,CCL4,CXCL10,CXCL2,IL12B,IL18,IL24,PTGES	1	Inflammatory response	100% (1/1)
2.846	12	1	KLF6	10	AGT,CCL2,CCL22,CCL3L3,CD44,CXCL2,CXCL3,LGALS3,P2RY2,PTAFR	1	Mobilization of Ca2+	0% (0/1)
2.846	12	1	PTGS2	10	C5AR1,Ccl2,CCL2,CCL3L3,CD44,CXCL10,CXCL3,CYBB,MMP7,MMP9	1	Accumulation of leukocytes	100% (1/1)
2.846	12	1	CD40LG	10	CCL2,CCL22,CCL3L3,CCL4,CD44,CXCL10,F3,FCER2,ITGAM,ITGB2	1	Recruitment of antigen presenting cells	100% (1/1)
2.846	12	1	STING1	10	ARG1,BTK,CARD9,CD83,CD86,CXCL10,IL18,INHBA,IRF5,ITGAM	1	Lymphopoiesis	0% (0/1)
2.846	12	1	peptidoglycan	10	CCL2,CD80,CD86,CXCL10,CXCL2,CXCL3,ITGB2,S100A8,S100A9,TLR2	1	Interaction of phagocytes	0% (0/1)
2.846	12	1	CSF3	10	C3AR1,CAPG,CD14,CD44,FCGR1A,HMOX1,ITGAM,ITGB2,SPI1,TLR2	1	Response of antigen presenting cells	100% (1/1)
2.828	10	1	GPX1	8	Ccl2,CCL3L3,CCL4,CD14,CXCL10,CXCL3,CYBB,MMP9	1	Activation of cells	100% (1/1)
2.828	10	1	PSMB11	8	CCL11,Ccl2,CTSS,CXCL3,CXCL6,HMOX1,ITGAM,LGALS3	1	Migration of myeloid cells	0% (0/1)
2.828	10	1	HMG20A	8	CD44,CX3CL1,CXCL10,INHBA,MMP14,P2RY2,PLAUR,SERPINE1	1	Chemotaxis	0% (0/1)
2.828	10	1	IL17F	8	Ccl2,CCL2,CX3CL1,CXCL10,CXCL2,CXCL3,CXCL6,IGF1	1	Migration of cells	100% (1/1)
2.828	10	1	IL17F	8	Ccl2,CCL2,CX3CL1,CXCL10,CXCL2,CXCL3,CXCL6,IGF1	1	Inflammatory response	100% (1/1)
2.828	10	1	IL17F	8	Ccl2,CCL2,CX3CL1,CXCL10,CXCL2,CXCL3,CXCL6,IGF1	1	Chemotaxis	0% (0/1)
2.828	10	1	GIP	8	Ccl2,CCL2,CCL4,Ccl7,CXCL10,CXCL3,IL12B,SPP1	1	Cell movement of lymphatic system cells	0% (0/1)
2.828	10	1	SRC	8	CCL2,CTSB,CXCL10,F3,MMP9,PLAU,PLAUR,SPP1	1	Cell movement of granulocytes	0% (0/1)
2.828	10	1	hexachlorobenzene	8	C4A/C4B,CD14,CD44,FCGR2A,LCN2,LGALS3,MMP9,SPP1	1	Activation of myeloid cells	0% (0/1)
2.828	10	1	phorbol esters	8	CD44,CXCL6,ITGAM,MMP9,OSM,PLAU,SCG2,TIMP1	1	Cell movement of granulocytes	0% (0/1)
2.828	10	1	fluoromethyl 2,2-difluoro-1-(trifluoromethyl)vinyl ether	8	Ccl2,CD44,CXCL10,HMOX1,IL1RL1,LGALS3,SPP1,TIMP1	1	Cell movement of myeloid cells	0% (0/1)
2.828	10	1	puromycin aminonucleoside	8	C4A/C4B,CD14,CD44,CYBB,FCGR2A,LCN2,LGALS3,SPP1	1	Activation of myeloid cells	0% (0/1)
2.828	10	1	puromycin aminonucleoside	8	CD14,CD44,CYBA,CYBB,FCGR2A,LCN2,LGALS3,NCF1	1	Phagocytosis	0% (0/1)
2.828	10	1	RNASE1	8	CCL1,CCL2,CCL22,CCL4,CXCL10,FCER2,IL12B,OSM	1	Leukocyte migration	0% (0/1)
2.828	10	1	ITGAM	8	APOE,C5AR1,Ccl2,CD80,CD86,CXCL10,IL12B,LCN2	1	Immune response of leukocytes	100% (1/1)
2.828	10	1	EGLN	8	A2M,Ccl2,CCL2,CCL28,LCN2,OSM,S100A9,SERPINE1	1	Chemotaxis	0% (0/1)
2.828	10	1	RETNLB	8	Ccl2,CCL2,CCL3L3,FABP4,IGF1,Retnla,Tlr13,TLR2	1	Inflammatory response	100% (1/1)
2.828	10	1	VIPR1	8	Ccl2,CCL3L3,CCL4,CD80,CD86,CXCL10,CXCL2,CXCL3	1	Binding of leukocytes	0% (0/1)
2.828	10	1	VIPR1	8	Ccl2,CCL3L3,CCL4,CD80,CD86,CXCL10,CXCL2,CXCL3	1	Adhesion of blood cells	0% (0/1)
2.828	10	1	MAP2K1/2	8	C3,Ccl2,CCL3L3,CCL4,CXCL3,GJA1,HMOX1,MMP9	1	Cell movement of macrophages	0% (0/1)
2.828	10	1	MAP2K1/2	8	C3,Ccl2,CCL3L3,CCL4,CXCL3,GJA1,HMOX1,MMP9	1	Migration of phagocytes	0% (0/1)
2.828	10	1	MAP2K1/2	8	C3,Ccl2,CCL3L3,CCL4,CXCL3,GJA1,HMOX1,MMP9	1	Migration of antigen presenting cells	0% (0/1)
2.828	10	1	leukotriene D4	8	CCL2,CCL3L3,CCL4,CXCL2,CYSLTR1,EGR2,F3,NDRG1	1	Leukocyte migration	100% (1/1)
2.828	10	1	streptozocin	8	Ccl2,CCL3L3,HMOX1,LGALS3,MMP9,PF4,SERPINE1,SPP1	1	Cell movement of macrophages	100% (1/1)
2.828	10	1	LAMA5	8	Ccl2,CCL3L3,CCL4,Ccl7,CXCL10,CXCL3,MMP14,MMP9	1	Cell movement of phagocytes	0% (0/1)
2.828	10	1	LAMA5	8	Ccl2,CCL3L3,CCL4,Ccl7,CXCL10,CXCL3,MMP14,MMP9	1	Cell movement of myeloid cells	100% (1/1)
2.828	10	1	LAMA5	8	Ccl2,CCL3L3,CCL4,Ccl7,CXCL10,CXCL3,MMP14,MMP9	1	Cell movement of lymphatic system cells	0% (0/1)
2.828	10	1	TLR8	8	Ccl2,CCL2,CCL4,CD83,CD86,CXCL10,CXCL2,IL12B	1	Quantity of leukocytes	0% (0/1)
2.828	10	1	TLR8	8	CCL1,Ccl2,CCL2,CCL4,CD83,CD86,CXCL10,IL12B	1	Activation of leukocytes	100% (1/1)
2.828	10	1	PRKCA	8	CCL2,CXCL10,CXCL2,CXCL3,CYBB,MMP9,S100A8,S100A9	1	Accumulation of leukocytes	0% (0/1)
2.828	10	1	ADAMTS12	8	CCL11,CHI3L1,CLEC4E,CXCL10,LCN2,LGALS1,S100A8,S100A9	1	Inflammatory response	100% (1/1)
2.828	10	1	Hbb-b2	8	C1QA,Ccl2,CD44,CD74,CXCL10,CYBB,ITGAM,TLR2	1	Infection of mammalia	0% (0/1)
2.828	10	1	Hbb-b1	8	C1QA,Ccl2,CD44,CD74,CXCL10,CYBB,ITGAM,TLR2	1	Infection of mammalia	0% (0/1)
2.828	10	1	PTGS2	8	C5AR1,CCL2,CCL3L3,CCL4,CXCL3,CYBB,PF4,TREM1	1	Degranulation	0% (0/1)
2.828	10	1	PLAU	8	C5AR1,Ccl2,CCL2,CXCL3,F3,MMP9,S100A8,S100A9	1	Accumulation of neutrophils	0% (0/1)
2.828	10	1	diphenyleneiodonium	8	AGT,Ccl2,CCL2,CXCL2,CXCL3,F3,IL18,MMP9	1	Accumulation of neutrophils	0% (0/1)
2.828	10	1	ITPR2	8	BTK,Ccl2,CCL2,CCL3L3,CCL4,CD44,ITGB2,PTAFR	1	Extravasation	0% (0/1)
2.774	15	1	imiquimod	13	Ccl2,CCL22,CCL3L3,CCL4,CD80,CXCL10,CXCL2,CXCL3,HCK,IL18,ITGB2,S100A8,S100A9	1	Binding of leukocytes	0% (0/1)
2.774	15	1	imiquimod	13	Ccl2,CCL22,CCL3L3,CCL4,CD80,CXCL10,CXCL2,CXCL3,HCK,IL18,ITGB2,S100A8,S100A9	1	Adhesion of blood cells	0% (0/1)
2.774	15	1	imiquimod	13	Ccl2,CCL22,CCL3L3,CCL4,CXCL10,CXCL3,HCK,HMOX1,IL12B,IL18,IL1RN,ITGB2,S100A8	1	Cell movement of macrophages	0% (0/1)
2.774	15	1	EP300	13	AGT,BTK,CAPG,CCL2,CD80,CDKN2A,CXCL3,HMOX1,IL12B,IL12RB1,ITGB2,MAPT,TLR2	1	Immune response of cells	0% (0/1)
2.774	15	1	E. coli lipopolysaccharide	13	Ccl2,CCL2,CCL22,CCL4,CD80,CD83,CD86,CXCL10,FOXP3,IL12B,IL18,S100A9,TREM1	1	Activation of mononuclear leukocytes	0% (0/1)
2.75	18	1	GATA2	16	Ccl2,CCL2,CCL3L3,Ccl7,CHI3L1,CLEC4E,CX3CL1,CXCL10,CXCL2,ITGAM,LCN2,Mcpt4,P2RX1,S100A8,THBS1,TPSAB1/TPSB2	1	Recruitment of myeloid cells	0% (0/1)
2.714	13	1	doxorubicin	11	Ccl2,CCL2,CXCL2,CXCL3,CXCL6,LCN2,LGALS3,PLAUR,S100A8,S100A9,SPP1	1	Chemotaxis of granulocytes	0% (0/1)
2.714	13	1	CpG oligonucleotide	11	Ccl2,CCL3L3,CCL4,Ccl9,CD80,CD86,CXCL10,IL12B,IL18,SERPINE1,TLR2	1	Migration of antigen presenting cells	100% (1/1)
2.714	13	1	Interferon alpha	11	C3,C3AR1,CCL2,CXCL10,CXCL2,CXCL3,ITGAM,LGALS3,PLAUR,S100A9,SERPINB1	1	Chemotaxis of granulocytes	0% (0/1)
2.714	13	1	IL27	11	CCL2,CCL4,CD14,CD74,CD80,CD86,CX3CL1,CXCL10,CXCL11,IL18,ITGAM	1	Binding of leukocytes	0% (0/1)
2.714	13	1	IL27	11	CCL2,CCL4,CD14,CD74,CD80,CD86,CX3CL1,CXCL10,CXCL11,IL18,ITGAM	1	Adhesion of blood cells	0% (0/1)
2.714	13	1	NFAT5	11	Ccl2,CCL2,CD44,CXCL10,CXCL3,CYBB,IL1RN,LCN2,PTGES,SPP1,TLR2	1	Activation of phagocytes	0% (0/1)
2.714	13	1	NFAT5	11	Ccl2,CCL2,CD44,CXCL10,CXCL3,CYBB,IL1RN,LCN2,PTGES,SPP1,TLR2	1	Activation of myeloid cells	0% (0/1)
2.714	13	1	MAPK14	11	Ccl2,CCL2,CXCL10,CXCL2,CXCL3,F3,IL18,MMP9,S100A8,S100A9,SPP1	1	Accumulation of neutrophils	0% (0/1)
2.683	7	1	CXCL3	5	Ccl2,CCL3L3,CCL4,CXCL10,PLA2G2A	1	Activation of cells	100% (1/1)
2.683	7	1	CXCL3	5	Ccl2,CCL3L3,CCL4,CXCL10,PLA2G2A	1	Inflammatory response	100% (1/1)
2.683	7	1	PPT1	5	Ccl2,CCL4,CXCL10,CXCL3,OSM	1	Activation of phagocytes	100% (1/1)
2.683	7	1	PPT1	5	Ccl2,CCL4,CXCL10,CXCL3,OSM	1	Inflammatory response	100% (1/1)
2.683	7	1	LGALS3	5	CCL2,CXCL2,CXCL3,ITGAM,MSR1	1	Binding of professional phagocytic cells	100% (1/1)
2.683	7	1	LGALS3	5	CXCL2,CXCL3,FABP4,ITGAM,SPP1	1	Infiltration by neutrophils	100% (1/1)
2.683	7	1	LGALS3	5	CCL2,CXCL2,CXCL3,ITGAM,MSR1	1	Binding of myeloid cells	100% (1/1)
2.668	19	1	CTNNB1	17	CCL2,CCL22,CCL4,Ccl9,CD4,CD44,CX3CL1,CXCL10,CXCL2,CXCL3,CXCL6,GJA1,GNAO1,ITGB2,LGALS3,PLAUR,TRH	1	Mobilization of Ca2+	0% (0/1)
2.667	11	1	PTPN6	9	Ccl2,CCL3L3,CD44,CXCL10,CYBB,IL12B,ITGB2,MMP9,TIMP1	1	Cell movement of granulocytes	100% (1/1)
2.667	11	1	hydroxypropyl-beta-cyclodextrin	9	APOE,C2,CCL2,CCL3L3,CD44,CTSB,CXCL13,CXCL6,ITGAX	1	Cell movement of phagocytes	0% (0/1)
2.667	11	1	VIP	9	Ccl2,CCL2,CCL3L3,CCL4,CXCL10,CXCL2,CXCL3,IL12B,LGALS1	1	Chemotaxis of leukocytes	100% (1/1)
2.667	11	1	VIP	9	Ccl2,CCL2,CCL3L3,CCL4,CXCL10,CXCL2,CXCL3,IL12B,LGALS1	1	Chemotaxis of myeloid cells	100% (1/1)
2.667	11	1	resveratrol	9	Ccl2,CCL2,CCL3L3,CXCL10,CXCL2,FABP4,IGFBP3,IL12B,IL18	1	Cell movement of eosinophils	0% (0/1)
2.667	11	1	BID	9	C3AR1,C5AR1,Ccl2,CTSB,CTSK,CTSS,ITGAX,MMP12,TIMP1	1	Cell movement of myeloid cells	100% (1/1)
2.667	11	1	CXCL8	9	CD44,CD74,CXCL2,CXCL3,F3,ITGAM,ITGB2,LGALS3,MMP9	1	Recruitment of phagocytes	100% (1/1)
2.667	11	1	CXCL8	9	CD44,CD74,CXCL2,CXCL3,F3,ITGAM,ITGB2,LGALS3,MMP9	1	Recruitment of myeloid cells	100% (1/1)
2.667	11	1	Mek	9	APOE,Ccl2,CXCL10,CXCL11,F3,MMP9,OSM,SERPINE1,THBS1	1	Recruitment of leukocytes	0% (0/1)
2.667	11	1	IL11RA	9	CCL11,CCL17,Ccl2,CCL3L3,CCL4,Ccl7,CXCL2,CXCL3,MMP7	1	Chemotaxis of phagocytes	0% (0/1)
2.667	11	1	IL11RA	9	CCL11,CCL17,Ccl2,CCL3L3,CCL4,Ccl7,CXCL2,CXCL3,MMP7	1	Chemotaxis of myeloid cells	0% (0/1)
2.667	11	1	N-acetyl-L-cysteine	9	C3,Ccl2,CCL2,CXCL10,CXCL3,IL18,ITGAM,PLAUR,SPP1	1	Chemotaxis of granulocytes	0% (0/1)
2.667	11	1	RETN	9	Ccl2,CCL2,CX3CL1,CXCL3,FABP4,HMOX1,MMP14,SERPINE1,SPP1	1	Cell movement of myeloid cells	100% (1/1)
2.667	11	1	RETN	9	Ccl2,CCL2,CX3CL1,CXCL3,FABP4,HMOX1,MMP14,SERPINE1,SPP1	1	Cell movement of phagocytes	100% (1/1)
2.667	11	1	DDX58	9	BTK,C6,CCL2,CCL22,CXCL10,IL18,ITGAM,PLAUR,THBS1	1	Response of myeloid cells	100% (1/1)
2.667	11	1	enterotoxin B	9	Ccl2,CCL2,CCL4,CD80,CSF2RB,CXCL10,CXCL13,CXCL6,IL12B	1	Quantity of lymphatic system cells	100% (1/1)
2.667	11	1	DDX58	9	BTK,C6,CCL2,CCL22,CXCL10,IL18,ITGAM,PLAUR,THBS1	1	Immune response of phagocytes	100% (1/1)
2.667	11	1	CAMP	9	CCL2,CD86,CXCL10,CXCL3,IL18,ITGAM,ITGAX,ITGB2,TLR2	1	Immune response of phagocytes	100% (1/1)
2.667	11	1	Ccl2	9	Ccl9,CTSB,CXCL10,CXCL2,CXCL3,CYBB,FABP4,IGF1,SPP1	1	Invasive tumor	100% (1/1)
2.667	11	1	FCGR2A	9	Ccl2,CCL2,CCL22,CCL4,CLEC4E,CXCL10,GPR84,IL12B,IL18	1	Hypersensitive reaction	100% (1/1)
2.646	9	1	IMMT	7	AREG,CXCL10,CXCL2,CXCL3,CXCL6,INHBA,SERPINE1	1	Cell movement of phagocytes	0% (0/1)
2.646	9	1	BCL3	7	AGT,CD80,CD86,CXCL10,CXCL3,EGR2,HLA-DQB1	1	Leukopoiesis	100% (1/1)
2.646	9	1	JAK inhibitor I	7	C3,CXCL10,CXCL11,CXCL2,CXCL3,CXCL6,TRPA1	1	Mobilization of Ca2+	0% (0/1)
2.646	9	1	PF-4878691	7	CCL2,CCL4,CD80,CD83,CD86,CXCL10,IL12B	1	Quantity of leukocytes	0% (0/1)
2.646	9	1	PF-4878691	7	CCL2,CCL4,CD80,CD83,CD86,CXCL10,IL12B	1	Activation of leukocytes	100% (1/1)
2.646	9	1	PF-4878691	7	CCL2,CCL4,CD80,CD83,CD86,CXCL10,IL12B	1	Quantity of lymphatic system cells	0% (0/1)
2.646	9	1	SIGIRR	7	Ccl2,CCL3L3,CXCL2,CXCL3,IL18,S100A8,S100A9	1	Cell movement of neutrophils	100% (1/1)
2.646	9	1	SIGIRR	7	Ccl2,CCL3L3,CXCL2,CXCL3,IL18,S100A8,S100A9	1	Chemotaxis of phagocytes	0% (0/1)
2.646	9	1	SIGIRR	7	Ccl2,CCL3L3,CXCL2,CXCL3,IL18,S100A8,S100A9	1	Chemotaxis of granulocytes	0% (0/1)
2.646	9	1	SIGIRR	7	Ccl2,CCL3L3,CXCL2,CXCL3,IL18,S100A8,S100A9	1	Chemotaxis of myeloid cells	0% (0/1)
2.646	9	1	SIGIRR	7	Ccl2,CCL3L3,CXCL2,CXCL3,IL18,S100A8,S100A9	1	Adhesion of immune cells	0% (0/1)
2.646	9	1	SIGIRR	7	Ccl2,CCL3L3,CXCL2,CXCL3,IL18,S100A8,S100A9	1	Homing of leukocytes	0% (0/1)
2.646	9	1	SIGIRR	7	Ccl2,CCL3L3,CXCL2,CXCL3,IL18,S100A8,S100A9	1	Accumulation of leukocytes	0% (0/1)
2.646	9	1	SIGIRR	7	Ccl2,CCL3L3,CXCL2,CXCL3,IL18,S100A8,S100A9	1	Adhesion of blood cells	0% (0/1)
2.646	9	1	SIGIRR	7	Ccl2,CCL3L3,CXCL2,CXCL3,IL18,S100A8,S100A9	1	Migration of phagocytes	0% (0/1)
2.646	9	1	SIGIRR	7	Ccl2,CCL3L3,CXCL2,CXCL3,IL18,S100A8,S100A9	1	Migration of myeloid cells	0% (0/1)
2.646	9	1	SIGIRR	7	Ccl2,CCL3L3,CXCL2,CXCL3,IL18,S100A8,S100A9	1	Accumulation of myeloid cells	0% (0/1)
2.646	9	1	CD3	7	CCL17,CCL3L3,CCL4,CRLF2,CXCL10,IL12B,TNFRSF9	1	Cell movement of eosinophils	0% (0/1)
2.646	9	1	PF4	7	CCL2,CCL22,CD86,CXCL3,F3,IL12B,ITGAM	1	Immune response of leukocytes	100% (1/1)
2.646	9	1	PF4	7	CCL2,CCL22,CCL4,CXCL3,IL12B,IL1RN,ITGAM	1	Cell movement of macrophages	100% (1/1)
2.646	9	1	PF4	7	CCL2,CCL22,CCL4,CD86,CXCL3,F3,ITGAM	1	Transmigration of cells	0% (0/1)
2.646	9	1	IFNG	7	F3,HMOX1,SERPINE1,SLC11A1,SOD2,SPI1,SPP1	1	Increased Levels of Hematocrit	0% (0/1)
2.646	9	1	CpG ODN 1668	7	Ccl2,CCL3L3,CCL4,CD80,CD86,CXCL10,IL12B	1	Quantity of leukocytes	0% (0/1)
2.646	9	1	CpG ODN 1668	7	Ccl2,CCL3L3,CD80,CD86,CXCL10,CXCL3,IL12B	1	Accumulation of leukocytes	0% (0/1)
2.646	9	1	Ifn	7	CXCL10,IL12B,LCN2,S100A8,SERPINE1,SPP1,TLR2	1	Chemotaxis of myeloid cells	0% (0/1)
2.646	9	1	FRS3	7	CCL2,CCL3L3,CCL4,Ccl9,CXCL6,IGF1,IL18	1	Migration of cells	0% (0/1)
2.646	9	1	FRS3	7	CCL2,CCL3L3,CCL4,Ccl9,CXCL6,IGF1,IL18	1	Quantity of leukocytes	0% (0/1)
2.646	9	1	FRS3	7	CCL2,CCL3L3,CCL4,Ccl9,CXCL6,IGF1,IL18	1	Activation of cells	0% (0/1)
2.646	9	1	FRS3	7	CCL2,CCL3L3,CCL4,Ccl9,CXCL6,IGF1,IL18	1	Chemotaxis	0% (0/1)
2.646	9	1	actinomycin D	7	CCL11,CCL2,PLAU,PLAUR,SERPINE1,SPP1,TLR2	1	Chemotaxis of phagocytes	100% (1/1)
2.646	9	1	actinomycin D	7	CCL11,CCL2,PLAU,PLAUR,SERPINE1,SPP1,TLR2	1	Chemotaxis of myeloid cells	100% (1/1)
2.646	9	1	SENP3	7	CCL3L3,CCL4,CD4,CD80,CD86,CXCL10,IL12B	1	Activation of cells	0% (0/1)
2.646	9	1	SLC15A4	7	CCL2,CD72,CXCL10,HMOX1,ITGAM,LGALS3,PLAUR	1	Cell movement of phagocytes	0% (0/1)
2.646	9	1	SLC15A4	7	CCL2,CXCL10,HMOX1,ITGAM,LGALS3,MSR1,PLAUR	1	Immune response of leukocytes	0% (0/1)
2.646	9	1	fenamic acid	7	CD14,CD44,ELF3,FCGR2A,LCN2,LGALS3,STING1	1	Immune response of cells	0% (0/1)
2.646	9	1	fenamic acid	7	C4A/C4B,CD14,CD44,FCGR2A,LCN2,LGALS3,SPP1	1	Activation of myeloid cells	0% (0/1)
2.646	9	1	E. coli serotype 0127B8 lipopolysaccharide	7	CCL17,Ccl2,CCL2,CXCL10,CXCL2,IL12B,LGALS3	1	Cell movement of eosinophils	0% (0/1)
2.646	9	1	bisindolylmaleimide I	7	AGT,CD44,HMOX1,MMP12,MMP7,MMP9,SERPINE1	1	Cell movement of myeloid cells	100% (1/1)
2.646	9	1	bisindolylmaleimide I	7	AGT,CD44,HMOX1,MMP12,MMP7,MMP9,SERPINE1	1	Migration of phagocytes	100% (1/1)
2.646	9	1	AREG	7	CCNA2,CCNB1,CCNF,EREG,MMP9,MYBL2,PLAU	1	Growth of connective tissue	100% (1/1)
2.646	9	1	CXCL12	7	CD14,CD4,CD44,CX3CL1,CXCL10,PLAU,THBS1	1	Engulfment of cells	100% (1/1)
2.646	9	1	etanercept	7	CCL2,CXCL10,CYBB,IL12B,MMP12,NCF1,PTGES	1	Cellular infiltration by myeloid cells	0% (0/1)
2.646	9	1	etanercept	7	CCL2,CXCL10,CYBB,IL12B,MMP12,NCF1,PTGES	1	Cellular infiltration by leukocytes	0% (0/1)
2.646	9	1	triamterene	7	CD14,CD44,ELF3,FCGR2A,LCN2,LGALS3,STING1	1	Immune response of cells	0% (0/1)
2.646	9	1	triamterene	7	C4A/C4B,CD14,CD44,FCGR2A,LCN2,LGALS3,SPP1	1	Activation of myeloid cells	0% (0/1)
2.646	9	1	CGS 21680	7	Ccl2,CCL22,CCL3L3,CCL4,F3,IL12B,PPARGC1A	1	Migration of cells	100% (1/1)
2.646	9	1	CGS 21680	7	Ccl2,CCL22,CCL3L3,CCL4,F3,IL12B,PPARGC1A	1	Quantity of leukocytes	0% (0/1)
2.646	9	1	YAP1	7	Ccl2,CCL22,CXCL2,CXCL3,ITGB2,SERPINE1,THBS1	1	Recruitment of myeloid cells	100% (1/1)
2.646	9	1	YAP1	7	Ccl2,CCL22,CXCL2,CXCL3,ITGB2,SERPINE1,THBS1	1	Recruitment of phagocytes	100% (1/1)
2.646	9	1	CITED2	7	C3,C5AR1,Ccl2,CCL2,CXCL10,CXCL2,CXCL3	1	Chemotaxis of granulocytes	0% (0/1)
2.646	9	1	CITED2	7	C3,Ccl2,CCL2,CXCL10,CXCL2,IL12B,OSM	1	Cell movement of eosinophils	0% (0/1)
2.646	9	1	Pam3-Cys	7	CCL2,CXCL10,CXCL2,CXCL3,IL12B,SERPINE1,TLR2	1	Chemotaxis of phagocytes	0% (0/1)
2.646	9	1	Pam3-Cys	7	CCL2,CXCL10,CXCL2,CXCL3,IL12B,SERPINE1,TLR2	1	Chemotaxis of myeloid cells	0% (0/1)
2.646	9	1	plicamycin	7	CCL2,CX3CL1,F3,HMOX1,PLAUR,SERPINE1,TIMP1	1	Cell movement of myeloid cells	0% (0/1)
2.646	9	1	GNAI3	7	CCL1,CCL2,CCL3L3,CCL4,CXCL3,IL24,SPP1	1	Cell movement of phagocytes	100% (1/1)
2.646	9	1	GNAI3	7	CCL1,CCL2,CCL3L3,CCL4,CXCL3,IL24,SPP1	1	Activation of cells	0% (0/1)
2.646	9	1	GNAI3	7	CCL1,CCL2,CCL3L3,CCL4,CXCL3,IL24,SPP1	1	Cell movement of myeloid cells	100% (1/1)
2.646	9	1	GNAI3	7	CCL1,CCL2,CCL3L3,CCL4,CXCL3,IL24,SPP1	1	Cell movement of antigen presenting cells	100% (1/1)
2.646	9	1	ABCG1	7	Ccl2,CCL3L3,CCL4,CXCL13,CXCL3,IL12B,SFTPD	1	Cell movement of phagocytes	0% (0/1)
2.646	9	1	ABCG1	7	Ccl2,CCL3L3,CCL4,CXCL13,CXCL3,IL12B,SFTPD	1	Homing of leukocytes	0% (0/1)
2.646	9	1	ABCG1	7	Ccl2,CCL3L3,CCL4,CXCL13,CXCL3,IL12B,SFTPD	1	Cell movement of antigen presenting cells	0% (0/1)
2.646	9	1	IL-1R	7	AREG,CXCL2,CXCL3,MMP12,MMP9,PLAU,TIMP1	1	Cellular infiltration by myeloid cells	100% (1/1)
2.646	9	1	IL-1R	7	CXCL2,CXCL3,MMP12,MMP9,PLAU,SERPINE1,TIMP1	1	Cell movement of neutrophils	100% (1/1)
2.646	9	1	IL-1R	7	AREG,CXCL2,CXCL3,MMP12,MMP9,PLAU,TIMP1	1	Cellular infiltration by phagocytes	100% (1/1)
2.646	9	1	ZFTA-RELA	7	Ccl2,CCL3L3,CD44,CX3CL1,CXCL10,CXCL2,CXCL3	1	Binding of leukocytes	0% (0/1)
2.646	9	1	ZFTA-RELA	7	Ccl2,CCL3L3,CD44,CX3CL1,CXCL10,CXCL2,CXCL3	1	Adhesion of blood cells	0% (0/1)
2.646	9	1	IRF4	7	Ccl2,CXCL10,CXCL3,IL12B,IL1RN,SPP1,TNFRSF9	1	Cellular infiltration by granulocytes	0% (0/1)
2.646	9	1	tyrphostin AG490	7	AGT,Ccl2,CCL2,CTSK,IGF1,MMP9,SPP1	1	Quantity of antigen presenting cells	0% (0/1)
2.646	9	1	tyrphostin AG490	7	AGT,Ccl2,CCL2,CXCL2,IGF1,MMP9,SPP1	1	Transmigration of cells	0% (0/1)
2.646	9	1	tyrphostin AG490	7	AGT,Ccl2,CCL2,CXCL2,MMP9,PTX3,SPP1	1	Accumulation of neutrophils	0% (0/1)
2.646	9	1	CLEC7A	7	CCL17,CCL2,CCL22,CCL3L3,CCL4,CXCL2,IL12B	1	Chemotaxis of phagocytes	0% (0/1)
2.646	9	1	CLEC7A	7	CCL17,CCL2,CCL22,CCL3L3,CCL4,CXCL2,IL12B	1	Chemotaxis of leukocytes	0% (0/1)
2.646	9	1	CLEC7A	7	CCL17,CCL2,CCL22,CCL3L3,CCL4,CXCL2,IL12B	1	Chemotaxis of myeloid cells	0% (0/1)
2.646	9	1	CLEC7A	7	CCL17,CCL2,CCL22,CCL3L3,CCL4,CXCL2,IL12B	1	Chemotaxis	0% (0/1)
2.646	9	1	CLEC7A	7	CCL17,CCL2,CCL22,CCL3L3,CCL4,CXCL2,IL12B	1	Homing of leukocytes	0% (0/1)
2.646	9	1	CLEC7A	7	CCL17,CCL2,CCL22,CCL3L3,CCL4,CXCL2,IL12B	1	Migration of phagocytes	0% (0/1)
2.646	9	1	MAP3K7	7	Ccl2,Ccl7,CXCL10,CXCL2,CXCL6,IL12B,SERPINE1	1	Chemotaxis of phagocytes	0% (0/1)
2.646	9	1	MAP3K7	7	Ccl2,Ccl7,CXCL10,CXCL2,CXCL6,IL12B,SERPINE1	1	Homing of leukocytes	0% (0/1)
2.646	9	1	MAP3K7	7	Ccl2,Ccl7,CXCL10,CXCL2,CXCL6,IL12B,SERPINE1	1	Chemotaxis of myeloid cells	0% (0/1)
2.646	9	1	MAP3K7	7	Ccl2,CXCL10,CXCL2,CXCL6,HMOX1,IL12B,SERPINE1	1	Migration of phagocytes	0% (0/1)
2.646	9	1	CORT	7	Ccl2,CCL3L3,CCL4,Ccl7,CXCL10,CXCL3,IL18	1	Chemotaxis of phagocytes	0% (0/1)
2.646	9	1	CORT	7	Ccl2,CCL3L3,CCL4,Ccl7,CXCL10,CXCL3,IL18	1	Chemotaxis of leukocytes	0% (0/1)
2.646	9	1	CORT	7	Ccl2,CCL3L3,CCL4,Ccl7,CXCL10,CXCL3,IL18	1	Chemotaxis of myeloid cells	0% (0/1)
2.646	9	1	CORT	7	Ccl2,CCL3L3,CCL4,Ccl7,CXCL10,CXCL3,IL18	1	Chemotaxis	0% (0/1)
2.646	9	1	CORT	7	Ccl2,CCL3L3,CCL4,Ccl7,CXCL10,CXCL3,IL18	1	Homing of leukocytes	0% (0/1)
2.646	9	1	CORT	7	Ccl2,CCL3L3,CCL4,Ccl7,CXCL10,CXCL3,IL18	1	Cell movement of lymphatic system cells	0% (0/1)
2.646	9	1	JQ1	7	Ccl2,CD4,CFTR,CXCL3,IL24,SPP1,TLR2	1	Activation of myeloid cells	0% (0/1)
2.646	9	1	lomustine	7	CD14,CD44,ELF3,FCGR2A,LCN2,LGALS3,STING1	1	Immune response of cells	0% (0/1)
2.646	9	1	lomustine	7	C4A/C4B,CD14,CD44,FCGR2A,LCN2,LGALS3,SPP1	1	Activation of myeloid cells	0% (0/1)
2.646	9	1	2-bromoethylamine	7	CD14,CD44,ELF3,FCGR2A,LCN2,LGALS3,STING1	1	Immune response of cells	0% (0/1)
2.646	9	1	2-bromoethylamine	7	C4A/C4B,CD14,CD44,FCGR2A,LCN2,LGALS3,SPP1	1	Activation of myeloid cells	0% (0/1)
2.646	9	1	1-palmitoyl-2-oleoylphosphatidylserine	7	CCL1,CCL3L3,CCL4,CXCL10,CXCL3,OSM,Tnfsf9	1	Lymphocyte migration	0% (0/1)
2.646	9	1	1-palmitoyl-2-oleoylphosphatidylserine	7	CCL1,CCL3L3,CCL4,CXCL10,CXCL3,OSM,Tnfsf9	1	Migration of lymphatic system cells	0% (0/1)
2.646	9	1	TRADD	7	BCL2A1,CCL2,CX3CL1,CXCL11,CXCL2,CXCL3,MMP9	1	Inflammatory response	100% (1/1)
2.646	9	1	vitamin E	7	CCL2,Ccl9,CD44,F3,MMP14,SERPINE1,SPP1	1	Activation of cells	100% (1/1)
2.646	9	1	MALP-2s	7	CCL3L3,CCL4,CXCL2,CXCL3,IL12B,ITGAM,TLR2	1	Cell movement of granulocytes	100% (1/1)
2.646	9	1	MALP-2s	7	CCL3L3,CCL4,CD86,CXCL2,CXCL3,ITGAM,TLR2	1	Adhesion of immune cells	0% (0/1)
2.646	9	1	MALP-2s	7	CCL3L3,CCL4,CD86,CXCL2,CXCL3,ITGAM,TLR2	1	Adhesion of blood cells	0% (0/1)
2.646	9	1	gentamicin C	7	C4A/C4B,CD14,CD44,FCGR2A,LCN2,LGALS3,SPP1	1	Activation of myeloid cells	0% (0/1)
2.646	9	1	PGLYRP2	7	CCL17,Ccl2,CCL2,CCL4,Ccl7,CXCL2,CXCL6	1	Chemotaxis of phagocytes	0% (0/1)
2.646	9	1	PGLYRP2	7	CCL17,Ccl2,CCL2,CCL4,Ccl7,CXCL2,CXCL6	1	Chemotaxis of leukocytes	0% (0/1)
2.646	9	1	PGLYRP2	7	CCL17,Ccl2,CCL2,CCL4,Ccl7,CXCL2,CXCL6	1	Chemotaxis of myeloid cells	0% (0/1)
2.646	9	1	PGLYRP2	7	CCL17,Ccl2,CCL2,CCL4,Ccl7,CXCL2,CXCL6	1	Chemotaxis	0% (0/1)
2.646	9	1	PGLYRP2	7	CCL17,Ccl2,CCL2,CCL4,Ccl7,CXCL2,CXCL6	1	Homing of leukocytes	0% (0/1)
2.646	9	1	RNASE2	7	CCL1,CCL2,CCL22,CCL4,CXCL10,IL12B,OSM	1	Chemotaxis	100% (1/1)
2.646	9	1	RNASE2	7	CCL1,CCL2,CCL22,CD86,CXCL10,IL12B,OSM	1	Accumulation of leukocytes	0% (0/1)
2.646	9	1	RNASE2	7	CCL1,CCL2,CCL22,CCL4,CD86,CXCL10,OSM	1	Activation of antigen presenting cells	100% (1/1)
2.646	9	1	SOCS1	7	ARG1,Ccl2,CCL2,CD44,CD86,CXCL10,Retnla	1	Activation of phagocytes	100% (1/1)
2.646	9	1	SOCS1	7	ARG1,Ccl2,CCL2,CD44,CD86,CXCL10,Retnla	1	Activation of myeloid cells	100% (1/1)
2.646	9	1	SOCS1	7	ARG1,Ccl2,CCL2,CD44,CD86,CXCL10,Retnla	1	Activation of antigen presenting cells	100% (1/1)
2.646	9	1	ruxolitinib	7	BTK,CCL2,CD44,CTSD,CXCL10,IL18,MSR1	1	Immune response of cells	0% (0/1)
2.646	9	1	PPIF	7	Ccl2,CCL4,CXCL10,CXCL2,CXCL3,DLK1,PF4	1	Cellular infiltration by granulocytes	0% (0/1)
2.646	9	1	Alpha catenin	7	CXCL10,CXCL2,ITGAM,PLAU,S100A8,S100A9,THBS2	1	Binding of leukocytes	0% (0/1)
2.646	9	1	CpG ODN 1826	7	CD14,CXCL10,CYBA,CYBB,FCGR1A,FCGR2B,NCF1	1	Phagocytosis	100% (1/1)
2.646	9	1	aldosterone	7	AGT,Ccl2,CCL2,CYBB,KL,LGALS3,SPP1	1	Cellular infiltration by macrophages	100% (1/1)
2.646	9	1	diphenyleneiodonium	7	AGT,Ccl2,CCL2,HMOX1,IL18,MMP12,MMP9	1	Cellular infiltration by macrophages	0% (0/1)
2.646	9	1	lysophosphatidylcholine	7	Ccl2,CCL2,CYBB,GJA1,IRF5,PLAU,TNFRSF9	1	Cellular infiltration by macrophages	0% (0/1)
2.646	9	1	CCL5	7	C5AR1,CCL2,CCL3L3,CCL4,CXCL3,ITGAM,PLAUR	1	Degranulation of cells	0% (0/1)
2.646	9	1	CFI-402257	7	CCL2,EREG,IGF1,INHBA,MMP14,PLAU,PLAUR	1	Growth of muscle tissue	0% (0/1)
2.646	9	1	CFI-402257	7	CCL2,EREG,IGF1,INHBA,MMP14,PLAU,PLAUR	1	Proliferation of muscle cells	0% (0/1)
2.611	35	1	cardiotoxin	33	C5AR1,CCL1,CCL11,CCL17,Ccl2,CCL2,CCL3L3,CCL4,Ccl7,Ccl9,CX3CL1,CXCL10,CXCL13,GSN,HP,IGF1,IGF2,IL18,INHBA,ITGAM,ITGB2,LCN2,MMP7,NTF3,OSM,PIGR,S100A8,S100A9,SERPINE1,SERPINF1,SPP1,THBS1,TREM1	1	Chemotaxis	0% (0/1)
2.598	14	1	ANGPT2	12	AGT,Ccl2,CCL3L3,CD86,CYBB,HMOX1,IL18,ITGAX,MMP7,MMP9,PLAU,SERPINE1	1	Migration of phagocytes	100% (1/1)
2.598	14	1	BCL6	12	Ccl2,CCL2,CCL3L3,CCL4,Ccl7,CD72,CXCL10,CXCL3,IL12B,IL18,LITAF,SERPINE1	1	Chemotaxis of phagocytes	0% (0/1)
2.598	14	1	BCL6	12	Ccl2,CCL2,CCL3L3,CCL4,Ccl7,CD72,CXCL10,CXCL3,IL12B,IL18,LITAF,SERPINE1	1	Chemotaxis of myeloid cells	0% (0/1)
2.598	14	1	AHR	12	CCL1,Ccl2,CCL22,CSF2RB,CXCL10,CXCL11,CXCL13,CXCL2,ITGAM,REG3A,SERPINE1,SPP1	1	Migration of phagocytes	0% (0/1)
2.598	14	1	E. coli lipopolysaccharide	12	Ccl2,CCL2,CCL22,CCL4,CD80,CD83,CD86,CXCL10,FOXP3,IL12B,IL18,S100A9	1	Activation of lymphoid cells	0% (0/1)
2.598	14	1	E. coli lipopolysaccharide	12	Ccl2,CCL2,CCL22,CCL4,CD80,CD83,CD86,CXCL10,FOXP3,IL12B,IL18,S100A9	1	Activation of lymphocytes	0% (0/1)
2.582	17	1	Ap1	15	C3AR1,CCL2,CCL3L3,CCL4,CD44,HMOX1,IL12B,MMP12,MMP7,MMP9,NDRG1,NOG,PLAU,SERPINE1,SFTPD	1	Cell movement of macrophages	0% (0/1)
2.582	17	1	poly rI:rC-RNA	15	C3,CCL11,CD14,CD44,CX3CL1,CXCL10,CXCL3,IL18,ITGAM,ITGAX,PLAU,PLAUR,SFTPD,THBS1,TLR2	1	Response of myeloid leukocytes	0% (0/1)
2.53	12	1	BCR-ABL1	10	CAV1,CCL2,CDKN2A,CSF2RB,HK2,HMOX1,LCN2,OSM,PIM1,SLC2A1	1	Angiogenesis	0% (0/1)
2.53	12	1	IL7	10	Ccl2,CCL2,CCL4,CTSK,CXCL2,CXCL3,IL24,MMP9,TNFRSF9,TNFSF8	1	Cellular infiltration by myeloid cells	0% (0/1)
2.53	12	1	thapsigargin	10	C5AR1,Ccl2,CD80,CD86,CXCL10,CXCL3,HMOX1,ITGB2,THBS1,TLR2	1	Immune response of leukocytes	0% (0/1)
2.53	12	1	CEBPD	10	AGT,C3,Ccl2,CCL3L3,CXCL3,HP,IGF1,ITGAM,PTAFR,SFTPD	1	Homing of cells	0% (0/1)
2.53	12	1	NOS2	10	Ccl2,CCL2,CD44,CD53,CD80,CD86,GJA1,THY1,TIMP1,TYROBP	1	Cell-cell contact	100% (1/1)
2.53	12	1	NCOA3	10	CCNE1,CDC6,HK2,HMOX1,IGF1,IGFBP3,MMP9,Muc1,SLC16A3,SLC2A1	1	Growth of tumor	100% (1/1)
2.53	12	1	ciglitazone	10	AGT,APOE,Ccl2,CCL2,CYBB,GSN,IL12B,LCN2,MMP9,SERPINE1	1	Cell movement of granulocytes	100% (1/1)
2.53	12	1	aldosterone	10	AGT,Ccl2,CCL2,CD68,CYBB,LGALS3,PHLDA1,PLAUR,SERPINE1,SPP1	1	Binding of tumor cell lines	100% (1/1)
2.53	12	1	aldosterone	10	AGT,Ccl2,CCL2,CD68,CYBB,LGALS3,PHLDA1,PLAUR,SERPINE1,SPP1	1	Interaction of tumor cell lines	100% (1/1)
2.53	12	1	NCOA3	10	CCNE1,CDC6,HK2,HMOX1,IGF1,IGFBP3,MMP9,Muc1,SLC16A3,SLC2A1	1	Growth of lesion	100% (1/1)
2.5	6	1	P2RX4	4	Ccl2,CXCL2,CXCL3,MMP9	1	Migration of cells	100% (1/1)
2.5	6	1	ADORA1	4	CCL17,MMP12,MMP9,PENK	1	Cell movement of granulocytes	100% (1/1)
2.5	6	1	ADORA1	4	CCL17,MMP12,MMP9,PENK	1	Cell movement of myeloid cells	100% (1/1)
2.5	6	1	IGF1	4	CCL4,CD44,SLC2A1,SPP1	1	Migration of hepatic stellate cells	100% (1/1)
2.5	6	1	CTSB	4	CXCL2,CXCL3,CYBB,PLAUR	1	Cell movement of granulocytes	100% (1/1)
2.5	6	1	FCGR2A	4	CCL2,CCL4,CXCL3,IL18	1	Degranulation of leukocytes	100% (1/1)
2.496	15	1	Bay 11-7082	13	Ccl2,CCL2,CCL3L3,CCL4,Ccl7,CXCL2,CXCL3,F3,GJA1,HMOX1,IL18,SOD2,TLR2	1	Ion homeostasis of cells	0% (0/1)
2.475	10	1	vancomycin	8	C3,C4A/C4B,CD14,CD44,FCGR2A,HMOX1,LCN2,LGALS3	1	Engulfment of phagocytes	0% (0/1)
2.475	10	1	vancomycin	8	C3,C4A/C4B,CD14,CD44,FCGR2A,HMOX1,LCN2,LGALS3	1	Engulfment of myeloid cells	0% (0/1)
2.475	10	1	NADPH oxidase	8	CCL2,CYBB,F3,HMOX1,MMP12,MMP9,NCF1,SERPINE1	1	Cell movement of myeloid cells	0% (0/1)
2.475	10	1	OLR1	8	CCL2,CYBA,CYBB,ITGAM,NCF1,SPP1,TGFBR1,TGFBR3	1	Vasculogenesis	100% (1/1)
2.475	10	1	caffeic acid phenethyl ester	8	Ccl2,CD44,CD83,CXCL10,CXCL3,F3,HMOX1,TLR2	1	Activation of blood cells	100% (1/1)
2.475	10	1	ARVib-7	8	BUB1B,CCNA2,CDKN2A,ESPL1,KIF22,MAD2L1,NUSAP1,UBE2C	1	Organismal death	0% (0/1)
2.475	10	1	LEP	8	CCL2,CCL3L3,CD63,CYBB,IL18,ITGAM,P2RX4,SPI1	1	Degranulation	100% (1/1)
2.475	10	1	IL23A	8	Ccl2,CLEC5A,CXCL10,CXCL13,HP,S100A8,S100A9,TBX21	1	Cell movement of leukocytes	100% (1/1)
2.475	10	1	eplerenone	8	Ccl2,CYBA,CYBB,LGALS3,MMP9,NCF1,SERPINE1,SPP1	1	Vasculogenesis	100% (1/1)
2.475	10	1	ABCB4	8	Ccl2,CXCL10,LGALS3,MMP9,SERPINE1,SPP1,STING1,TIMP1	1	Cell movement of myeloid cells	100% (1/1)
2.475	10	1	thioacetamide	8	CD14,CD44,ELF3,FCGR2A,LCN2,LGALS1,LGALS3,STING1	1	Immune response of cells	0% (0/1)
2.475	10	1	kainic acid	8	APOE,Ccl2,CCL3L3,CD44,GJA1,IGF1,MMP9,SPP1	1	Transmigration of cells	0% (0/1)
2.475	10	1	ADA	8	CCL11,Ccl2,CXCL2,CXCL3,MMP12,MMP9,SPP1,TIMP1	1	Cellular infiltration by granulocytes	0% (0/1)
2.475	10	1	RET	8	Ccl2,CCL2,MMP14,MMP7,MMP9,PLAU,PLAUR,S100A9	1	Migration of myeloid cells	0% (0/1)
2.475	10	1	semaxinib	8	CCL22,CCL3L3,CHI3L1,CXCL10,CXCL11,CXCL13,CXCL3,ORM1	1	Quantity of Ca2+	0% (0/1)
2.475	10	1	EIF4E	8	C3AR1,CAPG,Ccl2,CYBA,CYBB,HMOX1,PLAUR,SLC11A1	1	Phagocytosis	100% (1/1)
2.475	10	1	carrageenan	8	Ccl2,CCL3L3,CXCL2,CXCL3,EGR2,ESR1,FOSB,PTGES	1	Cell movement	100% (1/1)
2.475	10	1	ARVib-31	8	BUB1B,CCNA2,CDKN2A,ESPL1,KIF22,MAD2L1,NUSAP1,UBE2C	1	Organismal death	0% (0/1)
2.475	10	1	ZNF106	8	C3,C4A/C4B,CXCL10,LGALS1,LGALS3,LYZ,S100A8,SLC11A1	1	Inflammatory response	0% (0/1)
2.475	10	1	NOX4	8	AGT,Ccl2,CCL2,CD44,CYBB,HMOX1,NCF1,SERPINE1	1	Cell movement of myeloid cells	0% (0/1)
2.475	10	1	NOX4	8	AGT,Ccl2,CCL2,CD44,CYBB,HMOX1,NCF1,SERPINE1	1	Cell movement of phagocytes	0% (0/1)
2.475	10	1	TP73	8	C3,Ccl2,CXCL10,CXCL2,CXCL3,ITGB2,SPP1,TIMP1	1	Cellular infiltration by granulocytes	0% (0/1)
2.475	10	1	STAT4	8	C3,CCL2,CXCL10,CXCL2,CXCL3,SERPINB1,SERPINE1,TIMP1	1	Cell movement of neutrophils	0% (0/1)
2.475	10	1	STAT4	8	C3,CCL2,CXCL10,CXCL2,CXCL3,GJA1,NDRG1,TIMP1	1	Cellular infiltration by myeloid cells	0% (0/1)
2.475	10	1	STAT4	8	C3,CCL2,CXCL10,CXCL2,CXCL3,GJA1,NDRG1,TIMP1	1	Cellular infiltration by phagocytes	0% (0/1)
2.475	10	1	phenylbutazone	8	C4A/C4B,CD44,FCGR2A,LCN2,LGALS3,SPP1,STING1,TIMP1	1	Cell movement of myeloid cells	0% (0/1)
2.475	10	1	HMGB1	8	CCL2,CCL4,CD80,CD83,CD86,IRF5,PLA2G2A,TLR2	1	Activation of T lymphocytes	100% (1/1)
2.475	10	1	STING1	8	C6,CXCL10,CXCL3,IL18,ITGAM,LCN2,PLAUR,THBS1	1	Response of granulocytes	0% (0/1)
2.475	10	1	STING1	8	C6,CXCL10,CXCL3,IL18,ITGAM,LCN2,PLAUR,THBS1	1	Response of neutrophils	0% (0/1)
2.46	22	1	NFAT5	20	ACTN2,AREG,Ccl2,CCL2,CD44,CD74,CXCL10,CXCL3,CYBB,EREG,F3,HLA-DQA1,HLA-DQB1,HLA-DRB5,IL1RN,LCN2,PTGES,RRM2,SPP1,TLR2	1	Neoplasia of cells	100% (1/1)
2.449	8	1	MLN120B	6	ACP5,Ccl2,CTSB,CTSK,CXCL2,CXCL6	1	Migration of cells	100% (1/1)
2.449	8	1	TAC1	6	Ccl2,CCL2,CCL4,CXCL10,CXCL3,SERPINE1	1	Chemotaxis of phagocytes	100% (1/1)
2.449	8	1	TAC1	6	Ccl2,CCL2,CCL4,CXCL10,CXCL3,SERPINE1	1	Homing of leukocytes	100% (1/1)
2.449	8	1	TAC1	6	Ccl2,CCL2,CCL4,CXCL10,CXCL3,SERPINE1	1	Chemotaxis of myeloid cells	100% (1/1)
2.449	8	1	TLN1	6	Ccl2,CCL4,CD14,CXCL10,ITGAM,MMP9	1	Activation of phagocytes	0% (0/1)
2.449	8	1	TLN1	6	Ccl2,CCL4,CD14,CXCL10,ITGAM,MMP9	1	Recruitment of phagocytes	0% (0/1)
2.449	8	1	TLN1	6	Ccl2,CCL4,CD14,CXCL10,ITGAM,MMP9	1	Activation of myeloid cells	0% (0/1)
2.449	8	1	TLN1	6	Ccl2,CCL4,CD14,CXCL10,ITGAM,MMP9	1	Recruitment of myeloid cells	0% (0/1)
2.449	8	1	icilin	6	Ccl2,CCL3L3,CCL4,CXCL10,CXCL2,IL12B	1	Chemotaxis of phagocytes	0% (0/1)
2.449	8	1	icilin	6	Ccl2,CCL3L3,CCL4,CXCL10,CXCL2,IL12B	1	Quantity of leukocytes	0% (0/1)
2.449	8	1	icilin	6	Ccl2,CCL3L3,CCL4,CXCL10,CXCL2,IL12B	1	Chemotaxis of leukocytes	0% (0/1)
2.449	8	1	icilin	6	Ccl2,CCL3L3,CCL4,CXCL10,CXCL2,IL12B	1	Cell movement of eosinophils	0% (0/1)
2.449	8	1	icilin	6	Ccl2,CCL3L3,CCL4,CXCL10,CXCL2,IL12B	1	Chemotaxis of myeloid cells	0% (0/1)
2.449	8	1	icilin	6	Ccl2,CCL3L3,CCL4,CXCL10,CXCL2,IL12B	1	Cellular infiltration by leukocytes	0% (0/1)
2.449	8	1	icilin	6	Ccl2,CCL3L3,CCL4,CXCL10,CXCL2,IL12B	1	Homing of leukocytes	0% (0/1)
2.449	8	1	icilin	6	Ccl2,CCL3L3,CCL4,CXCL10,CXCL2,IL12B	1	Migration of phagocytes	0% (0/1)
2.449	8	1	NFkB (family)	6	CCL2,CCL4,CXCL10,IL18,MMP9,TIMP1	1	Cell movement of neutrophils	0% (0/1)
2.449	8	1	NFkB (family)	6	CCL2,CCL4,CXCL10,IL18,MMP9,TIMP1	1	Cellular infiltration by myeloid cells	0% (0/1)
2.449	8	1	NFkB (family)	6	CCL2,CCL4,CXCL10,IL18,MMP9,TIMP1	1	Cellular infiltration by phagocytes	0% (0/1)
2.449	8	1	Ni2+	6	CCL2,CX3CL1,CXCL2,CXCL3,CXCL6,NDRG1	1	Cell movement of phagocytes	0% (0/1)
2.449	8	1	Ni2+	6	CCL2,CX3CL1,CXCL2,CXCL3,CXCL6,NDRG1	1	Cell movement of myeloid cells	0% (0/1)
2.449	8	1	GPS2	6	Ccl2,CCL3L3,CCL4,CXCL10,CXCL2,IL12B	1	Migration of phagocytes	0% (0/1)
2.449	8	1	GPS2	6	Ccl2,CCL3L3,CCL4,CXCL10,CXCL2,IL12B	1	Cell movement of eosinophils	0% (0/1)
2.449	8	1	F3	6	Ccl2,CCL2,GJA1,ITGAM,MMP9,SERPINE1	1	Transmigration of cells	100% (1/1)
2.449	8	1	CDH1	6	CCL17,CD44,IGFBP3,MMP14,MMP9,PLAUR	1	Migration of myeloid cells	0% (0/1)
2.449	8	1	CpG ODN 2395	6	Ccl2,CCL3L3,CCL4,CD86,HMOX1,IL12B	1	Quantity of leukocytes	0% (0/1)
2.449	8	1	CCR1	6	CCL11,Ccl2,CCL3L3,CTSS,ITGAM,MMP9	1	Transmigration of blood cells	100% (1/1)
2.449	8	1	oxazolone	6	Ccl2,CXCL10,CXCL3,IL12B,IL18,S100A8	1	Immune response of cells	0% (0/1)
2.449	8	1	oxazolone	6	Ccl2,CXCL10,CXCL3,IL12B,IL18,S100A8	1	Cell movement of macrophages	0% (0/1)
2.449	8	1	oxazolone	6	Ccl2,CXCL10,CXCL3,IL12B,IL18,S100A8	1	Accumulation of leukocytes	0% (0/1)
2.449	8	1	oxazolone	6	Ccl2,CXCL10,CXCL3,IL12B,IL18,S100A8	1	Migration of phagocytes	100% (1/1)
2.449	8	1	oxazolone	6	Ccl2,CXCL10,CXCL3,IL12B,IL18,S100A8	1	Migration of antigen presenting cells	100% (1/1)
2.449	8	1	prexasertib	6	C3,HMOX1,MMP9,OSM,SERPINE1,TNFRSF9	1	Cell movement of myeloid cells	0% (0/1)
2.449	8	1	prexasertib	6	C3,HMOX1,MMP9,OSM,SERPINE1,TNFRSF9	1	Cell movement of phagocytes	0% (0/1)
2.449	8	1	STAT3	6	F3,HMOX1,SERPINE1,SOD2,SPI1,SPP1	1	Increased Levels of Hematocrit	0% (0/1)
2.449	8	1	laminaran	6	CCL4,CLEC4E,CRLF2,CXCL10,INHBA,TNFRSF9	1	Activation of phagocytes	0% (0/1)
2.449	8	1	laminaran	6	CCL4,CLEC4E,CRLF2,CXCL10,INHBA,TNFRSF9	1	Cell movement of myeloid cells	0% (0/1)
2.449	8	1	laminaran	6	CCL4,CLEC4E,CRLF2,CXCL10,INHBA,TNFRSF9	1	Activation of myeloid cells	0% (0/1)
2.449	8	1	MEOX2	6	CCL2,CXCL2,CXCL3,CXCL6,F3,MMP14	1	Migration of myeloid cells	0% (0/1)
2.449	8	1	ethionine	6	C4A/C4B,CD14,CD44,LCN2,LGALS3,SPP1	1	Activation of phagocytes	0% (0/1)
2.449	8	1	ethionine	6	C4A/C4B,CD14,CD44,LCN2,LGALS3,SPP1	1	Activation of myeloid cells	0% (0/1)
2.449	8	1	TNIP1	6	CD4,CXCL2,CXCL3,LCN2,S100A8,S100A9	1	Cell movement of leukocytes	100% (1/1)
2.449	8	1	TNIP1	6	CD4,CXCL2,CXCL3,LCN2,S100A8,S100A9	1	Inflammatory response	100% (1/1)
2.449	8	1	CEBPA	6	CPB2,HMOX1,SERPINE1,SOD2,SPI1,SPP1	1	Increased Levels of Hematocrit	100% (1/1)
2.449	8	1	LIF	6	AREG,Ccl2,CCL3L3,CXCL10,REG3A,SPP1	1	Cell movement of macrophages	0% (0/1)
2.449	8	1	cytarabine	6	CCL3L3,CD80,CD86,TLR1,TLR2,TOP2A	1	Activation of cells	100% (1/1)
2.449	8	1	MAP3K1	6	HMOX1,PLAU,PLAUR,SERPINE1,THBS1,TIMP1	1	Cell movement of myeloid cells	0% (0/1)
2.449	8	1	TRIM3	6	CCL1,CXCL3,CXCL6,MMP12,MMP7,MMP9	1	Migration of phagocytes	0% (0/1)
2.449	8	1	TRIM3	6	CCL1,CXCL3,CXCL6,MMP12,MMP7,MMP9	1	Cell movement of myeloid cells	0% (0/1)
2.449	8	1	IL12 (family)	6	CCL4,CD4,CD44,CD80,CD86,TNFRSF9	1	Adhesion of immune cells	100% (1/1)
2.449	8	1	IL12 (family)	6	CCL4,CD4,CD44,CD80,CD86,TNFRSF9	1	Adhesion of blood cells	100% (1/1)
2.449	8	1	CCL20	6	C3,C3AR1,CYBB,FCGR1A,HAVCR2,ITGAM	1	Degranulation	0% (0/1)
2.449	8	1	CFB	6	ARG1,C3,C4A/C4B,C5AR1,CXCL3,ITGAM	1	Activation of phagocytes	0% (0/1)
2.449	8	1	CFB	6	ARG1,C3,C4A/C4B,C5AR1,CXCL3,ITGAM	1	Activation of myeloid cells	0% (0/1)
2.449	8	1	CFB	6	C3,C3AR1,C4A/C4B,C5AR1,CXCL3,ITGAM	1	Degranulation of cells	0% (0/1)
2.449	8	1	apigenin	6	Ccl2,CCL2,CCL3L3,CCL4,CXCL3,MMP9	1	Lymphocyte migration	0% (0/1)
2.449	8	1	apigenin	6	Ccl2,CCL2,CCL3L3,CCL4,CXCL3,MMP9	1	Migration of lymphatic system cells	0% (0/1)
2.449	8	1	apigenin	6	Ccl2,CCL2,CCL3L3,CCL4,CXCL3,MMP9	1	Transmigration of blood cells	0% (0/1)
2.449	8	1	IL1B	6	CCL2,CCL4,CD44,IGF1,SLC2A1,SPP1	1	Migration of hepatic stellate cells	0% (0/1)
2.449	8	1	ARRB2	6	ADRA2A,Ccl2,CXCL2,CXCL3,F3,SERPINE1	1	Migration of cells	100% (1/1)
2.449	8	1	ZC3H12A	6	Ccl2,CCL2,CTSS,FCGR2B,IL12B,LCN2	1	Immune response of leukocytes	0% (0/1)
2.449	8	1	cephaloridine	6	CCL17,CD72,CXCL10,CXCL13,HMOX1,MMP12	1	Cell movement of phagocytes	0% (0/1)
2.449	8	1	deferoxamine	6	CCL3L3,CCL4,HMOX1,ITGAM,SERPINE1,SPP1	1	Migration of antigen presenting cells	0% (0/1)
2.449	8	1	MAPK7	6	BCL2A1,CXCL10,CXCL2,CXCL3,HMOX1,IL12B	1	Accumulation of cells	0% (0/1)
2.449	8	1	sodium chloride	6	Ccl2,CYBA,CYBB,HMOX1,PTGES,SPP1	1	Growth of tumor	0% (0/1)
2.449	8	1	N4BP1	6	CCL3L3,CCL4,CXCL2,CXCL6,IL12B,TP73	1	Migration of cells	0% (0/1)
2.449	8	1	RIPK2	6	Ccl2,CLEC4E,CXCL10,CXCL2,CXCL3,PTGES	1	Cellular infiltration by myeloid cells	0% (0/1)
2.449	8	1	RIPK2	6	Ccl2,CD86,CLEC4E,CXCL10,CXCL2,CXCL3	1	Accumulation of cells	0% (0/1)
2.449	8	1	ADORA3	6	CCL1,CCL2,CCL4,CXCL3,IL24,SPP1	1	Cell movement of phagocytes	100% (1/1)
2.449	8	1	ADORA3	6	CCL1,CCL2,CCL4,CXCL3,IL24,SPP1	1	Activation of phagocytes	0% (0/1)
2.449	8	1	ADORA3	6	CCL1,CCL2,CCL4,CXCL3,IL24,SPP1	1	Cell movement of myeloid cells	0% (0/1)
2.449	8	1	ADORA3	6	CCL1,CCL2,CCL4,CXCL3,IL24,SPP1	1	Cell movement of antigen presenting cells	100% (1/1)
2.449	8	1	ADORA3	6	CCL1,CCL2,CCL4,CXCL3,IL24,SPP1	1	Activation of myeloid cells	0% (0/1)
2.449	8	1	NFKBIZ	6	Ccl2,CCL3L3,CXCL3,LCN2,S100A8,S100A9	1	Cell movement of neutrophils	100% (1/1)
2.449	8	1	NFKBIZ	6	Ccl2,CCL3L3,CXCL3,LCN2,S100A8,S100A9	1	Chemotaxis of granulocytes	0% (0/1)
2.449	8	1	IL27RA	6	Ccl2,CCL4,CXCL10,CXCL13,IL12B,LCN2	1	Chemotaxis of leukocytes	0% (0/1)
2.449	8	1	NCSTN	6	CD14,CSF2RB,FCGR2A,FCGR2B,Ly6a (includes others),SPI1	1	Binding of leukocytes	0% (0/1)
2.449	8	1	fisetin	6	Ccl2,CCL3L3,CTSK,IL12B,MMP9,TNFRSF11A	1	Migration of cells	100% (1/1)
2.449	8	1	SASH1	6	CCL4,CXCL10,IL12B,IL18,INHBA,TNFSF8	1	Quantity of blood cells	0% (0/1)
2.449	8	1	SASH1	6	CCL4,CXCL10,IL12B,IL18,INHBA,TNFSF8	1	Cell movement of myeloid cells	0% (0/1)
2.449	8	1	CD38	6	CCL22,CD44,CD86,CSF2RB,LGALS3,THY1	1	Adhesion of immune cells	100% (1/1)
2.449	8	1	CD38	6	CCL22,CD44,CD86,CSF2RB,LGALS3,THY1	1	Adhesion of blood cells	100% (1/1)
2.449	8	1	NCF1	6	Ccl2,CD44,F3,HMOX1,IGF1,SERPINE1	1	Growth of tumor	0% (0/1)
2.449	8	1	NCF1	6	Ccl2,CD14,CD44,F3,HMOX1,SERPINE1	1	Cell movement of myeloid cells	100% (1/1)
2.449	8	1	NGF	6	ATF3,CCL4,CD80,CD86,HMOX1,MMP9	1	Activation of antigen presenting cells	0% (0/1)
2.449	8	1	TNFSF11	6	CCL2,CCL4,CD44,IGF1,SLC2A1,SPP1	1	Migration of hepatic stellate cells	0% (0/1)
2.449	8	1	SELP	6	CCL4,CXCL2,HCK,IGF1,IL1R2,PLAUR	1	Synthesis of reactive oxygen species	100% (1/1)
2.449	8	1	CHRNA7	6	CCL1,Ccl2,CXCL10,CXCL2,CXCL3,ITGAM	1	Binding of leukocytes	0% (0/1)
2.449	8	1	CHRNA7	6	CCL1,Ccl2,CXCL10,CXCL2,CXCL3,ITGAM	1	Adhesion of blood cells	0% (0/1)
2.449	8	1	DOCK8	6	CCL4,CXCL10,IL12B,IL18,INHBA,TNFSF8	1	Cell movement of myeloid cells	0% (0/1)
2.449	8	1	lipopolysaccharide	6	C3,C3AR1,C5AR1,CD44,THBS1,TLR2	1	Reperfusion injury of kidney	0% (0/1)
2.449	8	1	FN1	6	CCL2,CCL4,CXCL3,ITGAM,PLAUR,TLR2	1	Degranulation of myeloid cells	0% (0/1)
2.449	8	1	CCL5	6	CCL2,CCL3L3,CCL4,CXCL3,ITGAM,PLAUR	1	Degranulation of myeloid cells	0% (0/1)
2.449	8	1	SELPLG	6	CCL2,CCL4,HAVCR2,HCK,ITGAM,PLAUR	1	Degranulation of myeloid cells	0% (0/1)
2.449	8	1	FN1	6	CCL2,CCL4,CXCL3,ITGAM,PLAUR,TLR2	1	Degranulation of phagocytes	0% (0/1)
2.449	8	1	CCL5	6	CCL2,CCL3L3,CCL4,CXCL3,ITGAM,PLAUR	1	Degranulation of phagocytes	0% (0/1)
2.449	8	1	SELPLG	6	CCL2,CCL4,HAVCR2,HCK,ITGAM,PLAUR	1	Degranulation of phagocytes	0% (0/1)
2.412	13	1	TCR	11	APOE,CCL1,CCL17,CCL22,CCL3L3,CCL4,CD44,CXCL10,CXCL11,CXCL13,SPP1	1	Migration of phagocytes	0% (0/1)
2.412	13	1	PARP1	11	CCL1,Ccl2,CCL4,CD80,CD86,CXCL10,CXCL3,HMOX1,IGF1,MMP9,TLR1	1	Activation of myeloid cells	0% (0/1)
2.412	13	1	ZBTB10	11	CARD9,CCL1,CCL4,CD80,CD86,CLEC5A,CX3CL1,CXCL10,CXCL3,CYBB,IL1RN	1	Activation of phagocytes	0% (0/1)
2.333	11	1	LDL	9	C3,Ccl2,CCL2,CCL4,CXCL10,CXCL2,CXCL3,CXCL6,S100A8	1	Chemotaxis of granulocytes	0% (0/1)
2.333	11	1	Fibrinogen	9	Ccl2,CCL2,CCL3L3,CCL4,CXCL3,F3,ITGAM,MMP14,TLR2	1	Migration of myeloid cells	100% (1/1)
2.333	11	1	Fibrinogen	9	Ccl2,CCL2,CCL3L3,CCL4,CXCL3,F3,ITGAM,MMP14,TLR2	1	Transmigration of cells	100% (1/1)
2.333	11	1	TNFSF13B	9	CCL2,CCL4,CD177,CD74,CD86,CTSS,F3,MMP9,SPP1	1	Transmigration of cells	0% (0/1)
2.333	11	1	TNFSF13B	9	CCL2,CCL4,CD177,CTSS,CXCL6,F3,MMP9,PLAUR,SPP1	1	Migration of myeloid cells	0% (0/1)
2.333	11	1	AR	9	C3,CCL11,CCL17,Ccl2,CCL3L3,MMP9,PLAU,SPP1,THBS1	1	Accumulation of myeloid cells	0% (0/1)
2.333	11	1	IFN alpha/beta	9	CCL2,CD80,CD83,CD86,CXCL10,TLR1,TLR2,TNFSF13,TREM1	1	Activation of mononuclear leukocytes	100% (1/1)
2.333	11	1	IRF8	9	APOE,CD14,CTSS,CXCL10,IL18,ITGAM,MAFB,MMP9,MSR1	1	Atherosclerosis	0% (0/1)
2.333	11	1	IL1A	9	C3,CCL11,Ccl2,CCL2,CCL4,CXCL10,CXCL2,IL12B,IL18	1	Cell movement of eosinophils	0% (0/1)
2.333	11	1	ABCA1	9	APOE,Ccl2,CCL3L3,CXCL3,IL12B,MMP9,PPARGC1A,SFTPD,SLC2A1	1	Migration of cells	100% (1/1)
2.333	11	1	Nr1h	9	APOE,Ccl2,CCL2,CCL3L3,CXCL10,HCK,IL12B,PTGES,THBS1	1	Chemotaxis of macrophages	0% (0/1)
2.333	11	1	THRB	9	CCL17,Ccl2,CCL2,CXCL10,CXCL2,CXCL3,MMP7,MMP9,SPP1	1	Accumulation of granulocytes	0% (0/1)
2.333	11	1	LGALS3	9	Ccl2,CCL2,CCL3L3,CXCL2,FABP4,IGF1,ITGAM,MSR1,SPP1	1	Atherosclerosis	100% (1/1)
2.333	11	1	C3	9	APOE,C3AR1,C5AR1,CCL2,CCL3L3,CCL4,Ccl9,IL12B,TIMP1	1	Differentiation of connective tissue cells	100% (1/1)
2.324	17	1	dihydrotestosterone	15	AGT,APOE,ARG1,C4A/C4B,CD63,CHI3L1,CX3CL1,CYBB,GRN,IGF1,MMP9,NDRG1,Retnla,SPP1,THBS1	1	Activation of phagocytes	0% (0/1)
2.324	17	1	dihydrotestosterone	15	AGT,APOE,ARG1,C4A/C4B,CD63,CHI3L1,CX3CL1,CYBB,GRN,IGF1,MMP9,NDRG1,Retnla,SPP1,THBS1	1	Activation of myeloid cells	0% (0/1)
2.309	5	1	BTK	3	CXCL10,HMOX1,SPI1	1	Phagocytosis of phagocytes	100% (1/1)
2.309	5	1	BTK	3	CCL4,CXCL10,CXCL3	1	Mobilization of Ca2+	100% (1/1)
2.309	5	1	BTK	3	CXCL10,HMOX1,SPI1	1	Phagocytosis of myeloid cells	100% (1/1)
2.309	14	1	PTGS1	12	ARG1,ATF3,ATP8A1,Ccl2,CFTR,CYBB,FABP4,GJA1,MMP9,NCF1,PTGES,TNFRSF9	1	Migration of cells	0% (0/1)
2.309	14	1	CSF1	12	C5AR1,Ccl2,CCL2,CXCL10,CXCL2,CXCL3,FCGR2A,IL18,IRF5,ITGAM,MMP9,SPP1	1	Accumulation of neutrophils	0% (0/1)
2.309	5	1	ITGAM	3	C5AR1,CCL3L3,CXCL10	1	Lung injury	100% (1/1)
2.294	21	1	resiquimod	19	C3,C3AR1,C4A/C4B,Ccl2,CCL2,CCL3L3,CCL4,CD44,CXCL10,CXCL2,CXCL3,FCGR2A,HCK,IL18,PLAU,PTX3,SPI1,SPP1,TLR2	1	Cell movement of neutrophils	100% (1/1)
2.268	9	1	GABARAPL2	7	CSTB,CTSB,FOLR1,HEXA,NAGLU,NPC2,PSAP	1	Organismal death	0% (0/1)
2.268	9	1	IL6	7	AGT,CCL2,CCL4,CD44,IGF1,LGALS1,SPP1	1	Migration of hepatic stellate cells	0% (0/1)
2.268	9	1	PLG	7	CCL2,F3,IL1RL1,MMP12,MMP9,PLAU,SERPINE1	1	Cell movement of granulocytes	100% (1/1)
2.268	9	1	TREM1	7	CCL17,Ccl2,CXCL10,CXCL2,CXCL3,F3,SPP1	1	Accumulation of granulocytes	0% (0/1)
2.268	9	1	IL17A	7	C3,CCL2,CCL4,Ccl7,CXCL3,S100A9,TLR2	1	Degranulation of phagocytes	0% (0/1)
2.268	9	1	IL17A	7	C3,CCL2,CCL4,Ccl7,CXCL3,S100A9,TLR2	1	Degranulation of myeloid cells	0% (0/1)
2.268	9	1	CASR	7	BUB1B,CD44,CENPA,IGFBP3,LGALS1,S100A9,TLR2	1	Growth of tumor	100% (1/1)
2.268	9	1	Nfat (family)	7	CCL2,CCL3L3,CTSK,CX3CL1,CYBB,FABP4,SERPINE1	1	Cell movement of myeloid cells	0% (0/1)
2.268	9	1	Nfat (family)	7	CCL2,CCL3L3,CTSK,CX3CL1,CYBB,FABP4,SERPINE1	1	Cell movement of phagocytes	0% (0/1)
2.268	9	1	FGF2	7	Ccl2,CCL2,CXCL2,F3,MMP9,S100A8,SPP1	1	Accumulation of neutrophils	0% (0/1)
2.268	9	1	NOD2	7	AREG,CCL2,CXCL10,CXCL2,IL12B,IL18,TNFRSF9	1	Cell movement of eosinophils	0% (0/1)
2.268	9	1	GABARAP	7	CSTB,CTSB,FOLR1,HEXA,NAGLU,NPC2,PSAP	1	Organismal death	100% (1/1)
2.268	9	1	CARD9	7	C3,C5AR1,CLEC4E,CXCL10,CXCL3,IL12B,TLR2	1	Stimulation of cells	0% (0/1)
2.268	9	1	UTP	7	Ccl2,CCL2,CD14,F3,SERPINE1,SPP1,THBS1	1	Recruitment of phagocytes	0% (0/1)
2.268	9	1	UTP	7	Ccl2,CCL2,CD14,F3,SERPINE1,SPP1,THBS1	1	Cell movement of myeloid cells	100% (1/1)
2.268	9	1	UTP	7	Ccl2,CCL2,CD14,F3,SERPINE1,SPP1,THBS1	1	Recruitment of myeloid cells	0% (0/1)
2.268	9	1	UTP	7	Ccl2,CCL2,CD14,F3,SERPINE1,SPP1,THBS1	1	Binding of tumor cell lines	100% (1/1)
2.268	9	1	aflatoxin B1	7	CX3CL1,CXCL13,GJA1,HLA-DQB1,MMP12,SPP1,TNFRSF9	1	Migration of antigen presenting cells	0% (0/1)
2.268	9	1	infliximab	7	CCL17,Ccl2,FCGR2A,INHBA,MMP12,PTGES,TNFRSF9	1	Cell movement of myeloid cells	100% (1/1)
2.268	9	1	infliximab	7	CCL17,Ccl2,FCGR2A,INHBA,MMP12,PTGES,TNFRSF9	1	Cell movement of phagocytes	100% (1/1)
2.268	9	1	hyaluronic acid	7	CCL3L3,CCL4,CD44,CXCL10,CXCL2,CXCL3,TLR2	1	Mobilization of Ca2+	100% (1/1)
2.268	9	1	hyaluronic acid	7	Ccl2,CCL3L3,CCL4,CXCL10,CXCL2,CXCL3,SPP1	1	Chemotaxis of granulocytes	0% (0/1)
2.268	9	1	TSC2	7	Ccl2,CTSK,CXCL10,GSN,HMOX1,LGALS3,PLAU	1	Cell movement of macrophages	0% (0/1)
2.268	9	1	PD98059	7	AGT,CCL2,CCL4,CD44,IGF1,SLC2A1,SPP1	1	Migration of hepatic stellate cells	0% (0/1)
2.268	9	1	HIF1A	7	AGT,CCL2,CCL4,CD44,IGF1,LGALS1,SLC2A1	1	Migration of hepatic stellate cells	0% (0/1)
2.268	9	1	D-galactosamine	7	CD14,CTSB,CXCL10,CXCL2,IL12B,IL18,TIMP1	1	Cell movement of granulocytes	100% (1/1)
2.268	9	1	EP400	7	CCNA2,CCNF,CDKN2A,E2F8,MYBL2,TBX21,UHRF1	1	Organismal death	100% (1/1)
2.268	9	1	CNTF	7	Ccl2,EGR2,KCNN4,LGALS3,SPP1,TIMP1,TLR2	1	Migration of mononuclear leukocytes	0% (0/1)
2.268	9	1	SPP1	7	Ccl2,CCL2,CCL3L3,CCL4,CXCL2,CXCL3,CXCL6	1	Chemotaxis of granulocytes	100% (1/1)
2.268	9	1	H89	7	Ccl2,CD80,CD86,ESR1,GJA1,IGF1,PLAU	1	Cell-cell contact	0% (0/1)
2.268	9	1	GABARAPL1	7	CSTB,CTSB,FOLR1,HEXA,NAGLU,NPC2,PSAP	1	Organismal death	0% (0/1)
2.268	9	1	ionomycin	7	BTK,CCL2,CXCL10,ITGB2,MMP9,SPP1,TLR2	1	Cell movement of neutrophils	0% (0/1)
2.268	9	1	FKBP10	7	IGF1,INHBA,MMP14,SERPINE1,SPP1,THY1,TIMP1	1	Development of head	0% (0/1)
2.268	9	1	IL1B	7	CHI3L1,CTSB,IGF1,MMP14,SLC2A1,SPP1,TIMP1	1	Proliferation of hepatic stellate cells	0% (0/1)
2.268	9	1	FKBP10	7	IGF1,INHBA,MMP14,SERPINE1,SPP1,THY1,TIMP1	1	Development of body axis	0% (0/1)
2.236	7	1	UM101	5	CCL17,CXCL10,CXCL11,MMP9,TNFSF8	1	Cell movement of leukocytes	0% (0/1)
2.236	7	1	B4GALNT1	5	C1QA,C3,C3AR1,C4A/C4B,C5AR1	1	Damage of kidney	0% (0/1)
2.236	7	1	SAFB	5	CD74,CX3CL1,CXCL10,CXCL11,S100A8	1	Binding of leukocytes	0% (0/1)
2.236	7	1	SAFB	5	CD74,CX3CL1,CXCL10,CXCL11,S100A8	1	Chemotaxis of leukocytes	0% (0/1)
2.236	7	1	SAFB	5	CD74,CX3CL1,CXCL10,CXCL11,S100A8	1	Adhesion of blood cells	0% (0/1)
2.236	7	1	1810019D21Rik	5	AREG,ITGB2,MMP9,PLAU,S100A8	1	Cell movement of macrophages	0% (0/1)
2.236	7	1	G protein alphai	5	C4A/C4B,CXCL10,FCGR2A,FCGR2B,THBS1	1	Engulfment of phagocytes	0% (0/1)
2.236	7	1	G protein alphai	5	C4A/C4B,CXCL10,FCGR2A,FCGR2B,THBS1	1	Engulfment of myeloid cells	0% (0/1)
2.236	7	1	phenacetin	5	CD44,LCN2,LGALS3,SPP1,TIMP1	1	Cell movement of granulocytes	0% (0/1)
2.236	7	1	Ttc39aos1	5	Ccl2,CCL4,Ccl7,CXCL10,Ly6a (includes others)	1	Cell movement of lymphatic system cells	0% (0/1)
2.236	7	1	diclofenac	5	AREG,IL24,ITGAM,LGALS3,SERPINE1	1	Cell movement of macrophages	0% (0/1)
2.236	7	1	diclofenac	5	AREG,IL24,ITGAM,LGALS3,SERPINE1	1	Cell movement of phagocytes	100% (1/1)
2.236	7	1	diclofenac	5	AREG,IL24,ITGAM,LGALS3,SERPINE1	1	Cell movement of antigen presenting cells	0% (0/1)
2.236	7	1	PLAT	5	CCL3L3,CXCL10,INHBA,MMP9,SERPINE1	1	Cell movement of phagocytes	100% (1/1)
2.236	7	1	PLAT	5	CCL3L3,CXCL10,INHBA,MMP9,SERPINE1	1	Activation of cells	100% (1/1)
2.236	7	1	PLAT	5	CCL3L3,CXCL10,INHBA,MMP9,SERPINE1	1	Inflammatory response	100% (1/1)
2.236	7	1	PLAT	5	CCL3L3,CXCL10,INHBA,MMP9,SERPINE1	1	Cell movement of myeloid cells	100% (1/1)
2.236	7	1	PLAT	5	CCL3L3,CXCL10,INHBA,MMP9,SERPINE1	1	Cell movement of mononuclear leukocytes	0% (0/1)
2.236	7	1	MARK2	5	Ccl7,CXCL2,CXCL3,IL12B,IL18	1	Chemotaxis of phagocytes	0% (0/1)
2.236	7	1	MARK2	5	Ccl7,CXCL2,CXCL3,IL12B,IL18	1	Chemotaxis of myeloid cells	0% (0/1)
2.236	7	1	Ifnar	5	C3,Ccl2,CCL2,CXCL10,IL12B	1	Cell movement of eosinophils	0% (0/1)
2.236	7	1	CAT	5	AIF1,Ccl2,CCL2,SERPINE1,THBS1	1	Chemotaxis of phagocytes	0% (0/1)
2.236	7	1	CAT	5	AIF1,Ccl2,CCL2,SERPINE1,THBS1	1	Chemotaxis of myeloid cells	0% (0/1)
2.236	7	1	LY294002	5	CCL2,CD44,IGF1,SLC2A1,SPP1	1	Migration of hepatic stellate cells	0% (0/1)
2.236	7	1	IL1RL2	5	CXCL10,CXCL2,MMP9,REG3A,S100A8	1	Migration of phagocytes	0% (0/1)
2.236	7	1	IL1RL2	5	CXCL10,CXCL2,MMP9,REG3A,S100A8	1	Inflammatory response	100% (1/1)
2.236	7	1	IL1RL2	5	CXCL10,CXCL2,MMP9,REG3A,S100A8	1	Cell movement of myeloid cells	0% (0/1)
2.236	7	1	TIRAP	5	CD86,CXCL10,CXCL2,CXCL3,IL12B	1	Accumulation of leukocytes	0% (0/1)
2.236	7	1	EDN1	5	CCL2,CYBB,IL18,ITGAM,PLAUR	1	Degranulation	0% (0/1)
2.236	7	1	FOXM1	5	CCL11,Ccl2,CCL4,CD44,IGF1	1	Activation of T lymphocytes	0% (0/1)
2.236	7	1	FOXM1	5	CCL11,CCL4,CD44,ESR1,PLAUR	1	Mobilization of Ca2+	0% (0/1)
2.236	7	1	IL12B	5	Ccl2,CXCL10,IL12RB1,S100A8,S100A9	1	Organismal death	100% (1/1)
2.236	7	1	IL12B	5	Ccl2,CD86,CXCL10,S100A8,S100A9	1	Accumulation of leukocytes	100% (1/1)
2.236	7	1	ITGA9	5	Ccl2,CCL3L3,CCL4,CXCL6,MMP14	1	Migration of phagocytes	0% (0/1)
2.236	7	1	ITGA9	5	Ccl2,CCL3L3,CCL4,CXCL6,MMP14	1	Activation of cells	0% (0/1)
2.236	7	1	ITGA9	5	Ccl2,CCL3L3,CCL4,CXCL6,MMP14	1	Migration of myeloid cells	0% (0/1)
2.236	7	1	ITGA9	5	Ccl2,CCL3L3,CCL4,CXCL6,MMP14	1	Chemotaxis	100% (1/1)
2.236	7	1	ITGA9	5	Ccl2,CCL3L3,CCL4,CXCL6,MMP14	1	Cell movement of lymphocytes	100% (1/1)
2.236	7	1	ITGA9	5	Ccl2,CCL3L3,CCL4,CXCL6,MMP14	1	Cell movement of lymphatic system cells	100% (1/1)
2.236	7	1	ITGA9	5	Ccl2,CCL3L3,CCL4,CXCL6,MMP14	1	Migration of mononuclear leukocytes	100% (1/1)
2.236	7	1	CYP19A1	5	CCNE1,CD44,ESR1,IGF1,TIMP1	1	Growth of connective tissue	0% (0/1)
2.236	7	1	L2HGDH	5	AIF1,CCL3L3,CCL4,CYBB,ITGAX	1	Migration of cells	0% (0/1)
2.236	7	1	carbon tetrachloride	5	Ccl2,CCL3L3,CCL4,PTAFR,RIPK3	1	Extravasation	0% (0/1)
2.236	7	1	TREM2	5	ARG1,CD86,IL12B,LGALS1,LGALS3	1	Stimulation of cells	0% (0/1)
2.236	7	1	ST8SIA1	5	C3,C3AR1,C4A/C4B,C5AR1,MMP9	1	Cell movement of phagocytes	0% (0/1)
2.236	7	1	ST8SIA1	5	C3,C3AR1,C4A/C4B,C5AR1,MMP9	1	Cell movement of myeloid cells	0% (0/1)
2.236	7	1	ST8SIA1	5	C3,C3AR1,C4A/C4B,C5AR1,MMP9	1	Recruitment of leukocytes	0% (0/1)
2.236	7	1	ST8SIA1	5	C1QA,C3,C3AR1,C4A/C4B,C5AR1	1	Damage of kidney	0% (0/1)
2.236	7	1	PTPN11	5	CYBB,FCGR2A,FCGR2B,IFI16,PIM1	1	Accumulation of cells	0% (0/1)
2.236	7	1	ITGA11	5	IGF1,MMP14,SPP1,THBS1,TIMP1	1	Organismal death	100% (1/1)
2.236	7	1	ITGA11	5	IGF1,MMP14,SPP1,THBS1,TIMP1	1	Development of head	0% (0/1)
2.236	7	1	ITGA11	5	IGF1,MMP14,SPP1,THBS1,TIMP1	1	Proliferation of muscle cells	0% (0/1)
2.236	7	1	MAC	5	AREG,CXCL2,EGR2,SPP1,THBS1	1	Cell movement of leukocytes	0% (0/1)
2.236	7	1	TRAF3	5	CXCL10,CXCL2,CXCL3,IL12B,NDRG1	1	Cellular infiltration by myeloid cells	0% (0/1)
2.236	7	1	RPL13A	5	Ccl2,CCL22,CXCL13,LCN2,S100A8	1	Cell movement of phagocytes	100% (1/1)
2.236	7	1	RPL13A	5	Ccl2,CCL22,CXCL13,LCN2,S100A8	1	Chemotaxis of leukocytes	100% (1/1)
2.236	7	1	RPL13A	5	Ccl2,CCL22,CXCL13,LCN2,S100A8	1	Chemotaxis	100% (1/1)
2.236	7	1	RPL13A	5	Ccl2,CCL22,CXCL13,LCN2,S100A8	1	Homing of leukocytes	100% (1/1)
2.236	7	1	MST1R	5	ARG1,CCL3L3,CCL4,CXCL13,CXCL3	1	Cell movement	100% (1/1)
2.236	7	1	MST1R	5	ARG1,CCL3L3,CCL4,CXCL13,CXCL3	1	Cellular homeostasis	0% (0/1)
2.236	7	1	MST1R	5	ARG1,CCL3L3,CCL4,CXCL13,CXCL3	1	Inflammatory response	100% (1/1)
2.236	7	1	PROC	5	AGT,CXCL2,CXCL3,MMP9,TLR2	1	Infiltration by neutrophils	100% (1/1)
2.236	7	1	CYP2E1	5	C3AR1,C5AR1,Ccl2,HMOX1,NCF1	1	Angiogenesis	0% (0/1)
2.236	7	1	CYP2E1	5	C3AR1,Ccl2,CD14,HMOX1,NCF1	1	Phagocytosis	0% (0/1)
2.236	7	1	EHF	5	HMOX1,PLAUR,S100A8,S100A9,SERPINE1	1	Migration of myeloid cells	0% (0/1)
2.236	7	1	U0126	5	F3,HMOX1,SERPINE1,SOD2,SPP1	1	Increased Levels of Hematocrit	0% (0/1)
2.236	7	1	inosine	5	C2,C3,C4A/C4B,CFD,TIMP1	1	Infiltration by neutrophils	0% (0/1)
2.236	7	1	GW3965	5	APOE,Ccl2,CXCL10,IL12B,MMP9	1	Quantity of macrophages	0% (0/1)
2.236	22	1	HRAS	20	Ccl2,CD44,CTSS,CTSZ,CXCL10,CXCL11,CXCL2,CXCL3,GJA1,HMOX1,ITGAM,MMP12,MMP14,MMP9,PLAU,PLAUR,SERPINE1,SPP1,TIMP1,VCAN	1	Migration of phagocytes	0% (0/1)
2.236	7	1	nitroarginine	5	CCL2,Ccl9,CD44,HMOX1,SPP1	1	Migration of phagocytes	100% (1/1)
2.236	7	1	telaglenastat	5	ARG1,CCL22,ITGB2,MMP9,Retnla	1	Cell movement	100% (1/1)
2.236	7	1	telaglenastat	5	ARG1,CCL22,ITGB2,MMP9,Retnla	1	Activation of phagocytes	0% (0/1)
2.236	7	1	telaglenastat	5	ARG1,CCL22,ITGB2,MMP9,Retnla	1	Activation of myeloid cells	0% (0/1)
2.236	7	1	KLF5	5	ARG1,CD44,MMP9,PTGES,S100A9	1	Cellular infiltration	0% (0/1)
2.236	7	1	Ccl6	5	Ccl2,CCL3L3,CTSK,CTSS,MMP9	1	Cell movement of phagocytes	0% (0/1)
2.236	7	1	Ccl6	5	Ccl2,CCL3L3,CTSK,CTSS,MMP9	1	Cell movement of myeloid cells	0% (0/1)
2.236	7	1	IFNA1/IFNA13	5	CD80,CD83,CD86,CXCL10,SIGLEC1	1	Activation of leukocytes	100% (1/1)
2.236	7	1	Angiotensin II receptor type 1	5	CCL2,CCL3L3,CXCL10,SERPINE1,TIMP1	1	Cell movement of neutrophils	0% (0/1)
2.236	7	1	AGER	5	Ccl2,CCL2,CCL3L3,CCL4,SCG2	1	Chemotaxis of antigen presenting cells	0% (0/1)
2.236	7	1	resatorvid	5	Ccl2,CCL2,CXCL3,MMP9,SLC2A1	1	Metastasis	0% (0/1)
2.236	7	1	resatorvid	5	Ccl2,CCL2,CXCL3,MMP9,SLC2A1	1	Advanced malignant tumor	0% (0/1)
2.236	7	1	SOST	5	Ccl2,CCL3L3,CCL4,FABP4,PPARGC1A	1	Inflammatory response	0% (0/1)
2.236	7	1	PTPRJ	5	CCL4,CXCL2,CXCL3,IL18,TNFSF8	1	Cellular infiltration by myeloid cells	0% (0/1)
2.236	7	1	PTPRJ	5	CCL3L3,CCL4,CXCL2,CXCL3,IL18	1	Cell movement of neutrophils	0% (0/1)
2.236	7	1	PTPRJ	5	CCL3L3,CCL4,Ccl7,CXCL3,IL18	1	Flux of Ca2+	0% (0/1)
2.236	7	1	miR-146a-5p (and other miRNAs w/seed GAGAACU)	5	CCL2,CXCL3,IRF5,LBP,SFTPD	1	Cell movement of phagocytes	100% (1/1)
2.236	7	1	miR-146a-5p (and other miRNAs w/seed GAGAACU)	5	CCL2,CXCL3,LBP,PTAFR,SFTPD	1	Homing of cells	0% (0/1)
2.236	7	1	miR-146a-5p (and other miRNAs w/seed GAGAACU)	5	CCL2,CCNA2,CXCL3,SFTPD,TLR1	1	Stimulation of cells	0% (0/1)
2.236	7	1	3M-011	5	CCL4,CD80,CD83,CD86,CXCL10	1	Quantity of leukocytes	0% (0/1)
2.236	7	1	3M-011	5	CCL4,CD80,CD83,CD86,CXCL10	1	Activation of leukocytes	100% (1/1)
2.236	7	1	3M-011	5	CCL4,CD80,CD83,CD86,CXCL10	1	Quantity of lymphatic system cells	0% (0/1)
2.236	7	1	Brd4	5	IL12B,LGALS3,PLAU,TIMP1,TNFSF8	1	Cellular infiltration by myeloid cells	0% (0/1)
2.236	7	1	IL10RA	5	C3,ITGAM,LCN2,TLR2,TREM1	1	Response of granulocytes	0% (0/1)
2.236	7	1	CEBPE	5	CD14,IL18,ITGAM,LCN2,NCF1	1	Synthesis of reactive oxygen species	100% (1/1)
2.236	7	1	carbon monoxide	5	CCL2,CCL4,IL12B,PLAUR,SERPINE1	1	Chemotaxis of phagocytes	0% (0/1)
2.236	7	1	carbon monoxide	5	CCL2,CCL4,IL12B,PLAUR,SERPINE1	1	Chemotaxis of myeloid cells	0% (0/1)
2.236	7	1	SAA	5	CCL17,Ccl2,CCL2,IL12B,TLR2	1	Chemotaxis of phagocytes	100% (1/1)
2.236	7	1	SAA	5	CCL17,Ccl2,CCL2,IL12B,TLR2	1	T cell migration	0% (0/1)
2.236	7	1	SAA	5	CCL17,Ccl2,CCL2,F3,TLR2	1	Adhesion of immune cells	100% (1/1)
2.236	7	1	SAA	5	CCL17,Ccl2,CCL2,F3,TLR2	1	Adhesion of blood cells	100% (1/1)
2.236	7	1	SAA	5	CCL17,Ccl2,CCL2,IL12B,TLR2	1	Migration of mononuclear leukocytes	0% (0/1)
2.236	7	1	SAA	5	CCL17,Ccl2,CCL2,IL12B,TLR2	1	Chemotaxis of myeloid cells	100% (1/1)
2.236	7	1	PGF	5	CCL2,CCL28,CCL4,MMP9,SERPINE1	1	Cellular homeostasis	100% (1/1)
2.236	7	1	PGF	5	CCL2,CCL28,CCL4,MMP9,SERPINE1	1	Cell movement of mononuclear leukocytes	0% (0/1)
2.236	7	1	PGF	5	CCL2,CCL28,CCL4,MMP9,SERPINE1	1	Cell movement of granulocytes	100% (1/1)
2.236	7	1	PGF	5	CCL2,CCL28,CCL4,MMP9,SERPINE1	1	Recruitment of leukocytes	100% (1/1)
2.236	7	1	TRPV4	5	Ccl2,CXCL10,HMOX1,THBS1,TLR2	1	Activation of macrophages	0% (0/1)
2.236	7	1	TRPV4	5	Ccl2,CXCL10,HMOX1,THBS1,TLR2	1	Phagocytosis	100% (1/1)
2.236	7	1	TRPV4	5	Ccl2,CCL3L3,CXCL10,THBS1,TLR2	1	T cell migration	0% (0/1)
2.236	7	1	TRPV4	5	Ccl2,CXCL10,HMOX1,PPARGC1A,TLR2	1	Quantity of macrophages	0% (0/1)
2.236	7	1	TRPV4	5	Ccl2,CCL3L3,CXCL10,THBS1,TLR2	1	Chemotaxis of macrophages	100% (1/1)
2.236	7	1	silibinin	5	CD44,IGFBP3,MMP9,PLAU,PLAUR	1	Cell movement of granulocytes	0% (0/1)
2.236	7	1	silibinin	5	CD44,IGFBP3,MMP9,PLAU,PLAUR	1	Migration of myeloid cells	0% (0/1)
2.236	7	1	silibinin	5	CD44,IGFBP3,MMP9,PLAU,PLAUR	1	Cellular infiltration	0% (0/1)
2.236	7	1	irbesartan	5	CCL2,CYBB,ITGAM,SERPINE1,SERPINF1	1	Migration of phagocytes	0% (0/1)
2.236	7	1	irbesartan	5	CCL2,CYBB,ITGAM,SERPINE1,SERPINF1	1	Cell movement of myeloid cells	0% (0/1)
2.236	7	1	bisindolylmaleimide I	5	CD44,E2F3,HMOX1,MMP12,MMP9	1	Inflammation of lung	0% (0/1)
2.236	7	1	ITGAM	5	C5AR1,Ccl2,CCL3L3,CXCL10,IL12B	1	Damage of lung	100% (1/1)
2.236	7	1	CAMP	5	C5AR1,Ccl2,IL12B,IL18,TLR2	1	Damage of kidney	0% (0/1)
2.219	15	1	zymosan	13	CCL17,Ccl2,CCL22,CCL3L3,CD86,CXCL10,CXCL2,CXCL3,HMOX1,IL12B,IRF4,ITGAM,TLR2	1	Accumulation of cells	100% (1/1)
2.219	15	1	JUN	13	A2M,ALOX12,C3,C3AR1,C5AR1,CCL2,CD44,CX3CL1,CXCL10,CXCL3,GJA1,LGALS3,PLAUR	1	Mobilization of Ca2+	0% (0/1)
2.214	12	1	FLT3LG	10	CD80,CD83,CD86,CXCL3,CYBB,FCGR1A,FOXP3,IL1RL1,ITGAM,SPI1	1	Leukopoiesis	100% (1/1)
2.157	28	1	APOE	26	C3AR1,C5AR1,CAV1,Ccl2,CCL22,CCL3L3,CCL4,CD44,CSF2RA,CXCL3,CXCL6,CYBB,CYSLTR1,IGF1,IL12B,ITGAM,LCN2,MMP9,PLAU,PTGES,S100A8,S100A9,SERPINE1,SPP1,TIAM1,TLR2	1	Chemotaxis	100% (1/1)
2.121	10	1	15-deoxy-delta-12,14 -PGJ 2	8	CCL11,Ccl2,CCL2,CXCL10,CXCL2,ITGAM,MMP9,SPP1	1	Accumulation of granulocytes	0% (0/1)
2.121	10	1	IKBKG	8	C3,Ccl9,CX3CL1,CXCL10,CXCL2,CXCL3,CXCL6,FCER2	1	Mobilization of Ca2+	0% (0/1)
2.121	10	1	SREBF1	8	C5AR1,CCL17,CD14,CXCL10,FABP5,HMOX1,LGALS3,SERPINE1	1	Recruitment of leukocytes	0% (0/1)
2.111	13	1	KITLG	11	AIF1,Ccl2,CCL2,CCL22,CCL3L3,CCL4,CX3CL1,CXCL3,FABP5,IL18,OSM	1	Lymphocyte migration	0% (0/1)
2.111	13	1	KITLG	11	AIF1,Ccl2,CCL2,CCL22,CCL3L3,CCL4,CX3CL1,CXCL3,FABP5,IL18,OSM	1	Migration of lymphatic system cells	0% (0/1)
2.111	13	1	TGFBR1	11	C1QA,C3,Ccl2,CCL4,CD86,CXCL10,CXCL3,HMOX1,IL1RN,ITGB2,TLR1	1	Activation of phagocytes	0% (0/1)
2.111	13	1	TGFBR1	11	C1QA,C3,Ccl2,CCL4,CD86,CXCL10,CXCL3,HMOX1,IL1RN,ITGB2,TLR1	1	Activation of myeloid cells	0% (0/1)
2.111	13	1	PRKD1	11	CCL11,Ccl2,CCL4,CD86,CXCL10,CXCL2,CXCL3,CXCL6,F3,MMP9,PPARGC1A	1	Cancer of cells	100% (1/1)
2.066	17	1	P38 MAPK	15	CCL11,CCL2,CCL3L3,CD44,CXCL10,CXCL11,CXCL2,CXCL3,CXCL6,FCER2,GJA1,ITGB2,PLAUR,TLR2,TREM1	1	Mobilization of Ca2+	0% (0/1)
2.041	8	1	KDR	6	BTK,Ccl2,F3,FABP4,HMOX1,MMP14	1	Cell movement of myeloid cells	100% (1/1)
2.041	8	1	ATF4	6	APOE,CCL2,CXCL2,KL,LGALS3,PENK	1	Binding of leukocytes	0% (0/1)
2.041	8	1	monocrotaline	6	Ccl2,CYBB,HMOX1,MMP9,SPP1,TUBB3	1	Growth of tumor	0% (0/1)
2.041	8	1	IRF1	6	CCL2,CXCL10,CYBB,IL18,KL,MMP9	1	Activation of macrophages	0% (0/1)
2.041	8	1	ICAM1	6	CCL3L3,CCL4,CD80,CD86,CXCL2,CXCL3	1	Adhesion of immune cells	100% (1/1)
2.041	8	1	ICAM1	6	CCL3L3,CCL4,CD80,CD86,CXCL2,CXCL3	1	Adhesion of blood cells	100% (1/1)
2.041	8	1	ICAM1	6	CCL3L3,CCL4,CD86,CXCL2,CXCL3,MMP9	1	Transmigration of blood cells	100% (1/1)
2.041	8	1	FFAR3	6	CCL22,CCL28,CD80,CXCL10,GPR183,KLF15	1	Cell movement of leukocytes	0% (0/1)
2.041	8	1	CBL	6	CCL3L3,CFTR,CXCL2,CXCL3,HMOX1,IL12B	1	Accumulation of cells	0% (0/1)
2.041	8	1	CBL	6	CCL3L3,CSF2RB,CXCL2,CXCL3,HMOX1,IL12B	1	Migration of phagocytes	0% (0/1)
2.041	8	1	leukotriene B4	6	Ccl2,CXCL2,F3,IRF5,ITGAM,MMP9	1	Recruitment of phagocytes	100% (1/1)
2.041	8	1	leukotriene B4	6	Ccl2,CXCL2,F3,IRF5,ITGAM,MMP9	1	Cell movement of myeloid cells	100% (1/1)
2.041	8	1	leukotriene B4	6	Ccl2,CXCL2,F3,IRF5,ITGAM,MMP9	1	Recruitment of cells	100% (1/1)
2.041	8	1	monophosphoryl lipid A	6	Ccl2,CD80,CD86,CXCL10,IL12B,IL1RN	1	Quantity of leukocytes	0% (0/1)
2.041	8	1	wortmannin	6	Ccl2,CCL2,CCL4,CD44,F3,ITGAM	1	Extravasation	0% (0/1)
2.041	8	1	PTGER4	6	CCL2,CCL3L3,CXCL10,IL18,NCF1,OLR1	1	Lung injury	100% (1/1)
2.041	8	1	SFTPA1	6	Ccl2,CXCL3,GPR68,IL1RL1,PHLDA1,SERPINE1	1	Growth of tumor	0% (0/1)
2.041	8	1	FOXL2	6	CCL3L3,CXCL2,CXCL3,CXCL6,IGF1,INHBA	1	Chemotaxis	0% (0/1)
2.041	8	1	IL13	6	CHI3L1,CTSB,IGF1,MMP14,SPP1,TIMP1	1	Proliferation of hepatic stellate cells	0% (0/1)
2.041	8	1	cadmium	6	C3,HMOX1,LGALS3,PLAU,SERPINF1,TIMP1	1	Cell movement of myeloid cells	0% (0/1)
2.041	8	1	Sod	6	Ccl2,CCL3L3,CCL4,CXCL3,HLA-DRA,HMOX1	1	Activation of cells	100% (1/1)
2.041	8	1	RNF31	6	CCL11,CCL4,CXCL2,IL18,IL1R2,IL24	1	Synthesis of reactive oxygen species	0% (0/1)
2.041	8	1	miR-17-5p (and other miRNAs w/seed AAAGUGC)	6	BLNK,Ccl2,CCNE1,EGR2,ESR1,ITGB8	1	Leukopoiesis	100% (1/1)
2.041	8	1	Notch	6	CAPG,CSF2RB,FCGR2A,FCGR2B,IDH1,PLAU	1	Engulfment of cells	0% (0/1)
2.041	8	1	EZH2	6	C3,CHRM3,CX3CL1,CXCL10,CXCL11,CXCL2	1	Mobilization of Ca2+	0% (0/1)
2.041	8	1	NFATC1	6	CTSK,CYBB,HMOX1,IL12B,SPP1,THBS1	1	Cell movement of macrophages	0% (0/1)
2.041	8	1	NFATC1	6	CTSK,CYBB,HMOX1,IL12B,SPP1,THBS1	1	Cell movement of antigen presenting cells	0% (0/1)
2.041	8	1	VCAN	6	C3,Ccl2,CYBA,LCN2,LGALS3,PLAU	1	Phagocytosis	0% (0/1)
2.041	8	1	calphostin C	6	AGT,CCL2,MMP9,MSR1,PLAU,S100A8	1	Activation of cells	0% (0/1)
2.041	8	1	calphostin C	6	AGT,CCL2,MMP9,PLAU,SLC2A1,SOD2	1	Metastasis	0% (0/1)
2.041	8	1	calphostin C	6	AGT,CCL2,MMP9,PLAU,SLC2A1,SOD2	1	Advanced malignant tumor	0% (0/1)
2.041	8	1	mir-182	6	ARG1,CCL2,CD163,CHI3L1,CXCL13,Retnla	1	Inflammatory response	0% (0/1)
2.041	8	1	ATF3	6	CX3CL1,IL12B,PENK,PTGES,SERPINE1,TLR2	1	Cell movement of mononuclear leukocytes	0% (0/1)
2.021	14	1	Lh	12	AKAP12,AREG,EREG,MMP9,PGR,PTPRN,SLC7A11,SOD2,THBS1,THBS2,TK1,TNFRSF12A	1	Inflammation of body cavity	0% (0/1)
2	6	1	PIM2	4	CD44,PPARGC1A,TBX21,TP73	1	Metastasis	0% (0/1)
2	6	1	p38 Sapk	4	CD80,CD83,CD86,CDKN2A	1	Cellular homeostasis	0% (0/1)
2	6	1	IL37	4	CCL4,CXCL10,CXCL2,CXCL3	1	Chemotaxis of phagocytes	0% (0/1)
2	6	1	IL37	4	CCL4,CXCL10,CXCL2,CXCL3	1	Binding of leukocytes	0% (0/1)
2	6	1	IL37	4	CCL4,CXCL10,CXCL2,CXCL3	1	Homing of leukocytes	0% (0/1)
2	6	1	IL37	4	CCL4,CXCL10,CXCL2,CXCL3	1	Adhesion of blood cells	0% (0/1)
2	6	1	IL37	4	CCL4,CXCL10,CXCL2,CXCL3	1	Chemotaxis of myeloid cells	0% (0/1)
2	6	1	IL37	4	CCL4,CXCL10,CXCL2,CXCL3	1	Mobilization of Ca2+	0% (0/1)
2	6	1	CD276	4	CD80,CD86,CXCL10,CXCL11	1	Binding of leukocytes	0% (0/1)
2	6	1	CD276	4	CD80,CD86,CXCL10,CXCL11	1	Adhesion of blood cells	0% (0/1)
2	6	1	PF-562271	4	Ccl2,CCL3L3,CCL4,CXCL10	1	Chemotaxis of macrophages	0% (0/1)
2	6	1	PF-562271	4	Ccl2,CCL3L3,CCL4,CXCL10	1	Quantity of leukocytes	0% (0/1)
2	6	1	PF-562271	4	Ccl2,CCL3L3,CCL4,CXCL10	1	Activation of cells	0% (0/1)
2	6	1	PF-562271	4	Ccl2,CCL3L3,CCL4,CXCL10	1	Chemotaxis of phagocytes	0% (0/1)
2	6	1	PF-562271	4	Ccl2,CCL3L3,CCL4,CXCL10	1	Cell movement of neutrophils	0% (0/1)
2	6	1	PF-562271	4	Ccl2,CCL3L3,CCL4,CXCL10	1	Chemotaxis of myeloid cells	0% (0/1)
2	6	1	PF-562271	4	Ccl2,CCL3L3,CCL4,CXCL10	1	Cellular infiltration by leukocytes	0% (0/1)
2	6	1	PF-562271	4	Ccl2,CCL3L3,CCL4,CXCL10	1	T cell migration	0% (0/1)
2	6	1	PF-562271	4	Ccl2,CCL3L3,CCL4,CXCL10	1	Migration of antigen presenting cells	0% (0/1)
2	6	1	PF-562271	4	Ccl2,CCL3L3,CCL4,CXCL10	1	Hypersensitive reaction	0% (0/1)
2	6	1	PF-562271	4	Ccl2,CCL3L3,CCL4,CXCL10	1	Recruitment of phagocytes	0% (0/1)
2	6	1	PF-562271	4	Ccl2,CCL3L3,CCL4,CXCL10	1	Binding of leukocytes	0% (0/1)
2	6	1	PF-562271	4	Ccl2,CCL3L3,CCL4,CXCL10	1	Chemotaxis of antigen presenting cells	0% (0/1)
2	6	1	PF-562271	4	Ccl2,CCL3L3,CCL4,CXCL10	1	Migration of lymphatic system cells	0% (0/1)
2	6	1	PF-562271	4	Ccl2,CCL3L3,CCL4,CXCL10	1	Adhesion of blood cells	0% (0/1)
2	6	1	PF-562271	4	Ccl2,CCL3L3,CCL4,CXCL10	1	Migration of mononuclear leukocytes	0% (0/1)
2	6	1	PF-562271	4	Ccl2,CCL3L3,CCL4,CXCL10	1	Recruitment of myeloid cells	0% (0/1)
2	6	1	PF-562271	4	Ccl2,CCL3L3,CCL4,CXCL10	1	Migration of phagocytes	0% (0/1)
2	6	1	PF-562271	4	Ccl2,CCL3L3,CCL4,CXCL10	1	Recruitment of antigen presenting cells	0% (0/1)
2	6	1	PF-562271	4	Ccl2,CCL3L3,CCL4,CXCL10	1	Cell movement of eosinophils	0% (0/1)
2	6	1	V-PYRRO/NO	4	CXCL2,CXCL3,HMOX1,THBS1	1	Transport of molecule	0% (0/1)
2	6	1	V-PYRRO/NO	4	CXCL2,CXCL3,HMOX1,THBS1	1	Cell movement of myeloid cells	0% (0/1)
2	6	1	V-PYRRO/NO	4	CXCL2,CXCL3,HMOX1,THBS1	1	Cell movement of phagocytes	0% (0/1)
2	6	1	V-PYRRO/NO	4	CXCL2,CXCL3,HMOX1,THBS1	1	Accumulation of cells	0% (0/1)
2	6	1	TLR7/8	4	CCL2,EREG,GEM,PLAUR	1	Angiogenesis	0% (0/1)
2	6	1	salicylic acid	4	CCL4,CXCL10,F3,MMP9	1	Activation of blood cells	0% (0/1)
2	6	1	salicylic acid	4	CCL4,CXCL10,F3,MMP9	1	Cell movement of granulocytes	0% (0/1)
2	6	1	salicylic acid	4	CCL4,CXCL10,F3,MMP9	1	Cellular infiltration by leukocytes	0% (0/1)
2	6	1	salicylic acid	4	CCL4,CXCL10,F3,OLR1	1	Binding of leukocytes	100% (1/1)
2	6	1	salicylic acid	4	CCL4,CXCL10,F3,OLR1	1	Adhesion of blood cells	100% (1/1)
2	6	1	nimesulide	4	AREG,EREG,MMP9,NCF1	1	Migration of cells	0% (0/1)
2	6	1	nimesulide	4	AREG,EREG,MMP9,NCF1	1	Angiogenesis	0% (0/1)
2	6	1	Y-320	4	CXCL10,CXCL11,CXCL2,CXCL3	1	Chemotaxis of leukocytes	0% (0/1)
2	6	1	Y-320	4	CXCL10,CXCL11,CXCL2,CXCL3	1	Inflammatory response	0% (0/1)
2	6	1	Y-320	4	CXCL10,CXCL11,CXCL2,CXCL3	1	Chemotaxis	0% (0/1)
2	6	1	Y-320	4	CXCL10,CXCL11,CXCL2,CXCL3	1	Recruitment of leukocytes	0% (0/1)
2	6	1	Y-320	4	CXCL10,CXCL11,CXCL2,CXCL3	1	Binding of leukocytes	0% (0/1)
2	6	1	Y-320	4	CXCL10,CXCL11,CXCL2,CXCL3	1	Homing of blood cells	0% (0/1)
2	6	1	Y-320	4	CXCL10,CXCL11,CXCL2,CXCL3	1	Adhesion of blood cells	0% (0/1)
2	6	1	Y-320	4	CXCL10,CXCL11,CXCL2,CXCL3	1	Mobilization of Ca2+	0% (0/1)
2	6	1	CCL-34	4	CD4,CXCL10,ITGAM,ITGAX	1	Migration of cells	0% (0/1)
2	6	1	CCL-34	4	CD4,CXCL10,ITGAM,ITGAX	1	Activation of cells	0% (0/1)
2	6	1	CCL-34	4	CD4,CXCL10,ITGAM,ITGAX	1	Infection of mammalia	0% (0/1)
2	6	1	CCL-34	4	CD4,CXCL10,ITGAM,ITGAX	1	Binding of leukocytes	0% (0/1)
2	6	1	CCL-34	4	CD4,CXCL10,ITGAM,ITGAX	1	Adhesion of blood cells	0% (0/1)
2	6	1	ROR1	4	ITGB2,NDRG1,SERPINE1,THBS1	1	Cell movement of macrophages	0% (0/1)
2	6	1	ROR1	4	ITGB2,NDRG1,SERPINE1,THBS1	1	Cell movement of myeloid cells	0% (0/1)
2	6	1	ROR1	4	ITGB2,NDRG1,SERPINE1,THBS1	1	Cell movement of antigen presenting cells	0% (0/1)
2	6	1	10E,12Z-octadecadienoic acid	4	Ccl2,CCL2,FABP4,IGFBP3	1	Cell movement of eosinophils	0% (0/1)
2	6	1	ssRNA40	4	CD80,CD83,CD86,IL12B	1	Cellular homeostasis	0% (0/1)
2	6	1	ssRNA40	4	CD80,CD83,CD86,IL12B	1	Quantity of leukocytes	0% (0/1)
2	6	1	ssRNA40	4	CD80,CD83,CD86,IL12B	1	Activation of T lymphocytes	100% (1/1)
2	6	1	ssRNA40	4	CD80,CD83,CD86,IL12B	1	Quantity of lymphatic system cells	0% (0/1)
2	6	1	ssRNA40	4	CD80,CD83,CD86,IL12B	1	Lymphopoiesis	0% (0/1)
2	6	1	ssRNA40	4	CD80,CD83,CD86,IL12B	1	Activation of lymphoid cells	100% (1/1)
2	6	1	AKT1	4	MMP14,SLC2A1,SPP1,TIMP1	1	Proliferation of hepatic stellate cells	100% (1/1)
2	6	1	F2RL1	4	CCL2,CXCL2,F3,MMP9	1	Accumulation of neutrophils	0% (0/1)
2	6	1	TNFRSF12A	4	Ccl2,CCL2,CXCL10,KL	1	Cell movement of macrophages	0% (0/1)
2	6	1	TNFRSF12A	4	Ccl2,CCL2,CXCL10,KL	1	Activation of macrophages	0% (0/1)
2	6	1	TNFRSF12A	4	Ccl2,CCL2,CXCL10,KL	1	Cellular infiltration by myeloid cells	0% (0/1)
2	6	1	TNFRSF12A	4	Ccl2,CCL2,CXCL10,KL	1	Cellular infiltration by phagocytes	0% (0/1)
2	6	1	TNFRSF12A	4	Ccl2,CCL2,CXCL10,KL	1	Cell movement of antigen presenting cells	0% (0/1)
2	6	1	TNFRSF12A	4	Ccl2,CCL2,CXCL10,KL	1	Binding of leukocytes	0% (0/1)
2	6	1	TNFRSF12A	4	Ccl2,CCL2,CXCL10,KL	1	Activation of myeloid cells	0% (0/1)
2	6	1	TNFRSF12A	4	Ccl2,CCL2,CXCL10,KL	1	Activation of antigen presenting cells	0% (0/1)
2	6	1	TNFRSF12A	4	Ccl2,CCL2,CXCL10,KL	1	Adhesion of blood cells	0% (0/1)
2	6	1	JAK1	4	CCL2,CD14,CHI3L1,REG3A	1	Activation of macrophages	0% (0/1)
2	6	1	JAK1	4	CCL2,CD14,CHI3L1,REG3A	1	Activation of myeloid cells	0% (0/1)
2	6	1	JAK1	4	CCL2,CD14,CHI3L1,REG3A	1	Activation of antigen presenting cells	0% (0/1)
2	11	1	isobutylmethylxanthine	9	AGT,Ccl2,CCL22,CD14,CD44,INHBA,ITGB2,PTPRN,THBS1	1	Activation of antigen presenting cells	100% (1/1)
2	6	1	SU6656	4	Ccl2,Ccl7,IL1RL1,INHBA	1	Cell movement of phagocytes	0% (0/1)
2	6	1	SU6656	4	Ccl2,Ccl7,IL1RL1,INHBA	1	Cell movement of myeloid cells	0% (0/1)
2	6	1	PARP2	4	CCL1,CCL4,CXCL13,FABP4	1	Inflammatory response	0% (0/1)
2	6	1	PARP2	4	CCL1,CCL4,CD80,CD86	1	Activation of myeloid cells	0% (0/1)
2	6	1	allopurinol	4	LGALS3,SLC2A1,SPP1,TIMP1	1	Proliferation of hepatic stellate cells	0% (0/1)
2	6	1	HSPD1	4	Ccl2,CXCL2,CXCL3,TBX21	1	Metastasis	0% (0/1)
2	6	1	HSPD1	4	Ccl2,CXCL2,CXCL3,IL12B	1	Chemotaxis of phagocytes	0% (0/1)
2	6	1	HSPD1	4	Ccl2,CXCL2,CXCL3,TBX21	1	Advanced malignant tumor	0% (0/1)
2	6	1	HSPD1	4	Ccl2,CXCL2,CXCL3,IL12B	1	Migration of phagocytes	0% (0/1)
2	6	1	HSPD1	4	Ccl2,CXCL2,CXCL3,IL12B	1	Chemotaxis of myeloid cells	0% (0/1)
2	6	1	HSPD1	4	Ccl2,CXCL2,CXCL3,IL12B	1	Cellular infiltration by granulocytes	0% (0/1)
2	6	1	HSPD1	4	Ccl2,CXCL2,CXCL3,IL12B	1	Homing of leukocytes	100% (1/1)
2	6	1	HSPD1	4	Ccl2,CXCL2,CXCL3,IL12B	1	Accumulation of phagocytes	0% (0/1)
2	6	1	HSPD1	4	Ccl2,CXCL2,CXCL3,IL12B	1	Cellular infiltration by myeloid cells	0% (0/1)
2	6	1	HSPD1	4	Ccl2,CXCL2,CXCL3,IL12B	1	Accumulation of myeloid cells	0% (0/1)
2	6	1	Ifn gamma	4	Ccl2,CCL2,CXCL10,TNFRSF9	1	Cell movement of eosinophils	0% (0/1)
2	6	1	SMARCA4	4	F3,SERPINE1,SLC11A1,SPP1	1	Increased Levels of Hematocrit	0% (0/1)
2	6	1	NRG1	4	ITGAM,ITGB2,MMP9,THBS1	1	Recruitment of antigen presenting cells	0% (0/1)
2	11	1	NRG1	9	CXCL6,HMOX1,ITGAM,ITGB2,MMP9,PLAU,PLAUR,SERPINE1,TGFBR1	1	Migration of phagocytes	0% (0/1)
2	11	1	NRG1	9	CXCL6,HMOX1,ITGAM,ITGB2,MMP9,PLAU,PLAUR,SERPINE1,TGFBR1	1	Migration of myeloid cells	0% (0/1)
2	6	1	PTGIS	4	CXCL2,CXCL3,CXCL6,PTGES	1	Cell movement of phagocytes	0% (0/1)
2	6	1	PTGIS	4	CXCL2,CXCL3,CXCL6,PTGES	1	Inflammatory response	100% (1/1)
2	6	1	PTGIS	4	CXCL2,CXCL3,CXCL6,PTGES	1	Cell movement of myeloid cells	0% (0/1)
2	6	1	TNFRSF1B	4	CXCL2,LBP,MMP9,TIMP1	1	Infiltration by neutrophils	100% (1/1)
2	6	1	paraquat	4	CYBB,HMOX1,ITGAM,MMP9	1	Migration of myeloid cells	0% (0/1)
2	6	1	cisplatin	4	F3,HMOX1,SERPINE1,SPP1	1	Increased Levels of Hematocrit	0% (0/1)
2	6	1	MEX3A	4	CD44,CENPA,PLK1,PPARGC1A	1	Growth of tumor	0% (0/1)
2	6	1	KDM2B	4	Ccl2,Ccl7,CX3CL1,CXCL10	1	Chemotaxis of phagocytes	0% (0/1)
2	6	1	KDM2B	4	Ccl2,Ccl7,CX3CL1,CXCL10	1	Homing of leukocytes	0% (0/1)
2	6	1	KDM2B	4	Ccl2,Ccl7,CX3CL1,CXCL10	1	Cell movement of lymphatic system cells	0% (0/1)
2	6	1	KDM2B	4	Ccl2,Ccl7,CX3CL1,CXCL10	1	Chemotaxis of myeloid cells	0% (0/1)
2	6	1	CSF	4	C3,CCL4,FCGR1A,TNFRSF9	1	Degranulation of leukocytes	0% (0/1)
2	11	1	OSM	9	CCL11,Ccl2,CCL2,CXCL10,LITAF,PLAU,PTGES,SPP1,TLR2	1	Chemotaxis of antigen presenting cells	0% (0/1)
2	6	1	MALT1	4	CD44,CXCL2,LCN2,S100A8	1	Synthesis of reactive oxygen species	0% (0/1)
2	6	1	MALT1	4	CXCL2,CXCL3,LCN2,S100A8	1	Chemotaxis of phagocytes	0% (0/1)
2	6	1	MALT1	4	CXCL2,CXCL3,LCN2,S100A8	1	Chemotaxis of granulocytes	0% (0/1)
2	6	1	GRN	4	Ccl2,CCL2,CCL4,ITGB2	1	Extravasation	0% (0/1)
2	11	1	GRN	9	C3,Ccl2,CCL2,CCL4,CXCL2,IL12B,ITGB2,LGALS3,SPI1	1	Cell movement of eosinophils	0% (0/1)
2	6	1	molybdenum disulfide	4	CCL2,CTSK,HMOX1,SPP1	1	Cellular infiltration by macrophages	0% (0/1)
2	6	1	propofol	4	CCL2,CD14,CYBB,PF4	1	Leukopoiesis	0% (0/1)
2	6	1	propofol	4	CCL2,CYBB,MMP9,PF4	1	Cell movement of dendritic cells	0% (0/1)
2	6	1	EEF1A2	4	CYBA,CYBB,ITGB2,NCF1	1	Vasculogenesis	0% (0/1)
2	6	1	EEF1A2	4	CYBA,CYBB,ITGB2,NCF1	1	Phagocytosis	0% (0/1)
2	11	1	IRAK4	9	CCL17,Ccl2,CD80,CD86,CXCL10,CXCL2,CXCL3,MARCO,OLR1	1	Binding of leukocytes	0% (0/1)
2	11	1	IRAK4	9	CCL17,Ccl2,CD80,CD86,CXCL10,CXCL2,CXCL3,MARCO,OLR1	1	Adhesion of blood cells	0% (0/1)
2	6	1	NSUN6	4	ITGB2,NDRG1,SERPINE1,THBS1	1	Cell movement of macrophages	0% (0/1)
2	6	1	NSUN6	4	ITGB2,NDRG1,SERPINE1,THBS1	1	Cell movement of myeloid cells	0% (0/1)
2	6	1	NSUN6	4	ITGB2,NDRG1,SERPINE1,THBS1	1	Cell movement of antigen presenting cells	0% (0/1)
2	6	1	dicarbethoxydihydrocollidine	4	Ccl2,SPP1,UBD,WNT7B	1	Metastasis	0% (0/1)
2	6	1	dicarbethoxydihydrocollidine	4	Ccl2,SPP1,UBD,WNT7B	1	Advanced malignant tumor	0% (0/1)
2	6	1	KLK5	4	CXCL2,IL18,S100A8,S100A9	1	Cell movement of neutrophils	0% (0/1)
2	6	1	KLK5	4	CXCL2,IL18,S100A8,S100A9	1	Chemotaxis of phagocytes	0% (0/1)
2	6	1	KLK5	4	CXCL2,IL18,S100A8,S100A9	1	Chemotaxis of granulocytes	0% (0/1)
2	6	1	KLK5	4	CXCL2,IL18,S100A8,S100A9	1	Chemotaxis of myeloid cells	0% (0/1)
2	6	1	KLK5	4	CXCL2,IL18,S100A8,S100A9	1	Adhesion of immune cells	0% (0/1)
2	6	1	KLK5	4	CXCL2,IL18,S100A8,S100A9	1	Homing of leukocytes	0% (0/1)
2	6	1	KLK5	4	CXCL2,IL18,S100A8,S100A9	1	Accumulation of neutrophils	0% (0/1)
2	6	1	KLK5	4	CXCL2,IL18,S100A8,S100A9	1	Adhesion of blood cells	0% (0/1)
2	6	1	KLK5	4	CXCL2,IL18,S100A8,S100A9	1	Migration of phagocytes	0% (0/1)
2	6	1	KLK5	4	CXCL2,IL18,S100A8,S100A9	1	Binding of myeloid cells	0% (0/1)
2	6	1	KLK5	4	CXCL2,IL18,S100A8,S100A9	1	Migration of myeloid cells	0% (0/1)
2	6	1	KLK5	4	CXCL2,IL18,S100A8,S100A9	1	Accumulation of granulocytes	0% (0/1)
2	6	1	S100A4	4	CXCL3,PF4,S100A8,S100A9	1	Chemotaxis of granulocytes	0% (0/1)
2	6	1	S100A4	4	CXCL3,MMP9,S100A8,S100A9	1	Accumulation of neutrophils	0% (0/1)
2	11	1	S100A4	9	CCL1,Ccl9,CXCL3,MMP14,MMP9,PLAU,S100A8,S100A9,TIMP1	1	Migration of phagocytes	0% (0/1)
2	6	1	PIAS4	4	CXCL2,IL12B,ITGB8,SERPINE1	1	Migration of cells	0% (0/1)
2	6	1	L-glutamic acid	4	Ccl2,CFD,IL18,MMP9	1	Cellular infiltration by macrophages	0% (0/1)
2	6	1	L-glutamic acid	4	Ccl2,IL18,MMP9,PPARGC1A	1	Quantity of macrophages	0% (0/1)
2	6	1	JAK2	4	Ccl2,CCL2,CXCL10,OSM	1	Cell movement of eosinophils	0% (0/1)
2	6	1	cyclooxygenase	4	ARG1,HMOX1,IGF1,TNN	1	Angiogenesis	100% (1/1)
2	6	1	cyclooxygenase	4	ARG1,HMOX1,IGF1,Retnla	1	Activation of macrophages	0% (0/1)
2	6	1	CSF1R	4	CCL3L3,HMOX1,MMP9,SPI1	1	Accumulation of cells	0% (0/1)
2	6	1	CSF1R	4	ARG1,HMOX1,MMP9,MSR1	1	Activation of macrophages	100% (1/1)
2	6	1	CSF1R	4	CCL3L3,HMOX1,MMP9,SPI1	1	Migration of phagocytes	100% (1/1)
2	6	1	CSF1R	4	CCL3L3,HMOX1,MMP9,SPI1	1	Migration of antigen presenting cells	100% (1/1)
2	6	1	chelerythrine	4	Ccl2,CXCL3,CYBB,PIM1	1	Migration of cells	100% (1/1)
2	6	1	chelerythrine	4	Ccl2,CYBA,CYBB,PIM1	1	Vasculogenesis	100% (1/1)
2	6	1	chelerythrine	4	Ccl2,CXCL3,CYBB,PIM1	1	Leukopoiesis	0% (0/1)
2	6	1	chelerythrine	4	Ccl2,CXCL3,CYBB,PIM1	1	Accumulation of blood cells	0% (0/1)
2	6	1	LOXL1	4	Ccl2,MMP12,MMP9,TIMP1	1	Cell movement of neutrophils	0% (0/1)
2	6	1	LOXL1	4	Ccl2,MMP12,MMP9,TIMP1	1	Cellular infiltration by granulocytes	0% (0/1)
2	6	1	LOXL1	4	Ccl2,MMP12,MMP9,TIMP1	1	Cellular infiltration by phagocytes	0% (0/1)
2	6	1	NR3C1	4	Ccl2,CCL2,CCL3L3,MMP9	1	Experimental autoimmune myocarditis	0% (0/1)
2	6	1	laquinimod	4	CCL22,CX3CL1,MSR1,TPH1	1	Adhesion of immune cells	0% (0/1)
2	6	1	laquinimod	4	CCL22,CX3CL1,MSR1,TPH1	1	Adhesion of blood cells	0% (0/1)
2	6	1	IL21	4	CCL3L3,CCL4,FCGR2B,HAVCR2	1	Degranulation of myeloid cells	0% (0/1)
2	6	1	C7	4	Ccl2,CCL3L3,CXCL2,CXCL3	1	Cell movement of neutrophils	0% (0/1)
2	6	1	C7	4	Ccl2,CCL3L3,CXCL2,CXCL3	1	Chemotaxis of phagocytes	0% (0/1)
2	6	1	C7	4	Ccl2,CCL3L3,CXCL2,CXCL3	1	Chemotaxis of granulocytes	0% (0/1)
2	6	1	C7	4	Ccl2,CCL3L3,CXCL2,CXCL3	1	Chemotaxis of myeloid cells	0% (0/1)
2	6	1	C7	4	Ccl2,CCL3L3,CXCL2,CXCL3	1	Cellular infiltration by leukocytes	0% (0/1)
2	6	1	C7	4	Ccl2,CCL3L3,CXCL2,CXCL3	1	Recruitment of phagocytes	0% (0/1)
2	6	1	C7	4	Ccl2,CCL3L3,CXCL2,CXCL3	1	Adhesion of immune cells	0% (0/1)
2	6	1	C7	4	Ccl2,CCL3L3,CXCL2,CXCL3	1	Homing of leukocytes	0% (0/1)
2	6	1	C7	4	Ccl2,CCL3L3,CXCL2,CXCL3	1	Accumulation of leukocytes	0% (0/1)
2	6	1	C7	4	Ccl2,CCL3L3,CXCL2,CXCL3	1	Adhesion of blood cells	0% (0/1)
2	6	1	C7	4	Ccl2,CCL3L3,CXCL2,CXCL3	1	Recruitment of myeloid cells	0% (0/1)
2	6	1	C7	4	Ccl2,CCL3L3,CXCL2,CXCL3	1	Migration of phagocytes	0% (0/1)
2	6	1	C7	4	Ccl2,CCL3L3,CXCL2,CXCL3	1	Transmigration of blood cells	0% (0/1)
2	6	1	C7	4	Ccl2,CCL3L3,CXCL2,CXCL3	1	Migration of myeloid cells	0% (0/1)
2	6	1	C7	4	Ccl2,CCL3L3,CXCL2,CXCL3	1	Accumulation of myeloid cells	0% (0/1)
2	6	1	KAT2B	4	CCL2,HK2,ITGAM,SLC2A1	1	Vasculogenesis	0% (0/1)
2	6	1	HRG	4	CD74,CD83,HLA-DQA1,SPP1	1	Lymphopoiesis	0% (0/1)
2	6	1	ADGRF5	4	Ccl2,CCL3L3,CXCL3,MMP9	1	Lymphocyte migration	0% (0/1)
2	6	1	ADGRF5	4	Ccl2,CCL3L3,CXCL3,MMP9	1	Migration of lymphatic system cells	0% (0/1)
2	6	1	ADGRF5	4	Ccl2,CCL3L3,CXCL3,MMP9	1	Migration of mononuclear leukocytes	0% (0/1)
2	6	1	ADGRF5	4	Ccl2,CCL3L3,CXCL3,MMP9	1	Transmigration of blood cells	0% (0/1)
2	6	1	ADGRF5	4	Ccl2,CCL3L3,CXCL3,MMP9	1	Migration of myeloid cells	0% (0/1)
2	6	1	belnacasan	4	Ccl2,CCL3L3,CXCL3,IL18	1	Cell movement of macrophages	0% (0/1)
2	6	1	belnacasan	4	Ccl2,CCL3L3,CXCL3,IL18	1	Activation of cells	0% (0/1)
2	6	1	belnacasan	4	Ccl2,CCL3L3,CXCL3,IL18	1	Chemotaxis of phagocytes	0% (0/1)
2	6	1	belnacasan	4	Ccl2,CCL3L3,CXCL3,IL18	1	Cell movement of neutrophils	0% (0/1)
2	6	1	belnacasan	4	Ccl2,CCL3L3,CXCL3,IL18	1	Chemotaxis of granulocytes	0% (0/1)
2	6	1	belnacasan	4	Ccl2,CCL3L3,CXCL3,IL18	1	Cellular infiltration by leukocytes	0% (0/1)
2	6	1	belnacasan	4	Ccl2,CCL3L3,CXCL3,IL18	1	Lymphocyte migration	0% (0/1)
2	6	1	belnacasan	4	Ccl2,CCL3L3,CXCL3,IL18	1	Migration of antigen presenting cells	0% (0/1)
2	6	1	belnacasan	4	Ccl2,CCL3L3,CXCL3,IL18	1	Recruitment of phagocytes	0% (0/1)
2	6	1	belnacasan	4	Ccl2,CCL3L3,CXCL3,IL18	1	Adhesion of immune cells	0% (0/1)
2	6	1	belnacasan	4	Ccl2,CCL3L3,CXCL3,IL18	1	Homing of leukocytes	0% (0/1)
2	6	1	belnacasan	4	Ccl2,CCL3L3,CXCL3,IL18	1	Migration of lymphatic system cells	0% (0/1)
2	6	1	belnacasan	4	Ccl2,CCL3L3,CXCL3,IL18	1	Accumulation of leukocytes	0% (0/1)
2	6	1	belnacasan	4	Ccl2,CCL3L3,CXCL3,IL18	1	Adhesion of blood cells	0% (0/1)
2	6	1	belnacasan	4	Ccl2,CCL3L3,CXCL3,IL18	1	Migration of mononuclear leukocytes	0% (0/1)
2	6	1	belnacasan	4	Ccl2,CCL3L3,CXCL3,IL18	1	Recruitment of myeloid cells	0% (0/1)
2	6	1	belnacasan	4	Ccl2,CCL3L3,CXCL3,IL18	1	Migration of phagocytes	0% (0/1)
2	6	1	belnacasan	4	Ccl2,CCL3L3,CXCL3,IL18	1	Migration of myeloid cells	0% (0/1)
2	6	1	belnacasan	4	Ccl2,CCL3L3,CXCL3,IL18	1	Accumulation of myeloid cells	0% (0/1)
2	6	1	MMP1	4	MMP9,PLAU,PTGES,SERPINE1	1	Cell movement of macrophages	0% (0/1)
2	6	1	butaprost	4	CCL3L3,CCL4,MMP9,TGFBR3	1	Migration of cells	100% (1/1)
2	6	1	butaprost	4	CCL3L3,CCL4,MMP9,PTGER2	1	Inflammatory response	0% (0/1)
2	6	1	C8	4	Ccl2,CCL3L3,CXCL2,CXCL3	1	Cell movement of neutrophils	0% (0/1)
2	6	1	C8	4	Ccl2,CCL3L3,CXCL2,CXCL3	1	Chemotaxis of phagocytes	0% (0/1)
2	6	1	C8	4	Ccl2,CCL3L3,CXCL2,CXCL3	1	Chemotaxis of granulocytes	0% (0/1)
2	6	1	C8	4	Ccl2,CCL3L3,CXCL2,CXCL3	1	Chemotaxis of myeloid cells	0% (0/1)
2	6	1	C8	4	Ccl2,CCL3L3,CXCL2,CXCL3	1	Cellular infiltration by leukocytes	0% (0/1)
2	6	1	C8	4	Ccl2,CCL3L3,CXCL2,CXCL3	1	Recruitment of phagocytes	0% (0/1)
2	6	1	C8	4	Ccl2,CCL3L3,CXCL2,CXCL3	1	Adhesion of immune cells	0% (0/1)
2	6	1	C8	4	Ccl2,CCL3L3,CXCL2,CXCL3	1	Homing of leukocytes	0% (0/1)
2	6	1	C8	4	Ccl2,CCL3L3,CXCL2,CXCL3	1	Accumulation of leukocytes	0% (0/1)
2	6	1	C8	4	Ccl2,CCL3L3,CXCL2,CXCL3	1	Adhesion of blood cells	0% (0/1)
2	6	1	C8	4	Ccl2,CCL3L3,CXCL2,CXCL3	1	Recruitment of myeloid cells	0% (0/1)
2	6	1	C8	4	Ccl2,CCL3L3,CXCL2,CXCL3	1	Migration of phagocytes	0% (0/1)
2	6	1	C8	4	Ccl2,CCL3L3,CXCL2,CXCL3	1	Transmigration of blood cells	0% (0/1)
2	6	1	C8	4	Ccl2,CCL3L3,CXCL2,CXCL3	1	Migration of myeloid cells	0% (0/1)
2	6	1	C8	4	Ccl2,CCL3L3,CXCL2,CXCL3	1	Accumulation of myeloid cells	0% (0/1)
2	6	1	ENTPD1	4	CXCL2,CXCL3,IL12B,SERPINE1	1	Chemotaxis of phagocytes	0% (0/1)
2	6	1	ENTPD1	4	CXCL2,CXCL3,IL12B,SERPINE1	1	Cell movement of granulocytes	0% (0/1)
2	6	1	ENTPD1	4	CXCL2,CXCL3,IL12B,SERPINE1	1	Chemotaxis of myeloid cells	0% (0/1)
2	6	1	ENTPD1	4	CXCL2,CXCL3,IL12B,SERPINE1	1	Homing of leukocytes	0% (0/1)
2	6	1	ENTPD1	4	CD86,CXCL2,CXCL3,IL12B	1	Accumulation of leukocytes	100% (1/1)
2	6	1	ENTPD1	4	CD86,CXCL2,CXCL3,SERPINE1	1	Transmigration of blood cells	0% (0/1)
2	6	1	C9	4	Ccl2,CCL3L3,CXCL2,CXCL3	1	Cell movement of neutrophils	0% (0/1)
2	6	1	C9	4	Ccl2,CCL3L3,CXCL2,CXCL3	1	Chemotaxis of phagocytes	0% (0/1)
2	6	1	C9	4	Ccl2,CCL3L3,CXCL2,CXCL3	1	Chemotaxis of granulocytes	0% (0/1)
2	6	1	C9	4	Ccl2,CCL3L3,CXCL2,CXCL3	1	Chemotaxis of myeloid cells	0% (0/1)
2	6	1	C9	4	Ccl2,CCL3L3,CXCL2,CXCL3	1	Cellular infiltration by leukocytes	0% (0/1)
2	6	1	C9	4	Ccl2,CCL3L3,CXCL2,CXCL3	1	Recruitment of phagocytes	0% (0/1)
2	6	1	C9	4	Ccl2,CCL3L3,CXCL2,CXCL3	1	Adhesion of immune cells	0% (0/1)
2	6	1	C9	4	Ccl2,CCL3L3,CXCL2,CXCL3	1	Homing of leukocytes	0% (0/1)
2	6	1	C9	4	Ccl2,CCL3L3,CXCL2,CXCL3	1	Accumulation of leukocytes	0% (0/1)
2	6	1	C9	4	Ccl2,CCL3L3,CXCL2,CXCL3	1	Adhesion of blood cells	0% (0/1)
2	6	1	C9	4	Ccl2,CCL3L3,CXCL2,CXCL3	1	Recruitment of myeloid cells	0% (0/1)
2	6	1	C9	4	Ccl2,CCL3L3,CXCL2,CXCL3	1	Migration of phagocytes	0% (0/1)
2	6	1	C9	4	Ccl2,CCL3L3,CXCL2,CXCL3	1	Transmigration of blood cells	0% (0/1)
2	6	1	C9	4	Ccl2,CCL3L3,CXCL2,CXCL3	1	Migration of myeloid cells	0% (0/1)
2	6	1	C9	4	Ccl2,CCL3L3,CXCL2,CXCL3	1	Accumulation of myeloid cells	0% (0/1)
2	6	1	NT5E	4	Ccl2,IGF1,SERPINE1,SPP1	1	Inflammatory response	100% (1/1)
2	6	1	NT5E	4	Ccl2,SERPINE1,SPP1,TIMP1	1	Cell movement of neutrophils	100% (1/1)
2	6	1	NT5E	4	Ccl2,IGF1,SERPINE1,SPP1	1	Chemotaxis	100% (1/1)
2	6	1	NT5E	4	IGF1,SERPINE1,SPP1,TIMP1	1	Growth of connective tissue	0% (0/1)
2	6	1	NT5E	4	Ccl2,IGF1,SERPINE1,SPP1	1	Binding of tumor cell lines	0% (0/1)
2	6	1	NT5E	4	Ccl2,IGF1,SERPINE1,SPP1	1	Transmigration of cells	0% (0/1)
2	6	1	NCOA1	4	C3,IL12B,IL1RN,SERPINE1	1	Migration of phagocytes	0% (0/1)
2	6	1	NCOA1	4	C3,IL12B,IL1RN,SERPINE1	1	Migration of antigen presenting cells	0% (0/1)
2	6	1	C5	4	Ccl2,CCL2,CCL3L3,MMP9	1	Experimental autoimmune myocarditis	0% (0/1)
2	6	1	CHD1	4	CXCL2,CXCL3,CXCL6,SOD2	1	Migration of cells	0% (0/1)
2	6	1	CHD1	4	CXCL2,CXCL3,CXCL6,SOD2	1	Metastasis	100% (1/1)
2	6	1	CHD1	4	BCL2A1,CXCL2,CXCL3,CXCL6	1	Inflammatory response	0% (0/1)
2	6	1	CHD1	4	CXCL2,CXCL3,CXCL6,SOD2	1	Advanced malignant tumor	100% (1/1)
2	6	1	FEM1A	4	Ccl2,CCL4,CXCL10,CXCL2	1	Cell movement of neutrophils	0% (0/1)
2	6	1	FEM1A	4	Ccl2,CCL4,CXCL10,CXCL2	1	Quantity of leukocytes	0% (0/1)
2	6	1	FEM1A	4	Ccl2,CCL4,CXCL10,CXCL2	1	Chemotaxis of phagocytes	0% (0/1)
2	6	1	FEM1A	4	Ccl2,CCL4,CXCL10,CXCL2	1	Cellular infiltration by granulocytes	0% (0/1)
2	6	1	FEM1A	4	Ccl2,CCL4,CXCL10,CXCL2	1	Chemotaxis of myeloid cells	0% (0/1)
2	6	1	FEM1A	4	Ccl2,CCL4,CXCL10,CXCL2	1	Cellular infiltration by phagocytes	0% (0/1)
2	6	1	FEM1A	4	Ccl2,CCL4,CXCL10,CXCL2	1	Recruitment of phagocytes	0% (0/1)
2	6	1	FEM1A	4	Ccl2,CCL4,CXCL10,CXCL2	1	Binding of leukocytes	0% (0/1)
2	6	1	FEM1A	4	Ccl2,CCL4,CXCL10,CXCL2	1	Homing of leukocytes	0% (0/1)
2	6	1	FEM1A	4	Ccl2,CCL4,CXCL10,CXCL2	1	Adhesion of blood cells	0% (0/1)
2	6	1	FEM1A	4	Ccl2,CCL4,CXCL10,CXCL2	1	Cellular infiltration by myeloid cells	0% (0/1)
2	6	1	FEM1A	4	Ccl2,CCL4,CXCL10,CXCL2	1	Recruitment of myeloid cells	0% (0/1)
2	6	1	FEM1A	4	Ccl2,CCL4,CXCL10,CXCL2	1	Migration of phagocytes	0% (0/1)
2	6	1	FEM1A	4	Ccl2,CCL4,CXCL10,CXCL2	1	Cell movement of eosinophils	0% (0/1)
2	6	1	ETS1	4	CCL2,CD44,NCF1,SPP1	1	Migration of hepatic stellate cells	0% (0/1)
2	11	1	ETS1	9	Ccl2,CCL2,CD44,IL12B,MMP9,PF4,PLAU,SPI1,SPP1	1	Cell movement of dendritic cells	0% (0/1)
2	18	1	ETS1	16	CAV1,Ccl2,CCL2,CD44,CX3CL1,FCGR2A,IL12B,ITGAM,ITGB2,MMP7,MMP9,PF4,PLAU,SERPINE1,SPI1,SPP1	1	Chemotaxis	0% (0/1)
2	6	1	estrogen	4	AGT,IGF1,LGALS1,SPP1	1	Proliferation of hepatic stellate cells	0% (0/1)
2	6	1	HIRA	4	Ccl2,CXCL2,CXCL6,EREG	1	Migration of cells	0% (0/1)
2	6	1	HIRA	4	Ccl2,CXCL2,CXCL6,EREG	1	Angiogenesis	100% (1/1)
2	6	1	tetrathiomolybdate	4	ITGAM,MMP9,SERPINE1,TIMP1	1	Cell movement of neutrophils	0% (0/1)
2	6	1	zymosan A	4	Ccl2,CD80,CD86,IL12B	1	Quantity of leukocytes	100% (1/1)
2	6	1	zymosan A	4	Ccl2,CD80,CD86,IL12B	1	Activation of T lymphocytes	0% (0/1)
2	6	1	zymosan A	4	Ccl2,CD80,CD86,IL12B	1	Leukopoiesis	0% (0/1)
2	6	1	zymosan A	4	Ccl2,CD80,CD86,IL12B	1	Activation of lymphoid cells	0% (0/1)
2	6	1	zymosan A	4	Ccl2,CD80,CD86,IL12B	1	Accumulation of leukocytes	100% (1/1)
2	6	1	Irgm1	4	Ccl2,CXCL10,CXCL13,TLR2	1	Migration of antigen presenting cells	0% (0/1)
2	6	1	Irgm1	4	Ccl2,CXCL10,CXCL13,TLR2	1	Recruitment of leukocytes	0% (0/1)
2	6	1	Irgm1	4	Ccl2,CXCL10,CXCL13,TLR2	1	Binding of leukocytes	100% (1/1)
2	6	1	Irgm1	4	Ccl2,CXCL10,CXCL13,TLR2	1	Adhesion of blood cells	100% (1/1)
2	6	1	OSCAR	4	CD86,CXCL2,CXCL3,ITGAM	1	Transmigration of blood cells	0% (0/1)
2	6	1	OSCAR	4	CXCL2,CXCL3,ITGAM,MMP7	1	Migration of myeloid cells	0% (0/1)
2	6	1	hyperforin	4	CYP2D6,MGP,NTRK2,SPP1	1	Organismal death	0% (0/1)
2	6	1	chrysotile asbestos	4	Ccl9,CTSK,CTSS,MMP12	1	Quantity of antigen presenting cells	0% (0/1)
2	6	1	ceruletide	4	CXCL2,CXCL3,HMOX1,REG3A	1	Migration of myeloid cells	0% (0/1)
2	6	1	ceruletide	4	CXCL2,CXCL3,HMOX1,REG3A	1	Migration of phagocytes	0% (0/1)
2	6	1	miR-450a-5p (and other miRNAs w/seed UUUGCGA)	4	ESR1,MMP9,SERPINE1,SPP1	1	Growth of tumor	0% (0/1)
2	6	1	immethridine	4	C3,C4A/C4B,C5AR1,CD44	1	Increased Levels of Blood Urea Nitrogen	0% (0/1)
2	6	1	C1QA	4	C3,C4A/C4B,C5AR1,CD44	1	Increased Levels of Blood Urea Nitrogen	0% (0/1)
2	6	1	tetradecanoylphorbol acetate	4	AGT,C3,C5AR1,CD44	1	Increased Levels of Creatinine	0% (0/1)
2	6	1	IL6	4	AGT,C3,C5AR1,CD44	1	Increased Levels of Creatinine	100% (1/1)
2	6	1	AGT	4	Ccl2,CCL2,CCL3L3,MMP9	1	Experimental autoimmune myocarditis	0% (0/1)
2	6	1	CSF2	4	Ccl2,CCL2,CCL3L3,MMP9	1	Experimental autoimmune myocarditis	100% (1/1)
2	6	1	APP	4	Ccl2,CCL2,CCL3L3,MMP9	1	Experimental autoimmune myocarditis	0% (0/1)
2	6	1	NFkB (complex)	4	Ccl2,CCL2,CCL3L3,MMP9	1	Experimental autoimmune myocarditis	0% (0/1)
2	6	1	IL13	4	Ccl2,CCL2,CCL3L3,MMP9	1	Experimental autoimmune myocarditis	0% (0/1)
2	6	1	PD98059	4	Ccl2,CCL2,CCL3L3,MMP9	1	Experimental autoimmune myocarditis	0% (0/1)
2	6	1	IL33	4	Ccl2,CCL2,CCL3L3,MMP9	1	Experimental autoimmune myocarditis	0% (0/1)
2	6	1	poly rI:rC-RNA	4	Ccl2,CCL2,CCL3L3,MMP9	1	Experimental autoimmune myocarditis	0% (0/1)
2	6	1	U0126	4	Ccl2,CCL2,CCL3L3,MMP9	1	Experimental autoimmune myocarditis	0% (0/1)
2	6	1	TLR4	4	Ccl2,CCL2,CCL3L3,MMP9	1	Experimental autoimmune myocarditis	0% (0/1)
2	6	1	TNFSF11	4	Ccl2,CCL2,CCL3L3,MMP9	1	Experimental autoimmune myocarditis	0% (0/1)
2	6	1	IL17A	4	Ccl2,CCL2,MMP9,TBX21	1	Experimental autoimmune myocarditis	0% (0/1)
2	6	1	KLF6	4	Ccl2,CCL2,CCL3L3,MMP9	1	Experimental autoimmune myocarditis	0% (0/1)
2	6	1	hydrogen peroxide	4	Ccl2,CCL2,CCL3L3,MMP9	1	Experimental autoimmune myocarditis	0% (0/1)
2	6	1	ERK1/2	4	Ccl2,CCL2,CCL3L3,MMP9	1	Experimental autoimmune myocarditis	0% (0/1)
2	6	1	bleomycin	4	Ccl2,CCL2,CCL3L3,MMP9	1	Experimental autoimmune myocarditis	0% (0/1)
2	6	1	EGR1	4	Ccl2,CCL2,CCL3L3,MMP9	1	Experimental autoimmune myocarditis	0% (0/1)
2	6	1	PTGS2	4	Ccl2,CCL2,CCL3L3,MMP9	1	Experimental autoimmune myocarditis	0% (0/1)
2	6	1	TNFSF12	4	Ccl2,CCL2,CCL3L3,MMP9	1	Experimental autoimmune myocarditis	0% (0/1)
2	6	1	pyrrolidine dithiocarbamate	4	Ccl2,CCL2,CCL3L3,MMP9	1	Experimental autoimmune myocarditis	0% (0/1)
2	6	1	ITGB1	4	Ccl2,CCL2,CCL3L3,MMP9	1	Experimental autoimmune myocarditis	0% (0/1)
2	6	1	Bay 11-7082	4	Ccl2,CCL2,CCL3L3,MMP9	1	Experimental autoimmune myocarditis	0% (0/1)
2	6	1	CCL5	4	Ccl2,CCL2,CCL3L3,MMP9	1	Experimental autoimmune myocarditis	0% (0/1)
2	6	1	MAPKAPK2	4	Ccl2,CCL2,CCL3L3,MMP9	1	Experimental autoimmune myocarditis	0% (0/1)
2	6	1	hemozoin	4	Ccl2,CCL2,CCL3L3,MMP9	1	Experimental autoimmune myocarditis	0% (0/1)
2	6	1	apigenin	4	Ccl2,CCL2,CCL3L3,MMP9	1	Experimental autoimmune myocarditis	0% (0/1)
2	6	1	pyrrolidine dithiocarbamate	4	CXCL3,IGF1,MMP14,SLC2A1	1	Proliferation of liver cells	0% (0/1)
2	6	1	cuprizone	4	CTSB,IGF1,LGALS1,LGALS3	1	Proliferation of liver cells	0% (0/1)
2	6	1	Ccl2	4	CTSB,CXCL3,IGF1,SPP1	1	Proliferation of liver cells	0% (0/1)
2	6	1	ZNF106	4	C3,LGALS1,LGALS3,TNFRSF12A	1	Proliferation of liver cells	0% (0/1)
2	6	1	TRAF3IP2	4	AGT,CXCL3,IL18,TNFRSF12A	1	Proliferation of liver cells	0% (0/1)
1.897	12	1	STAT5a/b	10	ARG1,BCL2A1,CDKN2A,FOXP3,IGF1,LEPR,MYOM1,OSM,RAD51,TLR2	1	Organismal death	100% (1/1)
1.89	9	1	SRF	7	CD177,CYBB,HMOX1,ITGAM,MMP9,S100A8,S100A9	1	Migration of myeloid cells	100% (1/1)
1.89	9	1	TGFB1	7	CCL2,CCL4,CD44,IGF1,NCF1,SLC2A1,SPP1	1	Migration of hepatic stellate cells	100% (1/1)
1.89	9	1	cholecalciferol	7	CCL2,CD14,CXCL10,ITGAM,ITGB2,SERPINE1,SPP1	1	Recruitment of phagocytes	0% (0/1)
1.89	9	1	cholecalciferol	7	CCL2,CD14,CXCL10,ITGAM,ITGB2,SERPINE1,SPP1	1	Recruitment of myeloid cells	0% (0/1)
1.89	9	1	Creb	7	AREG,ARG1,C3AR1,CD14,CXCL10,GJA1,ITGAM	1	Cell movement of macrophages	100% (1/1)
1.89	9	1	BRD4	7	CD4,CXCL2,CXCL3,PLAU,SPP1,THBS1,THBS2	1	Chemotaxis of leukocytes	0% (0/1)
1.89	9	1	BRD4	7	CD4,CXCL2,CXCL3,PLAU,SPP1,THBS1,THBS2	1	Adhesion of immune cells	0% (0/1)
1.89	9	1	BRD4	7	CD4,CXCL2,CXCL3,PLAU,SPP1,THBS1,THBS2	1	Homing of leukocytes	0% (0/1)
1.89	9	1	BRD4	7	CD4,CXCL2,CXCL3,PLAU,SPP1,THBS1,THBS2	1	Adhesion of blood cells	0% (0/1)
1.89	9	1	TNFSF14	7	ADORA2B,Ccl2,CD86,CXCL10,CXCL3,INHBA,MMP9	1	Cellular homeostasis	100% (1/1)
1.89	9	1	FOXO1	7	Ccl2,CCL4,CXCL10,FABP4,IL18,ITGB2,TNFRSF9	1	Cell movement of eosinophils	0% (0/1)
1.871	16	1	MAPT	14	C3AR1,Ccl2,CCL2,CCL3L3,CCL4,CD44,CD74,CXCL10,IL1RN,ITGAM,ITGB2,MMP9,THBS1,TLR2	1	Recruitment of antigen presenting cells	0% (0/1)
1.809	13	1	KLF2	11	Ccl2,CCL2,CCL4,Ccl7,CXCL2,CXCL3,ITGB2,LBP,SERPINE1,SFTPD,THBS1	1	Chemotaxis of phagocytes	0% (0/1)
1.809	13	1	FOS	11	AGT,C3,C3AR1,CCNE1,CHI3L1,CTSB,CXCL3,LGALS3,PLAU,SPP1,TIMP1	1	Proliferation of liver cells	100% (1/1)
1.809	13	1	halofuginone	11	C4A/C4B,CD44,CTSK,CTSS,CXCL10,IGFBP3,LGALS1,MMP9,REG3A,SPP1,TIMP1	1	Cell movement of myeloid cells	0% (0/1)
1.809	13	1	ethanol	11	C3AR1,C5AR1,CCL2,CXCL3,ESR1,IL1RN,ITGAM,LGALS1,NTRK2,ORM1,TRH	1	Quantity of Ca2+	100% (1/1)
1.809	13	1	Bay 11-7082	11	ARG1,CCL2,CD44,F3,GJA1,HMOX1,IL18,MMP7,MMP9,SOD2,TLR2	1	Metastatic solid tumor	0% (0/1)
1.809	13	1	Bay 11-7082	11	ARG1,CCL2,CD44,F3,GJA1,HMOX1,IL18,MMP7,MMP9,SOD2,TLR2	1	Advanced malignant solid tumor	0% (0/1)
1.789	7	1	Sb202190	5	Ccl2,CCL2,CXCL10,IL12B,SPP1	1	Chemotaxis of macrophages	0% (0/1)
1.789	7	1	ETV6-RUNX1	5	CD44,CYBB,LGALS1,MMP9,SPP1	1	Cell movement of dendritic cells	0% (0/1)
1.789	7	1	homocysteine	5	Ccl2,CCL2,CXCL10,F3,HMOX1	1	Quantity of macrophages	0% (0/1)
1.789	7	1	PDGFB	5	IL1RN,MMP9,RIPK3,SPP1,THBS1	1	Cell movement of macrophages	0% (0/1)
1.789	7	1	GLIS2	5	C3,Ccl2,CXCL10,IL12B,SERPINE1	1	Infection of mammalia	0% (0/1)
1.789	7	1	IRF2	5	CD14,CXCL10,IL12B,LBP,Retnla	1	Activation of mononuclear leukocytes	0% (0/1)
1.789	7	1	CEBPB	5	CPB2,LGMN,SERPINE1,SOD2,SPP1	1	Increased Levels of Hematocrit	0% (0/1)
1.789	7	1	IFNE	5	CD80,CD83,CD86,CXCL10,PTGER2	1	Activation of leukocytes	100% (1/1)
1.789	7	1	IFNE	5	CD80,CD83,CD86,CXCL10,SLC2A1	1	Quantity of lymphatic system cells	100% (1/1)
1.789	7	1	superoxide	5	CAV1,HMOX1,MMP9,SOD2,TIMP1	1	Inflammation of body cavity	0% (0/1)
1.789	7	1	RAF1	5	CD44,CD74,CXCL3,ITGAM,MMP9	1	Recruitment of myeloid cells	0% (0/1)
1.789	7	1	RAF1	5	CD44,CD74,CXCL3,ITGAM,MMP9	1	Recruitment of phagocytes	0% (0/1)
1.789	7	1	RAF1	5	CD44,IGFBP3,IL12B,ITGAM,PLAUR	1	Damage of lung	0% (0/1)
1.789	7	1	RAF1	5	CD44,CXCL3,ITGAM,PLAU,PLAUR	1	Binding of professional phagocytic cells	0% (0/1)
1.789	7	1	RAF1	5	CD44,CD74,CXCL3,ITGAM,MMP9	1	Transmigration of blood cells	0% (0/1)
1.789	7	1	TNC	5	Ccl2,CCL2,CXCL6,EREG,MMP14	1	Angiogenesis	100% (1/1)
1.789	7	1	ELK1	5	CCL2,EGR2,MMP9,SPP1,THBS1	1	T cell migration	0% (0/1)
1.789	7	1	ELK1	5	CCL2,EGR2,MMP9,SPP1,THBS1	1	Migration of lymphatic system cells	0% (0/1)
1.789	7	1	ELK1	5	CCL2,EGR2,MMP9,SPP1,THBS1	1	Migration of mononuclear leukocytes	0% (0/1)
1.789	7	1	Cdk	5	CCL2,CXCL10,CXCL2,PHLDA1,PPARGC1A	1	Migration of cells	0% (0/1)
1.789	7	1	CARM1	5	C3,Ccl2,CXCL10,CXCL3,PTGES	1	Cell movement of macrophages	0% (0/1)
1.789	7	1	CARM1	5	C3,Ccl2,CXCL10,CXCL3,PTGES	1	Inflammatory response	0% (0/1)
1.789	7	1	CARM1	5	C3,Ccl2,CXCL10,CXCL3,PTGES	1	Activation of phagocytes	0% (0/1)
1.789	7	1	CARM1	5	C3,Ccl2,CXCL10,CXCL3,PTGES	1	Cellular infiltration by myeloid cells	0% (0/1)
1.789	7	1	CARM1	5	C3,Ccl2,CXCL10,CXCL3,PTGES	1	Cellular infiltration by phagocytes	0% (0/1)
1.789	7	1	CARM1	5	C3,Ccl2,CXCL10,CXCL3,PTGES	1	Cell movement of lymphocytes	0% (0/1)
1.789	7	1	CARM1	5	C3,Ccl2,CXCL10,CXCL3,PTGES	1	Cell movement of antigen presenting cells	0% (0/1)
1.789	7	1	CARM1	5	C3,Ccl2,CXCL10,CXCL3,PTGES	1	Activation of myeloid cells	0% (0/1)
1.789	7	1	CARM1	5	C3,Ccl2,CXCL10,CXCL3,PTGES	1	Cell movement of lymphatic system cells	0% (0/1)
1.789	7	1	NR4A3	5	Ccl2,CXCL3,FABP4,MMP12,SCG2	1	Cell movement of granulocytes	0% (0/1)
1.789	7	1	8-(4-chlorophenylthio)-guanosine-3', 5'-cyclic monophosphate	5	ALOX15,Ccl2,CCL3L3,Ccl7,PPARGC1A	1	Inflammatory response	0% (0/1)
1.789	7	1	TGFBR2	5	AREG,Ccl2,CCL3L3,CCL4,CXCL2	1	Cell movement of eosinophils	0% (0/1)
1.789	7	1	desoxycorticosterone	5	Ccl2,CYBA,CYBB,SERPINE1,SPP1	1	Growth of tumor	0% (0/1)
1.789	7	1	desoxycorticosterone	5	Ccl2,CYBB,MMP12,SERPINE1,SPP1	1	Cell movement of macrophages	100% (1/1)
1.789	7	1	NONO	5	CD80,CDKN2A,CXCL10,SIGLEC1,TNFSF8	1	Immune response of cells	0% (0/1)
1.789	7	1	PTGER2	5	CCL3L3,CXCL10,MMP9,SPP1,THBS1	1	Recruitment of antigen presenting cells	0% (0/1)
1.789	7	1	calcimycin	5	CD14,IL1RL1,LCN2,SERPINE1,TLR2	1	Cell movement of neutrophils	100% (1/1)
1.789	7	1	calcimycin	5	IL12B,INHBA,LCN2,SERPINE1,TLR2	1	Chemotaxis of phagocytes	0% (0/1)
1.789	7	1	calcimycin	5	IL12B,INHBA,LCN2,SERPINE1,TLR2	1	Chemotaxis of myeloid cells	0% (0/1)
1.768	10	1	NPC1	8	CCL3L3,ITGAX,LGALS3,LIPA,MMP14,S100A8,S100A9,TGFBR1	1	Migration of myeloid cells	0% (0/1)
1.768	10	1	daidzein	8	ARG1,CD4,CD86,ESR1,FCGR2B,HLA-DQA1,ITGB2,SH2B2	1	Lymphopoiesis	0% (0/1)
1.732	5	1	WLS	3	Ccl2,CCL22,CXCL2	1	Chemotaxis of phagocytes	0% (0/1)
1.732	5	1	WLS	3	Ccl2,CCL22,CXCL2	1	Quantity of leukocytes	100% (1/1)
1.732	5	1	WLS	3	Ccl2,CCL22,CXCL2	1	Chemotaxis of leukocytes	0% (0/1)
1.732	5	1	WLS	3	Ccl2,CCL22,CXCL2	1	Chemotaxis of myeloid cells	0% (0/1)
1.732	5	1	WLS	3	Ccl2,CCL22,CXCL2	1	Chemotaxis	0% (0/1)
1.732	5	1	WLS	3	Ccl2,CCL22,CXCL2	1	Cellular infiltration by leukocytes	100% (1/1)
1.732	5	1	WLS	3	Ccl2,CCL22,CXCL2	1	Recruitment of phagocytes	0% (0/1)
1.732	5	1	WLS	3	Ccl2,CCL22,CXCL2	1	Adhesion of immune cells	0% (0/1)
1.732	5	1	WLS	3	Ccl2,CCL22,CXCL2	1	Homing of leukocytes	0% (0/1)
1.732	5	1	WLS	3	Ccl2,CCL22,CXCL2	1	Accumulation of leukocytes	0% (0/1)
1.732	5	1	WLS	3	Ccl2,CCL22,CXCL2	1	Adhesion of blood cells	0% (0/1)
1.732	5	1	WLS	3	Ccl2,CCL22,CXCL2	1	Recruitment of myeloid cells	0% (0/1)
1.732	5	1	WLS	3	Ccl2,CCL22,CXCL2	1	Migration of phagocytes	0% (0/1)
1.732	5	1	WLS	3	Ccl2,CCL22,CXCL2	1	Transmigration of cells	0% (0/1)
1.732	5	1	prednisolone	3	Ccl2,CCL2,ITGAM	1	Extravasation	100% (1/1)
1.732	5	1	TFRC	3	HMOX1,ITGAM,ITGB2	1	Response of myeloid leukocytes	0% (0/1)
1.732	5	1	Mn(III)-tetrakis-(4-benzoic acid) porphyrin	3	AGT,MSR1,SERPINE1	1	Activation of cells	0% (0/1)
1.732	5	1	Mn(III)-tetrakis-(4-benzoic acid) porphyrin	3	AGT,MSR1,SERPINE1	1	Inflammatory response	0% (0/1)
1.732	5	1	NLRP12	3	CXCL13,CXCL2,CXCL6	1	Chemotaxis of leukocytes	100% (1/1)
1.732	5	1	NLRP12	3	CXCL13,CXCL2,CXCL6	1	Homing of leukocytes	100% (1/1)
1.732	5	1	NLRP12	3	CXCL13,CXCL2,CXCL6	1	Mobilization of Ca2+	0% (0/1)
1.732	5	1	BMP6	3	CD44,HMOX1,INHBA	1	Activation of macrophages	0% (0/1)
1.732	5	1	BMP6	3	CD44,HMOX1,SERPINE1	1	Migration of myeloid cells	0% (0/1)
1.732	5	1	BMP6	3	HMOX1,SERPINE1,TMPRSS6	1	Increased Levels of Hematocrit	0% (0/1)
1.732	5	1	ECSIT	3	CD44,HMOX1,PLAUR	1	Phagocytosis of phagocytes	0% (0/1)
1.732	5	1	ECSIT	3	CD44,HMOX1,PLAUR	1	Immune response of phagocytes	0% (0/1)
1.732	5	1	ECSIT	3	CD44,HMOX1,PLAUR	1	Phagocytosis of leukocytes	0% (0/1)
1.732	5	1	ECSIT	3	CD44,HMOX1,PLAUR	1	Response of phagocytes	0% (0/1)
1.732	5	1	ECSIT	3	CD44,HMOX1,PLAUR	1	Phagocytosis of myeloid cells	0% (0/1)
1.732	5	1	ECSIT	3	CD44,HMOX1,PLAUR	1	Migration of myeloid cells	0% (0/1)
1.732	5	1	ECSIT	3	CD44,HMOX1,PLAUR	1	Engulfment of myeloid cells	0% (0/1)
1.732	5	1	ECSIT	3	CD44,HMOX1,PLAUR	1	Response of antigen presenting cells	0% (0/1)
1.732	5	1	sodium orthovanadate	3	CCL2,PLAUR,SERPINE1	1	Cell movement of mononuclear leukocytes	100% (1/1)
1.732	5	1	sodium orthovanadate	3	MSR1,PLAUR,SERPINE1	1	Infection of mammalia	0% (0/1)
1.732	5	1	sodium orthovanadate	3	CCL2,PLAUR,SERPINE1	1	Chemotaxis of phagocytes	0% (0/1)
1.732	5	1	sodium orthovanadate	3	CCL2,PLAUR,SERPINE1	1	Chemotaxis of myeloid cells	0% (0/1)
1.732	5	1	sodium orthovanadate	3	CCL2,PLAUR,SERPINE1	1	Migration of phagocytes	0% (0/1)
1.732	5	1	sodium orthovanadate	3	CCL2,PLAUR,SERPINE1	1	Migration of myeloid cells	0% (0/1)
1.732	5	1	Collagen type I (complex)	3	MMP14,MMP9,PLAU	1	Migration of myeloid cells	0% (0/1)
1.732	5	1	TGFB3	3	MMP9,PLAUR,SERPINE1	1	Migration of myeloid cells	0% (0/1)
1.732	5	1	GNRH1	3	DUSP4,FOSB,IGF1	1	Growth of connective tissue	0% (0/1)
1.732	5	1	tofacitinib	3	CCL2,CXCL10,IL12B	1	Chemotaxis of macrophages	0% (0/1)
1.732	5	1	tofacitinib	3	CCL2,CXCL10,IL12B	1	Quantity of macrophages	0% (0/1)
1.732	5	1	tofacitinib	3	CCL2,CXCL10,IL12B	1	Activation of leukocytes	0% (0/1)
1.732	5	1	tofacitinib	3	CCL2,CXCL10,IL12B	1	Chemotaxis of phagocytes	0% (0/1)
1.732	5	1	tofacitinib	3	CCL2,CXCL10,IL12B	1	Quantity of lymphatic system cells	100% (1/1)
1.732	5	1	tofacitinib	3	CCL2,CXCL10,IL12B	1	Cell movement of eosinophils	0% (0/1)
1.732	5	1	tofacitinib	3	CCL2,CXCL10,IL12B	1	Hematopoiesis of mononuclear leukocytes	100% (1/1)
1.732	5	1	tofacitinib	3	CCL2,CXCL10,IL12B	1	Chemotaxis of myeloid cells	0% (0/1)
1.732	5	1	tofacitinib	3	CCL2,CXCL10,IL12B	1	Cellular infiltration by leukocytes	0% (0/1)
1.732	5	1	tofacitinib	3	CCL2,CXCL10,IL12B	1	Immune response of leukocytes	0% (0/1)
1.732	5	1	tofacitinib	3	CCL2,CXCL10,IL12B	1	T cell migration	0% (0/1)
1.732	5	1	tofacitinib	3	CCL2,CXCL10,IL12B	1	Migration of antigen presenting cells	0% (0/1)
1.732	5	1	tofacitinib	3	CCL2,CXCL10,IL12B	1	Chemotaxis of antigen presenting cells	0% (0/1)
1.732	5	1	tofacitinib	3	CCL2,CXCL10,IL12B	1	Migration of lymphatic system cells	0% (0/1)
1.732	5	1	tofacitinib	3	CCL2,CXCL10,IL12B	1	Accumulation of leukocytes	0% (0/1)
1.732	5	1	tofacitinib	3	CCL2,CXCL10,IL12B	1	Cellular infiltration by myeloid cells	0% (0/1)
1.732	5	1	tofacitinib	3	CCL2,CXCL10,IL12B	1	Migration of mononuclear leukocytes	0% (0/1)
1.732	5	1	tofacitinib	3	CCL2,CXCL10,IL12B	1	Migration of phagocytes	0% (0/1)
1.732	5	1	tofacitinib	3	CCL2,CXCL10,IL12B	1	Cell movement of dendritic cells	0% (0/1)
1.732	5	1	IKBKE	3	CXCL10,CXCL2,MMP9	1	Infiltration by neutrophils	0% (0/1)
1.732	5	1	BCR (complex)	3	CCL4,CD44,SLC2A1	1	Migration of hepatic stellate cells	0% (0/1)
1.732	5	1	cyclic AMP	3	F3,SERPINE1,SOD2	1	Increased Levels of Hematocrit	0% (0/1)
1.732	5	1	CD3E	3	CCL17,CCL22,MMP9	1	Accumulation of leukocytes	0% (0/1)
1.732	5	1	CD3E	3	CCL17,CCL22,MMP9	1	Migration of phagocytes	0% (0/1)
1.732	5	1	CD3E	3	CCL17,CCL22,MMP9	1	Migration of antigen presenting cells	0% (0/1)
1.732	5	1	MAPKAPK3	3	CDKN2A,CXCL2,CXCL3	1	Transport of molecule	0% (0/1)
1.732	5	1	MAPKAPK3	3	CCL3L3,CXCL2,CXCL3	1	Cell movement of neutrophils	0% (0/1)
1.732	5	1	MAPKAPK3	3	CCL3L3,CXCL2,CXCL3	1	Chemotaxis of phagocytes	0% (0/1)
1.732	5	1	MAPKAPK3	3	CCL3L3,CXCL2,CXCL3	1	Chemotaxis of granulocytes	0% (0/1)
1.732	5	1	MAPKAPK3	3	CCL3L3,CXCL2,CXCL3	1	Chemotaxis of myeloid cells	0% (0/1)
1.732	5	1	MAPKAPK3	3	CCL3L3,CXCL2,CXCL3	1	Cellular infiltration by leukocytes	0% (0/1)
1.732	5	1	MAPKAPK3	3	CCL3L3,CXCL2,CXCL3	1	Recruitment of phagocytes	0% (0/1)
1.732	5	1	MAPKAPK3	3	CCL3L3,CXCL2,CXCL3	1	Adhesion of immune cells	0% (0/1)
1.732	5	1	MAPKAPK3	3	CCL3L3,CXCL2,CXCL3	1	Homing of leukocytes	0% (0/1)
1.732	5	1	MAPKAPK3	3	CCL3L3,CXCL2,CXCL3	1	Adhesion of blood cells	0% (0/1)
1.732	5	1	MAPKAPK3	3	CCL3L3,CXCL2,CXCL3	1	Accumulation of leukocytes	0% (0/1)
1.732	5	1	MAPKAPK3	3	CCL3L3,CXCL2,CXCL3	1	Recruitment of myeloid cells	0% (0/1)
1.732	5	1	MAPKAPK3	3	CCL3L3,CXCL2,CXCL3	1	Migration of phagocytes	0% (0/1)
1.732	5	1	MAPKAPK3	3	CCL3L3,CXCL2,CXCL3	1	Mobilization of Ca2+	0% (0/1)
1.732	5	1	MAPKAPK3	3	CCL3L3,CXCL2,CXCL3	1	Transmigration of blood cells	0% (0/1)
1.732	5	1	MAPKAPK3	3	CCL3L3,CXCL2,CXCL3	1	Migration of myeloid cells	0% (0/1)
1.732	5	1	MAPKAPK3	3	CCL3L3,CXCL2,CXCL3	1	Accumulation of myeloid cells	0% (0/1)
1.732	5	1	CDK9	3	CCNB1,MMP9,PPARGC1A	1	Proliferation of muscle cells	0% (0/1)
1.732	5	1	ponesimod	3	CCL2,S1PR3,SERPINE1	1	Cellular homeostasis	0% (0/1)
1.732	5	1	ponesimod	3	CCL2,SERPINE1,THBS1	1	Development of head	0% (0/1)
1.732	5	1	ponesimod	3	CCL2,SERPINE1,THBS1	1	Cell movement of macrophages	0% (0/1)
1.732	5	1	ponesimod	3	CCL2,SERPINE1,THBS1	1	Recruitment of phagocytes	0% (0/1)
1.732	5	1	ponesimod	3	CCL2,SERPINE1,THBS1	1	Binding of tumor cell lines	0% (0/1)
1.732	5	1	ponesimod	3	CCL2,SERPINE1,THBS1	1	Recruitment of myeloid cells	0% (0/1)
1.732	5	1	ponesimod	3	CCL2,SERPINE1,THBS1	1	Chemotaxis of phagocytes	0% (0/1)
1.732	5	1	ponesimod	3	CCL2,SERPINE1,THBS1	1	Chemotaxis of myeloid cells	0% (0/1)
1.732	5	1	eltanexor	3	CCNE1,CDC6,RAD51	1	Growth of tumor	0% (0/1)
1.732	5	1	maraviroc	3	Ccl2,CCL4,CXCL10	1	Quantity of leukocytes	0% (0/1)
1.732	5	1	maraviroc	3	Ccl2,CCL4,CXCL10	1	Activation of macrophages	0% (0/1)
1.732	5	1	maraviroc	3	Ccl2,CCL4,CXCL10	1	Chemotaxis of macrophages	0% (0/1)
1.732	5	1	maraviroc	3	Ccl2,CCL4,CXCL10	1	Chemotaxis of phagocytes	0% (0/1)
1.732	5	1	maraviroc	3	Ccl2,CCL4,CXCL10	1	Cell movement of neutrophils	0% (0/1)
1.732	5	1	maraviroc	3	Ccl2,CCL4,CXCL10	1	Chemotaxis of myeloid cells	0% (0/1)
1.732	5	1	maraviroc	3	Ccl2,CCL4,CXCL10	1	Cellular infiltration by phagocytes	0% (0/1)
1.732	5	1	maraviroc	3	Ccl2,CCL4,CXCL10	1	T cell migration	0% (0/1)
1.732	5	1	maraviroc	3	Ccl2,CCL4,CXCL10	1	Migration of antigen presenting cells	0% (0/1)
1.732	5	1	maraviroc	3	Ccl2,CCL4,CXCL10	1	Hypersensitive reaction	0% (0/1)
1.732	5	1	maraviroc	3	Ccl2,CCL4,CXCL10	1	Recruitment of phagocytes	0% (0/1)
1.732	5	1	maraviroc	3	Ccl2,CCL4,CXCL10	1	Binding of leukocytes	0% (0/1)
1.732	5	1	maraviroc	3	Ccl2,CCL4,CXCL10	1	Chemotaxis of antigen presenting cells	0% (0/1)
1.732	5	1	maraviroc	3	Ccl2,CCL4,CXCL10	1	Activation of myeloid cells	0% (0/1)
1.732	5	1	maraviroc	3	Ccl2,CCL4,CXCL10	1	Migration of lymphatic system cells	0% (0/1)
1.732	5	1	maraviroc	3	Ccl2,CCL4,CXCL10	1	Activation of antigen presenting cells	0% (0/1)
1.732	5	1	maraviroc	3	Ccl2,CCL4,CXCL10	1	Adhesion of blood cells	0% (0/1)
1.732	5	1	maraviroc	3	Ccl2,CCL4,CXCL10	1	Cellular infiltration by granulocytes	0% (0/1)
1.732	5	1	maraviroc	3	Ccl2,CCL4,CXCL10	1	Migration of mononuclear leukocytes	0% (0/1)
1.732	5	1	maraviroc	3	Ccl2,CCL4,CXCL10	1	Recruitment of myeloid cells	0% (0/1)
1.732	5	1	maraviroc	3	Ccl2,CCL4,CXCL10	1	Migration of phagocytes	0% (0/1)
1.732	5	1	maraviroc	3	Ccl2,CCL4,CXCL10	1	Recruitment of antigen presenting cells	0% (0/1)
1.732	5	1	maraviroc	3	Ccl2,CCL4,CXCL10	1	Cell movement of eosinophils	0% (0/1)
1.732	5	1	candesartan	3	Ccl2,SERPINE1,SPP1	1	Chemotaxis of phagocytes	0% (0/1)
1.732	5	1	candesartan	3	Ccl2,SERPINE1,SPP1	1	Chemotaxis of myeloid cells	0% (0/1)
1.732	5	1	2-mercaptoacetate	3	CXCL2,CXCL3,IGF1	1	Transmigration of cells	0% (0/1)
1.732	5	1	ADIPOQ	3	Ccl2,CCL2,MMP9	1	Experimental autoimmune myocarditis	0% (0/1)
1.732	5	1	2-[[9-isopropyl-6-[[4-(2-pyridyl)phenyl]methylamino]purin-2-yl]amino]butan-1-ol	3	Ccl2,CCL3L3,CD86	1	Quantity of leukocytes	0% (0/1)
1.732	5	1	2-[[9-isopropyl-6-[[4-(2-pyridyl)phenyl]methylamino]purin-2-yl]amino]butan-1-ol	3	Ccl2,CCL3L3,CD86	1	Activation of cells	100% (1/1)
1.732	5	1	2-[[9-isopropyl-6-[[4-(2-pyridyl)phenyl]methylamino]purin-2-yl]amino]butan-1-ol	3	Ccl2,CCL3L3,CD86	1	Adhesion of immune cells	0% (0/1)
1.732	5	1	2-[[9-isopropyl-6-[[4-(2-pyridyl)phenyl]methylamino]purin-2-yl]amino]butan-1-ol	3	Ccl2,CCL3L3,CD86	1	Accumulation of leukocytes	0% (0/1)
1.732	5	1	2-[[9-isopropyl-6-[[4-(2-pyridyl)phenyl]methylamino]purin-2-yl]amino]butan-1-ol	3	Ccl2,CCL3L3,CD86	1	Adhesion of blood cells	0% (0/1)
1.732	5	1	2-[[9-isopropyl-6-[[4-(2-pyridyl)phenyl]methylamino]purin-2-yl]amino]butan-1-ol	3	Ccl2,CCL3L3,CD86	1	Transmigration of blood cells	0% (0/1)
1.732	5	1	Cyp4a14	3	Ccl2,CXCL10,CXCL3	1	Cell movement of macrophages	0% (0/1)
1.732	5	1	Cyp4a14	3	Ccl2,CXCL10,CXCL3	1	Activation of phagocytes	0% (0/1)
1.732	5	1	Cyp4a14	3	Ccl2,CXCL10,CXCL3	1	Chemotaxis of phagocytes	0% (0/1)
1.732	5	1	Cyp4a14	3	Ccl2,CXCL10,CXCL3	1	Cell movement of neutrophils	0% (0/1)
1.732	5	1	Cyp4a14	3	Ccl2,CXCL10,CXCL3	1	Leukopoiesis	0% (0/1)
1.732	5	1	Cyp4a14	3	Ccl2,CXCL10,CXCL3	1	Chemotaxis of granulocytes	0% (0/1)
1.732	5	1	Cyp4a14	3	Ccl2,CXCL10,CXCL3	1	Cellular infiltration by phagocytes	0% (0/1)
1.732	5	1	Cyp4a14	3	Ccl2,CXCL10,CXCL3	1	Immune response of leukocytes	0% (0/1)
1.732	5	1	Cyp4a14	3	Ccl2,CXCL10,CXCL3	1	Lymphocyte migration	0% (0/1)
1.732	5	1	Cyp4a14	3	Ccl2,CXCL10,CXCL3	1	Migration of antigen presenting cells	0% (0/1)
1.732	5	1	Cyp4a14	3	Ccl2,CXCL10,CXCL3	1	Recruitment of phagocytes	0% (0/1)
1.732	5	1	Cyp4a14	3	Ccl2,CXCL10,CXCL3	1	Binding of leukocytes	0% (0/1)
1.732	5	1	Cyp4a14	3	Ccl2,CXCL10,CXCL3	1	Homing of leukocytes	0% (0/1)
1.732	5	1	Cyp4a14	3	Ccl2,CXCL10,CXCL3	1	Activation of myeloid cells	0% (0/1)
1.732	5	1	Cyp4a14	3	Ccl2,CXCL10,CXCL3	1	Migration of lymphatic system cells	0% (0/1)
1.732	5	1	Cyp4a14	3	Ccl2,CXCL10,CXCL3	1	Accumulation of leukocytes	0% (0/1)
1.732	5	1	Cyp4a14	3	Ccl2,CXCL10,CXCL3	1	Adhesion of blood cells	0% (0/1)
1.732	5	1	Cyp4a14	3	Ccl2,CXCL10,CXCL3	1	Cellular infiltration by granulocytes	0% (0/1)
1.732	5	1	Cyp4a14	3	Ccl2,CXCL10,CXCL3	1	Migration of mononuclear leukocytes	0% (0/1)
1.732	5	1	Cyp4a14	3	Ccl2,CXCL10,CXCL3	1	Recruitment of myeloid cells	0% (0/1)
1.732	5	1	Cyp4a14	3	Ccl2,CXCL10,CXCL3	1	Migration of phagocytes	0% (0/1)
1.732	5	1	lisinopril	3	CYBB,ITGB2,S100A8	1	Synthesis of reactive oxygen species	0% (0/1)
1.732	5	1	lisinopril	3	CYBB,ITGB2,S100A9	1	Degranulation	0% (0/1)
1.732	5	1	TSC1	3	CTSK,HMOX1,PLAU	1	Cellular infiltration by macrophages	0% (0/1)
1.732	5	1	SCGB3A2	3	CTSS,MMP12,MMP14	1	Migration of phagocytes	0% (0/1)
1.732	5	1	SCGB3A2	3	CTSD,CTSS,MMP12	1	Quantity of leukocytes	0% (0/1)
1.732	5	1	SCGB3A2	3	CTSS,MMP12,MMP14	1	Cell movement of myeloid cells	0% (0/1)
1.732	5	1	SCGB3A2	3	CTSS,MMP12,MMP14	1	Cell movement of mononuclear leukocytes	0% (0/1)
1.732	5	1	VEGFA	3	CTSB,SPP1,TIMP1	1	Proliferation of hepatic stellate cells	0% (0/1)
1.732	5	1	NOTCH4	3	IL12B,SERPINE1,TEK	1	Chemotaxis	0% (0/1)
1.732	5	1	NOTCH4	3	CD80,CD86,IL12B	1	Accumulation of leukocytes	0% (0/1)
1.732	5	1	NOTCH4	3	CD80,CD86,IL12B	1	Stimulation of cells	0% (0/1)
1.732	5	1	LPL	3	CX3CL1,MSR1,THBS1	1	Engulfment of phagocytes	0% (0/1)
1.732	5	1	LPL	3	CX3CL1,MSR1,THBS1	1	Phagocytosis of leukocytes	0% (0/1)
1.732	5	1	LPL	3	CX3CL1,MSR1,THBS1	1	Engulfment of myeloid cells	0% (0/1)
1.732	5	1	LLGL2	3	ITGB2,NDRG1,SERPINE1	1	Cell movement of macrophages	0% (0/1)
1.732	5	1	LLGL2	3	ITGB2,NDRG1,SERPINE1	1	Angiogenesis	0% (0/1)
1.732	5	1	LLGL2	3	ITGB2,NDRG1,SERPINE1	1	Cell movement of myeloid cells	0% (0/1)
1.732	5	1	LLGL2	3	ITGB2,NDRG1,SERPINE1	1	Cell movement of antigen presenting cells	0% (0/1)
1.732	5	1	Ptprd	3	Ccl2,CCL2,GADD45G	1	Leukopoiesis	0% (0/1)
1.732	5	1	Ptprd	3	A2M,Ccl2,CCL2	1	Chemotaxis	0% (0/1)
1.732	5	1	curcumin	3	Ccl2,CCL2,MMP9	1	Experimental autoimmune myocarditis	0% (0/1)
1.732	5	1	IL15	3	CCL2,CCL4,CD44	1	Migration of hepatic stellate cells	0% (0/1)
1.732	5	1	SKIV2L	3	GLRX,S100A8,S100A9	1	Adhesion of immune cells	0% (0/1)
1.732	5	1	SKIV2L	3	GLRX,S100A8,S100A9	1	Adhesion of blood cells	0% (0/1)
1.732	5	1	SKIV2L	3	GLRX,S100A8,S100A9	1	Binding of myeloid cells	0% (0/1)
1.732	5	1	SKIV2L	3	GLRX,S100A8,S100A9	1	Binding of professional phagocytic cells	0% (0/1)
1.732	5	1	MOGAT1	3	Ccl2,CXCL10,TIMP1	1	Cell movement of neutrophils	0% (0/1)
1.732	5	1	MOGAT1	3	Ccl2,CXCL10,TIMP1	1	Cellular infiltration by granulocytes	0% (0/1)
1.732	5	1	MOGAT1	3	Ccl2,CXCL10,TIMP1	1	Cellular infiltration by phagocytes	0% (0/1)
1.732	5	1	collagen type i (family)	3	CCL2,HTR2B,SERPINE1	1	Growth of connective tissue	0% (0/1)
1.732	5	1	collagen type i (family)	3	CCL2,MMP19,SERPINE1	1	Binding of tumor cell lines	0% (0/1)
1.732	5	1	WWTR1-CAMTA1	3	CXCL2,Ly6a (includes others),SERPINE1	1	Cell movement of leukocytes	0% (0/1)
1.732	5	1	tomatidine	3	CTSK,MMP9,TNFRSF11A	1	Growth of tumor	0% (0/1)
1.732	5	1	tomatidine	3	CTSK,MMP9,TNFRSF11A	1	Quantity of macrophages	0% (0/1)
1.732	5	1	CHEK1	3	BUB1B,CIP2A,RRM2	1	Growth of tumor	100% (1/1)
1.732	5	1	DUSP1	3	Ccl2,CCL2,CCL3L3	1	Experimental autoimmune myocarditis	0% (0/1)
1.732	5	1	IL2	3	C3,CD44,TLR2	1	Reperfusion injury of kidney	0% (0/1)
1.732	5	1	miR-125b-5p (and other miRNAs w/seed CCCUGAG)	3	Ccl2,CD44,SGPL1	1	T cell migration	0% (0/1)
1.732	5	1	genistein	3	CTSB,IGF1,SPP1	1	Proliferation of hepatic stellate cells	100% (1/1)
1.732	5	1	SUPT20H	3	BCL2A1,CCL1,CCL4	1	Cellular homeostasis	100% (1/1)
1.732	5	1	SUPT20H	3	BCL2A1,CCL1,CCL4	1	Inflammatory response	0% (0/1)
1.732	5	1	CALCA	3	CCL2,CD44,IRF5	1	Accumulation of neutrophils	0% (0/1)
1.732	5	1	AGT	3	HMOX1,ITGB2,RIPK3	1	Increased Levels of LDH	0% (0/1)
1.732	5	1	CEBPA	3	CFD,CPB2,HMOX1	1	Increased Levels of LDH	0% (0/1)
1.667	11	1	REL	9	CCL2,CD80,CD86,CXCL10,CXCL3,ESR1,IL12B,IL18,SOD2	1	Stimulation of cells	0% (0/1)
1.667	11	1	IKBKB	9	C3,CCL11,CD44,CXCL10,CXCL3,F3,LCN2,PLAU,PTX3	1	Response of granulocytes	0% (0/1)
1.667	11	1	Pro-inflammatory Cytokine	9	APOE,CXCL13,HMOX1,HP,LCN2,LGALS1,MMP9,TIMP1,TLR2	1	Cell movement of phagocytes	100% (1/1)
1.667	11	1	RHOA	9	AGT,CCNE1,CDKN2A,CXCL10,ECT2,ESR1,MMP14,MMP9,PLAU	1	Angiogenesis	100% (1/1)
1.667	11	1	CHUK	9	C3,CCL11,Ccl2,CCL2,CCL3L3,CCL4,CXCL10,CXCL2,IL12B	1	Cell movement of eosinophils	0% (0/1)
1.664	15	1	NFKB1	13	APOE,Ccl2,CCL2,CCL22,CCL3L3,CCL4,CD44,CXCL10,CXCL3,IL1RN,LGALS1,MMP9,TLR2	1	Recruitment of antigen presenting cells	100% (1/1)
1.664	15	1	ERK	13	AREG,Ccl2,CCL2,CTSK,EGR2,ITGAM,LCN2,MAFB,MMP14,PLAU,SERPINE1,THBS1,TIMP1	1	Development of head	100% (1/1)
1.633	8	1	TYROBP	6	CCL2,CD86,FCGR2B,IL18,ITGAM,ITGAX	1	Immune response of phagocytes	100% (1/1)
1.633	8	1	lactosylceramide	6	Ccl2,CXCL10,HLA-DQA1,IL12B,TLR2,TNFRSF11A	1	Leukopoiesis	0% (0/1)
1.633	8	1	nystatin	6	CCL3L3,CD80,CD86,IL12B,LCN2,SPP1	1	Cellular homeostasis	0% (0/1)
1.633	8	1	N-cor	6	CTSB,CXCL10,CXCL2,FABP4,MMP12,MMP9	1	Infiltration by neutrophils	0% (0/1)
1.633	8	1	N-cor	6	CTSB,CXCL10,CXCL2,FABP4,MMP12,MMP9	1	Cell movement of neutrophils	0% (0/1)
1.633	8	1	N-cor	6	CTSB,CXCL10,CXCL2,FABP4,MMP12,MMP9	1	Cellular infiltration by phagocytes	100% (1/1)
1.581	12	1	IL1RN	10	CCL2,CD44,CTSS,GJA1,IGF1,MMP9,S100A9,SERPINE1,SPP1,TIMP1	1	Atherosclerosis	0% (0/1)
1.512	9	1	etoposide	7	BCL2A1,CCL2,CD80,CD86,CXCL10,CXCL2,CXCL3	1	Accumulation of leukocytes	0% (0/1)
1.512	9	1	JUNB	7	CAV1,CCL3L3,CD44,CXCL2,CXCL3,MMP9,SERPINE1	1	Transmigration of blood cells	0% (0/1)
1.512	9	1	SP1	7	APOE,F3,HMOX1,SERPINE1,SLC11A1,SOD2,SPP1	1	Increased Levels of Hematocrit	0% (0/1)
1.512	9	1	GNAQ	7	Ccl2,CD44,IL1RN,LGALS3,PLAUR,PTX3,SERPINE1	1	Infection of mammalia	0% (0/1)
1.512	9	1	GNAQ	7	Ccl2,CD44,CX3CL1,LGALS3,PLAUR,PTX3,SERPINE1	1	Phagocytosis	0% (0/1)
1.512	9	1	NFkB (family)	7	CCL2,DCSTAMP,ESR1,IL18,MMP9,RRM2,TIMP1	1	Intrathoracic organ tumor	100% (1/1)
1.512	9	1	NFkB (family)	7	CCL2,DCSTAMP,ESR1,IL18,MMP9,RRM2,TIMP1	1	Lung tumor	100% (1/1)
1.512	9	1	NFkB (family)	7	CCL2,DCSTAMP,ESR1,IL18,MMP9,RRM2,TIMP1	1	Thoracic neoplasm	100% (1/1)
1.5	6	1	APOA1	4	APOE,Ccl2,ITGAM,TLR2	1	Recruitment of antigen presenting cells	0% (0/1)
1.5	6	1	CDKN1A	4	CCL2,CCL3L3,LGALS3,TREM1	1	Chemotaxis of macrophages	100% (1/1)
1.5	6	1	CDKN1A	4	CCL2,CCL3L3,CXCL2,LGALS3	1	Cell movement of eosinophils	0% (0/1)
1.5	6	1	CG	4	CCL2,IGF1,SLC2A1,SPP1	1	Migration of hepatic stellate cells	0% (0/1)
1.5	6	1	beta-estradiol	4	C3,CD44,THBS1,TLR2	1	Reperfusion injury of kidney	0% (0/1)
1.5	6	1	GPER1	4	ESR1,FOSB,IGF1,SLC2A1	1	Quantity of lymphatic system cells	0% (0/1)
1.5	6	1	IFNL1	4	CXCL10,CXCL11,IL12B,TLR2	1	Chemotaxis of leukocytes	0% (0/1)
1.5	6	1	IFNL1	4	CXCL10,CXCL11,IL12B,TLR2	1	Homing of leukocytes	0% (0/1)
1.5	6	1	IFNL1	4	CD80,CXCL10,IL12B,TLR2	1	Accumulation of leukocytes	0% (0/1)
1.5	6	1	IFNL1	4	CXCL10,CXCL11,IL12B,TLR2	1	T cell migration	0% (0/1)
1.5	6	1	ANXA7	4	IGF1,IL12B,ITGAM,TEK	1	Chemotaxis	0% (0/1)
1.5	6	1	ANXA7	4	ALOX15,IGF1,IL12B,ITGAM	1	Damage of lung	0% (0/1)
1.5	6	1	IKZF2	4	BATF,FOXP3,Ly6a (includes others),TNFRSF9	1	T cell migration	0% (0/1)
1.5	6	1	CD40	4	CCL2,CCL4,CD44,SLC2A1	1	Migration of hepatic stellate cells	0% (0/1)
1.5	6	1	tretinoin	4	AGT,C3,C5AR1,CD44	1	Increased Levels of Blood Urea Nitrogen	0% (0/1)
1.443	14	1	TCL1A	12	C1QA,CD300LD,CXCL3,CYBB,ITGAM,ITGB2,Ly6a (includes others),MARCO,MSR1,RGS1,S100A8,S100A9	1	Adhesion of immune cells	0% (0/1)
1.414	10	1	IFN Beta	8	C3AR1,Ccl2,CCL2,CD74,CXCL10,CYBB,SPP1,THBS1	1	Chemotaxis of macrophages	0% (0/1)
1.387	15	1	Mapk	13	CCL2,CLDN4,CYBB,ESR1,F3,GJA1,HMOX1,IGF1,MMP7,MMP9,S100A8,SNCG,SPP1	1	Organismal death	0% (0/1)
1.342	7	1	RORA	5	Ccl2,CCL3L3,CCL4,LCN2,S100A9	1	Extravasation	0% (0/1)
1.342	7	1	TSH	5	Ccl2,CTSS,IGFBP3,IL1RN,SLC2A1	1	Quantity of leukocytes	0% (0/1)
1.342	7	1	butyric acid	5	IL12B,MMP7,PLAU,SPP1,TLR2	1	Chemotaxis of antigen presenting cells	0% (0/1)
1.342	7	1	fulvestrant	5	C3,CAV1,CCL2,CXCL10,IGF1	1	Lung injury	100% (1/1)
1.342	7	1	EPAS1	5	AREG,CXCL2,FABP4,IGFBP3,TNFRSF9	1	Cell movement of eosinophils	0% (0/1)
1.342	7	1	RXRB	5	CCL17,CCL22,CTSS,CXCL10,SPP1	1	T cell migration	0% (0/1)
1.342	7	1	RXRB	5	CCL17,CCL22,CTSS,CXCL10,SPP1	1	Migration of mononuclear leukocytes	0% (0/1)
1.342	7	1	RXRB	5	CCL17,CCL22,CTSS,CXCL10,SPP1	1	Migration of lymphatic system cells	0% (0/1)
1.342	7	1	RXRB	5	CCL17,CCL22,CXCL10,MARCO,SPP1	1	Cell movement of dendritic cells	0% (0/1)
1.342	7	1	FOXO3	5	CXCL10,ITGAM,ITGB2,LCN2,SERPINB1	1	Chemotaxis of granulocytes	0% (0/1)
1.342	7	1	PGF	5	CCL2,CCL28,EREG,MMP9,SERPINE1	1	Inflammation of gastrointestinal tract	0% (0/1)
1.291	17	1	tyrphostin AG490	15	AGT,CCL2,CFTR,CXCL2,DCSTAMP,ESR1,FOXP3,IGF1,IGF2,MMP9,MYH11,PTX3,SOD2,SPP1,TIMP1	1	Respiratory system tumor	0% (0/1)
1.225	8	1	HNRNPU	6	CCL2,CD5L,HBB,IGF1,IL18,MMP12	1	Lung injury	0% (0/1)
1.225	8	1	decitabine	6	CD44,CXCL10,CXCL3,GLRX,ITGAX,THBS1	1	Response of neutrophils	0% (0/1)
1.225	8	1	E2F6	6	CCNE1,GJA1,PCLAF,RAD51,RYR2,SERPINE1	1	Organismal death	100% (1/1)
1.225	8	1	IL3	6	CCL11,CCL17,CCL2,ITGAM,ITGAX,TLR2	1	Migration of myeloid cells	100% (1/1)
1.206	13	1	PSEN1	11	APOE,C3,C3AR1,CCL3L3,CCL4,CD74,CTSS,CXCL2,GJA1,IGF1,MMP9	1	Transmigration of cells	0% (0/1)
1.155	5	1	deoxycorticosterone acetate	3	CYBA,MYH11,SPP1	1	Development of vasculature	100% (1/1)
1.155	5	1	PRLR	3	ESR1,FABP4,PIM1	1	Vasculogenesis	0% (0/1)
1.155	5	1	PRLR	3	CFD,ESR1,FABP4	1	Cellular infiltration	0% (0/1)
1.155	5	1	NEDD9	3	CD44,MMP9,SERPINE1	1	Migration of antigen presenting cells	0% (0/1)
1.155	5	1	ILF3	3	CXCL10,PLAU,PLAUR	1	Response of neutrophils	0% (0/1)
1.155	5	1	SPIB	3	BTK,CD86,IL18	1	Response of antigen presenting cells	0% (0/1)
1.155	5	1	diphtheria toxin	3	Ccl2,LGALS1,PENK	1	Chemotaxis of granulocytes	0% (0/1)
1.155	5	1	TLX1	3	CDC6,RAD51,SPI1	1	Growth of tumor	100% (1/1)
1.155	5	1	leucine	3	Ccl2,LEPR,SOD2	1	Quantity of lymphatic system cells	0% (0/1)
1.155	5	1	elovanoid N34	3	APOE,MMP12,MMP9	1	Cell movement of mononuclear leukocytes	0% (0/1)
1.155	5	1	DLX3	3	CDKN2A,MMP9,S100A9	1	Vasculogenesis	0% (0/1)
1.155	5	1	DLX3	3	CDKN2A,ELF3,S100A9	1	Immune response of cells	0% (0/1)
1.155	5	1	mir-223	3	C5AR1,CLEC4E,IL1RN	1	Recruitment of antigen presenting cells	0% (0/1)
1.155	5	1	Vegf	3	CHI3L1,MMP14,TIMP1	1	Proliferation of hepatic stellate cells	100% (1/1)
1.155	5	1	HIVEP1	3	IL18,IL1RN,MALT1	1	Cell movement of antigen presenting cells	0% (0/1)
1.155	5	1	bromocriptine	3	CCL2,IHH,SLC2A1	1	Leukopoiesis	0% (0/1)
1.155	5	1	FGFR3	3	CCL4,MMP9,SPP1	1	Activation of phagocytes	0% (0/1)
1.155	5	1	FGFR3	3	CCL4,MMP9,SPP1	1	Infiltration by neutrophils	0% (0/1)
1.155	5	1	FGFR3	3	CCL4,MMP9,SPP1	1	Activation of myeloid cells	0% (0/1)
1.155	5	1	FGFR3	3	CCL4,MMP9,SPP1	1	T cell migration	0% (0/1)
1.155	5	1	FGFR3	3	CCL4,MMP9,SPP1	1	Migration of lymphatic system cells	0% (0/1)
1.155	5	1	FGFR3	3	CCL4,MMP9,SPP1	1	Migration of phagocytes	0% (0/1)
1.155	5	1	FGFR3	3	CCL4,MMP9,SPP1	1	Cellular infiltration by granulocytes	0% (0/1)
1.155	5	1	FGFR3	3	CCL4,MMP9,SPP1	1	Migration of antigen presenting cells	0% (0/1)
1.155	5	1	FGFR3	3	CCL4,MMP9,SPP1	1	Transmigration of cells	0% (0/1)
1.155	5	1	FGFR3	3	CCL4,MMP9,SPP1	1	Migration of myeloid cells	0% (0/1)
1.155	5	1	FGFR3	3	CCL4,MMP9,SPP1	1	Cell movement of dendritic cells	0% (0/1)
1.155	5	1	FGFR3	3	CCL4,MMP9,SPP1	1	Recruitment of antigen presenting cells	0% (0/1)
1.155	5	1	IPMK	3	IL18,IL1RL1,IRF4	1	Metastatic solid tumor	0% (0/1)
1.155	5	1	CDK1	3	Ccl2,CXCL10,IL1RN	1	Activation of phagocytes	0% (0/1)
1.155	5	1	CDK1	3	Ccl2,CXCL10,TIMP1	1	Atherosclerosis	0% (0/1)
1.155	5	1	CDK1	3	Ccl2,CXCL10,IL1RN	1	Activation of myeloid cells	0% (0/1)
1.155	5	1	CDK1	3	Ccl2,CXCL10,IL1RN	1	Quantity of antigen presenting cells	0% (0/1)
1.155	5	1	CDK1	3	Ccl2,CXCL10,IL1RN	1	Cell movement of macrophages	0% (0/1)
1.155	5	1	CDK1	3	Ccl2,CXCL10,IL1RN	1	Recruitment of antigen presenting cells	0% (0/1)
1.155	5	1	PTH	3	IGF1,PLAU,SPP1	1	Proliferation of liver cells	0% (0/1)
1.155	5	1	elovanoid N32	3	APOE,MMP12,MMP9	1	Cell movement of mononuclear leukocytes	0% (0/1)
1.155	5	1	NTRK2	3	CCNE1,SPP1,THBS1	1	Proliferation of liver cells	0% (0/1)
1.155	5	1	ZBTB48	3	CDKN2A,GPNMB,SPP1	1	Metastatic solid tumor	0% (0/1)
1.155	5	1	CBX5	3	HBB,MMP7,OLR1	1	Lung injury	0% (0/1)
1.155	5	1	CX3CL1	3	IGF1,SPP1,TIMP1	1	Proliferation of liver cells	0% (0/1)
1.155	5	1	CX3CL1	3	FRZB,HMOX1,SPP1	1	Increased Levels of Hematocrit	0% (0/1)
1.155	5	1	2,2',4,4'-tetrabromodiphenyl ether	3	CD177,LCN2,MARCO	1	Engulfment of cells	0% (0/1)
1.155	5	1	losartan potassium	3	F3,SERPINE1,SPP1	1	Increased Levels of Hematocrit	0% (0/1)
1.155	14	1	bisindolylmaleimide I	12	AGT,BCL2A1,CD44,E2F3,HMOX1,IGF1,KCNJ11,MMP12,MMP7,MMP9,SERPINE1,SOD2	1	Genitourinary tumor	0% (0/1)
1.155	5	1	MLN120B	3	CD68,CTSB,CTSK	1	Amyloidosis	0% (0/1)
1.061	10	1	CREBBP	8	AGT,CD44,CD80,CXCL10,CYBB,MMP9,TLR2,TNFAIP8L2	1	Migration of antigen presenting cells	0% (0/1)
1	6	1	TAL1	4	C3,C3AR1,SPI1,TPSAB1/TPSB2	1	Cell movement of neutrophils	0% (0/1)
1	6	1	TAL1	4	C3,C3AR1,SPI1,TPSAB1/TPSB2	1	Chemotaxis of phagocytes	0% (0/1)
1	6	1	TAL1	4	C3,C3AR1,SPI1,TPSAB1/TPSB2	1	Chemotaxis of granulocytes	0% (0/1)
1	6	1	MITF	4	APOE,CD44,Mcpt4,SERPINE1	1	Damage of kidney	0% (0/1)
1	18	1	HTT	16	AGT,APOE,BCL3,CD74,CX3CL1,EGR2,GNAO1,KCNK2,MMP14,PENK,PLAUR,SERPINF1,SPP1,THBS2,TIAM1,TNFSF13	1	Cell movement of mononuclear leukocytes	0% (0/1)
1	6	1	ciprofloxacin	4	CSF2RB,LGMN,PSAP,SPP1	1	Hypersensitive reaction	0% (0/1)
1	6	1	ciprofloxacin	4	CD80,CD86,CSF2RB,SPP1	1	Migration of phagocytes	0% (0/1)
1	6	1	ciprofloxacin	4	CD80,CD86,CSF2RB,SPP1	1	Migration of antigen presenting cells	0% (0/1)
1	6	1	KRAS	4	Ccl2,CCL2,MMP9,TBX21	1	Experimental autoimmune myocarditis	0% (0/1)
1	6	1	STAT5B	4	APOE,CCL3L3,OSM,TLR2	1	Recruitment of antigen presenting cells	0% (0/1)
0.949	12	1	MMP1	10	CCNE1,CDKN2A,IGF1,MMP9,MYOCD,PLAU,PTGES,SERPINE1,TEK,TGFBR1	1	Malignant genitourinary solid tumor	100% (1/1)
0.894	7	1	E2F2	5	CCNE1,CDC6,CDKN2A,E2F3,SERPINE1	1	Vasculogenesis	100% (1/1)
0.816	8	1	EWSR1	6	CDK1,NUSAP1,PBK,PCLAF,RRM2,TOP2A	1	Lung tumor	0% (0/1)
0.816	8	1	EWSR1	6	CDK1,NUSAP1,PBK,PCLAF,RRM2,TOP2A	1	Intrathoracic organ tumor	0% (0/1)
0.816	8	1	TFEB	6	CD63,CTSB,CTSD,CTSK,NAGLU,PSAP	1	Amyloidosis	100% (1/1)
0.816	8	1	CD24	6	ATF3,CFTR,LAT2,PLAU,THBS1,TOP2A	1	Activation of cells	100% (1/1)
0.707	10	1	CCND1	8	CCNE1,CD44,CDKN2A,PGR,PLK1,RRM2,SPP1,TUBA1C	1	Metastatic solid tumor	100% (1/1)
0.707	4	1	MFSD2A	2	DHCR7,HK2	1	Development of head	100% (1/1)
0.577	5	1	SIGLEC8	3	BCL2A1,CD53,CLEC4A	1	Inflammation of gastrointestinal tract	100% (1/1)
0.577	14	1	CREB1	12	ARG1,ATF3,ESRRG,GPNMB,HMOX1,LCN2,PPARGC1A,SOD2,SRD5A1,SSTR1,TF,TGFBR1	1	Metastatic solid tumor	0% (0/1)
0.577	5	1	Stat3-Stat3	3	FGG,FTL,SOD2	1	Metastatic solid tumor	0% (0/1)
0.577	5	1	Stat3-Stat3	3	FGG,FTL,SOD2	1	Advanced malignant solid tumor	0% (0/1)
0.577	5	1	Stat3-Stat3	3	A2M,FTL,SOD2	1	Ion homeostasis of cells	0% (0/1)
0.577	5	1	RAD21	3	FOXP3,HLA-DQA1,THBS1	1	Inflammation of lung	0% (0/1)
0.577	5	1	diethylstilbestrol	3	F3,FRZB,STEAP3	1	Increased Levels of Hematocrit	0% (0/1)
0.577	5	1	4-tert-octylphenol	3	EMP1,ESR1,PGR	1	Metastasis	0% (0/1)
0.577	5	1	NPM1	3	CXCL3,F3,HMOX1	1	Response of myeloid leukocytes	0% (0/1)
0.577	5	1	IL2	3	Ly6a (includes others),OSM,RRM2	1	Growth of hepatocellular carcinoma	0% (0/1)
0.577	5	1	ERBB2	3	CENPA,NCAPG,RRM2	1	Growth of hepatocellular carcinoma	0% (0/1)
0.5	6	1	tributyrin	4	ATF3,CCL2,OLR1,SOD2	1	Amyloidosis	0% (0/1)
0.5	6	1	TGFB2	4	HMOX1,SERPINE1,SPP1,THBS1	1	Damage of kidney	0% (0/1)
0.5	6	1	RASSF1	4	CAV1,EMP1,ESR1,SPP1	1	Metastatic solid tumor	100% (1/1)
0.447	7	1	4-nitroquinoline-1-oxide	5	CCNA2,CCNB1,CCNE1,CDK1,MMP9	1	Cancer of cells	100% (1/1)
0.447	7	1	4-nitroquinoline-1-oxide	5	CCNA2,CCNB1,CCNE1,CDK1,MMP9	1	Lung tumor	0% (0/1)
0.447	7	1	4-nitroquinoline-1-oxide	5	CCNA2,CCNB1,CCNE1,CDK1,MMP9	1	Intrathoracic organ tumor	0% (0/1)
0.447	7	1	PBRM1	5	CCNB1,CDK1,CXCL10,FOXP3,PLK1	1	Cancer of cells	100% (1/1)
0.447	7	1	FDI6	5	CCNA2,CCNB1,CDK1,PLK1,RAD51	1	Cancer of cells	0% (0/1)
0.438	49	1	CD40LG	47	ATF3,BATF,BCL2A1,CCL17,CCL2,CCL22,CCL3L3,CCL4,CD44,CD63,CD80,CD83,CD86,CSF2RA,CXCL10,CXCL2,DUSP4,F3,FCER2,FCGR2B,FOSB,GCH1,GPR183,HK2,HLA-DQA1,HLA-DQB1,IL12B,IL12RB1,IL24,INHBA,IRF4,ITGAM,ITGB2,LAMP3,MMP14,NFKBIE,PIM1,PLAU,PLAUR,RGS1,SERPINA10,SERPINE1,SOD2,TNFAIP2,TNFRSF11A,TNFSF8,UBD	1	Tumorigenesis of tissue	100% (1/1)
0.438	49	1	CD40LG	47	ATF3,BATF,BCL2A1,CCL17,CCL2,CCL22,CCL3L3,CCL4,CD44,CD63,CD80,CD83,CD86,CSF2RA,CXCL10,CXCL2,DUSP4,F3,FCER2,FCGR2B,FOSB,GCH1,GPR183,HK2,HLA-DQA1,HLA-DQB1,IL12B,IL12RB1,IL24,INHBA,IRF4,ITGAM,ITGB2,LAMP3,MMP14,NFKBIE,PIM1,PLAU,PLAUR,RGS1,SERPINA10,SERPINE1,SOD2,TNFAIP2,TNFRSF11A,TNFSF8,UBD	1	Epithelial neoplasm	100% (1/1)
0.417	25	1	Eldr	23	ANLN,CCNA2,CCNB1,CDK1,CENPA,CEP55,CLSPN,ESPL1,HJURP,IQGAP3,KIF14,KIF18B,KIF2C,KIF4A,MYBL2,NCAPG,PLK1,SPAG5,SPC25,TICRR,TOP2A,TTK,UBE2C	1	Malignant genitourinary solid tumor	0% (0/1)
0.408	8	1	DRD2	6	CCL2,CXCL2,FOSB,IGF1,SERPINE1,THBS1	1	Atherosclerosis	0% (0/1)
0.354	10	1	ELAVL1	8	CD83,CTSS,FCGR2A,HBB,HLA-DRB5,PLA2G7,PSAP,TLR2	1	Hypersensitive reaction	0% (0/1)
0.302	13	1	IL22	11	C3,CCL3L3,CCL4,CXCL10,HMOX1,HP,IL12B,LCN2,MMP9,S100A9,SOD2	1	Amyloidosis	0% (0/1)
0.289	14	1	CKAP2L	12	CCNB1,CDK1,CENPH,ESPL1,KIF2C,NCAPG,NDC80,NUF2,PLK1,SPC25,TUBB4A,UBE2C	1	Cancer of cells	100% (1/1)
0.277	15	1	levodopa	13	AIF1,C4A/C4B,CAPG,CD63,CHRNA4,CTSB,CTSZ,GAS7,KCNC4,NAGLU,PENK,PSAP,SLC2A1	1	Amyloidosis	100% (1/1)
0.267	16	1	ASPSCR1-TFE3	14	APOE,ATP6V1B2,CTSA,CTSD,GPNMB,GRN,HMOX1,IFI30,MREG,NPC2,PPARGC1A,RAB32,SOD2,STOM	1	Genitourinary tumor	100% (1/1)
0.218	23	1	l-asparaginase	21	BARD1,BUB1B,CCNA2,CDC6,CDK1,CENPH,CLSPN,DHCR7,KIF20B,KIF2C,KNTC1,MCM5,NCAPG,NDC80,NUF2,PLK1,RAD51,RMI2,SPC25,TOP2A,UBE2C	1	Cancer of cells	100% (1/1)
0	10	1	ATP	8	ARG1,CCL4,CD14,CXCL10,F3,IL12B,LCN2,SERPINE1	1	Amyloidosis	0% (0/1)
0	12	1	DSCAM	10	GSN,MAPT,NRCAM,NTRK2,ROBO2,SHANK2,SRGAP3,TUBB3,TUBB4A,WNT7B	1	Respiratory system tumor	100% (1/1)
0	15	1	DSCAM	13	GADD45G,GSN,MAPT,MICALL2,NRCAM,NTF3,NTRK2,ROBO2,SHANK2,SNCAIP,SRGAP3,TUBB3,TUBB4A	1	Cancer of cells	100% (1/1)
0	7	1	RABL6	5	HMOX1,NCAPG,PBK,PLK1,TOP2A	1	Metastatic solid tumor	0% (0/1)
0	6	1	EP4-D	4	CD74,CTH,CTSZ,IL12B	1	Amyloidosis	0% (0/1)
0	5	1	olaparib	3	CCNB1,CDK1,CXCL10	1	Amyloidosis	0% (0/1)
0	7	1	olaparib	5	CCNA2,CCNB1,CDK1,CXCL10,RAD51	1	Cancer of cells	100% (1/1)
0	9	1	E2F3	7	CCNB1,CDK1,CDKN2A,IGF1,IGF2,SERPINE1,TP73	1	Amyloidosis	0% (0/1)
0	10	1	E2F3	8	CCNE1,CDKN2A,IGF2,PLK1,RRM2,SERPINE1,THBS1,TP73	1	Metastatic solid tumor	100% (1/1)
0	11	1	E2F3	9	CCNE1,CDKN2A,IGF2,MYBL2,PLK1,RRM2,SERPINE1,THBS1,TP73	1	Advanced malignant solid tumor	100% (1/1)
0	5	1	H2AZ1	3	MYBL2,PLK1,TOP2A	1	Advanced malignant solid tumor	0% (0/1)
0	7	1	H2AZ1	5	E2F8,FABP4,MYBL2,PLK1,TOP2A	1	Invasive tumor	0% (0/1)
0	10	1	H2AZ1	8	CEP55,CKAP2L,E2F8,FABP4,MYBL2,PLK1,SPC25,TOP2A	1	Lung tumor	0% (0/1)
0	10	1	H2AZ1	8	CEP55,CKAP2L,E2F8,FABP4,MYBL2,PLK1,SPC25,TOP2A	1	Intrathoracic organ tumor	0% (0/1)
0	12	1	Tcf7	10	CCL3L3,CCL4,CDK1,GM2A,HLA-DQA1,LYZ,MMP9,PENK,PSAP,SOAT1	1	Amyloidosis	0% (0/1)
0	8	1	E2f	6	CAV1,CCNB1,CDK1,CDKN2A,IGF1,SERPINE1	1	Amyloidosis	0% (0/1)
0	5	1	DYRK1A	3	CCNB1,CDK1,SERPINE1	1	Amyloidosis	100% (1/1)
0	9	1	DYRK1A	7	CCNB1,CDC6,CDK1,E2F8,KNTC1,SERPINE1,UBE2C	1	Cancer of cells	100% (1/1)
0	5	1	FGFR2	3	IGF1,PLAUR,SPP1	1	Damage of kidney	0% (0/1)
0	7	1	FGFR2	5	DLL1,IGF1,IGF2,SOX2,SPP1	1	Amyloidosis	100% (1/1)
0	5	1	GnRH-A	3	CD68,FOSB,SERPINE1	1	Atherosclerosis	0% (0/1)
0	5	1	EBI3	3	GADD45G,HLA-DQA1,HLA-DRA	1	Hypersensitive reaction	0% (0/1)
0	6	1	NDUFA13	4	A2M,CCNB1,CDK1,MMP9	1	Amyloidosis	0% (0/1)
0	6	1	MYBL2	4	CDKN2A,PLK1,RRM2,TOP2A	1	Metastatic solid tumor	0% (0/1)
-1.25	18	1	IL4	16	ADORA2B,CCL17,Ccl2,CCL2,CCL3L3,CCL4,CD44,CSTB,CYSLTR1,F3,ITGB2,LILRB4,RIPK3,S100A9,THY1,TLR2	1	Extravasation	0% (0/1)
-1.571	51	1	RB1	49	ACTC1,ACTN2,ASF1B,ATF3,BARD1,CCNA2,CCNB1,CCNE1,CD44,CD83,CDC6,CDK1,CDKN2A,CPA4,CXCL2,CXCL3,CYSLTR1,DLK1,DMPK,E2F3,EHD3,F3,FABP4,FAM111A,FOSB,GEM,GPR176,IGF1,KRT5,MCM10,MCM5,MELK,MYBL2,MYH4,MYOM2,OLR1,OSMR,PCLAF,PIM1,PLK1,PPARGC1A,RAD51,RRM2,SCTR,SERPINE1,SOD2,TNNT1,TP73,UBE2C	1	Malignant genitourinary solid tumor	100% (1/1)
-1.753	57	1	tetrachlorodibenzodioxin	55	ACER2,AIF1,ALDH3A1,BCAT1,BLNK,CACNA1D,CAP2,CCNA2,CCNE1,CD86,CDKN2A,CFTR,CTSD,E2F8,EREG,ESR1,ESRRG,F3,FMO3,GRN,HDAC9,HMOX1,IDH1,IGF2,ITGAX,KRT14,MAFB,MARCO,MGP,MMP14,MYH11,NCF4,PCLAF,PF4,PGR,PLAGL1,PLAUR,PPP1R32,PTGFR,RESP18,S100A8,S100A9,SERPINE1,SFN,SLC2A1,SLC7A5,SOD2,SOX2,SPP1,THBS1,TK1,TNFRSF19,TNNT1,TP73,UGT1A6	1	Malignant genitourinary solid tumor	100% (1/1)
-2.457	30	1	8-bromo-cAMP	28	ARG1,CAMK2A,CAV1,CCNB1,CD68,CDK1,CFD,CTSB,CTSD,CTSK,ESR1,GM2A,GSN,IGF1,IGF2,IL12RB1,LGMN,LIPA,MAPK10,MMP9,NAGLU,NTRK1,PGR,SERPINE1,SLC2A1,SPP1,TGFBR3,TIMP1	1	Amyloidosis	0% (0/1)
-2.502	29	1	FSH	27	ACP5,AKAP12,CAP2,DHCR7,DUSP9,EREG,GEM,HK2,IGFBP3,IL1RN,INHBA,LGALS1,LRRC32,MAPT,MMP9,PENK,PGR,PTGER2,SERPINE1,SLC2A1,SMAD6,TF,TGFBR1,TGFBR3,THBS1,TIMP1,TK1	1	Cancer of cells	0% (0/1)
-2.556	32	1	NFKBIA	30	A2M,C3,CCL2,CCL3L3,CCNB1,CD74,CHI3L1,CTSB,CTSZ,CXCL10,F3,GM2A,GRN,HLA-DQA1,HMOX1,IGF2,KCNH2,LCN2,LYZ,MMP9,NAGLU,OGN,PLAU,PLD3,S100A9,SERPINE2,SOAT1,SOD2,TIMP1,TLR2	1	Amyloidosis	0% (0/1)
-2.6	31	1	forskolin	29	ATF3,CCL2,CCNB1,CD14,CD68,CDKN2A,CNN1,CXCL10,DHCR7,ESR1,FRRS1,GRN,HLA-DQA1,HLA-DQB1,HMOX1,HP,IGF1,IGF2,IGFBP3,MMP9,NTRK2,PENK,PGR,PLAU,SERPINE1,SLC2A1,SOD2,SPP1,TIMP1	1	Amyloidosis	0% (0/1)
-2.696	95	1	MAPT	93	A2M,ACTA1,ACTG1,ADD2,AIF1,APOBEC1,ARL11,ATF3,ATP1A2,ATP1A3,BCL3,C1QB,C1S,C3,C3AR1,C4A/C4B,CAMK2A,CAPG,Ccl2,CCL2,CCL3L3,CCL4,CCNB1,CD14,CD44,CD63,CD74,CD84,CFAP126,CST7,CTSD,CTSS,CTSZ,CXCL10,CXCL13,CXCL2,CYBB,DNAAF3,DSCAML1,ENO2,FCGR2B,FRRS1,GALNT15,GAS7,GEM,GNAO1,GNAZ,GPNMB,HLA-DQA1,HLA-DQB1,HLA-DRB5,HMOX1,IFI16,IL1RN,ITGAM,ITGAX,ITGB2,LCN2,LY86,LYZ,MAP1B,MCM10,MMP9,MYO5A,NMNAT2,NTRK2,OSMR,PCLO,P…	1	Extracranial solid tumor	100% (1/1)
-2.903	95	1	MAPT	93	A2M,ACTA1,ACTG1,ADD2,AIF1,APOBEC1,ARL11,ATF3,ATP1A2,ATP1A3,BCL3,C1QB,C1S,C3,C3AR1,C4A/C4B,CAMK2A,CAPG,Ccl2,CCL2,CCL3L3,CCL4,CCNB1,CD14,CD44,CD63,CD74,CD84,CFAP126,CST7,CTSD,CTSS,CTSZ,CXCL10,CXCL13,CXCL2,CYBB,DNAAF3,DSCAML1,ENO2,FCGR2B,FRRS1,GALNT15,GAS7,GEM,GNAO1,GNAZ,GPNMB,HLA-DQA1,HLA-DQB1,HLA-DRB5,HMOX1,IFI16,IL1RN,ITGAM,ITGAX,ITGB2,LCN2,LY86,LYZ,MAP1B,MCM10,MMP9,MYO5A,NMNAT2,NTRK2,OSMR,PCLO,P…	1	Non-melanoma solid tumor	100% (1/1)
-3.062	26	1	HGF	24	A2M,ATF3,CAV1,CCL2,CCL4,CDK1,CDKN2A,CTSK,F3,HMOX1,IGF1,IGFBP3,IL12B,LCN2,LGMN,MMP9,OSMR,PLAU,S100A9,SERPINE1,SOD2,SOX2,SPP1,TIMP1	1	Amyloidosis	0% (0/1)
-3.457	63	1	TNF	61	A2M,AGT,APOE,ARG1,ATF3,C3,C4A/C4B,CAV1,CCL2,CCL3L3,CCL4,CD14,CD74,CDKN2A,CFD,CHI3L1,CNN1,CST7,CTSB,CTSK,CTSS,CTSZ,CXCL10,CYBB,ESR1,F3,FCGR2B,GM2A,GRN,HMOX1,HP,IGF1,IGF2,IGFBP3,IL12B,IL12RB1,ITGAX,KCNH2,LCN2,LGALS3,MMP9,NAGLU,OGN,OLR1,OSMR,PENK,PLA2G2A,PLAU,PLD3,S100A9,SERPINE1,SERPINE2,SLC2A1,SOAT1,SOD2,SOX2,SPP1,TF,THY1,TIMP1,TLR2	1	Amyloidosis	100% (1/1)
-3.638	19	1	NOTCH1	17	CD14,CD68,CFD,CNN1,DLL1,FCGR2A,FCGR2B,GRN,HMOX1,IGFBP3,IL12B,MYH11,SERPINE1,SLC2A1,SOX2,SPP1,TGFBR3	1	Amyloidosis	100% (1/1)
-4.041	14	1	E2F1	12	CAV1,CCNB1,CDK1,CDKN2A,CTSB,GM2A,IGF1,IGF2,MMP9,SERPINE1,SOD2,TP73	1	Amyloidosis	0% (0/1)
-4.16	15	1	17-alpha-ethinylestradiol	13	APOE,C3,CCL3L3,CD68,CD74,CDK1,CTSS,CXCL10,F3,IGF1,LCN2,MMP9,PGR	1	Amyloidosis	0% (0/1)
-4.252	95	1	MAPT	93	A2M,ACTA1,ACTG1,ADD2,AIF1,APOBEC1,ARL11,ATF3,ATP1A2,ATP1A3,BCL3,C1QB,C1S,C3,C3AR1,C4A/C4B,CAMK2A,CAPG,Ccl2,CCL2,CCL3L3,CCL4,CCNB1,CD14,CD44,CD63,CD74,CD84,CFAP126,CST7,CTSD,CTSS,CTSZ,CXCL10,CXCL13,CXCL2,CYBB,DNAAF3,DSCAML1,ENO2,FCGR2B,FRRS1,GALNT15,GAS7,GEM,GNAO1,GNAZ,GPNMB,HLA-DQA1,HLA-DQB1,HLA-DRB5,HMOX1,IFI16,IL1RN,ITGAM,ITGAX,ITGB2,LCN2,LY86,LYZ,MAP1B,MCM10,MMP9,MYO5A,NMNAT2,NTRK2,OSMR,PCLO,P…	1	Solid tumor	100% (1/1)
-4.427	12	1	LIN9	10	BUB1B,CCNA2,CCNB1,CDC6,CDK1,CDKN2A,CEP55,MYBL2,PLK1,UBE2C	1	Malignant genitourinary solid tumor	100% (1/1)
-4.491	8	1	let-7	6	BUB1B,CD44,HMOX1,IGF1,TGFBR1,THBS1	1	Accumulation of cells	0% (0/1)
-4.536	9	1	SIM1	7	CD86,DLL1,FCGR2A,IFI16,TNFRSF9,Tnfsf9,TYROBP	1	Hematopoiesis of mononuclear leukocytes	0% (0/1)
-4.596	10	1	ARNT2	8	APOE,CD86,CYBA,DLL1,FCGR2A,SLC2A1,TNFRSF9,WNT7B	1	Advanced malignant tumor	0% (0/1)
-5.307	8	1	TPH1	6	GNPDA1,IFI16,LGMN,MAPT,PLA2G7,SUSD3	1	Cell-cell contact	0% (0/1)
-5.307	8	1	ZFP91	6	BCAT1,CCNA2,CDK1,HK2,MAD2L1,RRM2	1	Respiratory system tumor	0% (0/1)
-6	6	1	Rb	4	CCL2,CCNA2,MYBL2,SOD2	1	Stimulation of cells	0% (0/1)
-6.124	8	1	elaidic acid	6	APOE,DHCR7,HPX,LCN2,LIPA,SOAT1	1	Amyloidosis	0% (0/1)
-6.261	7	1	KCNIP3	5	ADORA2B,CX3CL1,FCGR2B,FOSB,GPX1	1	Atherosclerosis	0% (0/1)
-6.708	7	1	MYOCD	5	CCL1,CNN1,GJA1,MYH11,PTPRB	1	Development of vasculature	100% (1/1)
-6.708	7	1	thiostrepton	5	CDKN2A,KIF2C,MCM10,MELK,NCAPG	1	Lung tumor	0% (0/1)
-6.708	7	1	thiostrepton	5	CDKN2A,KIF2C,MCM10,MELK,NCAPG	1	Intrathoracic organ tumor	0% (0/1)
-6.708	7	1	Rhox5	5	GDAP1,PPARGC1A,PTPRU,TMEM176A,TMEM176B	1	Lung tumor	0% (0/1)
-6.708	7	1	Rhox5	5	GDAP1,PPARGC1A,PTPRU,TMEM176A,TMEM176B	1	Intrathoracic organ tumor	0% (0/1)
-6.708	7	1	Yaf2	5	ACTC1,DNAH12,GFRA1,TBXT,TIMP4	1	Cancer of cells	0% (0/1)
-7.506	5	1	deferasirox	3	ITGAM,ITGB2,RGS1	1	Adhesion of immune cells	0% (0/1)
-7.506	5	1	deferasirox	3	CD300A,ITGAM,ITGB2	1	Activation of myeloid cells	0% (0/1)
-7.506	5	1	deferasirox	3	ITGAM,ITGB2,RGS1	1	Adhesion of blood cells	0% (0/1)
-7.506	5	1	deferasirox	3	CD300A,ITGAM,ITGB2	1	Migration of phagocytes	0% (0/1)
-7.506	5	1	deferasirox	3	CD300A,ITGAM,ITGB2	1	Degranulation of phagocytes	0% (0/1)
-7.506	5	1	deferasirox	3	CD300A,ITGAM,ITGB2	1	Transmigration of blood cells	0% (0/1)
-7.506	5	1	deferasirox	3	CD300A,ITGAM,ITGB2	1	Migration of myeloid cells	0% (0/1)
-7.506	5	1	deferasirox	3	CD300A,ITGAM,ITGB2	1	Degranulation of myeloid cells	0% (0/1)
-7.506	5	1	COTI-2	3	CCNB1,CDK1,GJA1	1	Proliferation of muscle cells	0% (0/1)
-7.766	15	1	TBX2	13	ANLN,ASF1B,ATF3,CCNA2,CCNB1,CDC6,CDCA3,CDK1,CDKN2A,E2F8,MCM5,PLK1,PRC1	1	Neoplasia of cells	100% (1/1)
-9.192	4	1	HCAR2	2	IL12B,PLK1	1	Growth of tumor	100% (1/1)

## Sheet: S6c Year 2
Table S6. All significant regulator effects at each time point
Table S6c. All significant regulator effects at Year 2
Consistency Score	Node Total	Regulator Total	Regulators	Target Total	Target Molecules in Dataset	Disease & Function Total	Diseases & Functions	Known Regulator-Disease/Function Relationships
3.578	22	1	MYD88	20	C3,Ccl2,CCL2,CCL3L3,CCL5,CXCL2,CXCL3,CXCL6,HCK,HP,IL18,INHBA,MARCO,MMP7,PTGES,S100A8,SERPINE1,SPP1,TGFB1,TLR2	1	Chemotaxis of phagocytes	100% (1/1)
3.536	20	1	salmonella minnesota R595 lipopolysaccharides	18	Ccl2,CCL2,CCL22,CCL3L3,CCL5,CD80,CD83,CD86,CXCL2,CXCL3,CXCL6,HLA-DQA1,HLA-DRA,MET,SERPINE1,SLC7A2,TLR2,Tnfsf9	1	Activation of cells	100% (1/1)
3.5	18	1	peptidoglycan	16	Ccl2,CCL2,CCL3L3,CCL5,CCR5,CD80,CD86,CXCL2,CXCL3,IL18,ITGB2,S100A8,S100A9,TLR2,TLR5,TLR7	1	Adhesion of blood cells	0% (0/1)
3.5	18	1	peptidoglycan	16	Ccl2,CCL2,CCL3L3,CCL5,CCR5,CD80,CD86,CXCL2,CXCL3,IL18,ITGB2,S100A8,S100A9,TLR2,TLR5,TLR7	1	Adhesion of immune cells	0% (0/1)
3.5	18	1	peptidoglycan	16	Ccl2,CCL2,CCL3L3,CCL5,CCR5,CD80,CD86,CXCL2,CXCL3,IL18,ITGB2,S100A8,S100A9,TLR2,TLR5,TLR7	1	Binding of blood cells	0% (0/1)
3.5	18	1	peptidoglycan	16	Ccl2,CCL2,CCL3L3,CCL5,CCR5,CD80,CD86,CXCL2,CXCL3,IL18,ITGB2,S100A8,S100A9,TLR2,TLR5,TLR7	1	Binding of leukocytes	0% (0/1)
3.5	18	1	FN1	16	APOE,CCL2,CCL5,CDKN1A,CXCL2,CXCL3,ITGAV,MMP14,MMP9,PLAU,PLAUR,SERPINE1,SPP1,TGFB1,THBS1,TLR2	1	Chemotaxis	100% (1/1)
3.464	14	1	N-acetylmuramyl-L-alanyl-D-isoglutamine	12	Ccl2,CCL2,CCL5,CD80,CD86,CXCL3,CXCL6,ITGAV,ITGB2,MMP9,MSR1,TREM1	1	Activation of myeloid cells	100% (1/1)
3.464	14	1	peptidoglycan	12	CCL2,CCL5,CCR5,CD80,CD86,CXCL2,CXCL3,ITGB2,S100A8,S100A9,TLR2,TLR5	1	Interaction of phagocytes	0% (0/1)
3.395	19	1	Tnf (family)	17	C3AR1,CCL1,Ccl2,CCL2,CCL5,CCR1,CCR5,CD4,CD72,CSF1,CX3CL1,CXCL3,IL33,INHBA,LCN2,SERPINE1,TLR2	1	Chemotaxis of phagocytes	0% (0/1)
3.357	17	1	salmonella minnesota R595 lipopolysaccharides	15	Ccl2,CCL2,CCL22,CCL5,CD80,CD83,CD86,CXCL3,CXCL6,HLA-DQA1,HLA-DRA,MET,SLC7A2,TLR2,Tnfsf9	1	Activation of blood cells	100% (1/1)
3.357	17	1	salmonella minnesota R595 lipopolysaccharides	15	Ccl2,CCL2,CCL22,CCL5,CD80,CD83,CD86,CXCL3,CXCL6,HLA-DQA1,HLA-DRA,MET,SLC7A2,TLR2,Tnfsf9	1	Activation of leukocytes	100% (1/1)
3.357	17	1	peptidoglycan	15	Ccl2,CCL2,CCL3L3,CCL5,CCR5,CCR8,CXCL2,CXCL3,CXCL6,IL18,ITGB2,S100A8,S100A9,TLR2,TLR9	1	Homing of cells	100% (1/1)
3.328	15	1	E. coli lipopolysaccharide	13	Ccl2,CCL2,CCL5,CXCL2,CXCL3,CXCL6,IL18,MMP9,S100A8,S100A9,TGFB1,TREM1,TREM3	1	Cell movement of neutrophils	0% (0/1)
3.328	15	1	E. coli lipopolysaccharide	13	Ccl2,CCL2,CCL22,CCL5,CXCL2,CXCL3,CXCL6,IL18,S100A8,S100A9,TGFB1,TREM1,TREM3	1	Chemotaxis of phagocytes	0% (0/1)
3.328	15	1	lipid A	13	ABCA1,C3,Ccl2,CCL2,CD14,CD86,CXCL3,FCGR1A,FCGR2B,MARCO,MSR1,SYK,THBS1	1	Immune response of cells	0% (0/1)
3.328	15	1	F2	13	Ccl2,CCL2,CD44,COL1A1,CX3CL1,CXCL3,CYBB,F3,FN1,HMOX1,MMP9,PLAUR,SERPINE1	1	Migration of myeloid cells	0% (0/1)
3.317	13	1	hemozoin	11	Ccl2,CCL2,CCL3L3,CCR1,CCR5,CXCL2,CXCL3,HMOX1,MMP9,S100A8,S100A9	1	Cell movement of myeloid cells	0% (0/1)
3.317	13	1	salmonella minnesota R595 lipopolysaccharides	11	Ccl2,CCL2,CCL22,CCL3L3,CCL5,Ccl7,CXCL2,CXCL3,CXCL6,SERPINE1,TLR2	1	Chemotaxis of myeloid cells	0% (0/1)
3.317	13	1	immethridine	11	BTK,C3,C5AR1,Ccl2,CD14,CD44,CTSS,CXCL3,FCGR1A,LCN2,SIGLEC1	1	Immune response of cells	0% (0/1)
3.317	13	1	Go 6976	11	ABCA1,Ccl2,CCL5,CXCL2,CXCL3,CXCL6,CYBB,FN1,HMOX1,MMP9,TNFRSF9	1	Migration of phagocytes	0% (0/1)
3.25	18	1	lipoteichoic acid	16	Ccl2,CCL2,CCR5,CD14,CD80,CD83,CD86,CYBB,HMOX1,IL1RN,MMP9,NR4A1,TLR2,TLR6,TLR7,TREM1	1	Activation of blood cells	100% (1/1)
3.207	16	1	Go 6976	14	ABCA1,Ccl2,CCL5,CDKN1A,CHGA,CXCL2,CXCL3,CXCL6,CYBB,FN1,HMOX1,MMP9,PLD1,SOD2	1	Advanced malignant tumor	0% (0/1)
3.207	16	1	cytokine	14	C5AR1,CCL2,CCL22,CCL5,CSF1,CX3CL1,CXCL3,HMOX1,IL24,MMP12,MMP9,PLAU,SERPINE1,TLR2	1	Cell movement of macrophages	0% (0/1)
3.207	16	1	Go 6976	14	ABCA1,Ccl2,CCL5,CDKN1A,CHGA,CXCL2,CXCL3,CXCL6,CYBB,FN1,HMOX1,MMP9,PLD1,SOD2	1	Metastasis	0% (0/1)
3.207	16	1	ERK	14	Ccl2,CCL2,CCR1,COL1A1,CXCL2,CXCL6,FN1,HMOX1,ITGAV,ITGB2,MMP14,MMP9,PLAU,SERPINE1	1	Migration of myeloid cells	0% (0/1)
3.175	14	1	hemozoin	12	Ccl2,CCL2,CCL3L3,CCR1,CCR5,CD80,CXCL2,CXCL3,HMOX1,MMP9,S100A8,S100A9	1	Cell movement of phagocytes	100% (1/1)
3.175	14	1	Fcer1	12	CCL1,Ccl2,CCL2,CCL3L3,CCL5,Ccl7,Ccl9,CD4,CSF1,CXCL3,IL33,INHBA	1	Chemotaxis	100% (1/1)
3.175	14	1	N-acetylmuramyl-L-alanyl-D-isoglutamine	12	Ccl2,CCL2,CCL5,Ccl7,CXCL2,CXCL3,CXCL6,ITGAV,ITGB2,MMP9,MSR1,TREM1	1	Inflammatory response	100% (1/1)
3.162	12	1	peptidoglycan	10	CCL2,CCL5,CXCL2,CXCL3,IL18,ITGB2,S100A8,S100A9,TLR2,TLR5	1	Binding of myeloid cells	0% (0/1)
3.162	12	1	uric acid	10	Ccl2,CCL2,CCL3L3,CCL5,CXCL2,CXCL3,IL18,ITGAV,TGFB1,TREM1	1	Chemotaxis	100% (1/1)
3.153	19	1	RETNLB	17	CCL2,CCL3L3,CCL5,Ccl9,CCN4,CCR1,FABP4,FN1,FRZB,HEY1,IGF1,MYC,NR4A1,Retnla,TGFB1,TIMP1,TLR2	1	Differentiation of connective tissue cells	0% (0/1)
3.098	17	1	Go 6976	15	ABCA1,BMP6,Ccl2,CCL5,CDKN1A,CHGA,CXCL2,CXCL3,CXCL6,CYBB,FN1,HMOX1,MMP9,PLD1,SOD2	1	Advanced stage tumor	0% (0/1)
3.098	17	1	Go 6976	15	ABCA1,Ccl2,CCL5,CD83,CDKN1A,CHGA,CXCL2,CXCL3,CXCL6,CYBB,FN1,HMOX1,MMP9,PLD1,SOD2	1	Invasive tumor	0% (0/1)
3.064	20	1	INSIG1	18	APOE,CCL22,CCL5,CCR5,CXCL2,Cxcl3,CXCL3,CXCL6,LCN2,MARCO,PLA2G7,PLD1,PPARG,PTGES,S100A8,S100A9,SELPLG,TGFB1	1	Homing of cells	0% (0/1)
3.051	15	1	N-acetylmuramyl-L-alanyl-D-isoglutamine	13	CARD9,Ccl2,CCL2,CCL5,CD80,CD86,CXCL3,CXCL6,ITGAV,ITGB2,MMP9,MSR1,TREM1	1	Activation of phagocytes	100% (1/1)
3.051	15	1	TICAM1	13	Ccl2,CCL2,CCL3L3,CCL5,CFB,CXCL2,CXCL3,CXCL6,IL18,MET,SERPINE1,TLR2,TREM1	1	Cell movement of neutrophils	0% (0/1)
3.051	15	1	palmitic acid	13	Ccl2,CCL2,CCL3L3,CCL5,CDKN1A,CXCL2,CXCL3,CYBB,INHBA,LCN2,SERPINE1,TGFB1,TLR2	1	Chemotaxis of phagocytes	0% (0/1)
3.024	9	1	CCL5	7	C5AR1,Ccl2,CCL2,CD44,CXCL3,MMP9,THBS1	1	Activation of myeloid cells	100% (1/1)
3.024	9	1	CCL5	7	C5AR1,Ccl2,CCL2,CD44,CXCL3,MMP9,THBS1	1	Activation of phagocytes	100% (1/1)
3.024	9	1	CLEC4E	7	AREG,Ccl2,CCL3L3,CLEC5A,CSF1,CXCL2,CXCL3	1	Cellular infiltration	100% (1/1)
3.024	9	1	CLEC4E	7	AREG,Ccl2,CCL3L3,CLEC5A,CSF1,CXCL2,CXCL3	1	Cellular infiltration by blood cells	100% (1/1)
3.015	13	1	ERK	11	Ccl2,CCL2,FN1,HMOX1,ITGAV,ITGB2,LCN2,MMP9,PDK4,PTGES,THBS1	1	Activation of macrophages	0% (0/1)
3.015	13	1	Fcer1	11	CCL1,Ccl2,CCL2,CCL3L3,CCL5,Ccl9,CSF1,CXCL3,IL1RN,IL33,TNFRSF9	1	Cell movement of antigen presenting cells	0% (0/1)
3.015	13	1	Fcer1	11	CCL1,Ccl2,CCL2,CCL3L3,CCL5,Ccl7,CD4,CSF1,CXCL3,IL33,INHBA	1	Chemotaxis of leukocytes	0% (0/1)
3.015	13	1	Fcer1	11	CCL1,Ccl2,CCL2,CCL3L3,CCL5,Ccl7,CD4,CSF1,CXCL3,IL33,INHBA	1	Homing of blood cells	0% (0/1)
3.015	13	1	Fcer1	11	CCL1,Ccl2,CCL2,CCL3L3,CCL5,Ccl7,CD4,CSF1,CXCL3,IL33,INHBA	1	Homing of leukocytes	0% (0/1)
3.015	13	1	F2	11	Ccl2,CCL2,Ccl9,CD44,COL1A1,CX3CL1,CXCL3,FN1,MMP9,OSM,THBS1	1	Lymphocyte migration	100% (1/1)
3.015	13	1	F2	11	Ccl2,CCL2,Ccl9,CD44,COL1A1,CX3CL1,CXCL3,FN1,MMP9,OSM,THBS1	1	Migration of lymphatic system cells	100% (1/1)
3.015	13	1	salmonella minnesota R595 lipopolysaccharides	11	Ccl2,CCL2,CCL22,CCL3L3,CCL5,Ccl7,CXCL2,CXCL3,CXCL6,SERPINE1,TLR2	1	Recruitment of cells	0% (0/1)
3.015	13	1	salmonella minnesota R595 lipopolysaccharides	11	Ccl2,CCL2,CCL22,CCL3L3,CCL5,Ccl7,CXCL2,CXCL3,CXCL6,SERPINE1,TLR2	1	Recruitment of leukocytes	0% (0/1)
3.015	13	1	salmonella minnesota R595 lipopolysaccharides	11	Ccl2,CCL2,CCL22,CCL3L3,CCL5,Ccl7,CXCL2,CXCL3,CXCL6,SERPINE1,TLR2	1	Recruitment of myeloid cells	0% (0/1)
3.015	13	1	salmonella minnesota R595 lipopolysaccharides	11	Ccl2,CCL2,CCL22,CCL3L3,CCL5,Ccl7,CXCL2,CXCL3,CXCL6,SERPINE1,TLR2	1	Recruitment of phagocytes	0% (0/1)
3	11	1	CISH	9	CCL3L3,CD14,CSF1,CXCL3,MYC,OLR1,OSM,PLAUR,SPP1	1	Adhesion of immune cells	0% (0/1)
3	11	1	CISH	9	CCL3L3,CD14,CSF1,CXCL3,MYC,OLR1,OSM,PLAUR,SPP1	1	Binding of leukocytes	0% (0/1)
3	11	1	peptidoglycan	9	CCL2,CCL5,CXCL2,CXCL3,ITGB2,S100A8,S100A9,TLR2,TLR5	1	Binding of professional phagocytic cells	0% (0/1)
3	11	1	immethridine	9	BTK,C3,Ccl2,Ccl7,CCR5,CD44,CTSS,CXCL3,SPP1	1	Cell movement of lymphatic system cells	0% (0/1)
3	11	1	Hbb-b1	9	Ccl2,Ccl7,CCR5,CD44,CD74,CYBB,FN1,SPI1,TLR2	1	Cell movement of myeloid cells	100% (1/1)
3	11	1	Hbb-b2	9	Ccl2,Ccl7,CCR5,CD44,CD74,CYBB,FN1,SPI1,TLR2	1	Cell movement of myeloid cells	100% (1/1)
3	11	1	Salmonella enterica serotype abortus equi lipopolysaccharide	9	Ccl2,CCL3L3,CCL5,CXCL2,CXCL3,IL18,INHBA,PLAU,THBS1	1	Chemotaxis of myeloid cells	0% (0/1)
3	11	1	Salmonella enterica serotype abortus equi lipopolysaccharide	9	Ccl2,CCL3L3,CCL5,CXCL2,CXCL3,IL18,INHBA,PLAU,THBS1	1	Chemotaxis of phagocytes	0% (0/1)
3	11	1	MDK	9	Ccl2,CCL2,CSF1,CXCL3,LGALS1,S100A8,S100A9,SPP1,TGFB1	1	Chemotaxis of phagocytes	100% (1/1)
3	11	1	IL17F	9	Ccl2,CCL2,CX3CL1,CXCL2,CXCL3,CXCL6,IGF1,LPL,TGFB1	1	Inflammatory response	100% (1/1)
3	18	1	ETS1	16	Ccl2,CCL2,CCL5,CD44,CX3CL1,FASLG,FN1,HMOX1,ITGB2,MET,MMP7,MMP9,PARP1,PLAU,SERPINE1,SPP1	1	Migration of myeloid cells	0% (0/1)
3	11	1	C3	9	Ccl2,CCL2,CCL3L3,CCL5,CSF1,CXCL2,CXCL3,FN1,TGFB1	1	Migration of myeloid cells	100% (1/1)
3	11	1	MDK	9	Ccl2,CCL2,CSF1,CXCL3,LGALS1,S100A8,S100A9,SPP1,TGFB1	1	Migration of phagocytes	100% (1/1)
2.94	16	1	PTGS2	14	Ccl2,CCL2,CCL3L3,CCL5,CD44,CXCL14,CXCL3,DLK1,FABP4,FN1,MMP7,MMP9,NTN1,TGFB1	1	Cell movement of neutrophils	100% (1/1)
2.858	8	1	CCL5	6	AIF1,CCL2,EGF,MMP9,PLAUR,THBS1	1	Growth of muscle tissue	100% (1/1)
2.858	8	1	CCL5	6	AIF1,CCL2,EGF,MMP9,PLAUR,THBS1	1	Proliferation of muscle cells	100% (1/1)
2.846	12	1	E. coli lipopolysaccharide	10	Ccl2,CCL2,CCL5,CEBPA,CXCL2,CXCL3,IL18,MMP9,S100A8,S100A9	1	Accumulation of myeloid cells	100% (1/1)
2.846	12	1	salmonella minnesota R595 lipopolysaccharides	10	Ccl2,CCL2,CCL3L3,CCL5,CXCL2,CXCL3,CXCL6,MET,SERPINE1,TLR2	1	Cell movement of granulocytes	0% (0/1)
2.846	12	1	ADA	10	ADORA1,Ccl2,CXCL2,CXCL3,MMP12,MMP9,SERPINE1,SPP1,TGFB1,TIMP1	1	Cell movement of neutrophils	0% (0/1)
2.846	12	1	IL17RA	10	Ccl2,CCR1,CXCL2,CXCL3,CXCL6,MMP12,MMP9,S100A8,S100A9,TIMP1	1	Cell movement of neutrophils	100% (1/1)
2.846	12	1	enterotoxin B	10	Ccl2,CCL2,CCL22,CCL3L3,CCL5,Ccl7,CXCL2,CXCL3,CXCL6,IL33	1	Recruitment of phagocytes	0% (0/1)
2.846	12	1	immethridine	10	BTK,C3,C5AR1,CCR5,CD14,CD44,CXCL3,FCGR1A,LCN2,SIGLEC1	1	Response of phagocytes	0% (0/1)
2.846	12	1	PTGS2	10	Ccl2,CCL2,CCL3L3,CCL5,CD44,DLK1,FN1,ITGAV,MMP9,TGFB1	1	T cell migration	100% (1/1)
2.828	10	1	5-O-mycolyl-beta-araf-(1->2)-5-O-mycolyl-alpha-araf-(1->1')-glycerol	8	BCL2A1,CCL2,CCL3L3,CD44,CXCL2,CXCL3,MMP9,NT5E	1	Accumulation of myeloid cells	0% (0/1)
2.828	10	1	puromycin aminonucleoside	8	C4A/C4B,CD14,CD44,CYBB,FCGR2A,LCN2,LGALS3,SPP1	1	Activation of myeloid cells	0% (0/1)
2.828	10	1	JQ1	8	Ccl2,CD4,CFTR,CXCL3,IL24,SPP1,TLR2,TNFSF10	1	Activation of myeloid cells	0% (0/1)
2.828	10	1	hexachlorobenzene	8	C4A/C4B,CD14,CD44,FCGR2A,LCN2,LGALS3,MMP9,SPP1	1	Activation of myeloid cells	0% (0/1)
2.828	10	1	ZFTA-RELA	8	Ccl2,CCL3L3,CD44,CSF1,CX3CL1,CXCL2,CXCL3,FN1	1	Adhesion of immune cells	0% (0/1)
2.828	10	1	ZFTA-RELA	8	Ccl2,CCL3L3,CD44,CSF1,CX3CL1,CXCL2,CXCL3,FN1	1	Binding of leukocytes	0% (0/1)
2.828	10	1	IL22	8	C3,CCL5,CXCL2,CXCL3,IL33,LBP,S100A8,S100A9	1	Binding of myeloid cells	0% (0/1)
2.828	10	1	IL17F	8	Ccl2,CCL2,CX3CL1,CXCL2,CXCL3,CXCL6,IGF1,TGFB1	1	Cell movement	100% (1/1)
2.828	10	1	IL36A	8	Ccl7,CXCL2,CXCL3,CXCL6,LCN2,MMP9,S100A8,S100A9	1	Cell movement	100% (1/1)
2.828	10	1	IL36A	8	Ccl7,CXCL2,CXCL3,CXCL6,LCN2,MMP9,S100A8,S100A9	1	Cell movement of blood cells	100% (1/1)
2.828	10	1	phorbol esters	8	CD44,CXCL6,MMP9,OSM,PLAU,SCG2,TGFB1,TIMP1	1	Cell movement of granulocytes	0% (0/1)
2.828	10	1	SRC	8	CCL2,CTSB,F3,FN1,MMP9,PLAU,PLAUR,SPP1	1	Cell movement of granulocytes	0% (0/1)
2.828	10	1	IL36A	8	Ccl7,CXCL2,CXCL3,CXCL6,LCN2,MMP9,S100A8,S100A9	1	Cell movement of leukocytes	100% (1/1)
2.828	10	1	immethridine	8	BTK,C3,Ccl2,CCR5,CD44,CTSS,CXCL3,SPP1	1	Cell movement of lymphocytes	0% (0/1)
2.828	10	1	IL36A	8	Ccl7,CXCL2,CXCL3,CXCL6,LCN2,MMP9,S100A8,S100A9	1	Cell movement of myeloid cells	100% (1/1)
2.828	10	1	MAPKAPK2	8	Ccl2,CCL2,CCL3L3,CXCL2,CXCL3,IL18,MMP9,PLAU	1	Cell movement of neutrophils	100% (1/1)
2.828	10	1	IL36A	8	Ccl7,CXCL2,CXCL3,CXCL6,LCN2,MMP9,S100A8,S100A9	1	Cell movement of phagocytes	100% (1/1)
2.828	10	1	TREM2	8	Ccl2,CCL3L3,CSF1,FABP4,FABP5,LIPA,LPL,PPARG	1	Fatty acid metabolism	100% (1/1)
2.828	10	1	IL36A	8	Ccl7,CXCL2,CXCL3,CXCL6,LCN2,MMP9,S100A8,S100A9	1	Inflammatory response	100% (1/1)
2.828	10	1	CISH	8	CD14,CSF1,HMOX1,MYC,OSM,PLAUR,SLC7A11,SPP1	1	Invasion of cells	0% (0/1)
2.828	10	1	IL36A	8	Ccl7,CXCL2,CXCL3,CXCL6,LCN2,MMP9,S100A8,S100A9	1	Leukocyte migration	100% (1/1)
2.828	10	1	IL36A	8	Ccl7,CXCL2,CXCL3,CXCL6,LCN2,MMP9,S100A8,S100A9	1	Migration of blood cells	100% (1/1)
2.828	10	1	IL17F	8	Ccl2,CCL2,CX3CL1,CXCL2,CXCL3,CXCL6,IGF1,TGFB1	1	Migration of cells	100% (1/1)
2.828	10	1	IL36A	8	Ccl7,CXCL2,CXCL3,CXCL6,LCN2,MMP9,S100A8,S100A9	1	Migration of cells	100% (1/1)
2.828	10	1	ZFTA-RELA	8	Ccl2,CCL3L3,CD44,CSF1,CX3CL1,CXCL2,CXCL3,FN1	1	Migration of myeloid cells	0% (0/1)
2.828	10	1	IL27	8	CCL2,CCL5,CIITA,CX3CL1,IL18,IL1RN,MYC,TNFSF10	1	Proliferation of muscle cells	0% (0/1)
2.828	10	1	CD14	8	Ccl2,CCL2,CCL3L3,CCL5,CXCL2,F3,TGFB1,TLR2	1	Recruitment of myeloid cells	100% (1/1)
2.828	10	1	CD14	8	Ccl2,CCL2,CCL3L3,CCL5,CXCL2,F3,TGFB1,TLR2	1	Recruitment of phagocytes	100% (1/1)
2.714	13	1	Tlr	11	ARG1,Ccl2,CCL2,CCL5,CD80,CD86,CXCL3,IL33,LCN2,TNFSF13,TREM1	1	Activation of myeloid cells	100% (1/1)
2.714	13	1	C3	11	APOE,C3AR1,C5AR1,Ccl2,CCL2,CSF1,CXCL3,FN1,LCN2,TGFB1,THBD	1	Immune response of leukocytes	100% (1/1)
2.683	7	1	ADGRF5	5	Ccl2,CSF1,CXCL3,IL1RN,MMP9	1	Activation of leukocytes	100% (1/1)
2.683	7	1	PLCE1	5	Ccl2,CCL2,CXCL2,CXCL3,GFAP	1	Cellular infiltration	100% (1/1)
2.683	7	1	PLCE1	5	Ccl2,CCL2,CXCL2,CXCL3,GFAP	1	Cellular infiltration by blood cells	100% (1/1)
2.683	7	1	PLCE1	5	Ccl2,CCL2,CXCL2,CXCL3,GFAP	1	Cellular infiltration by leukocytes	100% (1/1)
2.683	7	1	CLEC4E	5	AREG,Ccl2,CSF1,CXCL2,CXCL3	1	Cellular infiltration by myeloid cells	100% (1/1)
2.683	7	1	CD14	5	CCL5,CXCL2,MSR1,TGFB1,TLR2	1	Metabolism of reactive oxygen species	100% (1/1)
2.683	7	1	CCN4	5	CDH2,COL1A1,FN1,MMP9,TGFBR1	1	Migration of cells	100% (1/1)
2.683	7	1	CD14	5	CCL5,CXCL2,MSR1,TGFB1,TLR2	1	Production of reactive oxygen species	100% (1/1)
2.683	7	1	CD14	5	CCL5,CXCL2,MSR1,TGFB1,TLR2	1	Synthesis of reactive oxygen species	100% (1/1)
2.667	11	1	PTPN6	9	Ccl2,CD44,CD5,CD86,CYBB,FN1,ITGB2,MMP9,MYC	1	Activation of leukocytes	100% (1/1)
2.667	11	1	HMGB1	9	CCL2,CD80,CD86,CXCL3,CXCL6,MMP9,PLA2G2A,PTGES,TLR2	1	Activation of myeloid cells	100% (1/1)
2.667	11	1	PLAUR	9	C5AR1,Ccl2,CCL2,CCL5,CTSB,CXCL3,CYBB,MMP9,PLAU	1	Cell movement of granulocytes	100% (1/1)
2.667	11	1	BID	9	C3AR1,C5AR1,Ccl2,CTSB,CTSK,CTSS,ITGAX,MMP12,TIMP1	1	Cell movement of myeloid cells	100% (1/1)
2.667	11	1	RETN	9	Ccl2,CCL2,CX3CL1,CXCL3,FABP4,HMOX1,MMP14,SERPINE1,SPP1	1	Cell movement of myeloid cells	100% (1/1)
2.667	11	1	TGM2	9	C3,C5AR1,CCL2,CD74,FN1,MMP9,S100A8,SPP1,TGFB1	1	Cell movement of neutrophils	0% (0/1)
2.667	11	1	LAMP2	9	CCL2,CSF1,CTSC,CX3CL1,CXCL6,FN1,OSM,TGFB1,TIMP1	1	Cell movement of neutrophils	0% (0/1)
2.667	11	1	carrageenan	9	Ccl2,CCL3L3,CCL5,CXCL2,CXCL3,ESR1,GFAP,PARP1,PTGES	1	Cellular infiltration by leukocytes	100% (1/1)
2.667	11	1	TLR7	9	Ccl2,CCL2,CCL5,Ccl7,CD44,CDKN1A,CXCL2,CXCL3,PLAU	1	Chemotaxis	0% (0/1)
2.667	11	1	CD36	9	CCL1,Ccl2,CCL5,CXCL3,CXCL6,PLAU,PLAUR,SERPINE1,SYK	1	Chemotaxis of phagocytes	0% (0/1)
2.667	11	1	IKBKE	9	Ccl2,CCL5,MMP9,MYC,PDK4,PHGDH,SLC16A1,SLC16A3,SLC2A1	1	Growth of tumor	100% (1/1)
2.667	11	1	TLR7	9	Ccl2,CCL2,CCL5,Ccl7,CD44,CDKN1A,CXCL2,CXCL3,PLAU	1	Homing of leukocytes	0% (0/1)
2.667	11	1	Hbb-b2	9	C1QA,Ccl2,CCR5,CD44,CD74,CIITA,CLEC7A,CYBB,TLR2	1	Infection of mammalia	0% (0/1)
2.667	11	1	Hbb-b1	9	C1QA,Ccl2,CCR5,CD44,CD74,CIITA,CLEC7A,CYBB,TLR2	1	Infection of mammalia	0% (0/1)
2.667	11	1	CARD9	9	C3,C5AR1,CCL5,CCR5,CLEC4E,CLEC7A,CXCL2,TLR2,TLR9	1	Synthesis of reactive oxygen species	100% (1/1)
2.646	9	1	SIGIRR	7	Ccl2,CCL3L3,CXCL2,CXCL3,IL18,S100A8,S100A9	1	Accumulation of myeloid cells	0% (0/1)
2.646	9	1	2-bromoethylamine	7	C4A/C4B,CD14,CD44,FCGR2A,LCN2,LGALS3,SPP1	1	Activation of myeloid cells	0% (0/1)
2.646	9	1	gentamicin C	7	C4A/C4B,CD14,CD44,FCGR2A,LCN2,LGALS3,SPP1	1	Activation of myeloid cells	0% (0/1)
2.646	9	1	lomustine	7	C4A/C4B,CD14,CD44,FCGR2A,LCN2,LGALS3,SPP1	1	Activation of myeloid cells	0% (0/1)
2.646	9	1	fenamic acid	7	C4A/C4B,CD14,CD44,FCGR2A,LCN2,LGALS3,SPP1	1	Activation of myeloid cells	0% (0/1)
2.646	9	1	triamterene	7	C4A/C4B,CD14,CD44,FCGR2A,LCN2,LGALS3,SPP1	1	Activation of myeloid cells	0% (0/1)
2.646	9	1	SIGIRR	7	Ccl2,CCL3L3,CXCL2,CXCL3,IL18,S100A8,S100A9	1	Adhesion of immune cells	0% (0/1)
2.646	9	1	SAA	7	Ccl2,CCL2,CSF1,F3,IL33,MRC1,TLR2	1	Adhesion of immune cells	100% (1/1)
2.646	9	1	SIGIRR	7	Ccl2,CCL3L3,CXCL2,CXCL3,IL18,S100A8,S100A9	1	Binding of leukocytes	0% (0/1)
2.646	9	1	SAA	7	Ccl2,CCL2,CSF1,F3,IL33,MRC1,TLR2	1	Binding of leukocytes	100% (1/1)
2.646	9	1	SIGIRR	7	Ccl2,CCL3L3,CXCL2,CXCL3,IL18,S100A8,S100A9	1	Cell movement of granulocytes	100% (1/1)
2.646	9	1	Hbb-b2	7	Ccl2,CCR5,CD44,CD74,CIITA,FN1,TLR2	1	Cell movement of mononuclear leukocytes	0% (0/1)
2.646	9	1	Hbb-b1	7	Ccl2,CCR5,CD44,CD74,CIITA,FN1,TLR2	1	Cell movement of mononuclear leukocytes	0% (0/1)
2.646	9	1	LAMA5	7	Ccl2,CCL3L3,Ccl7,CCR1,CXCL3,MMP14,MMP9	1	Cell movement of myeloid cells	100% (1/1)
2.646	9	1	Ni2+	7	CCL2,CSF1,CX3CL1,CXCL2,CXCL3,CXCL6,NDRG1	1	Cell movement of myeloid cells	0% (0/1)
2.646	9	1	TRAF6	7	Ccl2,CCL2,CXCL2,CXCL3,CYBB,NCF1,TGFB1	1	Cell movement of neutrophils	0% (0/1)
2.646	9	1	IL-1R	7	CXCL2,CXCL3,MMP12,MMP9,PLAU,SERPINE1,TIMP1	1	Cell movement of neutrophils	100% (1/1)
2.646	9	1	SIGIRR	7	Ccl2,CCL3L3,CXCL2,CXCL3,IL18,S100A8,S100A9	1	Cell movement of neutrophils	100% (1/1)
2.646	9	1	CFB	7	C3,C3AR1,C4A/C4B,C5AR1,CXCL2,CXCL3,THBD	1	Cell movement of neutrophils	100% (1/1)
2.646	9	1	LAMA5	7	Ccl2,CCL3L3,Ccl7,CCR1,CXCL3,MMP14,MMP9	1	Cell movement of phagocytes	0% (0/1)
2.646	9	1	Ni2+	7	CCL2,CSF1,CX3CL1,CXCL2,CXCL3,CXCL6,NDRG1	1	Cell movement of phagocytes	0% (0/1)
2.646	9	1	Fcer1	7	CCL1,Ccl2,CCL2,CCL3L3,CCL5,IL33,TNFRSF9	1	Cell movement of T lymphocytes	0% (0/1)
2.646	9	1	SIGIRR	7	Ccl2,CCL3L3,CXCL2,CXCL3,IL18,S100A8,S100A9	1	Chemotaxis of myeloid cells	0% (0/1)
2.646	9	1	lysophosphatidylinositol	7	C3,CCL2,CD74,CX3CL1,CXCL3,CXCL6,IL33	1	Chemotaxis of phagocytes	0% (0/1)
2.646	9	1	SIGIRR	7	Ccl2,CCL3L3,CXCL2,CXCL3,IL18,S100A8,S100A9	1	Chemotaxis of phagocytes	0% (0/1)
2.646	9	1	MALT1	7	CD44,CXCL3,IRF4,LCN2,MMP9,NT5E,TGFBR1	1	Growth of lesion	100% (1/1)
2.646	9	1	MALT1	7	CD44,CXCL3,IRF4,LCN2,MMP9,NT5E,TGFBR1	1	Growth of tumor	100% (1/1)
2.646	9	1	SIGIRR	7	Ccl2,CCL3L3,CXCL2,CXCL3,IL18,S100A8,S100A9	1	Homing of leukocytes	0% (0/1)
2.646	9	1	NAB2	7	CDKN1A,F3,FN1,PLAU,PPARG,TGFB1,TNFSF10	1	Invasion of cells	0% (0/1)
2.646	9	1	Hbb-b2	7	Ccl2,CCR5,CD44,CD74,CIITA,FN1,TLR2	1	Migration of mononuclear leukocytes	0% (0/1)
2.646	9	1	Hbb-b1	7	Ccl2,CCR5,CD44,CD74,CIITA,FN1,TLR2	1	Migration of mononuclear leukocytes	0% (0/1)
2.646	9	1	lysophosphatidylinositol	7	C3,CCL2,CX3CL1,CXCL3,CXCL6,F3,IL33	1	Migration of myeloid cells	0% (0/1)
2.646	9	1	SIGIRR	7	Ccl2,CCL3L3,CXCL2,CXCL3,IL18,S100A8,S100A9	1	Migration of myeloid cells	0% (0/1)
2.646	9	1	NCF1	7	Ccl2,CCL5,CD44,FN1,HMOX1,SERPINE1,TGFB1	1	Migration of phagocytes	0% (0/1)
2.646	9	1	SIGIRR	7	Ccl2,CCL3L3,CXCL2,CXCL3,IL18,S100A8,S100A9	1	Migration of phagocytes	0% (0/1)
2.646	9	1	N-ethyl-N-nitrosourea	7	CCL2,CCL5,CSF1,CX3CL1,CXCL2,CXCL6,SPP1	1	Recruitment of phagocytes	0% (0/1)
2.598	14	1	ZFP36	12	CCL3L3,CXCL2,CXCL3,CYBB,LCN2,OSM,PLAU,PLAUR,S100A8,S100A9,SPP1,THBD	1	Cell movement of granulocytes	0% (0/1)
2.53	12	1	NFAT5	10	Ccl2,CCL2,CD44,CYBB,IL1RN,LCN2,NRG1,PTGES,SLC7A2,TLR2	1	Activation of macrophages	0% (0/1)
2.53	12	1	PLG	10	CCL2,CSF1,F3,IL1RL1,MMP12,MMP9,PLAU,SERPINE1,SYK,VAV1	1	Cell movement of granulocytes	100% (1/1)
2.53	12	1	C5AR1	10	C3,Ccl2,CXCL2,CXCL3,FCGR2A,IGF1,MMP9,PPARG,SERPINE1,TGFBR1	1	Chemotaxis	100% (1/1)
2.53	12	1	SCD	10	Ccl2,CCL3L3,CXCL3,CXCL6,IL18,LCN2,S100A8,S100A9,SPP1,THBS1	1	Chemotaxis of phagocytes	0% (0/1)
2.53	12	1	LAMP2	10	CCL2,CSF1,CTSD,CX3CL1,FN1,IGF1,ITGAV,OSM,TGFB1,TIMP1	1	Development of body axis	0% (0/1)
2.53	12	1	LAMP2	10	CCL2,CSF1,CTSD,CX3CL1,FN1,IGF1,ITGAV,OSM,TGFB1,TIMP1	1	Development of head	0% (0/1)
2.53	12	1	immethridine	10	BTK,C3,C5AR1,CCR5,CD14,CD44,CXCL3,FCGR1A,LCN2,SIGLEC1	1	Response of myeloid cells	0% (0/1)
2.5	6	1	GSN	4	FN1,PLAU,PLAUR,TGFB1	1	Chemotaxis	100% (1/1)
2.5	6	1	CFB	4	C3,C3AR1,C4A/C4B,C5AR1	1	Damage of kidney	100% (1/1)
2.5	6	1	GSN	4	FN1,PLAU,PLAUR,TGFB1	1	Inflammatory response	100% (1/1)
2.5	6	1	GSN	4	FN1,PLAU,PLAUR,TGFB1	1	Invasion of cells	100% (1/1)
2.5	6	1	P2RX4	4	Ccl2,CXCL2,CXCL3,MMP9	1	Migration of cells	100% (1/1)
2.5	6	1	CD44	4	CCL5,CCR5,LGALS1,SPP1	1	Migration of hepatic stellate cells	100% (1/1)
2.496	15	1	C5	13	ATF3,C3AR1,C5AR1,CCL2,CCL3L3,CD63,CXCL3,CYBB,FCGR1A,FCGR2A,FCGR2B,ITGB2,MMP9	1	Degranulation of phagocytes	100% (1/1)
2.475	10	1	LGALS3	8	Ccl2,CCL2,CCL3L3,CCR1,CEBPA,CXCL2,CXCL3,SPP1	1	Accumulation of myeloid cells	0% (0/1)
2.475	10	1	PLAT	8	CCL3L3,FN1,GFAP,INHBA,MMP9,MYC,SERPINE1,TGFB1	1	Activation of cells	100% (1/1)
2.475	10	1	aldosterone	8	APLN,ATP1B1,CCL5,FN1,OLR1,SGK1,TGFB1,TIMP1	1	Aggregation of cells	0% (0/1)
2.475	10	1	NCF1	8	CCL5,CD44,CDKN1A,F3,FN1,IGF1,TGFB1,THBD	1	Aggregation of cells	0% (0/1)
2.475	10	1	UTP	8	Ccl2,CCL2,CD14,CDH2,F3,SERPINE1,SPP1,THBS1	1	Binding of tumor cell lines	100% (1/1)
2.475	10	1	LAMP2	8	CCL2,CSF1,CX3CL1,FN1,IGF1,ITGAV,OSM,TGFB1	1	Binding of tumor cell lines	0% (0/1)
2.475	10	1	phenylbutazone	8	C4A/C4B,CD44,FCGR2A,LCN2,LGALS3,SPP1,STING1,TIMP1	1	Cell movement of myeloid cells	0% (0/1)
2.475	10	1	lysophosphatidylcholine	8	Ccl2,CCL2,CCL3L3,CCL5,CD74,CYBB,PLAU,SERPINE1	1	Cell movement of neutrophils	0% (0/1)
2.475	10	1	KLF6	8	Ccl2,CCL2,CCL3L3,COL1A1,DLK1,MMP9,NR4A1,TGFB1	1	Cell movement of T lymphocytes	0% (0/1)
2.475	10	1	ADA	8	Ccl2,CXCL2,CXCL3,MMP12,MMP9,SPP1,TGFB1,TIMP1	1	Cellular infiltration by phagocytes	0% (0/1)
2.475	10	1	D-fructose	8	Ccl2,Ccl7,CXCL2,FN1,HP,PPARG,TGFB1,THBS1	1	Chemotaxis	0% (0/1)
2.475	10	1	Bay 11-7082	8	Ccl2,CCL2,CCL3L3,CCL5,CXCL2,CXCL3,MMP7,TLR2	1	Chemotaxis of phagocytes	0% (0/1)
2.475	10	1	KLF6	8	Ccl2,CCL2,CCL3L3,CDKN1A,CXCL2,PLAU,TGFB1,VEGFA	1	Chemotaxis of phagocytes	0% (0/1)
2.475	10	1	TGM2	8	C3,CCL2,CCL22,FN1,MERTK,SLAMF7,TGFB1,THBS1	1	Immune response of myeloid cells	100% (1/1)
2.475	10	1	LAMP2	8	CCL2,CSF1,CX3CL1,FN1,IGF1,ITGAV,OSM,TGFB1	1	Interaction of tumor cell lines	0% (0/1)
2.475	10	1	UTP	8	Ccl2,CCL2,CD14,CDH2,F3,SERPINE1,SPP1,THBS1	1	Interaction of tumor cell lines	100% (1/1)
2.475	10	1	UTP	8	Ccl2,CCL2,CD14,CDH2,F3,SERPINE1,SPP1,THBS1	1	Migration of cells	100% (1/1)
2.475	10	1	plicamycin	8	CCL2,COL1A1,CX3CL1,F3,HMOX1,MET,PLAUR,SERPINE1	1	Migration of myeloid cells	0% (0/1)
2.475	10	1	NOX4	8	Ccl2,CCL2,CD44,COL1A1,CYBB,FN1,HMOX1,SERPINE1	1	Migration of myeloid cells	0% (0/1)
2.449	8	1	TRADD	6	BCL2A1,CCL2,CX3CL1,CXCL2,CXCL3,MMP9	1	Accumulation of myeloid cells	0% (0/1)
2.449	8	1	Pam3-Cys	6	CCL2,CCL5,CD14,IL1RL1,IL1RN,TLR2	1	Activation of macrophages	0% (0/1)
2.449	8	1	ethionine	6	C4A/C4B,CD14,CD44,LCN2,LGALS3,SPP1	1	Activation of myeloid cells	0% (0/1)
2.449	8	1	ethionine	6	C4A/C4B,CD14,CD44,LCN2,LGALS3,SPP1	1	Activation of phagocytes	0% (0/1)
2.449	8	1	ethionine	6	C4A/C4B,CD14,CD44,LGALS3,MYC,SPP1	1	Adhesion of blood cells	0% (0/1)
2.449	8	1	CSF1R	6	CCL3L3,CSF1,MRC1,MSR1,MYC,SPI1	1	Adhesion of immune cells	0% (0/1)
2.449	8	1	NCSTN	6	CD14,CSF2RB,FCGR2A,FCGR2B,Ly6a (includes others),SPI1	1	Binding of leukocytes	0% (0/1)
2.449	8	1	CSF1R	6	CCL3L3,CSF1,MRC1,MSR1,MYC,SPI1	1	Binding of leukocytes	0% (0/1)
2.449	8	1	PIN1	6	CDH2,ESR1,FN1,HSPA5,PGR,TGFB1	1	Binding of tumor cell lines	0% (0/1)
2.449	8	1	ABCG1	6	Ccl2,CCL3L3,CCR5,CXCL3,SFTPD,TGFB1	1	Cell movement of antigen presenting cells	0% (0/1)
2.449	8	1	NFKBIZ	6	Ccl2,CCL3L3,CXCL3,LCN2,S100A8,S100A9	1	Cell movement of granulocytes	100% (1/1)
2.449	8	1	vitamin E	6	CCL2,CD44,F3,SERPINE1,SPP1,TGFB1	1	Cell movement of granulocytes	0% (0/1)
2.449	8	1	ARRB2	6	Ccl2,CXCL2,CXCL3,F3,SERPINE1,TGFB1	1	Cell movement of granulocytes	100% (1/1)
2.449	8	1	tyrphostin AG 1478	6	AREG,CCL2,F3,MMP9,NCF1,PLAU	1	Cell movement of granulocytes	0% (0/1)
2.449	8	1	ozone	6	Ccl2,CCL3L3,CXCL3,HMOX1,MMP12,SPP1	1	Cell movement of macrophages	0% (0/1)
2.449	8	1	Ccl6	6	Ccl2,CCL3L3,CTSK,CTSS,MMP9,SERPINA1	1	Cell movement of myeloid cells	0% (0/1)
2.449	8	1	NFKBIZ	6	Ccl2,CCL3L3,CXCL3,LCN2,S100A8,S100A9	1	Cell movement of neutrophils	100% (1/1)
2.449	8	1	Ccl6	6	Ccl2,CCL3L3,CTSK,CTSS,MMP9,SERPINA1	1	Cell movement of phagocytes	0% (0/1)
2.449	8	1	ABCG1	6	Ccl2,CCL3L3,CCR5,CXCL3,SFTPD,TGFB1	1	Cell movement of phagocytes	0% (0/1)
2.449	8	1	ITGA11	6	FN1,IGF1,MMP14,SPP1,TGFB1,THBS1	1	Chemotaxis	0% (0/1)
2.449	8	1	NFKBIZ	6	Ccl2,CCL3L3,CXCL3,LCN2,S100A8,S100A9	1	Chemotaxis of myeloid cells	0% (0/1)
2.449	8	1	Pam3-Cys	6	CCL2,CCL5,CXCL2,CXCL3,SERPINE1,TLR2	1	Chemotaxis of myeloid cells	0% (0/1)
2.449	8	1	NFKBIZ	6	Ccl2,CCL3L3,CXCL3,LCN2,S100A8,S100A9	1	Chemotaxis of phagocytes	0% (0/1)
2.449	8	1	Pam3-Cys	6	CCL2,CCL5,CXCL2,CXCL3,SERPINE1,TLR2	1	Chemotaxis of phagocytes	0% (0/1)
2.449	8	1	NFKBIZ	6	Ccl2,CCL3L3,CXCL3,LCN2,S100A8,S100A9	1	Homing of leukocytes	0% (0/1)
2.449	8	1	ATF4	6	ABCA1,CCL2,FN1,LGALS3,PPARG,PTX3	1	Immune response of myeloid cells	0% (0/1)
2.449	8	1	TRADD	6	BCL2A1,CCL2,CX3CL1,CXCL2,CXCL3,MMP9	1	Inflammatory response	100% (1/1)
2.449	8	1	roscovitine	6	CD44,CDKN1A,CEBPA,FN1,MYC,PPARG	1	Invasion of cells	0% (0/1)
2.449	8	1	nitroarginine	6	CCL2,CD44,CD53,HMOX1,SPP1,TGFB1	1	Invasion of cells	0% (0/1)
2.449	8	1	MAP2K1/2	6	C3,Ccl2,CCL3L3,CXCL3,EGR2,MMP9	1	Lymphocyte migration	0% (0/1)
2.449	8	1	HMGB1	6	CD83,CXCL3,FASN,PLA2G2A,PTGES,TLR2	1	Metabolism of eicosanoid	100% (1/1)
2.449	8	1	MLN120B	6	ACP5,Ccl2,CTSB,CTSK,CXCL2,CXCL6	1	Migration of cells	100% (1/1)
2.449	8	1	C9	6	Ccl2,CCL3L3,COL1A1,CXCL2,CXCL3,FN1	1	Migration of cells	0% (0/1)
2.449	8	1	E. coli B5 lipopolysaccharide	6	CCL2,CCL5,CCR5,CD44,NCF1,SPP1	1	Migration of hepatic stellate cells	0% (0/1)
2.449	8	1	tetradecanoylphorbol acetate	6	CCL2,CCL5,CD44,IGF1,NCF1,SPP1	1	Migration of hepatic stellate cells	0% (0/1)
2.449	8	1	APOE	6	CCL5,CCR5,CD44,IGF1,NCF1,SPP1	1	Migration of hepatic stellate cells	0% (0/1)
2.449	8	1	tyrphostin AG490	6	Ccl2,CCL2,CCL5,CXCL2,MMP9,SPP1	1	Migration of myeloid cells	0% (0/1)
2.449	8	1	MAP2K1/2	6	C3,Ccl2,CCL3L3,CXCL3,HMOX1,MMP9	1	Migration of myeloid cells	0% (0/1)
2.449	8	1	nitroarginine	6	CCL2,Ccl9,CD44,HMOX1,SPP1,TGFB1	1	Migration of phagocytes	100% (1/1)
2.449	8	1	tempol	6	CXCL2,MMP9,PLAUR,SERPINE1,SPP1,TGFB1	1	Migration of phagocytes	0% (0/1)
2.449	8	1	MAP2K1/2	6	C3,Ccl2,CCL3L3,CHI3L1,CXCL3,MMP9	1	Recruitment of myeloid cells	0% (0/1)
2.449	8	1	ARRB2	6	Ccl2,CXCL2,CXCL3,F3,SERPINE1,TGFB1	1	Recruitment of myeloid cells	100% (1/1)
2.449	8	1	valsartan	6	Ccl2,F3,PPARG,SERPINE1,SPP1,TGFB1	1	Recruitment of myeloid cells	0% (0/1)
2.449	8	1	ARRB2	6	Ccl2,CXCL2,CXCL3,F3,SERPINE1,TGFB1	1	Recruitment of phagocytes	100% (1/1)
2.449	8	1	valsartan	6	Ccl2,F3,PPARG,SERPINE1,SPP1,TGFB1	1	Recruitment of phagocytes	0% (0/1)
2.425	19	1	C5	17	ATF3,C3AR1,C5AR1,CCL2,CCL3L3,CD63,CXCL3,CYBB,FCGR1A,FCGR2A,FCGR2B,FN1,ITGB2,MMP9,SERPINE1,TGFB1,VEGFA	1	Degranulation of cells	100% (1/1)
2.412	13	1	SPP1	11	Ccl2,CCL2,CCL3L3,CCL5,CD40LG,CD44,COL1A1,FN1,ITGAV,MMP9,TGFB1	1	Cell movement of T lymphocytes	100% (1/1)
2.412	13	1	S100A4	11	CCL1,CCL5,Ccl9,CXCL3,FN1,MMP14,MMP9,PLAU,S100A8,S100A9,TIMP1	1	Migration of phagocytes	0% (0/1)
2.405	16	1	imiquimod	14	Ccl2,CCL22,CCL3L3,CCL5,CD80,CXCL3,HCK,HMOX1,IL18,IL1RN,ITGB2,S100A8,TGFB1,TLR7	1	Cell movement of antigen presenting cells	0% (0/1)
2.353	28	1	cardiotoxin	26	C5AR1,CCL11,Ccl2,CCL2,CD180,CSF1,CSF2RB,CTSB,CX3CL1,FASLG,GSN,IL15,IL18,IL33,ITGB2,LCN2,MERTK,MRC1,OSM,S100A8,S100A9,SERPINE1,TGFB1,THBS1,TREM1,VEGFA	1	Immune response of cells	0% (0/1)
2.333	11	1	MAP3K1	9	ATF3,FASLG,HMOX1,PGR,SERPINE1,TGFB1,THBS1,TIMP1,TOP2A	1	Inflammation of respiratory system	0% (0/1)
2.333	11	1	TSH	9	CDKN1A,CTSS,GNAI1,IGFBP5,KDR,KRT14,MYC,SLC2A1,SOD2	1	Invasion of cells	0% (0/1)
2.333	11	1	deoxycorticosterone acetate/potassium chloride/sodium chloride	9	Ccl2,CCL5,CCR5,COL1A1,CXCL2,CYBB,ESR1,FN1,SPP1	1	Migration of cells	100% (1/1)
2.333	11	1	desoxycorticosterone	9	Ccl2,CCR5,COL1A1,CXCL2,CYBB,MMP12,SERPINE1,SPP1,TGFB1	1	Migration of cells	100% (1/1)
2.309	29	1	cholesterol	27	APOE,AREG,CCL1,Ccl2,CCL2,COL1A1,CSF1,CTSK,CXCL3,DHCR7,F3,FASLG,FCGR2B,FN1,IHH,INHBA,LGALS3,MAP2,MAPT,Meis1,MITF,MMP14,PPARG,SHH,TGFB1,THBS1,TIMP1	1	Development of head	0% (0/1)
2.309	5	1	G6PD	3	FABP4,FASN,PPARG	1	Fatty acid metabolism	100% (1/1)
2.309	5	1	CFB	3	C3,C4A/C4B,C5AR1	1	Increased Levels of Blood Urea Nitrogen	100% (1/1)
2.309	5	1	IGF1	3	CCL5,CD44,SPP1	1	Migration of hepatic stellate cells	100% (1/1)
2.309	5	1	CFB	3	C3,C3AR1,C5AR1	1	Reperfusion injury of kidney	100% (1/1)
2.268	9	1	estriol	7	CCL1,Ccl2,CCL2,IL1RN,ITGB2,TLR6,TLR9	1	Activation of macrophages	0% (0/1)
2.268	9	1	cuprizone	7	Ccl2,CCL3L3,CCL5,CTSZ,LCP1,LGALS1,LGALS3	1	Adhesion of immune cells	0% (0/1)
2.268	9	1	cuprizone	7	Ccl2,CCL3L3,CCL5,CTSZ,LCP1,LGALS1,LGALS3	1	Binding of leukocytes	0% (0/1)
2.268	9	1	OLR1	7	CCL2,CYBB,FN1,NCF1,SPP1,TGFB1,TGFBR1	1	Cell movement of granulocytes	0% (0/1)
2.268	9	1	Mek	7	APOE,Ccl2,EPAS1,MMP9,NT5E,OSM,SERPINE1	1	Cell movement of neutrophils	100% (1/1)
2.268	9	1	OLR1	7	CCL2,CYBB,FN1,NCF1,SPP1,TGFB1,TGFBR1	1	Cell movement of neutrophils	0% (0/1)
2.268	9	1	Srgn	7	ITGAX,Mcpt4,MMP9,S100A9,THBS1,TPSAB1/TPSB2,TREM1	1	Cell movement of phagocytes	0% (0/1)
2.268	9	1	2,4-dinitrofluorobenzene	7	ARG1,Ccl2,CCL3L3,CXCL2,IL18,IL24,PTGES	1	Cellular infiltration	100% (1/1)
2.268	9	1	MEOX2	7	CCL2,CDKN1A,CXCL2,CXCL3,CXCL6,ITGAV,MMP14	1	Chemotaxis	0% (0/1)
2.268	9	1	Alpha catenin	7	CXCL2,CXCL6,MMP9,PLAU,S100A8,S100A9,THBS2	1	Chemotaxis of leukocytes	0% (0/1)
2.268	9	1	SOST	7	Ccl2,CCL3L3,FABP4,FASN,LPL,PLIN2,PPARG	1	Fatty acid metabolism	0% (0/1)
2.268	9	1	estriol	7	Ccl2,CCL2,CXCL3,FASLG,ITGB2,TLR7,TLR9	1	Immune response of cells	0% (0/1)
2.268	9	1	C3	7	C3AR1,CCL2,CSF1,CXCL3,FN1,LCN2,TGFB1	1	Immune response of phagocytes	100% (1/1)
2.268	9	1	MAP3K1	7	ATF3,FASLG,HMOX1,TGFB1,THBS1,TIMP1,TOP2A	1	Inflammation of lung	0% (0/1)
2.268	9	1	2,4-dinitrofluorobenzene	7	ARG1,Ccl2,CCL3L3,CXCL2,IL18,IL24,PTGES	1	Inflammatory response	100% (1/1)
2.268	9	1	MEOX2	7	CCL2,CXCL2,CXCL3,CXCL6,F3,ITGAV,MMP14	1	Migration of myeloid cells	0% (0/1)
2.268	9	1	TNFSF12	7	CCL2,CCL5,HEY1,MMP9,PF4,TIMP1,TNFRSF12A	1	Proliferation of muscle cells	100% (1/1)
2.268	9	1	tunicamycin	7	Ccl2,CXCL2,CXCL3,MMP9,PPARG,TLR2,TRPC6	1	Recruitment of myeloid cells	0% (0/1)
2.268	9	1	tunicamycin	7	Ccl2,CXCL2,CXCL3,MMP9,PPARG,TLR2,TRPC6	1	Recruitment of phagocytes	0% (0/1)
2.268	9	1	kainic acid	7	CCL5,CD44,FN1,IL18,LCN2,PLAU,PLAUR	1	Response of phagocytes	0% (0/1)
2.268	9	1	diphenyleneiodonium	7	Ccl2,CCL2,COL1A1,FN1,MMP9,TGFB1,THBS2	1	T cell migration	0% (0/1)
2.236	7	1	phenacetin	5	CD44,LCN2,LGALS3,MYC,SPP1	1	Activation of leukocytes	0% (0/1)
2.236	7	1	TRPV4	5	Ccl2,CCL5,HMOX1,THBS1,TLR2	1	Activation of macrophages	0% (0/1)
2.236	7	1	cytarabine	5	CCL3L3,CCL5,CD80,CD86,TLR2	1	Adhesion of immune cells	0% (0/1)
2.236	7	1	SLC7A2	5	ARG1,CCL3L3,CXCL2,CXCL3,CXCL6	1	Cell movement	0% (0/1)
2.236	7	1	phenacetin	5	CD44,LCN2,LGALS3,SPP1,TIMP1	1	Cell movement of granulocytes	0% (0/1)
2.236	7	1	sitagliptin	5	Ccl2,FABP4,FN1,LGALS3,TGFB1	1	Cell movement of granulocytes	0% (0/1)
2.236	7	1	B4GALNT1	5	C3,C3AR1,C4A/C4B,C5AR1,VEGFA	1	Cell movement of leukocytes	0% (0/1)
2.236	7	1	CDH1	5	CD44,FN1,MMP14,MMP9,TGFB1	1	Cell movement of lymphocytes	0% (0/1)
2.236	7	1	helenalin	5	CXCL3,CXCL6,HMOX1,MMP9,PLA2G4A	1	Cell movement of myeloid cells	0% (0/1)
2.236	7	1	SEMA7A	5	CTSB,FN1,IL18,TGFB1,TIMP1	1	Cell movement of neutrophils	0% (0/1)
2.236	7	1	USP38	5	CXCL2,CXCL3,FN1,IL1RL1,TIMP1	1	Cell movement of neutrophils	0% (0/1)
2.236	7	1	PTPRJ	5	CCL3L3,CXCL2,CXCL3,IL18,MET	1	Cell movement of neutrophils	0% (0/1)
2.236	7	1	helenalin	5	CXCL3,CXCL6,HMOX1,MMP9,PLA2G4A	1	Cell movement of phagocytes	0% (0/1)
2.236	7	1	sitagliptin	5	Ccl2,FABP4,FN1,LGALS3,TGFB1	1	Cell movement of phagocytes	100% (1/1)
2.236	7	1	PTGER2	5	CCL3L3,CCL5,MMP9,SPP1,THBS1	1	Cell movement of T lymphocytes	0% (0/1)
2.236	7	1	TRPV4	5	Ccl2,CCL3L3,CCL5,THBS1,TLR2	1	Cell movement of T lymphocytes	0% (0/1)
2.236	7	1	FKBP10	5	IL1RL1,LBP,MMP12,SPP1,TIMP1	1	Cellular infiltration by myeloid cells	0% (0/1)
2.236	7	1	etanercept	5	CCL2,CYBB,MMP12,NCF1,PTGES	1	Cellular infiltration by myeloid cells	0% (0/1)
2.236	7	1	PTPRJ	5	CXCL2,CXCL3,IL18,MET,TNFSF8	1	Cellular infiltration by myeloid cells	0% (0/1)
2.236	7	1	FKBP10	5	IL1RL1,LBP,MMP12,SPP1,TIMP1	1	Cellular infiltration by phagocytes	0% (0/1)
2.236	7	1	etanercept	5	CCL2,CYBB,MMP12,NCF1,PTGES	1	Cellular infiltration by phagocytes	0% (0/1)
2.236	7	1	ST8SIA1	5	C1QA,C3,C3AR1,C4A/C4B,C5AR1	1	Damage of kidney	0% (0/1)
2.236	7	1	B4GALNT1	5	C1QA,C3,C3AR1,C4A/C4B,C5AR1	1	Damage of kidney	0% (0/1)
2.236	7	1	hydrogen peroxide	5	Ccl2,CCL2,CCL3L3,CCR5,MMP9	1	Experimental autoimmune myocarditis	0% (0/1)
2.236	7	1	NR3C1	5	Ccl2,CCL2,CCL3L3,CCR5,MMP9	1	Experimental autoimmune myocarditis	0% (0/1)
2.236	7	1	IL13	5	Ccl2,CCL2,CCL3L3,CCR5,MMP9	1	Experimental autoimmune myocarditis	0% (0/1)
2.236	7	1	TLR4	5	Ccl2,CCL2,CCL3L3,CCR5,MMP9	1	Experimental autoimmune myocarditis	0% (0/1)
2.236	7	1	AGT	5	Ccl2,CCL2,CCL3L3,CCR5,MMP9	1	Experimental autoimmune myocarditis	0% (0/1)
2.236	7	1	bleomycin	5	Ccl2,CCL2,CCL3L3,CCR5,MMP9	1	Experimental autoimmune myocarditis	0% (0/1)
2.236	7	1	TNFSF12	5	Ccl2,CCL2,CCL3L3,CCR5,MMP9	1	Experimental autoimmune myocarditis	0% (0/1)
2.236	7	1	hemozoin	5	Ccl2,CCL2,CCL3L3,CCR5,MMP9	1	Experimental autoimmune myocarditis	0% (0/1)
2.236	7	1	CARM1	5	ABCB11,Ccl2,CXCL3,MYC,PTGES	1	Fatty acid metabolism	0% (0/1)
2.236	7	1	CpG ODN 2395	5	Ccl2,CD14,CD86,HMOX1,IGHE	1	Immune response of cells	0% (0/1)
2.236	7	1	B4GALNT1	5	C1QA,C3,C3AR1,C5AR1,VEGFA	1	Immune response of cells	0% (0/1)
2.236	7	1	sitagliptin	5	Ccl2,FABP4,FN1,LGALS3,TGFB1	1	Inflammatory response	0% (0/1)
2.236	7	1	SLC7A2	5	ARG1,CCL3L3,CXCL2,CXCL3,CXCL6	1	Inflammatory response	100% (1/1)
2.236	7	1	xanthine	5	CCR5,MMP14,PLAU,PLAUR,SLC2A1	1	Invasion of cells	100% (1/1)
2.236	7	1	Collagen Alpha1	5	CDH2,CDKN1A,MMP9,PLAU,PLAUR	1	Invasion of cells	0% (0/1)
2.236	7	1	L2HGDH	5	AIF1,CCL3L3,CLEC7A,CYBB,ITGAX	1	Migration of cells	0% (0/1)
2.236	7	1	B4GALT1	5	Ccl2,CCL3L3,COL1A1,CXCL3,TGFB1	1	Migration of cells	100% (1/1)
2.236	7	1	edaravone	5	Ccl2,CCL2,CXCL3,FASN,HSPA5	1	Migration of cells	0% (0/1)
2.236	7	1	xanthine	5	CCR5,MMP14,PLAU,PLAUR,SLC2A1	1	Migration of cells	0% (0/1)
2.236	7	1	LY294002	5	CCL2,CCL5,CD44,IGF1,SPP1	1	Migration of hepatic stellate cells	0% (0/1)
2.236	7	1	STAT3	5	CCL2,CCL5,CCR5,CD44,SPP1	1	Migration of hepatic stellate cells	0% (0/1)
2.236	7	1	bleomycin	5	CCL2,CCL5,CCR5,IGF1,SPP1	1	Migration of hepatic stellate cells	0% (0/1)
2.236	7	1	TNFSF11	5	CCL2,CCL5,CD44,IGF1,SPP1	1	Migration of hepatic stellate cells	0% (0/1)
2.236	7	1	IL1A	5	CCL2,CCL5,CD44,IGF1,SPP1	1	Migration of hepatic stellate cells	0% (0/1)
2.236	7	1	homocysteine	5	Ccl2,CCL2,CCL5,F3,HMOX1	1	Migration of myeloid cells	0% (0/1)
2.236	7	1	prexasertib	5	C3,HMOX1,MMP9,SERPINE1,TNFRSF9	1	Migration of phagocytes	0% (0/1)
2.236	7	1	ST8SIA1	5	C3,C3AR1,C4A/C4B,C5AR1,MMP9	1	Recruitment of leukocytes	0% (0/1)
2.236	7	1	CpG ODN 2395	5	Ccl2,CCL3L3,CD14,FCER2,IGHE	1	Recruitment of myeloid cells	0% (0/1)
2.236	7	1	1-palmitoyl-2-oleoylphosphatidylserine	5	CCL3L3,CXCL2,CXCL3,OSM,TGFB1	1	Recruitment of phagocytes	0% (0/1)
2.236	7	1	xanthine	5	CCR5,MMP14,PLAU,PLAUR,SLC2A1	1	Synthesis of reactive oxygen species	100% (1/1)
2.219	15	1	CCR2	13	CCL2,CCL22,CCL5,CCR1,CCR5,CD86,CSF1,CX3CL1,CXCL3,FN1,IL18,TGFB1,THBS1	1	Response of phagocytes	100% (1/1)
2.138	16	1	halofuginone	14	C4A/C4B,CD44,COL1A1,CTSK,CTSS,FN1,IGFBP3,IL33,LGALS1,MMP9,REG3A,SPP1,TGFB1,TIMP1	1	Cell movement of myeloid cells	0% (0/1)
2.138	16	1	GLIS2	14	C3,Ccl2,CCL22,COL1A1,CXCL3,IL15,IL33,LTBP2,MGP,MMP14,OSM,SERPINE1,TGFB1,TNFSF13	1	Migration of cells	100% (1/1)
2.121	10	1	CNTF	8	CCL5,CP,PF4,TGFB1,TIMP1,TLR2,TLR7,VAV1	1	Aggregation of cells	0% (0/1)
2.121	10	1	IL17F	8	Ccl2,CCL2,CXCL2,CXCL3,CXCL6,IGF1,LPL,TGFB1	1	Cancer of cells	0% (0/1)
2.121	10	1	CFB	8	ACTC1,ARG1,C3,C4A/C4B,CXCL2,CXCL3,FASN,THBD	1	Cerebral disorder	100% (1/1)
2.121	4	1	CFB	2	C3,C5AR1	1	Increased Levels of Creatinine	100% (1/1)
2.121	10	1	MAP3K1	8	ATF3,FASLG,HMOX1,PGR,TGFB1,THBS1,TIMP1,TOP2A	1	Inflammation of respiratory system component	0% (0/1)
2.121	10	1	CpG ODN 1826	8	CCL3L3,CCL5,CD14,CD83,CXCL3,FCGR1A,FCGR2B,NCF1	1	Metabolism of eicosanoid	100% (1/1)
2.121	10	1	IL17F	8	Ccl2,CCL2,CXCL2,CXCL3,CXCL6,IGF1,LPL,TGFB1	1	Neoplasia of cells	0% (0/1)
2.121	10	1	carbon tetrachloride	8	CCL5,CCR1,CCR5,FN1,HMOX1,PPARG,PTAFR,TGFB1	1	Response of phagocytes	0% (0/1)
2.121	10	1	vancomycin	8	C3,CD14,CD44,CSF1,FCGR2A,HMOX1,LCN2,LGALS3	1	Response of phagocytes	100% (1/1)
2.066	17	1	Tnf (family)	15	ATF3,C3AR1,CCL2,CCR1,CSTB,CX3CL1,CXCL3,FCGR1A,IGF1,IL33,LCN2,MMP9,SERPINE1,TLR2,TNFRSF9	1	Degranulation	0% (0/1)
2.041	8	1	PIK3CG	6	ARG1,Ccl2,HMOX1,PRF1,TGFB1,TLR2	1	Activation of macrophages	0% (0/1)
2.041	8	1	emodin	6	ARG1,Ccl2,CD86,CXCL3,FN1,MMP9	1	Activation of myeloid cells	100% (1/1)
2.041	8	1	emodin	6	ARG1,Ccl2,CD86,CXCL3,FN1,MMP9	1	Activation of phagocytes	100% (1/1)
2.041	8	1	spironolactone	6	Ccl2,FN1,LGALS3,PPARG,TGFB1,VEGFA	1	Binding of tumor cell lines	0% (0/1)
2.041	8	1	PTPN3	6	COL1A1,FN1,ITGAV,MMP9,SERPINE1,TGFBR1	1	Cell movement of mononuclear leukocytes	0% (0/1)
2.041	8	1	SOCS1	6	Ccl2,CCL2,CD44,CXCL2,MMP12,VAV1	1	Cell movement of neutrophils	0% (0/1)
2.041	8	1	SAMSN1	6	CCL3L3,Ccl7,CXCL2,IL18,INHBA,MARCO	1	Chemotaxis of phagocytes	0% (0/1)
2.041	8	1	Ifn	6	IL33,LCN2,S100A8,SERPINE1,SPP1,TLR2	1	Chemotaxis of phagocytes	0% (0/1)
2.041	8	1	C3	6	C3AR1,C5AR1,CCL2,CCL3L3,CXCL3,LCN2	1	Degranulation of myeloid cells	100% (1/1)
2.041	8	1	PARP2	6	CCL5,CD83,FABP4,FASN,LPL,PPARG	1	Fatty acid metabolism	0% (0/1)
2.041	8	1	PRKCB	6	CCL11,CD83,FASN,FN1,MYC,TGFB1	1	Fatty acid metabolism	0% (0/1)
2.041	8	1	SYVN1	6	ATP1A1,BHLHE40,CD44,F3,IL18,SLC1A5	1	Immune response of leukocytes	0% (0/1)
2.041	8	1	Notch	6	CAPG,CARD9,CSF2RB,FCGR2A,FCGR2B,PLAU	1	Immune response of leukocytes	0% (0/1)
2.041	8	1	spironolactone	6	Ccl2,FASN,FN1,PPARG,TGFB1,VEGFA	1	Metabolism of eicosanoid	0% (0/1)
2.041	8	1	RHOA	6	COL1A1,FN1,MMP14,MMP9,PLAU,TGFB1	1	Migration of phagocytes	100% (1/1)
2.041	8	1	IL6R	6	CCL2,CCL5,COL1A1,FN1,MMP9,TGFB1	1	T cell migration	0% (0/1)
2.021	14	1	CCL5	12	Ccl2,CCL2,CCL3L3,CCR1,CCR5,CD44,CXCL2,EGF,MMP9,OLR1,PLAUR,THBS1	1	Vaso-occlusion	0% (0/1)
2	6	1	belnacasan	4	Ccl2,CCL3L3,CXCL3,IL18	1	Accumulation of myeloid cells	0% (0/1)
2	6	1	FOXL2	4	BCL2A1,CCL3L3,CXCL2,CXCL3	1	Accumulation of myeloid cells	0% (0/1)
2	6	1	C8	4	Ccl2,CCL3L3,CXCL2,CXCL3	1	Accumulation of myeloid cells	0% (0/1)
2	6	1	C7	4	Ccl2,CCL3L3,CXCL2,CXCL3	1	Accumulation of myeloid cells	0% (0/1)
2	6	1	belnacasan	4	Ccl2,CCL3L3,CXCL3,IL18	1	Activation of cells	0% (0/1)
2	6	1	bromodeoxyuridine	4	CSF1,IL24,INHBA,TNFSF10	1	Activation of myeloid cells	0% (0/1)
2	6	1	laminaran	4	CLEC4E,CRLF2,INHBA,TNFRSF9	1	Activation of myeloid cells	0% (0/1)
2	11	1	CD38	9	CCL22,CD40LG,CD44,CD86,FN1,LGALS3,NDRG1,TGFB1,THY1	1	Activation of myeloid cells	0% (0/1)
2	6	1	bromodeoxyuridine	4	CSF1,IL24,INHBA,TNFSF10	1	Activation of phagocytes	0% (0/1)
2	6	1	laminaran	4	CLEC4E,CRLF2,INHBA,TNFRSF9	1	Activation of phagocytes	0% (0/1)
2	6	1	belnacasan	4	Ccl2,CCL3L3,CXCL3,IL18	1	Adhesion of immune cells	0% (0/1)
2	6	1	C8	4	Ccl2,CCL3L3,CXCL2,CXCL3	1	Adhesion of immune cells	0% (0/1)
2	6	1	C7	4	Ccl2,CCL3L3,CXCL2,CXCL3	1	Adhesion of immune cells	0% (0/1)
2	6	1	as605240	4	CXCL2,CXCL3,MMP9,TGFB1	1	Advanced malignant tumor	0% (0/1)
2	11	1	1-methyl-4-phenyl-1,2,3,6-tetrahydropyridine	9	Ccl2,CCL5,CSF1,CYBB,HMOX1,IL18,LMCD1,OSM,SOD2	1	Advanced malignant tumor	0% (0/1)
2	6	1	WLS	4	BMPR2,Ccl2,CXCL2,FGF9	1	Advanced malignant tumor	100% (1/1)
2	6	1	CHD1	4	CXCL2,CXCL3,CXCL6,SOD2	1	Advanced malignant tumor	100% (1/1)
2	6	1	CAY10585	4	ADORA2B,Ccl2,CCL2,NT5E	1	Advanced malignant tumor	0% (0/1)
2	6	1	mir-19	4	CDKN1A,F3,THBS1,TLR7	1	Aggregation of cells	0% (0/1)
2	6	1	LAMP2	4	IGF1,ITGAV,TGFB1,TIMP1	1	Apoptosis of hepatic stellate cells	0% (0/1)
2	6	1	belnacasan	4	Ccl2,CCL3L3,CXCL3,IL18	1	Binding of leukocytes	0% (0/1)
2	6	1	C8	4	Ccl2,CCL3L3,CXCL2,CXCL3	1	Binding of leukocytes	0% (0/1)
2	6	1	C7	4	Ccl2,CCL3L3,CXCL2,CXCL3	1	Binding of leukocytes	0% (0/1)
2	6	1	thioctic acid	4	Ccl2,CCL2,IL18,LPL	1	Binding of tumor cell lines	0% (0/1)
2	6	1	ZNF106	4	C3,LGALS1,LGALS3,S100A8	1	Cell movement of antigen presenting cells	0% (0/1)
2	6	1	belnacasan	4	Ccl2,CCL3L3,CXCL3,IL18	1	Cell movement of granulocytes	0% (0/1)
2	6	1	as605240	4	CXCL2,CXCL3,MMP9,TGFB1	1	Cell movement of granulocytes	0% (0/1)
2	6	1	C8	4	Ccl2,CCL3L3,CXCL2,CXCL3	1	Cell movement of granulocytes	0% (0/1)
2	6	1	C7	4	Ccl2,CCL3L3,CXCL2,CXCL3	1	Cell movement of granulocytes	0% (0/1)
2	6	1	eflornithine	4	C3,FN1,LGALS3,SERPINE1	1	Cell movement of granulocytes	0% (0/1)
2	6	1	VIM	4	CCL2,F3,PLAU,TGFB1	1	Cell movement of granulocytes	0% (0/1)
2	6	1	belnacasan	4	Ccl2,CCL3L3,CXCL3,IL18	1	Cell movement of macrophages	0% (0/1)
2	6	1	WLS	4	BMPR2,Ccl2,CCL22,CXCL2	1	Cell movement of myeloid cells	100% (1/1)
2	6	1	laminaran	4	CLEC4E,CRLF2,INHBA,TNFRSF9	1	Cell movement of myeloid cells	0% (0/1)
2	6	1	VIM	4	CCL2,F3,PLAU,TGFB1	1	Cell movement of myeloid cells	0% (0/1)
2	6	1	belnacasan	4	Ccl2,CCL3L3,CXCL3,IL18	1	Cell movement of neutrophils	0% (0/1)
2	6	1	CDK9	4	CCL5,CXCL2,MMP9,PDK4	1	Cell movement of neutrophils	0% (0/1)
2	6	1	as605240	4	CXCL2,CXCL3,MMP9,TGFB1	1	Cell movement of neutrophils	0% (0/1)
2	6	1	C8	4	Ccl2,CCL3L3,CXCL2,CXCL3	1	Cell movement of neutrophils	0% (0/1)
2	6	1	C7	4	Ccl2,CCL3L3,CXCL2,CXCL3	1	Cell movement of neutrophils	0% (0/1)
2	6	1	LOXL1	4	Ccl2,MMP12,MMP9,TIMP1	1	Cell movement of neutrophils	0% (0/1)
2	6	1	bromodeoxyuridine	4	CSF1,IL24,INHBA,SERPINE1	1	Cell movement of phagocytes	0% (0/1)
2	6	1	Irgm1	4	Ccl2,CCL5,LILRB4,TLR2	1	Cellular infiltration	0% (0/1)
2	6	1	belnacasan	4	Ccl2,CCL3L3,CXCL3,IL18	1	Cellular infiltration by leukocytes	0% (0/1)
2	6	1	C8	4	Ccl2,CCL3L3,CXCL2,CXCL3	1	Cellular infiltration by leukocytes	0% (0/1)
2	6	1	WLS	4	BMPR2,Ccl2,CCL22,CXCL2	1	Cellular infiltration by leukocytes	100% (1/1)
2	6	1	C7	4	Ccl2,CCL3L3,CXCL2,CXCL3	1	Cellular infiltration by leukocytes	0% (0/1)
2	6	1	as605240	4	CXCL2,CXCL3,MMP9,TGFB1	1	Cellular infiltration by myeloid cells	100% (1/1)
2	11	1	ABCB4	9	Ccl2,CCL21,CCR1,LGALS3,MMP9,SPP1,STING1,TGFB1,TIMP1	1	Cellular infiltration by myeloid cells	100% (1/1)
2	6	1	LOXL1	4	Ccl2,MMP12,MMP9,TIMP1	1	Cellular infiltration by myeloid cells	0% (0/1)
2	6	1	as605240	4	CXCL2,CXCL3,MMP9,TGFB1	1	Cellular infiltration by phagocytes	100% (1/1)
2	11	1	ABCB4	9	Ccl2,CCL21,CCR1,LGALS3,MMP9,SPP1,STING1,TGFB1,TIMP1	1	Cellular infiltration by phagocytes	100% (1/1)
2	6	1	LOXL1	4	Ccl2,MMP12,MMP9,TIMP1	1	Cellular infiltration by phagocytes	0% (0/1)
2	11	1	gentamicin	9	Ccl2,CCL2,CSF1,LCN2,LGALS1,LGALS3,LITAF,SPP1,TGFB1	1	Chemotaxis of leukocytes	0% (0/1)
2	6	1	belnacasan	4	Ccl2,CCL3L3,CXCL3,IL18	1	Chemotaxis of myeloid cells	0% (0/1)
2	6	1	C8	4	Ccl2,CCL3L3,CXCL2,CXCL3	1	Chemotaxis of myeloid cells	0% (0/1)
2	6	1	JAK inhibitor I	4	C3,CXCL2,CXCL3,CXCL6	1	Chemotaxis of myeloid cells	0% (0/1)
2	6	1	C7	4	Ccl2,CCL3L3,CXCL2,CXCL3	1	Chemotaxis of myeloid cells	0% (0/1)
2	6	1	belnacasan	4	Ccl2,CCL3L3,CXCL3,IL18	1	Chemotaxis of phagocytes	0% (0/1)
2	6	1	C8	4	Ccl2,CCL3L3,CXCL2,CXCL3	1	Chemotaxis of phagocytes	0% (0/1)
2	6	1	JAK inhibitor I	4	C3,CXCL2,CXCL3,CXCL6	1	Chemotaxis of phagocytes	0% (0/1)
2	6	1	C7	4	Ccl2,CCL3L3,CXCL2,CXCL3	1	Chemotaxis of phagocytes	0% (0/1)
2	6	1	inosine	4	C1QA,C3,C4A/C4B,CFB	1	Damage of kidney	0% (0/1)
2	11	1	TREM1	9	ADORA2B,ATF3,CD14,CXCL3,GLA,ITGAX,PLAC8,PLD1,TLR2	1	Degranulation of myeloid cells	100% (1/1)
2	6	1	G protein alphai	4	ATF3,C4A/C4B,FCGR2A,FCGR2B	1	Degranulation of myeloid cells	0% (0/1)
2	11	1	TREM1	9	ADORA2B,ATF3,CD14,CXCL3,GLA,ITGAX,PLAC8,PLD1,TLR2	1	Degranulation of phagocytes	100% (1/1)
2	6	1	deferasirox	4	FAM20C,GAS7,PPARG,TNFSF10	1	Differentiation of connective tissue cells	0% (0/1)
2	6	1	U0126	4	Ccl2,CCL2,CCL3L3,MMP9	1	Experimental autoimmune myocarditis	0% (0/1)
2	6	1	Ige	4	Ccl2,CCL2,CCL3L3,CCR5	1	Experimental autoimmune myocarditis	0% (0/1)
2	6	1	EGR1	4	Ccl2,CCL2,CCL3L3,MMP9	1	Experimental autoimmune myocarditis	0% (0/1)
2	6	1	P38 MAPK	4	Ccl2,CCL2,CCL3L3,MMP9	1	Experimental autoimmune myocarditis	0% (0/1)
2	6	1	pyrrolidine dithiocarbamate	4	Ccl2,CCL2,CCR5,MMP9	1	Experimental autoimmune myocarditis	0% (0/1)
2	6	1	PD98059	4	Ccl2,CCL2,CCL3L3,MMP9	1	Experimental autoimmune myocarditis	0% (0/1)
[truncated: 584 more rows]
