# Supplementary material for: Time-Course of Transcriptomic Change in the Lungs of F344 Rats Repeatedly Exposed to a Multiwalled Carbon Nanotube in a 2-Year Test
Source: Nanomaterials (Basel). 2023 Jul 19;13(14):2105. doi: 10.3390/nano13142105 (PMC10383707; doi:10.3390/nano13142105)
Supplement: Supplementary file 1 [file nanomaterials-13-02105-s001.zip › Table S7 PCR validation.xlsx]

## Sheet: Table S7 validation qRT-PCR
Table S7. Validation of RNA-seq data by qRT-PCR
Gene symbol		RNAseq									qRT-PCR
		Year 0.5			Year 1			Year 2			Year 0.5			Year 1			Year 2
		Control	MWCNT		Control	MWCNT		Control	MWCNT		Control	MWCNT		Control	MWCNT		Control	MWCNT
		(N = 3)	(N = 3)		(N = 3)	(N = 3)		(N = 3)	(N = 3)		(N = 4)	(N = 5)		(N = 5)	(N = 4)		(N = 6)	(N = 6)
Spp1		1	460		0.646671	370		0.882728	320		1	180		1.31435	190		1.20528	220
Mt3		1	63.6113		0.170123	110		0.641294	250		1	39.811		1.20815	70.4978		0.96265	150
Mmp12		1	46.9971		1.02571	55.1068		1.25198	79.9864		1	30.017		1.24357	38.4123		1.8368	57.9718
Ccl2		1	12.456		0.555787	13.6341		1.17215	13.3253		1	7.98986		0.908798	8.09129		1.19989	5.99691
Il6		1	7.85172		1.47413	4.94495		2.48124	7.34512		1	2.3186		1.0005	1.97431		1.4004	2.73067
Zfp36		1	0.762607		0.882028	0.555568		0.726922	0.561421		1	0.452693		0.999765	0.435498		0.637318	0.344582
Plau		1	2.17659		0.754228	1.93316		0.707564	2.20391		1	1.21369		0.810707	1.06987		0.828934	1.31604
Plaur		1	2.98746		1.51485	3.04001		1.16026	4.06809		1	1.90417		1.12099	1.82413		0.970921	1.80591
Egfr		1	1.07923		1.22193	0.978933		0.856995	0.996521		1	0.530924		0.749431	0.37571		0.686608	0.65964
Erbb2		1	0.940696		1.16417	0.894825		1.01059	0.963361		1	0.480008		0.8609	0.429675		0.763739	0.533225
Erbb3		1	1.30096		1.09687	1.21857		0.989892	1.38422		1	0.691209		0.839943	0.467731		0.658183	0.583762
Erbb4		1	0.335461		1.02204	0.243852		0.54133	0.0605429		1	0.215871		0.770692	0.115796		0.774656	0.0594351
Egf		1	0.405753		0.876778	0.47238		0.852799	0.274084		1	0.384193		1.22956	0.307321		0.771757	0.426145
Areg		1	5.68761		0.864928	3.2553		0.597535	5.12792		1	4.00814		0.788405	1.79787		0.283246	2.08454
Ereg		1	3.57301		0.836025	2.29923		0.474675	3.06936		1	1.67194		0.979468	1.32573		0.557617	1.72377
Btc		1	1.51377		1.24251	1.31715		0.33606	1.45871		1	0.558517		0.642886	0.766575		0.571	1.1831
Nrg1		1	1.18128		1.07238	1.37499		0.866877	1.64586		1	0.544919		0.938234	0.531634		0.760974	0.643845
Aplnr		1	0.369629		0.609077	0.330343		0.797937	0.216587		1	0.319468		0.68226	0.188952		0.730322	0.136313
Ephb4		1	0.569521		0.934384	0.530445		0.951458	0.396624		1	0.354857		0.741606	0.198176		0.516461	0.154
Unc5d*		0.924647	0.475255		1	0.249659		0.837378	0.0463862		0.289567	0.173289		1	0.366791		1.53879	0.353499
Cav1*		1.01811	0.442272		1	0.390645		0.857328	0.216601		ND	ND		1	0.638243		3.19134	0.871027
Wif1		1	0.625682		0.699464	0.599988		0.623754	0.482382		1	0.481913		0.72072	0.318657		0.617135	0.322157
Fold change compared with control group at Year 0.5
* Unc5d and Cav1 were normalized by control group at Year 1
