# Supplementary material for: Time-Course of Transcriptomic Change in the Lungs of F344 Rats Repeatedly Exposed to a Multiwalled Carbon Nanotube in a 2-Year Test
Source: Nanomaterials (Basel). 2023 Jul 19;13(14):2105. doi: 10.3390/nano13142105 (PMC10383707; doi:10.3390/nano13142105)
Supplement: Supplementary file 1 [file nanomaterials-13-02105-s001.zip › Table S8 Overview of previous transcriptomic analyses_MH revised_July 19.xlsx]

## Sheet: Table S8
	Table S8. Overview of previous transcriptomic analyses for rodent lungs exposed to CNTs.
	Author	CNTs	Exposure method	Analysis	Top ranked pathways	Top ranked GO terms	References
	Poulsen et al.	MWNT-7 (Hodogaya)	mouse IT	IPA	Pyrimidine ribonucleotides de novo biosynthesis, Acute Phase Response Signaling, Retinol viosynthesis		[39] 2013, PLOS ONE doi.org/10.1371/journal.pone.0080452
	Poulsen et al.	NRCWE-026/NC-7000(Nanocyl), NM-401 (EUJRC)	mouse IT	IPA	Aryl Hydrocarbon Receptor Signalilng, Antigen Presentation Pathway, Hepatic Fibrosis/hepatic Stellate Cell Activation, IL-10 signaling		Ref [16] 2015, Toxicol Applied Pharmacol doi.org/10.1016/j.taap.2014.12.011
	Fujita et al.	SWCNT (Nikkiso)	rat IT	GOstat		Inflammatory response, Chemotaxis, Immune system process, Cell proliferation	Ref [17] 2015, Nanotoxicology doi: 10.3109/17435390.2014.921737
	Kinaret et al.	MWNT-7 (Mitsui)	mouse Inhal/PA	KEGG, DAVID	Cell cycle, Chemokine signaling, Complement and coagulation cascades, Toll-like receptor signaling	Inflammatory response, Mitotic cell cycle, Chemotaxis, cell chemotaxis	[40] 2017, ACSNano doi.org/10.1021/acsnano.6b05652
	Rahman et al.	NM401 (EUJRC), MWNT-7 (Mitsui)	mouse IT	DAVID		Immune response, inflammatory response, cell adhesion, Cell proliferation	[41] 2017, Mutat Res Gen Tox En doi.org/10.1016/j.mrgentox.2017.08.005
	Khaliullin et al.	MWCNT (Nanotechcenter)	mouse PA	IPA	Protein Kinase A Signaling, Phospholipase C Signaling, Endothelin-1 Signaling		Ref [18] 2020, Toxicol Applied Pharmacol doi.org/10.1016/j.taap.2020.114898
	Sager et al.	MWNT-7 (Mitsui)	rat Inhal	IPA	Kinetochore Metaphase Signaling Pathway, Granulocyte Adhesion and Diapedesis, Agranulocyte Adhesion and Diapedesis, Acute phase Response Signaling		Ref [38] 2022, Inhal Toxicol doi.org/10.1080/08958378.2022.2081386
	Seidel et al.	NM401, NM-403 (EUJRC)	rat Inhal	KEGG, GOC	Complement and coagulation cascades, Viral protein interaction with cytokine and cytokine receptor, Cytokine-cytokine receptor interaction, Chemokine signaling	Neutrophil chemotaxis, response to interleukin-1, Superoxide metaboic process, redox process	Ref [24] 2021, Nanotoxicology doi.org/10.1080/17435390.2020.1851418
	Barthel et al.	MWNT-7 (Mitsui), NM-403 (EUJRC)	rat IT	GO	Cytokine-cytokine receptor interaction, Phagosome, Cell cycle, Complement and coagulation cascades		[42] 2023, Nanotoxicology doi.org/10.1080/17435390.2023.2204933
	Solorio-Rodriguez et al.	SWCNTs: NM-411, NRCWE-051, NRCWE-052, NRCWE-053, NRCWE-054, NRCWE-055, NRCWE-056, NRCWE-057 MWCNTs: NRCWE-061, NRCWE-062, NRCWE-063, NRCWE-064 (Chengdu Organic Chemicals)	mouse IT	IPA	Acute Phase Response Signaling, Agranulocyte Adhesion and Diapedesis, Granulocyte Adhesion and Diapedesis, IL-10 Signaling, Role of Hypercytokinemia/hyperchemokinemia in the Pathogenesis of Influenza, LXR/RXR Activation		Ref [22] 2023, Nanomaterials doi.org/10.3390/nano13061059
	IT: intratracheal instillation
	PA: pharyngeal aspiration
