# Supplementary material for: Time-Course of Transcriptomic Change in the Lungs of F344 Rats Repeatedly Exposed to a Multiwalled Carbon Nanotube in a 2-Year Test
Source: Nanomaterials (Basel). 2023 Jul 19;13(14):2105. doi: 10.3390/nano13142105 (PMC10383707; doi:10.3390/nano13142105)
Supplement: Supplementary file 1 [file nanomaterials-13-02105-s001.zip › Table S9 Pathways and Gene Ontology terms found in previous studies_MH revised_July 19.xlsx]

## Sheet: Table S9
Table S9. Pathways and Gene Ontology terms found in previous in vivo studies.
Canonical pathway	Authors	Listed in the present study		KEGG pathway	Authors		GO term	Authors
Acute phase response signaling	Poulsen et al., 2013	✓		Viral mycoarditis	Kinaret et al., 2017		inflammatory response	Fujita et al., 2015
Acute phase response signaling	Poulsen et al., 2013	✓		Dilated cardiomyopathy (DCM)	Kinaret et al., 2017		chemotaxis	Fujita et al., 2015
Aldosterone Signaling in Epithelial Cells	Poulsen et al., 2013	✓		Hypertrophic cardiomyopathy (HCM)	Kinaret et al., 2017		leukocyte chemotaxis	Fujita et al., 2015
Aryl Hydrocarbon Receptor Signaling	Poulsen et al., 2013	✓		Graft-versus host disease	Kinaret et al., 2017		leukocyte migration	Fujita et al., 2015
Chemokine Signaling	Poulsen et al., 2013	✓		Systemic lupus erythematosus	Kinaret et al., 2017		Defense response	Fujita et al., 2015
Estrogen-mediated S-phase Entry	Poulsen et al., 2013	✓		Asthma	Kinaret et al., 2017		immune system process	Fujita et al., 2015
Glucocorticoid Receptor Signaling	Poulsen et al., 2013	✓		Prion diseases	Kinaret et al., 2017		cell proliferation	Fujita et al., 2015
Glutathione-mediated Detoxification	Poulsen et al., 2013			Intestinal immune network for IgA production	Kinaret et al., 2017		ion homeostasis	Rahman et al., 2017
IL-17 Signaling	Poulsen et al., 2013	✓		Hematopoietic cell lineage	Kinaret et al., 2017		hemopoiesis	Rahman et al., 2017
LPS/IL-1 Mediated Inhibition of RXR Function	Poulsen et al., 2013	✓		Cytosolic DNA-sensing pathway	Kinaret et al., 2017		regulation of cytokine production	Rahman et al., 2017
LXR/RXR Activation	Poulsen et al., 2013	✓		NOD-like receptor signaling pathway	Kinaret et al., 2017		acute inflammaory response	Rahman et al., 2017
LXR/RXR Activation	Poulsen et al., 2013	✓		Toll-like receptor signaling pathway	Kinaret et al., 2017		skeletal system development	Rahman et al., 2017
Neuregulin signaling	Poulsen et al., 2013	✓		Complement and coagulation cascades	Kinaret et al., 2017		epithelium development	Rahman et al., 2017
Pyrimidine Ribonucleotides De Novo Biosynthesis	Poulsen et al., 2013			ECM-receptor interaction	Kinaret et al., 2017		extracellular structure organization	Rahman et al., 2017
Pyrimidine Ribonucleotides De Novo Biosynthesis	Poulsen et al., 2013			p53 signaling pathway	Kinaret et al., 2017		ossification	Rahman et al., 2017
Retinoate Biosynthesis I	Poulsen et al., 2013			Oocyte meiosis	Kinaret et al., 2017		regulation of cytoskeleton organization	Rahman et al., 2017
Retinol Biosynthesis	Poulsen et al., 2013			Cell cycle	Kinaret et al., 2017		complement activation, classical pathway	Rahman et al., 2017
Role of Tissue Factor In Cancer	Poulsen et al., 2013	✓		Chemokine signaling pathway	Kinaret et al., 2017		intracellular signaling cascade	Rahman et al., 2017
Acute Phase Response Signaling	Poulsen et al., 2015	✓		Cytokine-cytokine receptor interaction	Kinaret et al., 2017		apoptosis	Rahman et al., 2017
Atherosclerosis Signaling	Poulsen et al., 2015	✓		Homologous recombination	Kinaret et al., 2017		angiogenesis	Rahman et al., 2017
B Cell Development	Poulsen et al., 2015	✓		PPAR signaling pathway	Kinaret et al., 2017		regulation of mapkkk cascade	Rahman et al., 2017
Calcium-induced T lymphocyte apoptosis	Poulsen et al., 2015			DNA replication	Kinaret et al., 2017		atp metabolic process	Rahman et al., 2017
Chondroitin Sulfate Degradation	Poulsen et al., 2015			Drug metabolism	Kinaret et al., 2017		response to oxidative stress	Rahman et al., 2017
Crosstalk between Dendritic Cells and Natural Killer Cells	Poulsen et al., 2015			Metabolism of xenobiotics by cytochrome P450	Kinaret et al., 2017		anti-apoptosis	Rahman et al., 2017
Dendritic Cell Maturation	Poulsen et al., 2015			Retinol metabolism	Kinaret et al., 2017		regulation of DNA binding	Rahman et al., 2017
Dermatan Sulfate Degradation	Poulsen et al., 2015			Arachidoic acid metabolism	Kinaret et al., 2017		inflammatory response	Kinaret et al., 2017
Hematopoiesis From Pluripotent Stem Cells	Poulsen et al., 2015			Complement and coagulation cascades	Seidel et al., 2021		mitotic cell cycle	Kinaret et al., 2017
Hepatic Fibrosis / Hepatic Stellate Cell Activation	Poulsen et al., 2015	✓		Viral protein interaction with cytokine and cytokine receptor	Seidel et al., 2021		chemotaxis	Kinaret et al., 2017
Hypoxia Signaling In the Cardiovascular System	Poulsen et al., 2015			Cytokine-cytokine receptor interaction	Seidel et al., 2021		cell chemotaxis	Kinaret et al., 2017
IL-10 Signaling	Poulsen et al., 2015	✓		IL-17 signaling pathway	Seidel et al., 2021		taxis	Kinaret et al., 2017
Il-8 signaling	Poulsen et al., 2015	✓		Cardiac muscle contraction	Seidel et al., 2021		positive regulation of leukocyte migration	Kinaret et al., 2017
LXR/RXR Activation	Poulsen et al., 2015			Phagosome	Seidel et al., 2021		regulation of inflammatory response	Kinaret et al., 2017
Oxidative Ethanol Degradation	Poulsen et al., 2015			Chemokine signaling pathway	Seidel et al., 2021		leukocyte migration	Kinaret et al., 2017
Primary Immunodeficiency Signaling	Poulsen et al., 2015	✓		Pertussis	Seidel et al., 2021		Neutrophil chemotaxis	Seidel et al., 2021
Pyrimidine Deoxyribonucleotides De Novo Biosynthesis I	Poulsen et al., 2015	✓		Cell cycle	Seidel et al., 2021		response to interleukin-1	Seidel et al., 2021
Retinol Biosynthesis	Poulsen et al., 2015			Osteoclast differentiation	Seidel et al., 2021		Superoxide metaboic process	Seidel et al., 2021
Tryacylglycerol Degradation	Poulsen et al., 2015			Staphylococcus aureus infection	Seidel et al., 2021		redox process	Seidel et al., 2021
Endothelin-1 Signaling	Khaliullin et al., 2020	✓		Adrenergic signaling in cardiomyocytes	Seidel et al., 2021
Phospholipase C signaling	Khaliullin et al., 2020			Prion diseases	Seidel et al., 2021
Protein Kinase A Signaling	Khaliullin et al., 2020	✓		Rheumatoid arthritis	Seidel et al., 2021		References
Acute Phase Response Signaling	Sager et al., 2022	✓		Dilated cardiomyopathy (DCM)	Seidel et al., 2021		Poulsen et al., 2013	[39]
Agranulocyte Adhesion and Diapedesis	Sager et al., 2022	✓		AGE-RAGE signaling pathway in diabetic complications	Seidel et al., 2021		Poulsen et al., 2015	Ref [16]
Cell Cycle Control of Chromosomal Replication	Sager et al., 2022			Lysosome	Seidel et al., 2021		Fujita et al., 2015	Ref [17]
Communication between Innate and Adaptive Immune Cells	Sager et al., 2022			Calcium signaling pathway	Seidel et al., 2021		Kinaret et al., 2017	[40]
Complement System	Sager et al., 2022	✓		Legionellosis	Seidel et al., 2021		Rahman et al., 2017	[41]
Granulocyte Adhesion and Diapedesis	Sager et al., 2022	✓		Hypertrophic cardiomyopathy (HCM)	Seidel et al., 2021		Khaliullin et al., 2020	Ref [18]
Kinetochore Metaphase Signaling Pathway	Sager et al., 2022	✓		TNF signaling pathway	Seidel et al., 2021		Sager et al., 2022	Ref [38]
LXR/RXR Activation	Sager et al., 2022			p53 signaling pathway	Seidel et al., 2021		Seidel et al., 2021	Ref [24]
Phagosome Formation	Sager et al., 2022	✓		Chagas disease (American trypanosomiasis)	Seidel et al., 2021		Barthel et al., 2023	[42]
TREM1 signaling	Sager et al., 2022	✓		PPAR signaling pathway	Seidel et al., 2021		Solorio-Rodriguez et al., 2023	Ref [22]
4-1BB Signaling in T Lymphocytes	Solorio-Rodriguez et al., 2023			Circadian rhythm	Seidel et al., 2021
Activation of IRF by Cytosolic Pattern Recognition Receptors	Solorio-Rodriguez et al., 2023			Thyroid hormone synthesis	Seidel et al., 2021
Acute Phase Response Signaling	Solorio-Rodriguez et al., 2023	✓		Aldosterone-regulated sodium reabsorption	Seidel et al., 2021
Adrenomedullin signaling pathway	Solorio-Rodriguez et al., 2023	✓		Neomycin, kanamycin and gentamicin biosynthesis	Seidel et al., 2021
Agranulocyte Adhesion and Diapedesis	Solorio-Rodriguez et al., 2023	✓		Rap1 signaling pathway	Seidel et al., 2021
Airway Inflammation in Asthma	Solorio-Rodriguez et al., 2023	✓		NF-kappa B signaling pathway	Seidel et al., 2021
Airway Pathology in Chronic Obstructive Pulmonary Disease	Solorio-Rodriguez et al., 2023	✓		Oocyte meiosis	Seidel et al., 2021
Aldosterone Signaling in Epithelial Cells	Solorio-Rodriguez et al., 2023	✓		PI3K-Akt signaling pathway	Seidel et al., 2021
Altered T Cell and B Cell Signaling in Rheumatoid Arthritis	Solorio-Rodriguez et al., 2023			Apelin signaling pathway	Seidel et al., 2021
AMPK Signaling	Solorio-Rodriguez et al., 2023	✓		Focal adhesion	Seidel et al., 2021
Antioxidant Action of Vitamin C	Solorio-Rodriguez et al., 2023	✓		ECM-receptor interaction	Seidel et al., 2021
April Mediated Signaling	Solorio-Rodriguez et al., 2023			Toll-like receptor signaling pathway	Seidel et al., 2021
Aryl Hydrocarbon Receptor Signaling	Solorio-Rodriguez et al., 2023	✓		NOD-like receptor signaling pathway	Seidel et al., 2021
Atherosclerosis Signaling	Solorio-Rodriguez et al., 2023	✓		Hematopoietic cell lineage	Seidel et al., 2021
B Cell Activating Factor Signaling	Solorio-Rodriguez et al., 2023			Progesterone-mediated oocyte maturation	Seidel et al., 2021
B Cell Receptor Signaling	Solorio-Rodriguez et al., 2023			GnRH secretion	Seidel et al., 2021
BAG2 Signaling Pathway	Solorio-Rodriguez et al., 2023			Amoebiasis	Seidel et al., 2021
Breast Cancer Regulation by Stathmin1	Solorio-Rodriguez et al., 2023	✓		Tuberculosis	Seidel et al., 2021
cAMP-mediated Signaling	Solorio-Rodriguez et al., 2023	✓		Human cytomegalovirus infection	Seidel et al., 2021
Cardiac Hypertrophy Signaling (Enhanced)	Solorio-Rodriguez et al., 2023	✓		Human papillomavirus infection	Seidel et al., 2021
CD27 Signaling in Lymphocytes	Solorio-Rodriguez et al., 2023			Human T-cell leukemia virus 1 infection	Seidel et al., 2021
CD40 Signaling	Solorio-Rodriguez et al., 2023			Transcriptional misregulation in cancer	Seidel et al., 2021
Cell Cycle Control of Chromosomal Replication	Solorio-Rodriguez et al., 2023			Viral protein interaction with cytokine and cytokine receptor	Seidel et al., 2021
Chemokine Signaling	Solorio-Rodriguez et al., 2023	✓		Cytokine-cytokine receptor interaction	Seidel et al., 2021
Cholecystokinin/Gastrin-mediated Signaling	Solorio-Rodriguez et al., 2023	✓		Chemokine signaling pathway	Seidel et al., 2021
Circadian Rhythm Signaling	Solorio-Rodriguez et al., 2023	✓		Rheumatoid arthritis	Seidel et al., 2021
Coagulation System	Solorio-Rodriguez et al., 2023	✓		IL-17 signaling pathway	Seidel et al., 2021
Colorectal Cancer Metastasis Signaling	Solorio-Rodriguez et al., 2023	✓		Amoebiasis	Seidel et al., 2021
Communication between Innate and Adaptive Immune Cells	Solorio-Rodriguez et al., 2023			Pertussis	Seidel et al., 2021
Complement System	Solorio-Rodriguez et al., 2023	✓		Prion diseases	Seidel et al., 2021
Coronavirus Pathogenesis Pathway	Solorio-Rodriguez et al., 2023			TNF signaling pathway	Seidel et al., 2021
Coronavirus Replication Pathway	Solorio-Rodriguez et al., 2023	✓		Complement and coagulation cascades	Seidel et al., 2021
CREB Signaling in Neurons	Solorio-Rodriguez et al., 2023	✓		Arginine biosynthesis	Seidel et al., 2021
Crosstalk between Dendritic Cells and Natural Killer Cells	Solorio-Rodriguez et al., 2023	✓		Neomycin, kanamycin and gentamicin biosynthesis	Seidel et al., 2021
Death Receptor Signaling	Solorio-Rodriguez et al., 2023			Pantothenate and CoA biosynthesis	Seidel et al., 2021
Dendritic Cell Maturation	Solorio-Rodriguez et al., 2023			NF-kappa B signaling pathway	Seidel et al., 2021
Differential Regulation of Cytokine Production in Intestinal Epithelial Cells by IL-17A and IL-17F	Solorio-Rodriguez et al., 2023	✓		Toll-like receptor signaling pathway	Seidel et al., 2021
Differential Regulation of Cytokine Production in Macrophages and T Helper Cells by IL-17A and IL-17F	Solorio-Rodriguez et al., 2023	✓		NOD-like receptor signaling pathway	Seidel et al., 2021
Dopamine Degradation	Solorio-Rodriguez et al., 2023			Cytosolic DNA-sensing pathway	Seidel et al., 2021
Dopamine Receptor Signaling	Solorio-Rodriguez et al., 2023	✓		Intestinal immune network for IgA production	Seidel et al., 2021
Eicosanoid Signaling	Solorio-Rodriguez et al., 2023	✓		Legionellosis	Seidel et al., 2021
Endocannabinoid Cancer Inhibition Pathway	Solorio-Rodriguez et al., 2023			Chagas disease (American trypanosomiasis)	Seidel et al., 2021
eNOS Signaling	Solorio-Rodriguez et al., 2023	✓		Staphylococcus aureus infection	Seidel et al., 2021
Erythropoietin Signaling Pathway	Solorio-Rodriguez et al., 2023	✓		Human T-cell leukemia virus 1 infection	Seidel et al., 2021
Erythropoietin Signaling Pathway	Solorio-Rodriguez et al., 2023	✓		Systemic lupus erythematosus	Seidel et al., 2021
Ethanol Degradation IV	Solorio-Rodriguez et al., 2023			Mucin type O-glycan biosynthesis	Barthel et al., 2023
Extrinsic Prothrombin Activation Pathway	Solorio-Rodriguez et al., 2023	✓		Drug metabolism- cytochrome P450	Barthel et al., 2023
Ferroptosis Signaling Pathway	Solorio-Rodriguez et al., 2023	✓		ECM-receptor interaction	Barthel et al., 2023
FXR/RXR Activation	Solorio-Rodriguez et al., 2023	✓		Cytokine-cytokine receptor interaction	Barthel et al., 2023
Germ Cell-Sertoli Cell Junction Signaling	Solorio-Rodriguez et al., 2023	✓		cell adheseion molecules (CAMs)	Barthel et al., 2023
Glucocorticoid Receptor Signaling	Solorio-Rodriguez et al., 2023	✓		Phagosome	Barthel et al., 2023
Glutathione-mediated Detoxification	Solorio-Rodriguez et al., 2023			p53 signaling pathway	Barthel et al., 2023
G-Protein Coupled Receptor Signaling	Solorio-Rodriguez et al., 2023	✓		Cell cycle	Barthel et al., 2023
Graft-versus-Host Disease Signaling	Solorio-Rodriguez et al., 2023			Toll-like receptor signaling pathway	Barthel et al., 2023
Granulocyte Adhesion and Diapedesis	Solorio-Rodriguez et al., 2023	✓		Il-17 signaling pathway	Barthel et al., 2023
Gαi Signaling	Solorio-Rodriguez et al., 2023	✓		Complement and coagulation cascades	Barthel et al., 2023
Gαs Signaling	Solorio-Rodriguez et al., 2023	✓		Chemokine signaling pathway	Barthel et al., 2023
Hepatic Cholestasis	Solorio-Rodriguez et al., 2023	✓
Hepatic Fibrosis / Hepatic Stellate Cell Activation	Solorio-Rodriguez et al., 2023	✓
Hepatic Fibrosis Signaling Pathway	Solorio-Rodriguez et al., 2023	✓
HIF1α Signaling	Solorio-Rodriguez et al., 2023	✓
HMGB1 Signaling	Solorio-Rodriguez et al., 2023	✓
HOTAIR Regulatory Pathway	Solorio-Rodriguez et al., 2023	✓
IGF-1 Signaling	Solorio-Rodriguez et al., 2023
IL-1 Signaling	Solorio-Rodriguez et al., 2023	✓
IL-10 Signaling	Solorio-Rodriguez et al., 2023	✓
IL-12 Signaling and Production in Macrophages	Solorio-Rodriguez et al., 2023	✓
IL-15 Production	Solorio-Rodriguez et al., 2023	✓
IL-17 Signaling	Solorio-Rodriguez et al., 2023	✓
IL-17A Signaling in Airway Cells	Solorio-Rodriguez et al., 2023
IL-17A Signaling in Fibroblasts	Solorio-Rodriguez et al., 2023
IL-23 Signaling Pathway	Solorio-Rodriguez et al., 2023
IL-6 Signaling	Solorio-Rodriguez et al., 2023	✓
IL-9 Signaling	Solorio-Rodriguez et al., 2023
ILK Signaling	Solorio-Rodriguez et al., 2023	✓
Induction of Apoptosis by HIV1	Solorio-Rodriguez et al., 2023
Inhibition of Matrix Metalloproteases	Solorio-Rodriguez et al., 2023	✓
iNOS Signaling	Solorio-Rodriguez et al., 2023
Insulin Secretion Signaling Pathway	Solorio-Rodriguez et al., 2023
Iron homeostasis signaling pathway	Solorio-Rodriguez et al., 2023	✓
JAK/Stat Signaling	Solorio-Rodriguez et al., 2023
Kinetochore Metaphase Signaling Pathway	Solorio-Rodriguez et al., 2023	✓
LPS/IL-1 Mediated Inhibition of RXR Function	Solorio-Rodriguez et al., 2023	✓
LPS-stimulated MAPK Signaling	Solorio-Rodriguez et al., 2023
LXR/RXR Activation	Solorio-Rodriguez et al., 2023	✓
Lymphotoxin β Receptor Signaling	Solorio-Rodriguez et al., 2023
Mevalonate Pathway I	Solorio-Rodriguez et al., 2023
MIF Regulation of Innate Immunity	Solorio-Rodriguez et al., 2023	✓
MSP-RON Signaling In Macrophages Pathway	Solorio-Rodriguez et al., 2023	✓
MSP-RON Signaling Pathway	Solorio-Rodriguez et al., 2023	✓
Myc Mediated Apoptosis Signaling	Solorio-Rodriguez et al., 2023
Natural Killer Cell Signaling	Solorio-Rodriguez et al., 2023
NER Pathway	Solorio-Rodriguez et al., 2023
Neuregulin Signaling	Solorio-Rodriguez et al., 2023	✓
Neuroinflammation Signaling Pathway	Solorio-Rodriguez et al., 2023	✓
NF-κB Signaling	Solorio-Rodriguez et al., 2023
Nicotine Degradation II	Solorio-Rodriguez et al., 2023
Nicotine Degradation III	Solorio-Rodriguez et al., 2023
Noradrenaline and Adrenaline Degradation	Solorio-Rodriguez et al., 2023
NRF2-mediated Oxidative Stress Response	Solorio-Rodriguez et al., 2023
Osteoarthritis Pathway	Solorio-Rodriguez et al., 2023	✓
Ovarian Cancer Signaling	Solorio-Rodriguez et al., 2023	✓
p38 MAPK Signaling	Solorio-Rodriguez et al., 2023	✓
Pancreatic Adenocarcinoma Signaling	Solorio-Rodriguez et al., 2023	✓
PFKFB4 Signaling Pathway	Solorio-Rodriguez et al., 2023
Phagosome Formation	Solorio-Rodriguez et al., 2023	✓
Phagosome Maturation	Solorio-Rodriguez et al., 2023	✓
PI3K Signaling in B Lymphocytes	Solorio-Rodriguez et al., 2023	✓
PI3K/AKT Signaling	Solorio-Rodriguez et al., 2023
PPAR Signaling	Solorio-Rodriguez et al., 2023
PPARα/RXRα Activation	Solorio-Rodriguez et al., 2023	✓
Production of Nitric Oxide and Reactive Oxygen Species In Macrophages	Solorio-Rodriguez et al., 2023
Putrescine Degradation III	Solorio-Rodriguez et al., 2023
PXR/RXR Activation	Solorio-Rodriguez et al., 2023
Pyrimidine Deoxyribonucleotides De Novo Biosynthesis I	Solorio-Rodriguez et al., 2023	✓
Pyrimidine Ribonucleotides De Novo Biosynthesis	Solorio-Rodriguez et al., 2023
Pyrimidine Ribonucleotides Interconversion	Solorio-Rodriguez et al., 2023
Regulation Of The Epithelial Mesenchymal Transition By Growth Factors Pathway	Solorio-Rodriguez et al., 2023	✓
Remodeling of Epithelial Adherens Junctions	Solorio-Rodriguez et al., 2023	✓
Role of Cytokines in Mediating Communication between Immune Cells	Solorio-Rodriguez et al., 2023
Role of Hypercytokinemia/hyperchemokinemia in the Pathogenesis of Influenza	Solorio-Rodriguez et al., 2023	✓
Role of IL-17A in Arthritis	Solorio-Rodriguez et al., 2023
Role of IL-17F in Allergic Inflammatory Airway Diseases	Solorio-Rodriguez et al., 2023	✓
Role of JAK family kinases in IL-6-type Cytokine Signaling	Solorio-Rodriguez et al., 2023
Role of Macrophages, Fibroblasts and Endothelial Cells in Rheumatoid Arthritis	Solorio-Rodriguez et al., 2023	✓
Role of MAPK Signaling in Inhibiting the Pathogenesis of Influenza	Solorio-Rodriguez et al., 2023	✓
Role of MAPK Signaling in the Pathogenesis of Influenza	Solorio-Rodriguez et al., 2023	✓
Role of Osteoblasts, Osteoclasts and Chondrocytes in Rheumatoid Arthritis	Solorio-Rodriguez et al., 2023	✓
Role of Pattern Recognition Receptors in Recognition of Bacteria and Viruses	Solorio-Rodriguez et al., 2023	✓
Role of PKR in Interferon Induction and Antiviral Response	Solorio-Rodriguez et al., 2023
Role of Tissue Factor In Cancer	Solorio-Rodriguez et al., 2023	✓
Salvage Pathways of Pyrimidine Ribonucleotides	Solorio-Rodriguez et al., 2023	✓
Serotonin Degradation	Solorio-Rodriguez et al., 2023
Serotonin Receptor Signaling	Solorio-Rodriguez et al., 2023	✓
Sertoli Cell-Sertoli Cell Junction Signaling	Solorio-Rodriguez et al., 2023	✓
Sirtuin Signaling Pathway	Solorio-Rodriguez et al., 2023
Small Cell Lung Cancer Signaling	Solorio-Rodriguez et al., 2023
STAT3 Pathway	Solorio-Rodriguez et al., 2023	✓
Sumoylation Pathway	Solorio-Rodriguez et al., 2023
Superpathway of Cholesterol Biosynthesis	Solorio-Rodriguez et al., 2023
Superpathway of Geranylgeranyldiphosphate Biosynthesis I (via Mevalonate)	Solorio-Rodriguez et al., 2023
Superpathway of Melatonin Degradation	Solorio-Rodriguez et al., 2023
Systemic Lupus Erythematosus In B Cell Signaling Pathway	Solorio-Rodriguez et al., 2023
Systemic Lupus Erythematosus Signaling	Solorio-Rodriguez et al., 2023
Th1 and Th2 Activation Pathway	Solorio-Rodriguez et al., 2023	✓
Th1 Pathway	Solorio-Rodriguez et al., 2023	✓
Th17 Activation Pathway	Solorio-Rodriguez et al., 2023
Tight Junction Signaling	Solorio-Rodriguez et al., 2023	✓
TNFR1 Signaling	Solorio-Rodriguez et al., 2023
TNFR2 Signaling	Solorio-Rodriguez et al., 2023
Toll-like Receptor Signaling	Solorio-Rodriguez et al., 2023	✓
TREM1 Signaling	Solorio-Rodriguez et al., 2023	✓
Tryptophan Degradation X (Mammalian, via Tryptamine)	Solorio-Rodriguez et al., 2023
Tumor Microenvironment Pathway	Solorio-Rodriguez et al., 2023	✓
TWEAK Signaling	Solorio-Rodriguez et al., 2023
Type I Diabetes Mellitus Signaling	Solorio-Rodriguez et al., 2023
Unfolded Protein Response	Solorio-Rodriguez et al., 2023
VDR/RXR Activation	Solorio-Rodriguez et al., 2023	✓
Xenobiotic Metabolism AHR Signaling Pathway	Solorio-Rodriguez et al., 2023
Xenobiotic Metabolism CAR Signaling Pathway	Solorio-Rodriguez et al., 2023
Xenobiotic Metabolism General Signaling Pathway	Solorio-Rodriguez et al., 2023
Xenobiotic Metabolism PXR Signaling Pathway	Solorio-Rodriguez et al., 2023
Xenobiotic Metabolism Signaling	Solorio-Rodriguez et al., 2023
