# Supplementary material for: Time-Course of Transcriptomic Change in the Lungs of F344 Rats Repeatedly Exposed to a Multiwalled Carbon Nanotube in a 2-Year Test
Source: Nanomaterials (Basel). 2023 Jul 19;13(14):2105. doi: 10.3390/nano13142105 (PMC10383707; doi:10.3390/nano13142105)
Supplement: Supplementary file 1 [file nanomaterials-13-02105-s001.zip › Table S10 Lung cancer-related genes_MH revised_July 19.xlsx]

## Sheet: Table S10
Table S10. Lung cancer-related genes found in this study
Gene Symbol	Alteration in human lung cancer	DEG expression level in this study (log2FC; vs. Cont)			Rererences
		Y0.5	Y1	Y2
kit	overexplressed	-1.02822		-1.30655	Lung cancer driver genes Kerr et al., 2021 [86] Sholl, 2015 [87] Sato et al, 2007 [88]	doi: 10.1016/j.lungcan.2021.02.026. Epub 2021 Feb 22.
cdkn2a	promoter hypermethylation, LOH		1.98368			doi: 10.5858/arpa.2014-0128-RA. Epub 2014 Sep 25.
met	mutations			1.35424		doi: 10.1097/01.JTO.0000263718.69320.4c
myc	amplification			1.09846
nrg1	rearrangements			1.13437
ntrk1	rearrangements		-1.37304
rarb	promoter hypermethylation			-1.74901
ros1	rearrangements	1.27169		1.27754
vegfa	overexplressed			-1.45135
hspa5	upregulated			1.03656	Proteomic and transcriptomic analysis of lung tumor Tenzer et al., 2016 [89]	doi: 10.18632/oncotarget.7562
cav1	downregulated	-1.06069	-1.12587	-1.77074
selenbp1	downregulated	-1.31524	-1.07298	-1.68982
anln	upregulated	1.98252	1.33471	1.78398	Microarray/RNA-seq analysis in LUAD (a meta-analysis) Lim et al, 2018 [90]	DOI: 10.1038/sdata.2018.136 1
cp	upregulated	1.00344		1.54377
cthrc1	upregulated	1.14457
cxcl13	upregulated		1.28743
hs6st2	upregulated		1.41563	1.34115
mmp12	upregulated	5.70836	5.99497	6.21976
spp1	upregulated	8.97845	9.39546	9.20327
top2a	upregulated	1.5849	1.06272	1.15945
tox3	upregulated	-1.22675		-1.7106
adh7	upregulated			-1.68533	Microarray/RNA-seq analysis in LUSC (a meta-analysis) Lim et al, 2018 [90]	DOI: 10.1038/sdata.2018.136 1
aldh3a1	upregulated		-1.16082	-2.26534
aspm	upregulated	1.40281
aurka	upregulated	1.024
birc5	upregulated	1.21627
bub1b	upregulated	1.82801	1.39384	1.52304
ca12	upregulated		-2.07013	-2.37967
ccna2	upregulated	1.92104	1.35261	1.08491
ccnb1	upregulated	1.69013	1.68342	1.6078
cdc20	upregulated	1.16616
cdc6	upregulated	1.87302	1.91329
cdca3	upregulated	2.02232	1.69813	1.10849
cdca5	upregulated	1.62561
cdk1	upregulated	1.67474	1.35387	1.09018
cdkn3	upregulated	1.50463	1.61318	1.2812
cenpf	upregulated	1.05943
cenpu	upregulated	1.64306		2.36509
cenpw	upregulated			1.69784
cep55	upregulated	1.71751	1.19114	1.21389
cxcl14	upregulated			-1.01104
depdc1	upregulated	2.27319
dsc3	upregulated			2.53106
dsg3	upregulated	1.31622		1.26215
e2f7	upregulated	1.60856
ect2	upregulated	2.16402	1.84382	1.6519
fanci	upregulated	1.13277
fat2	upregulated	2.45623		3.12077
fermt1	upregulated	2.19662	1.8691	4.2421
fgfbp1	upregulated			-1.57876
fndc1	upregulated			2.01154
gins1	upregulated	1.4192	1.47366
gjb6	upregulated	3.68298	2.54139	3.72281
hjurp	upregulated	2.02717	1.16076	1.31055
hmmr	upregulated	1.42012		1.08373
igfbp2	upregulated	-1.15178
itgb8	upregulated	2.23378	2.1251	2.10257
kif11	upregulated	1.69261		1.05703
kif14	upregulated	2.84623	1.87554
kif18b	upregulated	1.40845	1.15166
kif2c	upregulated	1.72347	1.70655
kif4a	upregulated		-1.12112
krt14	upregulated		3.16383	4.84463
krt5	upregulated		5.21118	3.26048
mad2l1	upregulated		1.00936
melk	upregulated	1.70517	1.74266	1.30487
mki67	upregulated	1.59652		1.02086
ncapg	upregulated	1.57596	1.47136	1.75002
ncaph	upregulated	1.45895	1.32859	1.41148
ndc80	upregulated	1.70141	1.10355
ntrk2	upregulated		1.15216	1.38132
nuf2	upregulated	1.61928	1.65558
nusap1	upregulated	1.71307	1.352	1.21049
pbk	upregulated	1.81708	1.36486
perp	upregulated			-1.31598
pkp1	upregulated			1.06935
prc1	upregulated	1.30054	1.0012
pttg1	upregulated	1.84244
rmi2	upregulated		3.84864
rrm2	upregulated	1.76367	1.42734	1.17496
sfn	upregulated	1.42814	1.19576	1.22167
slc16a1	upregulated	1.1041		1.1703
slc2a1	upregulated	1.06984	1.09998	1.21972
slc7a11	upregulated	3.44715	2.06247	3.68454
sox2	upregulated		-1.35368	-1.12977
spc25	upregulated		1.13793
tenm2	upregulated		-2.77352
tk1	upregulated	1.23015	1.07463
tmprss4	upregulated	1.82626	1.69927	1.65221
tpx2	upregulated	1.52123		1.06647
trip13	upregulated	1.12226	1.16491
ttk	upregulated	1.81345	1.47919	1.29718
ube2c	upregulated	1.43038	1.45566	1.35467
uchl1	upregulated		2.08221	1.91413
uhrf1	upregulated	1.38348	1.15917
vsnl1	upregulated			-1.12035
wdr66	upregulated		-1.1243	-1.11198
znf750	upregulated			1.27588
chdh	upregulated	1.21949	1.11078	1.06231	Transcriptome of B6CF1 mice vs human NSCLC Pandiri, et al., 2012 [91]	doi: 10.1177/0192623312447543. Epub 2012 Jun 11.
frk	upregulated			1.07712
gjb1	upregulated	1.57026	1.24504	1.14174
mmp12	upregulated	5.70836	5.99497	6.21976
sertad4	upregulated			1.1009
tc2n	upregulated	1.31127	1.14227	1.33279
abi3bp	downregurated			-1.08283
akap12	downregurated		-1.01718	-1.26065
bmp6	downregurated			-1.26389
cdo1	downregurated		-1.30255	-1.94137
cldn5	downregurated			-1.41482
cyp4b1	downregurated	-1.27412	-1.15576	-1.83422
fam107a	downregurated		-1.84429	-1.68355
fmo3	downregurated		-1.4262	-1.05955
gpm6a	downregurated			-1.63929
npr3	downregurated		-1.03619	-1.32656
ogn	downregurated	-1.15334	-1.12457	-1.31708
pcolce2	downregurated	-1.54101	-1.53402	-2.51068
prx	downregurated			-1.05632
tmem100	downregurated	-1.12683		-1.92929
tnnc1	downregurated	-1.50213
cav1	Candidate tumor suppressor gene	-1.06069	-1.12587	-1.77074	Transcriptome of mouse lung exposed to MWCNT compared with human lung cancer markers Pacurari et al., 2011 [92]	doi: 10.1016/j.taap.2011.05.012
dlc1	Candidate tumor suppressor gene			-1.33287
egf	Oncogene; Prognostic maker for lung cancer	-1.17653		-1.39985
mt3	Oncogene; Prognostic maker for lung cancer	6.05413	8.90147	8.72398
tnfsf9	Oncogene; Prognostic maker for lung cancer	2.87002	2.32738	3.56676
